# Supplementary material for: Identifying breast cancer risk loci by global differential allele-specific expression (DASE) analysis in mammary epithelial transcriptome
Source: PubMed Central journal article supplement (PMC3532379; doi:10.1186/1471-2164-13-570), 2012-10-30
Supplement: 1471-2164-13-570-S1.pdf [file 1471-2164-13-570-S1.pdf]

**Table S1. Global DASE analysis**

| SNP ID       | gene_symbol | chr | coordinate | Sample ID | DASE     |
|--------------|-------------|-----|------------|-----------|----------|
| rs3748597    | NOC2L       | 1   | 878522     | 8         | 0.56472  |
| rs4970441    | KLHL17      | 1   | 887188     | 8         | 0.148737 |
| rs41285812   | PLEKHN1     | 1   | 895985     | 2         | 2.499262 |
| rs28561399   | PLEKHN1     | 1   | 900336     | 2         | 1.857875 |
| rs2340592    | C1orf170    | 1   | 900798     | 2         | 4.524085 |
| rs2340592    | C1orf170    | 1   | 900798     | 4         | 0.52439  |
| GA000031     | AGRN        | 1   | 980243     | 1         | 2.878857 |
| GA000031     | AGRN        | 1   | 980243     | 4         | 4.225445 |
| GA000031     | AGRN        | 1   | 980243     | 3         | 7.423973 |
| rs3766191    | C1orf159    | 1   | 1007450    | 4         | 0.765256 |
| rs3766191    | C1orf159    | 1   | 1007450    | 1         | 4.153483 |
| rs4074137    | C1orf159    | 1   | 1016570    | 1         | 1.269004 |
| rs4074137    | C1orf159    | 1   | 1016570    | 2         | 1.456134 |
| rs1320571    | TTLL10      | 1   | 1110294    | 8         | 2.416536 |
| rs3813204    | TTLL10      | 1   | 1110877    | 7         | 0.645796 |
| rs12036216   | SDF4        | 1   | 1142976    | 6         | 0.811158 |
| rs12093154   | FAM132A     | 1   | 1168788    | 8         | 3.697012 |
| rs12093154   | FAM132A     | 1   | 1168788    | 6         | 2.961987 |
| GA018415     | MIB2        | 1   | 1541790    | 7         | 0.479041 |
| GA018415     | MIB2        | 1   | 1541790    | 2         | 6.521957 |
| rs12755088   | MIB2        | 1   | 1548655    | 4         | 1.145726 |
| rs12755088   | MIB2        | 1   | 1548655    | 3         | 0.407419 |
| SNP1-1628854 | CDC2L2      | 1   | 1628854    | 4         | 6.716753 |
| SNP1-1675900 | NADK        | 1   | 1675900    | 6         | 0.42066  |
| SNP1-1675900 | NADK        | 1   | 1675900    | 1         | 0.437761 |
| rs1884455    | TMEM52      | 1   | 1839604    | 4         | 4.944524 |
| rs3820011    | KIAA1751    | 1   | 1878053    | 1         | 1.386055 |
| SNP1-1890046 | KIAA1751    | 1   | 1890046    | 6         | 1.375868 |
| SNP1-1890046 | KIAA1751    | 1   | 1890046    | 1         | 0.013181 |
| SNP1-1890046 | KIAA1751    | 1   | 1890046    | 2         | 0.671798 |
| SNP1-1890046 | KIAA1751    | 1   | 1890046    | 7         | 1.623036 |
| rs16824588   | KIAA1751    | 1   | 1890092    | 6         | 0.039202 |
| rs16824588   | KIAA1751    | 1   | 1890092    | 3         | 1.324634 |
| rs16824588   | KIAA1751    | 1   | 1890092    | 2         | 1.151325 |
| rs16824588   | KIAA1751    | 1   | 1890092    | 1         | 0.059151 |
| rs12184      | PRKCZ       | 1   | 1977853    | 5         | 1.084595 |
| rs12184      | PRKCZ       | 1   | 1977853    | 3         | 0.161011 |
| rs12184      | PRKCZ       | 1   | 1977853    | 1         | 0.42942  |
| rs3123595    | C1orf86     | 1   | 2107418    | 2         | 3.160142 |
| rs34587196   | MORN1       | 1   | 2280003    | 5         | 5.776355 |
| rs7512269    | PLCH2       | 1   | 2408485    | 1         | 5.530447 |
| rs2296442    | PLCH2       | 1   | 2420477    | 3         | 0.126792 |

|              |           |   |         |   |          |
|--------------|-----------|---|---------|---|----------|
| rs2296442    | PLCH2     | 1 | 2420477 | 8 | 2.264457 |
| rs2296442    | PLCH2     | 1 | 2420477 | 1 | 1.130557 |
| rs2296442    | PLCH2     | 1 | 2420477 | 6 | 3.462337 |
| rs2296442    | PLCH2     | 1 | 2420477 | 2 | 0.280803 |
| rs2296442    | PLCH2     | 1 | 2420477 | 4 | 0.49238  |
| rs2494620    | PANK4     | 1 | 2431218 | 7 | 0.613003 |
| rs2494620    | PANK4     | 1 | 2431218 | 2 | 0.741784 |
| rs2494620    | PANK4     | 1 | 2431218 | 1 | 0.560575 |
| SNP1-2486265 | TNFRSF14  | 1 | 2486265 | 8 | 0.282896 |
| SNP1-2486265 | TNFRSF14  | 1 | 2486265 | 2 | 0.782545 |
| SNP1-2486265 | TNFRSF14  | 1 | 2486265 | 5 | 0.994711 |
| SNP1-2486265 | TNFRSF14  | 1 | 2486265 | 3 | 1.141057 |
| SNP1-2516606 | MMEL1     | 1 | 2516606 | 6 | 1.836374 |
| SNP1-2516606 | MMEL1     | 1 | 2516606 | 5 | 5.181309 |
| SNP1-2516606 | MMEL1     | 1 | 2516606 | 4 | 0.264026 |
| SNP1-2525473 | MMEL1     | 1 | 2525473 | 6 | 2.070887 |
| SNP1-2525473 | MMEL1     | 1 | 2525473 | 5 | 2.327321 |
| SNP1-2525473 | MMEL1     | 1 | 2525473 | 2 | 3.078952 |
| rs4576609    | ACTRT2    | 1 | 2928125 | 6 | 0.285804 |
| rs4576609    | ACTRT2    | 1 | 2928125 | 7 | 0.619722 |
| rs4576609    | ACTRT2    | 1 | 2928125 | 3 | 0.509031 |
| rs4576609    | ACTRT2    | 1 | 2928125 | 2 | 0.869806 |
| rs3795262    | ACTRT2    | 1 | 2928557 | 3 | 0.649376 |
| rs3795262    | ACTRT2    | 1 | 2928557 | 7 | 1.309358 |
| rs3795263    | ACTRT2    | 1 | 2928849 | 1 | 0.626988 |
| rs3795263    | ACTRT2    | 1 | 2928849 | 3 | 0.019215 |
| rs2236518    | PRDM16    | 1 | 3342732 | 5 | 1.093587 |
| rs2236518    | PRDM16    | 1 | 3342732 | 4 | 0.050629 |
| rs2821039    | MEGF6     | 1 | 3396867 | 1 | 4.02201  |
| SNP1-3400270 | MEGF6     | 1 | 3400270 | 1 | 4.186529 |
| rs7553399    | MEGF6     | 1 | 3406309 | 1 | 2.717446 |
| rs7553399    | MEGF6     | 1 | 3406309 | 5 | 0.385063 |
| SNP1-3407071 | MEGF6     | 1 | 3407071 | 4 | 0.626121 |
| SNP1-3407071 | MEGF6     | 1 | 3407071 | 1 | 3.854645 |
| SNP1-3414248 | MEGF6     | 1 | 3414248 | 4 | 5.318592 |
| SNP1-3414248 | MEGF6     | 1 | 3414248 | 1 | 6.033573 |
| SNP1-3418468 | MEGF6     | 1 | 3418468 | 1 | 5.934405 |
| SNP1-3418468 | MEGF6     | 1 | 3418468 | 4 | 1.779521 |
| SNP1-3501794 | MEGF6     | 1 | 3501794 | 3 | 0.639749 |
| rs2296034    | WDR8      | 1 | 3541652 | 2 | 4.942978 |
| rs1801174    | TP73      | 1 | 3628534 | 6 | 0.812858 |
| rs3903158    | KIAA0495  | 1 | 3645396 | 2 | 5.035084 |
| rs2298223    | KIAA0495  | 1 | 3649602 | 2 | 3.974553 |
| rs2275819    | LOC388588 | 1 | 3679268 | 7 | 0.108005 |
| rs2275831    | KIAA0562  | 1 | 3735784 | 2 | 5.216241 |
| rs2275822    | KIAA0562  | 1 | 3751339 | 1 | 2.257394 |
| rs2275822    | KIAA0562  | 1 | 3751339 | 3 | 0.144909 |

|              |        |   |         |   |          |
|--------------|--------|---|---------|---|----------|
| rs1061968    | AJAP1  | 1 | 4671913 | 7 | 0.915112 |
| rs389959     | AJAP1  | 1 | 4734466 | 1 | 0.963731 |
| rs389959     | AJAP1  | 1 | 4734466 | 5 | 0.796145 |
| rs41280800   | NPHP4  | 1 | 5855971 | 7 | 0.930259 |
| rs1287637    | NPHP4  | 1 | 5857749 | 7 | 1.484777 |
| rs1287637    | NPHP4  | 1 | 5857749 | 8 | 1.721133 |
| rs3747992    | NPHP4  | 1 | 5859755 | 3 | 0.872454 |
| rs3747992    | NPHP4  | 1 | 5859755 | 6 | 0.034682 |
| rs3747992    | NPHP4  | 1 | 5859755 | 4 | 2.362749 |
| rs3747992    | NPHP4  | 1 | 5859755 | 5 | 0.6942   |
| rs3747992    | NPHP4  | 1 | 5859755 | 7 | 3.658478 |
| rs3747992    | NPHP4  | 1 | 5859755 | 8 | 11.32615 |
| rs3747990    | NPHP4  | 1 | 5859914 | 3 | 0.591589 |
| rs12120967   | NPHP4  | 1 | 5887968 | 3 | 0.156201 |
| rs3205229    | KCNAB2 | 1 | 6081149 | 7 | 0.742856 |
| rs3205229    | KCNAB2 | 1 | 6081149 | 4 | 0.020627 |
| rs3205229    | KCNAB2 | 1 | 6081149 | 3 | 0.856258 |
| rs3205229    | KCNAB2 | 1 | 6081149 | 1 | 0.311402 |
| rs3827728    | CHD5   | 1 | 6084994 | 5 | 0.936373 |
| rs3827728    | CHD5   | 1 | 6084994 | 6 | 1.270992 |
| rs3827728    | CHD5   | 1 | 6084994 | 8 | 0.227351 |
| rs3810993    | CHD5   | 1 | 6085170 | 7 | 0.57242  |
| rs3810993    | CHD5   | 1 | 6085170 | 3 | 0.11855  |
| rs3810990    | CHD5   | 1 | 6085232 | 3 | 1.337288 |
| rs11587      | CHD5   | 1 | 6085728 | 7 | 0.108682 |
| rs11587      | CHD5   | 1 | 6085728 | 2 | 4.499495 |
| rs2092507    | CHD5   | 1 | 6086995 | 5 | 2.554026 |
| rs1883768    | CHD5   | 1 | 6088006 | 3 | 1.750109 |
| rs1883768    | CHD5   | 1 | 6088006 | 1 | 3.660076 |
| SNP1-6106679 | CHD5   | 1 | 6106679 | 8 | 0.422417 |
| SNP1-6106679 | CHD5   | 1 | 6106679 | 7 | 0.448981 |
| SNP1-6106679 | CHD5   | 1 | 6106679 | 1 | 1.184947 |
| rs2250358    | CHD5   | 1 | 6119456 | 7 | 5.172811 |
| rs2250358    | CHD5   | 1 | 6119456 | 8 | 0.030451 |
| rs2250358    | CHD5   | 1 | 6119456 | 1 | 0.794542 |
| rs2250358    | CHD5   | 1 | 6119456 | 6 | 1.508407 |
| rs2273032    | CHD5   | 1 | 6124832 | 1 | 3.42943  |
| rs2273032    | CHD5   | 1 | 6124832 | 3 | 0.908387 |
| rs17436816   | CHD5   | 1 | 6126748 | 2 | 3.523067 |
| rs12074369   | CHD5   | 1 | 6138323 | 6 | 0.4445   |
| rs4908540    | RNF207 | 1 | 6188683 | 5 | 0.33243  |
| SNP1-6195793 | RNF207 | 1 | 6195793 | 6 | 0.396878 |
| rs846111     | NULL   | 1 | 6201957 | 5 | 1.109897 |
| rs846111     | NULL   | 1 | 6201957 | 3 | 2.018877 |
| rs846111     | NULL   | 1 | 6201957 | 2 | 2.489437 |
| rs1802353    | ICMT   | 1 | 6207267 | 6 | 4.925378 |
| SNP1-6236525 | GPR153 | 1 | 6236525 | 5 | 0.456303 |

|              |          |   |         |   |          |
|--------------|----------|---|---------|---|----------|
| SNP1-6236525 | GPR153   | 1 | 6236525 | 7 | 0.37633  |
| SNP1-6236525 | GPR153   | 1 | 6236525 | 4 | 1.0002   |
| SNP1-6236525 | GPR153   | 1 | 6236525 | 2 | 0.699331 |
| rs11590458   | GPR153   | 1 | 6237409 | 2 | 3.849214 |
| rs11590458   | GPR153   | 1 | 6237409 | 4 | 0.241895 |
| rs11590458   | GPR153   | 1 | 6237409 | 5 | 5.514804 |
| rs11800462   | TNFRSF25 | 1 | 6447088 | 6 | 1.954419 |
| SNP1-6451055 | PLEKHG5  | 1 | 6451055 | 8 | 0.258739 |
| GA000154     | PLEKHG5  | 1 | 6451775 | 8 | 6.042107 |
| GA000154     | PLEKHG5  | 1 | 6451775 | 6 | 8.352664 |
| rs1556035    | PLEKHG5  | 1 | 6502194 | 1 | 0.041026 |
| rs1556035    | PLEKHG5  | 1 | 6502194 | 7 | 0.014908 |
| rs1010584    | PLEKHG5  | 1 | 6502430 | 7 | 0.740775 |
| rs1010584    | PLEKHG5  | 1 | 6502430 | 1 | 0.485673 |
| rs4908923    | NOL9     | 1 | 6537122 | 2 | 0.392673 |
| rs4908923    | NOL9     | 1 | 6537122 | 1 | 0.567503 |
| rs17029626   | ZBTB48   | 1 | 6562703 | 6 | 1.058335 |
| rs17029626   | ZBTB48   | 1 | 6562703 | 4 | 0.081791 |
| rs12727844   | THAP3    | 1 | 6616794 | 3 | 0.776403 |
| rs12727844   | THAP3    | 1 | 6616794 | 7 | 0.814923 |
| rs12727844   | THAP3    | 1 | 6616794 | 1 | 3.226297 |
| rs200458     | DNAJC11  | 1 | 6627222 | 4 | 0.097287 |
| rs12137794   | DNAJC11  | 1 | 6628531 | 1 | 4.377498 |
| rs1044245    | CAMTA1   | 1 | 7751694 | 3 | 0.34843  |
| rs1044245    | CAMTA1   | 1 | 7751694 | 4 | 0.08396  |
| rs17031614   | PER3     | 1 | 7810192 | 6 | 5.064187 |
| rs2640908    | PER3     | 1 | 7812528 | 5 | 0.144008 |
| rs2640908    | PER3     | 1 | 7812528 | 2 | 5.539337 |
| rs13306061   | UTS2     | 1 | 7836032 | 3 | 0.559651 |
| rs2289731    | SLC45A1  | 1 | 8313475 | 1 | 1.189276 |
| rs2289731    | SLC45A1  | 1 | 8313475 | 8 | 1.254287 |
| rs2289731    | SLC45A1  | 1 | 8313475 | 3 | 1.054156 |
| rs7535752    | SLC45A1  | 1 | 8318147 | 1 | 6.462673 |
| rs7535752    | SLC45A1  | 1 | 8318147 | 3 | 0.832789 |
| rs5840       | SLC2A5   | 1 | 9019828 | 6 | 0.213875 |
| rs5840       | SLC2A5   | 1 | 9019828 | 2 | 2.863323 |
| rs5840       | SLC2A5   | 1 | 9019828 | 5 | 1.110569 |
| rs5840       | SLC2A5   | 1 | 9019828 | 3 | 0.261001 |
| rs1063137    | SLC2A5   | 1 | 9019838 | 5 | 1.204296 |
| rs1063137    | SLC2A5   | 1 | 9019838 | 6 | 0.52127  |
| rs1063137    | SLC2A5   | 1 | 9019838 | 3 | 0.474811 |
| rs1063137    | SLC2A5   | 1 | 9019838 | 8 | 1.787547 |
| SNP1-9088272 | GPR157   | 1 | 9088272 | 5 | 0.418322 |
| SNP1-9088272 | GPR157   | 1 | 9088272 | 3 | 0.174712 |
| SNP1-9088272 | GPR157   | 1 | 9088272 | 4 | 0.167992 |
| SNP1-9088272 | GPR157   | 1 | 9088272 | 8 | 4.373002 |
| rs6688832    | H6PD     | 1 | 9246497 | 3 | 0.349709 |

|               |           |   |          |   |          |
|---------------|-----------|---|----------|---|----------|
| rs1294014     | H6PD      | 1 | 9248263  | 8 | 3.573358 |
| rs1294014     | H6PD      | 1 | 9248263  | 4 | 1.900095 |
| rs1294014     | H6PD      | 1 | 9248263  | 5 | 0.643024 |
| rs1294014     | H6PD      | 1 | 9248263  | 2 | 4.805674 |
| rs1294014     | H6PD      | 1 | 9248263  | 3 | 0.613023 |
| rs11121356    | H6PD      | 1 | 9253066  | 2 | 7.299106 |
| rs1135426     | PIK3CD    | 1 | 9710095  | 7 | 1.002787 |
| rs1135427     | PIK3CD    | 1 | 9710427  | 7 | 1.051177 |
| rs1135427     | PIK3CD    | 1 | 9710427  | 8 | 0.893924 |
| rs1135427     | PIK3CD    | 1 | 9710427  | 1 | 0.773466 |
| rs1135427     | PIK3CD    | 1 | 9710427  | 2 | 1.200854 |
| rs1135427     | PIK3CD    | 1 | 9710427  | 4 | 1.467575 |
| rs1135427     | PIK3CD    | 1 | 9710427  | 3 | 0.90995  |
| rs1220394     | CTNNBIP1  | 1 | 9832093  | 3 | 0.719937 |
| rs2297881     | KIF1B     | 1 | 10320154 | 5 | 0.8805   |
| SNP1-10395787 | PGD       | 1 | 10395787 | 5 | 5.615436 |
| rs649639      | APITD1    | 1 | 10412872 | 5 | 1.407382 |
| rs649639      | APITD1    | 1 | 10412872 | 1 | 1.3426   |
| rs649639      | APITD1    | 1 | 10412872 | 6 | 1.45235  |
| rs1307497     | APITD1    | 1 | 10434643 | 6 | 0.22575  |
| rs284322      | CASZ1     | 1 | 10648085 | 6 | 8.546347 |
| rs284322      | CASZ1     | 1 | 10648085 | 4 | 0.945104 |
| SNP1-10936705 | C1orf127  | 1 | 10936705 | 3 | 1.503024 |
| SNP1-10936705 | C1orf127  | 1 | 10936705 | 7 | 1.186139 |
| SNP1-10936705 | C1orf127  | 1 | 10936705 | 6 | 1.053228 |
| SNP1-10936705 | C1orf127  | 1 | 10936705 | 2 | 1.691893 |
| rs28991014    | ANGPTL7   | 1 | 11177825 | 6 | 0.390171 |
| SNP1-11483751 | PTCHD2    | 1 | 11483751 | 5 | 1.456953 |
| rs2817580     | PTCHD2    | 1 | 11484180 | 5 | 0.93806  |
| rs2594310     | PTCHD2    | 1 | 11519042 | 5 | 0.545331 |
| rs2745294     | PTCHD2    | 1 | 11519499 | 5 | 1.444469 |
| rs1063301     | FBXO6     | 1 | 11656636 | 7 | 0.80131  |
| rs1063301     | FBXO6     | 1 | 11656636 | 5 | 0.180031 |
| rs1063301     | FBXO6     | 1 | 11656636 | 4 | 1.164733 |
| rs1063301     | FBXO6     | 1 | 11656636 | 3 | 0.09728  |
| rs4845881     | C1orf167  | 1 | 11750906 | 1 | 0.390856 |
| rs4845881     | C1orf167  | 1 | 11750906 | 5 | 0.59242  |
| rs1537516     | MTHFR     | 1 | 11770448 | 6 | 6.129332 |
| rs198411      | CLCN6     | 1 | 11822972 | 5 | 7.877903 |
| rs5068        | NPPA      | 1 | 11828561 | 6 | 1.693825 |
| rs5067        | NPPA      | 1 | 11828568 | 5 | 1.080513 |
| rs5065        | NPPA      | 1 | 11828655 | 5 | 1.262609 |
| rs4846067     | LOC390997 | 1 | 11862853 | 5 | 0.420124 |
| rs6684539     | RNU5E     | 1 | 11890860 | 7 | 1.465174 |
| rs6684539     | RNU5E     | 1 | 11890860 | 6 | 1.1198   |
| rs6684539     | RNU5E     | 1 | 11890860 | 1 | 0.975792 |
| rs7551175     | PLOD1     | 1 | 11932543 | 4 | 1.062118 |

|               |          |   |          |   |          |
|---------------|----------|---|----------|---|----------|
| rs2273285     | PLOD1    | 1 | 11933056 | 4 | 6.18981  |
| rs7514577     | PLOD1    | 1 | 11946822 | 1 | 3.239286 |
| rs7514577     | PLOD1    | 1 | 11946822 | 5 | 0.128403 |
| rs7514577     | PLOD1    | 1 | 11946822 | 3 | 0.159054 |
| rs7514577     | PLOD1    | 1 | 11946822 | 4 | 0.037663 |
| rs945439      | TNFRSF1B | 1 | 12171529 | 6 | 0.213683 |
| rs945439      | TNFRSF1B | 1 | 12171529 | 2 | 1.491504 |
| rs945439      | TNFRSF1B | 1 | 12171529 | 4 | 1.487447 |
| rs945439      | TNFRSF1B | 1 | 12171529 | 8 | 1.690851 |
| rs1061628     | TNFRSF1B | 1 | 12190586 | 8 | 2.609024 |
| rs1061628     | TNFRSF1B | 1 | 12190586 | 4 | 1.687961 |
| rs5746073     | TNFRSF1B | 1 | 12191224 | 3 | 1.702549 |
| rs5746073     | TNFRSF1B | 1 | 12191224 | 1 | 5.0464   |
| rs4845898     | VPS13D   | 1 | 12262206 | 3 | 0.099478 |
| rs4845898     | VPS13D   | 1 | 12262206 | 1 | 7.540184 |
| rs4845898     | VPS13D   | 1 | 12262206 | 5 | 5.213334 |
| rs2295338     | VPS13D   | 1 | 12352198 | 8 | 7.483558 |
| rs3000859     | AADAACL3 | 1 | 12698931 | 1 | 2.030772 |
| SNP1-12702205 | AADAACL3 | 1 | 12702205 | 4 | 2.099899 |
| rs11121969    | AADAACL3 | 1 | 12708336 | 2 | 1.507744 |
| rs355025      | PDPN     | 1 | 13783004 | 3 | 3.012375 |
| rs2495061     | PRDM2    | 1 | 13904319 | 1 | 0.212518 |
| rs2495061     | PRDM2    | 1 | 13904319 | 3 | 0.028389 |
| rs3795753     | PRDM2    | 1 | 13904343 | 2 | 4.423692 |
| rs3795753     | PRDM2    | 1 | 13904343 | 1 | 0.634532 |
| rs3795753     | PRDM2    | 1 | 13904343 | 3 | 7.342802 |
| rs17393663    | PRDM2    | 1 | 13904402 | 7 | 0.693236 |
| rs17393663    | PRDM2    | 1 | 13904402 | 1 | 4.904305 |
| rs1046331     | PRDM2    | 1 | 14015590 | 2 | 4.126556 |
| rs3820012     | PRDM2    | 1 | 14022725 | 8 | 7.457534 |
| rs2697962     | PRDM2    | 1 | 14023579 | 2 | 5.071482 |
| rs1055412     | NULL     | 1 | 15313862 | 1 | 3.14845  |
| rs1055412     | NULL     | 1 | 15313862 | 7 | 0.311785 |
| rs910105      | NULL     | 1 | 15314513 | 5 | 0.98457  |
| rs910105      | NULL     | 1 | 15314513 | 1 | 5.402727 |
| rs910105      | NULL     | 1 | 15314513 | 7 | 0.044273 |
| rs2235789     | NULL     | 1 | 15314645 | 8 | 2.693133 |
| rs2235789     | NULL     | 1 | 15314645 | 5 | 0.30497  |
| rs2235789     | NULL     | 1 | 15314645 | 1 | 3.84175  |
| rs1476356     | C1orf126 | 1 | 15315955 | 5 | 6.072625 |
| rs2235787     | C1orf126 | 1 | 15316063 | 8 | 0.18528  |
| rs2235787     | C1orf126 | 1 | 15316063 | 1 | 5.799003 |
| rs2235787     | C1orf126 | 1 | 15316063 | 7 | 0.46491  |
| rs2235786     | C1orf126 | 1 | 15316446 | 5 | 0.160726 |
| rs2235786     | C1orf126 | 1 | 15316446 | 7 | 0.443091 |
| rs2235786     | C1orf126 | 1 | 15316446 | 1 | 4.656317 |
| rs2235783     | NULL     | 1 | 15317074 | 1 | 2.889704 |

|               |           |   |          |   |          |
|---------------|-----------|---|----------|---|----------|
| rs2235783     | NULL      | 1 | 15317074 | 7 | 0.289691 |
| rs3753318     | TMEM51    | 1 | 15413985 | 8 | 0.497947 |
| rs3753318     | TMEM51    | 1 | 15413985 | 7 | 1.021792 |
| rs3753318     | TMEM51    | 1 | 15413985 | 4 | 0.376223 |
| rs3753315     | TMEM51    | 1 | 15413999 | 8 | 4.735782 |
| rs3753315     | TMEM51    | 1 | 15413999 | 4 | 3.103173 |
| rs3753315     | TMEM51    | 1 | 15413999 | 7 | 3.361575 |
| rs10489962    | FHAD1     | 1 | 15512168 | 3 | 0.993213 |
| rs3765357     | FHAD1     | 1 | 15526150 | 6 | 0.227377 |
| rs12126178    | FHAD1     | 1 | 15540906 | 1 | 0.592496 |
| rs4661330     | FHAD1     | 1 | 15559646 | 3 | 1.667516 |
| rs4661330     | FHAD1     | 1 | 15559646 | 5 | 0.590645 |
| rs4661330     | FHAD1     | 1 | 15559646 | 6 | 0.115749 |
| rs2294490     | FHAD1     | 1 | 15596430 | 5 | 0.556205 |
| rs2294490     | FHAD1     | 1 | 15596430 | 4 | 0.591557 |
| rs3820071     | ELA2B     | 1 | 15681354 | 1 | 5.154461 |
| rs3766160     | ELA2B     | 1 | 15681459 | 1 | 4.761135 |
| rs4645983     | CASP9     | 1 | 15723190 | 1 | 4.333454 |
| rs9298        | DNAJC16   | 1 | 15769607 | 1 | 4.438204 |
| rs6700212     | AGMAT     | 1 | 15771843 | 5 | 0.176851 |
| rs16851855    | LOC645317 | 1 | 15803456 | 1 | 4.885599 |
| rs16851855    | LOC645317 | 1 | 15803456 | 8 | 2.474328 |
| rs16851855    | LOC645317 | 1 | 15803456 | 5 | 3.385616 |
| rs848209      | SPEN      | 1 | 16128594 | 7 | 3.871632 |
| rs848209      | SPEN      | 1 | 16128594 | 3 | 0.195976 |
| rs848209      | SPEN      | 1 | 16128594 | 6 | 6.502294 |
| rs1763617     | C1orf64   | 1 | 16203403 | 3 | 0.354202 |
| rs872222      | HSPB7     | 1 | 16217251 | 3 | 0.403403 |
| rs945419      | HSPB7     | 1 | 16217445 | 7 | 0.451846 |
| rs1805152     | CLCNKA    | 1 | 16229088 | 7 | 0.030219 |
| SNP1-16250587 | CLCNKB    | 1 | 16250587 | 6 | 0.879915 |
| SNP1-16250587 | CLCNKB    | 1 | 16250587 | 4 | 0.189997 |
| rs5252        | CLCNKB    | 1 | 16250802 | 6 | 0.559994 |
| rs3754334     | EPHA2     | 1 | 16324354 | 1 | 3.247263 |
| rs221058      | ARHGEF19  | 1 | 16407233 | 5 | 0.730015 |
| rs221058      | ARHGEF19  | 1 | 16407233 | 8 | 0.813544 |
| rs525409      | SPATA21   | 1 | 16604097 | 5 | 0.079197 |
| rs525409      | SPATA21   | 1 | 16604097 | 6 | 3.558236 |
| rs525409      | SPATA21   | 1 | 16604097 | 8 | 0.132463 |
| rs525409      | SPATA21   | 1 | 16604097 | 1 | 4.528803 |
| rs157248      | NULL      | 1 | 16690264 | 7 | 0.372418 |
| rs157248      | NULL      | 1 | 16690264 | 1 | 0.51263  |
| rs15786       | ATP13A2   | 1 | 17185179 | 3 | 0.149514 |
| rs2235926     | PADI2     | 1 | 17267868 | 5 | 6.405509 |
| rs2235926     | PADI2     | 1 | 17267868 | 8 | 6.951801 |
| rs2235926     | PADI2     | 1 | 17267868 | 3 | 0.220655 |
| rs11581590    | PADI2     | 1 | 17269179 | 4 | 7.520936 |

|            |           |   |          |   |          |
|------------|-----------|---|----------|---|----------|
| rs11203297 | PADI2     | 1 | 17291611 | 3 | 0.10278  |
| rs11203297 | PADI2     | 1 | 17291611 | 5 | 0.589666 |
| rs3750300  | PADI3     | 1 | 17458721 | 1 | 2.361665 |
| rs2272629  | PADI3     | 1 | 17465903 | 1 | 4.407513 |
| rs2293916  | PADI3     | 1 | 17470242 | 4 | 0.474505 |
| rs2293916  | PADI3     | 1 | 17470242 | 1 | 3.202615 |
| rs16824888 | PADI3     | 1 | 17482332 | 3 | 0.029418 |
| rs16824888 | PADI3     | 1 | 17482332 | 6 | 0.111399 |
| rs2977301  | PADI3     | 1 | 17483189 | 1 | 5.993486 |
| rs2977301  | PADI3     | 1 | 17483189 | 6 | 1.160261 |
| rs2977301  | PADI3     | 1 | 17483189 | 8 | 1.225598 |
| rs2977301  | PADI3     | 1 | 17483189 | 3 | 1.293472 |
| rs11203367 | PADI4     | 1 | 17530203 | 1 | 0.337036 |
| rs11203367 | PADI4     | 1 | 17530203 | 7 | 0.31164  |
| rs11203367 | PADI4     | 1 | 17530203 | 6 | 0.083023 |
| rs1748020  | PADI4     | 1 | 17541196 | 3 | 0.169879 |
| rs2240335  | PADI4     | 1 | 17547124 | 8 | 0.737055 |
| rs2240335  | PADI4     | 1 | 17547124 | 1 | 2.237063 |
| rs2240335  | PADI4     | 1 | 17547124 | 7 | 0.680732 |
| rs2240335  | PADI4     | 1 | 17547124 | 5 | 0.52354  |
| rs2526830  | PADI6     | 1 | 17600706 | 3 | 1.46642  |
| rs2526830  | PADI6     | 1 | 17600706 | 1 | 1.841738 |
| rs2526830  | PADI6     | 1 | 17600706 | 5 | 0.134216 |
| rs2526830  | PADI6     | 1 | 17600706 | 8 | 0.622884 |
| rs942457   | RCC2      | 1 | 17612173 | 3 | 0.703953 |
| rs942457   | RCC2      | 1 | 17612173 | 8 | 4.756512 |
| rs942457   | RCC2      | 1 | 17612173 | 1 | 1.137725 |
| rs942457   | RCC2      | 1 | 17612173 | 2 | 0.577664 |
| rs2270976  | ARHGEF10L | 1 | 17896277 | 3 | 1.051712 |
| rs2270976  | ARHGEF10L | 1 | 17896277 | 7 | 0.093111 |
| rs2270976  | ARHGEF10L | 1 | 17896277 | 1 | 5.093054 |
| rs2296035  | ACTL8     | 1 | 18022153 | 3 | 0.055588 |
| rs1043459  | IGSF21    | 1 | 18577449 | 3 | 0.21709  |
| rs7528572  | KLHDC7A   | 1 | 18680656 | 4 | 1.045281 |
| rs7528572  | KLHDC7A   | 1 | 18680656 | 2 | 2.314214 |
| rs7528572  | KLHDC7A   | 1 | 18680656 | 1 | 2.583205 |
| rs2992753  | KLHDC7A   | 1 | 18680879 | 1 | 2.756491 |
| rs2992745  | KLHDC7A   | 1 | 18682483 | 1 | 4.282732 |
| rs2992745  | KLHDC7A   | 1 | 18682483 | 5 | 0.431151 |
| rs2992745  | KLHDC7A   | 1 | 18682483 | 8 | 0.35565  |
| rs2992745  | KLHDC7A   | 1 | 18682483 | 3 | 1.370865 |
| rs12061708 | KLHDC7A   | 1 | 18682503 | 3 | 0.159474 |
| rs12061708 | KLHDC7A   | 1 | 18682503 | 4 | 1.573685 |
| rs2076020  | PAX7      | 1 | 18890992 | 5 | 0.880869 |
| rs1140477  | ALDH4A1   | 1 | 19071001 | 4 | 0.571209 |
| rs1140477  | ALDH4A1   | 1 | 19071001 | 1 | 3.475784 |
| rs1140477  | ALDH4A1   | 1 | 19071001 | 5 | 0.226308 |



|            |          |   |          |   |          |
|------------|----------|---|----------|---|----------|
| rs1140477  | ALDH4A1  | 1 | 19071001 | 7 | 0.233182 |
| rs11740    | ALDH4A1  | 1 | 19071808 | 6 | 1.603303 |
| rs11740    | ALDH4A1  | 1 | 19071808 | 2 | 1.887004 |
| rs11740    | ALDH4A1  | 1 | 19071808 | 1 | 1.123495 |
| rs11740    | ALDH4A1  | 1 | 19071808 | 3 | 0.844441 |
| rs11740    | ALDH4A1  | 1 | 19071808 | 4 | 2.134539 |
| GA018627   | ALDH4A1  | 1 | 19073575 | 4 | 4.395048 |
| rs2230709  | ALDH4A1  | 1 | 19074515 | 2 | 5.71275  |
| rs2230709  | ALDH4A1  | 1 | 19074515 | 5 | 0.380276 |
| rs2230709  | ALDH4A1  | 1 | 19074515 | 6 | 6.926505 |
| GA018629   | ALDH4A1  | 1 | 19075513 | 2 | 4.457767 |
| GA018629   | ALDH4A1  | 1 | 19075513 | 6 | 0.559996 |
| GA018629   | ALDH4A1  | 1 | 19075513 | 4 | 0.176644 |
| GA018629   | ALDH4A1  | 1 | 19075513 | 3 | 0.366604 |
| GA018629   | ALDH4A1  | 1 | 19075513 | 5 | 1.212659 |
| rs12584    | UBR4     | 1 | 19285848 | 5 | 0.032704 |
| rs709682   | KIAA0090 | 1 | 19437925 | 6 | 0.155449 |
| rs709683   | KIAA0090 | 1 | 19437931 | 3 | 0.37915  |
| rs709683   | KIAA0090 | 1 | 19437931 | 5 | 0.298282 |
| rs709683   | KIAA0090 | 1 | 19437931 | 2 | 7.700951 |
| rs1042380  | MRT04    | 1 | 19456591 | 5 | 0.411329 |
| rs7527253  | AFAR3    | 1 | 19465786 | 5 | 0.943574 |
| rs41264079 | PQLC2    | 1 | 19525461 | 7 | 0.695864 |
| rs41264079 | PQLC2    | 1 | 19525461 | 6 | 0.376372 |
| rs1534985  | C1orf151 | 1 | 19825705 | 3 | 1.399404 |
| rs1534985  | C1orf151 | 1 | 19825705 | 4 | 0.165891 |
| rs2281237  | C1orf151 | 1 | 19825752 | 8 | 0.315838 |
| rs11804596 | C1orf151 | 1 | 19825919 | 6 | 3.483369 |
| rs11804596 | C1orf151 | 1 | 19825919 | 1 | 4.802949 |
| rs880554   | C1orf151 | 1 | 19826601 | 4 | 0.771646 |
| rs3820317  | RNF186   | 1 | 20013168 | 5 | 0.32827  |
| rs1541185  | RNF186   | 1 | 20014115 | 2 | 1.613635 |
| rs1541185  | RNF186   | 1 | 20014115 | 1 | 0.547109 |
| rs1541185  | RNF186   | 1 | 20014115 | 6 | 0.175632 |
| rs1541185  | RNF186   | 1 | 20014115 | 5 | 0.204814 |
| rs10916668 | OTUD3    | 1 | 20105673 | 2 | 4.482268 |
| rs10916668 | OTUD3    | 1 | 20105673 | 5 | 0.242109 |
| rs17401735 | OTUD3    | 1 | 20109318 | 4 | 0.637468 |
| rs17401735 | OTUD3    | 1 | 20109318 | 3 | 0.794779 |
| rs17401735 | OTUD3    | 1 | 20109318 | 5 | 0.821644 |
| rs10492999 | OTUD3    | 1 | 20110347 | 2 | 0.358191 |
| rs10492999 | OTUD3    | 1 | 20110347 | 5 | 1.492299 |
| rs3738122  | OTUD3    | 1 | 20111447 | 5 | 0.172324 |
| rs3738122  | OTUD3    | 1 | 20111447 | 1 | 5.189124 |
| rs3738122  | OTUD3    | 1 | 20111447 | 7 | 0.717645 |
| rs3738122  | OTUD3    | 1 | 20111447 | 6 | 4.30606  |
| rs3738122  | OTUD3    | 1 | 20111447 | 3 | 1.239172 |

|               |           |   |          |   |          |
|---------------|-----------|---|----------|---|----------|
| rs4744        | PLA2G2A   | 1 | 20177513 | 7 | 1.304448 |
| rs2020887     | PLA2G5    | 1 | 20283919 | 3 | 0.140095 |
| rs617180      | PLA2G2D   | 1 | 20311900 | 5 | 0.68187  |
| rs578459      | PLA2G2D   | 1 | 20312109 | 3 | 1.783592 |
| rs578459      | PLA2G2D   | 1 | 20312109 | 5 | 0.015322 |
| rs584367      | PLA2G2D   | 1 | 20314641 | 3 | 1.062416 |
| rs6426616     | PLA2G2C   | 1 | 20363105 | 4 | 1.730022 |
| rs1044332     | C1orf166  | 1 | 20698830 | 1 | 4.921462 |
| rs1044332     | C1orf166  | 1 | 20698830 | 3 | 1.391557 |
| rs1044332     | C1orf166  | 1 | 20698830 | 6 | 6.073717 |
| rs529974      | C1orf166  | 1 | 20699497 | 1 | 4.055173 |
| rs476622      | LOC441878 | 1 | 20725782 | 3 | 0.009975 |
| rs3795509     | FAM43B    | 1 | 20753896 | 3 | 0.174209 |
| rs3795509     | FAM43B    | 1 | 20753896 | 6 | 0.264729 |
| rs8064        | PINK1     | 1 | 20850186 | 5 | 0.308284 |
| rs8064        | PINK1     | 1 | 20850186 | 8 | 5.472235 |
| rs10799659    | KIF17     | 1 | 20863492 | 3 | 0.186187 |
| rs631357      | KIF17     | 1 | 20865406 | 5 | 0.226463 |
| rs2296225     | KIF17     | 1 | 20903629 | 8 | 1.943909 |
| rs2296225     | KIF17     | 1 | 20903629 | 1 | 1.54073  |
| rs671905      | SH2D5     | 1 | 20919679 | 3 | 0.154433 |
| rs671905      | SH2D5     | 1 | 20919679 | 6 | 2.674759 |
| rs671905      | SH2D5     | 1 | 20919679 | 1 | 0.456148 |
| rs671905      | SH2D5     | 1 | 20919679 | 4 | 1.178008 |
| rs671905      | SH2D5     | 1 | 20919679 | 2 | 0.164596 |
| rs659046      | SH2D5     | 1 | 20920312 | 1 | 1.196462 |
| rs659046      | SH2D5     | 1 | 20920312 | 4 | 0.934321 |
| rs659046      | SH2D5     | 1 | 20920312 | 6 | 1.626081 |
| rs659046      | SH2D5     | 1 | 20920312 | 3 | 1.128819 |
| rs12729575    | HP1BP3    | 1 | 20948861 | 5 | 8.693596 |
| rs6423191     | LOC728969 | 1 | 21630456 | 2 | 4.800872 |
| rs6423191     | LOC728969 | 1 | 21630456 | 1 | 5.413627 |
| rs6423191     | LOC728969 | 1 | 21630456 | 7 | 5.476861 |
| rs6423191     | LOC728969 | 1 | 21630456 | 6 | 4.744007 |
| rs6423191     | LOC728969 | 1 | 21630456 | 4 | 3.896804 |
| rs6423191     | LOC728969 | 1 | 21630456 | 3 | 5.418481 |
| rs6423191     | LOC728969 | 1 | 21630456 | 5 | 3.389314 |
| rs1827293     | NBPF3     | 1 | 21667975 | 4 | 0.16101  |
| rs1780316     | ALPL      | 1 | 21762222 | 6 | 1.726337 |
| SNP1-21776718 | ALPL      | 1 | 21776718 | 4 | 0.362702 |
| SNP1-21776718 | ALPL      | 1 | 21776718 | 2 | 2.840266 |
| SNP1-21776718 | ALPL      | 1 | 21776718 | 5 | 0.391803 |
| rs2275363     | RAP1GAP   | 1 | 21813142 | 4 | 0.377325 |
| rs2275363     | RAP1GAP   | 1 | 21813142 | 7 | 1.168595 |
| rs2275363     | RAP1GAP   | 1 | 21813142 | 5 | 0.012056 |
| rs2275363     | RAP1GAP   | 1 | 21813142 | 3 | 0.259218 |
| rs1059218     | USP48     | 1 | 21878252 | 1 | 4.301936 |

|               |           |   |          |   |          |
|---------------|-----------|---|----------|---|----------|
| rs1059218     | USP48     | 1 | 21878252 | 8 | 0.576435 |
| rs1059218     | USP48     | 1 | 21878252 | 7 | 0.060467 |
| rs17459097    | HSPG2     | 1 | 22032607 | 4 | 0.44119  |
| rs17459097    | HSPG2     | 1 | 22032607 | 8 | 0.264971 |
| rs2229482     | HSPG2     | 1 | 22071832 | 3 | 1.370281 |
| rs2254357     | HSPG2     | 1 | 22089191 | 2 | 5.506987 |
| rs2254357     | HSPG2     | 1 | 22089191 | 3 | 0.573198 |
| rs9187        | ELA3A     | 1 | 22208892 | 5 | 0.332865 |
| rs9187        | ELA3A     | 1 | 22208892 | 6 | 1.183051 |
| rs11580218    | LOC343384 | 1 | 22522074 | 5 | 1.359592 |
| rs11580218    | LOC343384 | 1 | 22522074 | 4 | 0.675043 |
| rs881646      | ZBTB40    | 1 | 22725302 | 1 | 4.800444 |
| rs881646      | ZBTB40    | 1 | 22725302 | 6 | 7.407793 |
| rs606002      | EPHA8     | 1 | 22788340 | 4 | 4.255482 |
| rs606002      | EPHA8     | 1 | 22788340 | 6 | 2.05538  |
| rs606002      | EPHA8     | 1 | 22788340 | 1 | 0.543772 |
| rs11584845    | EPHA8     | 1 | 22788554 | 3 | 0.414885 |
| rs999765      | EPHA8     | 1 | 22796460 | 5 | 0.149388 |
| rs172378      | C1QA      | 1 | 22838025 | 5 | 2.973936 |
| rs172378      | C1QA      | 1 | 22838025 | 7 | 1.639393 |
| rs172378      | C1QA      | 1 | 22838025 | 2 | 3.268515 |
| rs172378      | C1QA      | 1 | 22838025 | 6 | 3.389995 |
| rs9434        | C1QC      | 1 | 22846884 | 1 | 1.961206 |
| rs9434        | C1QC      | 1 | 22846884 | 7 | 1.513557 |
| rs9434        | C1QC      | 1 | 22846884 | 3 | 2.015237 |
| rs9434        | C1QC      | 1 | 22846884 | 5 | 1.91704  |
| rs16827981    | LUZP1     | 1 | 23308125 | 5 | 0.171512 |
| rs16827981    | LUZP1     | 1 | 23308125 | 4 | 0.354    |
| rs665977      | C1orf213  | 1 | 23568739 | 7 | 0.415316 |
| rs665977      | C1orf213  | 1 | 23568739 | 3 | 0.093292 |
| rs665977      | C1orf213  | 1 | 23568739 | 2 | 4.015175 |
| rs1198432     | DDEF1     | 1 | 23628742 | 3 | 1.691586 |
| SNP1-23633615 | DDEF1     | 1 | 23633615 | 7 | 1.455064 |
| rs3820028     | E2F2      | 1 | 23707073 | 7 | 0.921507 |
| rs3820028     | E2F2      | 1 | 23707073 | 4 | 3.986947 |
| rs3820028     | E2F2      | 1 | 23707073 | 5 | 6.11606  |
| rs2075993     | E2F2      | 1 | 23708951 | 1 | 4.845842 |
| rs2075993     | E2F2      | 1 | 23708951 | 8 | 2.030758 |
| rs2075993     | E2F2      | 1 | 23708951 | 7 | 0.698709 |
| rs2075993     | E2F2      | 1 | 23708951 | 4 | 0.508867 |
| rs2075993     | E2F2      | 1 | 23708951 | 5 | 0.697192 |
| rs2229583     | CNR2      | 1 | 24073570 | 2 | 0.750733 |
| rs2229583     | CNR2      | 1 | 24073570 | 5 | 2.727078 |
| rs2229583     | CNR2      | 1 | 24073570 | 7 | 3.380532 |
| rs12145360    | MYOM3     | 1 | 24267398 | 3 | 0.353005 |
| rs6424152     | MYOM3     | 1 | 24285746 | 3 | 0.808143 |
| rs7533060     | MYOM3     | 1 | 24288657 | 8 | 1.07089  |

|            |           |   |          |   |          |
|------------|-----------|---|----------|---|----------|
| rs7533060  | MYOM3     | 1 | 24288657 | 5 | 0.917153 |
| rs7533060  | MYOM3     | 1 | 24288657 | 3 | 0.81467  |
| rs7533060  | MYOM3     | 1 | 24288657 | 2 | 1.177427 |
| rs4276859  | MYOM3     | 1 | 24288720 | 3 | 0.516012 |
| rs6700245  | MYOM3     | 1 | 24290002 | 3 | 1.379936 |
| rs7556176  | MYOM3     | 1 | 24291355 | 3 | 0.098983 |
| rs7556176  | MYOM3     | 1 | 24291355 | 8 | 2.494904 |
| rs6678540  | MYOM3     | 1 | 24294061 | 1 | 5.423061 |
| rs6678540  | MYOM3     | 1 | 24294061 | 2 | 5.048156 |
| rs6678540  | MYOM3     | 1 | 24294061 | 5 | 3.863764 |
| rs6678540  | MYOM3     | 1 | 24294061 | 3 | 2.974855 |
| rs3795300  | IL22RA1   | 1 | 24319801 | 2 | 1.054741 |
| rs3795300  | IL22RA1   | 1 | 24319801 | 8 | 0.0573   |
| rs3795300  | IL22RA1   | 1 | 24319801 | 4 | 0.813423 |
| rs3795300  | IL22RA1   | 1 | 24319801 | 1 | 0.023202 |
| rs17852648 | IL22RA1   | 1 | 24320671 | 2 | 3.590665 |
| rs17852648 | IL22RA1   | 1 | 24320671 | 4 | 0.279085 |
| rs16829204 | IL22RA1   | 1 | 24327275 | 3 | 2.041815 |
| rs10903022 | IL22RA1   | 1 | 24337700 | 2 | 1.09917  |
| rs10903022 | IL22RA1   | 1 | 24337700 | 1 | 0.748943 |
| rs10903022 | IL22RA1   | 1 | 24337700 | 3 | 0.807881 |
| rs10903022 | IL22RA1   | 1 | 24337700 | 8 | 0.767043 |
| rs2486668  | GRHL3     | 1 | 24530650 | 1 | 6.201007 |
| rs2486668  | GRHL3     | 1 | 24530650 | 3 | 0.041802 |
| rs11576645 | GRHL3     | 1 | 24541254 | 5 | 3.803897 |
| rs11576645 | GRHL3     | 1 | 24541254 | 7 | 0.141399 |
| rs10903080 | GRHL3     | 1 | 24554228 | 7 | 0.280397 |
| rs10903080 | GRHL3     | 1 | 24554228 | 4 | 3.721804 |
| rs10903080 | GRHL3     | 1 | 24554228 | 8 | 4.889333 |
| rs12090888 | C1orf201  | 1 | 24582992 | 4 | 1.265592 |
| rs9259     | CLIC4     | 1 | 25040711 | 3 | 0.323978 |
| rs9259     | CLIC4     | 1 | 25040711 | 1 | 4.033238 |
| rs9259     | CLIC4     | 1 | 25040711 | 4 | 0.144786 |
| rs3093647  | TMEM50A   | 1 | 25542118 | 1 | 3.641243 |
| rs4537542  | LDLRAP1   | 1 | 25767864 | 8 | 9.122631 |
| rs760597   | SEPN1     | 1 | 26010849 | 6 | 6.398651 |
| rs2294226  | LOC646471 | 1 | 26019036 | 2 | 1.144683 |
| rs2294226  | LOC646471 | 1 | 26019036 | 8 | 1.853514 |
| rs2294226  | LOC646471 | 1 | 26019036 | 7 | 2.074406 |
| rs2294226  | LOC646471 | 1 | 26019036 | 1 | 0.88679  |
| rs2294226  | LOC646471 | 1 | 26019036 | 4 | 1.112406 |
| rs2294224  | LOC646471 | 1 | 26019101 | 1 | 0.45996  |
| rs2294224  | LOC646471 | 1 | 26019101 | 6 | 0.625411 |
| rs2294224  | LOC646471 | 1 | 26019101 | 4 | 6.961708 |
| rs2294224  | LOC646471 | 1 | 26019101 | 7 | 6.621912 |
| rs2294224  | LOC646471 | 1 | 26019101 | 2 | 0.187701 |
| rs213637   | PAQR7     | 1 | 26061212 | 6 | 0.15154  |

|            |          |   |          |   |          |
|------------|----------|---|----------|---|----------|
| rs213637   | PAQR7    | 1 | 26061212 | 4 | 0.453246 |
| rs213637   | PAQR7    | 1 | 26061212 | 1 | 0.581427 |
| rs213637   | PAQR7    | 1 | 26061212 | 7 | 2.831385 |
| rs159530   | C1orf215 | 1 | 26083378 | 1 | 0.573475 |
| rs159530   | C1orf215 | 1 | 26083378 | 4 | 3.063982 |
| rs159530   | C1orf215 | 1 | 26083378 | 2 | 0.292722 |
| rs159530   | C1orf215 | 1 | 26083378 | 7 | 0.456064 |
| rs213641   | STMN1    | 1 | 26104943 | 2 | 0.140312 |
| rs213641   | STMN1    | 1 | 26104943 | 5 | 0.468116 |
| rs213641   | STMN1    | 1 | 26104943 | 4 | 3.033931 |
| rs213641   | STMN1    | 1 | 26104943 | 6 | 0.132936 |
| rs213641   | STMN1    | 1 | 26104943 | 1 | 0.232891 |
| rs3008245  | EXTL1    | 1 | 26221061 | 8 | 0.97319  |
| rs11247847 | EXTL1    | 1 | 26230243 | 5 | 0.127402 |
| rs11247847 | EXTL1    | 1 | 26230243 | 7 | 0.350054 |
| rs11247848 | EXTL1    | 1 | 26230254 | 5 | 0.49013  |
| rs2802315  | EXTL1    | 1 | 26234781 | 5 | 0.277729 |
| rs2802315  | EXTL1    | 1 | 26234781 | 4 | 0.074118 |
| rs4659404  | SLC30A2  | 1 | 26237961 | 7 | 0.210442 |
| rs2997452  | SLC30A2  | 1 | 26238136 | 5 | 0.207254 |
| rs2997452  | SLC30A2  | 1 | 26238136 | 7 | 0.985606 |
| rs3748854  | GRRP1    | 1 | 26358104 | 3 | 0.604923 |
| rs3748854  | GRRP1    | 1 | 26358104 | 4 | 0.173374 |
| rs12069762 | GRRP1    | 1 | 26361534 | 5 | 1.382436 |
| rs17356937 | CNKSR1   | 1 | 26376623 | 5 | 0.302722 |
| rs1071849  | CD52     | 1 | 26519313 | 1 | 4.65024  |
| rs1071849  | CD52     | 1 | 26519313 | 3 | 3.214513 |
| rs1071849  | CD52     | 1 | 26519313 | 4 | 2.471542 |
| rs17645    | CD52     | 1 | 26519317 | 1 | 3.327119 |
| rs17645    | CD52     | 1 | 26519317 | 4 | 1.97971  |
| rs17645    | CD52     | 1 | 26519317 | 3 | 2.603806 |
| rs17163868 | AIM1L    | 1 | 26520968 | 1 | 4.437014 |
| rs17163868 | AIM1L    | 1 | 26520968 | 4 | 2.022873 |
| rs17163868 | AIM1L    | 1 | 26520968 | 3 | 2.821222 |
| rs10794531 | ZNF683   | 1 | 26566832 | 3 | 1.235921 |
| rs10794531 | ZNF683   | 1 | 26566832 | 1 | 0.94131  |
| rs10794532 | ZNF683   | 1 | 26566847 | 1 | 0.202123 |
| rs10794532 | ZNF683   | 1 | 26566847 | 5 | 0.714026 |
| rs9438623  | LIN28    | 1 | 26628506 | 7 | 4.665754 |
| rs9438623  | LIN28    | 1 | 26628506 | 4 | 3.658919 |
| rs9438623  | LIN28    | 1 | 26628506 | 1 | 5.118013 |
| rs11247957 | LIN28    | 1 | 26628761 | 2 | 0.387646 |
| rs11247957 | LIN28    | 1 | 26628761 | 1 | 0.303578 |
| rs6697410  | LIN28    | 1 | 26628796 | 7 | 0.026151 |
| rs6697410  | LIN28    | 1 | 26628796 | 4 | 0.143009 |
| rs6697410  | LIN28    | 1 | 26628796 | 3 | 0.083288 |
| rs6697410  | LIN28    | 1 | 26628796 | 1 | 2.64068  |

|               |          |   |          |   |          |
|---------------|----------|---|----------|---|----------|
| rs11542704    | SFN      | 1 | 27062911 | 1 | 2.565048 |
| rs3170660     | ATPBD1B  | 1 | 27083308 | 7 | 10.78333 |
| rs3170660     | ATPBD1B  | 1 | 27083308 | 2 | 3.604881 |
| rs3170660     | ATPBD1B  | 1 | 27083308 | 5 | 0.207062 |
| rs3170660     | ATPBD1B  | 1 | 27083308 | 8 | 6.955216 |
| rs7504        | NROB2    | 1 | 27110737 | 7 | 0.508645 |
| rs7504        | NROB2    | 1 | 27110737 | 6 | 1.051098 |
| rs7504        | NROB2    | 1 | 27110737 | 5 | 1.327581 |
| rs11538549    | NUDC     | 1 | 27120870 | 6 | 6.258045 |
| rs11538549    | NUDC     | 1 | 27120870 | 8 | 6.65019  |
| rs7866        | NUDC     | 1 | 27145431 | 5 | 0.027335 |
| rs3010109     | C1orf172 | 1 | 27151140 | 3 | 0.069211 |
| rs3010109     | C1orf172 | 1 | 27151140 | 4 | 7.108195 |
| rs3813795     | SYTL1    | 1 | 27552384 | 4 | 0.376327 |
| rs3813795     | SYTL1    | 1 | 27552384 | 7 | 0.153555 |
| SNP1-27560053 | MAP3K6   | 1 | 27560053 | 7 | 0.150709 |
| SNP1-27560053 | MAP3K6   | 1 | 27560053 | 2 | 0.064834 |
| SNP1-27560053 | MAP3K6   | 1 | 27560053 | 3 | 0.384521 |
| SNP1-27560053 | MAP3K6   | 1 | 27560053 | 6 | 6.607217 |
| SNP1-27560053 | MAP3K6   | 1 | 27560053 | 1 | 0.221775 |
| rs2076457     | AHDC1    | 1 | 27749069 | 7 | 0.090752 |
| rs6564        | C1orf38  | 1 | 28085562 | 7 | 0.45083  |
| rs6565        | C1orf38  | 1 | 28085744 | 7 | 0.320575 |
| rs6565        | C1orf38  | 1 | 28085744 | 5 | 0.350218 |
| rs6565        | C1orf38  | 1 | 28085744 | 1 | 3.463156 |
| rs6565        | C1orf38  | 1 | 28085744 | 6 | 1.634245 |
| rs3813804     | SMPDL3B  | 1 | 28154793 | 1 | 0.666363 |
| rs3813804     | SMPDL3B  | 1 | 28154793 | 5 | 0.885134 |
| rs3813804     | SMPDL3B  | 1 | 28154793 | 2 | 0.089334 |
| rs4654327     | OPRD1    | 1 | 29062725 | 5 | 0.221213 |
| rs2249138     | EPB41    | 1 | 29316310 | 3 | 0.412353 |
| rs9578        | EPB41    | 1 | 29318185 | 5 | 0.546254 |
| rs2452788     | TMEM200B | 1 | 29319398 | 2 | 6.114068 |
| rs2452788     | TMEM200B | 1 | 29319398 | 3 | 0.594348 |
| rs2230677     | SFRS4    | 1 | 29347981 | 3 | 0.096491 |
| rs2640464     | MECR     | 1 | 29392365 | 3 | 0.180493 |
| rs17363069    | MECR     | 1 | 29392611 | 8 | 5.885454 |
| rs17363069    | MECR     | 1 | 29392611 | 4 | 5.050363 |
| rs17363069    | MECR     | 1 | 29392611 | 6 | 6.801532 |
| rs17363069    | MECR     | 1 | 29392611 | 1 | 4.732076 |
| rs1128400     | MECR     | 1 | 29415224 | 3 | 1.031024 |
| rs1746059     | MATN1    | 1 | 30958974 | 2 | 4.755999 |
| rs1746059     | MATN1    | 1 | 30958974 | 5 | 0.190444 |
| rs8048        | LAPTM5   | 1 | 30978383 | 4 | 0.128599 |
| rs8048        | LAPTM5   | 1 | 30978383 | 5 | 0.523479 |
| rs8048        | LAPTM5   | 1 | 30978383 | 3 | 4.520064 |
| rs8048        | LAPTM5   | 1 | 30978383 | 2 | 5.708769 |

|            |         |   |          |   |          |
|------------|---------|---|----------|---|----------|
| rs1050663  | LAPTM5  | 1 | 30987951 | 3 | 1.575455 |
| rs41269523 | SDC3    | 1 | 31122570 | 1 | 6.360687 |
| rs12760571 | PUM1    | 1 | 31177991 | 7 | 5.348262 |
| rs2275741  | PUM1    | 1 | 31199402 | 5 | 0.284124 |
| rs2275741  | PUM1    | 1 | 31199402 | 2 | 1.610871 |
| rs2275741  | PUM1    | 1 | 31199402 | 4 | 0.103091 |
| rs1056526  | HCRTR1  | 1 | 31857491 | 6 | 1.883762 |
| rs2271928  | COL16A1 | 1 | 31900540 | 7 | 0.438326 |
| rs2271928  | COL16A1 | 1 | 31900540 | 3 | 1.142645 |
| rs2271928  | COL16A1 | 1 | 31900540 | 4 | 0.670548 |
| rs10914468 | COL16A1 | 1 | 31936793 | 8 | 5.868111 |
| rs13426    | SPOCD1  | 1 | 32028673 | 7 | 0.348693 |
| rs12117510 | KPNA6   | 1 | 32410006 | 5 | 0.137747 |
| rs704885   | ZBTB8   | 1 | 32839178 | 5 | 3.77706  |
| rs704885   | ZBTB8   | 1 | 32839178 | 1 | 3.665786 |
| rs12567940 | ZBTB8   | 1 | 32840089 | 5 | 0.354631 |
| rs422215   | ZBTB8   | 1 | 32841341 | 1 | 2.857209 |
| rs422215   | ZBTB8   | 1 | 32841341 | 7 | 1.213866 |
| rs422215   | ZBTB8   | 1 | 32841341 | 3 | 1.506286 |
| rs12136921 | ZBTB8   | 1 | 32843365 | 1 | 4.582568 |
| rs3753603  | ZBTB8OS | 1 | 32860024 | 2 | 0.328817 |
| rs3753603  | ZBTB8OS | 1 | 32860024 | 7 | 2.938335 |
| rs3753603  | ZBTB8OS | 1 | 32860024 | 6 | 3.319299 |
| rs3753603  | ZBTB8OS | 1 | 32860024 | 4 | 4.843534 |
| rs3753603  | ZBTB8OS | 1 | 32860024 | 3 | 4.080917 |
| rs3753603  | ZBTB8OS | 1 | 32860024 | 1 | 4.372987 |
| rs699005   | YARS    | 1 | 33018389 | 2 | 0.006748 |
| rs699005   | YARS    | 1 | 33018389 | 1 | 0.143598 |
| rs699005   | YARS    | 1 | 33018389 | 7 | 6.605591 |
| rs1284365  | S100PBP | 1 | 33096675 | 3 | 0.08423  |
| rs1284365  | S100PBP | 1 | 33096675 | 6 | 0.325552 |
| rs1284365  | S100PBP | 1 | 33096675 | 5 | 0.048457 |
| rs3480     | FNDC5   | 1 | 33100752 | 4 | 0.450421 |
| rs3480     | FNDC5   | 1 | 33100752 | 2 | 1.418608 |
| rs3480     | FNDC5   | 1 | 33100752 | 7 | 0.460184 |
| rs3480     | FNDC5   | 1 | 33100752 | 3 | 0.515025 |
| rs3480     | FNDC5   | 1 | 33100752 | 5 | 0.230596 |
| rs622407   | TRIM62  | 1 | 33419537 | 7 | 0.610993 |
| rs11061    | PHC2    | 1 | 33562257 | 6 | 1.499969 |
| rs11554674 | PHC2    | 1 | 33563083 | 6 | 0.406215 |
| rs12026290 | PHC2    | 1 | 33592721 | 6 | 0.536588 |
| rs16835507 | ZSCAN20 | 1 | 33717779 | 6 | 3.027315 |
| rs16835507 | ZSCAN20 | 1 | 33717779 | 1 | 0.359321 |
| rs16835507 | ZSCAN20 | 1 | 33717779 | 4 | 0.734034 |
| rs16835507 | ZSCAN20 | 1 | 33717779 | 2 | 0.633807 |
| rs705207   | C1orf94 | 1 | 34457050 | 2 | 3.161326 |
| rs6698707  | C1orf94 | 1 | 34457164 | 5 | 4.239222 |

|               |          |   |          |   |          |
|---------------|----------|---|----------|---|----------|
| rs6698707     | C1orf94  | 1 | 34457164 | 6 | 2.978502 |
| rs6698707     | C1orf94  | 1 | 34457164 | 3 | 2.755697 |
| rs6698707     | C1orf94  | 1 | 34457164 | 2 | 3.208771 |
| rs6698707     | C1orf94  | 1 | 34457164 | 7 | 2.978529 |
| rs6698707     | C1orf94  | 1 | 34457164 | 4 | 3.462195 |
| rs705193      | GJA4     | 1 | 35033819 | 1 | 2.25993  |
| rs705193      | GJA4     | 1 | 35033819 | 8 | 4.563261 |
| rs705193      | GJA4     | 1 | 35033819 | 2 | 2.724315 |
| rs705193      | GJA4     | 1 | 35033819 | 3 | 0.426331 |
| rs34924462    | ZMYM4    | 1 | 35619619 | 1 | 3.821994 |
| rs3795501     | C1orf216 | 1 | 35953559 | 4 | 0.397859 |
| SNP1-35975172 | CLSPN    | 1 | 35975172 | 6 | 0.008366 |
| SNP1-35975172 | CLSPN    | 1 | 35975172 | 8 | 0.244606 |
| rs399393      | TEKT2    | 1 | 36326260 | 4 | 0.619987 |
| rs399393      | TEKT2    | 1 | 36326260 | 8 | 0.810253 |
| rs399393      | TEKT2    | 1 | 36326260 | 6 | 0.250228 |
| rs1007028     | COL8A2   | 1 | 36334671 | 6 | 0.678885 |
| rs17442970    | C1orf102 | 1 | 36660400 | 2 | 6.116589 |
| rs16822954    | C1orf102 | 1 | 36661592 | 8 | 1.009115 |
| SNP1-36670654 | C1orf102 | 1 | 36670654 | 4 | 0.234606 |
| SNP1-36670654 | C1orf102 | 1 | 36670654 | 3 | 6.565741 |
| SNP1-36670654 | C1orf102 | 1 | 36670654 | 5 | 0.432014 |
| rs3917981     | CSF3R    | 1 | 36709646 | 3 | 0.168745 |
| rs3917981     | CSF3R    | 1 | 36709646 | 6 | 0.573685 |
| rs6691840     | GRIK3    | 1 | 37098064 | 4 | 0.297382 |
| rs6691840     | GRIK3    | 1 | 37098064 | 3 | 0.464187 |
| rs2273013     | SNIP1    | 1 | 37792334 | 3 | 0.067275 |
| rs2273013     | SNIP1    | 1 | 37792334 | 6 | 0.31634  |
| rs3856137     | DNALI1   | 1 | 37804559 | 1 | 5.528386 |
| rs4652964     | RSPO1    | 1 | 37850887 | 8 | 0.080415 |
| rs4652964     | RSPO1    | 1 | 37850887 | 4 | 0.539918 |
| rs4652964     | RSPO1    | 1 | 37850887 | 7 | 1.589048 |
| SNP1-37852104 | RSPO1    | 1 | 37852104 | 1 | 0.542566 |
| rs6670599     | EPHA10   | 1 | 37958310 | 7 | 1.042987 |
| rs12726343    | EPHA10   | 1 | 37958793 | 3 | 0.612586 |
| rs12726343    | EPHA10   | 1 | 37958793 | 7 | 0.718388 |
| rs12405650    | EPHA10   | 1 | 37961327 | 7 | 2.01059  |
| rs12405650    | EPHA10   | 1 | 37961327 | 3 | 2.368261 |
| rs17464871    | EPHA10   | 1 | 37961355 | 7 | 1.34097  |
| rs17464871    | EPHA10   | 1 | 37961355 | 3 | 0.520647 |
| rs17511304    | EPHA10   | 1 | 37961374 | 7 | 0.416695 |
| rs17511304    | EPHA10   | 1 | 37961374 | 3 | 1.375278 |
| rs12751325    | MTF1     | 1 | 38061970 | 7 | 3.780297 |
| rs12751325    | MTF1     | 1 | 38061970 | 3 | 0.39863  |
| rs11210870    | SF3A3    | 1 | 38222497 | 3 | 0.608744 |
| rs11210870    | SF3A3    | 1 | 38222497 | 6 | 1.825232 |
| rs783824      | KIAA0754 | 1 | 39653352 | 3 | 4.208066 |



|               |           |   |          |   |          |
|---------------|-----------|---|----------|---|----------|
| rs653064      | KIAA0754  | 1 | 39654588 | 2 | 4.975283 |
| rs668556      | MACF1     | 1 | 39686950 | 8 | 7.459939 |
| rs668556      | MACF1     | 1 | 39686950 | 2 | 9.40465  |
| rs668556      | MACF1     | 1 | 39686950 | 5 | 0.366718 |
| rs668556      | MACF1     | 1 | 39686950 | 4 | 0.529247 |
| rs668556      | MACF1     | 1 | 39686950 | 1 | 0.004274 |
| rs668556      | MACF1     | 1 | 39686950 | 3 | 0.257948 |
| rs1746838     | MACF1     | 1 | 39690475 | 3 | 0.545539 |
| rs3738676     | BMP8A     | 1 | 39764175 | 1 | 4.533489 |
| rs1180341     | BMP8A     | 1 | 39765395 | 3 | 0.412638 |
| rs1180341     | BMP8A     | 1 | 39765395 | 7 | 1.616338 |
| rs1180341     | BMP8A     | 1 | 39765395 | 4 | 2.133974 |
| rs1180341     | BMP8A     | 1 | 39765395 | 1 | 1.738612 |
| rs1180343     | LOC728448 | 1 | 39766019 | 7 | 0.453408 |
| rs1180343     | LOC728448 | 1 | 39766019 | 3 | 0.342377 |
| rs1180343     | LOC728448 | 1 | 39766019 | 1 | 2.241439 |
| rs1180343     | LOC728448 | 1 | 39766019 | 5 | 1.350587 |
| rs1180343     | LOC728448 | 1 | 39766019 | 2 | 1.341449 |
| rs1180343     | LOC728448 | 1 | 39766019 | 4 | 2.563976 |
| rs10839       | HPCAL4    | 1 | 39917405 | 1 | 0.71521  |
| rs562056      | BMP8B     | 1 | 39998208 | 7 | 0.648703 |
| rs562056      | BMP8B     | 1 | 39998208 | 5 | 4.851479 |
| rs3845570     | TRIT1     | 1 | 40121718 | 7 | 2.147236 |
| rs3845570     | TRIT1     | 1 | 40121718 | 3 | 1.657634 |
| rs3845570     | TRIT1     | 1 | 40121718 | 1 | 0.309977 |
| rs3845570     | TRIT1     | 1 | 40121718 | 2 | 2.371736 |
| rs41312030    | SMAP2     | 1 | 40655334 | 8 | 0.229725 |
| SNP1-40753413 | C1orf176  | 1 | 40753413 | 6 | 0.012189 |
| rs17412556    | RIMS3     | 1 | 40861164 | 7 | 0.382388 |
| rs17412556    | RIMS3     | 1 | 40861164 | 4 | 0.28942  |
| rs7520333     | RIMS3     | 1 | 40862837 | 6 | 2.111953 |
| rs570671      | RIMS3     | 1 | 40863714 | 1 | 5.291016 |
| rs570671      | RIMS3     | 1 | 40863714 | 7 | 1.118049 |
| rs570671      | RIMS3     | 1 | 40863714 | 6 | 5.894268 |
| rs679663      | RIMS3     | 1 | 40864605 | 4 | 5.642114 |
| rs679663      | RIMS3     | 1 | 40864605 | 7 | 5.138616 |
| rs4660468     | KCNQ4     | 1 | 41057674 | 8 | 0.527311 |
| rs4660468     | KCNQ4     | 1 | 41057674 | 7 | 0.154298 |
| rs4660468     | KCNQ4     | 1 | 41057674 | 3 | 0.708032 |
| rs11577910    | CTPS      | 1 | 41250031 | 8 | 4.110719 |
| rs12121539    | SLFN1     | 1 | 41253874 | 8 | 0.890155 |
| rs1138293     | SLFN1     | 1 | 41258832 | 5 | 0.704674 |
| rs3738369     | SLFN1     | 1 | 41258995 | 3 | 1.3709   |
| rs3738369     | SLFN1     | 1 | 41258995 | 5 | 1.115001 |
| rs17357954    | SLFN1     | 1 | 41259924 | 4 | 0.493273 |
| rs17357954    | SLFN1     | 1 | 41259924 | 5 | 2.355496 |
| rs17357954    | SLFN1     | 1 | 41259924 | 8 | 2.006853 |

|            |             |   |          |   |          |
|------------|-------------|---|----------|---|----------|
| rs17357954 | SLFNL1      | 1 | 41259924 | 2 | 1.949932 |
| rs17357954 | SLFNL1      | 1 | 41259924 | 7 | 1.556447 |
| rs17357954 | SLFNL1      | 1 | 41259924 | 6 | 1.320273 |
| rs11809423 | HIVEP3      | 1 | 41749116 | 5 | 0.173472 |
| rs17363472 | HIVEP3      | 1 | 41819795 | 5 | 0.03257  |
| rs12049046 | RP4-692D3.1 | 1 | 42815290 | 4 | 0.448284 |
| rs12049046 | RP4-692D3.1 | 1 | 42815290 | 5 | 0.431186 |
| rs12037518 | RP4-692D3.1 | 1 | 42819644 | 4 | 0.615913 |
| rs12037518 | RP4-692D3.1 | 1 | 42819644 | 5 | 0.410665 |
| rs12036818 | RP4-692D3.1 | 1 | 42880775 | 4 | 1.123324 |
| rs7556478  | PPIH        | 1 | 42904240 | 4 | 0.484474 |
| rs912075   | CLDN19      | 1 | 42973113 | 7 | 1.09677  |
| rs912075   | CLDN19      | 1 | 42973113 | 5 | 2.221485 |
| rs12124733 | ERMAP       | 1 | 43068705 | 4 | 11.53704 |
| rs12124733 | ERMAP       | 1 | 43068705 | 5 | 5.706233 |
| rs33950227 | ERMAP       | 1 | 43068760 | 4 | 3.972189 |
| rs33950227 | ERMAP       | 1 | 43068760 | 7 | 0.702188 |
| rs33950227 | ERMAP       | 1 | 43068760 | 3 | 0.831731 |
| rs33950227 | ERMAP       | 1 | 43068760 | 2 | 4.623078 |
| rs33953680 | ERMAP       | 1 | 43068782 | 2 | 1.383597 |
| rs33953680 | ERMAP       | 1 | 43068782 | 1 | 0.802484 |
| rs33953680 | ERMAP       | 1 | 43068782 | 3 | 0.346535 |
| rs33953680 | ERMAP       | 1 | 43068782 | 7 | 1.072848 |
| rs33953680 | ERMAP       | 1 | 43068782 | 4 | 0.554475 |
| rs12406279 | ERMAP       | 1 | 43083226 | 7 | 0.366278 |
| rs12406279 | ERMAP       | 1 | 43083226 | 3 | 4.239523 |
| rs4658     | SLC2A1      | 1 | 43164837 | 2 | 0.956421 |
| rs12074551 | hCG_23177   | 1 | 43391183 | 4 | 1.905677 |
| rs12074551 | hCG_23177   | 1 | 43391183 | 1 | 3.824121 |
| rs7163     | EBNA1BP2    | 1 | 43405123 | 1 | 2.923609 |
| rs7163     | EBNA1BP2    | 1 | 43405123 | 4 | 9.724656 |
| rs1049276  | EBNA1BP2    | 1 | 43409071 | 1 | 4.467573 |
| rs1049276  | EBNA1BP2    | 1 | 43409071 | 4 | 0.013284 |
| rs1782386  | WDR65       | 1 | 43410997 | 1 | 3.751784 |
| rs1782386  | WDR65       | 1 | 43410997 | 4 | 0.466329 |
| rs663824   | WDR65       | 1 | 43422095 | 2 | 1.045367 |
| rs663824   | WDR65       | 1 | 43422095 | 1 | 0.198403 |
| rs663824   | WDR65       | 1 | 43422095 | 4 | 0.698072 |
| rs603123   | WDR65       | 1 | 43436805 | 2 | 1.004712 |
| rs603123   | WDR65       | 1 | 43436805 | 1 | 1.412263 |
| rs603123   | WDR65       | 1 | 43436805 | 4 | 0.724606 |
| rs3120276  | TIE1        | 1 | 43552151 | 6 | 1.819485 |
| rs839753   | C1orf84     | 1 | 43628165 | 5 | 0.028848 |
| rs839753   | C1orf84     | 1 | 43628165 | 1 | 0.08751  |
| rs839753   | C1orf84     | 1 | 43628165 | 3 | 0.842892 |
| rs839753   | C1orf84     | 1 | 43628165 | 2 | 0.826624 |
| rs839769   | C1orf84     | 1 | 43644654 | 3 | 1.149827 |

|            |           |   |          |   |          |
|------------|-----------|---|----------|---|----------|
| rs839769   | C1orf84   | 1 | 43644654 | 5 | 1.007536 |
| rs839769   | C1orf84   | 1 | 43644654 | 4 | 0.655269 |
| rs839769   | C1orf84   | 1 | 43644654 | 8 | 3.195248 |
| rs2027130  | KIAA0467  | 1 | 43679483 | 6 | 2.567478 |
| rs2027130  | KIAA0467  | 1 | 43679483 | 3 | 2.127124 |
| rs2027130  | KIAA0467  | 1 | 43679483 | 8 | 2.289183 |
| rs2027130  | KIAA0467  | 1 | 43679483 | 4 | 1.861208 |
| rs2027130  | KIAA0467  | 1 | 43679483 | 2 | 3.940434 |
| rs2027130  | KIAA0467  | 1 | 43679483 | 5 | 3.509795 |
| rs2251804  | KIAA0467  | 1 | 43689996 | 4 | 1.69544  |
| rs2251804  | KIAA0467  | 1 | 43689996 | 5 | 0.770705 |
| rs2251804  | KIAA0467  | 1 | 43689996 | 8 | 0.319269 |
| rs2251804  | KIAA0467  | 1 | 43689996 | 6 | 4.550918 |
| rs2251804  | KIAA0467  | 1 | 43689996 | 3 | 1.145759 |
| rs3828151  | PTPRF     | 1 | 43830852 | 5 | 0.054348 |
| rs3828151  | PTPRF     | 1 | 43830852 | 3 | 0.444299 |
| rs3828151  | PTPRF     | 1 | 43830852 | 1 | 4.818313 |
| rs631248   | PTPRF     | 1 | 43843808 | 8 | 0.375683 |
| rs631248   | PTPRF     | 1 | 43843808 | 7 | 0.615764 |
| rs641365   | PTPRF     | 1 | 43856094 | 1 | 5.127435 |
| rs641365   | PTPRF     | 1 | 43856094 | 7 | 7.400176 |
| rs6801     | ST3GAL3   | 1 | 44169233 | 7 | 0.060703 |
| rs6801     | ST3GAL3   | 1 | 44169233 | 1 | 7.072994 |
| rs6801     | ST3GAL3   | 1 | 44169233 | 5 | 0.048369 |
| rs6801     | ST3GAL3   | 1 | 44169233 | 4 | 0.508904 |
| rs2242637  | ARTN      | 1 | 44173971 | 1 | 4.294118 |
| rs2242637  | ARTN      | 1 | 44173971 | 4 | 0.511481 |
| rs17402858 | IPO13     | 1 | 44195209 | 5 | 5.546314 |
| rs17402858 | IPO13     | 1 | 44195209 | 1 | 5.716583 |
| rs2286241  | ATP6V0B   | 1 | 44213356 | 3 | 0.547416 |
| rs2248253  | SLC6A9    | 1 | 44235757 | 1 | 2.486041 |
| rs2248829  | SLC6A9    | 1 | 44240822 | 1 | 4.438311 |
| rs2485652  | KLF17     | 1 | 44367997 | 2 | 0.891492 |
| rs2485652  | KLF17     | 1 | 44367997 | 5 | 0.529936 |
| rs2485652  | KLF17     | 1 | 44367997 | 1 | 0.427298 |
| rs3795713  | KIF2C     | 1 | 44991482 | 6 | 0.731542 |
| rs11584031 | LOC149478 | 1 | 45052303 | 4 | 0.016998 |
| rs11573587 | PTCH2     | 1 | 45065905 | 3 | 1.505182 |
| rs7525308  | PTCH2     | 1 | 45066105 | 4 | 0.31315  |
| rs7525308  | PTCH2     | 1 | 45066105 | 2 | 0.804839 |
| rs11556200 | EIF2B3    | 1 | 45216625 | 6 | 0.150347 |
| rs489676   | EIF2B3    | 1 | 45224814 | 4 | 0.838254 |
| rs489676   | EIF2B3    | 1 | 45224814 | 2 | 3.945566 |
| rs8681     | HECTD3    | 1 | 45241193 | 2 | 3.891304 |
| rs41312020 | HECTD3    | 1 | 45242173 | 6 | 4.541919 |
| rs7551698  | ZSWIM5    | 1 | 45277307 | 2 | 4.165871 |
| rs7551698  | ZSWIM5    | 1 | 45277307 | 6 | 0.154354 |

|            |           |   |          |   |          |
|------------|-----------|---|----------|---|----------|
| rs3893383  | TESK2     | 1 | 45583510 | 4 | 6.555062 |
| rs6429567  | TESK2     | 1 | 45729287 | 2 | 1.620362 |
| rs3790583  | TESK2     | 1 | 45729415 | 7 | 0.182204 |
| rs11580609 | MMACHC    | 1 | 45748443 | 2 | 2.964621 |
| rs11580609 | MMACHC    | 1 | 45748443 | 4 | 0.147815 |
| rs11580609 | MMACHC    | 1 | 45748443 | 6 | 4.35671  |
| rs7903     | MMACHC    | 1 | 45749059 | 6 | 0.254693 |
| rs7903     | MMACHC    | 1 | 45749059 | 7 | 0.098625 |
| rs2230658  | NASP      | 1 | 45851441 | 7 | 0.177164 |
| rs2230658  | NASP      | 1 | 45851441 | 4 | 0.621533 |
| rs2275085  | CCDC17    | 1 | 45858439 | 4 | 5.511727 |
| rs3014246  | CCDC17    | 1 | 45858664 | 2 | 5.412353 |
| rs3014246  | CCDC17    | 1 | 45858664 | 4 | 0.311896 |
| rs3014242  | CCDC17    | 1 | 45860164 | 7 | 0.42419  |
| rs3014242  | CCDC17    | 1 | 45860164 | 4 | 0.707455 |
| rs3811436  | GPBP1L1   | 1 | 45898467 | 7 | 0.805986 |
| rs3811436  | GPBP1L1   | 1 | 45898467 | 4 | 0.532318 |
| rs10749856 | IPP       | 1 | 45937433 | 2 | 2.135365 |
| rs10749856 | IPP       | 1 | 45937433 | 7 | 1.252677 |
| rs10749856 | IPP       | 1 | 45937433 | 4 | 1.276873 |
| rs1707336  | MAST2     | 1 | 46266047 | 4 | 5.485677 |
| rs1707336  | MAST2     | 1 | 46266047 | 1 | 0.435266 |
| rs1707336  | MAST2     | 1 | 46266047 | 2 | 2.331646 |
| rs1707337  | PIK3R3    | 1 | 46281356 | 7 | 0.613587 |
| rs1707337  | PIK3R3    | 1 | 46281356 | 2 | 3.697848 |
| rs1707337  | PIK3R3    | 1 | 46281356 | 4 | 2.76008  |
| rs1707303  | PIK3R3    | 1 | 46370860 | 7 | 0.514932 |
| rs1707303  | PIK3R3    | 1 | 46370860 | 4 | 0.488974 |
| rs41292543 | UQCRH     | 1 | 46547370 | 4 | 4.994781 |
| rs41292543 | UQCRH     | 1 | 46547370 | 6 | 6.046794 |
| rs17361749 | NSUN4     | 1 | 46579067 | 2 | 2.510209 |
| rs17361749 | NSUN4     | 1 | 46579067 | 7 | 2.085443 |
| rs17361749 | NSUN4     | 1 | 46579067 | 3 | 2.941777 |
| rs17361749 | NSUN4     | 1 | 46579067 | 1 | 2.233062 |
| rs17361749 | NSUN4     | 1 | 46579067 | 5 | 2.398992 |
| rs324420   | FAAH      | 1 | 46643348 | 5 | 0.128476 |
| rs547581   | LOC729041 | 1 | 46683479 | 1 | 0.24933  |
| rs547581   | LOC729041 | 1 | 46683479 | 8 | 1.176955 |
| rs547581   | LOC729041 | 1 | 46683479 | 7 | 4.592309 |
| rs547581   | LOC729041 | 1 | 46683479 | 6 | 0.373328 |
| rs1258036  | KNCN      | 1 | 46784274 | 3 | 0.821995 |
| rs1258036  | KNCN      | 1 | 46784274 | 5 | 0.812487 |
| rs885127   | KNCN      | 1 | 46784731 | 1 | 5.707445 |
| rs10890404 | KNCN      | 1 | 46785767 | 2 | 4.066649 |
| rs10890404 | KNCN      | 1 | 46785767 | 1 | 1.06761  |
| rs10890404 | KNCN      | 1 | 46785767 | 3 | 1.508557 |
| rs8602     | MKNK1     | 1 | 46796118 | 8 | 6.602133 |

|               |           |   |          |   |          |
|---------------|-----------|---|----------|---|----------|
| rs8602        | MKNK1     | 1 | 46796118 | 2 | 7.002494 |
| rs6671527     | MOBKL2C   | 1 | 46853266 | 4 | 1.02318  |
| rs6671527     | MOBKL2C   | 1 | 46853266 | 3 | 0.934012 |
| rs6671527     | MOBKL2C   | 1 | 46853266 | 5 | 0.590914 |
| rs6671527     | MOBKL2C   | 1 | 46853266 | 1 | 2.772972 |
| SNP1-46853328 | MOBKL2C   | 1 | 46853328 | 2 | 3.86408  |
| SNP1-46853328 | MOBKL2C   | 1 | 46853328 | 8 | 0.888454 |
| rs4646487     | CYP4B1    | 1 | 47051762 | 3 | 0.4979   |
| rs2297810     | CYP4B1    | 1 | 47053446 | 6 | 5.708931 |
| rs4646491     | CYP4B1    | 1 | 47053471 | 6 | 2.937243 |
| rs2056900     | CYP4A22   | 1 | 47380372 | 5 | 0.93603  |
| rs2056900     | CYP4A22   | 1 | 47380372 | 3 | 0.931759 |
| rs2056900     | CYP4A22   | 1 | 47380372 | 4 | 0.173117 |
| rs10789501    | CYP4A22   | 1 | 47382076 | 4 | 1.380006 |
| rs10789501    | CYP4A22   | 1 | 47382076 | 2 | 1.628647 |
| rs10789501    | CYP4A22   | 1 | 47382076 | 5 | 0.478102 |
| rs10789501    | CYP4A22   | 1 | 47382076 | 3 | 1.07034  |
| rs2070929     | TAL1      | 1 | 47456194 | 1 | 0.478388 |
| rs977747      | TAL1      | 1 | 47457264 | 3 | 0.278439 |
| rs3125630     | STIL      | 1 | 47540501 | 5 | 0.079899 |
| rs3125630     | STIL      | 1 | 47540501 | 3 | 0.370721 |
| rs3814006     | LOC388630 | 1 | 48232494 | 4 | 0.86555  |
| rs3814006     | LOC388630 | 1 | 48232494 | 6 | 4.800604 |
| rs3814006     | LOC388630 | 1 | 48232494 | 8 | 4.514445 |
| rs6679038     | LOC388630 | 1 | 48236131 | 1 | 1.51198  |
| rs6679038     | LOC388630 | 1 | 48236131 | 4 | 1.462962 |
| rs10788882    | LOC391037 | 1 | 48403025 | 3 | 0.705516 |
| rs10788882    | LOC391037 | 1 | 48403025 | 4 | 0.056429 |
| rs10788882    | LOC391037 | 1 | 48403025 | 6 | 0.490942 |
| rs7539694     | AGBL4     | 1 | 48822262 | 7 | 0.754958 |
| rs2480683     | ELAVL4    | 1 | 50433998 | 4 | 1.737044 |
| rs3176451     | CDKN2C    | 1 | 51207191 | 1 | 0.222488 |
| rs7512076     | TXNDC12   | 1 | 52258692 | 3 | 0.930017 |
| rs2809918     | KTI12     | 1 | 52270700 | 1 | 4.975935 |
| SNP1-52476079 | ZFYVE9    | 1 | 52476079 | 3 | 0.290807 |
| rs17364363    | CC2D1B    | 1 | 52589547 | 3 | 1.321762 |
| rs11555349    | CC2D1B    | 1 | 52600972 | 3 | 0.477621 |
| rs3087471     | ORC1L     | 1 | 52611210 | 8 | 2.04576  |
| rs17107416    | ZYG11B    | 1 | 53061872 | 5 | 0.261431 |
| rs480299      | ZYG11A    | 1 | 53092862 | 5 | 0.44385  |
| rs480299      | ZYG11A    | 1 | 53092862 | 1 | 0.880719 |
| rs480299      | ZYG11A    | 1 | 53092862 | 8 | 0.12343  |
| rs480299      | ZYG11A    | 1 | 53092862 | 3 | 0.985799 |
| rs7552139     | ECHDC2    | 1 | 53159967 | 2 | 2.087802 |
| rs7552139     | ECHDC2    | 1 | 53159967 | 3 | 0.268661 |
| rs7552139     | ECHDC2    | 1 | 53159967 | 7 | 0.291603 |
| rs7552139     | ECHDC2    | 1 | 53159967 | 6 | 0.536966 |

|               |           |   |          |   |          |
|---------------|-----------|---|----------|---|----------|
| rs7552139     | ECHDC2    | 1 | 53159967 | 4 | 4.086984 |
| rs7552139     | ECHDC2    | 1 | 53159967 | 8 | 5.348169 |
| rs11581638    | SCP2      | 1 | 53232278 | 6 | 2.873616 |
| rs10493171    | LOC653511 | 1 | 53233852 | 6 | 0.690531 |
| rs1288386     | PODN      | 1 | 53308066 | 2 | 0.742841 |
| rs1288389     | PODN      | 1 | 53317185 | 1 | 0.866377 |
| rs1288389     | PODN      | 1 | 53317185 | 5 | 2.020881 |
| rs2282340     | PODN      | 1 | 53323653 | 5 | 0.498085 |
| rs1288399     | SLC1A7    | 1 | 53326073 | 1 | 0.717274 |
| rs1288401     | SLC1A7    | 1 | 53326342 | 1 | 0.836261 |
| rs2297660     | LRP8      | 1 | 53504903 | 1 | 0.781618 |
| rs2297660     | LRP8      | 1 | 53504903 | 2 | 1.267026 |
| rs2297660     | LRP8      | 1 | 53504903 | 8 | 0.016781 |
| rs2297660     | LRP8      | 1 | 53504903 | 4 | 1.005305 |
| rs2297660     | LRP8      | 1 | 53504903 | 6 | 1.915528 |
| rs2297660     | LRP8      | 1 | 53504903 | 3 | 0.97644  |
| rs3820198     | LRP8      | 1 | 53565239 | 5 | 2.631756 |
| rs3820198     | LRP8      | 1 | 53565239 | 8 | 0.770476 |
| rs3820198     | LRP8      | 1 | 53565239 | 4 | 1.231192 |
| rs3820198     | LRP8      | 1 | 53565239 | 7 | 3.707539 |
| SNP1-53566099 | LRP8      | 1 | 53566099 | 4 | 0.463256 |
| SNP1-53566099 | LRP8      | 1 | 53566099 | 7 | 0.208743 |
| SNP1-53566099 | LRP8      | 1 | 53566099 | 6 | 0.074806 |
| SNP1-53566099 | LRP8      | 1 | 53566099 | 5 | 1.064668 |
| rs2296759     | GLIS1     | 1 | 53744720 | 5 | 1.186244 |
| rs3817871     | YIPF1     | 1 | 54127523 | 1 | 2.977159 |
| rs11206244    | DIO1      | 1 | 54148289 | 2 | 1.672791 |
| rs11206244    | DIO1      | 1 | 54148289 | 1 | 1.151791 |
| rs11206244    | DIO1      | 1 | 54148289 | 7 | 1.016289 |
| rs11206244    | DIO1      | 1 | 54148289 | 5 | 0.325403 |
| rs11206244    | DIO1      | 1 | 54148289 | 3 | 0.320513 |
| rs12096978    | CDCP2     | 1 | 54391694 | 3 | 0.184201 |
| rs7519887     | CDCP2     | 1 | 54391992 | 1 | 1.356248 |
| rs13571       | MRPL37    | 1 | 54454508 | 6 | 6.119067 |
| rs13571       | MRPL37    | 1 | 54454508 | 3 | 0.064824 |
| rs1617287     | ACOT11    | 1 | 54847428 | 4 | 0.686686 |
| rs1617287     | ACOT11    | 1 | 54847428 | 2 | 5.022225 |
| SNP1-54891732 | C1orf175  | 1 | 54891732 | 1 | 0.621315 |
| SNP1-54891732 | C1orf175  | 1 | 54891732 | 3 | 1.346553 |
| rs1655519     | C1orf175  | 1 | 54892103 | 7 | 0.600922 |
| rs1655519     | C1orf175  | 1 | 54892103 | 1 | 5.017135 |
| rs1655519     | C1orf175  | 1 | 54892103 | 5 | 0.163153 |
| rs1655519     | C1orf175  | 1 | 54892103 | 6 | 4.291472 |
| rs1655519     | C1orf175  | 1 | 54892103 | 3 | 0.306555 |
| rs17399810    | C1orf175  | 1 | 54892122 | 2 | 5.587837 |
| rs17399810    | C1orf175  | 1 | 54892122 | 6 | 3.523927 |
| rs17399810    | C1orf175  | 1 | 54892122 | 5 | 0.366933 |

|            |          |   |          |   |          |
|------------|----------|---|----------|---|----------|
| rs17399810 | C1orf175 | 1 | 54892122 | 7 | 0.834711 |
| rs480963   | C1orf175 | 1 | 54909117 | 3 | 0.087775 |
| rs480963   | C1orf175 | 1 | 54909117 | 1 | 3.216012 |
| rs480963   | C1orf175 | 1 | 54909117 | 5 | 0.390437 |
| rs480963   | C1orf175 | 1 | 54909117 | 7 | 3.922298 |
| rs570218   | C1orf175 | 1 | 54912329 | 7 | 0.137964 |
| rs1065173  | C1orf175 | 1 | 54939430 | 4 | 1.13863  |
| rs1065173  | C1orf175 | 1 | 54939430 | 7 | 0.924702 |
| rs646356   | C1orf175 | 1 | 54940361 | 1 | 2.888674 |
| rs1147990  | TTC4     | 1 | 54954888 | 2 | 6.528225 |
| rs1147990  | TTC4     | 1 | 54954888 | 5 | 4.9053   |
| rs13046    | TTC4     | 1 | 54980342 | 5 | 0.154388 |
| rs13046    | TTC4     | 1 | 54980342 | 2 | 5.22548  |
| rs11577368 | PARS2    | 1 | 54997339 | 7 | 0.025988 |
| rs11577368 | PARS2    | 1 | 54997339 | 2 | 3.571238 |
| rs2286202  | TTC22    | 1 | 55023272 | 5 | 1.309479 |
| rs2286202  | TTC22    | 1 | 55023272 | 4 | 1.202642 |
| rs2286202  | TTC22    | 1 | 55023272 | 8 | 3.082915 |
| rs1147984  | TTC22    | 1 | 55039433 | 6 | 0.143174 |
| rs1147984  | TTC22    | 1 | 55039433 | 1 | 2.296671 |
| rs1147984  | TTC22    | 1 | 55039433 | 8 | 2.24596  |
| rs1147984  | TTC22    | 1 | 55039433 | 4 | 0.108963 |
| rs757581   | C1orf177 | 1 | 55044362 | 1 | 0.755316 |
| rs9782980  | C1orf177 | 1 | 55046168 | 8 | 2.77663  |
| rs9782980  | C1orf177 | 1 | 55046168 | 1 | 4.19961  |
| rs9782980  | C1orf177 | 1 | 55046168 | 6 | 0.874268 |
| rs9782980  | C1orf177 | 1 | 55046168 | 4 | 1.500581 |
| rs17111100 | C1orf177 | 1 | 55080281 | 7 | 0.345868 |
| rs17111100 | C1orf177 | 1 | 55080281 | 8 | 0.71639  |
| rs6682884  | BSND     | 1 | 55246913 | 3 | 1.442941 |
| rs6682884  | BSND     | 1 | 55246913 | 7 | 0.544314 |
| rs11583680 | PCSK9    | 1 | 55278256 | 3 | 0.635224 |
| rs11583680 | PCSK9    | 1 | 55278256 | 1 | 2.088745 |
| rs540796   | PCSK9    | 1 | 55296785 | 4 | 0.976235 |
| rs540796   | PCSK9    | 1 | 55296785 | 5 | 0.604964 |
| rs540796   | PCSK9    | 1 | 55296785 | 3 | 1.733644 |
| rs540796   | PCSK9    | 1 | 55296785 | 7 | 1.462534 |
| rs562556   | PCSK9    | 1 | 55296825 | 7 | 0.978715 |
| rs562556   | PCSK9    | 1 | 55296825 | 5 | 0.213787 |
| rs562556   | PCSK9    | 1 | 55296825 | 3 | 1.227362 |
| rs562556   | PCSK9    | 1 | 55296825 | 4 | 0.263422 |
| rs13312    | USP24    | 1 | 55305330 | 3 | 0.392315 |
| rs13312    | USP24    | 1 | 55305330 | 7 | 7.928065 |
| rs13312    | USP24    | 1 | 55305330 | 4 | 0.284103 |
| rs1165222  | USP24    | 1 | 55410663 | 3 | 0.935321 |
| rs1165222  | USP24    | 1 | 55410663 | 5 | 6.313278 |
| rs1165222  | USP24    | 1 | 55410663 | 4 | 0.020219 |

|            |           |   |          |   |          |
|------------|-----------|---|----------|---|----------|
| rs1165222  | USP24     | 1 | 55410663 | 7 | 0.880847 |
| rs17131774 | LOC729423 | 1 | 58286678 | 1 | 1.639902 |
| rs1109896  | OMA1      | 1 | 58784992 | 5 | 1.030438 |
| rs1109896  | OMA1      | 1 | 58784992 | 6 | 0.474408 |
| rs1109895  | OMA1      | 1 | 58785019 | 5 | 0.601158 |
| rs17118103 | MYSM1     | 1 | 58920706 | 1 | 0.183872 |
| rs2280274  | CYP2J2    | 1 | 60131665 | 2 | 4.945823 |
| rs11572191 | CYP2J2    | 1 | 60164859 | 3 | 0.176539 |
| rs626251   | C1orf87   | 1 | 60239402 | 6 | 2.897085 |
| rs12737449 | C1orf87   | 1 | 60278371 | 5 | 0.291962 |
| rs12737449 | C1orf87   | 1 | 60278371 | 3 | 0.456324 |
| rs12737449 | C1orf87   | 1 | 60278371 | 6 | 1.381042 |
| rs12737449 | C1orf87   | 1 | 60278371 | 4 | 0.6872   |
| rs10493277 | C1orf87   | 1 | 60279332 | 3 | 0.050364 |
| rs2498982  | INADL     | 1 | 62289271 | 1 | 0.166372 |
| rs2498982  | INADL     | 1 | 62289271 | 8 | 7.69647  |
| rs2498982  | INADL     | 1 | 62289271 | 6 | 0.084378 |
| rs2498982  | INADL     | 1 | 62289271 | 5 | 10.83455 |
| rs2457829  | L1TD1     | 1 | 62445134 | 2 | 2.695712 |
| rs7542665  | L1TD1     | 1 | 62445625 | 3 | 1.422716 |
| rs7533274  | L1TD1     | 1 | 62445813 | 3 | 0.570031 |
| rs7533274  | L1TD1     | 1 | 62445813 | 4 | 0.047772 |
| rs4625314  | L1TD1     | 1 | 62448207 | 1 | 4.743898 |
| rs4625314  | L1TD1     | 1 | 62448207 | 4 | 1.256432 |
| rs4625314  | L1TD1     | 1 | 62448207 | 7 | 1.165154 |
| rs4625314  | L1TD1     | 1 | 62448207 | 8 | 1.98342  |
| rs4625314  | L1TD1     | 1 | 62448207 | 6 | 1.619852 |
| rs4625314  | L1TD1     | 1 | 62448207 | 3 | 1.407467 |
| rs11207933 | L1TD1     | 1 | 62448679 | 7 | 0.163019 |
| rs11207933 | L1TD1     | 1 | 62448679 | 5 | 2.337091 |
| rs1056517  | L1TD1     | 1 | 62449636 | 7 | 0.33029  |
| rs1056517  | L1TD1     | 1 | 62449636 | 3 | 0.405096 |
| rs1056517  | L1TD1     | 1 | 62449636 | 1 | 4.291662 |
| rs1056517  | L1TD1     | 1 | 62449636 | 4 | 0.909844 |
| rs1056517  | L1TD1     | 1 | 62449636 | 8 | 0.610211 |
| rs17123220 | ANKRD38   | 1 | 62476274 | 1 | 5.886107 |
| rs2941679  | ANKRD38   | 1 | 62485812 | 5 | 0.703788 |
| rs2666472  | ANKRD38   | 1 | 62501372 | 3 | 0.154686 |
| rs2666472  | ANKRD38   | 1 | 62501372 | 5 | 1.087766 |
| rs2666472  | ANKRD38   | 1 | 62501372 | 7 | 0.267532 |
| rs2666472  | ANKRD38   | 1 | 62501372 | 4 | 0.841652 |
| rs2260581  | ANKRD38   | 1 | 62501449 | 3 | 0.872445 |
| rs2260581  | ANKRD38   | 1 | 62501449 | 5 | 0.050461 |
| rs2260581  | ANKRD38   | 1 | 62501449 | 6 | 1.763027 |
| rs2260581  | ANKRD38   | 1 | 62501449 | 4 | 2.455048 |
| rs2262110  | ANKRD38   | 1 | 62501506 | 4 | 2.91631  |
| rs2262110  | ANKRD38   | 1 | 62501506 | 6 | 1.360416 |



|               |           |   |          |   |          |
|---------------|-----------|---|----------|---|----------|
| rs2262110     | ANKRD38   | 1 | 62501506 | 5 | 0.78095  |
| rs2262110     | ANKRD38   | 1 | 62501506 | 7 | 0.559788 |
| rs2262110     | ANKRD38   | 1 | 62501506 | 3 | 0.733875 |
| rs12127930    | ANKRD38   | 1 | 62512653 | 7 | 2.347789 |
| rs2666507     | ANKRD38   | 1 | 62513037 | 5 | 0.845015 |
| rs2666507     | ANKRD38   | 1 | 62513037 | 7 | 0.504326 |
| rs11208084    | LOC199897 | 1 | 63239010 | 6 | 2.599176 |
| rs11208084    | LOC199897 | 1 | 63239010 | 8 | 1.89183  |
| rs2273367     | EFCAB7    | 1 | 63793684 | 3 | 0.239585 |
| rs3828064     | CACHD1    | 1 | 64919590 | 7 | 1.240036 |
| rs2230587     | JAK1      | 1 | 65083850 | 3 | 0.106236 |
| rs2230587     | JAK1      | 1 | 65083850 | 2 | 5.105156 |
| rs4582839     | DNAJC6    | 1 | 65633275 | 8 | 4.320283 |
| rs4582839     | DNAJC6    | 1 | 65633275 | 4 | 0.45413  |
| rs4582839     | DNAJC6    | 1 | 65633275 | 5 | 5.188186 |
| rs4915691     | DNAJC6    | 1 | 65640107 | 3 | 0.762272 |
| rs8179183     | LEPR      | 1 | 65848540 | 2 | 4.61974  |
| rs17415296    | LEPR      | 1 | 65871601 | 2 | 4.056121 |
| SNP1-65872910 | LEPR      | 1 | 65872910 | 3 | 0.25124  |
| rs1805096     | LEPR      | 1 | 65874845 | 5 | 0.187612 |
| rs1805096     | LEPR      | 1 | 65874845 | 2 | 6.589531 |
| rs1805096     | LEPR      | 1 | 65874845 | 4 | 3.024048 |
| rs1805096     | LEPR      | 1 | 65874845 | 7 | 1.24065  |
| SNP1-65875343 | LEPR      | 1 | 65875343 | 3 | 0.161287 |
| SNP1-65875343 | LEPR      | 1 | 65875343 | 2 | 4.260604 |
| rs2270866     | LOC645227 | 1 | 66280856 | 4 | 0.565724 |
| rs783036      | PDE4B     | 1 | 66603958 | 7 | 0.105046 |
| rs783036      | PDE4B     | 1 | 66603958 | 5 | 3.154798 |
| rs783036      | PDE4B     | 1 | 66603958 | 1 | 6.31536  |
| rs1886686     | WDR78     | 1 | 67163056 | 1 | 0.45592  |
| rs1886686     | WDR78     | 1 | 67163056 | 3 | 4.34887  |
| rs1495963     | IL12RB2   | 1 | 67567907 | 6 | 0.737615 |
| rs2307145     | IL12RB2   | 1 | 67606115 | 7 | 0.26654  |
| rs4297265     | IL12RB2   | 1 | 67624923 | 3 | 1.177535 |
| rs4297265     | IL12RB2   | 1 | 67624923 | 6 | 0.195753 |
| rs4297265     | IL12RB2   | 1 | 67624923 | 7 | 1.333853 |
| rs2229546     | IL12RB2   | 1 | 67634108 | 6 | 0.214458 |
| rs2229546     | IL12RB2   | 1 | 67634108 | 2 | 2.662135 |
| rs1046852     | GPR177    | 1 | 68363692 | 1 | 4.180219 |
| rs1046852     | GPR177    | 1 | 68363692 | 7 | 1.014269 |
| rs17130529    | GPR177    | 1 | 68386908 | 1 | 0.32079  |
| rs17130529    | GPR177    | 1 | 68386908 | 2 | 1.833297 |
| rs2820489     | LOC645291 | 1 | 68401128 | 6 | 1.996012 |
| rs505292      | LOC391048 | 1 | 70769740 | 7 | 0.766919 |
| rs5682        | PTGER3    | 1 | 71249460 | 2 | 1.884771 |
| rs5680        | PTGER3    | 1 | 71249903 | 3 | 0.201937 |
| rs11583800    | ZRANB2    | 1 | 71309162 | 3 | 0.389036 |

|            |            |   |          |   |          |
|------------|------------|---|----------|---|----------|
| rs17591292 | LRRC44     | 1 | 74418646 | 1 | 3.315745 |
| rs17591292 | LRRC44     | 1 | 74418646 | 3 | 1.068567 |
| rs11806946 | LRRC44     | 1 | 74436297 | 3 | 1.00544  |
| rs11806946 | LRRC44     | 1 | 74436297 | 4 | 0.902698 |
| rs11806946 | LRRC44     | 1 | 74436297 | 2 | 3.848141 |
| rs1412825  | LRRC44     | 1 | 74436402 | 4 | 2.07826  |
| rs1412825  | LRRC44     | 1 | 74436402 | 2 | 4.181613 |
| rs1412825  | LRRC44     | 1 | 74436402 | 5 | 0.997    |
| rs1412825  | LRRC44     | 1 | 74436402 | 3 | 1.401008 |
| rs12723334 | C1orf173   | 1 | 74810433 | 1 | 0.688614 |
| rs11210490 | C1orf173   | 1 | 74870014 | 1 | 3.238586 |
| rs1948874  | SLC44A5    | 1 | 75444964 | 8 | 0.610882 |
| rs1948874  | SLC44A5    | 1 | 75444964 | 4 | 0.282692 |
| rs12703    | RABGGTB    | 1 | 76030480 | 5 | 0.084441 |
| rs12703    | RABGGTB    | 1 | 76030480 | 6 | 0.937562 |
| rs5745325  | MSH4       | 1 | 76042048 | 4 | 0.261175 |
| rs5745325  | MSH4       | 1 | 76042048 | 7 | 0.012282 |
| rs5745325  | MSH4       | 1 | 76042048 | 1 | 0.541824 |
| rs5745325  | MSH4       | 1 | 76042048 | 5 | 0.418979 |
| rs879268   | LOC729766  | 1 | 76245527 | 3 | 0.321074 |
| rs1184626  | ST6GALNAC3 | 1 | 76865768 | 2 | 0.2811   |
| rs1184626  | ST6GALNAC3 | 1 | 76865768 | 1 | 0.478717 |
| rs12403583 | ST6GALNAC3 | 1 | 76867943 | 1 | 0.639214 |
| rs12403583 | ST6GALNAC3 | 1 | 76867943 | 7 | 0.215679 |
| rs41291532 | ST6GALNAC3 | 1 | 76869210 | 2 | 2.07096  |
| rs41291532 | ST6GALNAC3 | 1 | 76869210 | 1 | 0.683229 |
| rs2689674  | hCG_22804  | 1 | 77367162 | 6 | 5.320572 |
| rs1619903  | AK5        | 1 | 77521252 | 1 | 0.430103 |
| rs1619903  | AK5        | 1 | 77521252 | 2 | 0.786402 |
| rs1619903  | AK5        | 1 | 77521252 | 3 | 0.047043 |
| rs2689680  | AK5        | 1 | 77521374 | 1 | 0.413816 |
| rs2689680  | AK5        | 1 | 77521374 | 7 | 0.99631  |
| rs2689680  | AK5        | 1 | 77521374 | 5 | 3.590686 |
| rs2689680  | AK5        | 1 | 77521374 | 3 | 1.391624 |
| rs10873950 | AK5        | 1 | 77797190 | 1 | 3.305157 |
| rs10873950 | AK5        | 1 | 77797190 | 7 | 0.974912 |
| rs4949811  | AK5        | 1 | 77798042 | 1 | 6.517399 |
| rs3509     | AK5        | 1 | 77798139 | 7 | 0.258184 |
| rs3509     | AK5        | 1 | 77798139 | 1 | 3.911625 |
| rs273240   | IFI44L     | 1 | 78858751 | 5 | 1.941232 |
| rs273240   | IFI44L     | 1 | 78858751 | 6 | 1.21801  |
| rs1057920  | IFI44L     | 1 | 78884279 | 6 | 0.16582  |
| rs1057920  | IFI44L     | 1 | 78884279 | 5 | 0.356786 |
| rs1057920  | IFI44L     | 1 | 78884279 | 1 | 3.62646  |
| rs11163290 | LOC729817  | 1 | 81665573 | 3 | 0.308997 |
| rs1108500  | LOC646555  | 1 | 81741872 | 3 | 4.57411  |
| rs1108500  | LOC646555  | 1 | 81741872 | 1 | 5.64254  |

|               |           |   |          |   |          |
|---------------|-----------|---|----------|---|----------|
| rs17131763    | LOC729828 | 1 | 81960734 | 7 | 3.833809 |
| rs17131763    | LOC729828 | 1 | 81960734 | 5 | 3.201144 |
| rs10782824    | PRKACB    | 1 | 84443172 | 6 | 3.117911 |
| rs10782824    | PRKACB    | 1 | 84443172 | 5 | 0.036801 |
| rs10782824    | PRKACB    | 1 | 84443172 | 3 | 0.346015 |
| rs17131308    | PRKACB    | 1 | 84475062 | 5 | 0.455386 |
| rs17131635    | UOX       | 1 | 84608287 | 1 | 0.678654 |
| rs17131635    | UOX       | 1 | 84608287 | 4 | 0.028575 |
| rs17131635    | UOX       | 1 | 84608287 | 5 | 0.298471 |
| rs7511984     | DNASE2B   | 1 | 84650816 | 5 | 0.568166 |
| rs3768250     | DNASE2B   | 1 | 84652968 | 4 | 1.441808 |
| rs3768250     | DNASE2B   | 1 | 84652968 | 1 | 3.67247  |
| rs3768250     | DNASE2B   | 1 | 84652968 | 5 | 0.231844 |
| rs2292191     | BXDC5     | 1 | 84717577 | 1 | 3.787964 |
| rs2292191     | BXDC5     | 1 | 84717577 | 8 | 0.24567  |
| rs2292191     | BXDC5     | 1 | 84717577 | 3 | 0.166084 |
| rs7528067     | BXDC5     | 1 | 84733696 | 1 | 4.809481 |
| rs1043493     | CTBS      | 1 | 84793237 | 1 | 6.43488  |
| rs1043493     | CTBS      | 1 | 84793237 | 8 | 6.290016 |
| rs2994949     | SSX2IP    | 1 | 84885791 | 1 | 2.709448 |
| rs2994949     | SSX2IP    | 1 | 84885791 | 4 | 0.820495 |
| rs7522239     | MCOLN3    | 1 | 85256954 | 5 | 0.69426  |
| rs2028304     | MCOLN3    | 1 | 85260618 | 5 | 6.448435 |
| rs2028304     | MCOLN3    | 1 | 85260618 | 8 | 1.841291 |
| rs709783      | WDR63     | 1 | 85367054 | 6 | 2.65173  |
| SNP1-85428504 | SYDE2     | 1 | 85428504 | 4 | 0.038095 |
| rs1060846     | BCL10     | 1 | 85504653 | 3 | 0.011562 |
| rs1060846     | BCL10     | 1 | 85504653 | 7 | 0.087641 |
| rs1060846     | BCL10     | 1 | 85504653 | 4 | 1.364062 |
| rs1060846     | BCL10     | 1 | 85504653 | 5 | 6.884511 |
| rs1060843     | BCL10     | 1 | 85514745 | 3 | 0.538732 |
| rs1060843     | BCL10     | 1 | 85514745 | 1 | 3.926981 |
| rs1155520     | LOC646626 | 1 | 85516040 | 4 | 1.742967 |
| rs1155520     | LOC646626 | 1 | 85516040 | 7 | 2.316196 |
| rs1155520     | LOC646626 | 1 | 85516040 | 5 | 0.608903 |
| rs1155520     | LOC646626 | 1 | 85516040 | 1 | 1.048688 |
| rs2735592     | LOC646626 | 1 | 85516329 | 7 | 3.101561 |
| rs641712      | COL24A1   | 1 | 86260820 | 5 | 2.69437  |
| rs641712      | COL24A1   | 1 | 86260820 | 1 | 2.74087  |
| rs641712      | COL24A1   | 1 | 86260820 | 2 | 2.43143  |
| rs11161830    | CLCA2     | 1 | 86677176 | 5 | 6.669472 |
| rs11161830    | CLCA2     | 1 | 86677176 | 1 | 6.194753 |
| rs2734705     | CLCA1     | 1 | 86724912 | 1 | 0.022852 |
| rs2734705     | CLCA1     | 1 | 86724912 | 2 | 0.545465 |
| rs2734705     | CLCA1     | 1 | 86724912 | 5 | 0.564661 |
| rs1517903     | CLCA3     | 1 | 86886833 | 3 | 2.054826 |
| rs754001      | 15-Sep    | 1 | 87152574 | 1 | 2.26263  |

|            |           |   |          |   |          |
|------------|-----------|---|----------|---|----------|
| rs754001   | 15-Sep    | 1 | 87152574 | 4 | 0.4753   |
| rs754001   | 15-Sep    | 1 | 87152574 | 2 | 2.732494 |
| rs754001   | 15-Sep    | 1 | 87152574 | 5 | 2.623696 |
| rs101028   | 15-Sep    | 1 | 87152584 | 5 | 2.84694  |
| rs101028   | 15-Sep    | 1 | 87152584 | 1 | 2.458029 |
| rs101028   | 15-Sep    | 1 | 87152584 | 2 | 2.965108 |
| rs6686259  | LOC339524 | 1 | 87370705 | 5 | 2.102535 |
| rs6686259  | LOC339524 | 1 | 87370705 | 1 | 3.174292 |
| rs6686259  | LOC339524 | 1 | 87370705 | 3 | 3.720229 |
| rs430600   | PKN2      | 1 | 88998564 | 2 | 3.206359 |
| rs430600   | PKN2      | 1 | 88998564 | 5 | 0.09298  |
| rs430600   | PKN2      | 1 | 88998564 | 7 | 0.10686  |
| rs430600   | PKN2      | 1 | 88998564 | 8 | 10.11023 |
| rs4658360  | GBP6      | 1 | 89619999 | 5 | 0.398723 |
| rs4658360  | GBP6      | 1 | 89619999 | 4 | 0.170101 |
| rs4658360  | GBP6      | 1 | 89619999 | 3 | 0.757045 |
| rs4658360  | GBP6      | 1 | 89619999 | 1 | 0.422539 |
| rs4658146  | GBP6      | 1 | 89620032 | 2 | 2.099616 |
| rs4658146  | GBP6      | 1 | 89620032 | 1 | 2.521693 |
| rs4658146  | GBP6      | 1 | 89620032 | 5 | 1.876241 |
| rs4658146  | GBP6      | 1 | 89620032 | 3 | 1.854054 |
| rs4658146  | GBP6      | 1 | 89620032 | 4 | 1.501616 |
| rs959460   | GBP6      | 1 | 89622330 | 6 | 0.469901 |
| rs959460   | GBP6      | 1 | 89622330 | 3 | 0.7892   |
| rs3795832  | LRRC8B    | 1 | 89822203 | 3 | 4.2525   |
| rs3795832  | LRRC8B    | 1 | 89822203 | 5 | 2.908741 |
| rs3795832  | LRRC8B    | 1 | 89822203 | 1 | 4.281515 |
| rs3795832  | LRRC8B    | 1 | 89822203 | 4 | 3.342416 |
| rs3795832  | LRRC8B    | 1 | 89822203 | 7 | 4.432333 |
| rs3795832  | LRRC8B    | 1 | 89822203 | 8 | 3.785277 |
| rs3795832  | LRRC8B    | 1 | 89822203 | 6 | 3.997247 |
| rs3795832  | LRRC8B    | 1 | 89822203 | 2 | 4.546186 |
| rs2703984  | LOC492303 | 1 | 90232332 | 3 | 0.283094 |
| rs11808927 | ZNF326    | 1 | 90243503 | 7 | 0.541011 |
| rs11808927 | ZNF326    | 1 | 90243503 | 3 | 0.159162 |
| rs3893101  | LOC645931 | 1 | 91567082 | 8 | 4.453613 |
| rs3893101  | LOC645931 | 1 | 91567082 | 2 | 5.059033 |
| rs13447455 | CDC7      | 1 | 91739033 | 8 | 0.833104 |
| rs1804506  | TGFBR3    | 1 | 91920601 | 1 | 0.872687 |
| rs1804506  | TGFBR3    | 1 | 91920601 | 3 | 0.869503 |
| rs284878   | TGFBR3    | 1 | 91946848 | 5 | 0.071784 |
| rs1805113  | TGFBR3    | 1 | 91950526 | 2 | 3.00525  |
| rs1805113  | TGFBR3    | 1 | 91950526 | 4 | 0.95007  |
| rs1805112  | TGFBR3    | 1 | 91958245 | 7 | 0.252698 |
| rs1805112  | TGFBR3    | 1 | 91958245 | 3 | 1.320079 |
| rs1805112  | TGFBR3    | 1 | 91958245 | 2 | 1.54342  |
| rs1805110  | TGFBR3    | 1 | 92099633 | 1 | 1.662864 |

|            |         |   |          |   |          |
|------------|---------|---|----------|---|----------|
| rs1325432  | GFI1    | 1 | 92713438 | 5 | 3.602822 |
| rs1886683  | EVI5    | 1 | 92748611 | 7 | 2.951095 |
| rs1886683  | EVI5    | 1 | 92748611 | 1 | 0.394974 |
| rs1886683  | EVI5    | 1 | 92748611 | 2 | 2.92382  |
| rs1886683  | EVI5    | 1 | 92748611 | 5 | 7.178178 |
| rs6690764  | EVI5    | 1 | 92749178 | 8 | 4.207498 |
| rs6690764  | EVI5    | 1 | 92749178 | 5 | 0.254003 |
| rs6690764  | EVI5    | 1 | 92749178 | 1 | 0.857603 |
| rs1886682  | EVI5    | 1 | 92749863 | 5 | 0.49594  |
| rs1886682  | EVI5    | 1 | 92749863 | 1 | 0.99858  |
| rs6603979  | EVI5    | 1 | 92751942 | 1 | 0.411833 |
| rs6603979  | EVI5    | 1 | 92751942 | 5 | 5.994468 |
| rs6603979  | EVI5    | 1 | 92751942 | 7 | 0.166044 |
| rs6603979  | EVI5    | 1 | 92751942 | 2 | 0.144234 |
| rs6603979  | EVI5    | 1 | 92751942 | 8 | 1.876722 |
| rs10874744 | SNORA66 | 1 | 93078905 | 5 | 0.145138 |
| rs10874744 | SNORA66 | 1 | 93078905 | 3 | 1.092708 |
| rs10874744 | SNORA66 | 1 | 93078905 | 1 | 5.347147 |
| rs10874744 | SNORA66 | 1 | 93078905 | 7 | 1.146043 |
| rs10874767 | CCDC18  | 1 | 93516643 | 7 | 0.025674 |
| rs10874767 | CCDC18  | 1 | 93516643 | 4 | 2.222923 |
| rs2235971  | DNTTIP2 | 1 | 94117304 | 3 | 0.543485 |
| rs2235971  | DNTTIP2 | 1 | 94117304 | 4 | 6.103286 |
| rs3747961  | ABCA4   | 1 | 94231009 | 1 | 3.795111 |
| rs3747961  | ABCA4   | 1 | 94231009 | 3 | 0.414279 |
| rs3747961  | ABCA4   | 1 | 94231009 | 4 | 1.145112 |
| rs6666652  | ABCA4   | 1 | 94234305 | 3 | 1.475844 |
| rs6666652  | ABCA4   | 1 | 94234305 | 4 | 0.969084 |
| rs1762114  | ABCA4   | 1 | 94243663 | 3 | 1.201471 |
| rs1762114  | ABCA4   | 1 | 94243663 | 4 | 0.336091 |
| rs2275029  | ABCA4   | 1 | 94246433 | 7 | 0.896629 |
| rs2275029  | ABCA4   | 1 | 94246433 | 5 | 0.820399 |
| rs1801574  | ABCA4   | 1 | 94248976 | 6 | 0.688289 |
| rs1801574  | ABCA4   | 1 | 94248976 | 5 | 3.039806 |
| rs1801574  | ABCA4   | 1 | 94248976 | 7 | 0.515321 |
| rs1801574  | ABCA4   | 1 | 94248976 | 1 | 3.648099 |
| rs1801466  | ABCA4   | 1 | 94249055 | 1 | 1.213688 |
| rs3354     | F3      | 1 | 94768407 | 1 | 2.514614 |
| rs3354     | F3      | 1 | 94768407 | 2 | 5.648882 |
| rs6577322  | SNX7    | 1 | 98937022 | 4 | 0.200972 |
| rs6577322  | SNX7    | 1 | 98937022 | 5 | 0.661955 |
| rs6577322  | SNX7    | 1 | 98937022 | 3 | 1.071662 |
| rs764051   | PAP2D   | 1 | 99129546 | 7 | 1.498837 |
| rs309087   | PAP2D   | 1 | 99191235 | 5 | 0.016981 |
| rs3818852  | PALMD   | 1 | 99932765 | 5 | 0.333046 |
| rs3818852  | PALMD   | 1 | 99932765 | 3 | 0.463759 |
| rs7537296  | FRRS1   | 1 | 99976236 | 1 | 0.54243  |

|                |           |   |           |   |          |
|----------------|-----------|---|-----------|---|----------|
| rs7537296      | FRRS1     | 1 | 99976236  | 3 | 1.26081  |
| rs7514021      | FRRS1     | 1 | 99976281  | 1 | 0.057273 |
| rs7514021      | FRRS1     | 1 | 99976281  | 3 | 0.406805 |
| rs7514021      | FRRS1     | 1 | 99976281  | 2 | 1.967955 |
| rs1416236      | FRRS1     | 1 | 99987075  | 1 | 1.279894 |
| rs1416236      | FRRS1     | 1 | 99987075  | 3 | 1.00268  |
| rs1416236      | FRRS1     | 1 | 99987075  | 2 | 1.030854 |
| rs687513       | CCDC76    | 1 | 100371455 | 4 | 0.904581 |
| rs614805       | LOC646970 | 1 | 100570061 | 8 | 2.292899 |
| rs614805       | LOC646970 | 1 | 100570061 | 3 | 3.104918 |
| rs614805       | LOC646970 | 1 | 100570061 | 6 | 7.286343 |
| rs614805       | LOC646970 | 1 | 100570061 | 5 | 1.865915 |
| rs614805       | LOC646970 | 1 | 100570061 | 4 | 2.57424  |
| rs614805       | LOC646970 | 1 | 100570061 | 7 | 3.162329 |
| rs7534479      | LOC646970 | 1 | 100570725 | 3 | 2.434016 |
| rs7534479      | LOC646970 | 1 | 100570725 | 7 | 1.538149 |
| rs7534479      | LOC646970 | 1 | 100570725 | 1 | 2.512765 |
| rs529224       | CDC14A    | 1 | 100590766 | 7 | 0.024944 |
| rs529224       | CDC14A    | 1 | 100590766 | 6 | 0.837888 |
| rs529224       | CDC14A    | 1 | 100590766 | 5 | 0.265287 |
| rs529224       | CDC14A    | 1 | 100590766 | 1 | 2.171384 |
| rs529224       | CDC14A    | 1 | 100590766 | 3 | 0.135685 |
| rs3737578      | EDG1      | 1 | 101477084 | 4 | 0.570566 |
| rs3737578      | EDG1      | 1 | 101477084 | 1 | 1.589609 |
| rs3737577      | EDG1      | 1 | 101477120 | 1 | 0.001373 |
| rs3737577      | EDG1      | 1 | 101477120 | 2 | 1.817737 |
| rs3737577      | EDG1      | 1 | 101477120 | 3 | 0.50044  |
| rs3737577      | EDG1      | 1 | 101477120 | 6 | 0.628    |
| rs3737577      | EDG1      | 1 | 101477120 | 5 | 1.360035 |
| rs2229783      | COL11A1   | 1 | 103125039 | 4 | 1.253948 |
| rs2229783      | COL11A1   | 1 | 103125039 | 3 | 0.314417 |
| rs2229783      | COL11A1   | 1 | 103125039 | 2 | 4.42265  |
| rs12731843     | COL11A1   | 1 | 103264049 | 5 | 0.837491 |
| rs10881350     | LOC727839 | 1 | 106233900 | 3 | 1.055855 |
| rs10881350     | LOC727839 | 1 | 106233900 | 1 | 1.929182 |
| rs10881350     | LOC727839 | 1 | 106233900 | 8 | 2.917247 |
| rs2232016      | PRMT6     | 1 | 107401441 | 5 | 0.829677 |
| rs2232016      | PRMT6     | 1 | 107401441 | 2 | 1.32326  |
| rs2232016      | PRMT6     | 1 | 107401441 | 1 | 0.526639 |
| rs2232016      | PRMT6     | 1 | 107401441 | 4 | 1.231771 |
| rs8458         | VAV3      | 1 | 107915379 | 8 | 5.135352 |
| rs8458         | VAV3      | 1 | 107915379 | 2 | 0.669931 |
| rs8458         | VAV3      | 1 | 107915379 | 5 | 0.875975 |
| rs8458         | VAV3      | 1 | 107915379 | 6 | 0.234247 |
| rs8458         | VAV3      | 1 | 107915379 | 1 | 1.080192 |
| SNP1-107986832 | VAV3      | 1 | 107986832 | 4 | 0.801141 |
| rs7528153      | VAV3      | 1 | 108109250 | 2 | 5.202136 |

|                |          |   |           |   |          |
|----------------|----------|---|-----------|---|----------|
| rs7528153      | VAV3     | 1 | 108109250 | 4 | 0.228109 |
| rs7528153      | VAV3     | 1 | 108109250 | 8 | 3.361494 |
| rs2358529      | FAM102B  | 1 | 108981561 | 7 | 4.177221 |
| rs11582005     | FNDC7    | 1 | 109069964 | 5 | 0.279319 |
| rs11582005     | FNDC7    | 1 | 109069964 | 1 | 2.619858 |
| SNP1-109070096 | FNDC7    | 1 | 109070096 | 6 | 0.548899 |
| rs4970809      | FNDC7    | 1 | 109074979 | 8 | 0.525478 |
| rs4970809      | FNDC7    | 1 | 109074979 | 1 | 2.586222 |
| rs4970809      | FNDC7    | 1 | 109074979 | 3 | 1.584187 |
| rs4970809      | FNDC7    | 1 | 109074979 | 5 | 0.238654 |
| rs1124427      | NULL     | 1 | 109090876 | 5 | 4.750133 |
| rs11102337     | NULL     | 1 | 109091734 | 5 | 0.407001 |
| rs11102337     | NULL     | 1 | 109091734 | 3 | 0.049724 |
| rs11102337     | NULL     | 1 | 109091734 | 8 | 0.839089 |
| rs11102337     | NULL     | 1 | 109091734 | 1 | 6.548635 |
| rs7522157      | C1orf62  | 1 | 109167809 | 4 | 2.730659 |
| rs7522157      | C1orf62  | 1 | 109167809 | 6 | 4.79981  |
| rs7522157      | C1orf62  | 1 | 109167809 | 1 | 5.706722 |
| rs7522157      | C1orf62  | 1 | 109167809 | 5 | 0.312405 |
| rs7522157      | C1orf62  | 1 | 109167809 | 8 | 1.069785 |
| rs12060255     | C1orf62  | 1 | 109178593 | 4 | 0.002654 |
| rs11580913     | C1orf62  | 1 | 109193185 | 7 | 0.463656 |
| rs17563390     | C1orf62  | 1 | 109196501 | 1 | 3.316071 |
| rs7519409      | C1orf62  | 1 | 109201183 | 1 | 2.789064 |
| rs7551142      | C1orf62  | 1 | 109201233 | 8 | 0.715588 |
| rs667524       | KIAA1324 | 1 | 109458469 | 3 | 0.01542  |
| rs667524       | KIAA1324 | 1 | 109458469 | 7 | 0.241468 |
| rs658779       | KIAA1324 | 1 | 109536821 | 3 | 0.6076   |
| rs659543       | KIAA1324 | 1 | 109536939 | 3 | 0.262676 |
| rs2359244      | KIAA1324 | 1 | 109538655 | 3 | 0.046509 |
| rs913179       | KIAA1324 | 1 | 109544008 | 3 | 0.979056 |
| rs1052878      | KIAA1324 | 1 | 109547141 | 2 | 4.995288 |
| rs2281894      | CELSR2   | 1 | 109612067 | 7 | 5.289938 |
| rs2281894      | CELSR2   | 1 | 109612067 | 5 | 6.449667 |
| SNP1-109619681 | CELSR2   | 1 | 109619681 | 5 | 0.813704 |
| rs3738777      | MYBPHL   | 1 | 109638358 | 8 | 1.272773 |
| rs3738777      | MYBPHL   | 1 | 109638358 | 3 | 0.385044 |
| rs3850615      | MYBPHL   | 1 | 109641261 | 3 | 0.695251 |
| rs6666119      | CYB561D1 | 1 | 109841833 | 3 | 1.146403 |
| rs6666119      | CYB561D1 | 1 | 109841833 | 5 | 6.918326 |
| rs2297797      | CYB561D1 | 1 | 109842203 | 2 | 2.528307 |
| rs2297797      | CYB561D1 | 1 | 109842203 | 4 | 0.547488 |
| rs2297797      | CYB561D1 | 1 | 109842203 | 5 | 0.463076 |
| rs2297797      | CYB561D1 | 1 | 109842203 | 3 | 0.208977 |
| rs2304355      | GNAT2    | 1 | 109957047 | 5 | 0.606557 |
| rs2304355      | GNAT2    | 1 | 109957047 | 8 | 1.232043 |
| rs568686       | AMPD2    | 1 | 109975298 | 6 | 0.381792 |

|                |           |   |           |   |          |
|----------------|-----------|---|-----------|---|----------|
| rs11807        | GSTM5     | 1 | 110062265 | 8 | 3.992089 |
| rs11807        | GSTM5     | 1 | 110062265 | 6 | 0.915764 |
| rs11807        | GSTM5     | 1 | 110062265 | 1 | 3.379385 |
| rs3814309      | GSTM3     | 1 | 110078926 | 7 | 3.529109 |
| rs1537236      | GSTM3     | 1 | 110080495 | 1 | 3.504292 |
| rs1332018      | GSTM3     | 1 | 110084495 | 1 | 2.959525 |
| rs1332018      | GSTM3     | 1 | 110084495 | 3 | 0.684204 |
| rs1332018      | GSTM3     | 1 | 110084495 | 8 | 1.327069 |
| rs3818562      | EPS8L3    | 1 | 110101964 | 7 | 0.719922 |
| rs41281344     | FAM40A    | 1 | 110385780 | 7 | 5.025682 |
| rs2784140      | SLC6A17   | 1 | 110539819 | 3 | 1.254947 |
| rs2784140      | SLC6A17   | 1 | 110539819 | 8 | 2.525435 |
| rs2784140      | SLC6A17   | 1 | 110539819 | 5 | 0.477791 |
| SNP1-110567977 | KCNC4     | 1 | 110567977 | 8 | 10.1413  |
| rs17025562     | KCNC4     | 1 | 110576718 | 1 | 4.718026 |
| rs3738750      | SLC16A4   | 1 | 110725876 | 3 | 0.400105 |
| rs3738750      | SLC16A4   | 1 | 110725876 | 7 | 0.341617 |
| rs3738750      | SLC16A4   | 1 | 110725876 | 2 | 3.247476 |
| rs6698159      | HBXIP     | 1 | 110751800 | 5 | 0.034497 |
| rs6674775      | HBXIP     | 1 | 110751962 | 2 | 0.647751 |
| rs6674775      | HBXIP     | 1 | 110751962 | 3 | 0.478449 |
| rs3748731      | KCNA10    | 1 | 110862534 | 3 | 0.539954 |
| rs3748731      | KCNA10    | 1 | 110862534 | 1 | 0.30025  |
| rs3887820      | KCNA2     | 1 | 110949603 | 1 | 1.562661 |
| rs1494324      | CD53      | 1 | 111217364 | 4 | 0.876426 |
| rs12030938     | CD53      | 1 | 111243381 | 3 | 0.278027 |
| rs12030938     | CD53      | 1 | 111243381 | 6 | 2.703803 |
| rs12030938     | CD53      | 1 | 111243381 | 5 | 0.716948 |
| rs1936939      | CD53      | 1 | 111244078 | 5 | 0.069259 |
| rs1936939      | CD53      | 1 | 111244078 | 8 | 0.109439 |
| rs1936939      | CD53      | 1 | 111244078 | 6 | 0.213905 |
| rs1936939      | CD53      | 1 | 111244078 | 3 | 0.121969 |
| rs1043096      | CEPT1     | 1 | 111483830 | 6 | 4.898082 |
| rs17027410     | CHIA      | 1 | 111663345 | 1 | 2.751402 |
| rs17027410     | CHIA      | 1 | 111663345 | 8 | 2.030055 |
| rs2820092      | CHIA      | 1 | 111663597 | 5 | 1.036451 |
| rs2820092      | CHIA      | 1 | 111663597 | 1 | 2.813656 |
| rs3738303      | C1orf88   | 1 | 111695703 | 6 | 0.906025 |
| rs3738303      | C1orf88   | 1 | 111695703 | 4 | 0.499052 |
| rs9645351      | C1orf88   | 1 | 111696393 | 5 | 0.270036 |
| rs9645351      | C1orf88   | 1 | 111696393 | 7 | 0.261654 |
| rs9645351      | C1orf88   | 1 | 111696393 | 1 | 4.502947 |
| rs1058530      | C1orf88   | 1 | 111697010 | 6 | 1.031485 |
| rs1058530      | C1orf88   | 1 | 111697010 | 1 | 3.567    |
| rs10857881     | LOC441897 | 1 | 111735211 | 1 | 3.883473 |
| rs7825         | OVGP1     | 1 | 111758620 | 6 | 0.090994 |
| rs7825         | OVGP1     | 1 | 111758620 | 5 | 0.541574 |



|                |          |   |           |   |          |
|----------------|----------|---|-----------|---|----------|
| rs7825         | OVGP1    | 1 | 111758620 | 1 | 0.482975 |
| rs7825         | OVGP1    | 1 | 111758620 | 3 | 0.14121  |
| rs17027633     | OVGP1    | 1 | 111763779 | 4 | 0.727241 |
| rs2275794      | OVGP1    | 1 | 111765785 | 4 | 0.343664 |
| rs954739       | OVGP1    | 1 | 111767814 | 2 | 2.348013 |
| rs954739       | OVGP1    | 1 | 111767814 | 1 | 0.704848 |
| rs3754032      | WDR77    | 1 | 111784127 | 5 | 0.426018 |
| rs3754032      | WDR77    | 1 | 111784127 | 1 | 0.247659 |
| rs11548427     | ATP5F1   | 1 | 111793291 | 4 | 0.388548 |
| rs6703267      | C1orf162 | 1 | 111820180 | 1 | 0.587313 |
| rs6703267      | C1orf162 | 1 | 111820180 | 5 | 0.632037 |
| rs1054680      | C1orf162 | 1 | 111822552 | 4 | 0.702651 |
| rs1054680      | C1orf162 | 1 | 111822552 | 2 | 1.418219 |
| rs1054680      | C1orf162 | 1 | 111822552 | 1 | 1.118502 |
| rs1054680      | C1orf162 | 1 | 111822552 | 5 | 4.181073 |
| rs1054680      | C1orf162 | 1 | 111822552 | 3 | 1.308484 |
| rs9025         | ADORA3   | 1 | 111827721 | 5 | 0.046468 |
| rs2275797      | ADORA3   | 1 | 111834808 | 3 | 0.233411 |
| rs1415792      | ADORA3   | 1 | 111843718 | 6 | 3.104461 |
| rs1415792      | ADORA3   | 1 | 111843718 | 3 | 2.126714 |
| rs1415792      | ADORA3   | 1 | 111843718 | 4 | 2.123036 |
| rs1415793      | ADORA3   | 1 | 111843759 | 2 | 2.183857 |
| rs1415793      | ADORA3   | 1 | 111843759 | 4 | 2.051753 |
| rs1415793      | ADORA3   | 1 | 111843759 | 3 | 3.144352 |
| rs1544223      | ADORA3   | 1 | 111848080 | 3 | 0.571737 |
| rs1544223      | ADORA3   | 1 | 111848080 | 2 | 4.297429 |
| rs12033257     | KCND3    | 1 | 112120007 | 8 | 0.630741 |
| rs12033257     | KCND3    | 1 | 112120007 | 7 | 0.661429 |
| rs2273368      | WNT2B    | 1 | 112865294 | 1 | 4.678391 |
| rs2273368      | WNT2B    | 1 | 112865294 | 7 | 0.248192 |
| rs2273368      | WNT2B    | 1 | 112865294 | 4 | 3.107668 |
| SNP1-113056171 | PPM1J    | 1 | 113056171 | 3 | 0.157565 |
| rs11803863     | LRIG2    | 1 | 113437384 | 6 | 0.957783 |
| SNP1-114026829 | MAGI3    | 1 | 114026829 | 1 | 7.059721 |
| SNP1-114026829 | MAGI3    | 1 | 114026829 | 3 | 1.085571 |
| SNP1-114026829 | MAGI3    | 1 | 114026829 | 6 | 3.713586 |
| SNP1-114028398 | MAGI3    | 1 | 114028398 | 4 | 1.137101 |
| SNP1-114029805 | MAGI3    | 1 | 114029805 | 6 | 1.518728 |
| SNP1-114029805 | MAGI3    | 1 | 114029805 | 3 | 0.234846 |
| rs3811021      | PTPN22   | 1 | 114158186 | 5 | 2.11748  |
| rs1217382      | BCL2L15  | 1 | 114225176 | 1 | 2.082459 |
| rs12022378     | DCLRE1B  | 1 | 114249912 | 6 | 0.640577 |
| SNP1-114257324 | DCLRE1B  | 1 | 114257324 | 1 | 5.44285  |
| rs6674384      | DCLRE1B  | 1 | 114257430 | 2 | 1.706399 |
| SNP1-114306523 | HIPK1    | 1 | 114306523 | 2 | 5.067377 |
| SNP1-114306523 | HIPK1    | 1 | 114306523 | 8 | 0.177409 |
| rs1125002      | TRIM33   | 1 | 114739698 | 4 | 2.307983 |

|            |              |   |           |   |          |
|------------|--------------|---|-----------|---|----------|
| rs12083584 | TRIM33       | 1 | 114774952 | 1 | 0.898883 |
| rs12083584 | TRIM33       | 1 | 114774952 | 6 | 0.255748 |
| rs11084    | SYCP1        | 1 | 115339456 | 1 | 1.539155 |
| rs11084    | SYCP1        | 1 | 115339456 | 5 | 2.311271 |
| rs1052480  | TSPAN2       | 1 | 115392581 | 5 | 1.681492 |
| rs1052480  | TSPAN2       | 1 | 115392581 | 6 | 1.972802 |
| rs1052480  | TSPAN2       | 1 | 115392581 | 1 | 1.998948 |
| rs7551034  | TSPAN2       | 1 | 115392686 | 6 | 3.900042 |
| rs7551034  | TSPAN2       | 1 | 115392686 | 5 | 1.289336 |
| rs7551034  | TSPAN2       | 1 | 115392686 | 2 | 0.524135 |
| rs7551034  | TSPAN2       | 1 | 115392686 | 7 | 0.256007 |
| rs10776795 | TSPAN2       | 1 | 115406321 | 1 | 3.802466 |
| rs10776795 | TSPAN2       | 1 | 115406321 | 3 | 0.918974 |
| rs6330     | NGFB         | 1 | 115630836 | 7 | 1.644368 |
| rs3204955  | VANGL1       | 1 | 116036800 | 1 | 6.011397 |
| rs4839472  | VANGL1       | 1 | 116039019 | 1 | 4.586452 |
| rs4839472  | VANGL1       | 1 | 116039019 | 7 | 0.507709 |
| rs17034226 | VANGL1       | 1 | 116040001 | 7 | 7.563167 |
| rs17034226 | VANGL1       | 1 | 116040001 | 3 | 0.399538 |
| rs17034226 | VANGL1       | 1 | 116040001 | 1 | 3.757728 |
| rs17034226 | VANGL1       | 1 | 116040001 | 4 | 1.40114  |
| rs4548441  | VANGL1       | 1 | 116041364 | 7 | 0.364314 |
| rs4548441  | VANGL1       | 1 | 116041364 | 1 | 5.284907 |
| rs4548441  | VANGL1       | 1 | 116041364 | 3 | 1.449269 |
| rs4548441  | VANGL1       | 1 | 116041364 | 4 | 0.483841 |
| rs4548441  | VANGL1       | 1 | 116041364 | 8 | 7.013208 |
| rs7413162  | CASQ2        | 1 | 116045400 | 4 | 0.014719 |
| rs7413162  | CASQ2        | 1 | 116045400 | 1 | 2.198802 |
| rs10754377 | NHLH2        | 1 | 116181695 | 7 | 0.69897  |
| rs10754377 | NHLH2        | 1 | 116181695 | 5 | 0.846903 |
| rs2488429  | SLC22A15     | 1 | 116371053 | 2 | 3.113719 |
| rs3748743  | SLC22A15     | 1 | 116406946 | 2 | 5.368914 |
| rs3748742  | SLC22A15     | 1 | 116410708 | 8 | 0.888321 |
| rs3748742  | SLC22A15     | 1 | 116410708 | 2 | 4.158917 |
| rs3748741  | SLC22A15     | 1 | 116411356 | 8 | 0.123832 |
| rs3748741  | SLC22A15     | 1 | 116411356 | 2 | 4.966056 |
| rs10802159 | C1orf161     | 1 | 116477558 | 8 | 0.902362 |
| rs6670668  | C1orf161     | 1 | 116478071 | 8 | 0.129624 |
| rs1034919  | RP4-781D12.3 | 1 | 116877028 | 7 | 0.695572 |
| rs1034919  | RP4-781D12.3 | 1 | 116877028 | 6 | 0.155114 |
| rs1034919  | RP4-781D12.3 | 1 | 116877028 | 5 | 1.909756 |
| rs1034919  | RP4-781D12.3 | 1 | 116877028 | 1 | 3.119499 |
| rs1034920  | RP4-781D12.3 | 1 | 116877922 | 7 | 0.345937 |
| rs1034920  | RP4-781D12.3 | 1 | 116877922 | 6 | 1.770194 |
| rs1034920  | RP4-781D12.3 | 1 | 116877922 | 1 | 2.124384 |
| rs1034920  | RP4-781D12.3 | 1 | 116877922 | 5 | 0.963288 |
| rs1034921  | RP4-781D12.3 | 1 | 116877926 | 5 | 0.000289 |

|                |              |   |           |   |          |
|----------------|--------------|---|-----------|---|----------|
| rs1034921      | RP4-781D12.3 | 1 | 116877926 | 1 | 2.793352 |
| rs1034921      | RP4-781D12.3 | 1 | 116877926 | 7 | 0.091294 |
| rs1034921      | RP4-781D12.3 | 1 | 116877926 | 6 | 0.074253 |
| rs9887785      | GAPDHL9      | 1 | 117058220 | 3 | 1.615283 |
| rs12408586     | LOC339396    | 1 | 117084250 | 7 | 1.291588 |
| rs12408586     | LOC339396    | 1 | 117084250 | 5 | 1.421405 |
| SNP1-117305463 | PTGFRN       | 1 | 117305463 | 2 | 4.383496 |
| rs7554376      | IGSF2        | 1 | 117354083 | 7 | 1.902637 |
| rs2249265      | IGSF2        | 1 | 117361249 | 1 | 4.011861 |
| rs3736907      | IGSF2        | 1 | 117362452 | 4 | 2.802331 |
| rs3736907      | IGSF2        | 1 | 117362452 | 7 | 8.210757 |
| rs3736907      | IGSF2        | 1 | 117362452 | 5 | 1.531545 |
| SNP1-117369740 | IGSF2        | 1 | 117369740 | 8 | 3.786875 |
| rs2244501      | TTF2         | 1 | 117404483 | 3 | 0.835953 |
| rs2244501      | TTF2         | 1 | 117404483 | 7 | 1.676475 |
| rs2244501      | TTF2         | 1 | 117404483 | 4 | 0.990708 |
| rs12118664     | TRIM45       | 1 | 117456161 | 1 | 3.96127  |
| rs12118664     | TRIM45       | 1 | 117456161 | 7 | 0.619056 |
| rs12118664     | TRIM45       | 1 | 117456161 | 5 | 0.175943 |
| rs1048635      | TRIM45       | 1 | 117456381 | 6 | 1.397897 |
| rs1289658      | TRIM45       | 1 | 117457611 | 5 | 4.656324 |
| rs1289658      | TRIM45       | 1 | 117457611 | 1 | 2.057301 |
| rs1289658      | TRIM45       | 1 | 117457611 | 6 | 0.26624  |
| rs1289658      | TRIM45       | 1 | 117457611 | 7 | 0.640206 |
| rs749902       | TRIM45       | 1 | 117462277 | 7 | 0.046469 |
| rs749902       | TRIM45       | 1 | 117462277 | 5 | 11.21362 |
| rs749902       | TRIM45       | 1 | 117462277 | 1 | 3.721762 |
| rs6657335      | TRIM45       | 1 | 117465569 | 5 | 0.155899 |
| rs6657335      | TRIM45       | 1 | 117465569 | 1 | 4.159678 |
| rs6657335      | TRIM45       | 1 | 117465569 | 7 | 0.834008 |
| rs34957002     | VTCN1        | 1 | 117554978 | 7 | 0.330978 |
| rs12120771     | MAN1A2       | 1 | 117867442 | 7 | 0.182233 |
| rs12120771     | MAN1A2       | 1 | 117867442 | 8 | 7.378869 |
| rs865443       | FAM46C       | 1 | 117967100 | 5 | 0.536182 |
| rs1627787      | FAM46C       | 1 | 117967496 | 5 | 6.29035  |
| rs1627787      | FAM46C       | 1 | 117967496 | 4 | 1.12106  |
| rs1627787      | FAM46C       | 1 | 117967496 | 1 | 5.338911 |
| rs2066411      | FAM46C       | 1 | 117968273 | 5 | 0.403051 |
| rs2066411      | FAM46C       | 1 | 117968273 | 7 | 0.516827 |
| rs2066411      | FAM46C       | 1 | 117968273 | 1 | 4.112434 |
| rs2066411      | FAM46C       | 1 | 117968273 | 4 | 0.792323 |
| rs10923360     | FAM46C       | 1 | 117968400 | 6 | 2.612854 |
| rs10923360     | FAM46C       | 1 | 117968400 | 7 | 0.600544 |
| rs10923360     | FAM46C       | 1 | 117968400 | 8 | 3.86217  |
| rs10923360     | FAM46C       | 1 | 117968400 | 2 | 0.355848 |
| rs10923360     | FAM46C       | 1 | 117968400 | 1 | 1.064392 |
| rs826403       | FAM46C       | 1 | 117968722 | 1 | 0.782128 |

|            |           |   |           |   |          |
|------------|-----------|---|-----------|---|----------|
| rs826403   | FAM46C    | 1 | 117968722 | 8 | 0.12709  |
| rs826403   | FAM46C    | 1 | 117968722 | 7 | 1.372985 |
| rs826403   | FAM46C    | 1 | 117968722 | 2 | 2.432907 |
| rs826403   | FAM46C    | 1 | 117968722 | 5 | 0.914242 |
| rs826403   | FAM46C    | 1 | 117968722 | 6 | 0.6525   |
| rs866111   | FAM46C    | 1 | 117969176 | 2 | 5.086132 |
| rs866111   | FAM46C    | 1 | 117969176 | 5 | 0.471582 |
| rs11580608 | FAM46C    | 1 | 117969757 | 8 | 0.100244 |
| rs11580608 | FAM46C    | 1 | 117969757 | 1 | 4.262335 |
| rs11580608 | FAM46C    | 1 | 117969757 | 6 | 0.739284 |
| rs11580608 | FAM46C    | 1 | 117969757 | 5 | 0.371491 |
| rs11580608 | FAM46C    | 1 | 117969757 | 7 | 0.02639  |
| rs11581122 | FAM46C    | 1 | 117970349 | 4 | 1.002915 |
| rs11581122 | FAM46C    | 1 | 117970349 | 1 | 4.609146 |
| rs11581122 | FAM46C    | 1 | 117970349 | 7 | 1.598448 |
| rs2282456  | FAM46C    | 1 | 117970986 | 1 | 6.130249 |
| rs2282456  | FAM46C    | 1 | 117970986 | 8 | 4.728279 |
| rs2282456  | FAM46C    | 1 | 117970986 | 5 | 0.423282 |
| rs2282456  | FAM46C    | 1 | 117970986 | 6 | 0.194271 |
| rs2282456  | FAM46C    | 1 | 117970986 | 7 | 0.304881 |
| rs10754367 | SPAG17    | 1 | 118445953 | 1 | 2.336976 |
| rs10754367 | SPAG17    | 1 | 118445953 | 8 | 0.374267 |
| rs10494217 | TBX15     | 1 | 119270711 | 5 | 0.38396  |
| rs8928     | WARS2     | 1 | 119375597 | 1 | 3.85743  |
| rs8928     | WARS2     | 1 | 119375597 | 7 | 0.588232 |
| rs3790548  | WARS2     | 1 | 119376820 | 2 | 2.167348 |
| rs346683   | LOC644237 | 1 | 119940454 | 7 | 0.755857 |
| rs346683   | LOC644237 | 1 | 119940454 | 5 | 0.836279 |
| rs6689350  | LOC391081 | 1 | 119953605 | 1 | 1.517546 |
| rs6689350  | LOC391081 | 1 | 119953605 | 2 | 2.090272 |
| rs6689350  | LOC391081 | 1 | 119953605 | 6 | 1.082312 |
| rs6689350  | LOC391081 | 1 | 119953605 | 3 | 2.124212 |
| rs6689350  | LOC391081 | 1 | 119953605 | 4 | 1.001565 |
| rs6689350  | LOC391081 | 1 | 119953605 | 5 | 0.826089 |
| rs12067843 | ZNF697    | 1 | 119968204 | 4 | 1.75739  |
| rs12067843 | ZNF697    | 1 | 119968204 | 5 | 2.673321 |
| rs1052972  | REG4      | 1 | 120138308 | 4 | 2.104044 |
| rs1052972  | REG4      | 1 | 120138308 | 5 | 2.091946 |
| rs1052972  | REG4      | 1 | 120138308 | 3 | 2.082953 |
| rs1052972  | REG4      | 1 | 120138308 | 6 | 2.153118 |
| rs699778   | REG4      | 1 | 120138399 | 3 | 0.553595 |
| rs699778   | REG4      | 1 | 120138399 | 4 | 0.048204 |
| rs699778   | REG4      | 1 | 120138399 | 6 | 0.138236 |
| rs699778   | REG4      | 1 | 120138399 | 5 | 0.645407 |
| rs835575   | NOTCH2    | 1 | 120258086 | 6 | 5.742575 |
| rs11590105 | ITGA10    | 1 | 144244532 | 3 | 0.950322 |
| rs11590105 | ITGA10    | 1 | 144244532 | 4 | 0.565728 |

|                |           |   |           |   |          |
|----------------|-----------|---|-----------|---|----------|
| rs2282014      | ITGA10    | 1 | 144253638 | 7 | 7.245645 |
| rs6670984      | ANKRD35   | 1 | 144272951 | 3 | 1.916878 |
| rs11579366     | ANKRD35   | 1 | 144273650 | 3 | 0.253901 |
| rs11584787     | PRKAB2    | 1 | 145095103 | 8 | 0.873075 |
| rs11584787     | PRKAB2    | 1 | 145095103 | 7 | 0.039506 |
| rs11584787     | PRKAB2    | 1 | 145095103 | 6 | 0.026591 |
| rs11584787     | PRKAB2    | 1 | 145095103 | 3 | 0.003711 |
| rs11584787     | PRKAB2    | 1 | 145095103 | 4 | 0.446762 |
| rs11584787     | PRKAB2    | 1 | 145095103 | 1 | 6.377102 |
| rs4950315      | CHD1L     | 1 | 145202716 | 5 | 0.759204 |
| rs4950315      | CHD1L     | 1 | 145202716 | 1 | 5.852651 |
| rs17356233     | CHD1L     | 1 | 145207126 | 5 | 0.094295 |
| rs17356233     | CHD1L     | 1 | 145207126 | 1 | 5.930043 |
| rs10900376     | BCL9      | 1 | 145479986 | 5 | 1.225995 |
| rs2153463      | ACP6      | 1 | 145590934 | 7 | 0.174556 |
| rs2153463      | ACP6      | 1 | 145590934 | 8 | 4.657569 |
| rs2153463      | ACP6      | 1 | 145590934 | 6 | 5.42001  |
| rs2153463      | ACP6      | 1 | 145590934 | 3 | 0.540828 |
| rs563625       | FLJ39739  | 1 | 146317915 | 5 | 0.786154 |
| rs563625       | FLJ39739  | 1 | 146317915 | 4 | 0.363992 |
| rs563625       | FLJ39739  | 1 | 146317915 | 7 | 0.230404 |
| rs563625       | FLJ39739  | 1 | 146317915 | 6 | 0.783635 |
| rs563625       | FLJ39739  | 1 | 146317915 | 3 | 0.901611 |
| rs4649592      | LOC729135 | 1 | 147941416 | 5 | 1.356346 |
| rs1044808      | BOLA1     | 1 | 148138529 | 5 | 0.028183 |
| rs1044808      | BOLA1     | 1 | 148138529 | 4 | 0.332166 |
| rs7534365      | SV2A      | 1 | 148142748 | 5 | 0.733528 |
| rs12131104     | SV2A      | 1 | 148155963 | 5 | 2.873734 |
| SNP1-148172791 | MTMR11    | 1 | 148172791 | 4 | 0.413444 |
| SNP1-148172791 | MTMR11    | 1 | 148172791 | 5 | 0.726677 |
| rs11205303     | MTMR11    | 1 | 148173037 | 2 | 2.354947 |
| rs11205303     | MTMR11    | 1 | 148173037 | 5 | 0.525026 |
| rs11205303     | MTMR11    | 1 | 148173037 | 7 | 0.848441 |
| rs1868992      | MTMR11    | 1 | 148174732 | 5 | 0.801227 |
| rs2147324      | C1orf51   | 1 | 148522211 | 7 | 1.011036 |
| rs2147324      | C1orf51   | 1 | 148522211 | 6 | 0.779526 |
| SNP1-148547174 | MRPS21    | 1 | 148547174 | 7 | 2.166441 |
| rs8006         | MRPS21    | 1 | 148547425 | 5 | 0.180084 |
| rs8006         | MRPS21    | 1 | 148547425 | 4 | 1.260679 |
| rs8006         | MRPS21    | 1 | 148547425 | 6 | 3.568625 |
| rs8006         | MRPS21    | 1 | 148547425 | 7 | 0.342625 |
| SNP1-148696568 | KIAA0460  | 1 | 148696568 | 5 | 1.072601 |
| SNP1-148749979 | ECM1      | 1 | 148749979 | 3 | 0.54904  |
| SNP1-148749979 | ECM1      | 1 | 148749979 | 6 | 5.070508 |
| SNP1-148792668 | ADAMTSL4  | 1 | 148792668 | 6 | 6.406791 |
| SNP1-148792668 | ADAMTSL4  | 1 | 148792668 | 4 | 5.871452 |
| SNP1-148792668 | ADAMTSL4  | 1 | 148792668 | 3 | 0.301132 |

|                |          |   |           |   |          |
|----------------|----------|---|-----------|---|----------|
| SNP1-148792668 | ADAMTSL4 | 1 | 148792668 | 7 | 0.361317 |
| rs7517         | ENSA     | 1 | 148863035 | 3 | 0.673877 |
| rs41271951     | CTSS     | 1 | 149003844 | 5 | 2.709787 |
| rs7532008      | ANXA9    | 1 | 149226974 | 4 | 0.6375   |
| rs7532008      | ANXA9    | 1 | 149226974 | 3 | 0.453961 |
| SNP1-149241732 | FAM63A   | 1 | 149241732 | 3 | 0.021678 |
| SNP1-149241732 | FAM63A   | 1 | 149241732 | 4 | 7.22042  |
| rs12068365     | BNIP1    | 1 | 149282492 | 2 | 4.229685 |
| rs12068365     | BNIP1    | 1 | 149282492 | 5 | 0.169641 |
| rs6587553      | BNIP1    | 1 | 149285804 | 3 | 0.576862 |
| rs6587553      | BNIP1    | 1 | 149285804 | 1 | 5.230927 |
| rs6587553      | BNIP1    | 1 | 149285804 | 8 | 0.77257  |
| rs4970998      | MGC29891 | 1 | 149357805 | 8 | 0.152943 |
| rs4970998      | MGC29891 | 1 | 149357805 | 3 | 0.44506  |
| rs4970998      | MGC29891 | 1 | 149357805 | 1 | 3.952494 |
| rs4971005      | SEMA6C   | 1 | 149371222 | 3 | 0.69551  |
| rs4971005      | SEMA6C   | 1 | 149371222 | 8 | 3.085917 |
| rs4971005      | SEMA6C   | 1 | 149371222 | 1 | 5.127352 |
| rs10788800     | SEMA6C   | 1 | 149371574 | 3 | 0.423295 |
| rs10788800     | SEMA6C   | 1 | 149371574 | 1 | 0.449931 |
| rs4971007      | SEMA6C   | 1 | 149374761 | 8 | 0.777477 |
| rs4971007      | SEMA6C   | 1 | 149374761 | 1 | 5.482027 |
| rs4971007      | SEMA6C   | 1 | 149374761 | 3 | 1.289665 |
| rs10749661     | PSMD4    | 1 | 149505675 | 2 | 3.058542 |
| rs10749661     | PSMD4    | 1 | 149505675 | 8 | 1.314469 |
| rs10749661     | PSMD4    | 1 | 149505675 | 3 | 0.185279 |
| rs10749661     | PSMD4    | 1 | 149505675 | 7 | 0.394105 |
| rs1056847      | PI4KB    | 1 | 149554796 | 7 | 5.267722 |
| rs1056847      | PI4KB    | 1 | 149554796 | 3 | 0.142866 |
| rs2296840      | PSMB4    | 1 | 149638671 | 4 | 0.364174 |
| rs12125310     | POGZ     | 1 | 149698256 | 3 | 0.427297 |
| rs12125310     | POGZ     | 1 | 149698256 | 5 | 0.395421 |
| rs12125310     | POGZ     | 1 | 149698256 | 2 | 4.194553 |
| rs12038198     | CGN      | 1 | 149763826 | 2 | 4.531277 |
| rs3828054      | TUFT1    | 1 | 149779519 | 7 | 1.200846 |
| rs12749        | TUFT1    | 1 | 149822365 | 1 | 6.154799 |
| rs1048694      | SNX27    | 1 | 149936621 | 2 | 1.35099  |
| rs1048694      | SNX27    | 1 | 149936621 | 1 | 0.169826 |
| rs1048694      | SNX27    | 1 | 149936621 | 3 | 0.20046  |
| rs3790508      | TNRC4    | 1 | 149942110 | 7 | 0.601572 |
| rs12409493     | LINGO4   | 1 | 150039791 | 3 | 0.642467 |
| rs2932586      | KRT8P28  | 1 | 150189432 | 4 | 0.114961 |
| rs2932586      | KRT8P28  | 1 | 150189432 | 6 | 1.787791 |
| rs1496045      | HRNR     | 1 | 150451328 | 6 | 0.51959  |
| rs1496045      | HRNR     | 1 | 150451328 | 1 | 3.178885 |
| rs4845423      | HRNR     | 1 | 150451574 | 1 | 3.636425 |
| rs6587651      | HRNR     | 1 | 150459745 | 1 | 4.941292 |

|                |         |   |           |   |          |
|----------------|---------|---|-----------|---|----------|
| rs6587651      | HRNR    | 1 | 150459745 | 6 | 0.034261 |
| rs12405278     | FLG     | 1 | 150548891 | 6 | 0.737196 |
| rs12405278     | FLG     | 1 | 150548891 | 1 | 2.041694 |
| rs2065954      | FLG2    | 1 | 150587968 | 1 | 2.648454 |
| rs2282302      | FLG2    | 1 | 150595993 | 1 | 1.947453 |
| rs2282303      | FLG2    | 1 | 150596059 | 1 | 3.376245 |
| rs3818831      | FLG2    | 1 | 150597864 | 1 | 1.711075 |
| rs10888486     | CRNN    | 1 | 150648686 | 1 | 1.073428 |
| rs1053588      | CRCT1   | 1 | 150754687 | 7 | 1.275216 |
| SNP1-150915275 | LCE2C   | 1 | 150915275 | 1 | 1.865088 |
| SNP1-150915275 | LCE2C   | 1 | 150915275 | 6 | 0.664887 |
| SNP1-150915275 | LCE2C   | 1 | 150915275 | 2 | 1.362272 |
| SNP1-150915275 | LCE2C   | 1 | 150915275 | 5 | 1.151778 |
| SNP1-150915275 | LCE2C   | 1 | 150915275 | 7 | 0.805211 |
| SNP1-150926429 | LCE2B   | 1 | 150926429 | 5 | 1.665543 |
| rs41308367     | LCE2B   | 1 | 150926472 | 5 | 1.683917 |
| rs4845480      | KPRP    | 1 | 150999060 | 8 | 2.27248  |
| rs4845480      | KPRP    | 1 | 150999060 | 7 | 1.873733 |
| rs16834461     | KPRP    | 1 | 150999191 | 7 | 1.520039 |
| rs4329520      | KPRP    | 1 | 150999925 | 7 | 1.567607 |
| rs4329520      | KPRP    | 1 | 150999925 | 5 | 0.397001 |
| rs4329520      | KPRP    | 1 | 150999925 | 1 | 0.285191 |
| rs4329520      | KPRP    | 1 | 150999925 | 8 | 1.283472 |
| rs2297487      | KPRP    | 1 | 151001014 | 7 | 2.409266 |
| rs1048534      | LCE1C   | 1 | 151044198 | 1 | 2.111752 |
| rs1048534      | LCE1C   | 1 | 151044198 | 7 | 1.439214 |
| rs3170863      | SPRR4   | 1 | 151211218 | 7 | 0.812436 |
| rs6671524      | SPRR3   | 1 | 151240871 | 3 | 0.161236 |
| rs3181787      | SPRR1B  | 1 | 151271433 | 2 | 0.11492  |
| rs3181787      | SPRR1B  | 1 | 151271433 | 1 | 1.430324 |
| rs3181787      | SPRR1B  | 1 | 151271433 | 3 | 0.107894 |
| rs3181787      | SPRR1B  | 1 | 151271433 | 8 | 0.513601 |
| rs3181787      | SPRR1B  | 1 | 151271433 | 4 | 0.189082 |
| rs1048296      | SPRR2D  | 1 | 151278864 | 1 | 1.031733 |
| rs1048296      | SPRR2D  | 1 | 151278864 | 8 | 0.890225 |
| rs1048296      | SPRR2D  | 1 | 151278864 | 3 | 1.489785 |
| rs509194       | SPRR2G  | 1 | 151388795 | 8 | 4.479249 |
| rs843971       | PGLYRP3 | 1 | 151544047 | 6 | 1.962706 |
| rs843971       | PGLYRP3 | 1 | 151544047 | 5 | 0.056266 |
| rs843971       | PGLYRP3 | 1 | 151544047 | 7 | 1.805915 |
| rs843971       | PGLYRP3 | 1 | 151544047 | 1 | 5.653313 |
| rs2570440      | PGLYRP4 | 1 | 151569451 | 7 | 2.187348 |
| rs10888551     | PGLYRP4 | 1 | 151569511 | 1 | 0.906617 |
| rs3006448      | PGLYRP4 | 1 | 151580777 | 7 | 3.21326  |
| rs3014863      | PGLYRP4 | 1 | 151582203 | 7 | 0.8296   |
| rs3818632      | S100A13 | 1 | 151871143 | 6 | 1.660625 |
| rs3818632      | S100A13 | 1 | 151871143 | 8 | 3.972158 |

|                |         |   |           |   |          |
|----------------|---------|---|-----------|---|----------|
| rs3818632      | S100A13 | 1 | 151871143 | 3 | 1.054189 |
| rs3818632      | S100A13 | 1 | 151871143 | 7 | 1.142844 |
| rs3818632      | S100A13 | 1 | 151871143 | 4 | 1.925241 |
| GA019434       | NPR1    | 1 | 151928964 | 1 | 4.172049 |
| GA019434       | NPR1    | 1 | 151928964 | 3 | 1.113023 |
| rs11264680     | CRTC2   | 1 | 152192702 | 8 | 3.786693 |
| rs11264680     | CRTC2   | 1 | 152192702 | 6 | 0.747867 |
| rs11264680     | CRTC2   | 1 | 152192702 | 1 | 1.076805 |
| rs11264680     | CRTC2   | 1 | 152192702 | 2 | 1.142326 |
| rs11264680     | CRTC2   | 1 | 152192702 | 7 | 3.101328 |
| rs11264875     | NUP210L | 1 | 152261271 | 7 | 1.081822 |
| rs11264875     | NUP210L | 1 | 152261271 | 6 | 0.316571 |
| rs11264875     | NUP210L | 1 | 152261271 | 1 | 1.675789 |
| rs7654         | TPM3    | 1 | 152396254 | 8 | 5.368605 |
| rs1194587      | ATP8B2  | 1 | 152583777 | 5 | 1.319577 |
| rs1194587      | ATP8B2  | 1 | 152583777 | 1 | 3.379526 |
| rs1194587      | ATP8B2  | 1 | 152583777 | 3 | 1.348153 |
| rs1194587      | ATP8B2  | 1 | 152583777 | 6 | 1.251071 |
| rs1194587      | ATP8B2  | 1 | 152583777 | 7 | 0.625739 |
| rs2297607      | ATP8B2  | 1 | 152587566 | 8 | 0.09924  |
| rs2297607      | ATP8B2  | 1 | 152587566 | 3 | 0.509497 |
| rs2297607      | ATP8B2  | 1 | 152587566 | 5 | 0.771063 |
| rs8192282      | IL6R    | 1 | 152668303 | 7 | 0.803388 |
| rs2229238      | IL6R    | 1 | 152704520 | 7 | 0.393201 |
| rs12568083     | SHE     | 1 | 152722573 | 6 | 1.216002 |
| rs4845635      | SHE     | 1 | 152740755 | 6 | 2.815898 |
| rs4845635      | SHE     | 1 | 152740755 | 7 | 2.387409 |
| rs12753680     | TDRD10  | 1 | 152741524 | 6 | 1.026462 |
| rs12750774     | TDRD10  | 1 | 152783101 | 1 | 2.312573 |
| rs12750774     | TDRD10  | 1 | 152783101 | 5 | 0.894201 |
| rs2072660      | CHRNA2  | 1 | 152815345 | 1 | 0.301104 |
| rs2072660      | CHRNA2  | 1 | 152815345 | 2 | 0.746818 |
| rs1131820      | KCNN3   | 1 | 153011476 | 6 | 1.019098 |
| GA001167       | PMVK    | 1 | 153175793 | 2 | 4.309876 |
| GA001167       | PMVK    | 1 | 153175793 | 1 | 0.681524 |
| GA001167       | PMVK    | 1 | 153175793 | 8 | 7.118739 |
| GA001167       | PMVK    | 1 | 153175793 | 6 | 5.83227  |
| rs10908453     | DCST2   | 1 | 153272715 | 5 | 0.2578   |
| rs10908453     | DCST2   | 1 | 153272715 | 3 | 0.047853 |
| rs6680600      | DCST1   | 1 | 153273623 | 5 | 0.183612 |
| rs6680600      | DCST1   | 1 | 153273623 | 3 | 0.359838 |
| rs6680600      | DCST1   | 1 | 153273623 | 4 | 0.365313 |
| SNP1-153300542 | ADAM15  | 1 | 153300542 | 6 | 0.458549 |
| SNP1-153300542 | ADAM15  | 1 | 153300542 | 5 | 1.456747 |
| SNP1-153300542 | ADAM15  | 1 | 153300542 | 8 | 1.337548 |
| rs17723260     | EFNA3   | 1 | 153325287 | 5 | 0.512172 |
| rs17723260     | EFNA3   | 1 | 153325287 | 7 | 0.81395  |



|            |         |   |           |   |          |
|------------|---------|---|-----------|---|----------|
| rs17723260 | EFNA3   | 1 | 153325287 | 1 | 2.67432  |
| rs17723260 | EFNA3   | 1 | 153325287 | 6 | 0.783001 |
| rs4745     | EFNA1   | 1 | 153372851 | 4 | 5.169291 |
| rs4745     | EFNA1   | 1 | 153372851 | 5 | 0.306804 |
| rs4745     | EFNA1   | 1 | 153372851 | 6 | 2.655385 |
| rs4745     | EFNA1   | 1 | 153372851 | 2 | 5.852759 |
| rs3814316  | TRIM46  | 1 | 153416342 | 5 | 4.299625 |
| rs3814316  | TRIM46  | 1 | 153416342 | 8 | 0.36268  |
| rs3814316  | TRIM46  | 1 | 153416342 | 4 | 0.327465 |
| rs1611772  | MUC1    | 1 | 153425229 | 3 | 0.572023 |
| rs4072037  | MUC1    | 1 | 153428691 | 4 | 2.965868 |
| rs4072037  | MUC1    | 1 | 153428691 | 2 | 6.098889 |
| rs4072037  | MUC1    | 1 | 153428691 | 8 | 3.814741 |
| rs4072037  | MUC1    | 1 | 153428691 | 7 | 3.696761 |
| VG01S1161  | GBA     | 1 | 153472841 | 3 | 2.853908 |
| rs12034326 | GBA     | 1 | 153481097 | 5 | 0.041387 |
| rs12034326 | GBA     | 1 | 153481097 | 6 | 0.065627 |
| rs12034326 | GBA     | 1 | 153481097 | 4 | 0.753244 |
| rs3180018  | SCAMP3  | 1 | 153496755 | 5 | 0.38194  |
| rs3180018  | SCAMP3  | 1 | 153496755 | 4 | 0.179056 |
| rs1046188  | SCAMP3  | 1 | 153498698 | 4 | 5.234737 |
| rs1046188  | SCAMP3  | 1 | 153498698 | 5 | 5.913235 |
| rs932972   | PKLR    | 1 | 153526720 | 5 | 1.176796 |
| rs932972   | PKLR    | 1 | 153526720 | 6 | 0.858445 |
| rs932972   | PKLR    | 1 | 153526720 | 4 | 1.23542  |
| rs932972   | PKLR    | 1 | 153526720 | 8 | 0.354026 |
| rs1052177  | PKLR    | 1 | 153526974 | 5 | 0.873039 |
| rs1052177  | PKLR    | 1 | 153526974 | 4 | 0.742034 |
| rs1052176  | PKLR    | 1 | 153527007 | 5 | 2.895173 |
| rs1052176  | PKLR    | 1 | 153527007 | 4 | 3.274442 |
| rs1052176  | PKLR    | 1 | 153527007 | 6 | 3.312998 |
| rs1052176  | PKLR    | 1 | 153527007 | 8 | 3.231238 |
| rs1052176  | PKLR    | 1 | 153527007 | 2 | 4.213713 |
| rs41264231 | ASH1L   | 1 | 153584306 | 7 | 0.053448 |
| rs7539     | YY1AP1  | 1 | 153896107 | 1 | 6.479892 |
| rs3820594  | SYT11   | 1 | 154096135 | 5 | 0.542932 |
| rs928596   | ARHGEF2 | 1 | 154214499 | 6 | 0.330681 |
| rs928596   | ARHGEF2 | 1 | 154214499 | 4 | 0.222291 |
| rs928596   | ARHGEF2 | 1 | 154214499 | 5 | 0.582378 |
| rs1889533  | ARHGEF2 | 1 | 154214554 | 6 | 3.771699 |
| rs1889533  | ARHGEF2 | 1 | 154214554 | 4 | 1.358244 |
| rs1889533  | ARHGEF2 | 1 | 154214554 | 5 | 1.145713 |
| rs2297792  | UBQLN4  | 1 | 154278068 | 4 | 1.715981 |
| rs2297792  | UBQLN4  | 1 | 154278068 | 5 | 0.187356 |
| rs11264432 | MEX3A   | 1 | 154309539 | 1 | 0.325066 |
| rs11264432 | MEX3A   | 1 | 154309539 | 4 | 0.473118 |
| rs11264432 | MEX3A   | 1 | 154309539 | 7 | 0.171131 |

|                |         |   |           |   |          |
|----------------|---------|---|-----------|---|----------|
| rs11264432     | MEX3A   | 1 | 154309539 | 6 | 4.561884 |
| rs3814314      | MEX3A   | 1 | 154311807 | 7 | 0.441464 |
| rs3814314      | MEX3A   | 1 | 154311807 | 5 | 0.313174 |
| rs2075165      | PAQR6   | 1 | 154482523 | 5 | 0.54889  |
| rs2075165      | PAQR6   | 1 | 154482523 | 1 | 1.364008 |
| rs2273833      | SMG5    | 1 | 154499813 | 7 | 0.211596 |
| rs2273833      | SMG5    | 1 | 154499813 | 4 | 5.991758 |
| rs2273833      | SMG5    | 1 | 154499813 | 6 | 0.657498 |
| rs1570805      | C1orf85 | 1 | 154531272 | 1 | 3.147554 |
| rs2245623      | RHBG    | 1 | 154613755 | 3 | 3.41898  |
| rs1925950      | MEF2D   | 1 | 154717364 | 3 | 0.699339 |
| rs1925950      | MEF2D   | 1 | 154717364 | 8 | 3.244875 |
| rs11264498     | IQGAP3  | 1 | 154793011 | 3 | 0.156754 |
| rs11264498     | IQGAP3  | 1 | 154793011 | 6 | 0.00838  |
| rs11264498     | IQGAP3  | 1 | 154793011 | 2 | 4.358101 |
| rs1056695      | BCAN    | 1 | 154888876 | 1 | 0.063252 |
| rs11582300     | NES     | 1 | 154906377 | 3 | 0.52654  |
| rs11582300     | NES     | 1 | 154906377 | 7 | 1.09419  |
| rs3748571      | NES     | 1 | 154906932 | 4 | 0.125889 |
| rs3828043      | NES     | 1 | 154907127 | 8 | 1.670361 |
| rs3828043      | NES     | 1 | 154907127 | 2 | 1.517966 |
| rs3828043      | NES     | 1 | 154907127 | 4 | 0.933125 |
| rs951781       | NES     | 1 | 154908161 | 7 | 4.277486 |
| rs951781       | NES     | 1 | 154908161 | 3 | 0.15064  |
| rs11579761     | ISG20L2 | 1 | 154959642 | 6 | 0.206476 |
| rs926103       | SH2D2A  | 1 | 155051606 | 8 | 0.871745 |
| rs926103       | SH2D2A  | 1 | 155051606 | 3 | 0.095674 |
| rs926103       | SH2D2A  | 1 | 155051606 | 6 | 0.07289  |
| rs926103       | SH2D2A  | 1 | 155051606 | 7 | 0.520919 |
| SNP1-155080651 | INSRR   | 1 | 155080651 | 1 | 1.715534 |
| SNP1-155080651 | INSRR   | 1 | 155080651 | 3 | 0.577945 |
| rs6337         | NTRK1   | 1 | 155115619 | 2 | 1.396891 |
| rs6337         | NTRK1   | 1 | 155115619 | 6 | 1.422735 |
| rs6337         | NTRK1   | 1 | 155115619 | 4 | 0.201303 |
| rs41299597     | PEAR1   | 1 | 155149381 | 1 | 1.745572 |
| rs822441       | PEAR1   | 1 | 155149620 | 6 | 1.518532 |
| rs822441       | PEAR1   | 1 | 155149620 | 1 | 0.512115 |
| rs11264581     | PEAR1   | 1 | 155150117 | 6 | 1.801813 |
| rs12137505     | PEAR1   | 1 | 155150170 | 6 | 1.162544 |
| rs12137505     | PEAR1   | 1 | 155150170 | 7 | 0.412999 |
| rs12137505     | PEAR1   | 1 | 155150170 | 1 | 1.192102 |
| rs12137505     | PEAR1   | 1 | 155150170 | 3 | 0.761964 |
| rs4661012      | PEAR1   | 1 | 155152115 | 3 | 1.645046 |
| rs4661012      | PEAR1   | 1 | 155152115 | 7 | 0.326486 |
| SNP1-155152391 | PEAR1   | 1 | 155152391 | 2 | 1.343325 |
| SNP1-155152391 | PEAR1   | 1 | 155152391 | 8 | 7.315206 |
| rs12119908     | C1orf92 | 1 | 155168846 | 8 | 0.087036 |

|                |          |   |           |   |          |
|----------------|----------|---|-----------|---|----------|
| rs822430       | C1orf92  | 1 | 155168883 | 7 | 1.21861  |
| rs822430       | C1orf92  | 1 | 155168883 | 8 | 0.173986 |
| rs822430       | C1orf92  | 1 | 155168883 | 3 | 1.358448 |
| rs3187878      | ARHGEF11 | 1 | 155171268 | 8 | 0.403761 |
| SNP1-155173739 | ARHGEF11 | 1 | 155173739 | 7 | 0.822204 |
| SNP1-155173739 | ARHGEF11 | 1 | 155173739 | 3 | 0.615615 |
| rs3845586      | NULL     | 1 | 155751077 | 1 | 1.694735 |
| rs6427384      | FCRL5    | 1 | 155775506 | 3 | 0.470068 |
| rs12036228     | FCRL5    | 1 | 155780715 | 7 | 1.924124 |
| rs12036228     | FCRL5    | 1 | 155780715 | 5 | 2.455807 |
| rs12036228     | FCRL5    | 1 | 155780715 | 1 | 2.766108 |
| rs849827       | FCRL4    | 1 | 155811855 | 7 | 2.245318 |
| rs849827       | FCRL4    | 1 | 155811855 | 1 | 2.902624 |
| rs849827       | FCRL4    | 1 | 155811855 | 2 | 1.364208 |
| rs6691569      | FCRL3    | 1 | 155914722 | 7 | 1.1627   |
| rs6691569      | FCRL3    | 1 | 155914722 | 3 | 1.471985 |
| rs11805944     | FCRL3    | 1 | 155914779 | 8 | 2.418705 |
| rs2282283      | FCRL3    | 1 | 155914995 | 1 | 2.812054 |
| rs12129399     | FCRL2    | 1 | 155982430 | 1 | 5.191656 |
| rs2873413      | FCRL2    | 1 | 156004128 | 1 | 0.155465 |
| rs2873413      | FCRL2    | 1 | 156004128 | 4 | 0.219548 |
| rs2873413      | FCRL2    | 1 | 156004128 | 3 | 0.072596 |
| rs1016849      | FCRL1    | 1 | 156031588 | 3 | 2.977266 |
| rs36008419     | KIRREL   | 1 | 156324257 | 4 | 0.011289 |
| rs36008419     | KIRREL   | 1 | 156324257 | 1 | 5.530208 |
| rs36008419     | KIRREL   | 1 | 156324257 | 6 | 0.005561 |
| rs16840096     | CD1B     | 1 | 156564584 | 4 | 0.15836  |
| rs6679056      | OR10R2   | 1 | 156716938 | 6 | 4.255211 |
| rs6679056      | OR10R2   | 1 | 156716938 | 7 | 4.393605 |
| rs6679056      | OR10R2   | 1 | 156716938 | 1 | 3.63137  |
| rs1418843      | OR10R2   | 1 | 156717006 | 7 | 2.774882 |
| rs857825       | OR6N1    | 1 | 157002315 | 4 | 2.114147 |
| rs857825       | OR6N1    | 1 | 157002315 | 7 | 4.041589 |
| rs857825       | OR6N1    | 1 | 157002315 | 5 | 2.213307 |
| rs857825       | OR6N1    | 1 | 157002315 | 3 | 2.043073 |
| rs857825       | OR6N1    | 1 | 157002315 | 1 | 3.503987 |
| rs857826       | OR6N1    | 1 | 157002364 | 7 | 3.77756  |
| rs857826       | OR6N1    | 1 | 157002364 | 4 | 4.531797 |
| rs857826       | OR6N1    | 1 | 157002364 | 3 | 4.150402 |
| rs857826       | OR6N1    | 1 | 157002364 | 1 | 3.460541 |
| rs1864346      | OR6N1    | 1 | 157003069 | 5 | 0.36258  |
| rs1864346      | OR6N1    | 1 | 157003069 | 7 | 1.596659 |
| rs1864346      | OR6N1    | 1 | 157003069 | 1 | 0.083544 |
| rs1864346      | OR6N1    | 1 | 157003069 | 3 | 0.082261 |
| rs2276404      | IFI16    | 1 | 157246574 | 2 | 2.143689 |
| rs2276404      | IFI16    | 1 | 157246574 | 7 | 0.203437 |
| rs866484       | IFI16    | 1 | 157253101 | 8 | 0.207573 |

|                |        |   |           |   |          |
|----------------|--------|---|-----------|---|----------|
| rs866484       | IFI16  | 1 | 157253101 | 3 | 0.502198 |
| rs866484       | IFI16  | 1 | 157253101 | 2 | 2.101428 |
| rs3737523      | IFI16  | 1 | 157288351 | 6 | 5.164391 |
| rs862999       | CADM3  | 1 | 157436265 | 7 | 2.226276 |
| rs862999       | CADM3  | 1 | 157436265 | 4 | 0.541431 |
| rs862999       | CADM3  | 1 | 157436265 | 3 | 0.875864 |
| rs13962        | DARC   | 1 | 157442151 | 5 | 3.110081 |
| rs13962        | DARC   | 1 | 157442151 | 2 | 1.517465 |
| rs13962        | DARC   | 1 | 157442151 | 4 | 1.929071 |
| rs13962        | DARC   | 1 | 157442151 | 3 | 1.288363 |
| rs1205         | CRP    | 1 | 157948857 | 5 | 0.251342 |
| rs1205         | CRP    | 1 | 157948857 | 2 | 1.921305 |
| SNP1-158045534 | FCRL6  | 1 | 158045534 | 1 | 1.94077  |
| SNP1-158045534 | FCRL6  | 1 | 158045534 | 5 | 0.964555 |
| SNP1-158051994 | FCRL6  | 1 | 158051994 | 1 | 2.594234 |
| SNP1-158066534 | SLAMF8 | 1 | 158066534 | 1 | 3.177973 |
| SNP1-158066534 | SLAMF8 | 1 | 158066534 | 7 | 0.524483 |
| rs2494507      | VSIG8  | 1 | 158099049 | 8 | 1.491436 |
| rs7550537      | CCDC19 | 1 | 158117025 | 7 | 5.357912 |
| rs16842789     | CCDC19 | 1 | 158120875 | 2 | 1.327544 |
| rs12409352     | PIGM   | 1 | 158267059 | 2 | 6.433836 |
| rs1053074      | KCNJ10 | 1 | 158275745 | 3 | 0.794949 |
| rs1053074      | KCNJ10 | 1 | 158275745 | 5 | 0.539986 |
| rs1053074      | KCNJ10 | 1 | 158275745 | 7 | 0.008391 |
| SNP1-158324146 | KCNJ9  | 1 | 158324146 | 5 | 0.736028 |
| SNP1-158324146 | KCNJ9  | 1 | 158324146 | 2 | 0.85998  |
| SNP1-158324146 | KCNJ9  | 1 | 158324146 | 1 | 0.568443 |
| GA001274       | KCNJ9  | 1 | 158324588 | 1 | 1.146538 |
| GA001274       | KCNJ9  | 1 | 158324588 | 3 | 0.537638 |
| GA001274       | KCNJ9  | 1 | 158324588 | 5 | 0.964041 |
| rs2753268      | KCNJ9  | 1 | 158324876 | 7 | 0.665982 |
| rs2753268      | KCNJ9  | 1 | 158324876 | 1 | 4.165942 |
| rs2753268      | KCNJ9  | 1 | 158324876 | 5 | 0.139735 |
| rs6427504      | ATP1A4 | 1 | 158391499 | 8 | 1.796467 |
| rs11265338     | ATP1A4 | 1 | 158400829 | 1 | 1.487648 |
| rs11265338     | ATP1A4 | 1 | 158400829 | 3 | 1.63181  |
| rs10594        | PEX19  | 1 | 158513809 | 3 | 0.910641 |
| rs7521304      | NHLH1  | 1 | 158608639 | 6 | 0.039703 |
| rs7521304      | NHLH1  | 1 | 158608639 | 3 | 0.776714 |
| rs3766388      | CD84   | 1 | 158784103 | 7 | 0.79775  |
| rs1061217      | SLAMF1 | 1 | 158846639 | 5 | 3.464283 |
| rs1061217      | SLAMF1 | 1 | 158846639 | 3 | 2.089279 |
| rs1061217      | SLAMF1 | 1 | 158846639 | 8 | 3.819994 |
| rs1061217      | SLAMF1 | 1 | 158846639 | 1 | 5.19638  |
| rs1061217      | SLAMF1 | 1 | 158846639 | 7 | 2.731975 |
| rs1061217      | SLAMF1 | 1 | 158846639 | 4 | 3.19056  |
| rs1126644      | CD48   | 1 | 158915173 | 1 | 2.541125 |

|                |          |   |           |   |          |
|----------------|----------|---|-----------|---|----------|
| rs1126644      | CD48     | 1 | 158915173 | 5 | 1.742855 |
| rs1980606      | CD48     | 1 | 158921410 | 1 | 1.16972  |
| rs1980606      | CD48     | 1 | 158921410 | 3 | 0.401803 |
| rs11265473     | SLAMF7   | 1 | 158990072 | 1 | 2.996341 |
| rs518721       | SLAMF7   | 1 | 158990141 | 2 | 1.4032   |
| rs518721       | SLAMF7   | 1 | 158990141 | 1 | 0.778081 |
| rs509749       | LY9      | 1 | 159060184 | 6 | 0.735186 |
| SNP1-159187038 | ITLN2    | 1 | 159187038 | 1 | 1.915421 |
| SNP1-159187038 | ITLN2    | 1 | 159187038 | 3 | 3.23751  |
| SNP1-159187038 | ITLN2    | 1 | 159187038 | 6 | 2.863929 |
| SNP1-159187038 | ITLN2    | 1 | 159187038 | 7 | 1.832344 |
| SNP1-159187038 | ITLN2    | 1 | 159187038 | 5 | 1.558245 |
| SNP1-159187038 | ITLN2    | 1 | 159187038 | 4 | 2.020658 |
| SNP1-159187038 | ITLN2    | 1 | 159187038 | 2 | 1.411713 |
| rs1062826      | F11R     | 1 | 159234629 | 3 | 0.051007 |
| rs1062826      | F11R     | 1 | 159234629 | 5 | 0.264366 |
| rs1062826      | F11R     | 1 | 159234629 | 8 | 0.173376 |
| rs1062826      | F11R     | 1 | 159234629 | 4 | 0.465369 |
| GA019599       | F11R     | 1 | 159257530 | 5 | 0.152491 |
| GA019599       | F11R     | 1 | 159257530 | 8 | 5.502296 |
| GA019599       | F11R     | 1 | 159257530 | 4 | 0.598624 |
| GA019599       | F11R     | 1 | 159257530 | 3 | 0.644303 |
| rs3737787      | USF1     | 1 | 159276147 | 2 | 4.545299 |
| rs3737787      | USF1     | 1 | 159276147 | 3 | 0.726507 |
| rs3737787      | USF1     | 1 | 159276147 | 8 | 0.636367 |
| rs3737787      | USF1     | 1 | 159276147 | 5 | 0.340154 |
| rs3737787      | USF1     | 1 | 159276147 | 4 | 0.17402  |
| rs2774279      | ARHGAP30 | 1 | 159284180 | 5 | 0.001795 |
| rs2774279      | ARHGAP30 | 1 | 159284180 | 6 | 0.055721 |
| rs2301286      | PPOX     | 1 | 159402848 | 6 | 1.635977 |
| rs3813620      | B4GALT3  | 1 | 159411629 | 1 | 4.76046  |
| rs3813620      | B4GALT3  | 1 | 159411629 | 4 | 0.104775 |
| rs4233367      | ADAMTS4  | 1 | 159429661 | 3 | 0.584901 |
| rs4233367      | ADAMTS4  | 1 | 159429661 | 5 | 0.118449 |
| GA001306       | ADAMTS4  | 1 | 159434628 | 3 | 0.327976 |
| rs3813623      | NDUFS2   | 1 | 159435789 | 1 | 1.466851 |
| rs3813623      | NDUFS2   | 1 | 159435789 | 2 | 0.995339 |
| rs3813623      | NDUFS2   | 1 | 159435789 | 5 | 0.313285 |
| rs1136207      | NDUFS2   | 1 | 159450140 | 5 | 3.881138 |
| rs1136207      | NDUFS2   | 1 | 159450140 | 1 | 0.695654 |
| rs1136207      | NDUFS2   | 1 | 159450140 | 2 | 0.226851 |
| rs1136207      | NDUFS2   | 1 | 159450140 | 6 | 0.428351 |
| rs3813628      | TOMM40L  | 1 | 159462790 | 5 | 0.205259 |
| rs3813628      | TOMM40L  | 1 | 159462790 | 6 | 1.417828 |
| rs3813628      | TOMM40L  | 1 | 159462790 | 1 | 1.832831 |
| rs2307424      | NR1I3    | 1 | 159469229 | 5 | 0.720735 |
| rs2307424      | NR1I3    | 1 | 159469229 | 6 | 0.115288 |

|                |          |   |           |   |          |
|----------------|----------|---|-----------|---|----------|
| rs2307424      | NR1I3    | 1 | 159469229 | 1 | 1.974622 |
| rs4477295      | PCP4L1   | 1 | 159520904 | 3 | 1.200048 |
| rs8266         | SDHC     | 1 | 159599232 | 7 | 1.281602 |
| rs12239492     | SDHC     | 1 | 159600899 | 7 | 0.520654 |
| rs16832869     | C1orf192 | 1 | 159601359 | 7 | 1.70487  |
| rs1801274      | FCGR2A   | 1 | 159746369 | 3 | 0.263176 |
| rs1079109      | HSPA6    | 1 | 159761664 | 7 | 0.453157 |
| rs1079109      | HSPA6    | 1 | 159761664 | 2 | 2.970204 |
| rs753856       | HSPA6    | 1 | 159762758 | 2 | 4.296457 |
| rs753856       | HSPA6    | 1 | 159762758 | 7 | 0.868497 |
| rs844          | FCGR2B   | 1 | 159914157 | 1 | 3.255604 |
| rs844          | FCGR2B   | 1 | 159914157 | 7 | 2.955834 |
| rs844          | FCGR2B   | 1 | 159914157 | 2 | 4.302784 |
| rs4301614      | FCRLA    | 1 | 159948472 | 4 | 1.098516 |
| rs11746        | FCRLA    | 1 | 159949760 | 8 | 1.223699 |
| rs11746        | FCRLA    | 1 | 159949760 | 2 | 4.2014   |
| rs11746        | FCRLA    | 1 | 159949760 | 7 | 0.648841 |
| rs7520519      | FCRLB    | 1 | 159962263 | 2 | 4.212012 |
| rs7520519      | FCRLB    | 1 | 159962263 | 7 | 3.217548 |
| rs7520519      | FCRLB    | 1 | 159962263 | 4 | 0.787641 |
| rs7520519      | FCRLB    | 1 | 159962263 | 8 | 4.108713 |
| rs12022536     | OLFML2B  | 1 | 160242858 | 3 | 0.220816 |
| rs348624       | NOS1AP   | 1 | 160601880 | 8 | 1.344403 |
| rs348624       | NOS1AP   | 1 | 160601880 | 7 | 1.661545 |
| rs2282397      | C1orf111 | 1 | 160610726 | 1 | 1.989987 |
| rs2282397      | C1orf111 | 1 | 160610726 | 5 | 0.290763 |
| rs34001279     | SH2D1B   | 1 | 160633727 | 5 | 0.000768 |
| rs2298258      | DDR2     | 1 | 161003740 | 2 | 4.604177 |
| rs2298258      | DDR2     | 1 | 161003740 | 3 | 0.192941 |
| rs12134171     | C1orf110 | 1 | 161089164 | 5 | 0.29663  |
| SNP1-161092081 | C1orf110 | 1 | 161092081 | 5 | 0.673882 |
| SNP1-161092081 | C1orf110 | 1 | 161092081 | 3 | 0.816413 |
| rs10917682     | RGS5     | 1 | 161378828 | 1 | 2.890115 |
| rs1056515      | RGS5     | 1 | 161379884 | 1 | 4.26903  |
| rs1056515      | RGS5     | 1 | 161379884 | 4 | 0.165608 |
| rs1056515      | RGS5     | 1 | 161379884 | 6 | 0.579543 |
| rs2661280      | RGS5     | 1 | 161379999 | 7 | 1.354069 |
| rs2661280      | RGS5     | 1 | 161379999 | 8 | 0.583147 |
| rs2661280      | RGS5     | 1 | 161379999 | 3 | 0.362888 |
| rs1056514      | RGS5     | 1 | 161380190 | 8 | 1.313485 |
| rs1056514      | RGS5     | 1 | 161380190 | 3 | 1.287852 |
| rs1056514      | RGS5     | 1 | 161380190 | 7 | 1.234827 |
| rs3806368      | RGS5     | 1 | 161380502 | 3 | 0.765816 |
| rs1054943      | RGS5     | 1 | 161380720 | 3 | 0.181062 |
| rs3820487      | RGS5     | 1 | 161380982 | 6 | 1.933497 |
| rs3806366      | RGS5     | 1 | 161381945 | 4 | 1.542538 |
| rs3806366      | RGS5     | 1 | 161381945 | 3 | 0.212976 |

|            |           |   |           |   |          |
|------------|-----------|---|-----------|---|----------|
| rs3806365  | RGS5      | 1 | 161382055 | 6 | 1.106531 |
| rs3806365  | RGS5      | 1 | 161382055 | 4 | 1.01715  |
| rs3806365  | RGS5      | 1 | 161382055 | 3 | 0.446842 |
| rs1395960  | RGS5      | 1 | 161382146 | 3 | 5.04008  |
| rs1395960  | RGS5      | 1 | 161382146 | 4 | 2.571579 |
| rs1395960  | RGS5      | 1 | 161382146 | 6 | 0.200922 |
| rs1509022  | NUF2      | 1 | 161575843 | 1 | 0.276338 |
| rs1509022  | NUF2      | 1 | 161575843 | 2 | 2.427895 |
| rs17402900 | LMX1A     | 1 | 163438301 | 2 | 3.031007 |
| rs17402900 | LMX1A     | 1 | 163438301 | 7 | 2.639434 |
| rs16840972 | LMX1A     | 1 | 163438629 | 1 | 2.454268 |
| rs9970062  | LMX1A     | 1 | 163485303 | 5 | 0.021353 |
| rs2134095  | RXRG      | 1 | 163644176 | 1 | 0.748561 |
| rs113471   | RXRG      | 1 | 163664739 | 3 | 0.2318   |
| rs367199   | LRRC52    | 1 | 163799812 | 5 | 0.96918  |
| rs11585763 | LOC401975 | 1 | 164258785 | 3 | 0.2137   |
| rs6692476  | LOC401975 | 1 | 164258836 | 3 | 0.523792 |
| rs6692476  | LOC401975 | 1 | 164258836 | 4 | 0.269443 |
| rs12741275 | FMO9P     | 1 | 164860378 | 3 | 0.983735 |
| rs524612   | LOC646688 | 1 | 164983265 | 3 | 4.862392 |
| rs524612   | LOC646688 | 1 | 164983265 | 4 | 0.069038 |
| rs1815531  | LOC646688 | 1 | 164983830 | 8 | 0.066153 |
| rs1815531  | LOC646688 | 1 | 164983830 | 2 | 0.288868 |
| rs1815531  | LOC646688 | 1 | 164983830 | 3 | 0.587243 |
| rs1815531  | LOC646688 | 1 | 164983830 | 1 | 0.032797 |
| rs1815531  | LOC646688 | 1 | 164983830 | 6 | 0.016422 |
| rs12461    | GPA33     | 1 | 165289005 | 5 | 0.842624 |
| rs12461    | GPA33     | 1 | 165289005 | 4 | 2.029991 |
| rs3753914  | GPA33     | 1 | 165289325 | 3 | 0.156821 |
| rs3753914  | GPA33     | 1 | 165289325 | 7 | 0.487923 |
| rs3753914  | GPA33     | 1 | 165289325 | 1 | 0.078937 |
| rs12076250 | GPA33     | 1 | 165289544 | 1 | 0.375077 |
| rs12076250 | GPA33     | 1 | 165289544 | 7 | 0.144802 |
| rs12076250 | GPA33     | 1 | 165289544 | 2 | 0.453159 |
| rs12076250 | GPA33     | 1 | 165289544 | 4 | 1.987738 |
| rs2281962  | GPA33     | 1 | 165326384 | 3 | 0.513074 |
| rs2281962  | GPA33     | 1 | 165326384 | 5 | 1.453744 |
| rs267747   | DUSP27    | 1 | 165364569 | 3 | 0.354653 |
| rs1052231  | CD247     | 1 | 165666698 | 6 | 0.416994 |
| rs1052231  | CD247     | 1 | 165666698 | 1 | 2.302581 |
| rs1052230  | CD247     | 1 | 165666705 | 6 | 0.077645 |
| rs1052230  | CD247     | 1 | 165666705 | 1 | 5.695127 |
| rs3831958  | CD247     | 1 | 165666815 | 6 | 1.690362 |
| rs3831958  | CD247     | 1 | 165666815 | 1 | 3.414022 |
| rs12025624 | CREG1     | 1 | 165789653 | 3 | 0.842756 |
| rs2297777  | RCSD1     | 1 | 165941277 | 6 | 0.068556 |
| rs2297777  | RCSD1     | 1 | 165941277 | 8 | 1.320106 |

|                |           |   |           |   |          |
|----------------|-----------|---|-----------|---|----------|
| rs2297777      | RCSD1     | 1 | 165941277 | 4 | 1.815985 |
| rs2297777      | RCSD1     | 1 | 165941277 | 7 | 1.353067 |
| rs8623         | MPZL1     | 1 | 166026462 | 6 | 1.173371 |
| rs203795       | SAC       | 1 | 166084263 | 5 | 1.273895 |
| rs2071921      | SAC       | 1 | 166092109 | 5 | 0.061409 |
| rs1050037      | BRP44     | 1 | 166154040 | 7 | 0.502451 |
| rs203861       | BRP44     | 1 | 166160383 | 1 | 0.046795 |
| rs203861       | BRP44     | 1 | 166160383 | 5 | 0.34511  |
| rs203861       | BRP44     | 1 | 166160383 | 2 | 0.058801 |
| SNP1-166372120 | GPR161    | 1 | 166372120 | 7 | 1.195625 |
| rs3885717      | TBX19     | 1 | 166548885 | 7 | 4.225162 |
| rs3885717      | TBX19     | 1 | 166548885 | 4 | 0.759348 |
| rs3885717      | TBX19     | 1 | 166548885 | 8 | 0.068087 |
| rs3885717      | TBX19     | 1 | 166548885 | 1 | 3.411772 |
| rs3885717      | TBX19     | 1 | 166548885 | 3 | 0.158507 |
| rs1042882      | XCL1      | 1 | 166817159 | 8 | 2.845695 |
| rs1042882      | XCL1      | 1 | 166817159 | 4 | 1.690091 |
| rs16861320     | DPT       | 1 | 166931970 | 4 | 0.686021 |
| rs3795611      | LOC391132 | 1 | 167174523 | 5 | 0.736251 |
| rs2272801      | C1orf114  | 1 | 167633140 | 6 | 0.205917 |
| SNP1-167657581 | C1orf114  | 1 | 167657581 | 5 | 0.284121 |
| SNP1-167657581 | C1orf114  | 1 | 167657581 | 1 | 0.226187 |
| SNP1-167657581 | C1orf114  | 1 | 167657581 | 4 | 0.393542 |
| SNP1-167657581 | C1orf114  | 1 | 167657581 | 6 | 0.566298 |
| rs3820059      | C1orf114  | 1 | 167657778 | 1 | 0.740988 |
| rs3820059      | C1orf114  | 1 | 167657778 | 3 | 0.869832 |
| rs12091844     | SLC19A2   | 1 | 167699897 | 4 | 5.641291 |
| rs9332701      | F5        | 1 | 167751391 | 1 | 1.831967 |
| rs6030         | F5        | 1 | 167765599 | 6 | 2.399204 |
| rs6030         | F5        | 1 | 167765599 | 3 | 2.31765  |
| rs6032         | F5        | 1 | 167778179 | 6 | 0.468518 |
| rs6032         | F5        | 1 | 167778179 | 2 | 1.421118 |
| rs6032         | F5        | 1 | 167778179 | 1 | 1.818593 |
| SNP1-167778358 | F5        | 1 | 167778358 | 6 | 2.793546 |
| SNP1-167778358 | F5        | 1 | 167778358 | 3 | 1.180658 |
| rs4524         | F5        | 1 | 167778379 | 6 | 0.029516 |
| rs6016         | F5        | 1 | 167778744 | 3 | 0.456429 |
| rs6016         | F5        | 1 | 167778744 | 6 | 0.498672 |
| rs6035         | F5        | 1 | 167788473 | 6 | 0.014247 |
| rs6022         | F5        | 1 | 167796450 | 8 | 1.695829 |
| rs6029         | F5        | 1 | 167796597 | 8 | 1.506464 |
| rs6133         | SELP      | 1 | 167831970 | 6 | 1.186301 |
| rs6133         | SELP      | 1 | 167831970 | 7 | 0.271226 |
| rs909628       | SELL      | 1 | 167927289 | 6 | 2.261294 |
| rs4987310      | SELL      | 1 | 167940462 | 4 | 0.321388 |
| rs1051091      | SELL      | 1 | 167944333 | 6 | 0.047482 |
| rs1051091      | SELL      | 1 | 167944333 | 4 | 0.501315 |



|                |           |   |           |   |          |
|----------------|-----------|---|-----------|---|----------|
| rs3766132      | C1orf112  | 1 | 168031192 | 8 | 6.068785 |
| rs3766132      | C1orf112  | 1 | 168031192 | 7 | 0.573554 |
| rs10919246     | C1orf112  | 1 | 168031676 | 8 | 6.155009 |
| rs10919246     | C1orf112  | 1 | 168031676 | 5 | 7.131916 |
| rs10919246     | C1orf112  | 1 | 168031676 | 7 | 0.126662 |
| rs6668114      | C1orf112  | 1 | 168034704 | 7 | 5.368043 |
| rs12143301     | SCYL3     | 1 | 168090414 | 6 | 1.949268 |
| rs520525       | LOC730132 | 1 | 168904957 | 1 | 1.364215 |
| rs2294740      | C1orf129  | 1 | 169195295 | 7 | 2.033443 |
| rs2266782      | FMO3      | 1 | 169343590 | 5 | 0.728011 |
| rs2266782      | FMO3      | 1 | 169343590 | 4 | 1.188413 |
| rs1736557      | FMO3      | 1 | 169346704 | 7 | 0.693473 |
| rs909530       | FMO3      | 1 | 169349798 | 6 | 0.122326 |
| rs909530       | FMO3      | 1 | 169349798 | 4 | 0.050559 |
| rs909530       | FMO3      | 1 | 169349798 | 5 | 0.677147 |
| rs2266780      | FMO3      | 1 | 169349866 | 6 | 0.427047 |
| rs2266780      | FMO3      | 1 | 169349866 | 4 | 0.267669 |
| rs2266780      | FMO3      | 1 | 169349866 | 5 | 0.441377 |
| rs11812061     | FMO6P     | 1 | 169382269 | 6 | 1.071277 |
| rs11812061     | FMO6P     | 1 | 169382269 | 5 | 0.301388 |
| rs11812061     | FMO6P     | 1 | 169382269 | 4 | 0.326929 |
| rs2272797      | FMO6P     | 1 | 169385464 | 6 | 1.852505 |
| rs2272797      | FMO6P     | 1 | 169385464 | 5 | 0.557609 |
| rs2272797      | FMO6P     | 1 | 169385464 | 4 | 0.614623 |
| rs7889839      | FMO6P     | 1 | 169387797 | 6 | 0.289894 |
| rs7889839      | FMO6P     | 1 | 169387797 | 4 | 0.885837 |
| rs7889839      | FMO6P     | 1 | 169387797 | 5 | 0.112657 |
| rs16864125     | FMO6P     | 1 | 169396970 | 1 | 0.052943 |
| rs16864125     | FMO6P     | 1 | 169396970 | 2 | 0.663279 |
| rs2020860      | FMO2      | 1 | 169429207 | 1 | 3.374713 |
| rs28369860     | FMO2      | 1 | 169432427 | 1 | 5.991274 |
| rs28369914     | FMO2      | 1 | 169445114 | 2 | 5.064752 |
| rs7512785      | FMO2      | 1 | 169445911 | 7 | 3.396323 |
| rs7512785      | FMO2      | 1 | 169445911 | 4 | 2.924039 |
| rs7877         | FMO1      | 1 | 169521514 | 1 | 2.758985 |
| rs235501       | BAT2D1    | 1 | 169822789 | 2 | 5.172965 |
| rs235501       | BAT2D1    | 1 | 169822789 | 4 | 0.891637 |
| SNP1-169888148 | MYOC      | 1 | 169888148 | 5 | 2.163011 |
| SNP1-169888148 | MYOC      | 1 | 169888148 | 8 | 2.319808 |
| rs9661596      | LOC391135 | 1 | 169919287 | 2 | 2.567641 |
| rs9661596      | LOC391135 | 1 | 169919287 | 4 | 3.612651 |
| rs9661596      | LOC391135 | 1 | 169919287 | 6 | 1.272386 |
| rs9661596      | LOC391135 | 1 | 169919287 | 7 | 2.196912 |
| rs2294719      | KIAA0859  | 1 | 170017674 | 2 | 3.50914  |
| rs2294719      | KIAA0859  | 1 | 170017674 | 4 | 0.071629 |
| rs2294719      | KIAA0859  | 1 | 170017674 | 7 | 0.961984 |
| rs2294719      | KIAA0859  | 1 | 170017674 | 5 | 0.83717  |

|            |           |   |           |   |          |
|------------|-----------|---|-----------|---|----------|
| rs2294719  | KIAA0859  | 1 | 170017674 | 8 | 6.287059 |
| rs2294720  | KIAA0859  | 1 | 170017859 | 4 | 0.347494 |
| rs2294720  | KIAA0859  | 1 | 170017859 | 2 | 4.533059 |
| rs2294720  | KIAA0859  | 1 | 170017859 | 5 | 0.299382 |
| rs2294720  | KIAA0859  | 1 | 170017859 | 7 | 1.031061 |
| rs2294720  | KIAA0859  | 1 | 170017859 | 8 | 2.7485   |
| rs2232825  | KIAA0859  | 1 | 170030172 | 6 | 0.483916 |
| rs2232825  | KIAA0859  | 1 | 170030172 | 5 | 8.553045 |
| rs3736790  | DNM3      | 1 | 170223426 | 1 | 0.904675 |
| rs3736790  | DNM3      | 1 | 170223426 | 2 | 0.798079 |
| rs3736790  | DNM3      | 1 | 170223426 | 4 | 0.165492 |
| rs3736790  | DNM3      | 1 | 170223426 | 6 | 1.242746 |
| rs10489282 | DNM3      | 1 | 170643669 | 3 | 0.008415 |
| rs9425601  | DNM3      | 1 | 170643885 | 3 | 1.416796 |
| rs9425601  | DNM3      | 1 | 170643885 | 6 | 0.127142 |
| rs9425601  | DNM3      | 1 | 170643885 | 5 | 1.266272 |
| rs9425601  | DNM3      | 1 | 170643885 | 8 | 0.562372 |
| rs17278379 | DNM3      | 1 | 170647907 | 8 | 2.606968 |
| rs17278379 | DNM3      | 1 | 170647907 | 3 | 0.538339 |
| rs7528296  | DNM3      | 1 | 170648006 | 8 | 5.55884  |
| rs7528296  | DNM3      | 1 | 170648006 | 2 | 4.66255  |
| rs7528296  | DNM3      | 1 | 170648006 | 6 | 1.606599 |
| rs7528296  | DNM3      | 1 | 170648006 | 5 | 0.249893 |
| rs2239816  | C1orf9    | 1 | 170768266 | 1 | 4.864884 |
| rs2239816  | C1orf9    | 1 | 170768266 | 4 | 0.487203 |
| rs2239816  | C1orf9    | 1 | 170768266 | 5 | 0.815642 |
| rs6663179  | LOC391139 | 1 | 171377576 | 7 | 1.297616 |
| rs6663179  | LOC391139 | 1 | 171377576 | 3 | 1.486366 |
| rs3900307  | TNFSF4    | 1 | 171420065 | 3 | 0.421815 |
| rs7514229  | TNFSF4    | 1 | 171420927 | 1 | 0.508871 |
| rs7514229  | TNFSF4    | 1 | 171420927 | 3 | 0.51256  |
| rs7514229  | TNFSF4    | 1 | 171420927 | 8 | 0.022047 |
| rs17372309 | TNFSF4    | 1 | 171421162 | 1 | 2.237138 |
| rs17372309 | TNFSF4    | 1 | 171421162 | 8 | 0.696796 |
| rs17372309 | TNFSF4    | 1 | 171421162 | 6 | 0.048941 |
| rs12140760 | LOC646870 | 1 | 171696618 | 8 | 1.540313 |
| rs12140760 | LOC646870 | 1 | 171696618 | 4 | 1.481467 |
| rs12140760 | LOC646870 | 1 | 171696618 | 2 | 2.525564 |
| rs12140760 | LOC646870 | 1 | 171696618 | 3 | 0.719307 |
| rs5878     | SERPINC1  | 1 | 172145455 | 3 | 0.209087 |
| rs5878     | SERPINC1  | 1 | 172145455 | 4 | 2.941296 |
| rs5877     | SERPINC1  | 1 | 172145485 | 3 | 0.865274 |
| rs5877     | SERPINC1  | 1 | 172145485 | 4 | 1.55809  |
| rs6703547  | RC3H1     | 1 | 172174435 | 5 | 1.242817 |
| rs6703547  | RC3H1     | 1 | 172174435 | 4 | 1.072869 |
| rs7516240  | GPR52     | 1 | 172683854 | 3 | 0.775596 |
| rs1034462  | CACYBP    | 1 | 173246946 | 4 | 0.896182 |

|                |           |   |           |   |          |
|----------------|-----------|---|-----------|---|----------|
| rs1034462      | CACYBP    | 1 | 173246946 | 6 | 0.76629  |
| rs10912897     | TNN       | 1 | 173380201 | 1 | 0.020835 |
| rs859427       | TNR       | 1 | 173615346 | 1 | 0.90976  |
| rs859437       | TNR       | 1 | 173622014 | 7 | 0.062708 |
| rs859437       | TNR       | 1 | 173622014 | 3 | 0.064326 |
| rs859437       | TNR       | 1 | 173622014 | 2 | 0.333243 |
| rs12118034     | PAPPA2    | 1 | 175075991 | 5 | 0.781372 |
| rs1044299      | PAPPA2    | 1 | 175078496 | 7 | 0.860453 |
| rs1044299      | PAPPA2    | 1 | 175078496 | 3 | 0.084672 |
| rs1044299      | PAPPA2    | 1 | 175078496 | 6 | 3.19263  |
| rs1044299      | PAPPA2    | 1 | 175078496 | 5 | 0.937813 |
| rs1044299      | PAPPA2    | 1 | 175078496 | 8 | 1.06814  |
| rs2228956      | ASTN1     | 1 | 175130490 | 3 | 1.163175 |
| rs172917       | ASTN1     | 1 | 175259176 | 8 | 0.252194 |
| rs3176441      | FAM5B     | 1 | 175465621 | 3 | 0.465916 |
| rs3176443      | FAM5B     | 1 | 175514477 | 8 | 4.069216 |
| rs3829804      | LOC400796 | 1 | 175629290 | 5 | 0.429146 |
| rs3829804      | LOC400796 | 1 | 175629290 | 3 | 1.043255 |
| rs3829799      | LOC400796 | 1 | 175629502 | 1 | 2.540114 |
| SNP1-176168278 | SEC16B    | 1 | 176168278 | 1 | 0.486341 |
| SNP1-176168278 | SEC16B    | 1 | 176168278 | 7 | 0.558409 |
| SNP1-176168278 | SEC16B    | 1 | 176168278 | 4 | 5.158698 |
| SNP1-176168278 | SEC16B    | 1 | 176168278 | 2 | 3.725993 |
| rs3813649      | SEC16B    | 1 | 176169348 | 4 | 1.046929 |
| rs3813649      | SEC16B    | 1 | 176169348 | 2 | 2.510652 |
| rs3813649      | SEC16B    | 1 | 176169348 | 7 | 0.653242 |
| rs3813649      | SEC16B    | 1 | 176169348 | 1 | 0.700013 |
| rs591120       | SEC16B    | 1 | 176169376 | 7 | 0.102005 |
| rs7522194      | SEC16B    | 1 | 176172092 | 1 | 0.81478  |
| rs7522194      | SEC16B    | 1 | 176172092 | 7 | 2.157454 |
| rs7522194      | SEC16B    | 1 | 176172092 | 4 | 0.36606  |
| rs7522194      | SEC16B    | 1 | 176172092 | 2 | 0.338587 |
| rs12129817     | SEC16B    | 1 | 176190063 | 3 | 1.363317 |
| rs7413442      | SEC16B    | 1 | 176196563 | 2 | 4.850297 |
| rs7413442      | SEC16B    | 1 | 176196563 | 3 | 0.662792 |
| rs7413442      | SEC16B    | 1 | 176196563 | 6 | 0.165163 |
| rs12410468     | LOC730102 | 1 | 176266390 | 5 | 0.882782 |
| rs12410468     | LOC730102 | 1 | 176266390 | 1 | 0.75852  |
| rs12410468     | LOC730102 | 1 | 176266390 | 2 | 0.377124 |
| rs12410468     | LOC730102 | 1 | 176266390 | 4 | 0.736899 |
| rs2746325      | FLJ44005  | 1 | 176730214 | 1 | 0.024865 |
| rs10913567     | C1orf220  | 1 | 176778564 | 1 | 1.098829 |
| rs10913567     | C1orf220  | 1 | 176778564 | 6 | 2.526634 |
| rs12568310     | C1orf220  | 1 | 176781245 | 1 | 6.836353 |
| rs4650995      | C1orf220  | 1 | 176783939 | 6 | 0.123943 |
| rs4650995      | C1orf220  | 1 | 176783939 | 3 | 1.106513 |
| rs4650995      | C1orf220  | 1 | 176783939 | 1 | 4.636266 |

|                |           |   |           |   |          |
|----------------|-----------|---|-----------|---|----------|
| rs4650996      | C1orf220  | 1 | 176783988 | 1 | 0.907083 |
| rs4233175      | C1orf220  | 1 | 176784214 | 3 | 0.423495 |
| rs10913569     | C1orf220  | 1 | 176784631 | 3 | 1.506603 |
| rs12026782     | LOC646976 | 1 | 176960082 | 1 | 5.969296 |
| rs1544124      | ANGPTL1   | 1 | 177086782 | 7 | 1.863191 |
| rs1544124      | ANGPTL1   | 1 | 177086782 | 3 | 0.91671  |
| rs4652352      | FAM20B    | 1 | 177308923 | 6 | 3.725497 |
| rs4652352      | FAM20B    | 1 | 177308923 | 1 | 5.989799 |
| rs4652352      | FAM20B    | 1 | 177308923 | 8 | 0.513851 |
| rs4652352      | FAM20B    | 1 | 177308923 | 5 | 0.458644 |
| rs4652352      | FAM20B    | 1 | 177308923 | 7 | 1.878452 |
| rs4652352      | FAM20B    | 1 | 177308923 | 4 | 1.224034 |
| rs4652352      | FAM20B    | 1 | 177308923 | 3 | 0.62017  |
| rs3766625      | FAM20B    | 1 | 177310176 | 4 | 1.24544  |
| rs3766625      | FAM20B    | 1 | 177310176 | 7 | 5.469637 |
| rs3766625      | FAM20B    | 1 | 177310176 | 6 | 1.40193  |
| rs2296377      | TOR3A     | 1 | 177317923 | 8 | 0.460594 |
| rs2296377      | TOR3A     | 1 | 177317923 | 3 | 0.60269  |
| rs2296377      | TOR3A     | 1 | 177317923 | 1 | 2.956606 |
| rs2296377      | TOR3A     | 1 | 177317923 | 5 | 0.088422 |
| rs1128952      | TOR3A     | 1 | 177331748 | 3 | 0.884775 |
| rs1128952      | TOR3A     | 1 | 177331748 | 7 | 0.236163 |
| rs1128952      | TOR3A     | 1 | 177331748 | 8 | 7.782713 |
| rs1128952      | TOR3A     | 1 | 177331748 | 1 | 5.926745 |
| rs1318056      | ABL2      | 1 | 177378768 | 4 | 0.243206 |
| rs11577579     | C1orf125  | 1 | 177680728 | 8 | 3.904948 |
| SNP1-177770666 | C1orf125  | 1 | 177770666 | 8 | 1.292384 |
| SNP1-177770666 | C1orf125  | 1 | 177770666 | 1 | 2.118615 |
| SNP1-177770666 | C1orf125  | 1 | 177770666 | 5 | 1.333379 |
| SNP1-177770666 | C1orf125  | 1 | 177770666 | 2 | 0.136533 |
| rs2274623      | NPHS2     | 1 | 177786731 | 1 | 2.198743 |
| rs744446       | LOC126860 | 1 | 177824674 | 7 | 1.359518 |
| rs744446       | LOC126860 | 1 | 177824674 | 5 | 1.853521 |
| rs12070589     | TDRD5     | 1 | 177829330 | 5 | 3.011172 |
| rs35448215     | TDRD5     | 1 | 177897865 | 6 | 3.555233 |
| rs35448215     | TDRD5     | 1 | 177897865 | 2 | 0.992453 |
| rs35448215     | TDRD5     | 1 | 177897865 | 4 | 0.026457 |
| rs35448215     | TDRD5     | 1 | 177897865 | 1 | 2.367914 |
| rs35448215     | TDRD5     | 1 | 177897865 | 8 | 4.155967 |
| rs1052447      | LOC730113 | 1 | 177978272 | 5 | 0.077326 |
| rs2477120      | CEP350    | 1 | 178256365 | 1 | 0.114228 |
| rs2477120      | CEP350    | 1 | 178256365 | 2 | 2.588135 |
| rs2477120      | CEP350    | 1 | 178256365 | 8 | 0.715205 |
| rs2477120      | CEP350    | 1 | 178256365 | 4 | 0.156127 |
| rs10913939     | QSOX1     | 1 | 178411108 | 1 | 4.676075 |
| rs2298206      | QSOX1     | 1 | 178411711 | 4 | 5.061474 |
| rs2298206      | QSOX1     | 1 | 178411711 | 6 | 0.656624 |

|                |           |   |           |   |          |
|----------------|-----------|---|-----------|---|----------|
| rs17855475     | QSOX1     | 1 | 178414635 | 1 | 5.543297 |
| rs7521513      | QSOX1     | 1 | 178426277 | 1 | 4.098741 |
| rs17302207     | KIAA1614  | 1 | 179171886 | 3 | 0.327674 |
| rs3795505      | KIAA1614  | 1 | 179171975 | 3 | 0.603455 |
| rs3795504      | KIAA1614  | 1 | 179172071 | 7 | 0.302294 |
| rs3795504      | KIAA1614  | 1 | 179172071 | 3 | 0.498055 |
| rs12023606     | KIAA1614  | 1 | 179181589 | 7 | 0.122802 |
| rs870046       | LOC391142 | 1 | 179189430 | 3 | 0.795666 |
| rs870046       | LOC391142 | 1 | 179189430 | 8 | 6.693924 |
| rs870046       | LOC391142 | 1 | 179189430 | 4 | 0.45683  |
| rs6425663      | IER5      | 1 | 179324497 | 4 | 1.834853 |
| rs6425663      | IER5      | 1 | 179324497 | 2 | 4.738962 |
| rs3747955      | IER5      | 1 | 179324936 | 2 | 1.315838 |
| rs3747955      | IER5      | 1 | 179324936 | 1 | 0.915663 |
| rs16858474     | ZNF648    | 1 | 180291476 | 1 | 3.551116 |
| rs912902       | GLUL      | 1 | 180627553 | 7 | 1.901845 |
| rs912902       | GLUL      | 1 | 180627553 | 2 | 5.254392 |
| rs2038891      | TEDDM1    | 1 | 180634171 | 2 | 2.192246 |
| rs2038891      | TEDDM1    | 1 | 180634171 | 4 | 0.794671 |
| rs2038891      | TEDDM1    | 1 | 180634171 | 3 | 0.780481 |
| rs6424853      | TEDDM1    | 1 | 180634516 | 4 | 0.042193 |
| rs6424853      | TEDDM1    | 1 | 180634516 | 3 | 0.701906 |
| rs6424853      | TEDDM1    | 1 | 180634516 | 6 | 0.171924 |
| rs6698722      | TEDDM1    | 1 | 180635701 | 2 | 1.565858 |
| rs6674281      | TEDDM1    | 1 | 180635856 | 6 | 0.531791 |
| rs6674281      | TEDDM1    | 1 | 180635856 | 3 | 0.675994 |
| rs6674281      | TEDDM1    | 1 | 180635856 | 4 | 0.463302 |
| rs7551829      | TEDDM1    | 1 | 180636361 | 2 | 3.014391 |
| rs7551829      | TEDDM1    | 1 | 180636361 | 7 | 0.345996 |
| rs1048260      | RNASEL    | 1 | 180809474 | 1 | 0.319444 |
| rs1048260      | RNASEL    | 1 | 180809474 | 2 | 4.794315 |
| rs1048260      | RNASEL    | 1 | 180809474 | 5 | 0.222972 |
| rs680431       | RGS16     | 1 | 180835352 | 5 | 11.91951 |
| rs680431       | RGS16     | 1 | 180835352 | 2 | 3.712713 |
| rs680431       | RGS16     | 1 | 180835352 | 7 | 4.74945  |
| rs20562        | LAMC1     | 1 | 181351309 | 2 | 4.835955 |
| SNP1-181352378 | LAMC1     | 1 | 181352378 | 5 | 0.234557 |
| SNP1-181352378 | LAMC1     | 1 | 181352378 | 6 | 7.725432 |
| SNP1-181352378 | LAMC1     | 1 | 181352378 | 8 | 9.10105  |
| rs4651146      | LAMC1     | 1 | 181372157 | 8 | 1.73932  |
| rs4651146      | LAMC1     | 1 | 181372157 | 6 | 2.955839 |
| rs4651146      | LAMC1     | 1 | 181372157 | 5 | 3.716442 |
| rs3818419      | LAMC1     | 1 | 181372328 | 5 | 0.298177 |
| rs3818419      | LAMC1     | 1 | 181372328 | 6 | 4.854343 |
| rs3818419      | LAMC1     | 1 | 181372328 | 8 | 1.077    |
| rs3359         | LAMC1     | 1 | 181378664 | 5 | 0.784013 |
| rs3359         | LAMC1     | 1 | 181378664 | 6 | 0.297917 |

|                |         |   |           |   |          |
|----------------|---------|---|-----------|---|----------|
| rs3359         | LAMC1   | 1 | 181378664 | 8 | 6.429233 |
| rs1547714      | LAMC1   | 1 | 181380742 | 8 | 3.793196 |
| rs1547714      | LAMC1   | 1 | 181380742 | 5 | 0.458771 |
| rs1547714      | LAMC1   | 1 | 181380742 | 6 | 6.183402 |
| rs2274980      | LAMC2   | 1 | 181451239 | 3 | 0.260862 |
| rs2274980      | LAMC2   | 1 | 181451239 | 4 | 0.299368 |
| rs11586699     | LAMC2   | 1 | 181451313 | 2 | 0.118088 |
| rs11586699     | LAMC2   | 1 | 181451313 | 1 | 0.15724  |
| rs1129723      | LAMC2   | 1 | 181454226 | 3 | 0.93218  |
| rs1129723      | LAMC2   | 1 | 181454226 | 4 | 5.255448 |
| rs1129723      | LAMC2   | 1 | 181454226 | 6 | 0.159344 |
| rs10797863     | LAMC2   | 1 | 181480033 | 6 | 1.403238 |
| rs2021320      | NMNAT2  | 1 | 181485971 | 6 | 7.309307 |
| rs3738818      | NMNAT2  | 1 | 181488256 | 4 | 0.225553 |
| rs2298083      | SMG7    | 1 | 181782051 | 6 | 9.506978 |
| rs1044879      | SMG7    | 1 | 181789375 | 8 | 8.631143 |
| rs1044879      | SMG7    | 1 | 181789375 | 3 | 0.325825 |
| rs1044879      | SMG7    | 1 | 181789375 | 2 | 2.079019 |
| rs2274065      | NCF2    | 1 | 181826327 | 8 | 0.950899 |
| rs2231241      | ARPC5   | 1 | 181863326 | 2 | 0.580788 |
| rs1174656      | APOBEC4 | 1 | 181883310 | 1 | 0.227646 |
| rs10911388     | APOBEC4 | 1 | 181883404 | 2 | 1.260676 |
| rs10911391     | APOBEC4 | 1 | 181883717 | 2 | 2.843606 |
| rs1174658      | APOBEC4 | 1 | 181883728 | 5 | 1.150218 |
| rs1174658      | APOBEC4 | 1 | 181883728 | 1 | 4.957939 |
| rs6699011      | APOBEC4 | 1 | 181889002 | 2 | 3.525192 |
| rs1053092      | GLT25D2 | 1 | 182171811 | 1 | 3.045991 |
| rs1053092      | GLT25D2 | 1 | 182171811 | 5 | 0.043783 |
| rs1053092      | GLT25D2 | 1 | 182171811 | 8 | 0.052538 |
| rs2986573      | GLT25D2 | 1 | 182172632 | 7 | 0.095287 |
| rs2986573      | GLT25D2 | 1 | 182172632 | 4 | 3.842867 |
| rs2986573      | GLT25D2 | 1 | 182172632 | 2 | 2.14672  |
| rs2986573      | GLT25D2 | 1 | 182172632 | 3 | 0.158912 |
| rs11583641     | GLT25D2 | 1 | 182172868 | 1 | 4.227698 |
| rs11583641     | GLT25D2 | 1 | 182172868 | 3 | 0.549109 |
| rs11583641     | GLT25D2 | 1 | 182172868 | 4 | 1.334757 |
| rs11583641     | GLT25D2 | 1 | 182172868 | 7 | 1.014262 |
| rs3828027      | GLT25D2 | 1 | 182173875 | 4 | 0.999606 |
| rs3828027      | GLT25D2 | 1 | 182173875 | 3 | 0.561864 |
| rs2296713      | GLT25D2 | 1 | 182176340 | 5 | 2.416471 |
| rs2296713      | GLT25D2 | 1 | 182176340 | 8 | 4.87115  |
| rs7535067      | C1orf21 | 1 | 182863207 | 2 | 5.455744 |
| rs1046239      | EDEM3   | 1 | 182926828 | 7 | 1.02391  |
| rs1046239      | EDEM3   | 1 | 182926828 | 1 | 8.702028 |
| SNP1-182938721 | EDEM3   | 1 | 182938721 | 4 | 7.730188 |
| rs7360         | FAM129A | 1 | 183027056 | 1 | 2.893542 |
| rs7360         | FAM129A | 1 | 183027056 | 7 | 0.635519 |

|                |         |   |           |   |          |
|----------------|---------|---|-----------|---|----------|
| rs682331       | FAM129A | 1 | 183027988 | 3 | 0.027525 |
| rs682331       | FAM129A | 1 | 183027988 | 8 | 0.855137 |
| rs682331       | FAM129A | 1 | 183027988 | 7 | 0.199712 |
| rs581100       | FAM129A | 1 | 183030690 | 8 | 5.443783 |
| rs581100       | FAM129A | 1 | 183030690 | 3 | 0.255692 |
| rs581100       | FAM129A | 1 | 183030690 | 1 | 4.95793  |
| rs12030554     | C1orf25 | 1 | 183354257 | 7 | 3.951737 |
| rs12030554     | C1orf25 | 1 | 183354257 | 8 | 0.180971 |
| rs12030554     | C1orf25 | 1 | 183354257 | 4 | 0.239792 |
| rs12030554     | C1orf25 | 1 | 183354257 | 5 | 0.136359 |
| rs12030554     | C1orf25 | 1 | 183354257 | 1 | 0.03165  |
| rs950327       | C1orf26 | 1 | 183402368 | 1 | 0.595633 |
| rs950327       | C1orf26 | 1 | 183402368 | 5 | 0.537988 |
| rs950327       | C1orf26 | 1 | 183402368 | 7 | 0.160209 |
| rs950327       | C1orf26 | 1 | 183402368 | 4 | 0.8846   |
| rs10489579     | C1orf26 | 1 | 183410344 | 4 | 2.969924 |
| rs10489579     | C1orf26 | 1 | 183410344 | 7 | 0.914518 |
| rs10489579     | C1orf26 | 1 | 183410344 | 8 | 0.295586 |
| rs10489579     | C1orf26 | 1 | 183410344 | 5 | 4.662103 |
| rs10489579     | C1orf26 | 1 | 183410344 | 1 | 0.256359 |
| rs10489579     | C1orf26 | 1 | 183410344 | 2 | 1.501136 |
| rs12041704     | C1orf26 | 1 | 183507097 | 1 | 1.132332 |
| rs12041704     | C1orf26 | 1 | 183507097 | 3 | 0.502231 |
| SNP1-184218124 | HMCN1   | 1 | 184218124 | 2 | 0.565396 |
| SNP1-184218124 | HMCN1   | 1 | 184218124 | 7 | 0.267034 |
| SNP1-184218124 | HMCN1   | 1 | 184218124 | 6 | 0.042785 |
| SNP1-184218124 | HMCN1   | 1 | 184218124 | 4 | 1.672797 |
| SNP1-184218124 | HMCN1   | 1 | 184218124 | 1 | 0.270926 |
| SNP1-184218124 | HMCN1   | 1 | 184218124 | 5 | 0.180704 |
| SNP1-184218124 | HMCN1   | 1 | 184218124 | 3 | 1.019963 |
| SNP1-184218124 | HMCN1   | 1 | 184218124 | 8 | 0.963516 |
| rs6665753      | HMCN1   | 1 | 184251140 | 8 | 3.304591 |
| rs6665753      | HMCN1   | 1 | 184251140 | 3 | 0.842176 |
| rs6665753      | HMCN1   | 1 | 184251140 | 7 | 1.01147  |
| rs12129650     | HMCN1   | 1 | 184293097 | 7 | 0.732261 |
| rs12129650     | HMCN1   | 1 | 184293097 | 8 | 0.576502 |
| rs12129650     | HMCN1   | 1 | 184293097 | 3 | 0.681591 |
| rs12129650     | HMCN1   | 1 | 184293097 | 5 | 2.029432 |
| rs10911825     | HMCN1   | 1 | 184368162 | 8 | 1.990168 |
| rs10911825     | HMCN1   | 1 | 184368162 | 7 | 1.069222 |
| rs10911825     | HMCN1   | 1 | 184368162 | 6 | 0.176638 |
| rs2273779      | PRG4    | 1 | 184540617 | 4 | 2.856689 |
| rs3737940      | PRG4    | 1 | 184544612 | 2 | 3.575294 |
| rs3737940      | PRG4    | 1 | 184544612 | 7 | 1.657882 |
| rs3737940      | PRG4    | 1 | 184544612 | 4 | 1.599115 |
| rs3737940      | PRG4    | 1 | 184544612 | 8 | 1.40183  |
| rs3737940      | PRG4    | 1 | 184544612 | 6 | 5.395527 |

|                |           |   |           |   |          |
|----------------|-----------|---|-----------|---|----------|
| SNP1-184587865 | TPR       | 1 | 184587865 | 4 | 7.450393 |
| SNP1-184587865 | TPR       | 1 | 184587865 | 6 | 7.0783   |
| rs8824         | C1orf27   | 1 | 184656926 | 8 | 4.468291 |
| rs8824         | C1orf27   | 1 | 184656926 | 2 | 4.555503 |
| rs8824         | C1orf27   | 1 | 184656926 | 4 | 0.7265   |
| rs8824         | C1orf27   | 1 | 184656926 | 6 | 6.027863 |
| rs35066734     | PDC       | 1 | 184679536 | 7 | 1.589918 |
| rs5277         | PTGS2     | 1 | 184914820 | 4 | 1.09396  |
| rs10753015     | C1orf99   | 1 | 185877855 | 3 | 1.416573 |
| rs16829304     | LOC647132 | 1 | 188225406 | 2 | 4.991334 |
| rs16829304     | LOC647132 | 1 | 188225406 | 1 | 4.810873 |
| rs4606         | RGS2      | 1 | 191047795 | 4 | 5.011286 |
| rs4606         | RGS2      | 1 | 191047795 | 7 | 0.721335 |
| rs4606         | RGS2      | 1 | 191047795 | 3 | 0.358638 |
| rs4606         | RGS2      | 1 | 191047795 | 6 | 0.577914 |
| rs10921310     | GLRX2     | 1 | 191341274 | 5 | 0.119941 |
| rs912071       | GLRX2     | 1 | 191341731 | 5 | 0.324144 |
| rs1065489      | CFH       | 1 | 194976397 | 6 | 0.940693 |
| rs1065489      | CFH       | 1 | 194976397 | 2 | 4.941976 |
| rs17514281     | F13B      | 1 | 195292912 | 1 | 2.555566 |
| SNP1-195337320 | ASPM      | 1 | 195337320 | 4 | 0.174542 |
| SNP1-195337320 | ASPM      | 1 | 195337320 | 1 | 2.917385 |
| SNP1-195339819 | ASPM      | 1 | 195339819 | 3 | 0.204194 |
| SNP1-195339819 | ASPM      | 1 | 195339819 | 8 | 1.362376 |
| rs4639796      | ZBTB41    | 1 | 195393272 | 8 | 5.305836 |
| rs4639796      | ZBTB41    | 1 | 195393272 | 7 | 0.527495 |
| rs10922251     | DENND1B   | 1 | 195788433 | 1 | 4.343955 |
| rs6677361      | DENND1B   | 1 | 195788500 | 1 | 4.829303 |
| rs6677361      | DENND1B   | 1 | 195788500 | 4 | 1.381462 |
| rs2270763      | C1orf53   | 1 | 196141572 | 3 | 0.810939 |
| rs2270763      | C1orf53   | 1 | 196141572 | 4 | 1.94579  |
| rs2270763      | C1orf53   | 1 | 196141572 | 5 | 0.036768 |
| rs2690034      | NR5A2     | 1 | 198410467 | 5 | 0.332697 |
| rs12744809     | DDX59     | 1 | 198859948 | 1 | 0.210546 |
| rs2808257      | DDX59     | 1 | 198860628 | 1 | 2.058344 |
| rs6665604      | DDX59     | 1 | 198884861 | 6 | 3.55171  |
| rs2271018      | C1orf106  | 1 | 199134115 | 2 | 0.235655 |
| rs2271018      | C1orf106  | 1 | 199134115 | 8 | 6.227645 |
| rs2271018      | C1orf106  | 1 | 199134115 | 1 | 0.67965  |
| rs2271018      | C1orf106  | 1 | 199134115 | 4 | 0.517523 |
| rs2271017      | C1orf106  | 1 | 199134175 | 8 | 0.097947 |
| rs2271017      | C1orf106  | 1 | 199134175 | 1 | 4.554812 |
| rs425079       | C1orf81   | 1 | 199168039 | 1 | 1.994771 |
| rs3208703      | KIF21B    | 1 | 199206265 | 2 | 2.534878 |
| rs3198583      | KIF21B    | 1 | 199206803 | 2 | 1.982667 |
| rs3198583      | KIF21B    | 1 | 199206803 | 1 | 1.662516 |
| rs3198583      | KIF21B    | 1 | 199206803 | 4 | 2.576164 |



|            |               |   |           |   |          |
|------------|---------------|---|-----------|---|----------|
| rs11586032 | KIF21B        | 1 | 199209008 | 7 | 0.585363 |
| rs13374149 | CACNA1S       | 1 | 199279107 | 3 | 1.812706 |
| rs2282415  | DKFZp434B1231 | 1 | 199449986 | 5 | 2.246116 |
| rs2275673  | DKFZp434B1231 | 1 | 199450898 | 1 | 2.304916 |
| rs2275673  | DKFZp434B1231 | 1 | 199450898 | 5 | 2.595467 |
| rs2275673  | DKFZp434B1231 | 1 | 199450898 | 3 | 1.951803 |
| rs3738270  | DKFZp434B1231 | 1 | 199461742 | 2 | 1.676143 |
| rs3738270  | DKFZp434B1231 | 1 | 199461742 | 7 | 2.561794 |
| rs3738270  | DKFZp434B1231 | 1 | 199461742 | 4 | 2.393598 |
| rs3738270  | DKFZp434B1231 | 1 | 199461742 | 3 | 2.373413 |
| rs14061    | DKFZp434B1231 | 1 | 199464404 | 8 | 0.708986 |
| rs14061    | DKFZp434B1231 | 1 | 199464404 | 5 | 1.823185 |
| rs14061    | DKFZp434B1231 | 1 | 199464404 | 7 | 2.033058 |
| rs14061    | DKFZp434B1231 | 1 | 199464404 | 1 | 1.470493 |
| rs2268147  | PKP1          | 1 | 199519489 | 7 | 0.032474 |
| rs2268147  | PKP1          | 1 | 199519489 | 2 | 4.735168 |
| rs11805972 | LAD1          | 1 | 199622276 | 6 | 6.058415 |
| rs3738281  | LAD1          | 1 | 199624927 | 4 | 0.659556 |
| rs2799680  | TNNI1         | 1 | 199641300 | 8 | 1.64929  |
| rs2799680  | TNNI1         | 1 | 199641300 | 7 | 1.378996 |
| rs1256945  | TNNI1         | 1 | 199642281 | 8 | 0.377268 |
| rs1256945  | TNNI1         | 1 | 199642281 | 7 | 0.351239 |
| rs1256946  | TNNI1         | 1 | 199642374 | 7 | 0.460126 |
| rs1256948  | TNNI1         | 1 | 199642884 | 8 | 3.442449 |
| rs1256948  | TNNI1         | 1 | 199642884 | 6 | 0.724732 |
| rs1262295  | TNNI1         | 1 | 199644061 | 1 | 0.133672 |
| rs4915521  | TNNI1         | 1 | 199644508 | 1 | 1.47037  |
| rs3738286  | TNNI1         | 1 | 199653539 | 2 | 4.913628 |
| rs12409710 | PHLDA3        | 1 | 199701926 | 5 | 0.872991 |
| rs1256930  | PHLDA3        | 1 | 199704100 | 7 | 0.326106 |
| rs2279681  | TMEM58        | 1 | 200127639 | 4 | 0.335682 |
| rs2279681  | TMEM58        | 1 | 200127639 | 8 | 0.710593 |
| rs2279681  | TMEM58        | 1 | 200127639 | 5 | 0.083052 |
| rs2279681  | TMEM58        | 1 | 200127639 | 6 | 0.902636 |
| rs2279681  | TMEM58        | 1 | 200127639 | 7 | 0.399457 |
| rs2279681  | TMEM58        | 1 | 200127639 | 1 | 6.267824 |
| rs8028     | LMOD1         | 1 | 200132386 | 5 | 0.967452 |
| rs2820312  | LMOD1         | 1 | 200135880 | 5 | 0.188755 |
| rs2819360  | ELF3          | 1 | 200243877 | 7 | 0.217655 |
| rs2819360  | ELF3          | 1 | 200243877 | 4 | 0.372808 |
| rs2819360  | ELF3          | 1 | 200243877 | 3 | 0.315466 |
| rs2819360  | ELF3          | 1 | 200243877 | 1 | 5.019062 |
| rs9427715  | ELF3          | 1 | 200244450 | 4 | 0.753599 |
| rs9427715  | ELF3          | 1 | 200244450 | 7 | 0.811121 |
| rs9427715  | ELF3          | 1 | 200244450 | 5 | 0.732327 |
| rs9427715  | ELF3          | 1 | 200244450 | 1 | 3.027276 |
| rs9427715  | ELF3          | 1 | 200244450 | 3 | 0.029717 |

|                |           |   |           |   |          |
|----------------|-----------|---|-----------|---|----------|
| rs10920304     | ELF3      | 1 | 200244946 | 1 | 3.898376 |
| rs10920304     | ELF3      | 1 | 200244946 | 4 | 0.31868  |
| rs10920304     | ELF3      | 1 | 200244946 | 3 | 0.65642  |
| rs10920304     | ELF3      | 1 | 200244946 | 7 | 0.723808 |
| rs3806357      | ELF3      | 1 | 200246078 | 7 | 0.103772 |
| rs2819361      | ELF3      | 1 | 200246742 | 4 | 7.291317 |
| rs2819361      | ELF3      | 1 | 200246742 | 1 | 4.465481 |
| rs2819361      | ELF3      | 1 | 200246742 | 3 | 0.264467 |
| rs2819361      | ELF3      | 1 | 200246742 | 5 | 0.316998 |
| rs3795596      | GPR37L1   | 1 | 200359038 | 1 | 0.289779 |
| rs7516762      | GPR37L1   | 1 | 200359203 | 1 | 1.574315 |
| rs2070257      | PTPN7     | 1 | 200383625 | 1 | 0.952626 |
| rs10920362     | LGR6      | 1 | 200449931 | 3 | 0.861938 |
| SNP1-200554377 | LGR6      | 1 | 200554377 | 2 | 0.448192 |
| rs788792       | LGR6      | 1 | 200555085 | 4 | 1.385593 |
| rs4950858      | PPP1R12B  | 1 | 200818723 | 5 | 0.880211 |
| rs4950858      | PPP1R12B  | 1 | 200818723 | 4 | 3.266855 |
| rs4950858      | PPP1R12B  | 1 | 200818723 | 3 | 0.3127   |
| rs504261       | SYT2      | 1 | 200832571 | 6 | 0.140905 |
| rs504261       | SYT2      | 1 | 200832571 | 3 | 0.560277 |
| rs12139944     | LOC641515 | 1 | 201061410 | 1 | 0.63017  |
| rs12139944     | LOC641515 | 1 | 201061410 | 3 | 0.584957 |
| rs12139944     | LOC641515 | 1 | 201061410 | 6 | 0.483377 |
| rs12094889     | LOC148709 | 1 | 201108956 | 1 | 1.253944 |
| rs12094889     | LOC148709 | 1 | 201108956 | 6 | 0.335713 |
| rs12094889     | LOC148709 | 1 | 201108956 | 7 | 1.470892 |
| rs11590469     | LOC148709 | 1 | 201109750 | 1 | 0.536299 |
| rs11590469     | LOC148709 | 1 | 201109750 | 7 | 0.773036 |
| rs11590469     | LOC148709 | 1 | 201109750 | 6 | 0.64237  |
| rs6692075      | LOC730246 | 1 | 201147925 | 7 | 0.981971 |
| rs6692075      | LOC730246 | 1 | 201147925 | 4 | 4.557161 |
| rs6692075      | LOC730246 | 1 | 201147925 | 8 | 5.50009  |
| rs6692075      | LOC730246 | 1 | 201147925 | 6 | 1.754055 |
| rs6692075      | LOC730246 | 1 | 201147925 | 1 | 1.34107  |
| rs6692075      | LOC730246 | 1 | 201147925 | 5 | 0.738551 |
| rs3736314      | PPFIA4    | 1 | 201291390 | 6 | 3.209509 |
| rs6682652      | PPFIA4    | 1 | 201312206 | 5 | 1.477861 |
| rs6682652      | PPFIA4    | 1 | 201312206 | 7 | 1.830916 |
| GA001571       | PPFIA4    | 1 | 201313089 | 4 | 1.454403 |
| GA001571       | PPFIA4    | 1 | 201313089 | 7 | 0.673288 |
| rs16851198     | LOC730226 | 1 | 201509317 | 5 | 2.107138 |
| rs2297952      | LOC730226 | 1 | 201509403 | 5 | 1.903656 |
| rs7208         | FMOD      | 1 | 201576503 | 7 | 2.514427 |
| rs7208         | FMOD      | 1 | 201576503 | 8 | 1.264456 |
| rs7208         | FMOD      | 1 | 201576503 | 5 | 2.849387 |
| rs4605         | FMOD      | 1 | 201576589 | 1 | 1.386064 |
| rs4605         | FMOD      | 1 | 201576589 | 5 | 4.205073 |

|                |           |   |           |   |          |
|----------------|-----------|---|-----------|---|----------|
| rs4605         | FMOD      | 1 | 201576589 | 2 | 0.173139 |
| rs4605         | FMOD      | 1 | 201576589 | 3 | 0.282822 |
| rs3738022      | FMOD      | 1 | 201577839 | 5 | 2.603594 |
| rs3738022      | FMOD      | 1 | 201577839 | 7 | 2.972874 |
| rs3738022      | FMOD      | 1 | 201577839 | 8 | 2.69133  |
| rs1166         | PRELP     | 1 | 201722844 | 5 | 4.168189 |
| rs1166         | PRELP     | 1 | 201722844 | 3 | 0.47224  |
| rs1166         | PRELP     | 1 | 201722844 | 6 | 5.36838  |
| rs1166         | PRELP     | 1 | 201722844 | 4 | 0.659929 |
| rs28484961     | LOC647250 | 1 | 201764901 | 5 | 1.056415 |
| rs2298870      | SNRPE     | 1 | 202105896 | 5 | 4.314959 |
| rs2298870      | SNRPE     | 1 | 202105896 | 3 | 0.026856 |
| rs2298870      | SNRPE     | 1 | 202105896 | 6 | 1.259447 |
| rs2298870      | SNRPE     | 1 | 202105896 | 1 | 4.515594 |
| rs4598553      | SNRPE     | 1 | 202106660 | 3 | 1.603899 |
| rs4598553      | SNRPE     | 1 | 202106660 | 6 | 0.497293 |
| rs4598553      | SNRPE     | 1 | 202106660 | 1 | 6.695474 |
| rs4598553      | SNRPE     | 1 | 202106660 | 5 | 0.102583 |
| rs1138617      | SOX13     | 1 | 202363253 | 5 | 0.907545 |
| SNP1-202387575 | ETNK2     | 1 | 202387575 | 5 | 4.023628 |
| rs6689607      | GOLT1A    | 1 | 202438719 | 5 | 0.154817 |
| rs6689607      | GOLT1A    | 1 | 202438719 | 2 | 3.222607 |
| rs11793        | PLEKHA6   | 1 | 202457035 | 4 | 0.275621 |
| rs4489623      | PLEKHA6   | 1 | 202457199 | 2 | 3.269319 |
| rs4489623      | PLEKHA6   | 1 | 202457199 | 4 | 6.200835 |
| rs17334387     | PIK3C2B   | 1 | 202663453 | 4 | 0.520596 |
| rs3765156      | PIK3C2B   | 1 | 202691651 | 4 | 0.621942 |
| rs4252745      | MDM4      | 1 | 202785810 | 3 | 0.058164 |
| rs4252745      | MDM4      | 1 | 202785810 | 4 | 0.858717 |
| rs4252745      | MDM4      | 1 | 202785810 | 5 | 0.371729 |
| rs4252745      | MDM4      | 1 | 202785810 | 6 | 2.688641 |
| rs4252745      | MDM4      | 1 | 202785810 | 8 | 0.061685 |
| rs4252745      | MDM4      | 1 | 202785810 | 2 | 2.21878  |
| rs3789046      | LRRN2     | 1 | 202853428 | 5 | 0.09362  |
| rs3789046      | LRRN2     | 1 | 202853428 | 2 | 2.177913 |
| rs3789046      | LRRN2     | 1 | 202853428 | 1 | 0.874908 |
| rs3789046      | LRRN2     | 1 | 202853428 | 8 | 3.527289 |
| rs3789046      | LRRN2     | 1 | 202853428 | 4 | 0.781529 |
| rs3789046      | LRRN2     | 1 | 202853428 | 3 | 0.007412 |
| rs11588857     | LRRN2     | 1 | 202853670 | 2 | 3.863241 |
| rs11588857     | LRRN2     | 1 | 202853670 | 4 | 1.704398 |
| rs3747632      | LRRN2     | 1 | 202853863 | 1 | 0.757886 |
| rs3747632      | LRRN2     | 1 | 202853863 | 5 | 0.099356 |
| rs3747632      | LRRN2     | 1 | 202853863 | 3 | 0.107575 |
| rs3789044      | LRRN2     | 1 | 202855724 | 7 | 0.466457 |
| rs17415240     | NFASC     | 1 | 203212494 | 2 | 4.953708 |
| rs2794866      | NFASC     | 1 | 203255158 | 1 | 1.343381 |

|            |         |   |           |   |          |
|------------|---------|---|-----------|---|----------|
| rs2841633  | NFASC   | 1 | 203255786 | 1 | 2.931038 |
| rs2841633  | NFASC   | 1 | 203255786 | 6 | 0.575437 |
| rs2841633  | NFASC   | 1 | 203255786 | 3 | 0.672736 |
| rs1042831  | CNTN2   | 1 | 203309873 | 6 | 1.05036  |
| rs1042831  | CNTN2   | 1 | 203309873 | 3 | 0.383328 |
| rs1042831  | CNTN2   | 1 | 203309873 | 5 | 0.393558 |
| rs11240351 | CNTN2   | 1 | 203310962 | 3 | 0.758454 |
| rs11240351 | CNTN2   | 1 | 203310962 | 6 | 0.117634 |
| rs11240351 | CNTN2   | 1 | 203310962 | 5 | 1.638807 |
| rs7518906  | CNTN2   | 1 | 203311489 | 4 | 0.594417 |
| rs16855045 | CNTN2   | 1 | 203313517 | 2 | 0.90669  |
| rs16855045 | CNTN2   | 1 | 203313517 | 5 | 0.383348 |
| rs12048743 | RIPK5   | 1 | 203381496 | 6 | 9.121918 |
| rs12048743 | RIPK5   | 1 | 203381496 | 3 | 0.376419 |
| rs12048743 | RIPK5   | 1 | 203381496 | 5 | 0.246729 |
| rs10900452 | RIPK5   | 1 | 203382051 | 3 | 0.063241 |
| rs3851294  | RIPK5   | 1 | 203397036 | 4 | 0.164898 |
| rs1779411  | TMCC2   | 1 | 203505153 | 1 | 0.837558 |
| rs1668867  | TMCC2   | 1 | 203506874 | 2 | 3.574349 |
| rs1668867  | TMCC2   | 1 | 203506874 | 1 | 1.302535 |
| rs17728    | TMCC2   | 1 | 203508282 | 4 | 0.559918 |
| rs7550061  | NUAK2   | 1 | 203538915 | 4 | 1.502983 |
| rs7550061  | NUAK2   | 1 | 203538915 | 7 | 4.807429 |
| rs7550061  | NUAK2   | 1 | 203538915 | 3 | 1.272123 |
| rs1106202  | NUAK2   | 1 | 203539606 | 4 | 1.707512 |
| rs1106202  | NUAK2   | 1 | 203539606 | 6 | 1.451121 |
| rs2275868  | NUAK2   | 1 | 203544404 | 5 | 0.450203 |
| rs10900482 | KLHDC8A | 1 | 203572725 | 3 | 0.584052 |
| rs10900482 | KLHDC8A | 1 | 203572725 | 7 | 3.036307 |
| rs10900482 | KLHDC8A | 1 | 203572725 | 8 | 0.631092 |
| rs10900482 | KLHDC8A | 1 | 203572725 | 4 | 1.129993 |
| rs10900482 | KLHDC8A | 1 | 203572725 | 2 | 4.375536 |
| rs1105386  | KLHDC8A | 1 | 203574970 | 5 | 0.754218 |
| rs1105387  | KLHDC8A | 1 | 203574991 | 5 | 0.408128 |
| rs3795547  | PCTK3   | 1 | 203767452 | 6 | 0.382351 |
| rs3795547  | PCTK3   | 1 | 203767452 | 2 | 5.151369 |
| rs7526132  | MFSD4   | 1 | 203820708 | 7 | 0.913158 |
| rs7526132  | MFSD4   | 1 | 203820708 | 2 | 1.023229 |
| rs7526132  | MFSD4   | 1 | 203820708 | 3 | 2.480749 |
| rs7526132  | MFSD4   | 1 | 203820708 | 4 | 1.161947 |
| rs7526132  | MFSD4   | 1 | 203820708 | 1 | 0.924703 |
| rs7515820  | MFSD4   | 1 | 203820718 | 7 | 0.103866 |
| rs7515820  | MFSD4   | 1 | 203820718 | 2 | 1.529468 |
| rs7515820  | MFSD4   | 1 | 203820718 | 1 | 1.517966 |
| rs7515820  | MFSD4   | 1 | 203820718 | 4 | 0.125179 |
| rs7515820  | MFSD4   | 1 | 203820718 | 3 | 3.410272 |
| rs3088136  | ELK4    | 1 | 203868087 | 1 | 5.009749 |

|                |          |   |           |   |          |
|----------------|----------|---|-----------|---|----------|
| rs17347787     | SLC45A3  | 1 | 203894931 | 4 | 3.475085 |
| rs17347787     | SLC45A3  | 1 | 203894931 | 1 | 3.701131 |
| rs16856287     | RAB7L1   | 1 | 204005823 | 6 | 0.501624 |
| rs1361754      | PM20D1   | 1 | 204068495 | 3 | 2.414551 |
| rs4951025      | PM20D1   | 1 | 204078451 | 5 | 2.699523 |
| rs4951025      | PM20D1   | 1 | 204078451 | 4 | 3.414171 |
| SNP1-204081108 | PM20D1   | 1 | 204081108 | 3 | 4.271163 |
| SNP1-204081108 | PM20D1   | 1 | 204081108 | 5 | 0.498894 |
| SNP1-204081108 | PM20D1   | 1 | 204081108 | 2 | 4.189858 |
| rs1891460      | PM20D1   | 1 | 204081120 | 3 | 3.428379 |
| rs6669481      | SLC26A9  | 1 | 204150897 | 1 | 0.514357 |
| rs28391411     | C1orf186 | 1 | 204406197 | 1 | 1.41243  |
| rs28391411     | C1orf186 | 1 | 204406197 | 3 | 0.990823 |
| rs2297545      | IKBKE    | 1 | 204717730 | 1 | 0.520466 |
| rs2297545      | IKBKE    | 1 | 204717730 | 5 | 0.315617 |
| rs2297545      | IKBKE    | 1 | 204717730 | 2 | 1.003275 |
| rs2297545      | IKBKE    | 1 | 204717730 | 3 | 0.998964 |
| rs3748022      | IKBKE    | 1 | 204736088 | 3 | 8.737995 |
| rs3748022      | IKBKE    | 1 | 204736088 | 5 | 0.157351 |
| rs10836        | IKBKE    | 1 | 204736792 | 1 | 0.385724 |
| rs10836        | IKBKE    | 1 | 204736792 | 5 | 0.226066 |
| rs10836        | IKBKE    | 1 | 204736792 | 7 | 4.683222 |
| rs10836        | IKBKE    | 1 | 204736792 | 3 | 0.232795 |
| rs7541244      | RASSF5   | 1 | 204827097 | 3 | 0.024008 |
| rs7541445      | RASSF5   | 1 | 204827309 | 6 | 0.402795 |
| rs7541445      | RASSF5   | 1 | 204827309 | 7 | 0.059745 |
| rs7541445      | RASSF5   | 1 | 204827309 | 1 | 0.643442 |
| rs7541445      | RASSF5   | 1 | 204827309 | 2 | 2.230795 |
| rs7541445      | RASSF5   | 1 | 204827309 | 4 | 5.755839 |
| rs34526867     | MAPKAPK2 | 1 | 204971663 | 3 | 0.178931 |
| rs3024496      | IL10     | 1 | 205008487 | 4 | 4.14478  |
| rs2243158      | IL19     | 1 | 205074264 | 3 | 0.041006 |
| rs2243191      | IL19     | 1 | 205082580 | 4 | 0.801278 |
| rs2243191      | IL19     | 1 | 205082580 | 3 | 0.997594 |
| rs2243191      | IL19     | 1 | 205082580 | 7 | 1.347808 |
| rs2243193      | IL19     | 1 | 205082848 | 4 | 0.394568 |
| rs1150258      | IL24     | 1 | 205141528 | 3 | 0.982087 |
| rs1150258      | IL24     | 1 | 205141528 | 2 | 2.723635 |
| rs13190        | PIGR     | 1 | 205168916 | 3 | 0.247293 |
| rs13190        | PIGR     | 1 | 205168916 | 2 | 3.255713 |
| rs13190        | PIGR     | 1 | 205168916 | 7 | 0.109302 |
| rs6667268      | PFKFB2   | 1 | 205312627 | 2 | 1.802475 |
| rs6667268      | PFKFB2   | 1 | 205312627 | 8 | 1.049991 |
| rs6667268      | PFKFB2   | 1 | 205312627 | 7 | 0.448594 |
| rs6667268      | PFKFB2   | 1 | 205312627 | 3 | 0.558954 |
| rs6667268      | PFKFB2   | 1 | 205312627 | 1 | 0.686472 |
| rs8942         | C4BPB    | 1 | 205336542 | 8 | 1.672068 |

|                |           |   |           |   |          |
|----------------|-----------|---|-----------|---|----------|
| rs8942         | C4BPB     | 1 | 205336542 | 5 | 0.99133  |
| rs8942         | C4BPB     | 1 | 205336542 | 4 | 0.222821 |
| rs1126618      | C4BPA     | 1 | 205364303 | 5 | 3.492415 |
| SNP1-205366693 | C4BPA     | 1 | 205366693 | 2 | 4.422845 |
| SNP1-205708573 | CR2       | 1 | 205708573 | 1 | 4.73944  |
| rs1048971      | CR2       | 1 | 205712945 | 7 | 0.916055 |
| rs1048971      | CR2       | 1 | 205712945 | 3 | 0.020317 |
| rs1048971      | CR2       | 1 | 205712945 | 1 | 0.368571 |
| rs1048971      | CR2       | 1 | 205712945 | 4 | 0.596136 |
| rs1048971      | CR2       | 1 | 205712945 | 6 | 1.708451 |
| rs1048971      | CR2       | 1 | 205712945 | 2 | 2.581182 |
| rs17615        | CR2       | 1 | 205713085 | 4 | 3.485538 |
| rs17615        | CR2       | 1 | 205713085 | 1 | 2.102092 |
| rs17616        | CR2       | 1 | 205713546 | 4 | 1.666244 |
| rs17616        | CR2       | 1 | 205713546 | 1 | 2.971358 |
| rs17258982     | CR2       | 1 | 205719987 | 7 | 0.799919 |
| rs17258982     | CR2       | 1 | 205719987 | 2 | 3.946852 |
| rs17258982     | CR2       | 1 | 205719987 | 1 | 0.967604 |
| rs761277       | LOC148696 | 1 | 206059634 | 5 | 0.33082  |
| rs761277       | LOC148696 | 1 | 206059634 | 3 | 0.160245 |
| rs761277       | LOC148696 | 1 | 206059634 | 7 | 2.153431 |
| rs7572         | CD34      | 1 | 206126632 | 2 | 0.146684 |
| rs7572         | CD34      | 1 | 206126632 | 8 | 1.148615 |
| rs1664227      | PLXNA2    | 1 | 206456709 | 6 | 9.543665 |
| rs1664227      | PLXNA2    | 1 | 206456709 | 7 | 5.596009 |
| rs1664227      | PLXNA2    | 1 | 206456709 | 1 | 0.47567  |
| rs1664227      | PLXNA2    | 1 | 206456709 | 2 | 1.098374 |
| rs4844658      | PLXNA2    | 1 | 206456785 | 5 | 0.730158 |
| rs4844658      | PLXNA2    | 1 | 206456785 | 6 | 6.787664 |
| SNP1-206457721 | PLXNA2    | 1 | 206457721 | 4 | 0.479717 |
| rs2800919      | LOC391158 | 1 | 207472376 | 8 | 3.790069 |
| rs2800919      | LOC391158 | 1 | 207472376 | 5 | 4.286253 |
| rs2800919      | LOC391158 | 1 | 207472376 | 2 | 5.268346 |
| rs11119315     | CAMK1G    | 1 | 207851829 | 1 | 3.554973 |
| rs11119315     | CAMK1G    | 1 | 207851829 | 5 | 1.164214 |
| rs2206107      | CAMK1G    | 1 | 207853506 | 5 | 0.981412 |
| rs2206107      | CAMK1G    | 1 | 207853506 | 1 | 5.404893 |
| rs2206107      | CAMK1G    | 1 | 207853506 | 3 | 1.478353 |
| rs2206107      | CAMK1G    | 1 | 207853506 | 6 | 0.500295 |
| rs2206107      | CAMK1G    | 1 | 207853506 | 7 | 1.116304 |
| rs2206107      | CAMK1G    | 1 | 207853506 | 4 | 1.559695 |
| GA019902       | GOS2      | 1 | 207915625 | 1 | 4.782899 |
| GA019902       | GOS2      | 1 | 207915625 | 5 | 1.601459 |
| GA019902       | GOS2      | 1 | 207915625 | 8 | 5.145811 |
| rs2272867      | TRAF3IP3  | 1 | 207996202 | 6 | 0.912766 |
| rs2272867      | TRAF3IP3  | 1 | 207996202 | 5 | 0.133844 |
| rs2272868      | TRAF3IP3  | 1 | 207996226 | 4 | 0.419613 |

|            |          |   |           |   |          |
|------------|----------|---|-----------|---|----------|
| rs17015169 | TRAF3IP3 | 1 | 208003537 | 8 | 0.712974 |
| rs669694   | TRAF3IP3 | 1 | 208017383 | 1 | 0.271918 |
| rs669694   | TRAF3IP3 | 1 | 208017383 | 6 | 0.331541 |
| rs861019   | IRF6     | 1 | 208042009 | 2 | 3.061123 |
| rs861019   | IRF6     | 1 | 208042009 | 7 | 0.641752 |
| rs7539638  | C1orf107 | 1 | 208092374 | 6 | 0.738736 |
| rs7539638  | C1orf107 | 1 | 208092374 | 8 | 3.818365 |
| rs6689839  | C1orf107 | 1 | 208093649 | 2 | 0.704508 |
| rs6689839  | C1orf107 | 1 | 208093649 | 1 | 0.691597 |
| rs6689839  | C1orf107 | 1 | 208093649 | 8 | 0.506534 |
| rs1319072  | C1orf107 | 1 | 208094277 | 8 | 0.061816 |
| rs17188183 | SYT14    | 1 | 208400704 | 5 | 0.211853 |
| rs17188183 | SYT14    | 1 | 208400704 | 1 | 0.544787 |
| rs4609425  | SYT14    | 1 | 208401689 | 3 | 0.534326 |
| rs4609425  | SYT14    | 1 | 208401689 | 1 | 0.887842 |
| rs2066721  | HHAT     | 1 | 208644496 | 7 | 0.72092  |
| rs2066721  | HHAT     | 1 | 208644496 | 4 | 1.258911 |
| rs2066721  | HHAT     | 1 | 208644496 | 5 | 0.020291 |
| rs7522025  | HHAT     | 1 | 208915642 | 2 | 0.130168 |
| rs3135473  | KCNH1    | 1 | 208923208 | 5 | 0.298225 |
| rs3135473  | KCNH1    | 1 | 208923208 | 7 | 0.15656  |
| rs3135473  | KCNH1    | 1 | 208923208 | 8 | 0.510282 |
| rs1135317  | KCNH1    | 1 | 208924080 | 8 | 0.673514 |
| rs1135317  | KCNH1    | 1 | 208924080 | 5 | 0.466696 |
| rs1135317  | KCNH1    | 1 | 208924080 | 2 | 4.33579  |
| rs1533219  | RCOR3    | 1 | 209554699 | 6 | 0.421611 |
| rs1046690  | TRAF5    | 1 | 209613124 | 3 | 0.395163 |
| rs1046690  | TRAF5    | 1 | 209613124 | 8 | 1.889179 |
| rs11119746 | RD3      | 1 | 209717658 | 7 | 1.02625  |
| rs11119748 | RD3      | 1 | 209718808 | 1 | 0.437245 |
| rs41275374 | INTS7    | 1 | 210186668 | 6 | 8.869601 |
| rs3767861  | C1orf75  | 1 | 210604176 | 4 | 0.026425 |
| rs3767861  | C1orf75  | 1 | 210604176 | 1 | 5.295175 |
| rs3767861  | C1orf75  | 1 | 210604176 | 5 | 0.088683 |
| rs3767862  | C1orf75  | 1 | 210604325 | 1 | 6.031349 |
| rs3767862  | C1orf75  | 1 | 210604325 | 5 | 1.970386 |
| rs3767862  | C1orf75  | 1 | 210604325 | 4 | 1.643442 |
| rs518793   | C1orf75  | 1 | 210654829 | 5 | 1.083071 |
| rs1126526  | ATF3     | 1 | 210860128 | 4 | 6.045181 |
| rs1126526  | ATF3     | 1 | 210860128 | 3 | 0.058845 |
| rs3122712  | FAM71A   | 1 | 210865600 | 3 | 0.930758 |
| rs3122713  | FAM71A   | 1 | 210866493 | 6 | 0.519408 |
| rs3795842  | FAM71A   | 1 | 210866572 | 3 | 0.186331 |
| GA019916   | NSL1     | 1 | 211031718 | 7 | 1.273091 |
| rs1133462  | TATDN3   | 1 | 211056514 | 8 | 4.485757 |
| rs1133462  | TATDN3   | 1 | 211056514 | 5 | 0.088622 |
| rs1133462  | TATDN3   | 1 | 211056514 | 1 | 0.40004  |

|                |           |   |           |   |          |
|----------------|-----------|---|-----------|---|----------|
| SNP1-211253154 | ANGEL2    | 1 | 211253154 | 6 | 0.618555 |
| rs2070065      | CENPF     | 1 | 212877867 | 4 | 0.664605 |
| rs3795522      | CENPF     | 1 | 212880748 | 4 | 5.539229 |
| rs3795520      | CENPF     | 1 | 212881205 | 4 | 6.856934 |
| SNP1-212884838 | CENPF     | 1 | 212884838 | 4 | 6.971462 |
| SNP1-212886603 | CENPF     | 1 | 212886603 | 4 | 0.896816 |
| rs869378       | LOC391162 | 1 | 213111577 | 1 | 0.73312  |
| rs6657250      | USH2A     | 1 | 214286404 | 7 | 0.622983 |
| rs10779261     | USH2A     | 1 | 214661929 | 1 | 2.111712 |
| rs1048126      | GPATCH2   | 1 | 215670470 | 6 | 0.136412 |
| rs1048126      | GPATCH2   | 1 | 215670470 | 7 | 0.304421 |
| rs265140       | GPATCH2   | 1 | 215670507 | 1 | 5.552384 |
| rs6604561      | SPATA17   | 1 | 216014361 | 4 | 5.561898 |
| rs6604561      | SPATA17   | 1 | 216014361 | 1 | 7.060128 |
| rs11466412     | TGFB2     | 1 | 216681366 | 6 | 0.032157 |
| rs900          | TGFB2     | 1 | 216681528 | 7 | 5.088206 |
| rs17517067     | LOC643717 | 1 | 217155201 | 7 | 5.957699 |
| rs3762307      | LOC728510 | 1 | 217675199 | 3 | 0.805299 |
| rs3762307      | LOC728510 | 1 | 217675199 | 4 | 0.323543 |
| SNP1-218223327 | EPRS      | 1 | 218223327 | 5 | 9.147069 |
| rs12136801     | BPNT1     | 1 | 218329682 | 5 | 0.874349 |
| rs12045447     | RAB3GAP2  | 1 | 218411076 | 8 | 1.28912  |
| rs12045447     | RAB3GAP2  | 1 | 218411076 | 7 | 0.465154 |
| rs7540014      | LOC643779 | 1 | 218557120 | 6 | 2.309227 |
| rs7540014      | LOC643779 | 1 | 218557120 | 7 | 4.594058 |
| rs7540014      | LOC643779 | 1 | 218557120 | 1 | 3.623683 |
| rs35322308     | MARK1     | 1 | 218871074 | 4 | 0.535661 |
| rs2738755      | HLX       | 1 | 219124269 | 4 | 0.462875 |
| rs2738755      | HLX       | 1 | 219124269 | 3 | 1.350846 |
| SNP1-220780244 | HHIPL2    | 1 | 220780244 | 7 | 1.848531 |
| SNP1-220780244 | HHIPL2    | 1 | 220780244 | 6 | 3.815356 |
| rs3008651      | TAF1A     | 1 | 220829858 | 2 | 2.429048 |
| rs3008651      | TAF1A     | 1 | 220829858 | 6 | 0.986536 |
| rs3008651      | TAF1A     | 1 | 220829858 | 7 | 0.141884 |
| SNP1-220869685 | MIA3      | 1 | 220869685 | 7 | 0.125583 |
| rs3811465      | C1orf58   | 1 | 220952742 | 7 | 3.495538 |
| SNP1-220986518 | FLJ43505  | 1 | 220986518 | 7 | 0.179458 |
| rs6683071      | FLJ43505  | 1 | 220989974 | 7 | 0.696146 |
| rs2609383      | DISP1     | 1 | 221183095 | 6 | 5.691516 |
| rs2609383      | DISP1     | 1 | 221183095 | 2 | 5.322134 |
| SNP1-221245101 | DISP1     | 1 | 221245101 | 3 | 0.165784 |
| SNP1-221245101 | DISP1     | 1 | 221245101 | 8 | 1.049905 |
| SNP1-221245101 | DISP1     | 1 | 221245101 | 2 | 3.169456 |
| rs6679661      | C1orf65   | 1 | 221633890 | 4 | 0.493792 |
| rs6682552      | C1orf65   | 1 | 221634431 | 4 | 0.729181 |
| rs17739        | TP53BP2   | 1 | 222034576 | 4 | 3.976136 |
| rs6604731      | LOC644220 | 1 | 222118062 | 5 | 1.768382 |



|                |           |   |           |   |          |
|----------------|-----------|---|-----------|---|----------|
| rs6604731      | LOC644220 | 1 | 222118062 | 7 | 1.073073 |
| rs6604731      | LOC644220 | 1 | 222118062 | 3 | 1.31844  |
| rs11585297     | CNIH3     | 1 | 222994591 | 1 | 4.256275 |
| rs11585297     | CNIH3     | 1 | 222994591 | 7 | 1.823873 |
| rs2501107      | DNAH14    | 1 | 223297231 | 6 | 0.904321 |
| rs2501107      | DNAH14    | 1 | 223297231 | 7 | 0.521857 |
| rs3128651      | DNAH14    | 1 | 223334966 | 7 | 0.001906 |
| rs3128651      | DNAH14    | 1 | 223334966 | 6 | 0.454649 |
| rs10495237     | DNAH14    | 1 | 223572917 | 7 | 0.364401 |
| rs10495237     | DNAH14    | 1 | 223572917 | 5 | 0.548361 |
| rs7527925      | DNAH14    | 1 | 223600842 | 4 | 0.391337 |
| rs7527925      | DNAH14    | 1 | 223600842 | 7 | 0.694144 |
| rs7527925      | DNAH14    | 1 | 223600842 | 1 | 1.240398 |
| rs7527925      | DNAH14    | 1 | 223600842 | 8 | 0.680949 |
| rs3856154      | DNAH14    | 1 | 223631638 | 5 | 0.40819  |
| rs3856154      | DNAH14    | 1 | 223631638 | 1 | 4.729195 |
| rs3856154      | DNAH14    | 1 | 223631638 | 7 | 0.410324 |
| rs950210       | DNAH14    | 1 | 223635864 | 7 | 0.265161 |
| rs950210       | DNAH14    | 1 | 223635864 | 1 | 3.761874 |
| rs950210       | DNAH14    | 1 | 223635864 | 8 | 0.420661 |
| rs3738040      | EPHX1     | 1 | 224079664 | 4 | 0.041375 |
| rs3738040      | EPHX1     | 1 | 224079664 | 8 | 1.481249 |
| rs3738040      | EPHX1     | 1 | 224079664 | 6 | 4.286782 |
| SNP1-224101536 | TMEM63A   | 1 | 224101536 | 6 | 1.889194 |
| SNP1-224101536 | TMEM63A   | 1 | 224101536 | 4 | 5.493926 |
| SNP1-224101536 | TMEM63A   | 1 | 224101536 | 5 | 1.653436 |
| SNP1-224101536 | TMEM63A   | 1 | 224101536 | 3 | 0.367295 |
| SNP1-224101536 | TMEM63A   | 1 | 224101536 | 1 | 0.681734 |
| GA019956       | PYCR2     | 1 | 224178568 | 8 | 1.3579   |
| GA019956       | PYCR2     | 1 | 224178568 | 2 | 1.160582 |
| rs6664468      | C1orf55   | 1 | 224238098 | 8 | 7.979565 |
| rs6664468      | C1orf55   | 1 | 224238098 | 7 | 0.402305 |
| rs6664468      | C1orf55   | 1 | 224238098 | 1 | 0.115044 |
| rs6664468      | C1orf55   | 1 | 224238098 | 4 | 0.430315 |
| rs2306120      | ACBD3     | 1 | 224419121 | 1 | 4.61289  |
| rs1136410      | PARP1     | 1 | 224621925 | 3 | 0.721336 |
| rs1136410      | PARP1     | 1 | 224621925 | 8 | 0.372028 |
| rs1136410      | PARP1     | 1 | 224621925 | 6 | 0.51988  |
| rs1805414      | PARP1     | 1 | 224639987 | 6 | 1.038264 |
| rs1805414      | PARP1     | 1 | 224639987 | 1 | 0.21764  |
| rs1805414      | PARP1     | 1 | 224639987 | 2 | 0.842062 |
| rs1805414      | PARP1     | 1 | 224639987 | 7 | 0.648872 |
| rs1805414      | PARP1     | 1 | 224639987 | 3 | 0.971189 |
| rs1144839      | ITPKB     | 1 | 224886875 | 6 | 0.358299 |
| rs1144839      | ITPKB     | 1 | 224886875 | 5 | 0.143388 |
| rs6667260      | ITPKB     | 1 | 224990561 | 5 | 1.254297 |
| rs6667260      | ITPKB     | 1 | 224990561 | 7 | 4.775584 |

|                |          |   |           |   |          |
|----------------|----------|---|-----------|---|----------|
| rs6667260      | ITPKB    | 1 | 224990561 | 8 | 0.025774 |
| rs6667260      | ITPKB    | 1 | 224990561 | 1 | 2.55809  |
| rs1295645      | PSEN2    | 1 | 225125660 | 4 | 2.297801 |
| rs1295645      | PSEN2    | 1 | 225125660 | 5 | 1.503021 |
| rs1295645      | PSEN2    | 1 | 225125660 | 1 | 5.10452  |
| rs3177404      | PSEN2    | 1 | 225129852 | 7 | 0.337353 |
| rs6759         | PSEN2    | 1 | 225136360 | 2 | 3.287735 |
| rs6759         | PSEN2    | 1 | 225136360 | 8 | 0.249999 |
| rs6759         | PSEN2    | 1 | 225136360 | 5 | 0.149304 |
| rs1045247      | CDC42BPA | 1 | 225249198 | 2 | 3.550367 |
| rs1045247      | CDC42BPA | 1 | 225249198 | 1 | 0.48659  |
| rs3088389      | JMJD4    | 1 | 225985813 | 5 | 0.454855 |
| rs3088389      | JMJD4    | 1 | 225985813 | 1 | 0.181587 |
| rs3088389      | JMJD4    | 1 | 225985813 | 2 | 8.567371 |
| rs4837         | JMJD4    | 1 | 225986980 | 7 | 0.385056 |
| SNP1-226021300 | C1orf142 | 1 | 226021300 | 7 | 0.634652 |
| rs8192633      | WNT9A    | 1 | 226176094 | 5 | 0.151972 |
| rs752107       | WNT3A    | 1 | 226313974 | 7 | 2.895308 |
| rs752107       | WNT3A    | 1 | 226313974 | 1 | 2.973849 |
| rs752107       | WNT3A    | 1 | 226313974 | 8 | 2.312636 |
| rs752107       | WNT3A    | 1 | 226313974 | 5 | 3.388105 |
| rs752107       | WNT3A    | 1 | 226313974 | 4 | 3.895936 |
| rs752107       | WNT3A    | 1 | 226313974 | 3 | 2.784352 |
| SNP1-226429305 | C1orf69  | 1 | 226429305 | 3 | 0.402673 |
| SNP1-226429305 | C1orf69  | 1 | 226429305 | 8 | 0.590566 |
| SNP1-226429305 | C1orf69  | 1 | 226429305 | 5 | 0.26627  |
| SNP1-226429305 | C1orf69  | 1 | 226429305 | 7 | 0.637244 |
| SNP1-226429305 | C1orf69  | 1 | 226429305 | 4 | 0.556504 |
| GA001737       | C1orf69  | 1 | 226430373 | 5 | 0.623731 |
| rs4653915      | C1orf69  | 1 | 226431228 | 8 | 1.137303 |
| rs4653915      | C1orf69  | 1 | 226431228 | 7 | 1.568452 |
| rs4653915      | C1orf69  | 1 | 226431228 | 6 | 0.732318 |
| rs4653915      | C1orf69  | 1 | 226431228 | 5 | 1.43139  |
| rs4653915      | C1orf69  | 1 | 226431228 | 3 | 1.514943 |
| rs7532924      | C1orf145 | 1 | 226460552 | 3 | 0.552227 |
| rs7532924      | C1orf145 | 1 | 226460552 | 4 | 1.259611 |
| rs7532924      | C1orf145 | 1 | 226460552 | 7 | 0.121974 |
| rs7532924      | C1orf145 | 1 | 226460552 | 5 | 0.095508 |
| rs1620111      | OBSCN    | 1 | 226468670 | 6 | 0.762041 |
| rs1620111      | OBSCN    | 1 | 226468670 | 5 | 0.714268 |
| rs1620111      | OBSCN    | 1 | 226468670 | 8 | 0.11165  |
| rs1620111      | OBSCN    | 1 | 226468670 | 7 | 1.213945 |
| rs1620111      | OBSCN    | 1 | 226468670 | 3 | 1.106381 |
| rs1771487      | OBSCN    | 1 | 226468744 | 3 | 0.663116 |
| rs1771487      | OBSCN    | 1 | 226468744 | 8 | 0.839128 |
| rs1771487      | OBSCN    | 1 | 226468744 | 7 | 0.481393 |
| rs1771487      | OBSCN    | 1 | 226468744 | 5 | 0.640524 |

|                |        |   |           |   |          |
|----------------|--------|---|-----------|---|----------|
| rs1771487      | OBSCN  | 1 | 226468744 | 4 | 1.877529 |
| rs1771487      | OBSCN  | 1 | 226468744 | 6 | 1.002584 |
| rs1757152      | OBSCN  | 1 | 226478931 | 7 | 0.160373 |
| rs1757152      | OBSCN  | 1 | 226478931 | 4 | 0.161396 |
| rs1757152      | OBSCN  | 1 | 226478931 | 6 | 0.089542 |
| rs1757152      | OBSCN  | 1 | 226478931 | 3 | 0.334797 |
| rs1757152      | OBSCN  | 1 | 226478931 | 5 | 0.51193  |
| rs1771455      | OBSCN  | 1 | 226497718 | 7 | 0.22687  |
| rs1771455      | OBSCN  | 1 | 226497718 | 5 | 0.082762 |
| rs7517088      | OBSCN  | 1 | 226501018 | 5 | 2.146099 |
| rs1188721      | OBSCN  | 1 | 226530871 | 5 | 0.15193  |
| rs1188722      | OBSCN  | 1 | 226530899 | 5 | 0.512882 |
| rs1188722      | OBSCN  | 1 | 226530899 | 7 | 0.273194 |
| SNP1-226530926 | OBSCN  | 1 | 226530926 | 1 | 3.773105 |
| rs4653939      | OBSCN  | 1 | 226561319 | 5 | 0.112151 |
| rs4653939      | OBSCN  | 1 | 226561319 | 6 | 0.37899  |
| rs4653939      | OBSCN  | 1 | 226561319 | 3 | 0.192866 |
| rs4653939      | OBSCN  | 1 | 226561319 | 4 | 0.454156 |
| rs435776       | OBSCN  | 1 | 226561413 | 6 | 1.018084 |
| rs435776       | OBSCN  | 1 | 226561413 | 7 | 1.25305  |
| rs435776       | OBSCN  | 1 | 226561413 | 3 | 0.99926  |
| rs435776       | OBSCN  | 1 | 226561413 | 4 | 1.106213 |
| rs1150912      | OBSCN  | 1 | 226570300 | 5 | 0.697968 |
| rs1150912      | OBSCN  | 1 | 226570300 | 7 | 0.365916 |
| rs4653942      | OBSCN  | 1 | 226571827 | 3 | 0.513207 |
| rs1188729      | OBSCN  | 1 | 226572291 | 5 | 0.015179 |
| rs1188729      | OBSCN  | 1 | 226572291 | 7 | 0.117357 |
| rs373610       | OBSCN  | 1 | 226576050 | 5 | 0.766388 |
| rs373610       | OBSCN  | 1 | 226576050 | 7 | 0.189403 |
| rs1188710      | OBSCN  | 1 | 226595186 | 7 | 0.802389 |
| rs1188710      | OBSCN  | 1 | 226595186 | 6 | 0.385093 |
| rs1188710      | OBSCN  | 1 | 226595186 | 3 | 0.329572 |
| rs1188710      | OBSCN  | 1 | 226595186 | 4 | 0.128844 |
| rs12035900     | OBSCN  | 1 | 226614524 | 5 | 0.451903 |
| rs12035900     | OBSCN  | 1 | 226614524 | 7 | 0.597021 |
| SNP1-226614820 | OBSCN  | 1 | 226614820 | 4 | 2.703115 |
| SNP1-226614820 | OBSCN  | 1 | 226614820 | 3 | 0.284763 |
| rs35155240     | NULL   | 1 | 226617049 | 3 | 0.407169 |
| SNP1-226625515 | OBSCN  | 1 | 226625515 | 3 | 0.61636  |
| rs500049       | NULL   | 1 | 226626617 | 5 | 0.837883 |
| rs500049       | NULL   | 1 | 226626617 | 1 | 0.508878 |
| rs500049       | NULL   | 1 | 226626617 | 4 | 0.712977 |
| SNP1-226631507 | OBSCN  | 1 | 226631507 | 6 | 0.147685 |
| SNP1-226631507 | OBSCN  | 1 | 226631507 | 4 | 0.091704 |
| SNP1-226631507 | OBSCN  | 1 | 226631507 | 3 | 0.272056 |
| rs503203       | TRIM17 | 1 | 226669283 | 3 | 0.224877 |
| rs503203       | TRIM17 | 1 | 226669283 | 6 | 2.330163 |

|            |           |   |           |   |          |
|------------|-----------|---|-----------|---|----------|
| rs503203   | TRIM17    | 1 | 226669283 | 4 | 1.250457 |
| rs12542    | RNF187    | 1 | 226748953 | 3 | 0.025032 |
| rs12542    | RNF187    | 1 | 226748953 | 4 | 1.028256 |
| rs12542    | RNF187    | 1 | 226748953 | 6 | 4.952017 |
| rs11547452 | RNF187    | 1 | 226749158 | 6 | 0.522559 |
| rs11547452 | RNF187    | 1 | 226749158 | 3 | 0.655478 |
| rs13349    | RHOU      | 1 | 226947752 | 8 | 4.437115 |
| rs13349    | RHOU      | 1 | 226947752 | 4 | 3.867425 |
| rs15452    | RAB4A     | 1 | 227506262 | 4 | 0.217254 |
| rs15452    | RAB4A     | 1 | 227506262 | 5 | 0.106182 |
| rs15452    | RAB4A     | 1 | 227506262 | 6 | 1.17083  |
| rs15452    | RAB4A     | 1 | 227506262 | 3 | 0.111289 |
| rs2282081  | C1orf96   | 1 | 227526869 | 3 | 0.140095 |
| rs2282081  | C1orf96   | 1 | 227526869 | 6 | 3.832037 |
| rs3738187  | ABCB10    | 1 | 227749887 | 2 | 3.21949  |
| rs3738187  | ABCB10    | 1 | 227749887 | 4 | 2.513035 |
| rs3738187  | ABCB10    | 1 | 227749887 | 7 | 0.896272 |
| rs3738187  | ABCB10    | 1 | 227749887 | 6 | 0.456629 |
| rs3213494  | GALNT2    | 1 | 228482547 | 8 | 5.130314 |
| rs16851328 | GALNT2    | 1 | 228482753 | 7 | 0.024898 |
| rs16851328 | GALNT2    | 1 | 228482753 | 2 | 3.556279 |
| rs7022     | GALNT2    | 1 | 228484287 | 4 | 0.474228 |
| rs7022     | GALNT2    | 1 | 228484287 | 2 | 0.483583 |
| rs7022     | GALNT2    | 1 | 228484287 | 1 | 0.441549 |
| rs7022     | GALNT2    | 1 | 228484287 | 7 | 6.791845 |
| rs12089782 | PGBD5     | 1 | 228524947 | 1 | 3.116804 |
| rs7079     | AGT       | 1 | 228904954 | 5 | 0.40371  |
| rs7079     | AGT       | 1 | 228904954 | 2 | 2.445037 |
| rs7079     | AGT       | 1 | 228904954 | 7 | 0.811758 |
| rs7079     | AGT       | 1 | 228904954 | 4 | 0.426553 |
| rs4762     | AGT       | 1 | 228912600 | 5 | 0.272038 |
| rs4762     | AGT       | 1 | 228912600 | 1 | 4.201308 |
| rs4762     | AGT       | 1 | 228912600 | 4 | 0.022656 |
| rs7517389  | CAPN9     | 1 | 228976962 | 6 | 2.342012 |
| rs7517389  | CAPN9     | 1 | 228976962 | 7 | 2.404179 |
| rs1933631  | CAPN9     | 1 | 228981352 | 6 | 2.13845  |
| rs1933631  | CAPN9     | 1 | 228981352 | 1 | 5.784144 |
| rs3811502  | TTC13     | 1 | 229109355 | 2 | 7.549852 |
| rs3811502  | TTC13     | 1 | 229109355 | 1 | 0.167779 |
| rs3811502  | TTC13     | 1 | 229109355 | 3 | 0.089529 |
| rs3811502  | TTC13     | 1 | 229109355 | 7 | 0.890422 |
| rs3811502  | TTC13     | 1 | 229109355 | 4 | 0.468157 |
| rs4658912  | LOC644006 | 1 | 229225706 | 4 | 4.757022 |
| rs4658912  | LOC644006 | 1 | 229225706 | 6 | 0.395873 |
| rs4658912  | LOC644006 | 1 | 229225706 | 5 | 4.951311 |
| rs11586657 | TRIM67    | 1 | 229422535 | 1 | 3.514373 |
| rs11586657 | TRIM67    | 1 | 229422535 | 6 | 1.314443 |

|                |           |   |           |   |          |
|----------------|-----------|---|-----------|---|----------|
| rs11586657     | TRIM67    | 1 | 229422535 | 5 | 1.439102 |
| rs2274067      | C1orf131  | 1 | 229443429 | 5 | 0.110485 |
| rs2274067      | C1orf131  | 1 | 229443429 | 3 | 0.53549  |
| rs2274067      | C1orf131  | 1 | 229443429 | 7 | 0.276479 |
| rs574553       | GNPAT     | 1 | 229468525 | 6 | 0.168085 |
| rs574553       | GNPAT     | 1 | 229468525 | 4 | 2.028329 |
| rs7544596      | EGLN1     | 1 | 229625963 | 7 | 0.348868 |
| rs1630250      | LOC440731 | 1 | 229730826 | 3 | 0.304838 |
| rs1630250      | LOC440731 | 1 | 229730826 | 8 | 5.549655 |
| rs1630250      | LOC440731 | 1 | 229730826 | 5 | 0.177804 |
| rs3738401      | DISC1     | 1 | 229896918 | 7 | 0.285468 |
| rs3738401      | DISC1     | 1 | 229896918 | 3 | 1.642959 |
| rs11122324     | DISC1     | 1 | 229925804 | 3 | 0.513212 |
| rs11122324     | DISC1     | 1 | 229925804 | 1 | 0.452301 |
| rs12133766     | DISC1     | 1 | 230020768 | 8 | 0.269412 |
| rs3082         | DISC1     | 1 | 230069015 | 3 | 0.252855 |
| rs9729179      | DISC1     | 1 | 230240796 | 3 | 1.92421  |
| rs980989       | DISC1     | 1 | 230242818 | 3 | 0.327016 |
| rs980989       | DISC1     | 1 | 230242818 | 4 | 0.13637  |
| rs9308481      | DISC1     | 1 | 230242929 | 4 | 3.445688 |
| rs9308481      | DISC1     | 1 | 230242929 | 7 | 0.948454 |
| rs9308481      | DISC1     | 1 | 230242929 | 3 | 0.067959 |
| rs11803088     | DISC1     | 1 | 230243392 | 8 | 0.552111 |
| rs11803088     | DISC1     | 1 | 230243392 | 1 | 0.005015 |
| rs11803088     | DISC1     | 1 | 230243392 | 4 | 0.283315 |
| rs16856322     | DISC1     | 1 | 230243610 | 3 | 0.616573 |
| rs16856322     | DISC1     | 1 | 230243610 | 4 | 1.645055 |
| rs12757779     | SIPA1L2   | 1 | 230648059 | 2 | 0.527293 |
| rs12757779     | SIPA1L2   | 1 | 230648059 | 4 | 0.738347 |
| rs6424243      | LOC729336 | 1 | 230834771 | 1 | 3.386835 |
| rs2814526      | KIAA1383  | 1 | 231008013 | 8 | 4.060109 |
| rs12725558     | C1orf57   | 1 | 231158086 | 6 | 0.586604 |
| rs12725558     | C1orf57   | 1 | 231158086 | 7 | 0.96912  |
| rs12725558     | C1orf57   | 1 | 231158086 | 5 | 0.559772 |
| rs12725558     | C1orf57   | 1 | 231158086 | 3 | 0.608017 |
| SNP1-231200709 | PCNXL2    | 1 | 231200709 | 4 | 5.191113 |
| SNP1-231200709 | PCNXL2    | 1 | 231200709 | 3 | 0.027444 |
| rs3795375      | KIAA1804  | 1 | 231581557 | 8 | 5.044077 |
| rs3795375      | KIAA1804  | 1 | 231581557 | 6 | 5.112105 |
| rs963982       | KIAA1804  | 1 | 231581694 | 6 | 0.628134 |
| SNP1-231581725 | KIAA1804  | 1 | 231581725 | 8 | 4.184236 |
| rs17227790     | LOC728987 | 1 | 231832150 | 7 | 0.745709 |
| rs2991957      | LOC440733 | 1 | 232559638 | 4 | 0.748612 |
| rs2991957      | LOC440733 | 1 | 232559638 | 1 | 0.824734 |
| rs2991957      | LOC440733 | 1 | 232559638 | 2 | 1.342534 |
| rs270502       | TARBP1    | 1 | 232670009 | 1 | 3.748134 |
| rs2789367      | GGPS1     | 1 | 233573541 | 7 | 0.044529 |

|                |           |   |           |   |          |
|----------------|-----------|---|-----------|---|----------|
| rs2789367      | GGPS1     | 1 | 233573541 | 1 | 1.133163 |
| rs2789367      | GGPS1     | 1 | 233573541 | 2 | 0.193044 |
| rs2789367      | GGPS1     | 1 | 233573541 | 3 | 1.129317 |
| rs12756717     | GNG4      | 1 | 233780785 | 3 | 1.600832 |
| rs12756717     | GNG4      | 1 | 233780785 | 1 | 3.967175 |
| rs12756717     | GNG4      | 1 | 233780785 | 7 | 0.488274 |
| rs14326        | GNG4      | 1 | 233782146 | 6 | 0.214894 |
| rs14326        | GNG4      | 1 | 233782146 | 7 | 2.659214 |
| rs14326        | GNG4      | 1 | 233782146 | 3 | 0.493949 |
| rs14326        | GNG4      | 1 | 233782146 | 1 | 4.740964 |
| rs3768066      | LYST      | 1 | 234038386 | 3 | 0.040745 |
| rs3768066      | LYST      | 1 | 234038386 | 8 | 2.046403 |
| rs873          | NID1      | 1 | 234207362 | 3 | 1.65204  |
| rs873          | NID1      | 1 | 234207362 | 2 | 5.327828 |
| rs35714220     | NID1      | 1 | 234243468 | 5 | 2.40608  |
| rs7519217      | LOC343508 | 1 | 234341428 | 4 | 3.401622 |
| rs7519217      | LOC343508 | 1 | 234341428 | 6 | 2.567258 |
| rs7519217      | LOC343508 | 1 | 234341428 | 1 | 4.591986 |
| rs1726630      | ERO1LB    | 1 | 234447972 | 2 | 2.987978 |
| rs1726630      | ERO1LB    | 1 | 234447972 | 8 | 1.382298 |
| rs1726630      | ERO1LB    | 1 | 234447972 | 7 | 0.64569  |
| rs1726630      | ERO1LB    | 1 | 234447972 | 1 | 0.465161 |
| rs1726630      | ERO1LB    | 1 | 234447972 | 5 | 0.714204 |
| rs1726630      | ERO1LB    | 1 | 234447972 | 3 | 0.384499 |
| SNP1-234479853 | ERO1LB    | 1 | 234479853 | 3 | 0.382456 |
| SNP1-234479853 | ERO1LB    | 1 | 234479853 | 7 | 0.600759 |
| SNP1-234479853 | ERO1LB    | 1 | 234479853 | 5 | 3.092649 |
| SNP1-234479853 | ERO1LB    | 1 | 234479853 | 1 | 1.16238  |
| SNP1-234479853 | ERO1LB    | 1 | 234479853 | 6 | 3.857603 |
| SNP1-234479853 | ERO1LB    | 1 | 234479853 | 2 | 1.390116 |
| rs966365       | EDARADD   | 1 | 234624394 | 4 | 0.10001  |
| rs604070       | EDARADD   | 1 | 234712293 | 1 | 0.533459 |
| rs604070       | EDARADD   | 1 | 234712293 | 4 | 0.368409 |
| rs604070       | EDARADD   | 1 | 234712293 | 2 | 0.466775 |
| rs604070       | EDARADD   | 1 | 234712293 | 7 | 6.259381 |
| rs6428955      | EDARADD   | 1 | 234714359 | 5 | 1.408752 |
| rs6428955      | EDARADD   | 1 | 234714359 | 2 | 2.356461 |
| rs6428955      | EDARADD   | 1 | 234714359 | 8 | 4.157726 |
| rs6428955      | EDARADD   | 1 | 234714359 | 4 | 4.236743 |
| rs6428955      | EDARADD   | 1 | 234714359 | 1 | 2.814318 |
| rs2737713      | LGALS8    | 1 | 234767430 | 6 | 0.394159 |
| rs2737713      | LGALS8    | 1 | 234767430 | 7 | 1.024894 |
| rs1041942      | LGALS8    | 1 | 234778574 | 6 | 1.898798 |
| rs1041942      | LGALS8    | 1 | 234778574 | 7 | 7.801859 |
| rs1041942      | LGALS8    | 1 | 234778574 | 8 | 4.401249 |
| rs2275687      | HEATR1    | 1 | 234784549 | 8 | 5.076581 |
| rs2275687      | HEATR1    | 1 | 234784549 | 6 | 0.002643 |

|                |           |   |           |   |          |
|----------------|-----------|---|-----------|---|----------|
| rs2275687      | HEATR1    | 1 | 234784549 | 7 | 4.356494 |
| rs1126627      | HEATR1    | 1 | 234785243 | 8 | 1.17909  |
| rs653737       | HEATR1    | 1 | 234796579 | 8 | 2.922439 |
| rs653737       | HEATR1    | 1 | 234796579 | 7 | 1.129189 |
| rs653737       | HEATR1    | 1 | 234796579 | 1 | 3.927038 |
| rs653737       | HEATR1    | 1 | 234796579 | 6 | 4.627459 |
| rs2564739      | HEATR1    | 1 | 234822460 | 6 | 3.886223 |
| rs10737812     | MTR       | 1 | 235125451 | 6 | 0.139001 |
| rs10737812     | MTR       | 1 | 235125451 | 2 | 3.239643 |
| rs10737812     | MTR       | 1 | 235125451 | 4 | 0.052104 |
| rs1804742      | MTR       | 1 | 235129251 | 2 | 3.404044 |
| rs1804742      | MTR       | 1 | 235129251 | 6 | 2.406698 |
| rs1804742      | MTR       | 1 | 235129251 | 1 | 0.169613 |
| SNP1-235131031 | MTR       | 1 | 235131031 | 8 | 0.172504 |
| rs34967813     | RYR2      | 1 | 235908013 | 1 | 0.323    |
| rs1054888      | LOC339535 | 1 | 236710723 | 7 | 1.341147 |
| rs1054888      | LOC339535 | 1 | 236710723 | 5 | 1.250856 |
| rs1054888      | LOC339535 | 1 | 236710723 | 8 | 4.827388 |
| rs882869       | FMN2      | 1 | 238704194 | 1 | 1.976035 |
| rs2185289      | LOC645916 | 1 | 238866705 | 7 | 4.772001 |
| rs2185288      | LOC645916 | 1 | 238866739 | 1 | 2.461507 |
| rs2185288      | LOC645916 | 1 | 238866739 | 7 | 1.947292 |
| rs1053230      | KMO       | 1 | 239821971 | 3 | 1.055933 |
| rs3193688      | KMO       | 1 | 239825189 | 6 | 0.233436 |
| rs3193688      | KMO       | 1 | 239825189 | 1 | 6.157715 |
| rs1053183      | KMO       | 1 | 239825254 | 1 | 5.102983 |
| rs1053183      | KMO       | 1 | 239825254 | 6 | 7.127227 |
| rs676750       | CHML      | 1 | 239862907 | 3 | 0.189419 |
| rs676750       | CHML      | 1 | 239862907 | 5 | 0.398599 |
| rs676750       | CHML      | 1 | 239862907 | 2 | 4.704665 |
| rs10802990     | WDR64     | 1 | 239974440 | 3 | 0.499631 |
| rs10802990     | WDR64     | 1 | 239974440 | 5 | 0.075177 |
| rs1635517      | EXO1      | 1 | 240078656 | 3 | 1.626907 |
| rs1635517      | EXO1      | 1 | 240078656 | 7 | 1.900539 |
| rs735943       | EXO1      | 1 | 240096774 | 3 | 0.248554 |
| rs4149963      | EXO1      | 1 | 240102005 | 1 | 5.169954 |
| rs3851304      | LOC441925 | 1 | 240188419 | 5 | 0.494371 |
| rs34091549     | LOC391183 | 1 | 241002620 | 3 | 2.266265 |
| rs976529       | SDCCAG8   | 1 | 241538085 | 8 | 0.104937 |
| rs2994330      | LOC729199 | 1 | 241713831 | 2 | 1.472763 |
| rs2994330      | LOC729199 | 1 | 241713831 | 8 | 0.089413 |
| rs2994330      | LOC729199 | 1 | 241713831 | 1 | 1.115233 |
| rs3006922      | LOC729199 | 1 | 241713977 | 2 | 1.721571 |
| rs2994329      | LOC729199 | 1 | 241714544 | 8 | 0.834705 |
| rs11586356     | C1orf101  | 1 | 242707839 | 2 | 5.208728 |
| rs7544794      | C1orf101  | 1 | 242790715 | 4 | 0.855024 |
| rs10927267     | C1orf101  | 1 | 242802481 | 4 | 0.000846 |

|                |           |   |           |   |          |
|----------------|-----------|---|-----------|---|----------|
| rs11579106     | FAM36A    | 1 | 243074738 | 3 | 0.099224 |
| rs10927387     | EFCAB2    | 1 | 243312025 | 1 | 4.990622 |
| rs10927387     | EFCAB2    | 1 | 243312025 | 3 | 0.543484 |
| rs10927387     | EFCAB2    | 1 | 243312025 | 5 | 5.202821 |
| rs1047707      | EFCAB2    | 1 | 243317643 | 1 | 4.128197 |
| rs1047707      | EFCAB2    | 1 | 243317643 | 5 | 0.535621 |
| rs1047707      | EFCAB2    | 1 | 243317643 | 3 | 0.92507  |
| rs4379666      | LOC729761 | 1 | 243384058 | 7 | 0.107033 |
| rs871840       | KIF26B    | 1 | 243916718 | 3 | 0.041871 |
| rs3737918      | KIF26B    | 1 | 243933134 | 6 | 0.970588 |
| rs8025         | SMYD3     | 1 | 243979463 | 1 | 2.97634  |
| rs8025         | SMYD3     | 1 | 243979463 | 8 | 0.325468 |
| rs7527781      | SMYD3     | 1 | 244647306 | 8 | 0.499446 |
| rs7527781      | SMYD3     | 1 | 244647306 | 6 | 0.659348 |
| rs7527781      | SMYD3     | 1 | 244647306 | 1 | 4.36076  |
| rs7527781      | SMYD3     | 1 | 244647306 | 5 | 0.184838 |
| rs7527781      | SMYD3     | 1 | 244647306 | 7 | 6.148957 |
| rs6693807      | LOC343165 | 1 | 245460278 | 1 | 0.766129 |
| rs6693807      | LOC343165 | 1 | 245460278 | 7 | 0.072532 |
| rs10754558     | NLRP3     | 1 | 245678659 | 8 | 0.587319 |
| rs10754558     | NLRP3     | 1 | 245678659 | 1 | 1.913273 |
| rs4925663      | OR2B11    | 1 | 245681240 | 1 | 2.398256 |
| rs1151687      | OR2G2     | 1 | 245818642 | 4 | 0.195961 |
| rs1151687      | OR2G2     | 1 | 245818642 | 3 | 2.096185 |
| rs1151687      | OR2G2     | 1 | 245818642 | 7 | 1.485549 |
| rs1151687      | OR2G2     | 1 | 245818642 | 5 | 1.867031 |
| rs28446289     | OR13G1    | 1 | 245902297 | 3 | 0.088886 |
| rs28446289     | OR13G1    | 1 | 245902297 | 4 | 2.214521 |
| rs28446289     | OR13G1    | 1 | 245902297 | 5 | 0.588102 |
| rs28446289     | OR13G1    | 1 | 245902297 | 1 | 0.40309  |
| rs1151640      | OR13G1    | 1 | 245902573 | 1 | 2.583707 |
| rs1151640      | OR13G1    | 1 | 245902573 | 3 | 1.05218  |
| rs1151640      | OR13G1    | 1 | 245902573 | 7 | 1.245429 |
| rs2282316      | OR6F1     | 1 | 245942038 | 7 | 0.25039  |
| rs1552812      | OR1C1     | 1 | 245987723 | 7 | 0.518774 |
| rs1552812      | OR1C1     | 1 | 245987723 | 4 | 2.515903 |
| rs4925724      | LOC646510 | 1 | 246058232 | 3 | 1.42017  |
| rs4925724      | LOC646510 | 1 | 246058232 | 5 | 0.102617 |
| rs3737277      | TRIM58    | 1 | 246090589 | 7 | 2.788467 |
| rs946696       | TRIM58    | 1 | 246094842 | 5 | 0.600807 |
| rs946696       | TRIM58    | 1 | 246094842 | 7 | 0.954206 |
| SNP1-246105917 | TRIM58    | 1 | 246105917 | 7 | 0.9982   |
| rs4925753      | TRIM58    | 1 | 246106727 | 7 | 1.74898  |
| rs4925753      | TRIM58    | 1 | 246106727 | 5 | 1.381574 |
| rs10888267     | OR2W3     | 1 | 246126046 | 8 | 0.596508 |
| rs10888267     | OR2W3     | 1 | 246126046 | 5 | 0.326807 |
| rs12135078     | OR2W3     | 1 | 246126079 | 3 | 1.597369 |



|              |           |   |           |   |          |
|--------------|-----------|---|-----------|---|----------|
| rs12139390   | OR2W3     | 1 | 246126099 | 3 | 0.162066 |
| rs12139390   | OR2W3     | 1 | 246126099 | 7 | 0.088959 |
| rs11204546   | OR2W3     | 1 | 246126335 | 3 | 0.287296 |
| rs11204546   | OR2W3     | 1 | 246126335 | 5 | 0.853814 |
| rs11204546   | OR2W3     | 1 | 246126335 | 4 | 2.248841 |
| rs6664332    | OR2AK2    | 1 | 246195552 | 4 | 1.210346 |
| rs6664332    | OR2AK2    | 1 | 246195552 | 8 | 1.167462 |
| rs6664332    | OR2AK2    | 1 | 246195552 | 5 | 2.665945 |
| rs954474     | OR2T6     | 1 | 246618183 | 5 | 1.344354 |
| rs954475     | OR2T6     | 1 | 246618259 | 5 | 0.817971 |
| rs954475     | OR2T6     | 1 | 246618259 | 3 | 0.933668 |
| rs4509608    | OR5BU1    | 1 | 246912081 | 2 | 1.662527 |
| rs4509608    | OR5BU1    | 1 | 246912081 | 1 | 1.779412 |
| rs1155324    | ZNF672    | 1 | 247108077 | 4 | 3.40162  |
| SNP2-267003  | ACP1      | 2 | 267003    | 4 | 0.306762 |
| SNP2-267003  | ACP1      | 2 | 267003    | 3 | 0.251579 |
| SNP2-267003  | ACP1      | 2 | 267003    | 1 | 3.780682 |
| SNP2-267003  | ACP1      | 2 | 267003    | 7 | 0.452863 |
| rs4927635    | NULL      | 2 | 1299150   | 1 | 0.935075 |
| rs17415659   | TPO       | 2 | 1476810   | 7 | 2.135822 |
| rs17415659   | TPO       | 2 | 1476810   | 8 | 2.210631 |
| rs17415659   | TPO       | 2 | 1476810   | 5 | 1.441145 |
| rs732608     | TPO       | 2 | 1478906   | 4 | 0.04658  |
| rs732608     | TPO       | 2 | 1478906   | 2 | 0.436492 |
| rs732608     | TPO       | 2 | 1478906   | 7 | 2.749564 |
| rs732608     | TPO       | 2 | 1478906   | 5 | 0.425607 |
| rs732608     | TPO       | 2 | 1478906   | 6 | 0.613888 |
| rs1042589    | TPO       | 2 | 1525334   | 6 | 3.066066 |
| rs1042589    | TPO       | 2 | 1525334   | 3 | 0.643379 |
| rs6739414    | LOC648230 | 2 | 2633087   | 1 | 0.10974  |
| rs6836       | TSSC1     | 2 | 3171805   | 1 | 3.781731 |
| rs6836       | TSSC1     | 2 | 3171805   | 8 | 7.153139 |
| rs10865541   | TTC15     | 2 | 3371082   | 6 | 2.835092 |
| rs10865541   | TTC15     | 2 | 3371082   | 8 | 6.722916 |
| SNP2-3371302 | TTC15     | 2 | 3371302   | 4 | 5.503266 |
| SNP2-3371302 | TTC15     | 2 | 3371302   | 3 | 0.159369 |
| SNP2-3371302 | TTC15     | 2 | 3371302   | 2 | 0.208104 |
| SNP2-3371302 | TTC15     | 2 | 3371302   | 1 | 0.206723 |
| SNP2-3371302 | TTC15     | 2 | 3371302   | 6 | 0.683756 |
| rs4971514    | TTC15     | 2 | 3448470   | 1 | 4.671219 |
| rs4971514    | TTC15     | 2 | 3448470   | 4 | 0.691444 |
| rs4971514    | TTC15     | 2 | 3448470   | 6 | 0.814538 |
| rs4971514    | TTC15     | 2 | 3448470   | 3 | 0.657531 |
| rs11127430   | LOC388923 | 2 | 3464249   | 1 | 4.528462 |
| rs11127430   | LOC388923 | 2 | 3464249   | 3 | 0.860161 |
| rs11127430   | LOC388923 | 2 | 3464249   | 6 | 0.188904 |
| rs11127430   | LOC388923 | 2 | 3464249   | 4 | 8.918442 |

|            |           |   |         |   |          |
|------------|-----------|---|---------|---|----------|
| rs1129241  | LOC643517 | 2 | 3557460 | 1 | 1.517602 |
| rs1129241  | LOC643517 | 2 | 3557460 | 4 | 1.31621  |
| rs10186193 | RNASEH1   | 2 | 3575849 | 1 | 1.337928 |
| rs10186193 | RNASEH1   | 2 | 3575849 | 3 | 0.653476 |
| rs7567833  | COLEC11   | 2 | 3669423 | 8 | 0.548035 |
| rs28381982 | ALLC      | 2 | 3727031 | 8 | 1.681455 |
| rs28381982 | ALLC      | 2 | 3727031 | 4 | 1.562101 |
| rs4371338  | SOX11     | 2 | 5755481 | 1 | 0.964255 |
| rs4371338  | SOX11     | 2 | 5755481 | 7 | 1.289557 |
| rs4371338  | SOX11     | 2 | 5755481 | 8 | 2.083229 |
| rs4371338  | SOX11     | 2 | 5755481 | 4 | 2.384256 |
| rs13419910 | SOX11     | 2 | 5757137 | 4 | 1.247365 |
| rs13419910 | SOX11     | 2 | 5757137 | 7 | 0.630297 |
| rs13419910 | SOX11     | 2 | 5757137 | 8 | 0.399845 |
| rs6729137  | SOX11     | 2 | 5757912 | 4 | 0.203083 |
| rs2709437  | FLJ41046  | 2 | 6040943 | 6 | 1.177686 |
| rs1870744  | FLJ42418  | 2 | 6789300 | 5 | 1.7192   |
| rs4669114  | RSAD2     | 2 | 6954072 | 5 | 0.782308 |
| rs4669114  | RSAD2     | 2 | 6954072 | 1 | 1.011137 |
| rs7570384  | RSAD2     | 2 | 6954129 | 7 | 0.968686 |
| rs10495546 | RSAD2     | 2 | 6954207 | 1 | 1.425314 |
| rs6431837  | RSAD2     | 2 | 6954262 | 7 | 0.853011 |
| rs1045239  | RSAD2     | 2 | 6954625 | 7 | 0.200146 |
| rs1045239  | RSAD2     | 2 | 6954625 | 4 | 1.900168 |
| rs1045239  | RSAD2     | 2 | 6954625 | 5 | 0.479771 |
| rs1045239  | RSAD2     | 2 | 6954625 | 1 | 3.225234 |
| rs364891   | RNF144A   | 2 | 7054518 | 2 | 1.855913 |
| rs309304   | RNF144A   | 2 | 7098937 | 2 | 2.114615 |
| rs309304   | RNF144A   | 2 | 7098937 | 1 | 0.326736 |
| rs309304   | RNF144A   | 2 | 7098937 | 6 | 0.156801 |
| rs309304   | RNF144A   | 2 | 7098937 | 5 | 0.559839 |
| rs309303   | RNF144A   | 2 | 7099011 | 7 | 2.29079  |
| rs309303   | RNF144A   | 2 | 7099011 | 5 | 2.528977 |
| rs309303   | RNF144A   | 2 | 7099011 | 2 | 5.189714 |
| rs309303   | RNF144A   | 2 | 7099011 | 6 | 1.740577 |
| rs11888409 | DDEF2     | 2 | 9438325 | 7 | 0.416089 |
| rs2715860  | DDEF2     | 2 | 9445987 | 5 | 0.253981 |
| rs2715860  | DDEF2     | 2 | 9445987 | 2 | 3.721238 |
| rs2715860  | DDEF2     | 2 | 9445987 | 7 | 0.788494 |
| rs2715860  | DDEF2     | 2 | 9445987 | 1 | 0.060885 |
| rs6728908  | DDEF2     | 2 | 9451225 | 7 | 1.157306 |
| rs1048610  | ADAM17    | 2 | 9552307 | 3 | 0.195274 |
| rs1048610  | ADAM17    | 2 | 9552307 | 8 | 6.460888 |
| rs1048610  | ADAM17    | 2 | 9552307 | 6 | 6.423098 |
| rs12692386 | ADAM17    | 2 | 9613357 | 2 | 1.106532 |
| rs12692386 | ADAM17    | 2 | 9613357 | 6 | 0.5347   |
| rs12692386 | ADAM17    | 2 | 9613357 | 3 | 1.839275 |

|               |           |   |          |   |          |
|---------------|-----------|---|----------|---|----------|
| SNP2-9968411  | TAF1B     | 2 | 9968411  | 3 | 0.749605 |
| SNP2-9968411  | TAF1B     | 2 | 9968411  | 7 | 0.108012 |
| SNP2-9968411  | TAF1B     | 2 | 9968411  | 8 | 5.433659 |
| SNP2-9968411  | TAF1B     | 2 | 9968411  | 6 | 0.189127 |
| rs1469541     | UNQ5830   | 2 | 10062799 | 1 | 3.135826 |
| rs1469541     | UNQ5830   | 2 | 10062799 | 5 | 0.457505 |
| rs4444493     | KLF11     | 2 | 10110629 | 1 | 5.357219 |
| rs4444493     | KLF11     | 2 | 10110629 | 4 | 0.009273 |
| SNP2-10268050 | C2orf48   | 2 | 10268050 | 6 | 0.30645  |
| rs7577583     | C2orf48   | 2 | 10269303 | 4 | 2.067317 |
| rs7577583     | C2orf48   | 2 | 10269303 | 7 | 0.497029 |
| rs7577583     | C2orf48   | 2 | 10269303 | 5 | 1.048586 |
| rs7577583     | C2orf48   | 2 | 10269303 | 2 | 1.142022 |
| rs7577583     | C2orf48   | 2 | 10269303 | 8 | 0.999317 |
| rs13023336    | HPCAL1    | 2 | 10361482 | 4 | 1.426609 |
| rs13023336    | HPCAL1    | 2 | 10361482 | 8 | 3.025214 |
| rs3732114     | NOL10     | 2 | 10629729 | 1 | 5.220159 |
| rs3732114     | NOL10     | 2 | 10629729 | 7 | 0.088341 |
| rs1060011     | PDIA6     | 2 | 10841117 | 6 | 7.589574 |
| rs3732105     | KCNF1     | 2 | 10971191 | 3 | 0.535852 |
| rs3732105     | KCNF1     | 2 | 10971191 | 8 | 0.983833 |
| rs7560331     | FLJ33534  | 2 | 11182281 | 6 | 1.764275 |
| rs7560331     | FLJ33534  | 2 | 11182281 | 5 | 0.37429  |
| rs7560331     | FLJ33534  | 2 | 11182281 | 7 | 1.689304 |
| rs9808232     | ROCK2     | 2 | 11276571 | 2 | 4.134025 |
| rs9808232     | ROCK2     | 2 | 11276571 | 3 | 1.439378 |
| rs9808232     | ROCK2     | 2 | 11276571 | 4 | 0.556553 |
| SNP2-11624144 | GREB1     | 2 | 11624144 | 7 | 4.554371 |
| rs2304399     | GREB1     | 2 | 11670086 | 7 | 0.309815 |
| rs2304402     | GREB1     | 2 | 11691775 | 3 | 1.207842 |
| rs2304402     | GREB1     | 2 | 11691775 | 1 | 3.292189 |
| rs2304402     | GREB1     | 2 | 11691775 | 5 | 0.940527 |
| rs6710817     | NAG       | 2 | 15290013 | 7 | 0.862293 |
| rs7590340     | NAG       | 2 | 15518892 | 1 | 2.360861 |
| rs7590340     | NAG       | 2 | 15518892 | 7 | 0.147808 |
| rs10153729    | DDX1      | 2 | 15649310 | 8 | 3.895324 |
| rs10153729    | DDX1      | 2 | 15649310 | 2 | 0.822756 |
| rs10153729    | DDX1      | 2 | 15649310 | 1 | 0.301962 |
| rs10153729    | DDX1      | 2 | 15649310 | 5 | 0.265082 |
| rs10153729    | DDX1      | 2 | 15649310 | 4 | 0.712102 |
| rs10153729    | DDX1      | 2 | 15649310 | 3 | 0.681792 |
| rs1976809     | LOC645521 | 2 | 17329493 | 5 | 4.111619 |
| rs1976809     | LOC645521 | 2 | 17329493 | 6 | 4.041765 |
| rs1976809     | LOC645521 | 2 | 17329493 | 7 | 3.971656 |
| rs1976809     | LOC645521 | 2 | 17329493 | 3 | 4.894069 |
| rs1976809     | LOC645521 | 2 | 17329493 | 8 | 3.511016 |
| rs834514      | RAD51AP2  | 2 | 17560054 | 3 | 0.419166 |

|               |             |   |          |   |          |
|---------------|-------------|---|----------|---|----------|
| rs834514      | RAD51AP2    | 2 | 17560054 | 1 | 4.355048 |
| rs834514      | RAD51AP2    | 2 | 17560054 | 4 | 1.757338 |
| rs834514      | RAD51AP2    | 2 | 17560054 | 7 | 0.159448 |
| rs834514      | RAD51AP2    | 2 | 17560054 | 6 | 2.881008 |
| rs834514      | RAD51AP2    | 2 | 17560054 | 8 | 1.814783 |
| rs17314548    | RAD51AP2    | 2 | 17560237 | 6 | 2.360679 |
| rs2710673     | SMC6        | 2 | 17708777 | 3 | 0.652582 |
| rs2710673     | SMC6        | 2 | 17708777 | 5 | 1.546393 |
| rs6531053     | LOC284952   | 2 | 17799261 | 6 | 0.199663 |
| rs6531053     | LOC284952   | 2 | 17799261 | 3 | 0.450357 |
| rs6531053     | LOC284952   | 2 | 17799261 | 4 | 0.07786  |
| rs6531053     | LOC284952   | 2 | 17799261 | 1 | 3.803036 |
| rs1812152     | GEN1        | 2 | 17806256 | 7 | 0.349631 |
| rs1812152     | GEN1        | 2 | 17806256 | 3 | 0.217115 |
| SNP2-17826604 | GEN1        | 2 | 17826604 | 3 | 0.309677 |
| rs3747660     | NT5C1B      | 2 | 18608239 | 7 | 0.002064 |
| SNP2-18629637 | NT5C1B      | 2 | 18629637 | 7 | 0.423733 |
| rs2304589     | TTC32       | 2 | 19964968 | 7 | 0.853512 |
| rs2304588     | TTC32       | 2 | 19965198 | 7 | 0.472747 |
| rs1056233     | WDR35       | 2 | 19976569 | 7 | 1.008373 |
| rs1056233     | WDR35       | 2 | 19976569 | 3 | 0.61195  |
| rs1056233     | WDR35       | 2 | 19976569 | 1 | 5.04082  |
| rs1056233     | WDR35       | 2 | 19976569 | 4 | 1.238949 |
| rs6748924     | WDR35       | 2 | 19976702 | 8 | 3.859946 |
| rs1060742     | WDR35       | 2 | 20052496 | 7 | 1.038908 |
| rs28452699    | MATN3       | 2 | 20066410 | 1 | 3.44097  |
| rs28452699    | MATN3       | 2 | 20066410 | 4 | 1.357833 |
| rs28452699    | MATN3       | 2 | 20066410 | 7 | 0.324678 |
| rs1513830     | LOC727885   | 2 | 20115495 | 6 | 1.136061 |
| rs1513830     | LOC727885   | 2 | 20115495 | 1 | 2.394495 |
| rs1131351     | SDC1        | 2 | 20265861 | 5 | 6.329029 |
| rs1131351     | SDC1        | 2 | 20265861 | 2 | 5.026159 |
| rs1131351     | SDC1        | 2 | 20265861 | 6 | 0.802852 |
| rs1131351     | SDC1        | 2 | 20265861 | 7 | 4.404397 |
| rs2289084     | hCG_1795065 | 2 | 20593078 | 1 | 5.363466 |
| rs3821217     | HS1BP3      | 2 | 20681767 | 6 | 1.170378 |
| rs3821217     | HS1BP3      | 2 | 20681767 | 7 | 5.522013 |
| rs3821217     | HS1BP3      | 2 | 20681767 | 1 | 3.960884 |
| rs3732150     | HS1BP3      | 2 | 20681998 | 5 | 0.192932 |
| rs3732150     | HS1BP3      | 2 | 20681998 | 1 | 2.500485 |
| rs3732150     | HS1BP3      | 2 | 20681998 | 8 | 0.107818 |
| rs3732150     | HS1BP3      | 2 | 20681998 | 3 | 0.966917 |
| rs3732149     | HS1BP3      | 2 | 20682245 | 7 | 0.072971 |
| rs3732149     | HS1BP3      | 2 | 20682245 | 1 | 3.820089 |
| rs3796064     | HS1BP3      | 2 | 20701799 | 4 | 0.214391 |
| rs1367117     | APOB        | 2 | 21117405 | 2 | 1.475562 |
| rs2712098     | KLHL29      | 2 | 23784218 | 3 | 0.095709 |

|               |         |   |          |   |          |
|---------------|---------|---|----------|---|----------|
| rs3731620     | C2orf44 | 2 | 24115564 | 4 | 6.781458 |
| rs1134516     | PFN4    | 2 | 24196036 | 4 | 4.857953 |
| rs2303291     | ITSN2   | 2 | 24284688 | 2 | 3.374287 |
| rs2303291     | ITSN2   | 2 | 24284688 | 6 | 1.541342 |
| rs2543662     | ITSN2   | 2 | 24296775 | 6 | 0.619171 |
| rs2543662     | ITSN2   | 2 | 24296775 | 2 | 6.207271 |
| rs1203        | ITSN2   | 2 | 24296834 | 6 | 3.950721 |
| rs1203        | ITSN2   | 2 | 24296834 | 2 | 4.297788 |
| rs7603997     | ITSN2   | 2 | 24378462 | 2 | 5.436508 |
| rs7603997     | ITSN2   | 2 | 24378462 | 6 | 1.609758 |
| rs11125744    | NCOA1   | 2 | 24759431 | 4 | 9.631383 |
| rs17737058    | NCOA1   | 2 | 24845073 | 8 | 6.636018 |
| rs17737058    | NCOA1   | 2 | 24845073 | 3 | 0.212962 |
| rs17737058    | NCOA1   | 2 | 24845073 | 1 | 6.403925 |
| rs1044040     | CENPO   | 2 | 24896129 | 4 | 0.100851 |
| rs1172293     | RBJ     | 2 | 25021424 | 8 | 3.934101 |
| rs6749438     | RBJ     | 2 | 25043631 | 5 | 1.149137 |
| rs3731631     | EFR3B   | 2 | 25212926 | 5 | 0.782291 |
| rs3731631     | EFR3B   | 2 | 25212926 | 6 | 0.594985 |
| rs3731631     | EFR3B   | 2 | 25212926 | 4 | 1.505883 |
| rs3731631     | EFR3B   | 2 | 25212926 | 2 | 0.832313 |
| rs2164808     | EFR3B   | 2 | 25230680 | 1 | 1.029076 |
| rs2164808     | EFR3B   | 2 | 25230680 | 3 | 0.336721 |
| rs2164808     | EFR3B   | 2 | 25230680 | 2 | 0.058547 |
| rs2164808     | EFR3B   | 2 | 25230680 | 7 | 0.008451 |
| rs2164808     | EFR3B   | 2 | 25230680 | 6 | 1.464977 |
| rs2118404     | EFR3B   | 2 | 25230833 | 3 | 0.59345  |
| rs2276598     | DNMT3A  | 2 | 25323006 | 1 | 3.633314 |
| rs2276598     | DNMT3A  | 2 | 25323006 | 3 | 0.139737 |
| rs1061485     | KIF3C   | 2 | 26003006 | 1 | 5.294591 |
| rs1061485     | KIF3C   | 2 | 26003006 | 5 | 0.386568 |
| SNP2-26388305 | GPR113  | 2 | 26388305 | 2 | 2.635493 |
| SNP2-26388305 | GPR113  | 2 | 26388305 | 5 | 1.406674 |
| SNP2-26388305 | GPR113  | 2 | 26388305 | 7 | 0.715176 |
| SNP2-26388305 | GPR113  | 2 | 26388305 | 6 | 0.734198 |
| SNP2-26388305 | GPR113  | 2 | 26388305 | 3 | 1.564074 |
| SNP2-26388305 | GPR113  | 2 | 26388305 | 4 | 2.509922 |
| rs2052937     | GPR113  | 2 | 26390198 | 3 | 2.625071 |
| rs2052937     | GPR113  | 2 | 26390198 | 4 | 1.915245 |
| rs2052937     | GPR113  | 2 | 26390198 | 7 | 0.932403 |
| rs2052937     | GPR113  | 2 | 26390198 | 5 | 1.139921 |
| rs934280      | SELI    | 2 | 26461496 | 2 | 3.376235 |
| rs1367231     | SELI    | 2 | 26469905 | 2 | 3.44313  |
| rs3795958     | C2orf39 | 2 | 26520634 | 3 | 0.020719 |
| rs3795958     | C2orf39 | 2 | 26520634 | 5 | 0.039427 |
| rs3795958     | C2orf39 | 2 | 26520634 | 8 | 1.650377 |
| rs3795958     | C2orf39 | 2 | 26520634 | 1 | 1.913629 |

|               |           |   |          |   |          |
|---------------|-----------|---|----------|---|----------|
| rs6749978     | OTOF      | 2 | 26554412 | 7 | 0.563747 |
| SNP2-26653926 | LOC339778 | 2 | 26653926 | 1 | 0.386935 |
| SNP2-26653926 | LOC339778 | 2 | 26653926 | 7 | 0.361538 |
| SNP2-26653926 | LOC339778 | 2 | 26653926 | 6 | 4.085817 |
| SNP2-26653926 | LOC339778 | 2 | 26653926 | 3 | 0.873604 |
| SNP2-26653926 | LOC339778 | 2 | 26653926 | 2 | 0.01934  |
| SNP2-26653926 | LOC339778 | 2 | 26653926 | 8 | 0.696966 |
| rs744539      | CIB4      | 2 | 26657626 | 1 | 1.697996 |
| rs744539      | CIB4      | 2 | 26657626 | 2 | 1.240348 |
| rs744539      | CIB4      | 2 | 26657626 | 7 | 1.242473 |
| rs744540      | CIB4      | 2 | 26657647 | 1 | 0.31415  |
| rs744540      | CIB4      | 2 | 26657647 | 7 | 0.163583 |
| rs935172      | CIB4      | 2 | 26657751 | 1 | 1.235113 |
| rs41288797    | KHK       | 2 | 27174019 | 3 | 1.509995 |
| rs2384571     | CGREF1    | 2 | 27178228 | 3 | 1.332782 |
| rs2384571     | CGREF1    | 2 | 27178228 | 6 | 4.390078 |
| rs2384571     | CGREF1    | 2 | 27178228 | 4 | 1.383218 |
| rs3739092     | CAD       | 2 | 27315580 | 8 | 9.26759  |
| rs3739092     | CAD       | 2 | 27315580 | 3 | 0.692815 |
| rs2304684     | CAD       | 2 | 27319872 | 4 | 7.871372 |
| GA001964      | IFT172    | 2 | 27529791 | 5 | 0.682162 |
| GA001964      | IFT172    | 2 | 27529791 | 7 | 5.088813 |
| GA001964      | IFT172    | 2 | 27529791 | 8 | 7.160039 |
| GA001964      | IFT172    | 2 | 27529791 | 3 | 0.26908  |
| rs1260326     | GCKR      | 2 | 27584444 | 7 | 0.20202  |
| rs1260326     | GCKR      | 2 | 27584444 | 3 | 0.597676 |
| rs1260326     | GCKR      | 2 | 27584444 | 4 | 1.334272 |
| rs1260326     | GCKR      | 2 | 27584444 | 1 | 4.605959 |
| rs1260326     | GCKR      | 2 | 27584444 | 8 | 3.737501 |
| rs1919125     | C2orf16   | 2 | 27654907 | 3 | 0.335006 |
| rs1919125     | C2orf16   | 2 | 27654907 | 4 | 0.24776  |
| rs1919125     | C2orf16   | 2 | 27654907 | 7 | 0.144979 |
| rs1919125     | C2orf16   | 2 | 27654907 | 6 | 4.294144 |
| rs1919125     | C2orf16   | 2 | 27654907 | 5 | 0.347222 |
| rs1919125     | C2orf16   | 2 | 27654907 | 1 | 6.654261 |
| rs3749147     | XAB1      | 2 | 27705422 | 6 | 0.344585 |
| rs3749147     | XAB1      | 2 | 27705422 | 7 | 0.705579 |
| rs3749147     | XAB1      | 2 | 27705422 | 3 | 0.353353 |
| rs3749147     | XAB1      | 2 | 27705422 | 8 | 1.852629 |
| rs13013484    | LOC729833 | 2 | 27842325 | 1 | 0.357217 |
| rs13013484    | LOC729833 | 2 | 27842325 | 4 | 0.355633 |
| rs13013484    | LOC729833 | 2 | 27842325 | 5 | 0.073353 |
| rs35746006    | PLB1      | 2 | 28675117 | 5 | 0.273136 |
| rs35746006    | PLB1      | 2 | 28675117 | 7 | 0.486742 |
| rs7601771     | PLB1      | 2 | 28678297 | 4 | 0.148548 |
| rs7601771     | PLB1      | 2 | 28678297 | 8 | 0.346073 |
| rs7601771     | PLB1      | 2 | 28678297 | 5 | 0.353904 |

|               |           |   |          |   |          |
|---------------|-----------|---|----------|---|----------|
| rs34289907    | PLB1      | 2 | 28681129 | 5 | 0.207705 |
| rs2199619     | PLB1      | 2 | 28708462 | 4 | 0.692617 |
| rs2272387     | PLB1      | 2 | 28719264 | 4 | 2.075743 |
| rs2272387     | PLB1      | 2 | 28719264 | 7 | 2.303356 |
| rs2272386     | PLB1      | 2 | 28719973 | 7 | 2.905598 |
| rs2272386     | PLB1      | 2 | 28719973 | 4 | 2.971541 |
| SNP2-29079008 | LOC165186 | 2 | 29079008 | 1 | 0.162269 |
| SNP2-29093564 | LOC165186 | 2 | 29093564 | 5 | 0.477889 |
| SNP2-29094177 | LOC165186 | 2 | 29094177 | 4 | 2.924792 |
| SNP2-29094177 | LOC165186 | 2 | 29094177 | 5 | 2.992788 |
| SNP2-29109878 | LOC165186 | 2 | 29109878 | 3 | 0.056323 |
| rs10187620    | FLJ34931  | 2 | 29138485 | 7 | 0.882275 |
| rs10187620    | FLJ34931  | 2 | 29138485 | 5 | 0.417287 |
| rs7607027     | FLJ34931  | 2 | 29138714 | 5 | 0.096009 |
| rs7607027     | FLJ34931  | 2 | 29138714 | 3 | 0.131921 |
| rs17692899    | FLJ34931  | 2 | 29138758 | 3 | 0.445078 |
| rs17692899    | FLJ34931  | 2 | 29138758 | 4 | 0.027899 |
| rs1562393     | FLJ34931  | 2 | 29138960 | 5 | 0.268187 |
| rs1562392     | FLJ34931  | 2 | 29139079 | 3 | 0.164019 |
| rs4464231     | FLJ34931  | 2 | 29139217 | 3 | 1.226225 |
| rs958584      | FLJ34931  | 2 | 29139576 | 3 | 0.433445 |
| rs719691      | FLJ34931  | 2 | 29139697 | 5 | 0.268827 |
| rs719691      | FLJ34931  | 2 | 29139697 | 4 | 2.376168 |
| rs719691      | FLJ34931  | 2 | 29139697 | 3 | 2.392696 |
| rs13016696    | FLJ34931  | 2 | 29140409 | 4 | 0.946611 |
| rs13016696    | FLJ34931  | 2 | 29140409 | 3 | 0.21827  |
| rs13016696    | FLJ34931  | 2 | 29140409 | 2 | 4.920859 |
| rs10495767    | FLJ34931  | 2 | 29140696 | 2 | 4.685268 |
| rs10495767    | FLJ34931  | 2 | 29140696 | 4 | 1.988565 |
| rs10495767    | FLJ34931  | 2 | 29140696 | 3 | 0.324668 |
| rs10196859    | FLJ34931  | 2 | 29140731 | 2 | 2.348646 |
| rs10196859    | FLJ34931  | 2 | 29140731 | 3 | 1.43534  |
| rs10196859    | FLJ34931  | 2 | 29140731 | 4 | 0.830587 |
| rs10182566    | FLJ34931  | 2 | 29141212 | 3 | 0.295117 |
| rs10182566    | FLJ34931  | 2 | 29141212 | 2 | 3.880907 |
| rs10182566    | FLJ34931  | 2 | 29141212 | 4 | 0.683727 |
| rs13385188    | FLJ34931  | 2 | 29149180 | 2 | 4.129825 |
| rs13385188    | FLJ34931  | 2 | 29149180 | 4 | 0.797581 |
| rs13385188    | FLJ34931  | 2 | 29149180 | 3 | 0.513517 |
| SNP2-29236760 | CLIP4     | 2 | 29236760 | 6 | 3.476783 |
| SNP2-29236760 | CLIP4     | 2 | 29236760 | 4 | 1.024349 |
| rs3795850     | ALK       | 2 | 29298962 | 5 | 0.184963 |
| rs2293563     | ALK       | 2 | 29303323 | 7 | 1.146494 |
| rs2246745     | ALK       | 2 | 29794033 | 2 | 0.820913 |
| rs2246745     | ALK       | 2 | 29794033 | 1 | 0.022882 |
| rs2246745     | ALK       | 2 | 29794033 | 7 | 0.242692 |
| rs2246745     | ALK       | 2 | 29794033 | 3 | 0.380785 |

|               |         |   |          |   |          |
|---------------|---------|---|----------|---|----------|
| rs13386455    | LBH     | 2 | 30334369 | 5 | 1.384199 |
| rs13386455    | LBH     | 2 | 30334369 | 8 | 0.981496 |
| rs10171296    | LBH     | 2 | 30334813 | 8 | 7.407332 |
| rs10171296    | LBH     | 2 | 30334813 | 5 | 0.886368 |
| rs10171305    | LBH     | 2 | 30334847 | 5 | 0.302115 |
| rs10171305    | LBH     | 2 | 30334847 | 8 | 9.049255 |
| rs9558        | LBH     | 2 | 30335421 | 5 | 0.809001 |
| rs2609945     | LYCAT   | 2 | 30717830 | 8 | 0.033541 |
| rs2609945     | LYCAT   | 2 | 30717830 | 4 | 1.810189 |
| rs2280404     | CAPN13  | 2 | 30799400 | 7 | 1.169802 |
| SNP2-30829465 | CAPN13  | 2 | 30829465 | 8 | 2.348764 |
| SNP2-30829465 | CAPN13  | 2 | 30829465 | 1 | 5.367603 |
| rs508405      | CAPN13  | 2 | 30834444 | 7 | 0.649293 |
| rs508405      | CAPN13  | 2 | 30834444 | 8 | 0.180978 |
| rs13021213    | CAPN13  | 2 | 30863716 | 5 | 0.591957 |
| rs2288100     | GALNT14 | 2 | 31032322 | 5 | 0.326022 |
| rs2288100     | GALNT14 | 2 | 31032322 | 8 | 0.776052 |
| rs4952051     | CAPN14  | 2 | 31249690 | 7 | 1.114593 |
| rs4952051     | CAPN14  | 2 | 31249690 | 4 | 1.20652  |
| rs4952051     | CAPN14  | 2 | 31249690 | 3 | 1.312561 |
| rs4952051     | CAPN14  | 2 | 31249690 | 1 | 4.642566 |
| rs12992405    | CAPN14  | 2 | 31250836 | 3 | 0.034305 |
| rs7422120     | CAPN14  | 2 | 31264157 | 3 | 1.929215 |
| rs7422120     | CAPN14  | 2 | 31264157 | 4 | 2.895924 |
| rs7422120     | CAPN14  | 2 | 31264157 | 1 | 2.152838 |
| rs7587515     | CAPN14  | 2 | 31268355 | 1 | 2.033887 |
| rs7587515     | CAPN14  | 2 | 31268355 | 3 | 0.010599 |
| rs7587515     | CAPN14  | 2 | 31268355 | 7 | 1.019443 |
| rs644926      | EHD3    | 2 | 31343231 | 6 | 5.051698 |
| rs630359      | EHD3    | 2 | 31344220 | 7 | 1.10362  |
| rs630359      | EHD3    | 2 | 31344220 | 6 | 7.066232 |
| rs630359      | EHD3    | 2 | 31344220 | 2 | 3.900691 |
| rs207440      | XDH     | 2 | 31415916 | 8 | 5.360904 |
| rs1884725     | XDH     | 2 | 31425290 | 1 | 1.657722 |
| rs2295475     | XDH     | 2 | 31443351 | 5 | 0.207578 |
| rs4407290     | XDH     | 2 | 31460174 | 5 | 0.071603 |
| rs9332975     | SRD5A2  | 2 | 31603921 | 3 | 1.136973 |
| rs455060      | NLRC4   | 2 | 32328613 | 5 | 0.235534 |
| rs455060      | NLRC4   | 2 | 32328613 | 8 | 0.783504 |
| rs455060      | NLRC4   | 2 | 32328613 | 1 | 3.752821 |
| rs2366894     | BIRC6   | 2 | 32567210 | 4 | 0.957239 |
| rs2366894     | BIRC6   | 2 | 32567210 | 5 | 0.278048 |
| rs2366894     | BIRC6   | 2 | 32567210 | 1 | 5.333364 |
| rs1043463     | BIRC6   | 2 | 32696799 | 5 | 0.0109   |
| rs1043463     | BIRC6   | 2 | 32696799 | 6 | 0.869098 |
| SNP2-32718938 | TTC27   | 2 | 32718938 | 5 | 0.348312 |
| rs2290448     | LTBP1   | 2 | 33300706 | 3 | 1.904879 |



|               |          |   |          |   |          |
|---------------|----------|---|----------|---|----------|
| rs2290448     | LTBP1    | 2 | 33300706 | 5 | 0.076923 |
| rs2290448     | LTBP1    | 2 | 33300706 | 8 | 1.225933 |
| rs2290448     | LTBP1    | 2 | 33300706 | 6 | 0.030631 |
| rs2290448     | LTBP1    | 2 | 33300706 | 7 | 0.766211 |
| rs6706620     | LTBP1    | 2 | 33426059 | 2 | 4.278419 |
| rs6706620     | LTBP1    | 2 | 33426059 | 1 | 0.235501 |
| rs6706620     | LTBP1    | 2 | 33426059 | 3 | 0.483356 |
| rs6543720     | RASGRP3  | 2 | 33590361 | 3 | 0.567296 |
| rs6543720     | RASGRP3  | 2 | 33590361 | 2 | 2.74879  |
| rs35933402    | RASGRP3  | 2 | 33612899 | 1 | 4.904894 |
| SNP2-33617680 | RASGRP3  | 2 | 33617680 | 7 | 1.562397 |
| rs10514775    | RASGRP3  | 2 | 33642536 | 6 | 0.535981 |
| rs10514775    | RASGRP3  | 2 | 33642536 | 2 | 6.302676 |
| rs10514775    | RASGRP3  | 2 | 33642536 | 8 | 4.109948 |
| rs6709378     | RASGRP3  | 2 | 33642572 | 6 | 9.308905 |
| rs6709378     | RASGRP3  | 2 | 33642572 | 3 | 0.288518 |
| rs6709378     | RASGRP3  | 2 | 33642572 | 4 | 4.04785  |
| rs6709378     | RASGRP3  | 2 | 33642572 | 7 | 0.728766 |
| rs6708        | RASGRP3  | 2 | 33643038 | 1 | 0.59652  |
| rs6708        | RASGRP3  | 2 | 33643038 | 2 | 0.474573 |
| rs6708        | RASGRP3  | 2 | 33643038 | 7 | 0.806881 |
| rs6708        | RASGRP3  | 2 | 33643038 | 4 | 0.150949 |
| rs6708        | RASGRP3  | 2 | 33643038 | 3 | 0.173948 |
| rs6708        | RASGRP3  | 2 | 33643038 | 6 | 0.2035   |
| rs11684598    | MYADML   | 2 | 33806125 | 7 | 5.533273 |
| rs11684598    | MYADML   | 2 | 33806125 | 2 | 7.571303 |
| rs11684598    | MYADML   | 2 | 33806125 | 5 | 5.585907 |
| rs11684598    | MYADML   | 2 | 33806125 | 4 | 6.142082 |
| rs11684598    | MYADML   | 2 | 33806125 | 6 | 5.023058 |
| rs1045543     | CRIM1    | 2 | 36629775 | 4 | 0.056951 |
| rs1045543     | CRIM1    | 2 | 36629775 | 8 | 5.114505 |
| rs1045543     | CRIM1    | 2 | 36629775 | 5 | 0.184955 |
| rs1045543     | CRIM1    | 2 | 36629775 | 3 | 0.257688 |
| rs848642      | FEZ2     | 2 | 36636390 | 6 | 0.116612 |
| rs848642      | FEZ2     | 2 | 36636390 | 3 | 0.082316 |
| rs848642      | FEZ2     | 2 | 36636390 | 8 | 0.736494 |
| rs2072526     | VIT      | 2 | 36889438 | 5 | 0.57056  |
| rs12474977    | CCDC75   | 2 | 37176964 | 2 | 4.374189 |
| rs45439591    | SULT6B1  | 2 | 37255860 | 1 | 1.069527 |
| rs3213745     | CEBPZ    | 2 | 37312215 | 4 | 0.282881 |
| rs3213745     | CEBPZ    | 2 | 37312215 | 1 | 0.97763  |
| rs3213745     | CEBPZ    | 2 | 37312215 | 7 | 1.585878 |
| rs3213745     | CEBPZ    | 2 | 37312215 | 2 | 4.070561 |
| rs10177176    | PRKD3    | 2 | 37371549 | 2 | 0.733101 |
| rs10177176    | PRKD3    | 2 | 37371549 | 7 | 0.244094 |
| rs4670697     | QPCT     | 2 | 37453492 | 2 | 5.726591 |
| rs3731852     | CDC42EP3 | 2 | 37724441 | 3 | 0.203787 |

|            |           |   |          |   |          |
|------------|-----------|---|----------|---|----------|
| rs3731852  | CDC42EP3  | 2 | 37724441 | 2 | 3.998043 |
| rs3731852  | CDC42EP3  | 2 | 37724441 | 4 | 8.111798 |
| rs10694    | CDC42EP3  | 2 | 37725643 | 3 | 0.153388 |
| rs4670779  | LOC344382 | 2 | 37897848 | 5 | 7.146269 |
| rs4670779  | LOC344382 | 2 | 37897848 | 4 | 0.985523 |
| rs4670799  | FAM82A    | 2 | 38031910 | 1 | 2.651239 |
| rs4670799  | FAM82A    | 2 | 38031910 | 5 | 1.281789 |
| rs4670799  | FAM82A    | 2 | 38031910 | 6 | 0.447555 |
| rs4670799  | FAM82A    | 2 | 38031910 | 8 | 0.162657 |
| rs4670799  | FAM82A    | 2 | 38031910 | 4 | 0.064795 |
| rs4670799  | FAM82A    | 2 | 38031910 | 3 | 0.366533 |
| rs4670799  | FAM82A    | 2 | 38031910 | 7 | 0.219978 |
| rs9341266  | CYP1B1    | 2 | 38149498 | 7 | 6.075586 |
| rs232620   | C2orf58   | 2 | 38212168 | 3 | 0.417574 |
| rs232620   | C2orf58   | 2 | 38212168 | 4 | 2.011558 |
| rs232620   | C2orf58   | 2 | 38212168 | 6 | 0.083579 |
| rs17420264 | LOC391367 | 2 | 38366297 | 4 | 1.027684 |
| rs2121897  | LOC391367 | 2 | 38366589 | 8 | 0.727325 |
| rs2121897  | LOC391367 | 2 | 38366589 | 4 | 0.209445 |
| rs34873284 | ARL6IP2   | 2 | 38391083 | 2 | 2.15184  |
| rs34873284 | ARL6IP2   | 2 | 38391083 | 5 | 3.155916 |
| rs34873284 | ARL6IP2   | 2 | 38391083 | 7 | 0.723452 |
| rs6741892  | GALM      | 2 | 38770474 | 4 | 0.317235 |
| rs6741892  | GALM      | 2 | 38770474 | 5 | 3.608438 |
| rs3112178  | GALM      | 2 | 38814471 | 7 | 0.058554 |
| rs3770681  | DHX57     | 2 | 38903645 | 7 | 0.411721 |
| rs3770681  | DHX57     | 2 | 38903645 | 3 | 1.23445  |
| rs3770681  | DHX57     | 2 | 38903645 | 6 | 0.073924 |
| rs13386861 | LDHAL3    | 2 | 41901360 | 4 | 5.454267 |
| rs13386861 | LDHAL3    | 2 | 41901360 | 1 | 0.375383 |
| rs4952530  | FLJ44450  | 2 | 41971005 | 5 | 0.631283 |
| rs4952530  | FLJ44450  | 2 | 41971005 | 3 | 0.481117 |
| rs4952530  | FLJ44450  | 2 | 41971005 | 2 | 0.985062 |
| rs4633960  | FLJ44450  | 2 | 41973654 | 1 | 0.09993  |
| rs4633960  | FLJ44450  | 2 | 41973654 | 3 | 0.772751 |
| rs4633960  | FLJ44450  | 2 | 41973654 | 6 | 0.789412 |
| rs4633960  | FLJ44450  | 2 | 41973654 | 5 | 1.565904 |
| rs4633961  | FLJ44450  | 2 | 41973702 | 6 | 0.43531  |
| rs4633961  | FLJ44450  | 2 | 41973702 | 1 | 2.71999  |
| rs4633961  | FLJ44450  | 2 | 41973702 | 3 | 0.732029 |
| rs4633961  | FLJ44450  | 2 | 41973702 | 5 | 2.57825  |
| rs2374377  | FLJ44450  | 2 | 41973810 | 3 | 1.828288 |
| rs2374377  | FLJ44450  | 2 | 41973810 | 6 | 2.599187 |
| rs2374377  | FLJ44450  | 2 | 41973810 | 1 | 2.151684 |
| rs2374377  | FLJ44450  | 2 | 41973810 | 5 | 1.428773 |
| rs2374378  | FLJ44450  | 2 | 41973864 | 1 | 1.143053 |
| rs2374378  | FLJ44450  | 2 | 41973864 | 3 | 1.700727 |

|            |             |   |          |   |          |
|------------|-------------|---|----------|---|----------|
| rs2374378  | FLJ44450    | 2 | 41973864 | 5 | 0.888766 |
| rs2374378  | FLJ44450    | 2 | 41973864 | 6 | 2.871982 |
| rs2374378  | FLJ44450    | 2 | 41973864 | 2 | 2.95762  |
| rs2374379  | FLJ44450    | 2 | 41973947 | 3 | 1.114615 |
| rs2374379  | FLJ44450    | 2 | 41973947 | 1 | 0.285942 |
| rs2374379  | FLJ44450    | 2 | 41973947 | 6 | 1.043932 |
| rs2374379  | FLJ44450    | 2 | 41973947 | 5 | 0.516019 |
| rs2374379  | FLJ44450    | 2 | 41973947 | 2 | 0.767873 |
| rs1044305  | LOC91461    | 2 | 42138388 | 1 | 1.761521 |
| rs2424     | LOC91461    | 2 | 42139079 | 6 | 0.370896 |
| rs2424     | LOC91461    | 2 | 42139079 | 8 | 0.24468  |
| rs2424     | LOC91461    | 2 | 42139079 | 2 | 0.666734 |
| rs1997     | COX7A2L     | 2 | 42431310 | 2 | 0.386264 |
| rs1997     | COX7A2L     | 2 | 42431310 | 5 | 0.884871 |
| rs1997     | COX7A2L     | 2 | 42431310 | 1 | 0.424726 |
| rs11684852 | KCNG3       | 2 | 42523124 | 5 | 3.840014 |
| rs11691584 | KCNG3       | 2 | 42523902 | 5 | 3.101748 |
| rs3796075  | NULL        | 2 | 42575914 | 4 | 0.805118 |
| rs3796075  | NULL        | 2 | 42575914 | 5 | 0.920293 |
| rs3796075  | NULL        | 2 | 42575914 | 3 | 0.755243 |
| rs2278584  | OXER1       | 2 | 42843248 | 4 | 0.121679 |
| rs2278584  | OXER1       | 2 | 42843248 | 5 | 1.227208 |
| rs2278585  | OXER1       | 2 | 42843498 | 5 | 0.515714 |
| rs2304661  | HAAO        | 2 | 42847988 | 5 | 0.538927 |
| rs2304661  | HAAO        | 2 | 42847988 | 8 | 0.837976 |
| rs2304661  | HAAO        | 2 | 42847988 | 3 | 0.801377 |
| rs3816182  | HAAO        | 2 | 42869208 | 1 | 4.423907 |
| rs3816182  | HAAO        | 2 | 42869208 | 5 | 6.038279 |
| rs3816183  | HAAO        | 2 | 42869223 | 3 | 1.398758 |
| rs745763   | MGC40574    | 2 | 43309158 | 1 | 4.476358 |
| rs745763   | MGC40574    | 2 | 43309158 | 4 | 0.288151 |
| rs755862   | hCG_1645220 | 2 | 43756015 | 3 | 0.009588 |
| rs755862   | hCG_1645220 | 2 | 43756015 | 2 | 2.372744 |
| rs755862   | hCG_1645220 | 2 | 43756015 | 5 | 1.150309 |
| rs755862   | hCG_1645220 | 2 | 43756015 | 1 | 0.004302 |
| rs755862   | hCG_1645220 | 2 | 43756015 | 4 | 0.095254 |
| rs12623703 | PLEKHH2     | 2 | 43780963 | 5 | 7.073549 |
| rs12623703 | PLEKHH2     | 2 | 43780963 | 4 | 0.411887 |
| rs12623703 | PLEKHH2     | 2 | 43780963 | 2 | 4.347815 |
| rs10165660 | PLEKHH2     | 2 | 43846952 | 5 | 0.376317 |
| rs10165660 | PLEKHH2     | 2 | 43846952 | 7 | 1.726084 |
| rs13522    | PLEKHH2     | 2 | 43848201 | 7 | 1.472641 |
| rs13522    | PLEKHH2     | 2 | 43848201 | 5 | 0.289611 |
| rs13522    | PLEKHH2     | 2 | 43848201 | 6 | 0.080432 |
| rs13522    | PLEKHH2     | 2 | 43848201 | 8 | 0.355383 |
| rs9309107  | DYNC2LI1    | 2 | 43875330 | 7 | 0.762563 |
| rs9309107  | DYNC2LI1    | 2 | 43875330 | 6 | 3.691742 |

|            |           |   |          |   |          |
|------------|-----------|---|----------|---|----------|
| rs9309107  | DYNC2LI1  | 2 | 43875330 | 5 | 0.080333 |
| rs9309107  | DYNC2LI1  | 2 | 43875330 | 3 | 0.392479 |
| rs9309107  | DYNC2LI1  | 2 | 43875330 | 8 | 0.072253 |
| rs2278357  | ABCG5     | 2 | 43893343 | 4 | 0.047234 |
| rs2278356  | ABCG5     | 2 | 43893379 | 3 | 1.009912 |
| rs6720173  | ABCG5     | 2 | 43893905 | 2 | 3.14794  |
| rs6720173  | ABCG5     | 2 | 43893905 | 4 | 3.783362 |
| rs6720173  | ABCG5     | 2 | 43893905 | 6 | 4.747862 |
| rs6544718  | ABCG8     | 2 | 43958429 | 7 | 1.223908 |
| rs6544718  | ABCG8     | 2 | 43958429 | 6 | 1.111041 |
| rs6544718  | ABCG8     | 2 | 43958429 | 5 | 3.067353 |
| rs3738985  | SLC3A1    | 2 | 44356292 | 1 | 2.198367 |
| rs3738985  | SLC3A1    | 2 | 44356292 | 4 | 0.029306 |
| rs3738985  | SLC3A1    | 2 | 44356292 | 6 | 0.144203 |
| rs3738985  | SLC3A1    | 2 | 44356292 | 5 | 0.139335 |
| rs3738985  | SLC3A1    | 2 | 44356292 | 3 | 0.078043 |
| rs343954   | C2orf34   | 2 | 44853213 | 5 | 0.329846 |
| rs343954   | C2orf34   | 2 | 44853213 | 3 | 0.7117   |
| rs2276655  | SRBD1     | 2 | 45499016 | 3 | 0.113661 |
| rs2276655  | SRBD1     | 2 | 45499016 | 7 | 0.20352  |
| rs880671   | ATP6V1E2  | 2 | 46599760 | 6 | 4.600344 |
| rs880671   | ATP6V1E2  | 2 | 46599760 | 1 | 6.129206 |
| rs880671   | ATP6V1E2  | 2 | 46599760 | 3 | 0.784609 |
| rs896211   | ATP6V1E2  | 2 | 46600186 | 2 | 4.361669 |
| rs6544910  | LOC730078 | 2 | 46735050 | 3 | 0.013713 |
| rs6544910  | LOC730078 | 2 | 46735050 | 1 | 0.157412 |
| rs6544910  | LOC730078 | 2 | 46735050 | 5 | 0.867805 |
| rs17773492 | LOC388948 | 2 | 46898825 | 1 | 5.051856 |
| rs17773492 | LOC388948 | 2 | 46898825 | 3 | 0.243483 |
| rs17773492 | LOC388948 | 2 | 46898825 | 6 | 4.037814 |
| rs17773492 | LOC388948 | 2 | 46898825 | 7 | 1.980349 |
| rs17773492 | LOC388948 | 2 | 46898825 | 5 | 1.376304 |
| rs2278715  | LOC388948 | 2 | 46902913 | 4 | 1.289383 |
| rs2278715  | LOC388948 | 2 | 46902913 | 1 | 0.027083 |
| rs2278715  | LOC388948 | 2 | 46902913 | 5 | 0.59634  |
| rs2278715  | LOC388948 | 2 | 46902913 | 6 | 7.278542 |
| rs2278715  | LOC388948 | 2 | 46902913 | 2 | 0.049402 |
| rs1053952  | LOC388948 | 2 | 46902957 | 4 | 0.211174 |
| rs1053952  | LOC388948 | 2 | 46902957 | 8 | 0.838429 |
| rs1053952  | LOC388948 | 2 | 46902957 | 6 | 0.425928 |
| rs1053952  | LOC388948 | 2 | 46902957 | 1 | 0.236064 |
| rs1053952  | LOC388948 | 2 | 46902957 | 2 | 0.520085 |
| rs17035887 | MCFD2     | 2 | 46983448 | 8 | 7.840705 |
| rs17480869 | TTC7A     | 2 | 47074126 | 6 | 3.130838 |
| rs3739100  | TTC7A     | 2 | 47132405 | 2 | 5.307766 |
| rs815804   | C2orf61   | 2 | 47235846 | 7 | 1.496404 |
| rs815804   | C2orf61   | 2 | 47235846 | 6 | 0.852489 |

|               |             |   |          |   |          |
|---------------|-------------|---|----------|---|----------|
| rs11675417    | hCG_2040054 | 2 | 47607949 | 1 | 1.167304 |
| rs35742253    | FOXN2       | 2 | 48427379 | 7 | 1.751073 |
| rs13015195    | FLJ46838    | 2 | 48611087 | 5 | 0.352501 |
| rs13410391    | FLJ46838    | 2 | 48611327 | 6 | 0.605698 |
| rs940389      | STON1       | 2 | 48661656 | 6 | 3.212384 |
| rs940389      | STON1       | 2 | 48661656 | 5 | 0.124421 |
| rs3749145     | STON1       | 2 | 48662402 | 5 | 0.618189 |
| rs3749145     | STON1       | 2 | 48662402 | 8 | 3.677485 |
| rs3749145     | STON1       | 2 | 48662402 | 6 | 1.677509 |
| rs3792234     | STON1       | 2 | 48663097 | 3 | 0.33818  |
| rs3792234     | STON1       | 2 | 48663097 | 4 | 0.246043 |
| rs3792234     | STON1       | 2 | 48663097 | 8 | 2.586419 |
| rs3792234     | STON1       | 2 | 48663097 | 5 | 1.058827 |
| rs3792234     | STON1       | 2 | 48663097 | 7 | 0.330834 |
| rs2140551     | STON1       | 2 | 48675885 | 5 | 0.123398 |
| rs2140551     | STON1       | 2 | 48675885 | 3 | 0.90124  |
| SNP2-48679154 | STON1       | 2 | 48679154 | 3 | 0.429693 |
| rs13396590    | GTF2A1L     | 2 | 48727166 | 3 | 2.447988 |
| SNP2-48727429 | GTF2A1L     | 2 | 48727429 | 3 | 2.250553 |
| rs11125179    | LHCGR       | 2 | 48769375 | 7 | 2.63399  |
| rs6165        | FSHR        | 2 | 49044545 | 3 | 0.540847 |
| rs1394205     | FSHR        | 2 | 49235089 | 8 | 0.882347 |
| rs1394205     | FSHR        | 2 | 49235089 | 4 | 1.365278 |
| rs3930        | ASB3        | 2 | 53751029 | 3 | 0.088612 |
| rs3930        | ASB3        | 2 | 53751029 | 2 | 6.149338 |
| rs3930        | ASB3        | 2 | 53751029 | 5 | 0.242815 |
| rs1049894     | PSME4       | 2 | 53947460 | 1 | 3.846778 |
| rs805408      | PSME4       | 2 | 53973529 | 6 | 6.108166 |
| rs805408      | PSME4       | 2 | 53973529 | 4 | 0.319089 |
| rs805408      | PSME4       | 2 | 53973529 | 2 | 4.413    |
| rs805423      | PSME4       | 2 | 53980545 | 1 | 0.130834 |
| rs805423      | PSME4       | 2 | 53980545 | 6 | 0.115004 |
| rs805423      | PSME4       | 2 | 53980545 | 5 | 0.287878 |
| rs805423      | PSME4       | 2 | 53980545 | 2 | 1.223279 |
| rs805316      | PSME4       | 2 | 53987248 | 6 | 0.265163 |
| rs805316      | PSME4       | 2 | 53987248 | 2 | 3.227284 |
| rs805316      | PSME4       | 2 | 53987248 | 4 | 0.326656 |
| SNP2-54051333 | PSME4       | 2 | 54051333 | 5 | 0.424115 |
| rs1974771     | LOC729060   | 2 | 54132047 | 4 | 0.250954 |
| rs7590819     | LOC729060   | 2 | 54132108 | 4 | 0.647679 |
| rs7590819     | LOC729060   | 2 | 54132108 | 2 | 1.326934 |
| rs1833497     | LOC729060   | 2 | 54132827 | 8 | 3.749757 |
| rs1833497     | LOC729060   | 2 | 54132827 | 2 | 0.74145  |
| rs1833497     | LOC729060   | 2 | 54132827 | 1 | 1.105449 |
| rs843706      | TSPYL6      | 2 | 54333873 | 5 | 0.035347 |
| rs843706      | TSPYL6      | 2 | 54333873 | 3 | 0.923829 |
| rs843705      | TSPYL6      | 2 | 54335096 | 4 | 0.391683 |

|               |           |   |          |   |          |
|---------------|-----------|---|----------|---|----------|
| rs843705      | TSPYL6    | 2 | 54335096 | 5 | 0.469208 |
| rs843705      | TSPYL6    | 2 | 54335096 | 7 | 0.268315 |
| rs843705      | TSPYL6    | 2 | 54335096 | 2 | 1.628863 |
| rs843705      | TSPYL6    | 2 | 54335096 | 3 | 0.494857 |
| rs10165485    | TSPYL6    | 2 | 54335140 | 3 | 1.062643 |
| rs843704      | TSPYL6    | 2 | 54336468 | 5 | 0.907312 |
| rs843704      | TSPYL6    | 2 | 54336468 | 4 | 1.107298 |
| rs843704      | TSPYL6    | 2 | 54336468 | 2 | 3.31549  |
| rs843704      | TSPYL6    | 2 | 54336468 | 7 | 1.023611 |
| SNP2-54415516 | FLJ40298  | 2 | 54415516 | 1 | 0.795144 |
| rs2280718     | FLJ40298  | 2 | 54441100 | 3 | 0.492164 |
| rs2280718     | FLJ40298  | 2 | 54441100 | 5 | 0.724779 |
| rs2280718     | FLJ40298  | 2 | 54441100 | 4 | 0.66077  |
| rs3796022     | RPL23AP13 | 2 | 54608733 | 5 | 1.00107  |
| rs3796022     | RPL23AP13 | 2 | 54608733 | 4 | 3.901909 |
| rs17346629    | FLJ42562  | 2 | 55039898 | 5 | 0.012721 |
| rs9677948     | C2orf63   | 2 | 55290438 | 7 | 0.672392 |
| SNP2-55312877 | C2orf63   | 2 | 55312877 | 1 | 3.065985 |
| rs2576693     | CCDC88A   | 2 | 55370092 | 7 | 0.015035 |
| rs17347807    | CCDC88A   | 2 | 55370791 | 2 | 5.245164 |
| rs3748943     | NULL      | 2 | 55500265 | 2 | 1.057528 |
| rs3748943     | NULL      | 2 | 55500265 | 7 | 1.155269 |
| rs3748943     | NULL      | 2 | 55500265 | 1 | 0.781598 |
| rs782652      | PNPT1     | 2 | 55716279 | 8 | 3.273444 |
| rs782652      | PNPT1     | 2 | 55716279 | 2 | 0.031849 |
| rs782652      | PNPT1     | 2 | 55716279 | 1 | 0.21464  |
| SNP2-56273800 | CCDC85A   | 2 | 56273800 | 3 | 0.805617 |
| rs11902680    | CCDC85A   | 2 | 56465229 | 1 | 1.180084 |
| rs11902680    | CCDC85A   | 2 | 56465229 | 4 | 0.322885 |
| rs10198826    | LOC442017 | 2 | 60763537 | 6 | 0.44871  |
| rs10198826    | LOC442017 | 2 | 60763537 | 4 | 0.779301 |
| rs12479056    | PUS10     | 2 | 61028816 | 8 | 0.489763 |
| rs12479056    | PUS10     | 2 | 61028816 | 6 | 6.841011 |
| rs1979045     | KIAA1841  | 2 | 61218259 | 4 | 0.264203 |
| rs3213944     | LOC339804 | 2 | 61225802 | 7 | 0.262524 |
| rs3213944     | LOC339804 | 2 | 61225802 | 3 | 0.646875 |
| rs746032      | AHSA2     | 2 | 61258512 | 3 | 0.506294 |
| rs746032      | AHSA2     | 2 | 61258512 | 5 | 0.871482 |
| rs746032      | AHSA2     | 2 | 61258512 | 7 | 0.518424 |
| rs3856522     | AHSA2     | 2 | 61259369 | 5 | 5.650663 |
| rs3856522     | AHSA2     | 2 | 61259369 | 3 | 0.215953 |
| GA020328      | XPO1      | 2 | 61618578 | 3 | 0.709533 |
| GA020328      | XPO1      | 2 | 61618578 | 4 | 0.30388  |
| GA020328      | XPO1      | 2 | 61618578 | 7 | 4.082625 |
| GA020328      | XPO1      | 2 | 61618578 | 5 | 5.064558 |
| rs4672457     | FLJ13305  | 2 | 61920431 | 3 | 1.321414 |
| rs11125895    | FLJ13305  | 2 | 61922862 | 7 | 0.45575  |

|               |             |   |          |   |          |
|---------------|-------------|---|----------|---|----------|
| rs11125895    | FLJ13305    | 2 | 61922862 | 1 | 5.15337  |
| rs4270331     | FLJ13305    | 2 | 61934516 | 3 | 1.362713 |
| rs4233979     | TMEM17      | 2 | 62581406 | 3 | 0.815466 |
| rs4233979     | TMEM17      | 2 | 62581406 | 5 | 0.38737  |
| rs4672527     | TMEM17      | 2 | 62583178 | 5 | 5.499751 |
| rs4672527     | TMEM17      | 2 | 62583178 | 2 | 2.674305 |
| rs11125981    | LOC647112   | 2 | 63765265 | 1 | 3.897096 |
| rs4293553     | FLJ36848    | 2 | 63921212 | 7 | 4.316217 |
| rs4293553     | FLJ36848    | 2 | 63921212 | 3 | 0.153536 |
| rs4293553     | FLJ36848    | 2 | 63921212 | 6 | 0.444085 |
| rs4293553     | FLJ36848    | 2 | 63921212 | 2 | 3.427144 |
| rs17753351    | PELI1       | 2 | 64188898 | 3 | 0.025016 |
| rs1837484     | PELI1       | 2 | 64191245 | 2 | 0.392959 |
| rs1837484     | PELI1       | 2 | 64191245 | 3 | 0.972785 |
| rs1837484     | PELI1       | 2 | 64191245 | 1 | 1.732754 |
| rs2576837     | PELI1       | 2 | 64192781 | 1 | 0.367256 |
| rs2576837     | PELI1       | 2 | 64192781 | 3 | 0.008563 |
| rs7850        | SLC1A4      | 2 | 65103426 | 8 | 0.038665 |
| rs7850        | SLC1A4      | 2 | 65103426 | 2 | 0.000263 |
| rs7850        | SLC1A4      | 2 | 65103426 | 4 | 2.760436 |
| rs1058922     | SLC1A4      | 2 | 65104045 | 4 | 0.995671 |
| rs7572857     | CEP68       | 2 | 65150302 | 1 | 0.839151 |
| rs7572857     | CEP68       | 2 | 65150302 | 7 | 0.040283 |
| rs7572857     | CEP68       | 2 | 65150302 | 2 | 6.235027 |
| rs7572857     | CEP68       | 2 | 65150302 | 3 | 0.493479 |
| SNP2-65152802 | CEP68       | 2 | 65152802 | 8 | 8.145479 |
| SNP2-65152802 | CEP68       | 2 | 65152802 | 3 | 0.486509 |
| SNP2-65152802 | CEP68       | 2 | 65152802 | 2 | 4.789604 |
| rs2008312     | hCG_1986447 | 2 | 65308148 | 4 | 1.662721 |
| rs2008312     | hCG_1986447 | 2 | 65308148 | 5 | 0.613685 |
| rs2008312     | hCG_1986447 | 2 | 65308148 | 3 | 1.461909 |
| rs12622537    | LOC730198   | 2 | 66507478 | 3 | 0.649327 |
| SNP2-67485335 | ETAA1       | 2 | 67485335 | 4 | 1.254326 |
| SNP2-67485335 | ETAA1       | 2 | 67485335 | 6 | 8.136292 |
| SNP2-67485335 | ETAA1       | 2 | 67485335 | 7 | 5.564279 |
| SNP2-67485335 | ETAA1       | 2 | 67485335 | 8 | 6.049103 |
| SNP2-67485335 | ETAA1       | 2 | 67485335 | 5 | 0.515327 |
| rs2044693     | PNO1        | 2 | 68238601 | 8 | 0.658605 |
| rs2044693     | PNO1        | 2 | 68238601 | 5 | 1.188333 |
| rs2044693     | PNO1        | 2 | 68238601 | 4 | 0.933524 |
| rs10197082    | PNO1        | 2 | 68256334 | 4 | 1.141163 |
| rs10197082    | PNO1        | 2 | 68256334 | 5 | 0.997239 |
| rs10197082    | PNO1        | 2 | 68256334 | 8 | 3.52085  |
| rs3816281     | PLEK        | 2 | 68461451 | 5 | 1.222078 |
| rs3816281     | PLEK        | 2 | 68461451 | 6 | 0.325257 |
| rs3816281     | PLEK        | 2 | 68461451 | 3 | 0.006532 |
| rs1063479     | PLEK        | 2 | 68476418 | 7 | 0.991533 |

|            |          |   |          |   |          |
|------------|----------|---|----------|---|----------|
| rs1063479  | PLEK     | 2 | 68476418 | 6 | 1.704099 |
| rs1063479  | PLEK     | 2 | 68476418 | 1 | 2.512229 |
| rs1050181  | PLEK     | 2 | 68476456 | 7 | 0.563785 |
| rs1050181  | PLEK     | 2 | 68476456 | 5 | 1.308367 |
| rs1050181  | PLEK     | 2 | 68476456 | 1 | 1.642568 |
| rs1050181  | PLEK     | 2 | 68476456 | 3 | 1.269138 |
| rs6725743  | PLEK     | 2 | 68476494 | 3 | 0.96719  |
| rs6742200  | PLEK     | 2 | 68476806 | 3 | 0.783129 |
| rs3732044  | PLEK     | 2 | 68477419 | 3 | 0.107874 |
| rs3732044  | PLEK     | 2 | 68477419 | 7 | 0.246536 |
| rs3732044  | PLEK     | 2 | 68477419 | 5 | 1.137052 |
| rs10185052 | C2orf13  | 2 | 68659421 | 3 | 0.379046 |
| rs11685672 | ARHGAP25 | 2 | 68855785 | 4 | 2.114183 |
| rs11685672 | ARHGAP25 | 2 | 68855785 | 8 | 2.803697 |
| rs11685672 | ARHGAP25 | 2 | 68855785 | 6 | 2.907997 |
| rs2280310  | ARHGAP25 | 2 | 68894004 | 5 | 0.880826 |
| rs2280310  | ARHGAP25 | 2 | 68894004 | 3 | 0.753593 |
| rs17604346 | ARHGAP25 | 2 | 68899910 | 5 | 1.595882 |
| rs4241344  | ARHGAP25 | 2 | 68903443 | 5 | 0.705055 |
| rs4241344  | ARHGAP25 | 2 | 68903443 | 3 | 1.284205 |
| rs3749132  | ARHGAP25 | 2 | 68907001 | 5 | 0.517292 |
| rs3749132  | ARHGAP25 | 2 | 68907001 | 3 | 0.281462 |
| rs4453725  | NFU1     | 2 | 69512630 | 2 | 4.777486 |
| rs4453725  | NFU1     | 2 | 69512630 | 8 | 8.169078 |
| rs4453725  | NFU1     | 2 | 69512630 | 4 | 0.057898 |
| rs6721259  | AAK1     | 2 | 69563423 | 5 | 0.049295 |
| rs6721259  | AAK1     | 2 | 69563423 | 1 | 3.850791 |
| rs2276689  | AAK1     | 2 | 69595113 | 1 | 0.776043 |
| rs2276689  | AAK1     | 2 | 69595113 | 4 | 0.37972  |
| rs2276689  | AAK1     | 2 | 69595113 | 5 | 0.502026 |
| rs2276689  | AAK1     | 2 | 69595113 | 2 | 1.031883 |
| rs7603932  | AAK1     | 2 | 69599800 | 5 | 6.347324 |
| rs3087933  | SASP     | 2 | 70041042 | 5 | 0.087012 |
| rs3796097  | SASP     | 2 | 70042180 | 3 | 1.493986 |
| rs3796097  | SASP     | 2 | 70042180 | 4 | 1.016811 |
| rs11556184 | PCYOX1   | 2 | 70338824 | 4 | 1.472136 |
| rs7595934  | PCYOX1   | 2 | 70358476 | 6 | 0.609769 |
| rs7595934  | PCYOX1   | 2 | 70358476 | 5 | 6.802502 |
| rs7595934  | PCYOX1   | 2 | 70358476 | 3 | 0.31522  |
| rs7595934  | PCYOX1   | 2 | 70358476 | 2 | 4.444446 |
| rs473698   | TGFA     | 2 | 70529089 | 4 | 0.602755 |
| rs473698   | TGFA     | 2 | 70529089 | 5 | 0.315828 |
| rs473698   | TGFA     | 2 | 70529089 | 1 | 6.180029 |
| rs473698   | TGFA     | 2 | 70529089 | 7 | 0.503817 |
| rs473698   | TGFA     | 2 | 70529089 | 6 | 5.279914 |
| rs2166975  | TGFA     | 2 | 70531502 | 4 | 0.35163  |
| rs2166975  | TGFA     | 2 | 70531502 | 5 | 0.643952 |



|               |         |   |          |   |          |
|---------------|---------|---|----------|---|----------|
| rs17698193    | ADD2    | 2 | 70743006 | 5 | 0.572292 |
| rs7566541     | FIGLA   | 2 | 70866112 | 4 | 2.366866 |
| rs7566476     | FIGLA   | 2 | 70866242 | 3 | 0.619491 |
| rs7566476     | FIGLA   | 2 | 70866242 | 4 | 2.166949 |
| rs2287100     | CLEC4F  | 2 | 70889590 | 4 | 3.968898 |
| rs2287101     | CLEC4F  | 2 | 70889990 | 4 | 3.650198 |
| rs722896      | CLEC4F  | 2 | 70896969 | 4 | 4.241319 |
| rs722896      | CLEC4F  | 2 | 70896969 | 3 | 0.866356 |
| rs2075221     | CLEC4F  | 2 | 70897719 | 3 | 1.231845 |
| rs2075221     | CLEC4F  | 2 | 70897719 | 4 | 2.274441 |
| rs2075221     | CLEC4F  | 2 | 70897719 | 5 | 0.601069 |
| rs2080390     | CD207   | 2 | 70911734 | 7 | 2.252899 |
| rs13383830    | CD207   | 2 | 70911814 | 7 | 1.583594 |
| SNP2-70912343 | CD207   | 2 | 70912343 | 4 | 2.998173 |
| SNP2-70912343 | CD207   | 2 | 70912343 | 2 | 4.333221 |
| SNP2-70912343 | CD207   | 2 | 70912343 | 7 | 1.589644 |
| SNP2-70912343 | CD207   | 2 | 70912343 | 3 | 0.72008  |
| SNP2-70912343 | CD207   | 2 | 70912343 | 5 | 0.460091 |
| rs3213749     | CD207   | 2 | 70912414 | 7 | 2.990023 |
| rs17006436    | CD207   | 2 | 70913619 | 1 | 6.188066 |
| rs17718987    | CD207   | 2 | 70914444 | 8 | 0.469173 |
| rs17718987    | CD207   | 2 | 70914444 | 5 | 0.491336 |
| rs17718987    | CD207   | 2 | 70914444 | 3 | 1.439914 |
| rs17718987    | CD207   | 2 | 70914444 | 6 | 1.73084  |
| rs17662453    | CD207   | 2 | 70914616 | 7 | 1.527147 |
| rs17662453    | CD207   | 2 | 70914616 | 2 | 0.8656   |
| rs10489990    | CD207   | 2 | 70916156 | 5 | 3.392089 |
| rs10489990    | CD207   | 2 | 70916156 | 1 | 0.734165 |
| rs10489990    | CD207   | 2 | 70916156 | 3 | 1.28048  |
| rs10489990    | CD207   | 2 | 70916156 | 4 | 2.083002 |
| rs10489990    | CD207   | 2 | 70916156 | 2 | 0.28437  |
| rs2234494     | VAX2    | 2 | 70981232 | 7 | 1.314419 |
| rs2234500     | VAX2    | 2 | 71013730 | 7 | 0.929892 |
| rs3796098     | ANKRD53 | 2 | 71065323 | 6 | 0.485237 |
| rs3796098     | ANKRD53 | 2 | 71065323 | 8 | 4.230576 |
| rs3796098     | ANKRD53 | 2 | 71065323 | 5 | 0.844436 |
| SNP2-71065913 | ANKRD53 | 2 | 71065913 | 6 | 0.008839 |
| SNP2-71065913 | ANKRD53 | 2 | 71065913 | 5 | 0.645239 |
| SNP2-71204995 | MCEE    | 2 | 71204995 | 3 | 0.163028 |
| SNP2-71204995 | MCEE    | 2 | 71204995 | 6 | 0.273813 |
| rs3821248     | PAIP2B  | 2 | 71267515 | 2 | 5.946348 |
| rs2257136     | ZNF638  | 2 | 71412432 | 5 | 0.330869 |
| rs2257136     | ZNF638  | 2 | 71412432 | 1 | 4.27033  |
| rs6741336     | DYSF    | 2 | 71534458 | 8 | 9.065283 |
| rs6741336     | DYSF    | 2 | 71534458 | 3 | 0.045371 |
| rs36122356    | DYSF    | 2 | 71601431 | 4 | 0.256312 |
| rs36122356    | DYSF    | 2 | 71601431 | 6 | 1.179999 |

|               |           |   |          |   |          |
|---------------|-----------|---|----------|---|----------|
| rs35984374    | DYSF      | 2 | 71632337 | 2 | 5.110435 |
| rs2303596     | DYSF      | 2 | 71633723 | 3 | 0.528635 |
| rs2303596     | DYSF      | 2 | 71633723 | 2 | 4.497133 |
| rs2288355     | DYSF      | 2 | 71648660 | 8 | 0.04167  |
| rs2288355     | DYSF      | 2 | 71648660 | 7 | 2.279782 |
| rs2288355     | DYSF      | 2 | 71648660 | 6 | 6.638238 |
| rs2288355     | DYSF      | 2 | 71648660 | 1 | 3.981976 |
| rs707718      | CYP26B1   | 2 | 72209957 | 1 | 6.073873 |
| rs707718      | CYP26B1   | 2 | 72209957 | 3 | 0.008387 |
| rs3768647     | CYP26B1   | 2 | 72210963 | 1 | 5.398297 |
| rs653220      | EXOC6B    | 2 | 72561382 | 1 | 5.3056   |
| rs653220      | EXOC6B    | 2 | 72561382 | 7 | 0.353736 |
| rs653220      | EXOC6B    | 2 | 72561382 | 6 | 0.449523 |
| rs12233055    | SFXN5     | 2 | 73079598 | 1 | 1.081873 |
| rs12233055    | SFXN5     | 2 | 73079598 | 8 | 4.590704 |
| rs1046186     | RAB11FIP5 | 2 | 73155195 | 1 | 0.086666 |
| rs1046186     | RAB11FIP5 | 2 | 73155195 | 8 | 4.517784 |
| rs1864488     | RAB11FIP5 | 2 | 73193216 | 1 | 4.457116 |
| rs1864488     | RAB11FIP5 | 2 | 73193216 | 8 | 1.093091 |
| rs1053329     | CCT7      | 2 | 73314991 | 1 | 3.749627 |
| rs1053329     | CCT7      | 2 | 73314991 | 8 | 0.606874 |
| rs1053329     | CCT7      | 2 | 73314991 | 3 | 0.384124 |
| rs1045902     | FBXO41    | 2 | 73336565 | 3 | 0.607386 |
| rs1045902     | FBXO41    | 2 | 73336565 | 8 | 4.778333 |
| rs1045902     | FBXO41    | 2 | 73336565 | 1 | 4.015242 |
| rs1218        | FBXO41    | 2 | 73336694 | 4 | 0.782069 |
| rs34363861    | FBXO41    | 2 | 73343920 | 4 | 2.300632 |
| rs34363861    | FBXO41    | 2 | 73343920 | 8 | 0.16279  |
| rs34363861    | FBXO41    | 2 | 73343920 | 3 | 0.366172 |
| rs34363861    | FBXO41    | 2 | 73343920 | 1 | 4.162538 |
| rs2037814     | ALMS1     | 2 | 73529177 | 2 | 5.77053  |
| rs2037814     | ALMS1     | 2 | 73529177 | 8 | 7.368239 |
| SNP2-73532521 | ALMS1     | 2 | 73532521 | 5 | 0.139825 |
| rs6724782     | ALMS1     | 2 | 73533498 | 2 | 2.385628 |
| rs2017116     | ALMS1     | 2 | 73570611 | 2 | 4.65774  |
| rs1052161     | ALMS1     | 2 | 73682046 | 8 | 5.297065 |
| rs4852974     | NAT8B     | 2 | 73781439 | 6 | 0.068489 |
| rs4852974     | NAT8B     | 2 | 73781439 | 3 | 0.835818 |
| rs4852974     | NAT8B     | 2 | 73781439 | 2 | 3.703101 |
| rs17009399    | STAMBP    | 2 | 73909821 | 7 | 0.809126 |
| rs4853018     | SLC4A5    | 2 | 74320102 | 6 | 0.475929 |
| rs4853018     | SLC4A5    | 2 | 74320102 | 8 | 1.1149   |
| rs4853018     | SLC4A5    | 2 | 74320102 | 5 | 0.599888 |
| rs17009792    | SLC4A5    | 2 | 74342831 | 8 | 0.007882 |
| rs17009792    | SLC4A5    | 2 | 74342831 | 7 | 0.932025 |
| rs9789404     | KRT18P26  | 2 | 74388199 | 5 | 1.505631 |
| rs11555696    | DCTN1     | 2 | 74442113 | 5 | 5.740667 |

|               |           |   |          |   |          |
|---------------|-----------|---|----------|---|----------|
| rs2240444     | LOC388963 | 2 | 74495132 | 5 | 6.154985 |
| rs2268416     | GCS1      | 2 | 74543547 | 5 | 0.331442 |
| rs17009998    | LBX2      | 2 | 74578686 | 5 | 0.967507 |
| rs13023123    | LBX2      | 2 | 74583570 | 4 | 0.308547 |
| rs6546909     | DQX1      | 2 | 74599830 | 5 | 0.050498 |
| rs1183739     | HTRA2     | 2 | 74610056 | 1 | 0.192422 |
| rs1183739     | HTRA2     | 2 | 74610056 | 4 | 0.496889 |
| rs2306808     | HK2       | 2 | 74967297 | 7 | 0.446458 |
| rs2306808     | HK2       | 2 | 74967297 | 4 | 0.154131 |
| rs2306808     | HK2       | 2 | 74967297 | 6 | 0.633903 |
| rs10194657    | HK2       | 2 | 74968616 | 1 | 0.314005 |
| rs10194657    | HK2       | 2 | 74968616 | 4 | 0.308142 |
| rs10194657    | HK2       | 2 | 74968616 | 2 | 6.084173 |
| rs10194657    | HK2       | 2 | 74968616 | 7 | 7.14376  |
| rs881         | TACR1     | 2 | 75129937 | 8 | 0.808716 |
| rs881         | TACR1     | 2 | 75129937 | 7 | 0.18411  |
| rs41382847    | MRPL19    | 2 | 75732867 | 7 | 4.867234 |
| rs17741121    | C2orf3    | 2 | 75743280 | 5 | 5.42635  |
| rs6721752     | REGL      | 2 | 79216759 | 5 | 0.823187 |
| rs1982543     | LOC442021 | 2 | 81275213 | 5 | 0.709292 |
| rs1968722     | LOC388965 | 2 | 84371949 | 5 | 5.565535 |
| rs1968722     | LOC388965 | 2 | 84371949 | 1 | 6.008115 |
| rs1968722     | LOC388965 | 2 | 84371949 | 2 | 5.253104 |
| rs11891970    | FLJ37357  | 2 | 84654116 | 6 | 1.299338 |
| rs11891970    | FLJ37357  | 2 | 84654116 | 5 | 1.842545 |
| rs11547160    | TCF7L1    | 2 | 85389926 | 5 | 5.152011 |
| rs7607284     | TGOLN2    | 2 | 85400887 | 1 | 5.086196 |
| rs7607284     | TGOLN2    | 2 | 85400887 | 5 | 0.169947 |
| rs7607284     | TGOLN2    | 2 | 85400887 | 7 | 5.88607  |
| rs1112848     | TGOLN2    | 2 | 85403255 | 1 | 4.614552 |
| rs10460585    | TGOLN2    | 2 | 85408773 | 7 | 0.456891 |
| rs10460585    | TGOLN2    | 2 | 85408773 | 3 | 0.58701  |
| rs7564372     | RBED1     | 2 | 85443797 | 6 | 6.150508 |
| rs955592      | RBED1     | 2 | 85449329 | 8 | 0.929    |
| SNP2-85471424 | RBED1     | 2 | 85471424 | 5 | 0.623268 |
| rs11544042    | USP39     | 2 | 85696859 | 1 | 5.729866 |
| rs2304564     | USP39     | 2 | 85706178 | 5 | 0.719279 |
| rs7316        | SFTPB     | 2 | 85739524 | 1 | 2.005895 |
| rs11127       | GNLY      | 2 | 85778240 | 8 | 2.139896 |
| rs11127       | GNLY      | 2 | 85778240 | 1 | 2.739452 |
| rs11127       | GNLY      | 2 | 85778240 | 7 | 3.664027 |
| rs11127       | GNLY      | 2 | 85778240 | 5 | 2.106521 |
| rs12845       | GNLY      | 2 | 85779359 | 7 | 0.156189 |
| rs12845       | GNLY      | 2 | 85779359 | 4 | 1.093571 |
| rs12845       | GNLY      | 2 | 85779359 | 8 | 1.559427 |
| rs12845       | GNLY      | 2 | 85779359 | 1 | 0.800123 |
| rs12845       | GNLY      | 2 | 85779359 | 5 | 2.238516 |

|               |           |   |          |   |          |
|---------------|-----------|---|----------|---|----------|
| rs736991      | ATOH8     | 2 | 85867856 | 2 | 0.119565 |
| rs11395       | PTCD3     | 2 | 86219118 | 1 | 3.878258 |
| rs11395       | PTCD3     | 2 | 86219118 | 6 | 5.018474 |
| rs11395       | PTCD3     | 2 | 86219118 | 3 | 0.621022 |
| rs2278084     | PTCD3     | 2 | 86221252 | 6 | 0.268128 |
| SNP2-86286751 | MRPL35    | 2 | 86286751 | 1 | 0.608974 |
| SNP2-86286751 | MRPL35    | 2 | 86286751 | 3 | 0.808001 |
| rs2241432     | MRPL35    | 2 | 86291657 | 3 | 0.548958 |
| rs2241432     | MRPL35    | 2 | 86291657 | 1 | 0.021314 |
| rs2241432     | MRPL35    | 2 | 86291657 | 8 | 4.979485 |
| rs2241432     | MRPL35    | 2 | 86291657 | 2 | 1.591818 |
| rs2276625     | REEP1     | 2 | 86335346 | 2 | 1.378652 |
| rs2276625     | REEP1     | 2 | 86335346 | 7 | 0.376533 |
| rs2276625     | REEP1     | 2 | 86335346 | 8 | 0.364592 |
| rs2276625     | REEP1     | 2 | 86335346 | 1 | 0.345841 |
| rs2276625     | REEP1     | 2 | 86335346 | 3 | 1.34953  |
| rs3020729     | CD8A      | 2 | 86865804 | 2 | 1.402151 |
| rs3020729     | CD8A      | 2 | 86865804 | 6 | 6.372061 |
| rs3020729     | CD8A      | 2 | 86865804 | 3 | 1.251025 |
| rs3020729     | CD8A      | 2 | 86865804 | 4 | 0.291789 |
| rs35555413    | CD8B      | 2 | 86896336 | 5 | 0.955391 |
| rs3970063     | LOC730259 | 2 | 87457994 | 3 | 0.381669 |
| rs3970063     | LOC730259 | 2 | 87457994 | 1 | 0.113995 |
| rs3970063     | LOC730259 | 2 | 87457994 | 4 | 0.133713 |
| rs3970063     | LOC730259 | 2 | 87457994 | 2 | 1.400399 |
| rs3970063     | LOC730259 | 2 | 87457994 | 6 | 0.111675 |
| rs3970063     | LOC730259 | 2 | 87457994 | 7 | 0.004656 |
| rs3970063     | LOC730259 | 2 | 87457994 | 5 | 5.839397 |
| rs1542088     | SMYD1     | 2 | 88168518 | 7 | 1.022567 |
| rs1542088     | SMYD1     | 2 | 88168518 | 5 | 3.74528  |
| rs1542088     | SMYD1     | 2 | 88168518 | 2 | 0.110501 |
| rs1542088     | SMYD1     | 2 | 88168518 | 1 | 0.470505 |
| rs1542087     | SMYD1     | 2 | 88168672 | 5 | 3.094604 |
| rs1542087     | SMYD1     | 2 | 88168672 | 1 | 3.981089 |
| rs2919882     | SMYD1     | 2 | 88177235 | 4 | 0.303829 |
| rs2919882     | SMYD1     | 2 | 88177235 | 1 | 0.851151 |
| rs1441640     | SMYD1     | 2 | 88191846 | 8 | 0.447757 |
| rs1441640     | SMYD1     | 2 | 88191846 | 3 | 0.434733 |
| rs1441640     | SMYD1     | 2 | 88191846 | 2 | 2.394875 |
| rs1441640     | SMYD1     | 2 | 88191846 | 5 | 3.735073 |
| rs1441640     | SMYD1     | 2 | 88191846 | 7 | 0.720969 |
| rs1441641     | SMYD1     | 2 | 88192109 | 7 | 0.523005 |
| rs1441641     | SMYD1     | 2 | 88192109 | 1 | 3.936745 |
| rs1441641     | SMYD1     | 2 | 88192109 | 5 | 2.46776  |
| rs1441641     | SMYD1     | 2 | 88192109 | 4 | 0.623378 |
| rs2919865     | SMYD1     | 2 | 88192720 | 4 | 2.199472 |
| rs2919865     | SMYD1     | 2 | 88192720 | 1 | 4.030006 |

|               |           |   |          |   |          |
|---------------|-----------|---|----------|---|----------|
| rs2919865     | SMYD1     | 2 | 88192720 | 7 | 0.01674  |
| rs2919865     | SMYD1     | 2 | 88192720 | 5 | 3.24558  |
| rs2970889     | SMYD1     | 2 | 88193019 | 5 | 3.852026 |
| rs2970889     | SMYD1     | 2 | 88193019 | 4 | 0.101583 |
| rs2970889     | SMYD1     | 2 | 88193019 | 7 | 0.408929 |
| rs2970889     | SMYD1     | 2 | 88193019 | 1 | 6.780211 |
| rs1978939     | SMYD1     | 2 | 88193154 | 1 | 6.67297  |
| rs1978939     | SMYD1     | 2 | 88193154 | 7 | 1.190005 |
| rs1978939     | SMYD1     | 2 | 88193154 | 4 | 0.286944 |
| rs1978939     | SMYD1     | 2 | 88193154 | 5 | 4.408022 |
| rs1561730     | SMYD1     | 2 | 88193454 | 7 | 4.739677 |
| rs1561730     | SMYD1     | 2 | 88193454 | 4 | 0.165854 |
| rs1561730     | SMYD1     | 2 | 88193454 | 1 | 4.567234 |
| rs1561730     | SMYD1     | 2 | 88193454 | 5 | 3.403321 |
| rs2229169     | ADRA2B    | 2 | 96144443 | 5 | 0.078882 |
| rs9333567     | ADRA2B    | 2 | 96145580 | 4 | 1.584982 |
| rs1657502     | ASTL      | 2 | 96159335 | 5 | 0.063976 |
| rs2276650     | STARD7    | 2 | 96224886 | 1 | 1.924494 |
| rs2279105     | KIAA1754L | 2 | 96357484 | 1 | 4.528678 |
| rs2279105     | KIAA1754L | 2 | 96357484 | 6 | 0.190951 |
| rs2279105     | KIAA1754L | 2 | 96357484 | 3 | 0.519369 |
| rs2279105     | KIAA1754L | 2 | 96357484 | 5 | 7.76006  |
| rs2305935     | NCAPH     | 2 | 96393974 | 5 | 0.545362 |
| rs2305935     | NCAPH     | 2 | 96393974 | 3 | 0.136499 |
| rs2305935     | NCAPH     | 2 | 96393974 | 6 | 0.220608 |
| rs2305935     | NCAPH     | 2 | 96393974 | 1 | 3.915961 |
| rs3731938     | LINCR     | 2 | 96529931 | 1 | 0.544328 |
| rs3731938     | LINCR     | 2 | 96529931 | 8 | 0.488322 |
| rs3731938     | LINCR     | 2 | 96529931 | 6 | 5.358146 |
| rs3731938     | LINCR     | 2 | 96529931 | 2 | 0.909419 |
| rs11677797    | LOC51252  | 2 | 96923486 | 4 | 1.313219 |
| rs4243786     | LOC51252  | 2 | 96927472 | 8 | 4.36432  |
| SNP2-97643522 | ACTR1B    | 2 | 97643522 | 8 | 1.896681 |
| SNP2-97643522 | ACTR1B    | 2 | 97643522 | 2 | 2.51823  |
| SNP2-98145871 | VWA3B     | 2 | 98145871 | 5 | 0.523743 |
| SNP2-98175864 | VWA3B     | 2 | 98175864 | 1 | 0.233546 |
| rs11896729    | UNC50     | 2 | 98592077 | 4 | 5.087898 |
| rs11896729    | UNC50     | 2 | 98592077 | 7 | 1.696003 |
| rs11896729    | UNC50     | 2 | 98592077 | 5 | 0.438927 |
| rs3203856     | UNC50     | 2 | 98592453 | 4 | 0.520472 |
| rs3203856     | UNC50     | 2 | 98592453 | 5 | 5.224468 |
| rs3203856     | UNC50     | 2 | 98592453 | 8 | 0.986907 |
| rs3203856     | UNC50     | 2 | 98592453 | 2 | 0.182136 |
| rs3203856     | UNC50     | 2 | 98592453 | 7 | 0.013592 |
| rs12618769    | MGAT4A    | 2 | 98606363 | 4 | 0.83408  |
| rs12618769    | MGAT4A    | 2 | 98606363 | 7 | 0.776253 |
| rs2277876     | MRPL30    | 2 | 99164030 | 7 | 0.341023 |

|               |         |   |           |   |          |
|---------------|---------|---|-----------|---|----------|
| SNP2-99180046 | MRPL30  | 2 | 99180046  | 6 | 1.001222 |
| SNP2-99180046 | MRPL30  | 2 | 99180046  | 4 | 1.274427 |
| SNP2-99180046 | MRPL30  | 2 | 99180046  | 5 | 0.766681 |
| SNP2-99180046 | MRPL30  | 2 | 99180046  | 8 | 6.375942 |
| rs3087403     | REV1    | 2 | 99425302  | 7 | 0.231709 |
| rs2309821     | LONRF2  | 2 | 100266736 | 1 | 0.613256 |
| rs2309821     | LONRF2  | 2 | 100266736 | 5 | 0.436204 |
| rs2309821     | LONRF2  | 2 | 100266736 | 7 | 0.742504 |
| rs3748928     | LONRF2  | 2 | 100266811 | 7 | 0.865381 |
| rs2309822     | LONRF2  | 2 | 100266838 | 7 | 0.578738 |
| rs2309822     | LONRF2  | 2 | 100266838 | 1 | 0.920598 |
| rs4851287     | LONRF2  | 2 | 100282204 | 7 | 0.657954 |
| rs1530031     | CHST10  | 2 | 100375758 | 4 | 0.023933 |
| rs1530031     | CHST10  | 2 | 100375758 | 3 | 0.111952 |
| rs1530031     | CHST10  | 2 | 100375758 | 1 | 2.486645 |
| rs1530031     | CHST10  | 2 | 100375758 | 5 | 0.083668 |
| rs1530030     | CHST10  | 2 | 100376032 | 3 | 0.007039 |
| rs3748930     | CHST10  | 2 | 100376514 | 5 | 0.74117  |
| rs3748930     | CHST10  | 2 | 100376514 | 3 | 0.783115 |
| rs3748930     | CHST10  | 2 | 100376514 | 1 | 3.09126  |
| rs3828193     | CHST10  | 2 | 100397993 | 3 | 0.115184 |
| rs1562313     | NPAS2   | 2 | 100953887 | 8 | 0.535858 |
| rs9223        | NPAS2   | 2 | 100976259 | 6 | 0.399241 |
| rs1062062     | TBC1D8  | 2 | 100994357 | 7 | 0.150671 |
| rs1007752     | C2orf29 | 2 | 101245455 | 1 | 4.164624 |
| rs1007752     | C2orf29 | 2 | 101245455 | 3 | 0.417956 |
| rs4539813     | CREG2   | 2 | 101331799 | 7 | 2.331841 |
| rs6726192     | CREG2   | 2 | 101331880 | 1 | 0.456302 |
| rs6726192     | CREG2   | 2 | 101331880 | 3 | 0.975674 |
| rs6726192     | CREG2   | 2 | 101331880 | 7 | 1.137328 |
| rs6726192     | CREG2   | 2 | 101331880 | 2 | 0.110348 |
| rs6543032     | CREG2   | 2 | 101333778 | 7 | 1.02674  |
| rs6543032     | CREG2   | 2 | 101333778 | 3 | 1.204965 |
| rs6543032     | CREG2   | 2 | 101333778 | 2 | 1.904474 |
| rs6543032     | CREG2   | 2 | 101333778 | 1 | 1.550195 |
| rs2230400     | IL1R2   | 2 | 101992580 | 5 | 2.487412 |
| rs2302620     | IL1RL2  | 2 | 102208899 | 2 | 0.650322 |
| rs2302620     | IL1RL2  | 2 | 102208899 | 6 | 1.43736  |
| rs2302620     | IL1RL2  | 2 | 102208899 | 1 | 1.073676 |
| rs2302612     | IL1RL2  | 2 | 102218140 | 2 | 0.888052 |
| rs2302612     | IL1RL2  | 2 | 102218140 | 5 | 0.883915 |
| rs2302612     | IL1RL2  | 2 | 102218140 | 1 | 0.616649 |
| rs12905       | IL1RL1  | 2 | 102326439 | 7 | 1.907863 |
| rs12905       | IL1RL1  | 2 | 102326439 | 5 | 0.917071 |
| rs12905       | IL1RL1  | 2 | 102326439 | 6 | 1.822118 |
| rs3771175     | IL1RL1  | 2 | 102326642 | 1 | 0.997201 |
| rs3821204     | IL1RL1  | 2 | 102326713 | 7 | 4.106587 |

|                |           |   |           |   |          |
|----------------|-----------|---|-----------|---|----------|
| rs3821204      | IL1RL1    | 2 | 102326713 | 2 | 2.660442 |
| rs2160203      | IL1RL1    | 2 | 102327256 | 4 | 0.664136 |
| rs2160203      | IL1RL1    | 2 | 102327256 | 1 | 0.940216 |
| rs2160203      | IL1RL1    | 2 | 102327256 | 8 | 0.630125 |
| rs4988956      | IL1RL1    | 2 | 102334439 | 1 | 3.029697 |
| rs1035130      | IL18R1    | 2 | 102367834 | 5 | 0.253885 |
| rs1035130      | IL18R1    | 2 | 102367834 | 7 | 0.069673 |
| rs1035130      | IL18R1    | 2 | 102367834 | 2 | 4.148605 |
| rs1035130      | IL18R1    | 2 | 102367834 | 6 | 0.691028 |
| rs11465656     | IL18R1    | 2 | 102379821 | 7 | 0.774587 |
| SNP2-102379840 | IL18R1    | 2 | 102379840 | 7 | 1.200138 |
| rs3771157      | IL18R1    | 2 | 102379864 | 6 | 1.25481  |
| SNP2-102380734 | IL18R1    | 2 | 102380734 | 2 | 1.752767 |
| SNP2-102380734 | IL18R1    | 2 | 102380734 | 6 | 0.336842 |
| SNP2-102380734 | IL18R1    | 2 | 102380734 | 7 | 1.274418 |
| SNP2-102381128 | IL18R1    | 2 | 102381128 | 6 | 0.166613 |
| SNP2-102381128 | IL18R1    | 2 | 102381128 | 1 | 3.300982 |
| rs7603250      | IL18RAP   | 2 | 102435266 | 4 | 6.364878 |
| rs2732839      | TMEM182   | 2 | 102744992 | 1 | 2.905296 |
| rs2540321      | TMEM182   | 2 | 102800056 | 8 | 6.355657 |
| rs2540321      | TMEM182   | 2 | 102800056 | 1 | 4.939033 |
| rs2540321      | TMEM182   | 2 | 102800056 | 4 | 0.118419 |
| rs3811547      | LOC284998 | 2 | 104729699 | 7 | 4.264845 |
| rs2241797      | TGFBRAP1  | 2 | 105252393 | 4 | 0.937235 |
| rs2241797      | TGFBRAP1  | 2 | 105252393 | 3 | 0.017195 |
| rs2241797      | TGFBRAP1  | 2 | 105252393 | 2 | 2.958598 |
| rs2241797      | TGFBRAP1  | 2 | 105252393 | 7 | 9.218619 |
| rs2241797      | TGFBRAP1  | 2 | 105252393 | 6 | 0.831507 |
| rs10469862     | LOC729030 | 2 | 105876339 | 3 | 0.375055 |
| rs1034813      | ST6GAL2   | 2 | 106869964 | 7 | 0.749111 |
| rs2219078      | SULT1C3   | 2 | 108241630 | 1 | 0.248292 |
| rs2219078      | SULT1C3   | 2 | 108241630 | 7 | 0.393065 |
| rs17036058     | SULT1C2   | 2 | 108277183 | 5 | 1.210569 |
| rs11689841     | SULT1C2   | 2 | 108292004 | 1 | 2.113474 |
| rs11689841     | SULT1C2   | 2 | 108292004 | 3 | 0.819956 |
| rs12477830     | LOC151234 | 2 | 108305167 | 4 | 0.924621 |
| rs12477830     | LOC151234 | 2 | 108305167 | 3 | 0.548617 |
| rs1402467      | SULT1C4   | 2 | 108361240 | 3 | 1.633901 |
| rs1478517      | EDAR      | 2 | 108877369 | 3 | 0.140116 |
| rs13001699     | EDAR      | 2 | 108878666 | 6 | 1.090278 |
| rs12623957     | EDAR      | 2 | 108880086 | 6 | 3.883587 |
| rs3829700      | 10-Sep    | 2 | 109728782 | 4 | 0.135615 |
| rs3829700      | 10-Sep    | 2 | 109728782 | 2 | 0.010906 |
| rs3829700      | 10-Sep    | 2 | 109728782 | 8 | 0.055302 |
| rs3829700      | 10-Sep    | 2 | 109728782 | 1 | 1.236225 |
| rs3829700      | 10-Sep    | 2 | 109728782 | 5 | 0.242651 |
| rs3829700      | 10-Sep    | 2 | 109728782 | 7 | 1.048997 |

|                |          |   |           |   |          |
|----------------|----------|---|-----------|---|----------|
| rs33958626     | NPHP1    | 2 | 110316315 | 7 | 0.091576 |
| SNP2-111279346 | ACOXL    | 2 | 111279346 | 1 | 2.541714 |
| rs4533473      | FLJ44006 | 2 | 111572528 | 1 | 1.59575  |
| rs13027171     | MERTK    | 2 | 112403459 | 1 | 0.076043 |
| rs7604639      | MERTK    | 2 | 112468399 | 6 | 1.992682 |
| rs7604639      | MERTK    | 2 | 112468399 | 7 | 0.236993 |
| rs7604639      | MERTK    | 2 | 112468399 | 3 | 0.393061 |
| rs7604639      | MERTK    | 2 | 112468399 | 4 | 0.450011 |
| rs7604639      | MERTK    | 2 | 112468399 | 1 | 2.791932 |
| rs3811634      | MERTK    | 2 | 112471414 | 2 | 2.15711  |
| rs3811634      | MERTK    | 2 | 112471414 | 7 | 0.744066 |
| rs3811634      | MERTK    | 2 | 112471414 | 6 | 2.454629 |
| rs3811634      | MERTK    | 2 | 112471414 | 1 | 1.51264  |
| rs3811635      | MERTK    | 2 | 112471472 | 3 | 1.248487 |
| rs3811635      | MERTK    | 2 | 112471472 | 4 | 1.555218 |
| rs3811635      | MERTK    | 2 | 112471472 | 6 | 0.819648 |
| rs3811635      | MERTK    | 2 | 112471472 | 1 | 3.886913 |
| rs4848281      | FBLN7    | 2 | 112661659 | 7 | 4.738233 |
| rs4848281      | FBLN7    | 2 | 112661659 | 1 | 3.929841 |
| rs4848281      | FBLN7    | 2 | 112661659 | 8 | 5.221489 |
| rs11123130     | FBLN7    | 2 | 112661691 | 1 | 5.031661 |
| rs7599551      | ZC3H8    | 2 | 112690395 | 5 | 0.516332 |
| rs7599551      | ZC3H8    | 2 | 112690395 | 1 | 3.076689 |
| SNP2-112784093 | ZC3H6    | 2 | 112784093 | 4 | 6.823223 |
| rs3811040      | CKAP2L   | 2 | 113215037 | 3 | 0.320545 |
| rs3811040      | CKAP2L   | 2 | 113215037 | 1 | 3.967395 |
| rs3811040      | CKAP2L   | 2 | 113215037 | 5 | 0.352215 |
| rs17042341     | CKAP2L   | 2 | 113230630 | 4 | 2.32057  |
| rs17561        | IL1A     | 2 | 113253694 | 1 | 0.522994 |
| rs1071676      | IL1B     | 2 | 113303904 | 3 | 0.217066 |
| rs1071676      | IL1B     | 2 | 113303904 | 8 | 4.684904 |
| rs1071676      | IL1B     | 2 | 113303904 | 5 | 0.774514 |
| rs3811047      | IL1F7    | 2 | 113387881 | 3 | 2.419694 |
| rs2708943      | IL1F7    | 2 | 113391180 | 4 | 1.946925 |
| SNP2-113391192 | IL1F7    | 2 | 113391192 | 2 | 2.812225 |
| SNP2-113391192 | IL1F7    | 2 | 113391192 | 4 | 0.299543 |
| rs2708947      | IL1F7    | 2 | 113392690 | 2 | 2.64121  |
| rs2708947      | IL1F7    | 2 | 113392690 | 4 | 0.133789 |
| rs7584409      | IL1F9    | 2 | 113459205 | 3 | 0.324537 |
| rs11673918     | IL1F8    | 2 | 113501673 | 3 | 1.511075 |
| rs2305150      | IL1F8    | 2 | 113505787 | 3 | 1.66153  |
| rs2305150      | IL1F8    | 2 | 113505787 | 6 | 0.985307 |
| rs1992762      | IL1F8    | 2 | 113526884 | 5 | 1.610228 |
| rs2515401      | IL1F5    | 2 | 113536947 | 6 | 1.08957  |
| rs2515401      | IL1F5    | 2 | 113536947 | 5 | 1.953672 |
| rs3180235      | IL1F5    | 2 | 113537143 | 6 | 2.328512 |
| rs3180235      | IL1F5    | 2 | 113537143 | 5 | 1.759478 |



|            |           |   |           |   |          |
|------------|-----------|---|-----------|---|----------|
| rs2515403  | IL1F5     | 2 | 113537203 | 5 | 1.704457 |
| rs2515403  | IL1F5     | 2 | 113537203 | 6 | 0.205063 |
| rs2515404  | IL1F5     | 2 | 113537588 | 3 | 3.100609 |
| rs2515404  | IL1F5     | 2 | 113537588 | 6 | 1.122233 |
| rs768627   | IL1F5     | 2 | 113538124 | 5 | 1.565206 |
| rs768627   | IL1F5     | 2 | 113538124 | 6 | 2.239942 |
| rs13005572 | IL1F10    | 2 | 113549452 | 5 | 0.914412 |
| rs13005572 | IL1F10    | 2 | 113549452 | 1 | 2.031168 |
| rs4849167  | PSD4      | 2 | 113657310 | 3 | 0.781073 |
| rs4849167  | PSD4      | 2 | 113657310 | 6 | 0.405979 |
| rs4849167  | PSD4      | 2 | 113657310 | 2 | 5.006676 |
| rs2276561  | PSD4      | 2 | 113672842 | 7 | 0.836533 |
| rs2276561  | PSD4      | 2 | 113672842 | 4 | 3.028812 |
| rs2276561  | PSD4      | 2 | 113672842 | 1 | 4.203086 |
| rs2019137  | PAX8      | 2 | 113690103 | 4 | 0.895901 |
| rs2019137  | PAX8      | 2 | 113690103 | 1 | 4.351133 |
| rs2019137  | PAX8      | 2 | 113690103 | 7 | 0.252175 |
| rs895412   | PAX8      | 2 | 113690435 | 4 | 2.338717 |
| rs895412   | PAX8      | 2 | 113690435 | 1 | 4.623109 |
| rs895412   | PAX8      | 2 | 113690435 | 7 | 2.900515 |
| rs874898   | PAX8      | 2 | 113690667 | 2 | 3.725816 |
| rs874898   | PAX8      | 2 | 113690667 | 1 | 0.142077 |
| rs7605071  | LOC728055 | 2 | 114363317 | 3 | 0.637678 |
| rs7605071  | LOC728055 | 2 | 114363317 | 7 | 1.572235 |
| rs7605071  | LOC728055 | 2 | 114363317 | 6 | 1.22016  |
| rs7564594  | LOC728055 | 2 | 114363902 | 7 | 0.145214 |
| rs272008   | DPP10     | 2 | 116318101 | 3 | 1.061382 |
| rs2303348  | DDX18     | 2 | 118300410 | 4 | 2.643239 |
| rs2303348  | DDX18     | 2 | 118300410 | 5 | 0.709032 |
| rs2303348  | DDX18     | 2 | 118300410 | 6 | 0.78405  |
| rs2303348  | DDX18     | 2 | 118300410 | 3 | 0.818298 |
| rs2303348  | DDX18     | 2 | 118300410 | 8 | 5.928803 |
| rs11556267 | CCDC93    | 2 | 118392899 | 2 | 0.705129 |
| rs11556267 | CCDC93    | 2 | 118392899 | 1 | 0.246619 |
| rs17569222 | CCDC93    | 2 | 118394283 | 1 | 4.07029  |
| rs6761637  | MARCO     | 2 | 119455533 | 3 | 0.2548   |
| rs6758051  | C1QL2     | 2 | 119630571 | 3 | 0.785665 |
| rs17013371 | STEAP3    | 2 | 119721782 | 1 | 5.694355 |
| rs17805141 | STEAP3    | 2 | 119722039 | 6 | 8.321878 |
| rs8600     | LOC130355 | 2 | 119776391 | 6 | 3.306804 |
| rs6730220  | LOC130355 | 2 | 119814321 | 5 | 2.580045 |
| rs6730220  | LOC130355 | 2 | 119814321 | 1 | 1.563106 |
| rs6730220  | LOC130355 | 2 | 119814321 | 8 | 0.869908 |
| rs6730220  | LOC130355 | 2 | 119814321 | 4 | 1.800782 |
| rs6730220  | LOC130355 | 2 | 119814321 | 2 | 6.003837 |
| rs6730220  | LOC130355 | 2 | 119814321 | 7 | 1.112368 |
| rs6761357  | MGC33657  | 2 | 120130553 | 3 | 0.22164  |

|                |           |   |           |   |          |
|----------------|-----------|---|-----------|---|----------|
| SNP2-120154993 | TMEM177   | 2 | 120154993 | 1 | 4.603726 |
| SNP2-120154993 | TMEM177   | 2 | 120154993 | 8 | 5.930429 |
| SNP2-120154993 | TMEM177   | 2 | 120154993 | 6 | 1.347503 |
| SNP2-120154993 | TMEM177   | 2 | 120154993 | 5 | 6.710488 |
| rs1983406      | TMEM177   | 2 | 120155700 | 1 | 6.113044 |
| rs1983406      | TMEM177   | 2 | 120155700 | 5 | 1.192636 |
| rs1983406      | TMEM177   | 2 | 120155700 | 8 | 0.349791 |
| rs2278741      | GLI2      | 2 | 121465537 | 3 | 0.399336 |
| rs2278741      | GLI2      | 2 | 121465537 | 1 | 0.369491 |
| rs3795853      | TFCP2L1   | 2 | 121698078 | 3 | 0.183096 |
| rs11890430     | TFCP2L1   | 2 | 121698420 | 4 | 4.36394  |
| rs11890430     | TFCP2L1   | 2 | 121698420 | 3 | 0.896841 |
| rs11890430     | TFCP2L1   | 2 | 121698420 | 8 | 0.268132 |
| rs6568         | GYPC      | 2 | 127170700 | 5 | 0.940672 |
| rs7568070      | CYP27C1   | 2 | 127669524 | 6 | 0.096025 |
| rs7568070      | CYP27C1   | 2 | 127669524 | 1 | 2.336214 |
| rs7568070      | CYP27C1   | 2 | 127669524 | 5 | 0.829417 |
| rs1803541      | ERCC3     | 2 | 127731383 | 8 | 0.418903 |
| rs9282675      | ERCC3     | 2 | 127768196 | 3 | 0.501704 |
| rs3732209      | MAP3K2    | 2 | 127796276 | 1 | 3.320103 |
| rs3732209      | MAP3K2    | 2 | 127796276 | 5 | 0.16797  |
| rs3732209      | MAP3K2    | 2 | 127796276 | 3 | 0.301856 |
| rs2404991      | MYO7B     | 2 | 128038240 | 3 | 0.238876 |
| rs891515       | LIMS2     | 2 | 128113277 | 8 | 0.857532 |
| rs891515       | LIMS2     | 2 | 128113277 | 5 | 0.209002 |
| rs1048211      | SFT2D3    | 2 | 128175509 | 1 | 0.006849 |
| rs1048211      | SFT2D3    | 2 | 128175509 | 7 | 0.168594 |
| rs1048211      | SFT2D3    | 2 | 128175509 | 4 | 0.708721 |
| rs34550770     | WDR33     | 2 | 128180586 | 4 | 0.115365 |
| rs17534123     | WDR33     | 2 | 128238677 | 8 | 0.136921 |
| rs10183605     | AMMECR1L  | 2 | 128358837 | 4 | 0.11708  |
| rs10183605     | AMMECR1L  | 2 | 128358837 | 5 | 0.463677 |
| rs10183605     | AMMECR1L  | 2 | 128358837 | 2 | 5.655593 |
| rs3177472      | CCDC74B   | 2 | 130613704 | 8 | 4.583005 |
| rs3929204      | LOC284988 | 2 | 130685166 | 5 | 6.379923 |
| rs3929204      | LOC284988 | 2 | 130685166 | 7 | 5.839168 |
| rs11542411     | IMP4      | 2 | 130817204 | 1 | 4.539647 |
| rs6752575      | LOC730032 | 2 | 131388571 | 3 | 0.578797 |
| SNP2-131405253 | ARHGEF4   | 2 | 131405253 | 3 | 6.178154 |
| rs7573518      | LOC389043 | 2 | 131882857 | 7 | 3.995    |
| rs7573518      | LOC389043 | 2 | 131882857 | 6 | 3.436499 |
| rs35837041     | LOC389049 | 2 | 132197350 | 3 | 3.847392 |
| rs2241764      | GPR39     | 2 | 132891234 | 3 | 0.814948 |
| rs2241764      | GPR39     | 2 | 132891234 | 5 | 0.561311 |
| rs2241764      | GPR39     | 2 | 132891234 | 1 | 0.524591 |
| rs2241764      | GPR39     | 2 | 132891234 | 7 | 0.82251  |
| rs2241764      | GPR39     | 2 | 132891234 | 4 | 0.148155 |

|                |           |   |           |   |          |
|----------------|-----------|---|-----------|---|----------|
| rs2241764      | GPR39     | 2 | 132891234 | 2 | 3.867997 |
| rs1131671      | LYPD1     | 2 | 133119077 | 5 | 4.912721 |
| SNP2-133259044 | NAP5      | 2 | 133259044 | 5 | 4.713353 |
| SNP2-133259044 | NAP5      | 2 | 133259044 | 4 | 0.197749 |
| SNP2-133259044 | NAP5      | 2 | 133259044 | 8 | 1.058252 |
| rs1112542      | YSK4      | 2 | 135460886 | 3 | 0.920998 |
| rs10928526     | YSK4      | 2 | 135462192 | 3 | 0.646335 |
| SNP2-135704597 | ZRANB3    | 2 | 135704597 | 5 | 6.119285 |
| rs1042712      | LCT       | 2 | 136262314 | 1 | 0.552862 |
| rs1042712      | LCT       | 2 | 136262314 | 4 | 0.269792 |
| rs1042712      | LCT       | 2 | 136262314 | 3 | 0.197085 |
| rs1042712      | LCT       | 2 | 136262314 | 2 | 5.43762  |
| rs1042712      | LCT       | 2 | 136262314 | 7 | 4.035404 |
| rs1042712      | LCT       | 2 | 136262314 | 5 | 0.813375 |
| rs2322659      | LCT       | 2 | 136272129 | 5 | 0.100879 |
| rs2322659      | LCT       | 2 | 136272129 | 7 | 0.819916 |
| rs2322659      | LCT       | 2 | 136272129 | 1 | 1.018259 |
| rs2322659      | LCT       | 2 | 136272129 | 3 | 1.340725 |
| rs2304371      | LCT       | 2 | 136278027 | 3 | 1.124464 |
| rs3754689      | LCT       | 2 | 136307216 | 3 | 1.443035 |
| rs3754689      | LCT       | 2 | 136307216 | 5 | 0.38201  |
| rs6738266      | DARS      | 2 | 136459642 | 5 | 0.313958 |
| rs4954474      | THSD7B    | 2 | 137634392 | 5 | 0.120574 |
| rs4245861      | HNMT      | 2 | 138489164 | 3 | 0.116991 |
| rs4245861      | HNMT      | 2 | 138489164 | 1 | 5.653292 |
| rs4646333      | HNMT      | 2 | 138489699 | 1 | 4.759117 |
| rs4646333      | HNMT      | 2 | 138489699 | 3 | 0.835377 |
| rs1455158      | HNMT      | 2 | 138490108 | 3 | 0.348905 |
| rs1455158      | HNMT      | 2 | 138490108 | 1 | 4.621247 |
| rs1455156      | HNMT      | 2 | 138490281 | 1 | 5.195306 |
| rs1455156      | HNMT      | 2 | 138490281 | 3 | 0.203817 |
| rs6726278      | LOC440917 | 2 | 138761322 | 3 | 4.984139 |
| rs6726278      | LOC440917 | 2 | 138761322 | 1 | 4.516462 |
| rs13033503     | LOC440917 | 2 | 138762457 | 7 | 0.162848 |
| rs13033503     | LOC440917 | 2 | 138762457 | 1 | 0.059833 |
| rs13382964     | LOC440917 | 2 | 138762855 | 1 | 2.963834 |
| rs4954919      | LOC647002 | 2 | 138781881 | 8 | 4.36268  |
| rs13404361     | SPOPL     | 2 | 139045361 | 5 | 5.824294 |
| rs12470151     | LOC129560 | 2 | 139375744 | 3 | 2.324576 |
| rs12470151     | LOC129560 | 2 | 139375744 | 6 | 2.266295 |
| rs1486961      | LRP1B     | 2 | 140705983 | 1 | 5.068112 |
| rs16843826     | LRP1B     | 2 | 140825001 | 7 | 0.870716 |
| rs16843864     | LRP1B     | 2 | 140847165 | 7 | 0.850534 |
| rs16843864     | LRP1B     | 2 | 140847165 | 8 | 0.472411 |
| rs4954672      | LRP1B     | 2 | 140991046 | 2 | 2.497311 |
| rs4954672      | LRP1B     | 2 | 140991046 | 5 | 0.449836 |
| rs10164457     | LRP1B     | 2 | 142605607 | 7 | 0.898922 |

|                |           |   |           |   |          |
|----------------|-----------|---|-----------|---|----------|
| rs10211565     | LRP1B     | 2 | 142605624 | 2 | 3.06907  |
| rs897172       | ORC4L     | 2 | 148494742 | 3 | 0.025003 |
| rs897172       | ORC4L     | 2 | 148494742 | 8 | 0.158623 |
| rs897172       | ORC4L     | 2 | 148494742 | 7 | 0.039586 |
| rs897172       | ORC4L     | 2 | 148494742 | 6 | 1.161668 |
| rs897172       | ORC4L     | 2 | 148494742 | 5 | 8.279937 |
| rs1196665      | LYPD6     | 2 | 150037158 | 4 | 1.155126 |
| rs1196665      | LYPD6     | 2 | 150037158 | 2 | 2.912489 |
| rs1196665      | LYPD6     | 2 | 150037158 | 5 | 0.166637 |
| rs1196665      | LYPD6     | 2 | 150037158 | 8 | 0.157285 |
| rs871          | LYPD6     | 2 | 150038219 | 2 | 3.126794 |
| rs4667419      | LOC642340 | 2 | 150152059 | 4 | 0.989973 |
| rs4667419      | LOC642340 | 2 | 150152059 | 5 | 2.642797 |
| rs4667419      | LOC642340 | 2 | 150152059 | 8 | 0.739454 |
| rs4667393      | FLJ32955  | 2 | 150423086 | 3 | 0.872257 |
| rs11551174     | NMI       | 2 | 151843661 | 5 | 5.31268  |
| SNP2-151928756 | TNFAIP6   | 2 | 151928756 | 1 | 1.303127 |
| rs1046668      | TNFAIP6   | 2 | 151934816 | 1 | 2.136594 |
| rs1046668      | TNFAIP6   | 2 | 151934816 | 7 | 1.678954 |
| rs2290368      | RIF1      | 2 | 151974719 | 1 | 2.789278 |
| rs2290368      | RIF1      | 2 | 151974719 | 7 | 1.653052 |
| rs2290368      | RIF1      | 2 | 151974719 | 6 | 0.292447 |
| rs2290368      | RIF1      | 2 | 151974719 | 3 | 0.842947 |
| rs2290368      | RIF1      | 2 | 151974719 | 8 | 3.438769 |
| rs1061305      | NEB       | 2 | 152055225 | 7 | 4.672218 |
| rs1061305      | NEB       | 2 | 152055225 | 3 | 2.270755 |
| rs1061305      | NEB       | 2 | 152055225 | 2 | 6.162866 |
| rs1061305      | NEB       | 2 | 152055225 | 4 | 1.425835 |
| rs1061305      | NEB       | 2 | 152055225 | 6 | 3.289043 |
| rs4664475      | NEB       | 2 | 152095799 | 5 | 0.390768 |
| rs4664475      | NEB       | 2 | 152095799 | 1 | 4.818651 |
| rs4664475      | NEB       | 2 | 152095799 | 4 | 0.734346 |
| rs2288210      | NEB       | 2 | 152130322 | 5 | 0.585367 |
| rs2288210      | NEB       | 2 | 152130322 | 8 | 2.136316 |
| rs2288210      | NEB       | 2 | 152130322 | 1 | 4.876832 |
| rs2288210      | NEB       | 2 | 152130322 | 4 | 1.226201 |
| rs2288211      | NEB       | 2 | 152130333 | 7 | 0.758881 |
| rs2288211      | NEB       | 2 | 152130333 | 2 | 0.151833 |
| rs2288211      | NEB       | 2 | 152130333 | 5 | 0.089731 |
| rs2288211      | NEB       | 2 | 152130333 | 6 | 0.13033  |
| rs2288211      | NEB       | 2 | 152130333 | 1 | 2.530226 |
| SNP2-152184274 | NEB       | 2 | 152184274 | 4 | 0.072476 |
| SNP2-152184274 | NEB       | 2 | 152184274 | 6 | 0.298358 |
| SNP2-152184274 | NEB       | 2 | 152184274 | 2 | 5.070101 |
| SNP2-152184274 | NEB       | 2 | 152184274 | 7 | 0.844799 |
| rs6713162      | NEB       | 2 | 152204772 | 8 | 1.084694 |
| rs6713162      | NEB       | 2 | 152204772 | 3 | 2.847112 |

|                |           |   |           |   |          |
|----------------|-----------|---|-----------|---|----------|
| rs10170273     | NEB       | 2 | 152229342 | 3 | 2.462735 |
| rs7426114      | NEB       | 2 | 152235818 | 8 | 2.068098 |
| rs7426114      | NEB       | 2 | 152235818 | 3 | 3.441461 |
| SNP2-152235854 | NEB       | 2 | 152235854 | 3 | 2.122523 |
| rs6735208      | NEB       | 2 | 152244744 | 3 | 1.898244 |
| rs6735208      | NEB       | 2 | 152244744 | 8 | 1.384226 |
| rs4611637      | NEB       | 2 | 152282227 | 3 | 1.420793 |
| rs7597215      | CACNB4    | 2 | 152403437 | 3 | 0.423    |
| rs6744595      | LOC391453 | 2 | 153939388 | 3 | 1.702944 |
| rs3863911      | LOC642635 | 2 | 153986486 | 1 | 0.258631 |
| rs3863911      | LOC642635 | 2 | 153986486 | 2 | 2.154988 |
| rs707081       | GALNT13   | 2 | 155015863 | 3 | 2.694944 |
| rs707081       | GALNT13   | 2 | 155015863 | 2 | 4.47233  |
| rs707081       | GALNT13   | 2 | 155015863 | 6 | 0.042569 |
| rs707081       | GALNT13   | 2 | 155015863 | 4 | 0.091072 |
| rs707081       | GALNT13   | 2 | 155015863 | 7 | 0.141106 |
| rs707081       | GALNT13   | 2 | 155015863 | 5 | 0.781836 |
| rs707081       | GALNT13   | 2 | 155015863 | 1 | 0.269625 |
| rs707084       | GALNT13   | 2 | 155016307 | 3 | 2.989065 |
| rs707084       | GALNT13   | 2 | 155016307 | 4 | 1.13879  |
| rs707084       | GALNT13   | 2 | 155016307 | 2 | 1.403717 |
| rs707084       | GALNT13   | 2 | 155016307 | 5 | 1.079589 |
| rs7582614      | GALNT13   | 2 | 155016918 | 3 | 3.324853 |
| rs7582614      | GALNT13   | 2 | 155016918 | 7 | 0.486639 |
| rs7582614      | GALNT13   | 2 | 155016918 | 6 | 1.130416 |
| rs7582614      | GALNT13   | 2 | 155016918 | 2 | 5.887557 |
| rs17266469     | GPD2      | 2 | 157134218 | 4 | 3.175939 |
| rs4556933      | ACVR1C    | 2 | 158152135 | 6 | 4.373245 |
| rs4556933      | ACVR1C    | 2 | 158152135 | 8 | 0.562638 |
| rs4556933      | ACVR1C    | 2 | 158152135 | 7 | 0.580328 |
| rs4556933      | ACVR1C    | 2 | 158152135 | 4 | 0.041604 |
| rs4556933      | ACVR1C    | 2 | 158152135 | 3 | 0.228102 |
| rs17805784     | CCDC148   | 2 | 158736910 | 5 | 0.396506 |
| rs17805784     | CCDC148   | 2 | 158736910 | 7 | 2.032404 |
| rs17805784     | CCDC148   | 2 | 158736910 | 4 | 0.777155 |
| rs7559772      | CCDC148   | 2 | 158874315 | 7 | 0.334326 |
| rs16842890     | CCDC148   | 2 | 158903528 | 3 | 0.30962  |
| rs17810398     | DAPL1     | 2 | 159369116 | 7 | 1.205178 |
| rs9869         | DAPL1     | 2 | 159371845 | 5 | 1.172155 |
| rs9869         | DAPL1     | 2 | 159371845 | 1 | 0.345696 |
| rs9869         | DAPL1     | 2 | 159371845 | 4 | 0.883571 |
| rs10016        | DAPL1     | 2 | 159380688 | 3 | 2.28002  |
| rs10016        | DAPL1     | 2 | 159380688 | 1 | 0.232603 |
| rs10016        | DAPL1     | 2 | 159380688 | 2 | 1.739752 |
| SNP2-159794900 | TANC1     | 2 | 159794900 | 7 | 0.152621 |
| SNP2-159794900 | TANC1     | 2 | 159794900 | 4 | 2.642063 |
| SNP2-159794900 | TANC1     | 2 | 159794900 | 3 | 0.024935 |

|                |           |   |           |   |          |
|----------------|-----------|---|-----------|---|----------|
| SNP2-159794900 | TANC1     | 2 | 159794900 | 6 | 9.682967 |
| rs6707733      | LOC728059 | 2 | 160027836 | 7 | 4.631496 |
| rs1126842      | CD302     | 2 | 160335563 | 1 | 0.083224 |
| rs1126842      | CD302     | 2 | 160335563 | 8 | 4.146053 |
| rs1126842      | CD302     | 2 | 160335563 | 6 | 3.567266 |
| rs1126842      | CD302     | 2 | 160335563 | 5 | 0.2308   |
| rs1126842      | CD302     | 2 | 160335563 | 2 | 2.842601 |
| rs35941588     | LY75      | 2 | 160381765 | 3 | 0.353982 |
| rs3951216      | LY75      | 2 | 160419291 | 7 | 1.036998 |
| rs3951216      | LY75      | 2 | 160419291 | 6 | 5.109095 |
| rs3951216      | LY75      | 2 | 160419291 | 5 | 0.103853 |
| SNP2-160587505 | PLA2R1    | 2 | 160587505 | 3 | 0.732739 |
| SNP2-160587505 | PLA2R1    | 2 | 160587505 | 6 | 0.664142 |
| SNP2-160593688 | PLA2R1    | 2 | 160593688 | 2 | 2.995954 |
| SNP2-160593688 | PLA2R1    | 2 | 160593688 | 1 | 0.736366 |
| SNP2-160593688 | PLA2R1    | 2 | 160593688 | 6 | 3.366377 |
| SNP2-160593688 | PLA2R1    | 2 | 160593688 | 5 | 0.170606 |
| SNP2-160593688 | PLA2R1    | 2 | 160593688 | 8 | 0.696845 |
| rs1430         | RBMS1     | 2 | 160882939 | 1 | 0.219748 |
| rs1430         | RBMS1     | 2 | 160882939 | 2 | 0.574901 |
| rs1430         | RBMS1     | 2 | 160882939 | 3 | 0.288052 |
| rs1430         | RBMS1     | 2 | 160882939 | 4 | 0.883323 |
| rs17574        | DPP4      | 2 | 162638225 | 5 | 0.566515 |
| rs2298771      | SCN1A     | 2 | 166601034 | 6 | 1.808689 |
| rs2298771      | SCN1A     | 2 | 166601034 | 1 | 0.319555 |
| SNP2-166849355 | SCN9A     | 2 | 166849355 | 3 | 0.418404 |
| rs13402180     | SCN9A     | 2 | 166853241 | 3 | 1.177488 |
| rs13414203     | SCN9A     | 2 | 166853388 | 5 | 0.179188 |
| rs11888208     | SCN7A     | 2 | 167021697 | 5 | 0.905887 |
| rs7565062      | SCN7A     | 2 | 167042331 | 2 | 2.500375 |
| SNP2-167813941 | XIRP2     | 2 | 167813941 | 7 | 0.730606 |
| SNP2-167824043 | XIRP2     | 2 | 167824043 | 4 | 0.540148 |
| rs836722       | B3GALT1   | 2 | 168383434 | 2 | 1.889569 |
| rs492594       | G6PC2     | 2 | 169472422 | 1 | 0.180742 |
| rs2232328      | G6PC2     | 2 | 169472792 | 5 | 0.521077 |
| rs496550       | ABCB11    | 2 | 169487958 | 7 | 0.434712 |
| rs496550       | ABCB11    | 2 | 169487958 | 4 | 0.450743 |
| rs496550       | ABCB11    | 2 | 169487958 | 2 | 3.028309 |
| rs496550       | ABCB11    | 2 | 169487958 | 5 | 0.614208 |
| rs495714       | ABCB11    | 2 | 169488010 | 4 | 0.040763 |
| rs495714       | ABCB11    | 2 | 169488010 | 5 | 0.405351 |
| rs495714       | ABCB11    | 2 | 169488010 | 7 | 1.75788  |
| rs473351       | ABCB11    | 2 | 169488142 | 7 | 0.816112 |
| rs473351       | ABCB11    | 2 | 169488142 | 2 | 4.056575 |
| rs497692       | ABCB11    | 2 | 169497262 | 8 | 4.071955 |
| SNP2-169533229 | ABCB11    | 2 | 169533229 | 7 | 0.244113 |
| rs2287622      | ABCB11    | 2 | 169538574 | 3 | 1.076916 |

|                |           |   |           |   |          |
|----------------|-----------|---|-----------|---|----------|
| rs2287622      | ABCB11    | 2 | 169538574 | 7 | 1.394536 |
| rs7563233      | ABCB11    | 2 | 169550992 | 7 | 0.300443 |
| rs3732040      | DHRS9     | 2 | 169660776 | 7 | 0.866632 |
| rs831043       | LRP2      | 2 | 169811582 | 5 | 0.808413 |
| rs830994       | LRP2      | 2 | 169837774 | 3 | 2.505153 |
| rs1879466      | BBS5      | 2 | 170044270 | 1 | 3.504225 |
| rs28763868     | KBTBD10   | 2 | 170075345 | 4 | 0.543336 |
| rs16857030     | FASTKD1   | 2 | 170111352 | 4 | 0.104118 |
| rs16857030     | FASTKD1   | 2 | 170111352 | 2 | 4.520776 |
| rs3820952      | LOC129881 | 2 | 170259085 | 8 | 2.100422 |
| rs3820952      | LOC129881 | 2 | 170259085 | 5 | 0.031912 |
| rs3820952      | LOC129881 | 2 | 170259085 | 2 | 0.848117 |
| rs3820952      | LOC129881 | 2 | 170259085 | 1 | 2.012238 |
| rs3820952      | LOC129881 | 2 | 170259085 | 7 | 1.227033 |
| rs3820952      | LOC129881 | 2 | 170259085 | 3 | 1.213351 |
| rs3820952      | LOC129881 | 2 | 170259085 | 4 | 2.92291  |
| rs10190853     | NULL      | 2 | 170381089 | 1 | 3.443672 |
| rs10190853     | NULL      | 2 | 170381089 | 3 | 0.054843 |
| rs2161916      | MYO3B     | 2 | 170782133 | 3 | 0.549498 |
| rs2161916      | MYO3B     | 2 | 170782133 | 1 | 0.761237 |
| rs2161916      | MYO3B     | 2 | 170782133 | 4 | 0.002742 |
| rs2161916      | MYO3B     | 2 | 170782133 | 6 | 0.289732 |
| rs2161916      | MYO3B     | 2 | 170782133 | 2 | 2.083221 |
| rs17694708     | LOC643684 | 2 | 171343152 | 1 | 4.020464 |
| rs17694708     | LOC643684 | 2 | 171343152 | 4 | 0.820798 |
| rs17694708     | LOC643684 | 2 | 171343152 | 5 | 0.283013 |
| rs3764916      | LOC285141 | 2 | 171357648 | 7 | 0.748224 |
| rs769395       | GAD1      | 2 | 171425049 | 1 | 1.702344 |
| rs13023973     | METTL8    | 2 | 171896614 | 1 | 0.251011 |
| SNP2-172017897 | C2orf37   | 2 | 172017897 | 4 | 0.995256 |
| rs3795996      | C2orf37   | 2 | 172046220 | 4 | 0.823389 |
| rs1047255      | CYBRD1    | 2 | 172120254 | 3 | 1.505349 |
| rs2542938      | CYBRD1    | 2 | 172121513 | 2 | 5.123632 |
| rs11757        | SLC25A12  | 2 | 172349291 | 1 | 0.025385 |
| rs11757        | SLC25A12  | 2 | 172349291 | 2 | 4.117798 |
| rs11757        | SLC25A12  | 2 | 172349291 | 7 | 0.31343  |
| rs788172       | DLX1      | 2 | 172661684 | 3 | 0.393922 |
| rs788172       | DLX1      | 2 | 172661684 | 7 | 0.723565 |
| rs788173       | DLX1      | 2 | 172661706 | 7 | 1.252899 |
| rs743605       | DLX2      | 2 | 172675548 | 1 | 1.33299  |
| rs743605       | DLX2      | 2 | 172675548 | 3 | 0.091848 |
| rs743605       | DLX2      | 2 | 172675548 | 7 | 0.610737 |
| rs17286988     | ITGA6     | 2 | 173077246 | 8 | 0.523229 |
| rs17286988     | ITGA6     | 2 | 173077246 | 3 | 0.087836 |
| rs11887008     | ZAK       | 2 | 173799334 | 1 | 2.536469 |
| SNP2-173839638 | ZAK       | 2 | 173839638 | 3 | 0.056042 |
| rs3739153      | OLA1      | 2 | 174645524 | 4 | 2.661818 |

|            |           |   |           |   |          |
|------------|-----------|---|-----------|---|----------|
| rs3739153  | OLA1      | 2 | 174645524 | 5 | 0.286979 |
| rs3739153  | OLA1      | 2 | 174645524 | 8 | 3.949429 |
| rs3739153  | OLA1      | 2 | 174645524 | 3 | 0.636957 |
| rs3739153  | OLA1      | 2 | 174645524 | 1 | 3.511314 |
| rs6737629  | OLA1      | 2 | 174647414 | 3 | 0.205568 |
| rs6737629  | OLA1      | 2 | 174647414 | 5 | 0.005058 |
| rs6737629  | OLA1      | 2 | 174647414 | 4 | 0.1551   |
| rs6737629  | OLA1      | 2 | 174647414 | 7 | 0.369368 |
| rs6737629  | OLA1      | 2 | 174647414 | 1 | 5.235405 |
| rs17316500 | OLA1      | 2 | 174647433 | 7 | 0.976892 |
| rs10930663 | GPR155    | 2 | 175005606 | 2 | 2.95394  |
| rs10930663 | GPR155    | 2 | 175005606 | 3 | 0.23287  |
| rs10930663 | GPR155    | 2 | 175005606 | 1 | 0.208376 |
| GA020792   | ATP5G3    | 2 | 175754413 | 5 | 0.785606 |
| rs12621733 | KIAA1715  | 2 | 176499888 | 2 | 5.319823 |
| rs12622749 | KIAA1715  | 2 | 176501175 | 2 | 3.613944 |
| rs12622783 | KIAA1715  | 2 | 176501262 | 2 | 3.766518 |
| rs863678   | HOXD11    | 2 | 176682350 | 8 | 1.085506 |
| rs6745764  | HOXD11    | 2 | 176682368 | 3 | 0.158427 |
| rs11694628 | LOC129841 | 2 | 176815802 | 3 | 1.889487 |
| rs2305161  | MTX2      | 2 | 176842418 | 5 | 0.857024 |
| rs2305161  | MTX2      | 2 | 176842418 | 3 | 2.116681 |
| rs3821004  | TTC30A    | 2 | 178188309 | 7 | 0.620025 |
| rs16865448 | TTC30A    | 2 | 178188778 | 7 | 0.606308 |
| rs16865449 | TTC30A    | 2 | 178189018 | 7 | 0.032313 |
| rs13034886 | PDE11A    | 2 | 178201547 | 6 | 1.124391 |
| rs13034886 | PDE11A    | 2 | 178201547 | 8 | 0.205126 |
| rs13034886 | PDE11A    | 2 | 178201547 | 7 | 0.386569 |
| rs6734528  | PDE11A    | 2 | 178201977 | 8 | 6.853177 |
| rs6734528  | PDE11A    | 2 | 178201977 | 6 | 0.853354 |
| rs6734528  | PDE11A    | 2 | 178201977 | 7 | 3.260281 |
| rs6734683  | PDE11A    | 2 | 178202258 | 8 | 3.749741 |
| rs6734683  | PDE11A    | 2 | 178202258 | 6 | 1.833811 |
| rs6734683  | PDE11A    | 2 | 178202258 | 7 | 0.57899  |
| rs6720891  | PDE11A    | 2 | 178390849 | 1 | 0.351756 |
| rs6720891  | PDE11A    | 2 | 178390849 | 2 | 1.667354 |
| rs6720891  | PDE11A    | 2 | 178390849 | 5 | 0.083313 |
| rs1435573  | PDE11A    | 2 | 178644619 | 8 | 0.502873 |
| rs1435573  | PDE11A    | 2 | 178644619 | 6 | 4.254507 |
| rs1435573  | PDE11A    | 2 | 178644619 | 3 | 0.20703  |
| rs1435573  | PDE11A    | 2 | 178644619 | 1 | 5.514016 |
| rs12478760 | OSBPL6    | 2 | 178893297 | 3 | 0.887103 |
| rs12478760 | OSBPL6    | 2 | 178893297 | 1 | 2.810145 |
| rs3997878  | PRKRA     | 2 | 179004872 | 7 | 4.454435 |
| rs3997878  | PRKRA     | 2 | 179004872 | 4 | 4.670849 |
| rs3997878  | PRKRA     | 2 | 179004872 | 1 | 4.082478 |
| rs3997878  | PRKRA     | 2 | 179004872 | 3 | 4.927345 |



|                |         |   |           |   |          |
|----------------|---------|---|-----------|---|----------|
| SNP2-179034062 | DFNB59  | 2 | 179034062 | 5 | 3.752167 |
| rs3813250      | TTN     | 2 | 179104204 | 5 | 4.719172 |
| SNP2-179109986 | TTN     | 2 | 179109986 | 5 | 4.157229 |
| SNP2-179118528 | TTN     | 2 | 179118528 | 2 | 5.179916 |
| rs11694623     | TTN     | 2 | 179121698 | 6 | 5.094126 |
| rs3813247      | TTN     | 2 | 179138306 | 5 | 0.82267  |
| SNP2-179141467 | TTN     | 2 | 179141467 | 5 | 4.20216  |
| rs3813245      | TTN     | 2 | 179142385 | 5 | 0.046536 |
| rs12464787     | TTN     | 2 | 179148275 | 7 | 1.355361 |
| rs12464787     | TTN     | 2 | 179148275 | 2 | 4.189184 |
| rs4894029      | TTN     | 2 | 179156094 | 5 | 4.461214 |
| rs2042996      | TTN     | 2 | 179159666 | 5 | 2.881787 |
| rs2163009      | TTN     | 2 | 179163453 | 5 | 3.351889 |
| rs2303831      | TTN     | 2 | 179180938 | 5 | 0.082058 |
| rs2288566      | TTN     | 2 | 179182711 | 5 | 0.10689  |
| rs6723526      | TTN     | 2 | 179206287 | 1 | 5.931221 |
| rs6723526      | TTN     | 2 | 179206287 | 3 | 0.542266 |
| rs2288563      | TTN     | 2 | 179207775 | 5 | 0.17576  |
| rs2742344      | TTN     | 2 | 179277645 | 5 | 0.396564 |
| rs2562839      | TTN     | 2 | 179286975 | 5 | 0.045637 |
| rs2562836      | TTN     | 2 | 179288067 | 5 | 0.598259 |
| SNP2-179291098 | TTN     | 2 | 179291098 | 2 | 1.880692 |
| rs746578       | TTN     | 2 | 179313425 | 5 | 3.176438 |
| rs922984       | TTN     | 2 | 179324132 | 5 | 3.514907 |
| rs2291311      | TTN     | 2 | 179337706 | 5 | 0.584859 |
| rs2291312      | TTN     | 2 | 179339459 | 5 | 0.977322 |
| rs2306636      | TTN     | 2 | 179343181 | 5 | 0.079342 |
| SNP2-179346106 | TTN     | 2 | 179346106 | 5 | 0.90705  |
| SNP2-179358653 | TTN     | 2 | 179358653 | 7 | 0.231616 |
| SNP2-179358653 | TTN     | 2 | 179358653 | 3 | 0.420262 |
| rs3749123      | ZNF385B | 2 | 180016028 | 1 | 0.541833 |
| rs2367796      | ZNF385B | 2 | 180016273 | 5 | 0.853907 |
| rs10490691     | ITGA4   | 2 | 182109361 | 4 | 0.961739 |
| rs10490691     | ITGA4   | 2 | 182109361 | 5 | 4.606908 |
| rs12614187     | CERKL   | 2 | 182110736 | 5 | 3.289874 |
| rs12614187     | CERKL   | 2 | 182110736 | 4 | 1.60143  |
| SNP2-182489119 | SSFA2   | 2 | 182489119 | 7 | 0.263216 |
| rs6729801      | DNAJC10 | 2 | 183293000 | 1 | 2.440199 |
| rs6729801      | DNAJC10 | 2 | 183293000 | 3 | 0.529591 |
| rs192618       | DNAJC10 | 2 | 183335749 | 7 | 0.588282 |
| rs9288088      | NCKAP1  | 2 | 183507803 | 5 | 0.125622 |
| rs9288088      | NCKAP1  | 2 | 183507803 | 8 | 0.033982 |
| rs9288088      | NCKAP1  | 2 | 183507803 | 3 | 0.713275 |
| rs9288088      | NCKAP1  | 2 | 183507803 | 6 | 3.517192 |
| rs9288088      | NCKAP1  | 2 | 183507803 | 1 | 7.908812 |
| rs2675117      | KRT8P10 | 2 | 183645160 | 1 | 0.238928 |
| rs2675117      | KRT8P10 | 2 | 183645160 | 2 | 0.348878 |

|                |           |   |           |   |          |
|----------------|-----------|---|-----------|---|----------|
| rs2675117      | KRT8P10   | 2 | 183645160 | 6 | 0.148553 |
| rs2368335      | DUSP19    | 2 | 183669913 | 1 | 0.633379 |
| rs2705730      | DUSP19    | 2 | 183671935 | 8 | 0.028561 |
| rs2705730      | DUSP19    | 2 | 183671935 | 6 | 1.790619 |
| rs2705730      | DUSP19    | 2 | 183671935 | 3 | 0.221162 |
| rs2944346      | DUSP19    | 2 | 183672414 | 1 | 0.967357 |
| rs2944346      | DUSP19    | 2 | 183672414 | 6 | 0.121806 |
| rs898946       | LOC129402 | 2 | 183833818 | 2 | 2.298425 |
| rs898946       | LOC129402 | 2 | 183833818 | 7 | 0.441845 |
| rs898946       | LOC129402 | 2 | 183833818 | 5 | 1.197585 |
| rs12477430     | ZNF804A   | 2 | 185510608 | 7 | 2.020941 |
| rs17826534     | FLJ44048  | 2 | 186379602 | 6 | 0.379997 |
| rs17826534     | FLJ44048  | 2 | 186379602 | 5 | 0.001441 |
| rs17826534     | FLJ44048  | 2 | 186379602 | 7 | 0.958088 |
| rs17826534     | FLJ44048  | 2 | 186379602 | 1 | 5.456369 |
| rs17826534     | FLJ44048  | 2 | 186379602 | 3 | 0.653644 |
| rs1862066      | FLJ44048  | 2 | 186380157 | 7 | 0.03782  |
| rs1862066      | FLJ44048  | 2 | 186380157 | 3 | 0.345137 |
| rs1862066      | FLJ44048  | 2 | 186380157 | 6 | 0.792712 |
| rs1862066      | FLJ44048  | 2 | 186380157 | 1 | 3.906223 |
| rs1862066      | FLJ44048  | 2 | 186380157 | 5 | 0.180137 |
| rs4666690      | FLJ44048  | 2 | 186381142 | 5 | 0.406367 |
| rs4666690      | FLJ44048  | 2 | 186381142 | 3 | 0.680814 |
| rs4666690      | FLJ44048  | 2 | 186381142 | 1 | 0.368351 |
| rs13026081     | KIAA1946  | 2 | 187334583 | 7 | 0.321521 |
| rs13026081     | KIAA1946  | 2 | 187334583 | 4 | 1.201574 |
| rs13026081     | KIAA1946  | 2 | 187334583 | 6 | 0.059284 |
| rs13026081     | KIAA1946  | 2 | 187334583 | 3 | 0.961051 |
| rs2595381      | KIAA1946  | 2 | 187335812 | 4 | 2.899248 |
| rs2682851      | KIAA1946  | 2 | 187336567 | 4 | 0.462303 |
| rs10195758     | ZSWIM2    | 2 | 187401400 | 4 | 0.838286 |
| rs696092       | CALCRL    | 2 | 187918459 | 3 | 0.446958 |
| rs696092       | CALCRL    | 2 | 187918459 | 5 | 1.152862 |
| rs696092       | CALCRL    | 2 | 187918459 | 2 | 2.85221  |
| rs696092       | CALCRL    | 2 | 187918459 | 6 | 1.006551 |
| rs3771095      | CALCRL    | 2 | 187919357 | 7 | 0.340826 |
| rs3771095      | CALCRL    | 2 | 187919357 | 5 | 0.945727 |
| rs3771095      | CALCRL    | 2 | 187919357 | 2 | 2.656327 |
| rs8176629      | TFPI      | 2 | 188039766 | 6 | 1.33389  |
| rs8273         | GULP1     | 2 | 189168798 | 4 | 1.300572 |
| rs13914        | COL5A2    | 2 | 189605876 | 1 | 4.9489   |
| rs10197596     | COL5A2    | 2 | 189612478 | 3 | 1.002546 |
| rs1225099      | ANKAR     | 2 | 190310758 | 3 | 0.55729  |
| SNP2-190328461 | OSGEPL1   | 2 | 190328461 | 3 | 0.234212 |
| SNP2-190328461 | OSGEPL1   | 2 | 190328461 | 2 | 3.578589 |
| rs2289405      | ORMDL1    | 2 | 190344284 | 1 | 4.029761 |
| rs2289405      | ORMDL1    | 2 | 190344284 | 6 | 6.135648 |

|                |           |   |           |   |          |
|----------------|-----------|---|-----------|---|----------|
| rs6942         | ORMDL1    | 2 | 190344656 | 6 | 0.742391 |
| rs6942         | ORMDL1    | 2 | 190344656 | 2 | 7.099494 |
| rs6942         | ORMDL1    | 2 | 190344656 | 1 | 0.244986 |
| rs5742933      | PMS1      | 2 | 190357561 | 6 | 3.75738  |
| rs5742933      | PMS1      | 2 | 190357561 | 1 | 3.548699 |
| rs5742933      | PMS1      | 2 | 190357561 | 4 | 1.086524 |
| SNP2-190772998 | MGC13057  | 2 | 190772998 | 3 | 0.138197 |
| SNP2-190772998 | MGC13057  | 2 | 190772998 | 8 | 0.007279 |
| SNP2-190772998 | MGC13057  | 2 | 190772998 | 4 | 5.178123 |
| rs11542        | HIBCH     | 2 | 190777934 | 3 | 0.434031 |
| rs11542        | HIBCH     | 2 | 190777934 | 8 | 0.309357 |
| rs11542        | HIBCH     | 2 | 190777934 | 4 | 0.867473 |
| rs11542        | HIBCH     | 2 | 190777934 | 7 | 0.164442 |
| rs2293765      | NAB1      | 2 | 191229090 | 7 | 1.438456 |
| rs2293765      | NAB1      | 2 | 191229090 | 6 | 5.182104 |
| rs2293765      | NAB1      | 2 | 191229090 | 4 | 2.535206 |
| rs2293765      | NAB1      | 2 | 191229090 | 1 | 3.90613  |
| rs2293765      | NAB1      | 2 | 191229090 | 3 | 0.566354 |
| rs1546648      | GLS       | 2 | 191536448 | 4 | 0.798268 |
| rs13035504     | GLS       | 2 | 191537598 | 2 | 5.023121 |
| rs13035504     | GLS       | 2 | 191537598 | 1 | 0.325984 |
| rs3088307      | GLS       | 2 | 191537657 | 3 | 1.041273 |
| rs3088307      | GLS       | 2 | 191537657 | 2 | 3.720221 |
| rs3088307      | GLS       | 2 | 191537657 | 7 | 13.87306 |
| rs13035710     | LOC729245 | 2 | 192248196 | 2 | 5.200498 |
| rs1489802      | DNAH7     | 2 | 196499521 | 7 | 0.761362 |
| rs1489802      | DNAH7     | 2 | 196499521 | 4 | 1.609864 |
| rs1489802      | DNAH7     | 2 | 196499521 | 5 | 1.867865 |
| SNP2-196530249 | DNAH7     | 2 | 196530249 | 1 | 4.639478 |
| SNP2-196530249 | DNAH7     | 2 | 196530249 | 5 | 0.489153 |
| rs6719500      | DNAH7     | 2 | 196533647 | 3 | 1.862775 |
| rs6434811      | DNAH7     | 2 | 196574665 | 3 | 0.157894 |
| SNP2-196600940 | DNAH7     | 2 | 196600940 | 8 | 2.320288 |
| rs7577213      | HECW2     | 2 | 197165486 | 1 | 4.667533 |
| rs7577213      | HECW2     | 2 | 197165486 | 3 | 0.158077 |
| SNP2-197229995 | FLJ39660  | 2 | 197229995 | 6 | 0.673354 |
| SNP2-197229995 | FLJ39660  | 2 | 197229995 | 8 | 2.798808 |
| SNP2-197229995 | FLJ39660  | 2 | 197229995 | 4 | 4.280695 |
| rs17271281     | FLJ39660  | 2 | 197249541 | 1 | 5.798978 |
| rs3795920      | PGAP1     | 2 | 197411321 | 8 | 0.732041 |
| rs3795920      | PGAP1     | 2 | 197411321 | 6 | 3.699309 |
| rs3795920      | PGAP1     | 2 | 197411321 | 4 | 0.759717 |
| rs3754822      | COQ10B    | 2 | 198035559 | 1 | 5.52529  |
| rs3792157      | MOBKL3    | 2 | 198125104 | 1 | 4.699039 |
| rs7592344      | MARS2     | 2 | 198280706 | 4 | 0.942238 |
| rs1064213      | PLCL1     | 2 | 198658485 | 8 | 0.692847 |
| rs16832051     | C2orf60   | 2 | 200502029 | 6 | 0.021342 |

|                |          |   |           |   |          |
|----------------|----------|---|-----------|---|----------|
| rs16832051     | C2orf60  | 2 | 200502029 | 3 | 0.208074 |
| rs6435036      | C2orf60  | 2 | 200503816 | 3 | 0.828807 |
| rs6435036      | C2orf60  | 2 | 200503816 | 7 | 1.937897 |
| rs6435036      | C2orf60  | 2 | 200503816 | 4 | 0.658925 |
| rs6435036      | C2orf60  | 2 | 200503816 | 6 | 2.985106 |
| rs6435036      | C2orf60  | 2 | 200503816 | 5 | 0.184883 |
| rs2292309      | C2orf47  | 2 | 200528600 | 5 | 0.253904 |
| rs281766       | C2orf47  | 2 | 200528750 | 2 | 4.638083 |
| rs281766       | C2orf47  | 2 | 200528750 | 4 | 0.83616  |
| SNP2-201234575 | AOX1     | 2 | 201234575 | 3 | 2.608826 |
| SNP2-201476483 | NIF3L1   | 2 | 201476483 | 7 | 0.334046 |
| SNP2-201476483 | NIF3L1   | 2 | 201476483 | 5 | 0.788304 |
| SNP2-201476483 | NIF3L1   | 2 | 201476483 | 1 | 4.654081 |
| rs3900115      | CASP10   | 2 | 201758922 | 7 | 1.024371 |
| rs3900115      | CASP10   | 2 | 201758922 | 4 | 0.563623 |
| rs3900115      | CASP10   | 2 | 201758922 | 1 | 3.757095 |
| rs3900115      | CASP10   | 2 | 201758922 | 8 | 7.00218  |
| rs13010627     | CASP10   | 2 | 201782343 | 5 | 4.396362 |
| rs13010627     | CASP10   | 2 | 201782343 | 2 | 4.596637 |
| rs13006529     | CASP10   | 2 | 201790704 | 8 | 1.568922 |
| rs13006529     | CASP10   | 2 | 201790704 | 4 | 0.170233 |
| rs13006529     | CASP10   | 2 | 201790704 | 1 | 5.722058 |
| rs13006529     | CASP10   | 2 | 201790704 | 7 | 0.604976 |
| rs3769823      | CASP8    | 2 | 201831240 | 8 | 0.704284 |
| rs3769823      | CASP8    | 2 | 201831240 | 7 | 0.157978 |
| rs3769823      | CASP8    | 2 | 201831240 | 5 | 2.931723 |
| rs3769823      | CASP8    | 2 | 201831240 | 1 | 4.136405 |
| rs3769823      | CASP8    | 2 | 201831240 | 6 | 0.035648 |
| rs1045485      | CASP8    | 2 | 201857834 | 3 | 0.105023 |
| rs1045487      | CASP8    | 2 | 201857941 | 6 | 0.3985   |
| rs1045487      | CASP8    | 2 | 201857941 | 4 | 0.244089 |
| rs1045494      | CASP8    | 2 | 201860026 | 6 | 0.991823 |
| rs1045494      | CASP8    | 2 | 201860026 | 4 | 0.040832 |
| rs1035142      | ALS2CR12 | 2 | 201861323 | 5 | 0.226702 |
| rs1035142      | ALS2CR12 | 2 | 201861323 | 6 | 1.646558 |
| rs1035142      | ALS2CR12 | 2 | 201861323 | 1 | 2.918061 |
| rs700635       | ALS2CR12 | 2 | 201861470 | 7 | 0.825545 |
| rs700635       | ALS2CR12 | 2 | 201861470 | 5 | 0.471065 |
| rs700635       | ALS2CR12 | 2 | 201861470 | 1 | 5.744094 |
| rs700635       | ALS2CR12 | 2 | 201861470 | 8 | 0.622243 |
| rs700635       | ALS2CR12 | 2 | 201861470 | 6 | 1.69322  |
| rs700636       | ALS2CR12 | 2 | 201861497 | 4 | 3.524489 |
| rs17468277     | ALS2CR12 | 2 | 201862445 | 3 | 0.029095 |
| rs13014235     | ALS2CR12 | 2 | 201923737 | 1 | 7.710589 |
| rs13014235     | ALS2CR12 | 2 | 201923737 | 5 | 0.052927 |
| rs13014235     | ALS2CR12 | 2 | 201923737 | 8 | 2.720005 |
| rs13014235     | ALS2CR12 | 2 | 201923737 | 6 | 0.129111 |

|            |           |   |           |   |          |
|------------|-----------|---|-----------|---|----------|
| rs13014235 | ALS2CR12  | 2 | 201923737 | 7 | 0.12307  |
| rs13014235 | ALS2CR12  | 2 | 201923737 | 3 | 0.550304 |
| rs10804117 | ALS2CR11  | 2 | 202118545 | 1 | 3.97189  |
| rs3754932  | MPP4      | 2 | 202218059 | 1 | 0.245023 |
| rs3754932  | MPP4      | 2 | 202218059 | 4 | 0.053888 |
| rs10931969 | MPP4      | 2 | 202266932 | 3 | 1.132915 |
| rs10931969 | MPP4      | 2 | 202266932 | 4 | 0.00071  |
| rs10931969 | MPP4      | 2 | 202266932 | 5 | 1.319494 |
| rs11300    | ALS2      | 2 | 202273815 | 7 | 0.407971 |
| rs3219168  | ALS2      | 2 | 202284066 | 4 | 0.838707 |
| rs3219168  | ALS2      | 2 | 202284066 | 5 | 0.626965 |
| rs3219168  | ALS2      | 2 | 202284066 | 3 | 2.010183 |
| rs4673222  | FZD7      | 2 | 202610155 | 6 | 6.283401 |
| rs10221698 | FLJ39061  | 2 | 202647899 | 6 | 3.848917 |
| rs10221698 | FLJ39061  | 2 | 202647899 | 7 | 8.4919   |
| rs10221698 | FLJ39061  | 2 | 202647899 | 1 | 4.187363 |
| rs10221698 | FLJ39061  | 2 | 202647899 | 3 | 2.5223   |
| rs10221698 | FLJ39061  | 2 | 202647899 | 4 | 2.988384 |
| rs10221698 | FLJ39061  | 2 | 202647899 | 5 | 2.019799 |
| rs13015146 | LOC339809 | 2 | 202770348 | 7 | 0.219294 |
| rs13015146 | LOC339809 | 2 | 202770348 | 4 | 0.61914  |
| rs13015146 | LOC339809 | 2 | 202770348 | 3 | 0.876112 |
| rs6435156  | BMPR2     | 2 | 203133720 | 4 | 1.803341 |
| rs16839311 | ALS2CR13  | 2 | 203339801 | 5 | 0.131426 |
| rs7597959  | LOC442064 | 2 | 203346118 | 3 | 2.121886 |
| rs7597959  | LOC442064 | 2 | 203346118 | 5 | 2.409591 |
| rs7597959  | LOC442064 | 2 | 203346118 | 6 | 2.150215 |
| rs3181113  | CD28      | 2 | 204310155 | 4 | 1.078658 |
| rs3181113  | CD28      | 2 | 204310155 | 3 | 1.297213 |
| rs4675379  | ICOS      | 2 | 204534340 | 4 | 0.746087 |
| rs4675379  | ICOS      | 2 | 204534340 | 1 | 1.496917 |
| rs236843   | PARD3B    | 2 | 205538236 | 4 | 0.78196  |
| rs236843   | PARD3B    | 2 | 205538236 | 8 | 4.212823 |
| rs236843   | PARD3B    | 2 | 205538236 | 7 | 0.59604  |
| rs236843   | PARD3B    | 2 | 205538236 | 1 | 5.7244   |
| rs3732083  | GPR1      | 2 | 206749298 | 3 | 1.27525  |
| rs3732083  | GPR1      | 2 | 206749298 | 4 | 1.87876  |
| rs3732083  | GPR1      | 2 | 206749298 | 8 | 4.340097 |
| rs3732083  | GPR1      | 2 | 206749298 | 1 | 1.898603 |
| rs3732082  | GPR1      | 2 | 206749686 | 3 | 1.236983 |
| rs3755227  | GPR1      | 2 | 206750178 | 3 | 0.485504 |
| rs3755227  | GPR1      | 2 | 206750178 | 7 | 1.41952  |
| rs2287633  | MDH1B     | 2 | 207311135 | 4 | 4.050897 |
| rs2287632  | MDH1B     | 2 | 207311466 | 4 | 0.301158 |
| rs2287631  | MDH1B     | 2 | 207311479 | 4 | 0.637075 |
| rs13420911 | CPO       | 2 | 207528521 | 5 | 2.673723 |
| rs13420911 | CPO       | 2 | 207528521 | 1 | 2.138303 |

|                |           |   |           |   |          |
|----------------|-----------|---|-----------|---|----------|
| rs13420911     | CPO       | 2 | 207528521 | 7 | 2.116385 |
| rs11903403     | CPO       | 2 | 207532629 | 5 | 0.5429   |
| rs11903403     | CPO       | 2 | 207532629 | 6 | 0.405189 |
| rs11903403     | CPO       | 2 | 207532629 | 1 | 0.045414 |
| SNP2-207535465 | CPO       | 2 | 207535465 | 6 | 0.134616 |
| rs7582305      | CPO       | 2 | 207542228 | 2 | 3.785123 |
| rs7582305      | CPO       | 2 | 207542228 | 4 | 0.603199 |
| rs7582305      | CPO       | 2 | 207542228 | 3 | 0.802152 |
| rs7582305      | CPO       | 2 | 207542228 | 7 | 0.844757 |
| rs971493       | LOC646091 | 2 | 208710281 | 5 | 2.521079 |
| rs971493       | LOC646091 | 2 | 208710281 | 2 | 2.642201 |
| rs3820900      | PTH2R     | 2 | 209066272 | 3 | 0.014328 |
| rs3820900      | PTH2R     | 2 | 209066272 | 1 | 1.284103 |
| rs1057390      | PTH2R     | 2 | 209067196 | 7 | 0.750957 |
| rs1057392      | PTH2R     | 2 | 209067307 | 1 | 3.644591 |
| rs10198749     | LOC402116 | 2 | 209752729 | 7 | 0.98381  |
| rs10198749     | LOC402116 | 2 | 209752729 | 5 | 0.929523 |
| rs6435517      | LOC402116 | 2 | 209753538 | 2 | 4.944908 |
| rs6435517      | LOC402116 | 2 | 209753538 | 6 | 4.246749 |
| rs6435517      | LOC402116 | 2 | 209753538 | 8 | 1.087263 |
| rs6720659      | MAP2      | 2 | 210265625 | 1 | 5.920699 |
| rs6720659      | MAP2      | 2 | 210265625 | 5 | 0.717905 |
| rs6720659      | MAP2      | 2 | 210265625 | 4 | 0.245101 |
| rs741007       | MAP2      | 2 | 210265787 | 1 | 4.508288 |
| rs741007       | MAP2      | 2 | 210265787 | 4 | 0.293048 |
| rs741007       | MAP2      | 2 | 210265787 | 5 | 0.2832   |
| rs741006       | MAP2      | 2 | 210266407 | 4 | 0.935171 |
| rs741006       | MAP2      | 2 | 210266407 | 1 | 5.466052 |
| rs741006       | MAP2      | 2 | 210266407 | 5 | 0.153496 |
| rs2239672      | MAP2      | 2 | 210268205 | 1 | 4.970853 |
| rs2239672      | MAP2      | 2 | 210268205 | 5 | 0.681175 |
| rs2239672      | MAP2      | 2 | 210268205 | 4 | 0.728329 |
| rs16843618     | MAP2      | 2 | 210304065 | 4 | 0.776778 |
| rs16843618     | MAP2      | 2 | 210304065 | 5 | 0.56812  |
| rs16843618     | MAP2      | 2 | 210304065 | 1 | 8.441502 |
| SNP2-210613439 | C2orf67   | 2 | 210613439 | 1 | 6.650236 |
| rs2286963      | ACADL     | 2 | 210768295 | 5 | 0.183383 |
| rs2286963      | ACADL     | 2 | 210768295 | 6 | 0.076078 |
| rs10932334     | LANCL1    | 2 | 211049594 | 5 | 0.499082 |
| rs10932334     | LANCL1    | 2 | 211049594 | 1 | 5.511351 |
| rs10932334     | LANCL1    | 2 | 211049594 | 7 | 0.26347  |
| rs10932334     | LANCL1    | 2 | 211049594 | 3 | 7.040526 |
| rs2287599      | CPS1      | 2 | 211189502 | 5 | 0.684235 |
| rs2287599      | CPS1      | 2 | 211189502 | 3 | 0.844059 |
| SNP2-211248752 | CPS1      | 2 | 211248752 | 2 | 4.631793 |
| rs10932349     | CPS1      | 2 | 211251334 | 5 | 0.692757 |
| rs6709554      | IKZF2     | 2 | 213720753 | 1 | 4.273325 |

|            |        |   |           |   |          |
|------------|--------|---|-----------|---|----------|
| rs6709554  | IKZF2  | 2 | 213720753 | 5 | 2.288134 |
| rs6709554  | IKZF2  | 2 | 213720753 | 8 | 1.614303 |
| rs2042791  | SPAG16 | 2 | 214435466 | 1 | 3.193182 |
| rs2042791  | SPAG16 | 2 | 214435466 | 3 | 1.906554 |
| rs12623569 | SPAG16 | 2 | 214502988 | 1 | 3.60935  |
| rs726070   | ABCA12 | 2 | 215521576 | 2 | 3.352015 |
| rs17501532 | ABCA12 | 2 | 215604942 | 2 | 1.137906 |
| rs17501837 | ABCA12 | 2 | 215610019 | 8 | 0.511363 |
| rs17501837 | ABCA12 | 2 | 215610019 | 3 | 1.11984  |
| rs1263     | FN1    | 2 | 215933588 | 3 | 1.34712  |
| rs1263     | FN1    | 2 | 215933588 | 2 | 3.852171 |
| rs1263     | FN1    | 2 | 215933588 | 4 | 0.860284 |
| rs1264     | FN1    | 2 | 215933597 | 6 | 0.196604 |
| rs7596677  | FN1    | 2 | 215981152 | 1 | 3.580598 |
| rs7596677  | FN1    | 2 | 215981152 | 5 | 0.999081 |
| rs7596677  | FN1    | 2 | 215981152 | 3 | 0.18084  |
| rs2289202  | FN1    | 2 | 216006329 | 6 | 0.829089 |
| rs876771   | 4-Mar  | 2 | 216856662 | 7 | 0.085428 |
| rs11575194 | IGFBP5 | 2 | 217251973 | 3 | 0.398849 |
| rs918949   | TNS1   | 2 | 218382942 | 5 | 0.028221 |
| rs918949   | TNS1   | 2 | 218382942 | 2 | 0.587769 |
| rs918949   | TNS1   | 2 | 218382942 | 1 | 0.381401 |
| rs918949   | TNS1   | 2 | 218382942 | 6 | 1.443653 |
| rs12694422 | TNS1   | 2 | 218390719 | 6 | 0.820089 |
| rs12694422 | TNS1   | 2 | 218390719 | 7 | 0.370146 |
| rs12694422 | TNS1   | 2 | 218390719 | 1 | 3.240598 |
| rs12694422 | TNS1   | 2 | 218390719 | 5 | 0.74818  |
| rs3796026  | TNS1   | 2 | 218391016 | 1 | 3.576997 |
| rs3796026  | TNS1   | 2 | 218391016 | 6 | 2.899226 |
| rs3796026  | TNS1   | 2 | 218391016 | 7 | 0.912937 |
| rs3796026  | TNS1   | 2 | 218391016 | 5 | 0.990172 |
| rs2571445  | TNS1   | 2 | 218391399 | 7 | 0.672094 |
| rs2571442  | TNS1   | 2 | 218391502 | 1 | 1.574877 |
| rs2571442  | TNS1   | 2 | 218391502 | 7 | 0.080777 |
| rs2571442  | TNS1   | 2 | 218391502 | 5 | 0.344819 |
| rs3796028  | TNS1   | 2 | 218403347 | 1 | 0.654756 |
| rs3796028  | TNS1   | 2 | 218403347 | 7 | 0.663014 |
| rs1004814  | TNS1   | 2 | 218420551 | 7 | 3.112992 |
| rs1004814  | TNS1   | 2 | 218420551 | 2 | 2.734918 |
| rs1004814  | TNS1   | 2 | 218420551 | 6 | 0.881849 |
| rs1364641  | TNS1   | 2 | 218420851 | 7 | 0.987286 |
| rs1364641  | TNS1   | 2 | 218420851 | 6 | 0.142298 |
| rs1364641  | TNS1   | 2 | 218420851 | 2 | 4.371891 |
| rs1364642  | TNS1   | 2 | 218420971 | 6 | 0.917022 |
| rs3796031  | TNS1   | 2 | 218421163 | 7 | 0.562651 |
| rs3796031  | TNS1   | 2 | 218421163 | 6 | 0.40702  |
| rs3796033  | TNS1   | 2 | 218421527 | 6 | 0.238689 |

|            |         |   |           |   |          |
|------------|---------|---|-----------|---|----------|
| rs3796033  | TNS1    | 2 | 218421527 | 7 | 0.595484 |
| rs4674259  | IL8RB   | 2 | 218699250 | 6 | 1.455295 |
| rs4674259  | IL8RB   | 2 | 218699250 | 1 | 1.69074  |
| rs1126580  | IL8RB   | 2 | 218709211 | 1 | 0.655029 |
| rs2292555  | TMBIM1  | 2 | 218855126 | 7 | 0.770182 |
| rs2292555  | TMBIM1  | 2 | 218855126 | 8 | 0.27969  |
| rs2292555  | TMBIM1  | 2 | 218855126 | 4 | 1.182204 |
| rs2292555  | TMBIM1  | 2 | 218855126 | 1 | 6.099457 |
| rs4324314  | C2orf62 | 2 | 218930090 | 1 | 1.003525 |
| rs2276631  | SLC11A1 | 2 | 218957257 | 6 | 0.304014 |
| rs1059823  | SLC11A1 | 2 | 218968088 | 3 | 0.428384 |
| rs1059823  | SLC11A1 | 2 | 218968088 | 5 | 0.476428 |
| rs500317   | USP37   | 2 | 219141197 | 1 | 4.207187 |
| rs500317   | USP37   | 2 | 219141197 | 6 | 3.595553 |
| rs500422   | USP37   | 2 | 219141239 | 1 | 6.68189  |
| rs500422   | USP37   | 2 | 219141239 | 8 | 2.585044 |
| rs500422   | USP37   | 2 | 219141239 | 5 | 3.664233 |
| rs500422   | USP37   | 2 | 219141239 | 6 | 3.649732 |
| rs3731867  | PLCD4   | 2 | 219180978 | 1 | 2.183977 |
| rs3731867  | PLCD4   | 2 | 219180978 | 8 | 1.377104 |
| rs3731867  | PLCD4   | 2 | 219180978 | 3 | 0.53222  |
| rs3731867  | PLCD4   | 2 | 219180978 | 2 | 0.67968  |
| rs612874   | PLCD4   | 2 | 219201168 | 6 | 0.969564 |
| rs612874   | PLCD4   | 2 | 219201168 | 5 | 1.793904 |
| rs612874   | PLCD4   | 2 | 219201168 | 3 | 1.092121 |
| rs612874   | PLCD4   | 2 | 219201168 | 8 | 4.023422 |
| rs612874   | PLCD4   | 2 | 219201168 | 1 | 2.688453 |
| rs3770212  | ZNF142  | 2 | 219216507 | 5 | 0.420027 |
| rs3770212  | ZNF142  | 2 | 219216507 | 2 | 4.340278 |
| rs3770213  | ZNF142  | 2 | 219216616 | 2 | 4.514354 |
| rs3770213  | ZNF142  | 2 | 219216616 | 3 | 0.02898  |
| rs3770213  | ZNF142  | 2 | 219216616 | 1 | 0.369646 |
| rs3770213  | ZNF142  | 2 | 219216616 | 8 | 0.069849 |
| rs3770214  | ZNF142  | 2 | 219217232 | 1 | 0.364497 |
| rs3770214  | ZNF142  | 2 | 219217232 | 3 | 1.012963 |
| rs3770214  | ZNF142  | 2 | 219217232 | 2 | 0.788599 |
| rs4674324  | ZNF142  | 2 | 219231677 | 5 | 0.501195 |
| rs4674324  | ZNF142  | 2 | 219231677 | 1 | 3.1767   |
| rs4674324  | ZNF142  | 2 | 219231677 | 6 | 0.693297 |
| rs4674324  | ZNF142  | 2 | 219231677 | 3 | 0.675576 |
| rs2303562  | RNF25   | 2 | 219237491 | 6 | 2.491787 |
| rs2303562  | RNF25   | 2 | 219237491 | 5 | 0.845197 |
| rs2303564  | RNF25   | 2 | 219238125 | 2 | 4.700501 |
| rs2303564  | RNF25   | 2 | 219238125 | 5 | 3.360309 |
| rs16859170 | RNF25   | 2 | 219241622 | 6 | 0.499343 |
| rs16859170 | RNF25   | 2 | 219241622 | 2 | 4.668933 |
| rs16859170 | RNF25   | 2 | 219241622 | 5 | 0.300428 |



|                |         |   |           |   |          |
|----------------|---------|---|-----------|---|----------|
| rs45586733     | STK36   | 2 | 219261667 | 2 | 2.461591 |
| rs1344642      | STK36   | 2 | 219263506 | 5 | 0.280977 |
| rs1344642      | STK36   | 2 | 219263506 | 1 | 3.581332 |
| rs1344642      | STK36   | 2 | 219263506 | 3 | 0.328012 |
| rs1863704      | STK36   | 2 | 219270919 | 3 | 0.284639 |
| rs1863704      | STK36   | 2 | 219270919 | 2 | 0.629054 |
| rs1863704      | STK36   | 2 | 219270919 | 1 | 0.517697 |
| rs12993599     | STK36   | 2 | 219271846 | 2 | 5.08772  |
| rs12993599     | STK36   | 2 | 219271846 | 6 | 6.057298 |
| rs12993599     | STK36   | 2 | 219271846 | 5 | 5.154853 |
| rs3731877      | TTLL4   | 2 | 219310743 | 6 | 0.917646 |
| rs3731877      | TTLL4   | 2 | 219310743 | 3 | 0.135438 |
| rs3731877      | TTLL4   | 2 | 219310743 | 1 | 7.110281 |
| SNP2-219603792 | CCDC108 | 2 | 219603792 | 5 | 0.776854 |
| SNP2-219603792 | CCDC108 | 2 | 219603792 | 1 | 1.767383 |
| SNP2-219603792 | CCDC108 | 2 | 219603792 | 3 | 0.399813 |
| SNP2-219603792 | CCDC108 | 2 | 219603792 | 7 | 0.3076   |
| rs4674354      | CCDC108 | 2 | 219611967 | 3 | 0.195495 |
| rs3731878      | IHH     | 2 | 219628809 | 7 | 0.085099 |
| rs3731878      | IHH     | 2 | 219628809 | 5 | 0.342669 |
| rs1127101      | C2orf24 | 2 | 219748574 | 7 | 1.287364 |
| rs3210652      | FAM134A | 2 | 219755084 | 5 | 5.961014 |
| rs3210652      | FAM134A | 2 | 219755084 | 3 | 0.536791 |
| rs3210652      | FAM134A | 2 | 219755084 | 1 | 4.180231 |
| SNP2-219780675 | ZFAND2B | 2 | 219780675 | 4 | 0.2942   |
| SNP2-219780675 | ZFAND2B | 2 | 219780675 | 1 | 3.659607 |
| rs1109867      | ABCB6   | 2 | 219791697 | 6 | 0.612283 |
| rs1109867      | ABCB6   | 2 | 219791697 | 2 | 0.266871 |
| rs11552796     | GLB1L   | 2 | 219816544 | 6 | 4.320121 |
| rs11552796     | GLB1L   | 2 | 219816544 | 2 | 2.833425 |
| rs3731892      | TUBA4B  | 2 | 219844595 | 6 | 2.112186 |
| rs41272699     | DES     | 2 | 219993120 | 3 | 0.000845 |
| rs1058261      | DES     | 2 | 219993553 | 4 | 0.237658 |
| rs1058261      | DES     | 2 | 219993553 | 5 | 2.439924 |
| rs1058261      | DES     | 2 | 219993553 | 1 | 4.160549 |
| rs12920        | DES     | 2 | 219993910 | 1 | 4.517058 |
| rs12920        | DES     | 2 | 219993910 | 5 | 0.458363 |
| rs12920        | DES     | 2 | 219993910 | 4 | 0.09862  |
| rs1058284      | DES     | 2 | 219994386 | 1 | 4.203141 |
| rs1058284      | DES     | 2 | 219994386 | 5 | 0.049428 |
| rs1058284      | DES     | 2 | 219994386 | 4 | 0.71559  |
| rs45519033     | SPEG    | 2 | 220050248 | 8 | 2.711883 |
| SNP2-220056995 | SPEG    | 2 | 220056995 | 5 | 1.116028 |
| SNP2-220056995 | SPEG    | 2 | 220056995 | 6 | 4.654736 |
| SNP2-220056995 | SPEG    | 2 | 220056995 | 4 | 0.962199 |
| GA002821       | SPEG    | 2 | 220062352 | 8 | 5.948638 |
| GA002821       | SPEG    | 2 | 220062352 | 4 | 1.259574 |

|                |           |   |           |   |          |
|----------------|-----------|---|-----------|---|----------|
| GA002821       | SPEG      | 2 | 220062352 | 1 | 3.427411 |
| rs12473286     | NULL      | 2 | 220064764 | 6 | 4.818395 |
| rs12473286     | NULL      | 2 | 220064764 | 1 | 5.994639 |
| rs12473286     | NULL      | 2 | 220064764 | 4 | 2.694985 |
| rs12473286     | NULL      | 2 | 220064764 | 5 | 0.463116 |
| rs11689281     | ACCN4     | 2 | 220110915 | 1 | 1.709253 |
| rs11689281     | ACCN4     | 2 | 220110915 | 5 | 2.35211  |
| SNP2-220129029 | OBSL1     | 2 | 220129029 | 7 | 0.446188 |
| SNP2-220129029 | OBSL1     | 2 | 220129029 | 5 | 0.401568 |
| SNP2-220129029 | OBSL1     | 2 | 220129029 | 2 | 8.520723 |
| SNP2-220129029 | OBSL1     | 2 | 220129029 | 6 | 6.041673 |
| SNP2-220129029 | OBSL1     | 2 | 220129029 | 1 | 0.283983 |
| rs1983210      | OBSL1     | 2 | 220129661 | 5 | 5.195677 |
| rs1983210      | OBSL1     | 2 | 220129661 | 7 | 0.034578 |
| rs1983210      | OBSL1     | 2 | 220129661 | 2 | 0.761666 |
| rs1983210      | OBSL1     | 2 | 220129661 | 1 | 0.568587 |
| rs1983210      | OBSL1     | 2 | 220129661 | 6 | 1.855637 |
| SNP2-220141201 | OBSL1     | 2 | 220141201 | 5 | 0.95068  |
| rs673951       | STK11IP   | 2 | 220181599 | 3 | 0.9366   |
| rs673951       | STK11IP   | 2 | 220181599 | 7 | 5.205506 |
| rs673951       | STK11IP   | 2 | 220181599 | 5 | 0.030558 |
| rs635311       | SLC4A3    | 2 | 220210611 | 7 | 0.940603 |
| rs635311       | SLC4A3    | 2 | 220210611 | 1 | 4.468671 |
| rs635311       | SLC4A3    | 2 | 220210611 | 4 | 0.947747 |
| rs684428       | SLC4A3    | 2 | 220213509 | 4 | 0.483101 |
| rs684428       | SLC4A3    | 2 | 220213509 | 1 | 4.913536 |
| rs9758         | EPHA4     | 2 | 221991244 | 5 | 0.154414 |
| rs9758         | EPHA4     | 2 | 221991244 | 4 | 0.654115 |
| rs4674664      | SGPP2     | 2 | 223131606 | 4 | 5.546846 |
| rs12467164     | FARSB     | 2 | 223229041 | 1 | 3.03983  |
| rs12720447     | KCNE4     | 2 | 223625861 | 6 | 0.990454 |
| rs12621643     | KCNE4     | 2 | 223626227 | 5 | 0.060237 |
| rs3795884      | KCNE4     | 2 | 223626607 | 2 | 1.413926 |
| rs3795884      | KCNE4     | 2 | 223626607 | 3 | 0.414184 |
| rs721233       | SCG2      | 2 | 224170958 | 7 | 9.690332 |
| rs16864975     | SCG2      | 2 | 224171408 | 8 | 0.65136  |
| rs11678024     | LOC646696 | 2 | 224277912 | 6 | 0.650225 |
| rs3738961      | AP1S3     | 2 | 224410549 | 3 | 0.27172  |
| rs3738961      | AP1S3     | 2 | 224410549 | 6 | 5.671864 |
| rs3738961      | AP1S3     | 2 | 224410549 | 1 | 4.18429  |
| rs13022532     | WDFY1     | 2 | 224449454 | 2 | 7.689741 |
| rs3738954      | FAM124B   | 2 | 224953132 | 3 | 0.524581 |
| rs3738953      | FAM124B   | 2 | 224953167 | 2 | 5.181521 |
| rs3845837      | FAM124B   | 2 | 224974911 | 1 | 3.962411 |
| rs2396092      | CUL3      | 2 | 225043534 | 5 | 3.39996  |
| rs2396092      | CUL3      | 2 | 225043534 | 6 | 0.687521 |
| rs4674908      | CUL3      | 2 | 225043839 | 7 | 0.218117 |

|                |          |   |           |   |          |
|----------------|----------|---|-----------|---|----------|
| rs4674908      | CUL3     | 2 | 225043839 | 1 | 4.709115 |
| rs4674908      | CUL3     | 2 | 225043839 | 3 | 0.006626 |
| rs4674908      | CUL3     | 2 | 225043839 | 5 | 0.518619 |
| rs3768899      | CUL3     | 2 | 225044553 | 6 | 4.811381 |
| rs3768899      | CUL3     | 2 | 225044553 | 5 | 4.766037 |
| rs10498160     | CUL3     | 2 | 225044775 | 6 | 0.259931 |
| rs10498160     | CUL3     | 2 | 225044775 | 5 | 0.884166 |
| rs3768898      | CUL3     | 2 | 225045014 | 6 | 1.169855 |
| rs3768898      | CUL3     | 2 | 225045014 | 5 | 0.145299 |
| rs10498161     | CUL3     | 2 | 225045133 | 6 | 0.980283 |
| rs10498161     | CUL3     | 2 | 225045133 | 5 | 0.293066 |
| rs1045654      | DOCK10   | 2 | 225338477 | 5 | 0.132985 |
| rs1045654      | DOCK10   | 2 | 225338477 | 4 | 0.287743 |
| rs1045654      | DOCK10   | 2 | 225338477 | 1 | 1.863673 |
| rs4674941      | DOCK10   | 2 | 225379145 | 7 | 1.436921 |
| rs4674941      | DOCK10   | 2 | 225379145 | 1 | 0.407561 |
| rs7572725      | DOCK10   | 2 | 225392410 | 7 | 1.085627 |
| rs7572725      | DOCK10   | 2 | 225392410 | 1 | 2.199672 |
| rs11884382     | KIAA1486 | 2 | 226224590 | 3 | 4.356984 |
| rs3791734      | KIAA1486 | 2 | 226224673 | 3 | 0.025058 |
| rs10180401     | KIAA1486 | 2 | 226225157 | 4 | 0.94482  |
| rs4627553      | KIAA1486 | 2 | 226225426 | 4 | 0.255091 |
| rs1801278      | IRS1     | 2 | 227368788 | 2 | 5.717844 |
| rs2228557      | COL4A4   | 2 | 227580426 | 1 | 5.722314 |
| rs2228557      | COL4A4   | 2 | 227580426 | 4 | 2.153384 |
| rs2228557      | COL4A4   | 2 | 227580426 | 7 | 1.57643  |
| rs2228557      | COL4A4   | 2 | 227580426 | 5 | 1.403282 |
| rs2228557      | COL4A4   | 2 | 227580426 | 8 | 0.477027 |
| rs2228557      | COL4A4   | 2 | 227580426 | 3 | 1.38734  |
| rs10187726     | COL4A4   | 2 | 227581239 | 4 | 1.100165 |
| rs10187726     | COL4A4   | 2 | 227581239 | 5 | 3.745289 |
| rs10187726     | COL4A4   | 2 | 227581239 | 8 | 2.137426 |
| rs10187726     | COL4A4   | 2 | 227581239 | 1 | 3.884465 |
| rs10187726     | COL4A4   | 2 | 227581239 | 3 | 1.453336 |
| rs10187726     | COL4A4   | 2 | 227581239 | 7 | 1.319754 |
| rs3817490      | COL4A4   | 2 | 227600863 | 1 | 1.546439 |
| rs2272199      | COL4A4   | 2 | 227600964 | 1 | 0.985851 |
| rs4675141      | COL4A4   | 2 | 227624076 | 1 | 3.207131 |
| rs13027659     | COL4A4   | 2 | 227624091 | 1 | 1.553223 |
| rs13424243     | COL4A3   | 2 | 227810967 | 7 | 3.937037 |
| rs13424243     | COL4A3   | 2 | 227810967 | 8 | 4.761685 |
| rs10178458     | COL4A3   | 2 | 227819679 | 5 | 0.356737 |
| SNP2-227829345 | COL4A3   | 2 | 227829345 | 3 | 1.938557 |
| SNP2-227829345 | COL4A3   | 2 | 227829345 | 7 | 2.149958 |
| SNP2-227829345 | COL4A3   | 2 | 227829345 | 2 | 1.256699 |
| rs11677877     | COL4A3   | 2 | 227839413 | 1 | 4.143719 |
| rs2070735      | COL4A3   | 2 | 227885145 | 1 | 4.390887 |

|                |              |   |           |   |          |
|----------------|--------------|---|-----------|---|----------|
| rs7587228      | COL4A3       | 2 | 227885723 | 1 | 3.152517 |
| rs4470338      | COL4A3       | 2 | 227887282 | 4 | 0.541956 |
| rs4470338      | COL4A3       | 2 | 227887282 | 7 | 1.132015 |
| rs4428010      | TM4SF20      | 2 | 227935338 | 4 | 0.72916  |
| rs4428010      | TM4SF20      | 2 | 227935338 | 7 | 1.088867 |
| rs13426457     | HRB          | 2 | 228124956 | 3 | 0.816805 |
| rs2138405      | DKFZp547H025 | 2 | 228183371 | 6 | 0.531047 |
| rs2138405      | DKFZp547H025 | 2 | 228183371 | 1 | 0.079698 |
| rs2138404      | DKFZp547H025 | 2 | 228183411 | 5 | 1.379974 |
| rs2138402      | DKFZp547H025 | 2 | 228184497 | 6 | 0.323399 |
| rs2138402      | DKFZp547H025 | 2 | 228184497 | 2 | 0.941046 |
| rs7557339      | LOC729968    | 2 | 228303801 | 8 | 4.575752 |
| rs1715828      | WDR69        | 2 | 228466798 | 7 | 0.079525 |
| rs1715828      | WDR69        | 2 | 228466798 | 8 | 6.128235 |
| rs1715828      | WDR69        | 2 | 228466798 | 1 | 5.937899 |
| rs1715828      | WDR69        | 2 | 228466798 | 3 | 1.243332 |
| rs3811515      | SPHKAP       | 2 | 228591273 | 7 | 2.890443 |
| rs7355333      | SLC16A14     | 2 | 230608009 | 4 | 0.578296 |
| SNP2-230619209 | SLC16A14     | 2 | 230619209 | 5 | 0.036197 |
| SNP2-230619209 | SLC16A14     | 2 | 230619209 | 8 | 3.599993 |
| rs3948463      | SP110        | 2 | 230745104 | 2 | 5.159629 |
| rs3948463      | SP110        | 2 | 230745104 | 6 | 6.173878 |
| SNP2-230785356 | SP110        | 2 | 230785356 | 4 | 6.819038 |
| SNP2-230785356 | SP110        | 2 | 230785356 | 5 | 0.569183 |
| SNP2-230785356 | SP110        | 2 | 230785356 | 6 | 0.323158 |
| SNP2-230785356 | SP110        | 2 | 230785356 | 1 | 5.288487 |
| SNP2-230785920 | SP110        | 2 | 230785920 | 5 | 9.472663 |
| SNP2-230785920 | SP110        | 2 | 230785920 | 6 | 5.753552 |
| SNP2-230785920 | SP110        | 2 | 230785920 | 8 | 8.167863 |
| SNP2-230785920 | SP110        | 2 | 230785920 | 1 | 0.281964 |
| rs10498247     | SP140        | 2 | 230886066 | 1 | 4.48059  |
| rs10498247     | SP140        | 2 | 230886066 | 4 | 2.302024 |
| rs7559665      | LOC93349     | 2 | 230965056 | 8 | 1.119831 |
| rs7590429      | LOC93349     | 2 | 230966394 | 5 | 2.962907 |
| rs7590429      | LOC93349     | 2 | 230966394 | 4 | 0.78664  |
| rs7590429      | LOC93349     | 2 | 230966394 | 1 | 4.153109 |
| rs11692506     | LOC93349     | 2 | 230976169 | 5 | 0.735791 |
| rs11692506     | LOC93349     | 2 | 230976169 | 1 | 1.144303 |
| rs11692506     | LOC93349     | 2 | 230976169 | 8 | 1.04284  |
| rs11692506     | LOC93349     | 2 | 230976169 | 2 | 2.057797 |
| rs17273079     | LOC93349     | 2 | 230976568 | 2 | 2.837305 |
| rs17273079     | LOC93349     | 2 | 230976568 | 1 | 0.004495 |
| rs17273079     | LOC93349     | 2 | 230976568 | 8 | 3.590678 |
| rs17273079     | LOC93349     | 2 | 230976568 | 5 | 0.09983  |
| rs2396763      | LOC646839    | 2 | 231145323 | 2 | 0.687611 |
| rs2396763      | LOC646839    | 2 | 231145323 | 3 | 0.658031 |
| rs2396763      | LOC646839    | 2 | 231145323 | 7 | 0.522833 |

|                |           |   |           |   |          |
|----------------|-----------|---|-----------|---|----------|
| rs6716468      | CAB39     | 2 | 231391865 | 4 | 0.195036 |
| rs1992188      | GPR55     | 2 | 231480680 | 5 | 1.241667 |
| rs1992188      | GPR55     | 2 | 231480680 | 4 | 0.346744 |
| rs1992188      | GPR55     | 2 | 231480680 | 3 | 3.781672 |
| rs1992186      | GPR55     | 2 | 231483541 | 3 | 4.03503  |
| rs4972979      | SPATA3    | 2 | 231587078 | 5 | 1.33812  |
| rs3731783      | LOC257407 | 2 | 231621300 | 5 | 0.579715 |
| rs13430407     | PSMD1     | 2 | 231743673 | 3 | 0.479182 |
| rs13430407     | PSMD1     | 2 | 231743673 | 5 | 0.586648 |
| rs13430407     | PSMD1     | 2 | 231743673 | 2 | 2.345251 |
| rs2290130      | B3GNT7    | 2 | 231971371 | 3 | 0.184731 |
| rs2290130      | B3GNT7    | 2 | 231971371 | 1 | 4.860533 |
| rs7580705      | C2orf52   | 2 | 232081540 | 1 | 3.36999  |
| rs2245601      | CHRND     | 2 | 233099181 | 1 | 2.099741 |
| rs2245601      | CHRND     | 2 | 233099181 | 7 | 1.017538 |
| rs2767         | CHRND     | 2 | 233108318 | 5 | 0.615397 |
| rs2099489      | CHRNA     | 2 | 233118538 | 3 | 0.482216 |
| rs2276557      | EFHD1     | 2 | 233206913 | 6 | 2.367056 |
| rs1801251      | KCNJ13    | 2 | 233341704 | 8 | 0.95896  |
| rs1801251      | KCNJ13    | 2 | 233341704 | 5 | 3.99636  |
| rs1801251      | KCNJ13    | 2 | 233341704 | 4 | 4.583632 |
| rs1801251      | KCNJ13    | 2 | 233341704 | 6 | 0.363061 |
| rs3738904      | TNRC15    | 2 | 233430337 | 7 | 1.722729 |
| rs1141328      | NULL      | 2 | 233633410 | 8 | 0.38496  |
| rs1141328      | NULL      | 2 | 233633410 | 2 | 1.926956 |
| rs1141328      | NULL      | 2 | 233633410 | 3 | 0.263618 |
| rs6861         | ATG16L1   | 2 | 233868852 | 6 | 0.262747 |
| rs6861         | ATG16L1   | 2 | 233868852 | 8 | 1.735645 |
| SNP2-233889477 | SAG       | 2 | 233889477 | 4 | 2.499386 |
| rs9752946      | DGKD      | 2 | 234036090 | 8 | 4.224836 |
| rs1053895      | DGKD      | 2 | 234043641 | 8 | 0.149217 |
| rs1053895      | DGKD      | 2 | 234043641 | 6 | 0.927662 |
| rs882428       | DGKD      | 2 | 234044862 | 4 | 0.641263 |
| rs2971863      | USP40     | 2 | 234050873 | 2 | 0.72331  |
| rs2971863      | USP40     | 2 | 234050873 | 1 | 1.126614 |
| rs2971863      | USP40     | 2 | 234050873 | 4 | 0.582798 |
| rs2167884      | USP40     | 2 | 234114055 | 4 | 0.135788 |
| rs2167884      | USP40     | 2 | 234114055 | 1 | 0.273886 |
| rs10929303     | UGT1A8    | 2 | 234346155 | 7 | 1.611008 |
| rs10929303     | UGT1A8    | 2 | 234346155 | 6 | 1.654846 |
| rs10929303     | UGT1A8    | 2 | 234346155 | 8 | 0.085356 |
| rs10929303     | UGT1A8    | 2 | 234346155 | 1 | 4.566771 |
| rs10929303     | UGT1A8    | 2 | 234346155 | 4 | 0.00812  |
| rs8330         | UGT1A8    | 2 | 234346384 | 6 | 4.031815 |
| rs8330         | UGT1A8    | 2 | 234346384 | 1 | 5.356571 |
| rs8330         | UGT1A8    | 2 | 234346384 | 4 | 4.293075 |
| rs2361503      | LOC339766 | 2 | 234369057 | 4 | 2.830494 |

|            |           |   |           |   |          |
|------------|-----------|---|-----------|---|----------|
| rs2361503  | LOC339766 | 2 | 234369057 | 7 | 2.380388 |
| rs2361503  | LOC339766 | 2 | 234369057 | 6 | 2.406582 |
| rs759173   | LOC339766 | 2 | 234369429 | 5 | 2.179295 |
| rs759173   | LOC339766 | 2 | 234369429 | 6 | 1.440954 |
| rs759173   | LOC339766 | 2 | 234369429 | 1 | 1.900404 |
| rs6754859  | LOC339766 | 2 | 234392725 | 1 | 1.639906 |
| rs6754859  | LOC339766 | 2 | 234392725 | 5 | 0.550747 |
| rs1500480  | LOC339766 | 2 | 234392817 | 7 | 4.63208  |
| rs2270856  | LOC339766 | 2 | 234406547 | 3 | 0.057483 |
| rs3732215  | HJURP     | 2 | 234415281 | 4 | 7.12346  |
| rs3732215  | HJURP     | 2 | 234415281 | 7 | 0.336123 |
| rs3732215  | HJURP     | 2 | 234415281 | 1 | 0.855925 |
| rs529963   | HJURP     | 2 | 234423239 | 7 | 4.812641 |
| rs529963   | HJURP     | 2 | 234423239 | 1 | 5.90475  |
| rs188492   | MSL3L2    | 2 | 234438815 | 1 | 4.431994 |
| rs188492   | MSL3L2    | 2 | 234438815 | 7 | 0.182817 |
| rs188492   | MSL3L2    | 2 | 234438815 | 6 | 1.362533 |
| rs188492   | MSL3L2    | 2 | 234438815 | 3 | 0.119061 |
| rs13384181 | MSL3L2    | 2 | 234440085 | 3 | 0.430502 |
| rs13384181 | MSL3L2    | 2 | 234440085 | 6 | 0.818732 |
| rs213545   | MSL3L2    | 2 | 234440680 | 4 | 0.904252 |
| rs213545   | MSL3L2    | 2 | 234440680 | 8 | 3.947305 |
| rs213545   | MSL3L2    | 2 | 234440680 | 2 | 5.724394 |
| rs213545   | MSL3L2    | 2 | 234440680 | 3 | 1.067545 |
| rs213545   | MSL3L2    | 2 | 234440680 | 6 | 0.955007 |
| rs11563208 | TRPM8     | 2 | 234569817 | 6 | 2.398061 |
| rs11563208 | TRPM8     | 2 | 234569817 | 8 | 5.979804 |
| rs11563208 | TRPM8     | 2 | 234569817 | 5 | 0.219722 |
| rs11901004 | TRPM8     | 2 | 234591999 | 8 | 0.31668  |
| rs2052029  | TRPM8     | 2 | 234592427 | 3 | 0.36809  |
| rs28902238 | TRPM8     | 2 | 234592432 | 1 | 4.668421 |
| rs28902238 | TRPM8     | 2 | 234592432 | 5 | 6.945603 |
| rs763379   | TRPM8     | 2 | 234592520 | 1 | 5.358725 |
| rs763379   | TRPM8     | 2 | 234592520 | 5 | 2.237734 |
| rs763380   | TRPM8     | 2 | 234592529 | 1 | 4.369557 |
| rs763380   | TRPM8     | 2 | 234592529 | 5 | 0.130478 |
| rs8245     | ARL4C     | 2 | 235068726 | 7 | 0.341147 |
| rs8245     | ARL4C     | 2 | 235068726 | 1 | 2.429809 |
| rs3795962  | SH3BP4    | 2 | 235616558 | 6 | 5.063579 |
| rs3795962  | SH3BP4    | 2 | 235616558 | 7 | 7.108419 |
| rs3795962  | SH3BP4    | 2 | 235616558 | 3 | 0.122318 |
| rs3795962  | SH3BP4    | 2 | 235616558 | 4 | 7.722373 |
| rs4589703  | SH3BP4    | 2 | 235627545 | 1 | 3.611596 |
| rs2292708  | CENTG2    | 2 | 236372905 | 4 | 0.546613 |
| rs2292708  | CENTG2    | 2 | 236372905 | 3 | 1.523602 |
| rs2292708  | CENTG2    | 2 | 236372905 | 2 | 2.048618 |
| rs2292708  | CENTG2    | 2 | 236372905 | 6 | 1.777359 |

|                |         |   |           |   |          |
|----------------|---------|---|-----------|---|----------|
| rs2292708      | CENTG2  | 2 | 236372905 | 5 | 1.737416 |
| rs1050785      | COL6A3  | 2 | 237897491 | 8 | 1.167882 |
| rs1050785      | COL6A3  | 2 | 237897491 | 5 | 0.128058 |
| rs1050785      | COL6A3  | 2 | 237897491 | 1 | 2.352227 |
| rs7436         | COL6A3  | 2 | 237897550 | 7 | 0.88118  |
| rs7436         | COL6A3  | 2 | 237897550 | 1 | 5.45039  |
| rs4663722      | COL6A3  | 2 | 237898149 | 7 | 1.615137 |
| rs4663722      | COL6A3  | 2 | 237898149 | 1 | 2.725172 |
| rs6728818      | COL6A3  | 2 | 237909702 | 8 | 0.691275 |
| rs6728818      | COL6A3  | 2 | 237909702 | 6 | 0.002762 |
| rs6728818      | COL6A3  | 2 | 237909702 | 4 | 1.474488 |
| rs36104025     | COL6A3  | 2 | 237912473 | 4 | 0.240542 |
| rs4433949      | COL6A3  | 2 | 237914369 | 3 | 0.583799 |
| rs4433949      | COL6A3  | 2 | 237914369 | 8 | 3.010073 |
| rs4433949      | COL6A3  | 2 | 237914369 | 1 | 1.989723 |
| rs2291795      | COL6A3  | 2 | 237917804 | 4 | 2.146498 |
| rs3790993      | COL6A3  | 2 | 237923553 | 1 | 0.926351 |
| rs3790993      | COL6A3  | 2 | 237923553 | 3 | 0.710665 |
| rs3790993      | COL6A3  | 2 | 237923553 | 8 | 1.389845 |
| rs12622093     | COL6A3  | 2 | 237948344 | 3 | 0.874956 |
| rs3751109      | MLPH    | 2 | 238091933 | 3 | 2.235406 |
| rs3751109      | MLPH    | 2 | 238091933 | 8 | 0.206074 |
| rs3751109      | MLPH    | 2 | 238091933 | 4 | 0.39545  |
| rs2292881      | MLPH    | 2 | 238098988 | 3 | 0.276147 |
| rs11883500     | MLPH    | 2 | 238099173 | 3 | 1.342527 |
| rs2292884      | MLPH    | 2 | 238107965 | 8 | 0.50608  |
| rs2292884      | MLPH    | 2 | 238107965 | 4 | 0.846126 |
| rs3817362      | MLPH    | 2 | 238113746 | 6 | 0.127121 |
| SNP2-238159481 | RAB17   | 2 | 238159481 | 6 | 0.208726 |
| SNP2-238159481 | RAB17   | 2 | 238159481 | 3 | 0.06666  |
| SNP2-238159481 | RAB17   | 2 | 238159481 | 1 | 3.631841 |
| rs2292873      | RAB17   | 2 | 238164183 | 1 | 5.899542 |
| rs2292872      | RAB17   | 2 | 238164273 | 3 | 1.151602 |
| rs7609062      | LRRFIP1 | 2 | 238336628 | 2 | 3.039537 |
| rs3739038      | LRRFIP1 | 2 | 238337442 | 4 | 4.926684 |
| rs3739038      | LRRFIP1 | 2 | 238337442 | 6 | 6.658996 |
| rs3739038      | LRRFIP1 | 2 | 238337442 | 1 | 0.822428 |
| rs3739038      | LRRFIP1 | 2 | 238337442 | 2 | 5.77447  |
| rs4663795      | RBM44   | 2 | 238397755 | 1 | 5.073593 |
| rs4663795      | RBM44   | 2 | 238397755 | 4 | 0.022893 |
| rs1128552      | SCLY    | 2 | 238664622 | 5 | 0.688927 |
| rs1128552      | SCLY    | 2 | 238664622 | 3 | 0.837566 |
| rs12993309     | SCLY    | 2 | 238671618 | 6 | 0.9786   |
| rs12993309     | SCLY    | 2 | 238671618 | 8 | 6.680352 |
| rs12993309     | SCLY    | 2 | 238671618 | 3 | 0.136522 |
| rs12993309     | SCLY    | 2 | 238671618 | 4 | 4.603719 |
| rs12993309     | SCLY    | 2 | 238671618 | 5 | 0.778162 |

|                |           |   |           |   |          |
|----------------|-----------|---|-----------|---|----------|
| rs1054641      | SCLY      | 2 | 238672589 | 3 | 0.0551   |
| rs935415       | ESPNL     | 2 | 238681278 | 3 | 1.003066 |
| SNP2-238703814 | ESPNL     | 2 | 238703814 | 5 | 1.86481  |
| SNP2-238703814 | ESPNL     | 2 | 238703814 | 3 | 3.061144 |
| SNP2-238703814 | ESPNL     | 2 | 238703814 | 6 | 1.892627 |
| SNP2-238703814 | ESPNL     | 2 | 238703814 | 4 | 2.422656 |
| rs935412       | ESPNL     | 2 | 238706565 | 1 | 1.608226 |
| rs935412       | ESPNL     | 2 | 238706565 | 3 | 0.698106 |
| rs935411       | KLHL30    | 2 | 238716289 | 7 | 0.53879  |
| rs3795905      | FAM132B   | 2 | 238740551 | 5 | 0.894137 |
| rs3820817      | FAM132B   | 2 | 238740674 | 6 | 1.400593 |
| rs3820817      | FAM132B   | 2 | 238740674 | 1 | 1.076904 |
| rs7572285      | LOC151174 | 2 | 238798795 | 8 | 0.222861 |
| rs7572285      | LOC151174 | 2 | 238798795 | 4 | 0.337528 |
| rs7572285      | LOC151174 | 2 | 238798795 | 1 | 1.774727 |
| rs7572285      | LOC151174 | 2 | 238798795 | 2 | 2.236959 |
| SNP2-238826696 | PER2      | 2 | 238826696 | 2 | 4.928748 |
| rs2304670      | PER2      | 2 | 238830375 | 5 | 0.039221 |
| rs477041       | ASB1      | 2 | 239020734 | 5 | 5.489948 |
| rs477041       | ASB1      | 2 | 239020734 | 4 | 0.029565 |
| rs514795       | ASB1      | 2 | 239023591 | 3 | 0.05204  |
| rs514795       | ASB1      | 2 | 239023591 | 1 | 6.316457 |
| rs514795       | ASB1      | 2 | 239023591 | 5 | 0.181965 |
| rs514795       | ASB1      | 2 | 239023591 | 4 | 4.281373 |
| rs514795       | ASB1      | 2 | 239023591 | 6 | 0.270879 |
| rs13383477     | FLJ43879  | 2 | 239512115 | 8 | 3.072124 |
| rs13383477     | FLJ43879  | 2 | 239512115 | 6 | 3.882996 |
| rs13393217     | HDAC4     | 2 | 239637498 | 3 | 0.634982 |
| rs13393217     | HDAC4     | 2 | 239637498 | 1 | 3.255154 |
| rs11683242     | FLJ45964  | 2 | 240165231 | 5 | 0.794642 |
| rs11683242     | FLJ45964  | 2 | 240165231 | 8 | 2.536574 |
| rs11683242     | FLJ45964  | 2 | 240165231 | 1 | 2.421278 |
| rs2008714      | FLJ45964  | 2 | 240172268 | 7 | 0.909372 |
| rs2008714      | FLJ45964  | 2 | 240172268 | 4 | 0.720173 |
| rs1574030      | LOC150935 | 2 | 240386665 | 3 | 1.077158 |
| rs6728493      | LOC643905 | 2 | 240629935 | 3 | 1.254269 |
| rs6732185      | LOC643905 | 2 | 240630048 | 1 | 0.940926 |
| rs6732185      | LOC643905 | 2 | 240630048 | 3 | 0.181733 |
| rs6732185      | LOC643905 | 2 | 240630048 | 2 | 0.009383 |
| rs4292120      | MYEOV2    | 2 | 240714953 | 6 | 0.12659  |
| rs4292120      | MYEOV2    | 2 | 240714953 | 4 | 0.708267 |
| rs4292120      | MYEOV2    | 2 | 240714953 | 1 | 0.846511 |
| rs4292120      | MYEOV2    | 2 | 240714953 | 7 | 0.938933 |
| rs1126920      | GPC1      | 2 | 241054152 | 1 | 4.3634   |
| SNP2-241054156 | GPC1      | 2 | 241054156 | 7 | 0.723945 |
| rs2228331      | GPC1      | 2 | 241054201 | 5 | 0.437016 |
| rs2228331      | GPC1      | 2 | 241054201 | 4 | 0.159958 |



|                |           |   |           |   |          |
|----------------|-----------|---|-----------|---|----------|
| rs2228331      | GPC1      | 2 | 241054201 | 2 | 12.32275 |
| rs13013933     | GPC1      | 2 | 241055203 | 2 | 3.743162 |
| rs3792215      | GPC1      | 2 | 241055322 | 2 | 2.07678  |
| rs3792215      | GPC1      | 2 | 241055322 | 5 | 0.143618 |
| rs3792215      | GPC1      | 2 | 241055322 | 4 | 3.503866 |
| rs3792215      | GPC1      | 2 | 241055322 | 8 | 0.030521 |
| rs3792214      | GPC1      | 2 | 241055374 | 4 | 0.604363 |
| rs3792214      | GPC1      | 2 | 241055374 | 5 | 0.274041 |
| rs3792214      | GPC1      | 2 | 241055374 | 8 | 0.357875 |
| SNP2-241112268 | ANKMY1    | 2 | 241112268 | 3 | 0.41096  |
| rs3792269      | CAPN10    | 2 | 241180152 | 7 | 0.421917 |
| rs3792269      | CAPN10    | 2 | 241180152 | 6 | 0.371261 |
| rs3792269      | CAPN10    | 2 | 241180152 | 1 | 4.096824 |
| rs3749166      | CAPN10    | 2 | 241186094 | 6 | 7.126569 |
| rs3749172      | GPR35     | 2 | 241218922 | 6 | 1.674213 |
| rs3749172      | GPR35     | 2 | 241218922 | 1 | 0.779892 |
| rs3749172      | GPR35     | 2 | 241218922 | 3 | 1.444349 |
| rs4613         | KIF1A     | 2 | 241301960 | 3 | 0.354812 |
| rs4613         | KIF1A     | 2 | 241301960 | 1 | 0.417828 |
| rs34116584     | AGXT      | 2 | 241456987 | 7 | 0.094032 |
| rs4426527      | AGXT      | 2 | 241466189 | 7 | 1.118155 |
| rs13397515     | C2orf54   | 2 | 241474723 | 6 | 5.729426 |
| rs13397515     | C2orf54   | 2 | 241474723 | 5 | 0.333815 |
| rs13397515     | C2orf54   | 2 | 241474723 | 3 | 0.744161 |
| rs13397515     | C2orf54   | 2 | 241474723 | 8 | 1.277213 |
| rs13397515     | C2orf54   | 2 | 241474723 | 1 | 4.180277 |
| rs13422330     | C2orf54   | 2 | 241474812 | 6 | 0.461016 |
| rs13422330     | C2orf54   | 2 | 241474812 | 8 | 3.666677 |
| rs13422330     | C2orf54   | 2 | 241474812 | 3 | 0.00917  |
| rs13422330     | C2orf54   | 2 | 241474812 | 4 | 1.319148 |
| rs13422330     | C2orf54   | 2 | 241474812 | 1 | 2.522851 |
| rs13422330     | C2orf54   | 2 | 241474812 | 5 | 0.235829 |
| SNP2-241476471 | C2orf54   | 2 | 241476471 | 8 | 0.586168 |
| SNP2-241476471 | C2orf54   | 2 | 241476471 | 4 | 2.319548 |
| rs10193144     | LOC728763 | 2 | 241521395 | 7 | 1.120574 |
| rs17440466     | SNED1     | 2 | 241659757 | 1 | 1.687383 |
| rs17440466     | SNED1     | 2 | 241659757 | 3 | 0.41513  |
| rs2108485      | SNED1     | 2 | 241670415 | 1 | 6.406624 |
| rs4035         | MTERFD2   | 2 | 241675281 | 1 | 3.622922 |
| rs2067987      | MTERFD2   | 2 | 241676599 | 3 | 0.281533 |
| rs10933529     | MTERFD2   | 2 | 241676955 | 1 | 5.140904 |
| SNP2-241678099 | MTERFD2   | 2 | 241678099 | 1 | 6.920903 |
| rs16843241     | SNED1     | 2 | 241679763 | 1 | 5.212872 |
| rs16843242     | SNED1     | 2 | 241679954 | 1 | 4.605184 |
| rs16843242     | SNED1     | 2 | 241679954 | 3 | 0.457575 |
| rs3815291      | SNED1     | 2 | 241681213 | 1 | 0.53913  |
| rs3815291      | SNED1     | 2 | 241681213 | 5 | 0.295459 |

|                |           |   |           |   |          |
|----------------|-----------|---|-----------|---|----------|
| rs2302047      | MTERFD2   | 2 | 241682443 | 5 | 4.948431 |
| rs2302047      | MTERFD2   | 2 | 241682443 | 6 | 4.997862 |
| rs2074824      | PASK      | 2 | 241700450 | 1 | 3.428537 |
| rs2074824      | PASK      | 2 | 241700450 | 3 | 0.30543  |
| SNP2-241714617 | PASK      | 2 | 241714617 | 3 | 0.623607 |
| rs2240542      | PASK      | 2 | 241714987 | 5 | 0.34625  |
| rs2240542      | PASK      | 2 | 241714987 | 3 | 0.548653 |
| rs2240544      | PASK      | 2 | 241715503 | 3 | 0.301515 |
| rs1470414      | PASK      | 2 | 241726169 | 1 | 0.991883 |
| rs6709462      | PASK      | 2 | 241730935 | 8 | 1.674848 |
| rs6709462      | PASK      | 2 | 241730935 | 2 | 1.065128 |
| rs6709462      | PASK      | 2 | 241730935 | 1 | 0.382803 |
| rs6709462      | PASK      | 2 | 241730935 | 4 | 0.383887 |
| rs3806599      | LOC644302 | 2 | 241737594 | 1 | 3.314953 |
| rs7593101      | TMEM16G   | 2 | 241800258 | 5 | 1.129917 |
| rs7593101      | TMEM16G   | 2 | 241800258 | 1 | 0.066584 |
| rs7590653      | TMEM16G   | 2 | 241812032 | 5 | 0.297599 |
| rs7590653      | TMEM16G   | 2 | 241812032 | 1 | 4.260827 |
| SNP2-242056261 | FARP2     | 2 | 242056261 | 4 | 0.54682  |
| SNP2-242056261 | FARP2     | 2 | 242056261 | 7 | 0.386424 |
| SNP2-242056261 | FARP2     | 2 | 242056261 | 5 | 0.533381 |
| rs17453555     | LOC728249 | 2 | 242066481 | 2 | 0.376463 |
| rs17453555     | LOC728249 | 2 | 242066481 | 5 | 0.302571 |
| rs17453555     | LOC728249 | 2 | 242066481 | 1 | 0.523537 |
| SNP2-242261762 | ATG4B     | 2 | 242261762 | 6 | 6.761596 |
| SNP2-242261762 | ATG4B     | 2 | 242261762 | 7 | 0.33275  |
| SNP2-242261762 | ATG4B     | 2 | 242261762 | 8 | 0.57607  |
| rs7370843      | D2HGDH    | 2 | 242322777 | 3 | 1.078681 |
| rs7370843      | D2HGDH    | 2 | 242322777 | 1 | 0.204092 |
| rs7370843      | D2HGDH    | 2 | 242322777 | 8 | 0.382506 |
| SNP2-242339348 | D2HGDH    | 2 | 242339348 | 7 | 1.523749 |
| SNP2-242339348 | D2HGDH    | 2 | 242339348 | 3 | 2.050093 |
| SNP2-242406493 | NEU4      | 2 | 242406493 | 6 | 1.826193 |
| SNP2-242406493 | NEU4      | 2 | 242406493 | 2 | 1.841578 |
| SNP2-242462682 | FLJ33590  | 2 | 242462682 | 5 | 0.086118 |
| SNP2-242463033 | FLJ33590  | 2 | 242463033 | 4 | 2.570156 |
| SNP2-242463033 | FLJ33590  | 2 | 242463033 | 7 | 2.261749 |
| SNP2-242463033 | FLJ33590  | 2 | 242463033 | 6 | 0.465672 |
| rs2272522      | CHL1      | 3 | 336508    | 7 | 0.300688 |
| rs2272522      | CHL1      | 3 | 336508    | 5 | 0.231497 |
| rs7431184      | LOC727810 | 3 | 1922477   | 5 | 0.979757 |
| rs7629924      | CNTN4     | 3 | 3042850   | 1 | 1.951142 |
| rs7629924      | CNTN4     | 3 | 3042850   | 8 | 0.913452 |
| rs6790908      | CNTN4     | 3 | 3051401   | 1 | 0.497221 |
| rs6790908      | CNTN4     | 3 | 3051401   | 5 | 0.988188 |
| rs6790908      | CNTN4     | 3 | 3051401   | 8 | 0.611375 |
| rs6803232      | CNTN4     | 3 | 3051443   | 5 | 1.681005 |

|              |           |   |         |   |          |
|--------------|-----------|---|---------|---|----------|
| rs6803232    | CNTN4     | 3 | 3051443 | 8 | 1.269548 |
| rs6802588    | CNTN4     | 3 | 3056750 | 5 | 0.423725 |
| rs6802588    | CNTN4     | 3 | 3056750 | 3 | 0.512915 |
| rs340833     | IL5RA     | 3 | 3086458 | 3 | 1.219311 |
| rs14275      | SUMF1     | 3 | 4378153 | 1 | 0.194278 |
| rs14275      | SUMF1     | 3 | 4378153 | 2 | 4.662865 |
| rs14275      | SUMF1     | 3 | 4378153 | 3 | 0.072221 |
| rs14275      | SUMF1     | 3 | 4378153 | 7 | 0.028509 |
| rs901854     | ITPR1     | 3 | 4831234 | 3 | 0.350125 |
| rs901854     | ITPR1     | 3 | 4831234 | 4 | 0.939777 |
| rs3749380    | GRM7      | 3 | 6878297 | 4 | 1.40861  |
| rs3749380    | GRM7      | 3 | 6878297 | 3 | 0.724986 |
| rs7614915    | GRM7      | 3 | 7595382 | 4 | 0.488741 |
| rs7614915    | GRM7      | 3 | 7595382 | 3 | 0.654381 |
| rs7614915    | GRM7      | 3 | 7595382 | 5 | 1.056386 |
| rs1485175    | GRM7      | 3 | 7595789 | 6 | 0.541172 |
| rs1485174    | GRM7      | 3 | 7595828 | 5 | 1.678254 |
| rs1485174    | GRM7      | 3 | 7595828 | 6 | 1.718697 |
| rs1485174    | GRM7      | 3 | 7595828 | 3 | 1.666349 |
| rs2276800    | C3orf32   | 3 | 8650539 | 5 | 1.585255 |
| rs11476      | CAV3      | 3 | 8763198 | 5 | 0.62208  |
| rs2324728    | OXTR      | 3 | 8767728 | 1 | 0.329389 |
| rs2324728    | OXTR      | 3 | 8767728 | 3 | 0.587617 |
| rs2324728    | OXTR      | 3 | 8767728 | 6 | 0.419991 |
| rs9872310    | OXTR      | 3 | 8768381 | 3 | 1.09122  |
| rs9872310    | OXTR      | 3 | 8768381 | 6 | 0.001323 |
| rs6770632    | OXTR      | 3 | 8768724 | 2 | 2.02348  |
| rs6770632    | OXTR      | 3 | 8768724 | 1 | 0.906571 |
| rs6770632    | OXTR      | 3 | 8768724 | 6 | 0.741615 |
| rs6770632    | OXTR      | 3 | 8768724 | 3 | 0.122288 |
| rs1042778    | OXTR      | 3 | 8769545 | 6 | 2.439414 |
| rs1042778    | OXTR      | 3 | 8769545 | 7 | 0.250476 |
| rs1042778    | OXTR      | 3 | 8769545 | 1 | 1.182264 |
| rs1042778    | OXTR      | 3 | 8769545 | 5 | 0.350952 |
| rs237902     | OXTR      | 3 | 8784184 | 8 | 1.442956 |
| rs237902     | OXTR      | 3 | 8784184 | 3 | 1.783844 |
| rs237902     | OXTR      | 3 | 8784184 | 7 | 1.687751 |
| rs237902     | OXTR      | 3 | 8784184 | 2 | 1.107689 |
| rs237902     | OXTR      | 3 | 8784184 | 1 | 2.099548 |
| SNP3-8784222 | OXTR      | 3 | 8784222 | 4 | 2.380825 |
| SNP3-8784222 | OXTR      | 3 | 8784222 | 2 | 3.250893 |
| SNP3-8784222 | OXTR      | 3 | 8784222 | 1 | 2.909202 |
| rs2258767    | THUMPD3   | 3 | 9379887 | 8 | 6.287098 |
| rs1129174    | THUMPD3   | 3 | 9401224 | 6 | 1.303491 |
| rs1129174    | THUMPD3   | 3 | 9401224 | 5 | 0.330409 |
| rs2596912    | LOC440944 | 3 | 9413746 | 5 | 1.064739 |
| rs2596912    | LOC440944 | 3 | 9413746 | 8 | 0.022475 |

|              |           |   |          |   |          |
|--------------|-----------|---|----------|---|----------|
| rs2596912    | LOC440944 | 3 | 9413746  | 6 | 0.329577 |
| rs2596912    | LOC440944 | 3 | 9413746  | 7 | 0.130485 |
| rs2596912    | LOC440944 | 3 | 9413746  | 3 | 0.980896 |
| SNP3-9492369 | SETD5     | 3 | 9492369  | 3 | 0.158855 |
| rs2648593    | LHFPL4    | 3 | 9570374  | 5 | 3.158932 |
| rs17222536   | CIDEC     | 3 | 9883935  | 1 | 4.213477 |
| SNP3-9909753 | JAGN1     | 3 | 9909753  | 5 | 0.617578 |
| SNP3-9909753 | JAGN1     | 3 | 9909753  | 3 | 0.008997 |
| SNP3-9923059 | IL17RE    | 3 | 9923059  | 7 | 0.789706 |
| rs3774207    | CRELD1    | 3 | 9960656  | 4 | 8.610418 |
| rs3774207    | CRELD1    | 3 | 9960656  | 1 | 4.036877 |
| SNP3-9965800 | PRRT3     | 3 | 9965800  | 4 | 0.149258 |
| SNP3-9965800 | PRRT3     | 3 | 9965800  | 1 | 3.065895 |
| SNP3-9966101 | PRRT3     | 3 | 9966101  | 4 | 1.665229 |
| SNP3-9966101 | PRRT3     | 3 | 9966101  | 1 | 3.382405 |
| rs7626117    | FANCD2    | 3 | 10115671 | 1 | 5.26483  |
| rs7626117    | FANCD2    | 3 | 10115671 | 4 | 3.868279 |
| rs7647987    | FANCD2    | 3 | 10115696 | 1 | 5.73949  |
| rs7647987    | FANCD2    | 3 | 10115696 | 4 | 3.545545 |
| rs3172417    | FANCD2    | 3 | 10117949 | 8 | 3.317715 |
| rs3172417    | FANCD2    | 3 | 10117949 | 2 | 1.376735 |
| rs3172417    | FANCD2    | 3 | 10117949 | 1 | 0.756116 |
| rs7645667    | C3orf10   | 3 | 10132337 | 4 | 0.251364 |
| rs2075352    | TATDN2    | 3 | 10286939 | 4 | 8.838734 |
| rs1063429    | TATDN2    | 3 | 10295968 | 7 | 0.866666 |
| rs1063429    | TATDN2    | 3 | 10295968 | 5 | 3.784286 |
| rs514658     | TATDN2    | 3 | 10296734 | 5 | 0.212453 |
| rs41147      | ATP2B2    | 3 | 10343102 | 8 | 2.379339 |
| rs41147      | ATP2B2    | 3 | 10343102 | 4 | 0.44601  |
| rs41147      | ATP2B2    | 3 | 10343102 | 5 | 0.575361 |
| rs41147      | ATP2B2    | 3 | 10343102 | 1 | 2.96032  |
| rs14154      | ATP2B2    | 3 | 10343113 | 5 | 2.592545 |
| rs14154      | ATP2B2    | 3 | 10343113 | 8 | 1.363291 |
| rs14154      | ATP2B2    | 3 | 10343113 | 1 | 4.058523 |
| rs14154      | ATP2B2    | 3 | 10343113 | 4 | 2.094176 |
| rs35674      | ATP2B2    | 3 | 10343577 | 1 | 0.7566   |
| rs35674      | ATP2B2    | 3 | 10343577 | 4 | 0.635261 |
| rs35674      | ATP2B2    | 3 | 10343577 | 5 | 1.184632 |
| rs35674      | ATP2B2    | 3 | 10343577 | 2 | 1.104599 |
| rs1719571    | ATP2B2    | 3 | 10344180 | 8 | 1.280713 |
| rs2289274    | ATP2B2    | 3 | 10388715 | 1 | 1.955271 |
| rs2289274    | ATP2B2    | 3 | 10388715 | 4 | 1.291039 |
| rs2289274    | ATP2B2    | 3 | 10388715 | 8 | 0.188247 |
| rs901865     | HRH1      | 3 | 11275707 | 4 | 0.645925 |
| rs901865     | HRH1      | 3 | 11275707 | 3 | 0.861655 |
| rs2067466    | HRH1      | 3 | 11275780 | 3 | 0.120612 |
| rs1809049    | HRH1      | 3 | 11277884 | 5 | 0.856134 |

|               |         |   |          |   |          |
|---------------|---------|---|----------|---|----------|
| rs346070      | HRH1    | 3 | 11278874 | 3 | 0.56989  |
| rs346070      | HRH1    | 3 | 11278874 | 4 | 1.260834 |
| SNP3-11375019 | ATG7    | 3 | 11375019 | 7 | 0.323853 |
| SNP3-11375019 | ATG7    | 3 | 11375019 | 1 | 3.574547 |
| rs1046593     | ATG7    | 3 | 11571402 | 4 | 5.91928  |
| rs408600      | C3orf31 | 3 | 11862991 | 7 | 0.499828 |
| rs408600      | C3orf31 | 3 | 11862991 | 5 | 2.086829 |
| rs408600      | C3orf31 | 3 | 11862991 | 4 | 0.208925 |
| rs2289708     | SYN2    | 3 | 12200353 | 3 | 0.199484 |
| rs709161      | TSEN2   | 3 | 12501188 | 4 | 1.660402 |
| rs709161      | TSEN2   | 3 | 12501188 | 2 | 3.986156 |
| rs709161      | TSEN2   | 3 | 12501188 | 8 | 3.632113 |
| rs709161      | TSEN2   | 3 | 12501188 | 5 | 5.010625 |
| SNP3-12519829 | TSEN2   | 3 | 12519829 | 1 | 4.697334 |
| rs2648307     | MKRN2   | 3 | 12588866 | 4 | 0.342191 |
| rs2648307     | MKRN2   | 3 | 12588866 | 1 | 0.045764 |
| rs2648307     | MKRN2   | 3 | 12588866 | 5 | 0.210348 |
| rs3773332     | TMEM40  | 3 | 12775797 | 3 | 0.171563 |
| rs2305398     | CAND2   | 3 | 12831856 | 1 | 1.157453 |
| rs2305398     | CAND2   | 3 | 12831856 | 3 | 0.494043 |
| rs4684883     | CAND2   | 3 | 12836586 | 1 | 1.683086 |
| rs3817121     | CAND2   | 3 | 12836608 | 1 | 3.030381 |
| rs1079361     | CAND2   | 3 | 12850880 | 3 | 0.394885 |
| rs1079361     | CAND2   | 3 | 12850880 | 4 | 4.37164  |
| rs2290311     | RPL32   | 3 | 12858071 | 3 | 0.133767 |
| rs2290311     | RPL32   | 3 | 12858071 | 4 | 3.99359  |
| rs2290311     | RPL32   | 3 | 12858071 | 8 | 1.355064 |
| rs665064      | NUP210  | 3 | 13342406 | 3 | 0.035996 |
| rs665064      | NUP210  | 3 | 13342406 | 5 | 1.320736 |
| rs665064      | NUP210  | 3 | 13342406 | 4 | 1.476017 |
| rs665064      | NUP210  | 3 | 13342406 | 8 | 3.782567 |
| rs3773302     | NUP210  | 3 | 13354400 | 3 | 0.640629 |
| rs3773302     | NUP210  | 3 | 13354400 | 4 | 0.35937  |
| rs3773302     | NUP210  | 3 | 13354400 | 5 | 0.093491 |
| rs2280085     | NUP210  | 3 | 13370475 | 4 | 0.203621 |
| SNP3-13374786 | NUP210  | 3 | 13374786 | 7 | 3.460049 |
| SNP3-13374786 | NUP210  | 3 | 13374786 | 5 | 8.659607 |
| SNP3-13374786 | NUP210  | 3 | 13374786 | 3 | 0.021336 |
| rs3732666     | FBLN2   | 3 | 13587937 | 7 | 0.222418 |
| rs3732666     | FBLN2   | 3 | 13587937 | 1 | 1.522704 |
| rs9843344     | FBLN2   | 3 | 13645537 | 4 | 0.134919 |
| rs9843344     | FBLN2   | 3 | 13645537 | 3 | 0.489279 |
| rs9843344     | FBLN2   | 3 | 13645537 | 5 | 0.237017 |
| rs4684968     | FBLN2   | 3 | 13645777 | 5 | 4.701262 |
| rs4684968     | FBLN2   | 3 | 13645777 | 3 | 0.227934 |
| rs4684968     | FBLN2   | 3 | 13645777 | 2 | 4.401241 |
| rs4684968     | FBLN2   | 3 | 13645777 | 4 | 0.606397 |

|            |           |   |          |   |          |
|------------|-----------|---|----------|---|----------|
| rs1061376  | FBLN2     | 3 | 13654336 | 7 | 0.392024 |
| rs1061376  | FBLN2     | 3 | 13654336 | 1 | 0.657678 |
| rs1061376  | FBLN2     | 3 | 13654336 | 5 | 1.16192  |
| rs4685076  | TMEM43    | 3 | 14149428 | 3 | 0.061907 |
| rs4685076  | TMEM43    | 3 | 14149428 | 7 | 0.040095 |
| rs4685076  | TMEM43    | 3 | 14149428 | 2 | 1.208154 |
| rs2341983  | SLC6A6    | 3 | 14502943 | 1 | 0.559226 |
| rs2341983  | SLC6A6    | 3 | 14502943 | 2 | 7.431448 |
| rs2341983  | SLC6A6    | 3 | 14502943 | 7 | 0.365941 |
| rs11713359 | SLC6A6    | 3 | 14503464 | 7 | 0.004633 |
| rs11713359 | SLC6A6    | 3 | 14503464 | 1 | 0.456819 |
| rs4685171  | GRIP2     | 3 | 14530220 | 3 | 0.616854 |
| rs11717411 | C3orf19   | 3 | 14688125 | 7 | 0.710499 |
| rs11717411 | C3orf19   | 3 | 14688125 | 6 | 0.178537 |
| rs11717411 | C3orf19   | 3 | 14688125 | 4 | 0.213992 |
| rs9821143  | C3orf20   | 3 | 14699417 | 7 | 2.406513 |
| rs34230332 | C3orf20   | 3 | 14700882 | 4 | 2.363243 |
| rs6765537  | C3orf20   | 3 | 14730576 | 8 | 1.384221 |
| rs6765537  | C3orf20   | 3 | 14730576 | 2 | 0.614621 |
| rs6765537  | C3orf20   | 3 | 14730576 | 1 | 1.104981 |
| rs6765537  | C3orf20   | 3 | 14730576 | 7 | 1.261006 |
| rs6765537  | C3orf20   | 3 | 14730576 | 5 | 1.446296 |
| rs6790129  | C3orf20   | 3 | 14730621 | 5 | 0.014392 |
| rs6790129  | C3orf20   | 3 | 14730621 | 7 | 0.084732 |
| rs6790129  | C3orf20   | 3 | 14730621 | 1 | 0.129884 |
| rs6790129  | C3orf20   | 3 | 14730621 | 2 | 0.539837 |
| rs6790129  | C3orf20   | 3 | 14730621 | 8 | 0.891515 |
| rs2164356  | FGD5      | 3 | 14914483 | 3 | 1.268216 |
| rs17536979 | NR2C2     | 3 | 15055700 | 7 | 0.346723 |
| rs4685240  | LOC344875 | 3 | 15178176 | 7 | 1.108846 |
| rs4685240  | LOC344875 | 3 | 15178176 | 5 | 0.587069 |
| rs11705926 | LOC344875 | 3 | 15181721 | 3 | 0.068744 |
| rs7639618  | LOC344875 | 3 | 15191433 | 4 | 0.738431 |
| rs1563415  | EAF1      | 3 | 15451015 | 3 | 0.577494 |
| rs1563415  | EAF1      | 3 | 15451015 | 4 | 1.687584 |
| rs1563415  | EAF1      | 3 | 15451015 | 1 | 3.328384 |
| rs1563415  | EAF1      | 3 | 15451015 | 5 | 5.716446 |
| rs17041129 | EAF1      | 3 | 15455730 | 7 | 0.188132 |
| rs6778562  | EAF1      | 3 | 15457779 | 1 | 5.561567 |
| rs6778562  | EAF1      | 3 | 15457779 | 6 | 6.874013 |
| rs3274     | COLQ      | 3 | 15466760 | 6 | 0.62461  |
| rs3274     | COLQ      | 3 | 15466760 | 4 | 1.003944 |
| rs10154896 | COLQ      | 3 | 15467640 | 1 | 5.607007 |
| rs983600   | ANKRD28   | 3 | 15684144 | 7 | 5.516518 |
| rs2271077  | GALNTL2   | 3 | 16236424 | 3 | 0.456221 |
| rs15767    | GALNTL2   | 3 | 16243978 | 5 | 0.236153 |
| rs15767    | GALNTL2   | 3 | 16243978 | 3 | 0.706483 |

|               |         |   |          |   |          |
|---------------|---------|---|----------|---|----------|
| rs15767       | GALNTL2 | 3 | 16243978 | 1 | 0.191511 |
| rs14210       | GALNTL2 | 3 | 16244070 | 1 | 0.901257 |
| rs14210       | GALNTL2 | 3 | 16244070 | 6 | 0.186881 |
| rs14210       | GALNTL2 | 3 | 16244070 | 2 | 2.624763 |
| rs14210       | GALNTL2 | 3 | 16244070 | 5 | 1.152211 |
| rs6777976     | OXNAD1  | 3 | 16302913 | 1 | 6.460334 |
| rs6777976     | OXNAD1  | 3 | 16302913 | 6 | 0.455765 |
| rs842424      | RFTN1   | 3 | 16332982 | 2 | 3.654417 |
| rs842424      | RFTN1   | 3 | 16332982 | 1 | 0.376454 |
| rs842424      | RFTN1   | 3 | 16332982 | 6 | 0.251018 |
| SNP3-16339958 | RFTN1   | 3 | 16339958 | 1 | 1.309311 |
| SNP3-16339958 | RFTN1   | 3 | 16339958 | 2 | 3.442817 |
| SNP3-16339958 | RFTN1   | 3 | 16339958 | 6 | 3.304168 |
| rs7653834     | PLCL2   | 3 | 17026332 | 7 | 1.287412 |
| rs7653834     | PLCL2   | 3 | 17026332 | 3 | 0.239317 |
| rs11549706    | PLCL2   | 3 | 17106505 | 1 | 4.045006 |
| rs11549706    | PLCL2   | 3 | 17106505 | 3 | 1.144135 |
| rs11549706    | PLCL2   | 3 | 17106505 | 8 | 0.905469 |
| rs1138454     | TBC1D5  | 3 | 17183271 | 4 | 0.233073 |
| rs1138454     | TBC1D5  | 3 | 17183271 | 6 | 3.492804 |
| rs1138454     | TBC1D5  | 3 | 17183271 | 5 | 2.779921 |
| rs1138454     | TBC1D5  | 3 | 17183271 | 8 | 0.115994 |
| SNP3-19934760 | EFHB    | 3 | 19934760 | 3 | 2.139653 |
| SNP3-19934760 | EFHB    | 3 | 19934760 | 2 | 2.79087  |
| SNP3-19934760 | EFHB    | 3 | 19934760 | 5 | 0.451088 |
| rs2929362     | EFHB    | 3 | 19936335 | 1 | 3.337523 |
| rs17180771    | EFHB    | 3 | 19950143 | 3 | 0.75221  |
| rs2929349     | EFHB    | 3 | 19950586 | 2 | 5.744276 |
| rs2929349     | EFHB    | 3 | 19950586 | 5 | 0.173884 |
| rs8682        | RAB5A   | 3 | 20001413 | 6 | 0.694836 |
| rs3021408     | PCAF    | 3 | 20088834 | 6 | 3.433481 |
| rs3021408     | PCAF    | 3 | 20088834 | 7 | 2.148387 |
| rs1052930     | SGOL1   | 3 | 20187193 | 6 | 2.711068 |
| rs1052930     | SGOL1   | 3 | 20187193 | 7 | 0.601099 |
| rs826371      | THRB    | 3 | 24138649 | 4 | 0.149325 |
| rs826371      | THRB    | 3 | 24138649 | 5 | 0.209626 |
| rs3752874     | THRB    | 3 | 24159999 | 4 | 0.639704 |
| rs3752874     | THRB    | 3 | 24159999 | 6 | 0.534543 |
| rs3752874     | THRB    | 3 | 24159999 | 7 | 2.745291 |
| rs11129270    | NEK10   | 3 | 27232947 | 1 | 3.387799 |
| rs3213930     | NEK10   | 3 | 27272820 | 7 | 1.835605 |
| rs3213930     | NEK10   | 3 | 27272820 | 5 | 0.077506 |
| rs11129280    | NEK10   | 3 | 27301101 | 5 | 0.275432 |
| rs11129280    | NEK10   | 3 | 27301101 | 7 | 0.850548 |
| rs11129280    | NEK10   | 3 | 27301101 | 1 | 3.773762 |
| rs11129280    | NEK10   | 3 | 27301101 | 3 | 1.496449 |
| rs10510594    | NEK10   | 3 | 27301455 | 5 | 0.327307 |

|               |           |   |          |   |          |
|---------------|-----------|---|----------|---|----------|
| rs10510594    | NEK10     | 3 | 27301455 | 3 | 0.841063 |
| rs10510594    | NEK10     | 3 | 27301455 | 1 | 4.373832 |
| rs10510594    | NEK10     | 3 | 27301455 | 7 | 0.859869 |
| rs10510592    | NEK10     | 3 | 27307824 | 5 | 0.686554 |
| rs10510592    | NEK10     | 3 | 27307824 | 7 | 0.891465 |
| rs10510592    | NEK10     | 3 | 27307824 | 1 | 4.939835 |
| rs10510592    | NEK10     | 3 | 27307824 | 3 | 0.410863 |
| rs3736312     | SLC4A7    | 3 | 27417340 | 5 | 6.902005 |
| rs3755652     | SLC4A7    | 3 | 27447940 | 5 | 0.295613 |
| rs1563656     | ZCWPW2    | 3 | 28495421 | 8 | 0.271918 |
| rs1563656     | ZCWPW2    | 3 | 28495421 | 3 | 0.523821 |
| rs13100556    | ZCWPW2    | 3 | 28508662 | 1 | 4.758272 |
| rs3816573     | ZCWPW2    | 3 | 28541480 | 3 | 0.289088 |
| rs3816573     | ZCWPW2    | 3 | 28541480 | 8 | 1.130836 |
| rs6791484     | LOC339897 | 3 | 31198053 | 5 | 1.425675 |
| rs17027217    | LOC339897 | 3 | 31198317 | 1 | 2.064355 |
| rs17027217    | LOC339897 | 3 | 31198317 | 2 | 2.399617 |
| rs17027217    | LOC339897 | 3 | 31198317 | 6 | 1.0771   |
| rs17027957    | OSBPL10   | 3 | 31700482 | 5 | 0.630785 |
| rs11129475    | LOC728665 | 3 | 32005548 | 3 | 0.164507 |
| rs12497202    | KRT18P15  | 3 | 32275640 | 7 | 1.825153 |
| rs12497202    | KRT18P15  | 3 | 32275640 | 2 | 0.412597 |
| rs12497202    | KRT18P15  | 3 | 32275640 | 4 | 0.699994 |
| rs12497202    | KRT18P15  | 3 | 32275640 | 1 | 0.03257  |
| rs6550143     | LOC391526 | 3 | 32637535 | 7 | 5.214564 |
| rs6550143     | LOC391526 | 3 | 32637535 | 6 | 1.621899 |
| rs11711396    | FLJ45032  | 3 | 33107760 | 2 | 6.240029 |
| rs17192791    | FBXL2     | 3 | 33381129 | 5 | 7.684918 |
| SNP3-33854774 | PDCD6IP   | 3 | 33854774 | 1 | 5.669405 |
| SNP3-33854774 | PDCD6IP   | 3 | 33854774 | 4 | 0.151991 |
| SNP3-33854774 | PDCD6IP   | 3 | 33854774 | 5 | 5.246933 |
| SNP3-33854774 | PDCD6IP   | 3 | 33854774 | 2 | 0.093819 |
| SNP3-33854774 | PDCD6IP   | 3 | 33854774 | 7 | 0.283897 |
| rs9813017     | PDCD6IP   | 3 | 33868991 | 1 | 3.950037 |
| rs9813017     | PDCD6IP   | 3 | 33868991 | 4 | 0.933046 |
| rs1127732     | PDCD6IP   | 3 | 33880570 | 5 | 0.84443  |
| rs1127732     | PDCD6IP   | 3 | 33880570 | 2 | 4.49291  |
| rs9860326     | NULL      | 3 | 35658108 | 3 | 0.295144 |
| rs3821447     | ARPP-21   | 3 | 35701752 | 3 | 0.134739 |
| rs45549732    | STAC      | 3 | 36502724 | 4 | 0.585643 |
| rs2176995     | STAC      | 3 | 36563891 | 3 | 0.498545 |
| rs2176995     | STAC      | 3 | 36563891 | 5 | 0.612279 |
| rs2176995     | STAC      | 3 | 36563891 | 1 | 6.117273 |
| rs9311135     | LOC645548 | 3 | 36784123 | 3 | 0.560204 |
| rs1799977     | MLH1      | 3 | 37028572 | 3 | 1.16178  |
| rs1799977     | MLH1      | 3 | 37028572 | 1 | 4.323227 |
| rs1799977     | MLH1      | 3 | 37028572 | 6 | 1.542113 |



|               |          |   |          |   |          |
|---------------|----------|---|----------|---|----------|
| rs1799977     | MLH1     | 3 | 37028572 | 5 | 0.686655 |
| rs1799977     | MLH1     | 3 | 37028572 | 4 | 2.489652 |
| rs12630114    | DLEC1    | 3 | 38126735 | 3 | 0.328607 |
| rs12630114    | DLEC1    | 3 | 38126735 | 1 | 1.961638 |
| rs12630114    | DLEC1    | 3 | 38126735 | 8 | 1.653639 |
| rs12630114    | DLEC1    | 3 | 38126735 | 4 | 1.230824 |
| SNP3-38142099 | ACAA1    | 3 | 38142099 | 4 | 0.782912 |
| rs156265      | ACAA1    | 3 | 38145814 | 4 | 3.996853 |
| rs156265      | ACAA1    | 3 | 38145814 | 3 | 0.692317 |
| rs156265      | ACAA1    | 3 | 38145814 | 1 | 0.307789 |
| rs2073714     | SLC22A14 | 3 | 38322855 | 8 | 0.308864 |
| rs818819      | SLC22A14 | 3 | 38325483 | 8 | 1.614816 |
| rs818818      | SLC22A14 | 3 | 38325523 | 8 | 0.448198 |
| rs818817      | SLC22A14 | 3 | 38325547 | 8 | 0.972975 |
| rs240033      | SLC22A14 | 3 | 38332965 | 5 | 0.370577 |
| rs1805124     | SCN5A    | 3 | 38620424 | 1 | 0.948835 |
| SNP3-38743304 | SCN10A   | 3 | 38743304 | 1 | 1.541934 |
| rs17852414    | WDR48    | 3 | 39110555 | 8 | 0.580835 |
| rs17852414    | WDR48    | 3 | 39110555 | 6 | 2.525643 |
| rs1112438     | TTC21A   | 3 | 39127349 | 5 | 2.326121 |
| rs1112438     | TTC21A   | 3 | 39127349 | 3 | 1.407271 |
| rs1112438     | TTC21A   | 3 | 39127349 | 6 | 0.985552 |
| rs1112438     | TTC21A   | 3 | 39127349 | 8 | 2.155894 |
| rs1274972     | TTC21A   | 3 | 39136460 | 3 | 0.635742 |
| rs1274972     | TTC21A   | 3 | 39136460 | 6 | 2.474889 |
| rs1274972     | TTC21A   | 3 | 39136460 | 8 | 6.292764 |
| rs1274972     | TTC21A   | 3 | 39136460 | 5 | 4.146414 |
| rs1274971     | TTC21A   | 3 | 39136468 | 5 | 0.114773 |
| rs1274971     | TTC21A   | 3 | 39136468 | 3 | 1.027529 |
| rs1274971     | TTC21A   | 3 | 39136468 | 6 | 3.592647 |
| rs1274971     | TTC21A   | 3 | 39136468 | 8 | 5.295496 |
| rs1274957     | AXUD1    | 3 | 39160081 | 3 | 0.757294 |
| rs1274957     | AXUD1    | 3 | 39160081 | 6 | 0.691793 |
| rs1274957     | AXUD1    | 3 | 39160081 | 5 | 5.824992 |
| rs1274957     | AXUD1    | 3 | 39160081 | 8 | 6.209322 |
| rs784517      | AXUD1    | 3 | 39161732 | 6 | 1.839398 |
| rs784517      | AXUD1    | 3 | 39161732 | 5 | 3.216544 |
| rs784517      | AXUD1    | 3 | 39161732 | 3 | 0.707935 |
| rs11710546    | CX3CR1   | 3 | 39281223 | 6 | 0.541053 |
| rs11710546    | CX3CR1   | 3 | 39281223 | 1 | 0.33528  |
| rs3732378     | CX3CR1   | 3 | 39282166 | 6 | 0.325343 |
| rs3732379     | CX3CR1   | 3 | 39282260 | 6 | 0.693123 |
| rs3732379     | CX3CR1   | 3 | 39282260 | 1 | 0.358144 |
| rs3772146     | RPSA     | 3 | 39423208 | 3 | 1.139259 |
| rs3772146     | RPSA     | 3 | 39423208 | 8 | 0.242184 |
| rs3772146     | RPSA     | 3 | 39423208 | 1 | 0.055733 |
| rs3772146     | RPSA     | 3 | 39423208 | 2 | 0.364636 |

|               |        |   |          |   |          |
|---------------|--------|---|----------|---|----------|
| rs1317317     | MYRIP  | 3 | 40206887 | 7 | 0.620595 |
| rs4618168     | MYRIP  | 3 | 40261021 | 2 | 0.63959  |
| rs4618168     | MYRIP  | 3 | 40261021 | 7 | 0.805542 |
| rs4618168     | MYRIP  | 3 | 40261021 | 1 | 0.432006 |
| rs13081294    | MYRIP  | 3 | 40276277 | 1 | 0.686478 |
| rs1047855     | ENTPD3 | 3 | 40443900 | 1 | 0.548049 |
| rs1047855     | ENTPD3 | 3 | 40443900 | 2 | 3.334601 |
| rs4602359     | ZNF621 | 3 | 40554361 | 1 | 0.290677 |
| rs4602359     | ZNF621 | 3 | 40554361 | 6 | 2.130739 |
| SNP3-41731990 | ULK4   | 3 | 41731990 | 7 | 5.580559 |
| SNP3-41731990 | ULK4   | 3 | 41731990 | 3 | 0.530356 |
| rs1716975     | ULK4   | 3 | 41935010 | 7 | 1.065487 |
| rs1716975     | ULK4   | 3 | 41935010 | 3 | 0.860583 |
| rs2272007     | ULK4   | 3 | 41971140 | 3 | 0.281926 |
| rs7372751     | TRAK1  | 3 | 42227928 | 6 | 0.312319 |
| rs7372751     | TRAK1  | 3 | 42227928 | 8 | 7.568364 |
| rs7372751     | TRAK1  | 3 | 42227928 | 1 | 5.272885 |
| rs7372751     | TRAK1  | 3 | 42227928 | 3 | 0.036346 |
| rs7372751     | TRAK1  | 3 | 42227928 | 4 | 0.057134 |
| SNP3-42654781 | NKTR   | 3 | 42654781 | 8 | 3.295303 |
| rs2290976     | ZBTB47 | 3 | 42683636 | 8 | 2.515534 |
| rs123509      | KBTBD5 | 3 | 42708472 | 5 | 0.751022 |
| rs123509      | KBTBD5 | 3 | 42708472 | 1 | 1.168205 |
| rs123509      | KBTBD5 | 3 | 42708472 | 7 | 0.113584 |
| rs123509      | KBTBD5 | 3 | 42708472 | 3 | 0.458841 |
| rs3846062     | KBTBD5 | 3 | 42708671 | 3 | 0.104571 |
| rs3846062     | KBTBD5 | 3 | 42708671 | 1 | 0.390653 |
| rs3846062     | KBTBD5 | 3 | 42708671 | 5 | 1.353915 |
| SNP3-42710154 | HHATL  | 3 | 42710154 | 1 | 1.177426 |
| SNP3-42710154 | HHATL  | 3 | 42710154 | 5 | 1.485252 |
| SNP3-42710154 | HHATL  | 3 | 42710154 | 3 | 0.617826 |
| SNP3-42710154 | HHATL  | 3 | 42710154 | 6 | 0.109331 |
| rs339697      | HHATL  | 3 | 42710278 | 5 | 4.000796 |
| rs17238798    | CCDC13 | 3 | 42774769 | 7 | 0.905137 |
| rs17238798    | CCDC13 | 3 | 42774769 | 2 | 0.881605 |
| rs17238798    | CCDC13 | 3 | 42774769 | 6 | 4.747493 |
| rs17238798    | CCDC13 | 3 | 42774769 | 1 | 0.776267 |
| rs2228468     | CCBP2  | 3 | 42882116 | 3 | 0.892375 |
| rs2228468     | CCBP2  | 3 | 42882116 | 5 | 2.305637 |
| rs2228468     | CCBP2  | 3 | 42882116 | 8 | 3.508767 |
| rs2228468     | CCBP2  | 3 | 42882116 | 7 | 1.520006 |
| rs1366046     | CCBP2  | 3 | 42883779 | 5 | 2.808191 |
| rs1366046     | CCBP2  | 3 | 42883779 | 3 | 0.959637 |
| rs1366046     | CCBP2  | 3 | 42883779 | 7 | 1.397572 |
| rs1366046     | CCBP2  | 3 | 42883779 | 2 | 3.592435 |
| rs1366046     | CCBP2  | 3 | 42883779 | 6 | 0.648293 |
| rs1366046     | CCBP2  | 3 | 42883779 | 8 | 0.079085 |

|               |           |   |          |   |          |
|---------------|-----------|---|----------|---|----------|
| rs12494055    | CYP8B1    | 3 | 42888849 | 3 | 0.138312 |
| rs3732860     | CYP8B1    | 3 | 42889016 | 3 | 1.876538 |
| rs3732860     | CYP8B1    | 3 | 42889016 | 6 | 1.906486 |
| rs3732860     | CYP8B1    | 3 | 42889016 | 8 | 1.10116  |
| rs1427801     | ZNF662    | 3 | 42931277 | 4 | 3.572733 |
| rs834579      | ZNF662    | 3 | 42931988 | 5 | 0.635765 |
| rs834579      | ZNF662    | 3 | 42931988 | 2 | 4.183078 |
| rs2948619     | LOC729085 | 3 | 43049434 | 6 | 0.885241 |
| rs2948619     | LOC729085 | 3 | 43049434 | 5 | 3.555872 |
| rs2948619     | LOC729085 | 3 | 43049434 | 8 | 2.410478 |
| rs2948619     | LOC729085 | 3 | 43049434 | 1 | 0.114893 |
| rs2936817     | LOC729085 | 3 | 43049438 | 5 | 1.494641 |
| rs2936817     | LOC729085 | 3 | 43049438 | 8 | 0.01212  |
| rs2936817     | LOC729085 | 3 | 43049438 | 6 | 1.30083  |
| rs536119      | LOC729085 | 3 | 43070105 | 4 | 0.449925 |
| rs3732858     | LOC729085 | 3 | 43072769 | 1 | 5.966705 |
| rs17409162    | TMEM16K   | 3 | 43566331 | 4 | 0.766736 |
| SNP3-43593284 | TMEM16K   | 3 | 43593284 | 4 | 3.88387  |
| rs9833423     | FLJ36157  | 3 | 44258676 | 3 | 2.410601 |
| rs9833423     | FLJ36157  | 3 | 44258676 | 1 | 2.942045 |
| rs7645375     | FLJ36157  | 3 | 44258812 | 1 | 1.297042 |
| rs11130025    | C3orf23   | 3 | 44355212 | 8 | 4.624432 |
| rs11130025    | C3orf23   | 3 | 44355212 | 4 | 4.20726  |
| rs11130025    | C3orf23   | 3 | 44355212 | 1 | 1.930563 |
| GA003188      | C3orf23   | 3 | 44376259 | 3 | 0.758601 |
| GA003188      | C3orf23   | 3 | 44376259 | 4 | 0.290064 |
| GA003188      | C3orf23   | 3 | 44376259 | 1 | 5.457149 |
| rs4610267     | ZNF445    | 3 | 44460918 | 3 | 0.548822 |
| rs4610267     | ZNF445    | 3 | 44460918 | 2 | 0.23895  |
| rs4610267     | ZNF445    | 3 | 44460918 | 8 | 0.767207 |
| rs4610267     | ZNF445    | 3 | 44460918 | 5 | 3.447105 |
| rs4610267     | ZNF445    | 3 | 44460918 | 1 | 0.526607 |
| rs4610267     | ZNF445    | 3 | 44460918 | 4 | 0.307328 |
| rs6441857     | ZNF167    | 3 | 44571900 | 7 | 0.867578 |
| rs6441857     | ZNF167    | 3 | 44571900 | 3 | 0.033686 |
| rs6441857     | ZNF167    | 3 | 44571900 | 4 | 0.023456 |
| rs6441857     | ZNF167    | 3 | 44571900 | 1 | 0.956943 |
| rs6441857     | ZNF167    | 3 | 44571900 | 8 | 0.381298 |
| rs2034476     | ZNF167    | 3 | 44587899 | 4 | 2.668892 |
| rs2034476     | ZNF167    | 3 | 44587899 | 1 | 0.029829 |
| rs2034476     | ZNF167    | 3 | 44587899 | 3 | 0.682267 |
| rs2034476     | ZNF167    | 3 | 44587899 | 2 | 5.580068 |
| rs2034476     | ZNF167    | 3 | 44587899 | 7 | 0.390089 |
| rs13100959    | ZNF197    | 3 | 44641610 | 2 | 2.397785 |
| rs13100959    | ZNF197    | 3 | 44641610 | 7 | 1.035894 |
| rs13100959    | ZNF197    | 3 | 44641610 | 3 | 0.706876 |
| rs13100959    | ZNF197    | 3 | 44641610 | 8 | 4.909032 |

|               |         |   |          |   |          |
|---------------|---------|---|----------|---|----------|
| rs13100959    | ZNF197  | 3 | 44641610 | 1 | 0.932862 |
| rs13100959    | ZNF197  | 3 | 44641610 | 4 | 0.424747 |
| rs17376517    | ZNF502  | 3 | 44740225 | 8 | 0.202663 |
| rs4682752     | ZNF501  | 3 | 44750966 | 4 | 6.369764 |
| rs4682752     | ZNF501  | 3 | 44750966 | 1 | 0.474695 |
| rs4682752     | ZNF501  | 3 | 44750966 | 7 | 0.619904 |
| rs2271087     | TGM4    | 3 | 44904291 | 1 | 3.487788 |
| rs2271087     | TGM4    | 3 | 44904291 | 5 | 3.454024 |
| rs2271087     | TGM4    | 3 | 44904291 | 7 | 3.963967 |
| SNP3-44923594 | TGM4    | 3 | 44923594 | 2 | 1.288632 |
| SNP3-44923594 | TGM4    | 3 | 44923594 | 4 | 0.647214 |
| SNP3-44923594 | TGM4    | 3 | 44923594 | 1 | 0.630967 |
| SNP3-44923594 | TGM4    | 3 | 44923594 | 5 | 0.189595 |
| rs1395388     | TGM4    | 3 | 44923678 | 4 | 0.062952 |
| rs13963       | CLEC3B  | 3 | 45052127 | 2 | 1.881569 |
| rs13963       | CLEC3B  | 3 | 45052127 | 6 | 0.763822 |
| rs13963       | CLEC3B  | 3 | 45052127 | 1 | 1.307658 |
| rs13963       | CLEC3B  | 3 | 45052127 | 4 | 0.857478 |
| rs13963       | CLEC3B  | 3 | 45052127 | 5 | 0.997052 |
| rs11063       | CDCP1   | 3 | 45099173 | 8 | 5.229958 |
| SNP3-45109826 | CDCP1   | 3 | 45109826 | 1 | 0.104535 |
| rs33749       | TMEM158 | 3 | 45241559 | 8 | 5.76793  |
| rs28413188    | LARS2   | 3 | 45405155 | 6 | 1.024002 |
| rs267237      | LIMD1   | 3 | 45612257 | 2 | 1.039569 |
| rs267237      | LIMD1   | 3 | 45612257 | 4 | 1.117585 |
| rs267237      | LIMD1   | 3 | 45612257 | 1 | 0.067694 |
| rs267237      | LIMD1   | 3 | 45612257 | 7 | 0.411908 |
| rs267237      | LIMD1   | 3 | 45612257 | 6 | 0.457935 |
| rs267237      | LIMD1   | 3 | 45612257 | 5 | 6.745499 |
| rs2251109     | SLC6A20 | 3 | 45771955 | 5 | 0.456105 |
| rs2251109     | SLC6A20 | 3 | 45771955 | 1 | 2.181145 |
| rs17213127    | SLC6A20 | 3 | 45773230 | 1 | 4.820834 |
| rs1994491     | FYCO1   | 3 | 45935424 | 6 | 0.557272 |
| rs3796373     | FYCO1   | 3 | 45935855 | 8 | 7.104936 |
| rs3796373     | FYCO1   | 3 | 45935855 | 5 | 6.025072 |
| rs7652331     | FYCO1   | 3 | 45937756 | 4 | 0.72354  |
| rs7652331     | FYCO1   | 3 | 45937756 | 6 | 6.777534 |
| rs6441934     | FYCO1   | 3 | 45937806 | 4 | 6.446305 |
| rs13079869    | FYCO1   | 3 | 45983091 | 6 | 0.359992 |
| rs3796375     | FYCO1   | 3 | 45983794 | 5 | 0.20411  |
| rs3796375     | FYCO1   | 3 | 45983794 | 8 | 2.592859 |
| rs3796375     | FYCO1   | 3 | 45983794 | 6 | 0.036458 |
| rs3796375     | FYCO1   | 3 | 45983794 | 4 | 0.649119 |
| rs3796375     | FYCO1   | 3 | 45983794 | 2 | 2.840836 |
| SNP3-45984491 | FYCO1   | 3 | 45984491 | 6 | 2.464841 |
| rs4682801     | FYCO1   | 3 | 45996222 | 4 | 0.337686 |
| rs4682801     | FYCO1   | 3 | 45996222 | 7 | 0.737668 |

|               |         |   |          |   |          |
|---------------|---------|---|----------|---|----------|
| rs3136667     | CCR1    | 3 | 46219288 | 1 | 1.188906 |
| rs2037391     | RTP3    | 3 | 46514527 | 3 | 0.756549 |
| SNP3-46561626 | LRRC2   | 3 | 46561626 | 1 | 1.877183 |
| SNP3-46595764 | TDGF1   | 3 | 46595764 | 8 | 6.318432 |
| SNP3-46595764 | TDGF1   | 3 | 46595764 | 3 | 2.714701 |
| SNP3-46595764 | TDGF1   | 3 | 46595764 | 5 | 2.304659 |
| SNP3-46595764 | TDGF1   | 3 | 46595764 | 1 | 1.702727 |
| SNP3-46595764 | TDGF1   | 3 | 46595764 | 6 | 2.486319 |
| SNP3-46595764 | TDGF1   | 3 | 46595764 | 7 | 0.635849 |
| SNP3-46595764 | TDGF1   | 3 | 46595764 | 2 | 1.063908 |
| rs7625303     | ALS2CL  | 3 | 46688461 | 3 | 0.149694 |
| SNP3-46759471 | TESSP5  | 3 | 46759471 | 7 | 0.863806 |
| rs2305637     | NBEAL2  | 3 | 47020850 | 7 | 0.164182 |
| rs2305637     | NBEAL2  | 3 | 47020850 | 4 | 0.398066 |
| SNP3-47257307 | KIF9    | 3 | 47257307 | 1 | 4.813742 |
| SNP3-47257307 | KIF9    | 3 | 47257307 | 3 | 0.955755 |
| SNP3-47257307 | KIF9    | 3 | 47257307 | 4 | 0.618274 |
| SNP3-47257307 | KIF9    | 3 | 47257307 | 5 | 6.359224 |
| SNP3-47257307 | KIF9    | 3 | 47257307 | 6 | 0.815934 |
| SNP3-47257307 | KIF9    | 3 | 47257307 | 8 | 5.071781 |
| rs295458      | KLHL18  | 3 | 47360589 | 6 | 0.194232 |
| rs295458      | KLHL18  | 3 | 47360589 | 1 | 5.359957 |
| rs295458      | KLHL18  | 3 | 47360589 | 3 | 1.040636 |
| rs295458      | KLHL18  | 3 | 47360589 | 4 | 0.449146 |
| rs295458      | KLHL18  | 3 | 47360589 | 8 | 5.349038 |
| rs295458      | KLHL18  | 3 | 47360589 | 5 | 3.505273 |
| rs1531875     | PTPN23  | 3 | 47427790 | 5 | 0.078818 |
| rs1531875     | PTPN23  | 3 | 47427790 | 1 | 4.413108 |
| rs1531875     | PTPN23  | 3 | 47427790 | 8 | 7.090398 |
| rs1531875     | PTPN23  | 3 | 47427790 | 3 | 0.122648 |
| rs1531875     | PTPN23  | 3 | 47427790 | 4 | 1.350295 |
| rs1531875     | PTPN23  | 3 | 47427790 | 6 | 0.582971 |
| rs1875103     | MAP4    | 3 | 47869105 | 4 | 0.023422 |
| SNP3-47933041 | MAP4    | 3 | 47933041 | 8 | 3.327444 |
| rs9862913     | MAP4    | 3 | 47991176 | 4 | 0.3292   |
| rs11711953    | MAP4    | 3 | 48015287 | 6 | 0.598888 |
| rs11718329    | ZNF589  | 3 | 48284832 | 6 | 1.685448 |
| rs11718329    | ZNF589  | 3 | 48284832 | 4 | 5.066583 |
| rs11718350    | SPINK8  | 3 | 48335996 | 4 | 1.78135  |
| rs11718350    | SPINK8  | 3 | 48335996 | 6 | 2.232299 |
| rs12486046    | TREX1   | 3 | 48482186 | 5 | 0.729121 |
| rs2228561     | COL7A1  | 3 | 48603018 | 3 | 1.089085 |
| rs9834639     | TMEM89  | 3 | 48634013 | 3 | 0.041358 |
| rs13324142    | SLC26A6 | 3 | 48644451 | 3 | 0.933038 |
| rs6773261     | CELSR3  | 3 | 48650068 | 3 | 4.786842 |
| rs6773261     | CELSR3  | 3 | 48650068 | 7 | 0.15014  |
| rs3821875     | CELSR3  | 3 | 48672658 | 3 | 0.011762 |

|               |           |   |          |   |          |
|---------------|-----------|---|----------|---|----------|
| rs3087866     | DALRD3    | 3 | 49029696 | 7 | 0.013972 |
| rs3087866     | DALRD3    | 3 | 49029696 | 5 | 0.051577 |
| rs11552724    | USP19     | 3 | 49131477 | 3 | 0.118443 |
| rs4279134     | USP19     | 3 | 49131680 | 6 | 0.699873 |
| rs4279134     | USP19     | 3 | 49131680 | 7 | 0.507077 |
| rs4279134     | USP19     | 3 | 49131680 | 3 | 0.60622  |
| rs4279134     | USP19     | 3 | 49131680 | 5 | 4.671595 |
| rs34759087    | LAMB2     | 3 | 49137288 | 7 | 0.349207 |
| rs34759087    | LAMB2     | 3 | 49137288 | 2 | 0.163154 |
| rs1134043     | CCDC71    | 3 | 49175141 | 3 | 0.043265 |
| rs9837625     | LOC646498 | 3 | 49190970 | 3 | 0.855689 |
| rs12715434    | CCDC36    | 3 | 49270029 | 3 | 0.619929 |
| rs7626076     | STGC3     | 3 | 49273143 | 5 | 0.301201 |
| rs13077498    | C3orf62   | 3 | 49288982 | 3 | 0.006426 |
| rs3448        | RHOA      | 3 | 49371755 | 5 | 0.373296 |
| rs3448        | RHOA      | 3 | 49371755 | 7 | 0.171372 |
| rs3448        | RHOA      | 3 | 49371755 | 6 | 0.201607 |
| rs1464569     | NICN1     | 3 | 49435354 | 7 | 1.15368  |
| rs1464569     | NICN1     | 3 | 49435354 | 6 | 1.624363 |
| rs1464569     | NICN1     | 3 | 49435354 | 5 | 0.865241 |
| rs4855839     | DAG1      | 3 | 49482851 | 3 | 0.699781 |
| rs4855839     | DAG1      | 3 | 49482851 | 5 | 0.176901 |
| SNP3-49664214 | BSN       | 3 | 49664214 | 6 | 1.031811 |
| SNP3-49664214 | BSN       | 3 | 49664214 | 1 | 0.821062 |
| SNP3-49664214 | BSN       | 3 | 49664214 | 7 | 0.937833 |
| SNP3-49664214 | BSN       | 3 | 49664214 | 3 | 0.723549 |
| rs11709525    | BSN       | 3 | 49665500 | 7 | 0.046471 |
| rs11709525    | BSN       | 3 | 49665500 | 3 | 0.706057 |
| rs9858542     | BSN       | 3 | 49676987 | 6 | 0.029886 |
| rs9823546     | BSN       | 3 | 49680516 | 4 | 0.279406 |
| rs9823546     | BSN       | 3 | 49680516 | 7 | 0.125759 |
| rs9823546     | BSN       | 3 | 49680516 | 3 | 0.039368 |
| rs9823546     | BSN       | 3 | 49680516 | 6 | 0.9949   |
| rs9823546     | BSN       | 3 | 49680516 | 1 | 1.941916 |
| GA003289      | BSN       | 3 | 49681742 | 3 | 0.903362 |
| GA003289      | BSN       | 3 | 49681742 | 1 | 2.967221 |
| GA003289      | BSN       | 3 | 49681742 | 5 | 0.530381 |
| GA003289      | BSN       | 3 | 49681742 | 7 | 0.823949 |
| GA003289      | BSN       | 3 | 49681742 | 4 | 0.487043 |
| rs1060962     | BSN       | 3 | 49683506 | 7 | 0.676182 |
| rs1060962     | BSN       | 3 | 49683506 | 1 | 3.119074 |
| rs1060962     | BSN       | 3 | 49683506 | 3 | 0.220629 |
| rs1060962     | BSN       | 3 | 49683506 | 5 | 0.104074 |
| rs1060962     | BSN       | 3 | 49683506 | 4 | 1.251421 |
| rs1060970     | BSN       | 3 | 49683773 | 1 | 0.082224 |
| rs1060970     | BSN       | 3 | 49683773 | 4 | 0.446979 |
| rs1060970     | BSN       | 3 | 49683773 | 7 | 0.471784 |

|               |           |   |          |   |          |
|---------------|-----------|---|----------|---|----------|
| rs1131095     | APEH      | 3 | 49689229 | 3 | 0.754605 |
| rs1131095     | APEH      | 3 | 49689229 | 6 | 1.087105 |
| rs1131095     | APEH      | 3 | 49689229 | 7 | 0.7282   |
| rs1131095     | APEH      | 3 | 49689229 | 1 | 1.599442 |
| rs1131095     | APEH      | 3 | 49689229 | 4 | 0.762273 |
| SNP3-49724980 | RNF123    | 3 | 49724980 | 3 | 0.271785 |
| rs7628207     | AMIGO3    | 3 | 49729974 | 5 | 0.216575 |
| rs7628207     | AMIGO3    | 3 | 49729974 | 6 | 0.636399 |
| rs7629936     | LOC389118 | 3 | 49811711 | 5 | 1.212298 |
| rs6797500     | CAMKV     | 3 | 49871622 | 3 | 0.042188 |
| rs6797500     | CAMKV     | 3 | 49871622 | 1 | 0.196285 |
| rs2681781     | CAMKV     | 3 | 49873277 | 3 | 0.866662 |
| rs2681781     | CAMKV     | 3 | 49873277 | 6 | 1.935131 |
| rs1317215     | LOC389120 | 3 | 49887295 | 3 | 0.734617 |
| rs1317215     | LOC389120 | 3 | 49887295 | 1 | 1.022402 |
| rs2230590     | MST1R     | 3 | 49911106 | 6 | 0.408194 |
| rs2230590     | MST1R     | 3 | 49911106 | 3 | 0.800135 |
| rs868891      | MON1A     | 3 | 49924075 | 1 | 4.444382 |
| rs868891      | MON1A     | 3 | 49924075 | 6 | 5.972142 |
| rs2023953     | RBM6      | 3 | 50078921 | 3 | 0.271226 |
| rs1138536     | RBM5      | 3 | 50128360 | 1 | 3.911243 |
| rs12629572    | C3orf45   | 3 | 50299676 | 7 | 0.437072 |
| rs12629572    | C3orf45   | 3 | 50299676 | 8 | 0.917398 |
| rs1076872     | IFRD2     | 3 | 50304830 | 6 | 0.431664 |
| rs1076872     | IFRD2     | 3 | 50304830 | 7 | 7.00606  |
| rs1076872     | IFRD2     | 3 | 50304830 | 3 | 0.815516 |
| rs1076872     | IFRD2     | 3 | 50304830 | 1 | 4.845392 |
| rs1076872     | IFRD2     | 3 | 50304830 | 4 | 1.104702 |
| rs13100173    | HYAL3     | 3 | 50307701 | 3 | 0.547651 |
| rs13100173    | HYAL3     | 3 | 50307701 | 1 | 0.932595 |
| rs13100173    | HYAL3     | 3 | 50307701 | 2 | 0.130676 |
| rs13100173    | HYAL3     | 3 | 50307701 | 4 | 0.369058 |
| rs13100173    | HYAL3     | 3 | 50307701 | 6 | 7.802753 |
| rs13100173    | HYAL3     | 3 | 50307701 | 8 | 9.61539  |
| rs28365992    | HYAL1     | 3 | 50316000 | 7 | 1.934665 |
| rs4687569     | RBM15B    | 3 | 51407935 | 6 | 5.729859 |
| rs4687569     | RBM15B    | 3 | 51407935 | 8 | 0.789416 |
| rs28547534    | PARP3     | 3 | 51953260 | 2 | 5.42173  |
| rs11924827    | PCBP4     | 3 | 51966655 | 5 | 5.261898 |
| rs11924827    | PCBP4     | 3 | 51966655 | 2 | 0.455395 |
| rs11924827    | PCBP4     | 3 | 51966655 | 1 | 0.038122 |
| rs893056      | WDR51A    | 3 | 52084604 | 6 | 0.06823  |
| rs893056      | WDR51A    | 3 | 52084604 | 7 | 0.038053 |
| rs352140      | TLR9      | 3 | 52231737 | 5 | 0.523694 |
| rs352140      | TLR9      | 3 | 52231737 | 1 | 1.105432 |
| rs352143      | TWF2      | 3 | 52239947 | 6 | 0.002515 |
| rs352143      | TWF2      | 3 | 52239947 | 3 | 0.679043 |

|               |        |   |          |   |          |
|---------------|--------|---|----------|---|----------|
| rs164637      | TWF2   | 3 | 52240255 | 6 | 0.976941 |
| SNP3-52365829 | DNAH1  | 3 | 52365829 | 6 | 0.455309 |
| rs11714402    | DNAH1  | 3 | 52366775 | 3 | 1.03811  |
| rs11714402    | DNAH1  | 3 | 52366775 | 6 | 1.438003 |
| rs419050      | DNAH1  | 3 | 52401924 | 6 | 1.102475 |
| rs11708581    | DNAH1  | 3 | 52404028 | 3 | 1.306033 |
| rs419752      | DNAH1  | 3 | 52404705 | 6 | 0.958409 |
| rs12163565    | DNAH1  | 3 | 52405566 | 2 | 3.495168 |
| rs12163565    | DNAH1  | 3 | 52405566 | 3 | 0.621407 |
| rs12163565    | DNAH1  | 3 | 52405566 | 5 | 0.936758 |
| rs13091025    | SEMA3G | 3 | 52442364 | 1 | 0.014062 |
| rs1541495     | NISCH  | 3 | 52467747 | 6 | 0.104772 |
| rs1010553     | STAB1  | 3 | 52515813 | 3 | 3.726261 |
| rs9853056     | STAB1  | 3 | 52530997 | 3 | 0.885537 |
| rs9853056     | STAB1  | 3 | 52530997 | 1 | 0.212558 |
| rs7639267     | NT5DC2 | 3 | 52543845 | 1 | 3.577575 |
| rs7639267     | NT5DC2 | 3 | 52543845 | 4 | 1.505673 |
| rs7639267     | NT5DC2 | 3 | 52543845 | 5 | 0.929178 |
| rs7639267     | NT5DC2 | 3 | 52543845 | 3 | 1.382197 |
| rs2251219     | PBRM1  | 3 | 52559827 | 4 | 5.025733 |
| rs2251219     | PBRM1  | 3 | 52559827 | 1 | 0.864538 |
| rs2251219     | PBRM1  | 3 | 52559827 | 5 | 1.054167 |
| rs2251219     | PBRM1  | 3 | 52559827 | 6 | 1.139796 |
| rs2251219     | PBRM1  | 3 | 52559827 | 2 | 4.797469 |
| rs17264436    | PBRM1  | 3 | 52585691 | 3 | 0.341168 |
| rs1108842     | GNL3   | 3 | 52695120 | 2 | 0.763327 |
| rs1108842     | GNL3   | 3 | 52695120 | 4 | 0.466987 |
| rs1108842     | GNL3   | 3 | 52695120 | 1 | 0.708093 |
| rs1108842     | GNL3   | 3 | 52695120 | 5 | 0.400453 |
| rs6617        | SPCS1  | 3 | 52715222 | 1 | 0.202517 |
| rs6617        | SPCS1  | 3 | 52715222 | 5 | 7.24275  |
| rs6617        | SPCS1  | 3 | 52715222 | 2 | 0.385017 |
| rs6617        | SPCS1  | 3 | 52715222 | 4 | 4.703485 |
| rs6617        | SPCS1  | 3 | 52715222 | 6 | 0.649538 |
| rs1029871     | NEK4   | 3 | 52772674 | 5 | 0.060412 |
| rs1029871     | NEK4   | 3 | 52772674 | 1 | 0.310961 |
| rs1029871     | NEK4   | 3 | 52772674 | 6 | 0.450023 |
| rs1029871     | NEK4   | 3 | 52772674 | 4 | 0.905726 |
| rs1029871     | NEK4   | 3 | 52772674 | 2 | 7.251347 |
| SNP3-52796051 | ITIH1  | 3 | 52796051 | 1 | 0.605298 |
| rs4687657     | ITIH4  | 3 | 52827578 | 4 | 0.593899 |
| rs4687657     | ITIH4  | 3 | 52827578 | 8 | 4.848384 |
| rs4687657     | ITIH4  | 3 | 52827578 | 1 | 0.622448 |
| rs4687657     | ITIH4  | 3 | 52827578 | 2 | 1.713511 |
| rs4687657     | ITIH4  | 3 | 52827578 | 5 | 0.082947 |
| rs2276816     | ITIH4  | 3 | 52835856 | 1 | 0.329256 |
| rs2276816     | ITIH4  | 3 | 52835856 | 8 | 0.12606  |



|               |          |   |          |   |          |
|---------------|----------|---|----------|---|----------|
| rs2276816     | ITIH4    | 3 | 52835856 | 2 | 0.272168 |
| rs2276817     | ITIH4    | 3 | 52835976 | 4 | 0.675829 |
| rs2276817     | ITIH4    | 3 | 52835976 | 1 | 0.288475 |
| rs2276817     | ITIH4    | 3 | 52835976 | 5 | 0.423873 |
| rs2276817     | ITIH4    | 3 | 52835976 | 2 | 1.184637 |
| rs2071042     | ITIH4    | 3 | 52839624 | 2 | 2.505161 |
| rs2071042     | ITIH4    | 3 | 52839624 | 5 | 1.244429 |
| rs2071042     | ITIH4    | 3 | 52839624 | 4 | 1.310237 |
| rs2071042     | ITIH4    | 3 | 52839624 | 1 | 1.364699 |
| rs2071041     | ITIH4    | 3 | 52839733 | 1 | 0.264973 |
| rs11626       | TMEM110  | 3 | 52849024 | 6 | 0.08332  |
| rs7645611     | RFT1     | 3 | 53100337 | 6 | 5.665905 |
| rs2230494     | PRKCD    | 3 | 53195255 | 5 | 0.217768 |
| rs312480      | CACNA1D  | 3 | 53504180 | 6 | 0.834459 |
| rs2250736     | CACNA1D  | 3 | 53675590 | 3 | 0.032357 |
| rs17053501    | CACNA1D  | 3 | 53779529 | 2 | 1.604125 |
| rs2241808     | CHDH     | 3 | 53831693 | 6 | 1.062796 |
| rs2241808     | CHDH     | 3 | 53831693 | 1 | 0.505418 |
| SNP3-53832957 | CHDH     | 3 | 53832957 | 1 | 0.524538 |
| rs709324      | IL17RB   | 3 | 53874605 | 8 | 1.68528  |
| rs709324      | IL17RB   | 3 | 53874605 | 6 | 0.319648 |
| rs709324      | IL17RB   | 3 | 53874605 | 5 | 0.075278 |
| rs709324      | IL17RB   | 3 | 53874605 | 7 | 0.362776 |
| rs709324      | IL17RB   | 3 | 53874605 | 3 | 0.510043 |
| rs3773603     | CACNA2D3 | 3 | 54855501 | 2 | 1.038514 |
| rs3773603     | CACNA2D3 | 3 | 54855501 | 1 | 0.858264 |
| rs3773603     | CACNA2D3 | 3 | 54855501 | 8 | 0.151764 |
| rs17054524    | CACNA2D3 | 3 | 54905834 | 3 | 2.352934 |
| rs17054524    | CACNA2D3 | 3 | 54905834 | 4 | 1.07215  |
| rs17054785    | CACNA2D3 | 3 | 55083189 | 2 | 1.530513 |
| rs1047898     | WNT5A    | 3 | 55474821 | 6 | 0.187329 |
| rs1047898     | WNT5A    | 3 | 55474821 | 1 | 0.821265 |
| rs1047898     | WNT5A    | 3 | 55474821 | 5 | 0.621812 |
| rs1047898     | WNT5A    | 3 | 55474821 | 4 | 4.183815 |
| rs1047898     | WNT5A    | 3 | 55474821 | 7 | 0.631649 |
| rs1047898     | WNT5A    | 3 | 55474821 | 2 | 1.835723 |
| SNP3-56305441 | ERC2     | 3 | 56305441 | 7 | 0.261337 |
| rs3732514     | C3orf63  | 3 | 56642520 | 2 | 2.81578  |
| rs9835332     | C3orf63  | 3 | 56642722 | 3 | 0.72938  |
| rs9835332     | C3orf63  | 3 | 56642722 | 2 | 3.210669 |
| rs9835332     | C3orf63  | 3 | 56642722 | 1 | 0.249919 |
| rs9835332     | C3orf63  | 3 | 56642722 | 8 | 0.46984  |
| rs6767903     | C3orf63  | 3 | 56672907 | 6 | 0.234809 |
| rs6794450     | C3orf63  | 3 | 56673306 | 6 | 0.62338  |
| rs3732511     | ARHGEF3  | 3 | 56741475 | 6 | 0.354427 |
| rs3732511     | ARHGEF3  | 3 | 56741475 | 2 | 0.64877  |
| rs1545981     | IL17RD   | 3 | 57115012 | 8 | 9.332832 |

|               |         |   |          |   |          |
|---------------|---------|---|----------|---|----------|
| rs1545981     | IL17RD  | 3 | 57115012 | 3 | 0.501342 |
| rs4299455     | IL17RD  | 3 | 57178438 | 7 | 4.387544 |
| rs4299455     | IL17RD  | 3 | 57178438 | 3 | 1.063511 |
| rs4299455     | IL17RD  | 3 | 57178438 | 1 | 1.462082 |
| rs2241988     | 2'-PDE  | 3 | 57517213 | 4 | 0.552349 |
| rs2241988     | 2'-PDE  | 3 | 57517213 | 3 | 0.426102 |
| rs2241988     | 2'-PDE  | 3 | 57517213 | 5 | 0.086948 |
| rs2241988     | 2'-PDE  | 3 | 57517213 | 2 | 3.183205 |
| rs7618684     | 2'-PDE  | 3 | 57521033 | 4 | 0.445839 |
| rs7618684     | 2'-PDE  | 3 | 57521033 | 2 | 0.393349 |
| rs7618684     | 2'-PDE  | 3 | 57521033 | 5 | 0.091469 |
| rs7618684     | 2'-PDE  | 3 | 57521033 | 8 | 2.559079 |
| rs6762914     | FAM116A | 3 | 57587663 | 8 | 0.909441 |
| rs6762914     | FAM116A | 3 | 57587663 | 3 | 1.301307 |
| rs17058639    | SLMAP   | 3 | 57857641 | 3 | 0.419498 |
| rs17058639    | SLMAP   | 3 | 57857641 | 1 | 3.102363 |
| rs2362903     | FLNB    | 3 | 58087480 | 5 | 0.599663 |
| rs2362903     | FLNB    | 3 | 58087480 | 2 | 2.16664  |
| rs2362903     | FLNB    | 3 | 58087480 | 4 | 1.459248 |
| rs2362903     | FLNB    | 3 | 58087480 | 6 | 0.661747 |
| rs13079906    | FLNB    | 3 | 58129217 | 8 | 0.280875 |
| rs13079906    | FLNB    | 3 | 58129217 | 4 | 4.947257 |
| rs1131264     | FLNB    | 3 | 58132559 | 7 | 6.989631 |
| rs1131264     | FLNB    | 3 | 58132559 | 5 | 0.277586 |
| rs1131264     | FLNB    | 3 | 58132559 | 6 | 0.816759 |
| rs1131264     | FLNB    | 3 | 58132559 | 8 | 0.566435 |
| rs11706920    | ABHD6   | 3 | 58254712 | 7 | 0.514742 |
| rs11706920    | ABHD6   | 3 | 58254712 | 2 | 3.533196 |
| rs9986        | ABHD6   | 3 | 58255446 | 1 | 5.023186 |
| rs9986        | ABHD6   | 3 | 58255446 | 8 | 4.710086 |
| rs9986        | ABHD6   | 3 | 58255446 | 3 | 0.397732 |
| SNP3-58370903 | PXK     | 3 | 58370903 | 1 | 4.058492 |
| SNP3-58370903 | PXK     | 3 | 58370903 | 7 | 0.558219 |
| SNP3-58370903 | PXK     | 3 | 58370903 | 4 | 0.802658 |
| SNP3-58370903 | PXK     | 3 | 58370903 | 6 | 6.341396 |
| SNP3-58385594 | PXK     | 3 | 58385594 | 1 | 6.141477 |
| SNP3-58385594 | PXK     | 3 | 58385594 | 7 | 0.492298 |
| SNP3-58385594 | PXK     | 3 | 58385594 | 6 | 4.754912 |
| SNP3-58385594 | PXK     | 3 | 58385594 | 4 | 0.886246 |
| rs7231        | PDHB    | 3 | 58388505 | 2 | 2.187605 |
| rs7231        | PDHB    | 3 | 58388505 | 3 | 0.041174 |
| rs7231        | PDHB    | 3 | 58388505 | 6 | 0.017247 |
| rs7614260     | FAM107A | 3 | 58526604 | 7 | 3.196118 |
| rs2306671     | FAM107A | 3 | 58538191 | 4 | 0.451687 |
| rs2306671     | FAM107A | 3 | 58538191 | 3 | 0.350388 |
| rs2306671     | FAM107A | 3 | 58538191 | 7 | 0.272018 |
| rs2306671     | FAM107A | 3 | 58538191 | 5 | 0.203622 |

|               |           |   |          |   |          |
|---------------|-----------|---|----------|---|----------|
| rs17255497    | FHIT      | 3 | 59972152 | 1 | 4.825147 |
| rs17255497    | FHIT      | 3 | 59972152 | 6 | 0.070879 |
| rs2292245     | PTPRG     | 3 | 62164229 | 1 | 4.187956 |
| rs1046025     | PSMD6     | 3 | 63971302 | 8 | 6.391796 |
| rs1046025     | PSMD6     | 3 | 63971302 | 7 | 8.81691  |
| rs1046025     | PSMD6     | 3 | 63971302 | 1 | 3.474777 |
| rs697287      | PRICKLE2  | 3 | 64186142 | 7 | 0.367683 |
| rs697287      | PRICKLE2  | 3 | 64186142 | 2 | 1.821635 |
| rs6771712     | ADAMTS9   | 3 | 64562858 | 1 | 5.011162 |
| rs6771712     | ADAMTS9   | 3 | 64562858 | 7 | 1.42378  |
| rs11708083    | MAGI1     | 3 | 65320068 | 6 | 4.44397  |
| rs13874       | SLC25A26  | 3 | 66502646 | 4 | 2.266997 |
| rs13874       | SLC25A26  | 3 | 66502646 | 7 | 0.43472  |
| rs13874       | SLC25A26  | 3 | 66502646 | 6 | 0.720899 |
| rs332373      | LRIG1     | 3 | 66513877 | 4 | 0.336027 |
| rs6549143     | FAM19A4   | 3 | 68864903 | 1 | 0.677237 |
| rs4855535     | FAM19A4   | 3 | 69017124 | 1 | 1.317953 |
| rs1532918     | TMF1      | 3 | 69165398 | 4 | 0.757447 |
| rs1532918     | TMF1      | 3 | 69165398 | 3 | 0.128944 |
| rs1532918     | TMF1      | 3 | 69165398 | 5 | 1.089545 |
| rs1532918     | TMF1      | 3 | 69165398 | 6 | 0.249279 |
| GA003445      | TMF1      | 3 | 69184059 | 7 | 1.312276 |
| rs10489       | ARL6IP5   | 3 | 69233842 | 2 | 5.222224 |
| rs4361282     | FRMD4B    | 3 | 69381923 | 3 | 0.709626 |
| rs1498845     | LOC642487 | 3 | 69667543 | 4 | 4.402659 |
| rs1498845     | LOC642487 | 3 | 69667543 | 6 | 6.461906 |
| rs6549270     | LOC654340 | 3 | 70257951 | 6 | 4.124765 |
| rs6549270     | LOC654340 | 3 | 70257951 | 1 | 4.640845 |
| rs6549270     | LOC654340 | 3 | 70257951 | 7 | 4.523854 |
| rs4594588     | NULL      | 3 | 70746879 | 3 | 1.892958 |
| rs17008544    | FOXP1     | 3 | 71491009 | 8 | 1.961163 |
| SNP3-72974237 | SHQ1      | 3 | 72974237 | 7 | 1.071245 |
| rs2291463     | PDZRN3    | 3 | 73536015 | 7 | 0.893006 |
| rs2291463     | PDZRN3    | 3 | 73536015 | 5 | 0.61712  |
| rs2291463     | PDZRN3    | 3 | 73536015 | 3 | 1.11327  |
| rs2291463     | PDZRN3    | 3 | 73536015 | 6 | 1.156867 |
| rs2291463     | PDZRN3    | 3 | 73536015 | 8 | 0.084147 |
| rs7623635     | FAM86D    | 3 | 75559476 | 3 | 1.324148 |
| SNP3-78767714 | ROBO1     | 3 | 78767714 | 4 | 5.286971 |
| rs2290081     | GBE1      | 3 | 81893415 | 5 | 0.702752 |
| rs35215849    | LOC728144 | 3 | 86145880 | 3 | 2.165138 |
| rs13074432    | VGLL3     | 3 | 87072024 | 8 | 0.201297 |
| rs13074432    | VGLL3     | 3 | 87072024 | 4 | 1.123478 |
| rs13074432    | VGLL3     | 3 | 87072024 | 3 | 0.32903  |
| rs13074432    | VGLL3     | 3 | 87072024 | 1 | 1.188177 |
| rs2279720     | CHMP2B    | 3 | 87359389 | 4 | 0.515072 |
| rs1051436     | CGGBP1    | 3 | 88184220 | 2 | 3.670441 |

|               |           |   |           |   |          |
|---------------|-----------|---|-----------|---|----------|
| rs1398197     | EPHA3     | 3 | 89581118  | 8 | 4.579704 |
| SNP3-89604383 | EPHA3     | 3 | 89604383  | 4 | 0.003424 |
| SNP3-89604383 | EPHA3     | 3 | 89604383  | 8 | 0.125806 |
| rs1054750     | EPHA3     | 3 | 89604415  | 4 | 0.93986  |
| rs17855824    | DHFRL1    | 3 | 95262550  | 1 | 5.335878 |
| rs13316505    | LOC644063 | 3 | 97552603  | 7 | 0.560951 |
| rs13316505    | LOC644063 | 3 | 97552603  | 4 | 0.630724 |
| rs13316505    | LOC644063 | 3 | 97552603  | 3 | 0.472731 |
| rs4857294     | ARL6      | 3 | 98999808  | 5 | 0.009726 |
| rs9853906     | OR5H6     | 3 | 99466632  | 3 | 1.849855 |
| rs9822460     | OR5K4     | 3 | 99556003  | 3 | 1.004157 |
| rs13068323    | OR5K3     | 3 | 99592330  | 7 | 0.884101 |
| rs13068323    | OR5K3     | 3 | 99592330  | 3 | 0.389089 |
| SNP3-99790320 | CPOX      | 3 | 99790320  | 3 | 0.224117 |
| SNP3-99790320 | CPOX      | 3 | 99790320  | 5 | 6.107597 |
| SNP3-99790320 | CPOX      | 3 | 99790320  | 4 | 7.428599 |
| SNP3-99790320 | CPOX      | 3 | 99790320  | 1 | 2.562432 |
| rs16840059    | LOC339843 | 3 | 99860047  | 7 | 3.329557 |
| rs13080329    | COL8A1    | 3 | 100946500 | 4 | 1.744588 |
| rs13080329    | COL8A1    | 3 | 100946500 | 6 | 1.210989 |
| rs793440      | FILIP1L   | 3 | 101125866 | 6 | 1.127402 |
| rs793440      | FILIP1L   | 3 | 101125866 | 7 | 1.701909 |
| rs3796131     | FILIP1L   | 3 | 101315599 | 6 | 0.577474 |
| rs3796131     | FILIP1L   | 3 | 101315599 | 4 | 0.212457 |
| rs11537816    | C3orf26   | 3 | 101369352 | 6 | 2.18915  |
| rs11537816    | C3orf26   | 3 | 101369352 | 7 | 1.228157 |
| rs17213695    | LOC391559 | 3 | 101427071 | 8 | 4.085075 |
| rs17213695    | LOC391559 | 3 | 101427071 | 5 | 4.089727 |
| rs17213695    | LOC391559 | 3 | 101427071 | 4 | 4.493928 |
| rs7641299     | LNP1      | 3 | 101653243 | 3 | 0.374322 |
| rs7641299     | LNP1      | 3 | 101653243 | 5 | 1.651097 |
| rs7641299     | LNP1      | 3 | 101653243 | 2 | 0.686253 |
| rs1144122     | GPR128    | 3 | 101837214 | 3 | 0.873233 |
| rs1144122     | GPR128    | 3 | 101837214 | 5 | 1.157826 |
| rs1144122     | GPR128    | 3 | 101837214 | 4 | 0.182715 |
| rs1048364     | ABI3BP    | 3 | 101951190 | 4 | 0.076648 |
| rs1048364     | ABI3BP    | 3 | 101951190 | 7 | 0.53165  |
| rs10936352    | ABI3BP    | 3 | 101956195 | 7 | 0.400267 |
| rs10936352    | ABI3BP    | 3 | 101956195 | 3 | 1.085717 |
| rs10936352    | ABI3BP    | 3 | 101956195 | 5 | 2.495293 |
| rs2245370     | ABI3BP    | 3 | 102100370 | 7 | 0.172237 |
| rs2245370     | ABI3BP    | 3 | 102100370 | 3 | 0.319392 |
| rs2245370     | ABI3BP    | 3 | 102100370 | 1 | 2.891508 |
| rs3732895     | ABI3BP    | 3 | 102194939 | 4 | 1.714965 |
| rs348867      | IMPG2     | 3 | 102432532 | 1 | 0.404683 |
| rs348867      | IMPG2     | 3 | 102432532 | 2 | 0.450312 |
| rs348867      | IMPG2     | 3 | 102432532 | 5 | 0.39192  |

|                |           |   |           |   |          |
|----------------|-----------|---|-----------|---|----------|
| rs348867       | IMPG2     | 3 | 102432532 | 7 | 1.125138 |
| rs348867       | IMPG2     | 3 | 102432532 | 3 | 1.926516 |
| rs571391       | IMPG2     | 3 | 102445844 | 1 | 1.051096 |
| rs571391       | IMPG2     | 3 | 102445844 | 6 | 0.362151 |
| rs571391       | IMPG2     | 3 | 102445844 | 5 | 0.389872 |
| rs571391       | IMPG2     | 3 | 102445844 | 3 | 1.259148 |
| rs571391       | IMPG2     | 3 | 102445844 | 7 | 1.33419  |
| SNP3-103023077 | FAM55C    | 3 | 103023077 | 2 | 1.425046 |
| SNP3-103023077 | FAM55C    | 3 | 103023077 | 7 | 4.091045 |
| rs6784389      | ZPLD1     | 3 | 103640107 | 1 | 3.053873 |
| rs17822848     | ZPLD1     | 3 | 103680306 | 8 | 0.132765 |
| rs17822848     | ZPLD1     | 3 | 103680306 | 1 | 0.538385 |
| rs17822848     | ZPLD1     | 3 | 103680306 | 2 | 1.130239 |
| rs17822848     | ZPLD1     | 3 | 103680306 | 6 | 2.270466 |
| rs709564       | CCDC54    | 3 | 108579237 | 2 | 1.761487 |
| rs709564       | CCDC54    | 3 | 108579237 | 6 | 1.237381 |
| rs709564       | CCDC54    | 3 | 108579237 | 5 | 0.793397 |
| rs17828926     | IFT57     | 3 | 109363163 | 1 | 5.928838 |
| rs16854512     | HHLA2     | 3 | 109563937 | 1 | 0.640459 |
| rs7635040      | MYH15     | 3 | 109582550 | 5 | 2.224912 |
| rs7635040      | MYH15     | 3 | 109582550 | 3 | 0.711886 |
| rs7635040      | MYH15     | 3 | 109582550 | 7 | 0.513127 |
| rs9873504      | MYH15     | 3 | 109618370 | 7 | 4.331721 |
| rs12638212     | MYH15     | 3 | 109642667 | 7 | 0.461344 |
| rs9868484      | MYH15     | 3 | 109671683 | 5 | 1.576431 |
| rs4299484      | MYH15     | 3 | 109672317 | 3 | 0.084351 |
| rs2278911      | KIAA1524  | 3 | 109780950 | 5 | 1.219538 |
| rs6804162      | GUCA1C    | 3 | 110122074 | 5 | 0.993361 |
| rs2715687      | GUCA1C    | 3 | 110122113 | 1 | 0.42879  |
| rs2290057      | MORC1     | 3 | 110186277 | 5 | 1.851688 |
| rs3762697      | MORC1     | 3 | 110236904 | 1 | 2.701373 |
| rs605795       | LOC440973 | 3 | 111118349 | 1 | 3.873773 |
| rs605795       | LOC440973 | 3 | 111118349 | 3 | 3.137778 |
| rs605795       | LOC440973 | 3 | 111118349 | 8 | 3.079546 |
| rs605795       | LOC440973 | 3 | 111118349 | 2 | 1.536346 |
| rs605795       | LOC440973 | 3 | 111118349 | 7 | 2.335177 |
| rs938213       | ZBED2     | 3 | 112796544 | 1 | 2.310346 |
| rs17423699     | PLCXD2    | 3 | 112915495 | 3 | 0.58286  |
| rs937557       | PLCXD2    | 3 | 113047529 | 5 | 0.019114 |
| rs3177104      | PHLDB2    | 3 | 113177814 | 1 | 5.447    |
| rs3177104      | PHLDB2    | 3 | 113177814 | 8 | 5.86808  |
| rs3177104      | PHLDB2    | 3 | 113177814 | 3 | 0.989666 |
| rs35978996     | TAGLN3    | 3 | 113201136 | 6 | 0.735198 |
| rs2292583      | TAGLN3    | 3 | 113202476 | 6 | 0.434494 |
| rs1492489      | GCET2     | 3 | 113323993 | 7 | 0.677663 |
| rs1492489      | GCET2     | 3 | 113323993 | 2 | 2.819802 |
| rs9288938      | SLC9A10   | 3 | 113403806 | 3 | 0.765168 |

|                |          |   |           |   |          |
|----------------|----------|---|-----------|---|----------|
| rs9288938      | SLC9A10  | 3 | 113403806 | 7 | 0.333761 |
| rs9288938      | SLC9A10  | 3 | 113403806 | 1 | 1.155917 |
| SNP3-113464568 | SLC9A10  | 3 | 113464568 | 4 | 0.142034 |
| SNP3-113464568 | SLC9A10  | 3 | 113464568 | 7 | 0.329243 |
| SNP3-113464568 | SLC9A10  | 3 | 113464568 | 2 | 1.967238 |
| rs9809404      | SLC9A10  | 3 | 113464614 | 2 | 3.212211 |
| rs9809404      | SLC9A10  | 3 | 113464614 | 4 | 0.77616  |
| rs9809404      | SLC9A10  | 3 | 113464614 | 7 | 1.075827 |
| rs9872691      | SLC9A10  | 3 | 113467797 | 3 | 0.364784 |
| rs9872691      | SLC9A10  | 3 | 113467797 | 7 | 0.917685 |
| rs9872691      | SLC9A10  | 3 | 113467797 | 2 | 0.441626 |
| rs9872691      | SLC9A10  | 3 | 113467797 | 1 | 0.307169 |
| rs9828502      | SLC9A10  | 3 | 113479244 | 6 | 0.54548  |
| rs9828502      | SLC9A10  | 3 | 113479244 | 1 | 0.073373 |
| rs9828502      | SLC9A10  | 3 | 113479244 | 2 | 0.72232  |
| rs9828502      | SLC9A10  | 3 | 113479244 | 3 | 0.102974 |
| rs9828502      | SLC9A10  | 3 | 113479244 | 7 | 0.350172 |
| rs2272022      | CD200    | 3 | 113546540 | 8 | 5.108945 |
| rs1050572      | CD200    | 3 | 113549252 | 5 | 0.390896 |
| rs1050572      | CD200    | 3 | 113549252 | 4 | 0.290701 |
| rs6807798      | CCDC80   | 3 | 113842616 | 8 | 4.41727  |
| rs7644174      | C3orf17  | 3 | 114205016 | 8 | 2.696321 |
| rs3814398      | BOC      | 3 | 114474002 | 2 | 0.002279 |
| rs11710894     | BOC      | 3 | 114474649 | 1 | 0.479993 |
| rs11710894     | BOC      | 3 | 114474649 | 6 | 0.299048 |
| rs11710894     | BOC      | 3 | 114474649 | 2 | 0.250906 |
| rs13094203     | BOC      | 3 | 114476057 | 1 | 3.956281 |
| rs13094203     | BOC      | 3 | 114476057 | 7 | 2.348114 |
| rs13094203     | BOC      | 3 | 114476057 | 3 | 0.109742 |
| rs2306792      | WDR52    | 3 | 114564525 | 3 | 1.03719  |
| rs13059888     | WDR52    | 3 | 114610741 | 8 | 1.714759 |
| rs13059888     | WDR52    | 3 | 114610741 | 7 | 0.559357 |
| rs13059888     | WDR52    | 3 | 114610741 | 4 | 0.068395 |
| rs13059888     | WDR52    | 3 | 114610741 | 3 | 0.125627 |
| rs13059888     | WDR52    | 3 | 114610741 | 2 | 3.775429 |
| rs33990195     | SIDT1    | 3 | 114803167 | 1 | 2.681806 |
| rs12493635     | KIAA2018 | 3 | 114855709 | 2 | 4.393335 |
| rs12493635     | KIAA2018 | 3 | 114855709 | 8 | 0.018374 |
| rs12493635     | KIAA2018 | 3 | 114855709 | 7 | 0.560417 |
| rs12493635     | KIAA2018 | 3 | 114855709 | 3 | 0.353889 |
| rs9866806      | KIAA2018 | 3 | 114862555 | 3 | 0.952356 |
| rs9866806      | KIAA2018 | 3 | 114862555 | 7 | 0.410239 |
| rs9866806      | KIAA2018 | 3 | 114862555 | 8 | 11.70369 |
| rs13079383     | GRAMD1C  | 3 | 115077067 | 1 | 3.663393 |
| rs13079383     | GRAMD1C  | 3 | 115077067 | 4 | 1.748134 |
| rs13079383     | GRAMD1C  | 3 | 115077067 | 5 | 1.361789 |
| rs3732787      | GRAMD1C  | 3 | 115148710 | 3 | 0.092747 |

|                |          |   |           |   |          |
|----------------|----------|---|-----------|---|----------|
| rs3732787      | GRAMD1C  | 3 | 115148710 | 1 | 0.963911 |
| rs3732787      | GRAMD1C  | 3 | 115148710 | 4 | 0.139345 |
| rs12629415     | ZDHHHC23 | 3 | 115162279 | 2 | 7.485956 |
| rs17603649     | KIAA1407 | 3 | 115220258 | 8 | 5.117859 |
| rs6438191      | ZNF80    | 3 | 115438010 | 4 | 1.107367 |
| rs3821560      | LSAMP    | 3 | 117054054 | 5 | 0.041956 |
| rs3821560      | LSAMP    | 3 | 117054054 | 3 | 0.847643 |
| rs2903250      | IGSF11   | 3 | 120131750 | 6 | 0.829758 |
| SNP3-120236232 | IGSF11   | 3 | 120236232 | 5 | 1.791936 |
| SNP3-120236232 | IGSF11   | 3 | 120236232 | 6 | 1.707061 |
| rs9289122      | C3orf30  | 3 | 120349737 | 5 | 0.486077 |
| rs17281535     | UPK1B    | 3 | 120375161 | 5 | 1.883119 |
| rs3764779      | B4GALT4  | 3 | 120428486 | 8 | 1.327739 |
| rs3764779      | B4GALT4  | 3 | 120428486 | 5 | 0.143963 |
| rs3764779      | B4GALT4  | 3 | 120428486 | 6 | 6.918481 |
| rs1132202      | TMEM39A  | 3 | 120633181 | 1 | 5.205394 |
| rs1132202      | TMEM39A  | 3 | 120633181 | 3 | 0.697701 |
| rs1132202      | TMEM39A  | 3 | 120633181 | 4 | 0.438915 |
| rs2282173      | TMEM39A  | 3 | 120665132 | 3 | 0.80621  |
| rs2282173      | TMEM39A  | 3 | 120665132 | 1 | 3.915234 |
| rs2282173      | TMEM39A  | 3 | 120665132 | 4 | 9.426763 |
| rs3732420      | KTELC1   | 3 | 120678856 | 1 | 2.576683 |
| rs1938         | KTELC1   | 3 | 120694557 | 7 | 0.366697 |
| rs17281703     | CD80     | 3 | 120726239 | 4 | 0.440515 |
| rs17281703     | CD80     | 3 | 120726239 | 1 | 3.611456 |
| rs17281703     | CD80     | 3 | 120726239 | 3 | 0.537819 |
| rs1599795      | CD80     | 3 | 120726545 | 5 | 0.576612 |
| rs20568        | ADPRH    | 3 | 120783829 | 2 | 6.522624 |
| rs20568        | ADPRH    | 3 | 120783829 | 3 | 1.193668 |
| rs25676        | ADPRH    | 3 | 120788069 | 2 | 3.247984 |
| rs25676        | ADPRH    | 3 | 120788069 | 5 | 4.605134 |
| rs25676        | ADPRH    | 3 | 120788069 | 3 | 0.660558 |
| rs8422         | POPDC2   | 3 | 120843634 | 4 | 1.412239 |
| rs8422         | POPDC2   | 3 | 120843634 | 3 | 0.416525 |
| rs8422         | POPDC2   | 3 | 120843634 | 2 | 3.02974  |
| rs8007         | POPDC2   | 3 | 120843940 | 2 | 2.689024 |
| rs8007         | POPDC2   | 3 | 120843940 | 4 | 0.26267  |
| rs1880040      | POPDC2   | 3 | 120861562 | 4 | 0.16025  |
| rs1880040      | POPDC2   | 3 | 120861562 | 2 | 3.294311 |
| rs2873788      | POPDC2   | 3 | 120861667 | 3 | 0.714574 |
| rs4688023      | POPDC2   | 3 | 120861876 | 4 | 0.545542 |
| rs4688024      | POPDC2   | 3 | 120862042 | 3 | 0.96575  |
| rs7634701      | C3orf15  | 3 | 120904624 | 3 | 0.227539 |
| rs7612861      | C3orf15  | 3 | 120904653 | 3 | 0.125566 |
| rs7612861      | C3orf15  | 3 | 120904653 | 5 | 0.563382 |
| rs10511394     | C3orf15  | 3 | 120967291 | 4 | 0.939199 |
| rs10511394     | C3orf15  | 3 | 120967291 | 3 | 3.422613 |

|                |         |   |           |   |          |
|----------------|---------|---|-----------|---|----------|
| rs10511394     | C3orf15 | 3 | 120967291 | 5 | 0.148764 |
| rs1129708      | C3orf15 | 3 | 120968276 | 5 | 0.650673 |
| rs1129708      | C3orf15 | 3 | 120968276 | 3 | 1.659308 |
| rs12721607     | NR1I2   | 3 | 121008893 | 3 | 1.322141 |
| rs3732359      | NR1I2   | 3 | 121019119 | 3 | 0.410027 |
| rs10511395     | NR1I2   | 3 | 121019249 | 4 | 0.792307 |
| rs10511395     | NR1I2   | 3 | 121019249 | 7 | 0.809667 |
| rs10511395     | NR1I2   | 3 | 121019249 | 5 | 0.526978 |
| rs3732360      | NR1I2   | 3 | 121019271 | 3 | 0.379553 |
| rs1054190      | NR1I2   | 3 | 121019408 | 4 | 1.083456 |
| rs1054190      | NR1I2   | 3 | 121019408 | 5 | 1.007211 |
| rs1054191      | NR1I2   | 3 | 121019587 | 4 | 2.00361  |
| rs1054191      | NR1I2   | 3 | 121019587 | 7 | 2.509533 |
| rs1054191      | NR1I2   | 3 | 121019587 | 5 | 4.21577  |
| rs3814057      | NR1I2   | 3 | 121019944 | 3 | 0.435888 |
| rs3814058      | NR1I2   | 3 | 121019981 | 3 | 0.307491 |
| rs16831036     | LRR58   | 3 | 121531293 | 2 | 5.06572  |
| rs16831036     | LRR58   | 3 | 121531293 | 4 | 0.003778 |
| SNP3-121872006 | HGD     | 3 | 121872006 | 2 | 5.582856 |
| SNP3-121872006 | HGD     | 3 | 121872006 | 4 | 0.227084 |
| SNP3-121872006 | HGD     | 3 | 121872006 | 8 | 0.045523 |
| SNP3-121872006 | HGD     | 3 | 121872006 | 3 | 0.53124  |
| SNP3-121872006 | HGD     | 3 | 121872006 | 6 | 0.432132 |
| rs6782025      | STXB5L  | 3 | 122620666 | 1 | 1.796961 |
| rs6782033      | STXB5L  | 3 | 122620705 | 1 | 1.441088 |
| rs1381057      | POLQ    | 3 | 122637664 | 1 | 2.684773 |
| rs41540016     | POLQ    | 3 | 122637812 | 4 | 5.260977 |
| SNP3-122823226 | FBXO40  | 3 | 122823226 | 5 | 0.690536 |
| rs1128163      | HCLS1   | 3 | 122833263 | 7 | 0.080032 |
| rs1128163      | HCLS1   | 3 | 122833263 | 3 | 1.391895 |
| rs1128163      | HCLS1   | 3 | 122833263 | 4 | 1.036512 |
| rs1128158      | HCLS1   | 3 | 122833283 | 6 | 0.704035 |
| rs1128158      | HCLS1   | 3 | 122833283 | 4 | 0.745116 |
| rs1128158      | HCLS1   | 3 | 122833283 | 3 | 1.510743 |
| rs1128154      | HCLS1   | 3 | 122833306 | 3 | 1.967654 |
| rs1128154      | HCLS1   | 3 | 122833306 | 4 | 0.548628 |
| rs1128154      | HCLS1   | 3 | 122833306 | 6 | 1.103525 |
| rs2070180      | HCLS1   | 3 | 122834028 | 5 | 0.671911 |
| rs2070180      | HCLS1   | 3 | 122834028 | 7 | 1.454512 |
| rs3772126      | HCLS1   | 3 | 122837273 | 3 | 0.089443 |
| rs3772126      | HCLS1   | 3 | 122837273 | 4 | 0.020952 |
| rs3732407      | GOLGB1  | 3 | 122899313 | 4 | 0.071834 |
| rs3732407      | GOLGB1  | 3 | 122899313 | 3 | 0.26028  |
| rs3732407      | GOLGB1  | 3 | 122899313 | 8 | 1.595286 |
| rs2293616      | SLC15A2 | 3 | 123124383 | 3 | 0.7528   |
| rs2293616      | SLC15A2 | 3 | 123124383 | 2 | 6.724396 |
| rs2293616      | SLC15A2 | 3 | 123124383 | 5 | 0.245618 |



|                |         |   |           |   |          |
|----------------|---------|---|-----------|---|----------|
| rs2293616      | SLC15A2 | 3 | 123124383 | 4 | 6.377117 |
| rs2257212      | SLC15A2 | 3 | 123126494 | 3 | 0.259245 |
| rs2257212      | SLC15A2 | 3 | 123126494 | 4 | 0.505315 |
| rs2257212      | SLC15A2 | 3 | 123126494 | 5 | 0.741658 |
| rs1143670      | SLC15A2 | 3 | 123129331 | 2 | 3.883616 |
| rs1143670      | SLC15A2 | 3 | 123129331 | 5 | 0.56886  |
| rs1143670      | SLC15A2 | 3 | 123129331 | 3 | 1.125585 |
| rs1143670      | SLC15A2 | 3 | 123129331 | 4 | 0.176623 |
| rs1143671      | SLC15A2 | 3 | 123129976 | 3 | 0.34647  |
| rs2877561      | ILDR1   | 3 | 123194741 | 3 | 1.30964  |
| rs2877561      | ILDR1   | 3 | 123194741 | 4 | 0.172758 |
| rs2877561      | ILDR1   | 3 | 123194741 | 8 | 3.613346 |
| SNP3-123194988 | ILDR1   | 3 | 123194988 | 8 | 4.947232 |
| SNP3-123194988 | ILDR1   | 3 | 123194988 | 3 | 3.959115 |
| SNP3-123194988 | ILDR1   | 3 | 123194988 | 2 | 1.13116  |
| SNP3-123194988 | ILDR1   | 3 | 123194988 | 1 | 6.245053 |
| SNP3-123194988 | ILDR1   | 3 | 123194988 | 5 | 4.534065 |
| rs2681417      | CD86    | 3 | 123307887 | 8 | 1.311079 |
| rs1129055      | CD86    | 3 | 123321009 | 6 | 1.702587 |
| rs1129055      | CD86    | 3 | 123321009 | 8 | 1.551793 |
| rs1915087      | CD86    | 3 | 123321481 | 6 | 0.462032 |
| rs12636058     | WDR5B   | 3 | 123613441 | 8 | 2.751367 |
| rs12636058     | WDR5B   | 3 | 123613441 | 6 | 0.014824 |
| rs12636058     | WDR5B   | 3 | 123613441 | 3 | 1.29556  |
| rs12636058     | WDR5B   | 3 | 123613441 | 2 | 1.830796 |
| rs12636058     | WDR5B   | 3 | 123613441 | 1 | 1.028403 |
| rs9843165      | WDR5B   | 3 | 123613801 | 3 | 6.008901 |
| rs3828362      | WDR5B   | 3 | 123614467 | 1 | 6.014348 |
| rs3828362      | WDR5B   | 3 | 123614467 | 6 | 3.520338 |
| rs3828362      | WDR5B   | 3 | 123614467 | 8 | 3.944636 |
| rs16833133     | KPNA1   | 3 | 123627563 | 4 | 0.622784 |
| rs16833133     | KPNA1   | 3 | 123627563 | 5 | 5.583872 |
| SNP3-123742330 | PARP9   | 3 | 123742330 | 8 | 0.409193 |
| SNP3-123742330 | PARP9   | 3 | 123742330 | 4 | 0.84884  |
| SNP3-123742330 | PARP9   | 3 | 123742330 | 5 | 5.218139 |
| rs7616403      | DTX3L   | 3 | 123774043 | 1 | 4.220122 |
| rs1106346      | PARP15  | 3 | 123836727 | 5 | 1.97194  |
| rs1106346      | PARP15  | 3 | 123836727 | 1 | 3.637934 |
| rs1106346      | PARP15  | 3 | 123836727 | 3 | 1.494973 |
| rs10934615     | PARP14  | 3 | 123930893 | 7 | 0.037433 |
| rs10934615     | PARP14  | 3 | 123930893 | 8 | 2.587833 |
| rs3806643      | HSPBAP1 | 3 | 123995321 | 1 | 2.860077 |
| rs3806643      | HSPBAP1 | 3 | 123995321 | 7 | 0.137108 |
| rs891406       | DIRC2   | 3 | 123996654 | 1 | 4.856188 |
| rs2276774      | SEMA5B  | 3 | 124129518 | 3 | 1.14659  |
| rs1976716      | PDIA5   | 3 | 124347126 | 5 | 2.716078 |
| rs1976716      | PDIA5   | 3 | 124347126 | 2 | 2.772823 |

|                |        |   |           |   |          |
|----------------|--------|---|-----------|---|----------|
| rs1976716      | PDIA5  | 3 | 124347126 | 4 | 0.405825 |
| rs1137138      | SEC22A | 3 | 124473711 | 5 | 0.341467 |
| rs1137138      | SEC22A | 3 | 124473711 | 8 | 0.511471 |
| rs1137138      | SEC22A | 3 | 124473711 | 6 | 6.079685 |
| rs6438805      | MYLK   | 3 | 124815236 | 5 | 0.086098 |
| rs6438805      | MYLK   | 3 | 124815236 | 8 | 7.474191 |
| rs6438805      | MYLK   | 3 | 124815236 | 6 | 1.219194 |
| rs17298941     | MYLK   | 3 | 124858757 | 6 | 7.661545 |
| rs3732487      | MYLK   | 3 | 124902263 | 1 | 5.07295  |
| rs35156360     | MYLK   | 3 | 124934622 | 5 | 0.02065  |
| rs2700408      | MYLK   | 3 | 125078122 | 8 | 2.999426 |
| rs2272486      | KALRN  | 3 | 125470729 | 4 | 0.103551 |
| rs2272486      | KALRN  | 3 | 125470729 | 3 | 0.224917 |
| rs2289778      | KALRN  | 3 | 125527639 | 8 | 2.176018 |
| rs2289778      | KALRN  | 3 | 125527639 | 2 | 1.917139 |
| rs2289778      | KALRN  | 3 | 125527639 | 5 | 0.204728 |
| rs2276740      | KALRN  | 3 | 125531454 | 8 | 2.256913 |
| rs2289843      | KALRN  | 3 | 125678784 | 7 | 1.094464 |
| rs6765634      | KALRN  | 3 | 125720281 | 1 | 0.424729 |
| rs6765634      | KALRN  | 3 | 125720281 | 2 | 0.920089 |
| rs6765634      | KALRN  | 3 | 125720281 | 3 | 0.115752 |
| rs7613442      | KALRN  | 3 | 125720820 | 1 | 1.284014 |
| rs7613442      | KALRN  | 3 | 125720820 | 3 | 0.48379  |
| rs1708303      | KALRN  | 3 | 125834006 | 5 | 0.150807 |
| rs1708303      | KALRN  | 3 | 125834006 | 3 | 0.285139 |
| rs1708303      | KALRN  | 3 | 125834006 | 6 | 0.115809 |
| rs1660038      | KALRN  | 3 | 125834114 | 5 | 1.696278 |
| rs1660038      | KALRN  | 3 | 125834114 | 6 | 1.110584 |
| rs1660038      | KALRN  | 3 | 125834114 | 3 | 2.587642 |
| rs1660038      | KALRN  | 3 | 125834114 | 2 | 5.430222 |
| rs2289427      | KALRN  | 3 | 125901536 | 4 | 1.205272 |
| rs2289427      | KALRN  | 3 | 125901536 | 1 | 2.031853 |
| rs2289427      | KALRN  | 3 | 125901536 | 8 | 1.118667 |
| rs2289427      | KALRN  | 3 | 125901536 | 3 | 1.823074 |
| SNP3-125901569 | KALRN  | 3 | 125901569 | 4 | 2.553861 |
| SNP3-125901569 | KALRN  | 3 | 125901569 | 1 | 3.299285 |
| SNP3-125901569 | KALRN  | 3 | 125901569 | 5 | 1.421102 |
| rs4234221      | KALRN  | 3 | 125921019 | 5 | 0.549231 |
| rs4234221      | KALRN  | 3 | 125921019 | 3 | 0.497119 |
| rs332512       | KALRN  | 3 | 125921129 | 1 | 1.435048 |
| rs332512       | KALRN  | 3 | 125921129 | 3 | 0.486698 |
| rs332514       | KALRN  | 3 | 125922257 | 3 | 0.070226 |
| rs1139538      | UMPS   | 3 | 125931981 | 7 | 1.164719 |
| rs1139538      | UMPS   | 3 | 125931981 | 4 | 0.948134 |
| rs1139538      | UMPS   | 3 | 125931981 | 3 | 1.496279 |
| rs2291085      | ITGB5  | 3 | 125998004 | 3 | 0.893503 |
| rs4679392      | MUC13  | 3 | 126129284 | 4 | 1.368291 |

|                |         |   |           |   |          |
|----------------|---------|---|-----------|---|----------|
| rs4679392      | MUC13   | 3 | 126129284 | 7 | 1.027845 |
| rs4679392      | MUC13   | 3 | 126129284 | 8 | 1.62355  |
| rs1909586      | HEG1    | 3 | 126170457 | 3 | 0.875079 |
| rs1909586      | HEG1    | 3 | 126170457 | 7 | 2.284194 |
| rs1909586      | HEG1    | 3 | 126170457 | 5 | 0.018218 |
| rs1472516      | HEG1    | 3 | 126171481 | 2 | 6.28314  |
| rs1472516      | HEG1    | 3 | 126171481 | 3 | 0.148676 |
| rs1472516      | HEG1    | 3 | 126171481 | 5 | 0.115835 |
| rs10804567     | HEG1    | 3 | 126214175 | 5 | 0.093428 |
| rs10804567     | HEG1    | 3 | 126214175 | 3 | 0.604971 |
| rs10804567     | HEG1    | 3 | 126214175 | 7 | 0.64007  |
| SNP3-126220797 | HEG1    | 3 | 126220797 | 7 | 0.24692  |
| SNP3-126220797 | HEG1    | 3 | 126220797 | 2 | 2.116613 |
| SNP3-126220797 | HEG1    | 3 | 126220797 | 5 | 1.166598 |
| SNP3-126220797 | HEG1    | 3 | 126220797 | 3 | 0.781817 |
| rs2981482      | SLC12A8 | 3 | 126285578 | 1 | 3.485695 |
| rs2981482      | SLC12A8 | 3 | 126285578 | 7 | 0.603627 |
| rs2333223      | SNX4    | 3 | 126648725 | 1 | 5.333752 |
| rs6438964      | SLC41A3 | 3 | 127258118 | 1 | 2.318719 |
| rs6438964      | SLC41A3 | 3 | 127258118 | 3 | 2.495367 |
| rs6438964      | SLC41A3 | 3 | 127258118 | 2 | 1.955475 |
| rs1055451      | CCDC37  | 3 | 127638015 | 1 | 3.420204 |
| rs15058        | ZXDC    | 3 | 127639266 | 1 | 4.868037 |
| rs7131         | ZXDC    | 3 | 127639350 | 5 | 12.36772 |
| rs7131         | ZXDC    | 3 | 127639350 | 4 | 6.099351 |
| rs7131         | ZXDC    | 3 | 127639350 | 6 | 8.017673 |
| rs7131         | ZXDC    | 3 | 127639350 | 7 | 0.462375 |
| rs7131         | ZXDC    | 3 | 127639350 | 2 | 1.583489 |
| rs1799398      | UROC1   | 3 | 127683093 | 6 | 1.376993 |
| rs1799398      | UROC1   | 3 | 127683093 | 3 | 0.030378 |
| rs1687477      | UROC1   | 3 | 127684947 | 4 | 1.619234 |
| rs1687477      | UROC1   | 3 | 127684947 | 6 | 2.008757 |
| rs1056524      | CHST13  | 3 | 127743892 | 6 | 2.248678 |
| rs1056524      | CHST13  | 3 | 127743892 | 3 | 1.180774 |
| rs1056522      | CHST13  | 3 | 127744035 | 7 | 0.090056 |
| rs869463       | C3orf22 | 3 | 127751608 | 7 | 0.048557 |
| rs2272487      | CHCHD6  | 3 | 127934627 | 1 | 0.567134 |
| rs41266467     | PLXNA1  | 3 | 128204994 | 7 | 0.219415 |
| rs9856665      | PLXNA1  | 3 | 128237334 | 7 | 2.190949 |
| rs9856665      | PLXNA1  | 3 | 128237334 | 3 | 0.517695 |
| rs9856665      | PLXNA1  | 3 | 128237334 | 5 | 0.739528 |
| rs9856665      | PLXNA1  | 3 | 128237334 | 6 | 0.486973 |
| rs9856665      | PLXNA1  | 3 | 128237334 | 1 | 5.086613 |
| rs920232       | PODXL2  | 3 | 128861960 | 1 | 4.698565 |
| rs920232       | PODXL2  | 3 | 128861960 | 7 | 0.075033 |
| rs782444       | MGLL    | 3 | 128892631 | 1 | 3.054316 |
| rs782444       | MGLL    | 3 | 128892631 | 3 | 1.258193 |

|                |           |   |           |   |          |
|----------------|-----------|---|-----------|---|----------|
| rs782444       | MGLL      | 3 | 128892631 | 6 | 0.539691 |
| rs782444       | MGLL      | 3 | 128892631 | 8 | 0.051    |
| rs814131       | MGLL      | 3 | 128893605 | 3 | 0.613613 |
| rs814131       | MGLL      | 3 | 128893605 | 1 | 5.212994 |
| rs814131       | MGLL      | 3 | 128893605 | 6 | 2.528509 |
| rs814131       | MGLL      | 3 | 128893605 | 8 | 0.612736 |
| rs2981026      | DNAJB8    | 3 | 129664764 | 5 | 1.156691 |
| rs13071640     | DNAJB8    | 3 | 129665068 | 3 | 0.479267 |
| rs3803         | GATA2     | 3 | 129682070 | 7 | 0.079952 |
| rs2335052      | GATA2     | 3 | 129687641 | 5 | 0.2525   |
| rs1573858      | GATA2     | 3 | 129688550 | 8 | 7.613438 |
| rs6762732      | C3orf27   | 3 | 129775548 | 3 | 0.384236 |
| rs2465354      | C3orf27   | 3 | 129777587 | 5 | 2.198688 |
| rs2465354      | C3orf27   | 3 | 129777587 | 1 | 3.178011 |
| rs4494951      | ACAD9     | 3 | 130110577 | 3 | 0.991845 |
| rs876755       | ACAD9     | 3 | 130110623 | 2 | 0.103252 |
| rs789212       | KIAA1257  | 3 | 130169602 | 1 | 0.340274 |
| rs789212       | KIAA1257  | 3 | 130169602 | 3 | 0.477138 |
| rs16859327     | C3orf25   | 3 | 130616932 | 5 | 1.487455 |
| rs3796392      | C3orf25   | 3 | 130619817 | 5 | 1.535258 |
| SNP3-130619878 | C3orf25   | 3 | 130619878 | 3 | 0.477676 |
| rs3774788      | C3orf25   | 3 | 130623179 | 6 | 1.578536 |
| rs3774788      | C3orf25   | 3 | 130623179 | 7 | 0.816142 |
| rs2307293      | MBD4      | 3 | 130633075 | 1 | 6.858188 |
| SNP3-130696992 | IFT122    | 3 | 130696992 | 6 | 7.077339 |
| SNP3-130696992 | IFT122    | 3 | 130696992 | 7 | 0.628637 |
| rs2269736      | RHO       | 3 | 130730216 | 5 | 1.16704  |
| rs2410         | RHO       | 3 | 130735483 | 5 | 0.400921 |
| SNP3-130750600 | H1FOO     | 3 | 130750600 | 7 | 2.745831 |
| rs2625973      | PLXND1    | 3 | 130767508 | 7 | 0.410479 |
| rs2625973      | PLXND1    | 3 | 130767508 | 2 | 4.031255 |
| rs2625973      | PLXND1    | 3 | 130767508 | 3 | 1.917574 |
| rs2625973      | PLXND1    | 3 | 130767508 | 8 | 4.525329 |
| rs2245285      | PLXND1    | 3 | 130769103 | 8 | 0.515475 |
| rs2245285      | PLXND1    | 3 | 130769103 | 7 | 7.463748 |
| rs2245285      | PLXND1    | 3 | 130769103 | 3 | 1.220674 |
| rs7428344      | LOC729375 | 3 | 131308790 | 5 | 1.715127 |
| rs7428344      | LOC729375 | 3 | 131308790 | 1 | 0.197118 |
| rs7428344      | LOC729375 | 3 | 131308790 | 6 | 0.778373 |
| rs9849611      | LOC646300 | 3 | 131467888 | 3 | 1.412637 |
| rs7614116      | COL6A6    | 3 | 131850759 | 3 | 1.170743 |
| rs7636656      | COL6A6    | 3 | 131850991 | 5 | 0.007212 |
| rs17748751     | COL6A6    | 3 | 131877418 | 3 | 0.480167 |
| rs17748751     | COL6A6    | 3 | 131877418 | 5 | 2.672227 |
| rs7639697      | NEK11     | 3 | 132376534 | 6 | 0.591494 |
| rs12639101     | NEK11     | 3 | 132376608 | 8 | 1.355726 |
| rs3738000      | NEK11     | 3 | 132430125 | 8 | 9.260855 |

|                |         |   |           |   |          |
|----------------|---------|---|-----------|---|----------|
| rs3738000      | NEK11   | 3 | 132430125 | 4 | 6.092106 |
| rs3738000      | NEK11   | 3 | 132430125 | 6 | 0.117512 |
| rs3738000      | NEK11   | 3 | 132430125 | 5 | 8.292993 |
| rs7648888      | CPNE4   | 3 | 133236213 | 3 | 1.437512 |
| rs7648888      | CPNE4   | 3 | 133236213 | 8 | 1.429787 |
| rs7648888      | CPNE4   | 3 | 133236213 | 4 | 1.296425 |
| rs7648888      | CPNE4   | 3 | 133236213 | 7 | 6.607289 |
| SNP3-133558397 | ACPP    | 3 | 133558397 | 2 | 0.177758 |
| SNP3-133558397 | ACPP    | 3 | 133558397 | 7 | 0.303325 |
| SNP3-133558397 | ACPP    | 3 | 133558397 | 3 | 0.053478 |
| SNP3-133558397 | ACPP    | 3 | 133558397 | 6 | 0.425736 |
| SNP3-133558397 | ACPP    | 3 | 133558397 | 4 | 5.83959  |
| SNP3-133558397 | ACPP    | 3 | 133558397 | 5 | 4.157699 |
| SNP3-133558397 | ACPP    | 3 | 133558397 | 1 | 0.941468 |
| rs1042330      | ACPP    | 3 | 133558436 | 3 | 1.045386 |
| rs1042330      | ACPP    | 3 | 133558436 | 7 | 1.353048 |
| rs1042330      | ACPP    | 3 | 133558436 | 4 | 4.17809  |
| rs1042330      | ACPP    | 3 | 133558436 | 5 | 0.081856 |
| rs1042330      | ACPP    | 3 | 133558436 | 6 | 2.919282 |
| rs1042330      | ACPP    | 3 | 133558436 | 1 | 0.254738 |
| rs1042330      | ACPP    | 3 | 133558436 | 2 | 1.81626  |
| rs2239698      | ACPP    | 3 | 133558886 | 1 | 4.130586 |
| rs2239698      | ACPP    | 3 | 133558886 | 5 | 0.939522 |
| rs14192        | ACPP    | 3 | 133559241 | 4 | 5.741893 |
| rs14192        | ACPP    | 3 | 133559241 | 5 | 3.831548 |
| rs14192        | ACPP    | 3 | 133559241 | 3 | 6.575396 |
| rs14192        | ACPP    | 3 | 133559241 | 1 | 0.130649 |
| rs14192        | ACPP    | 3 | 133559241 | 2 | 2.257046 |
| rs14192        | ACPP    | 3 | 133559241 | 6 | 4.436622 |
| rs9877018      | ACAD11  | 3 | 133844286 | 1 | 4.482996 |
| rs11708200     | NPHP3   | 3 | 133883178 | 2 | 3.890001 |
| rs1197314      | TMEM108 | 3 | 134581935 | 7 | 2.523595 |
| rs6792846      | CDV3    | 3 | 134790181 | 7 | 0.772674 |
| rs17301766     | TOPBP1  | 3 | 134839480 | 2 | 3.823311 |
| rs17301766     | TOPBP1  | 3 | 134839480 | 4 | 0.057575 |
| rs3192149      | TOPBP1  | 3 | 134851052 | 4 | 1.272634 |
| rs8649         | TF      | 3 | 134969648 | 1 | 0.332504 |
| rs1107413      | SRPRB   | 3 | 135007407 | 1 | 0.741568 |
| rs1107413      | SRPRB   | 3 | 135007407 | 2 | 0.352863 |
| rs1107413      | SRPRB   | 3 | 135007407 | 6 | 1.023207 |
| rs1107413      | SRPRB   | 3 | 135007407 | 3 | 0.071019 |
| rs3811659      | RAB6B   | 3 | 135026698 | 4 | 0.096891 |
| rs1043147      | RAB6B   | 3 | 135027688 | 4 | 0.09811  |
| rs12637730     | RAB6B   | 3 | 135028987 | 4 | 2.95298  |
| rs2293374      | RAB6B   | 3 | 135029935 | 4 | 3.718595 |
| rs2293373      | RAB6B   | 3 | 135030382 | 4 | 1.341312 |
| SNP3-135148899 | SLCO2A1 | 3 | 135148899 | 3 | 0.821018 |

|                |           |   |           |   |          |
|----------------|-----------|---|-----------|---|----------|
| SNP3-135148899 | SLCO2A1   | 3 | 135148899 | 5 | 6.163393 |
| SNP3-135148899 | SLCO2A1   | 3 | 135148899 | 2 | 4.550717 |
| rs1874883      | CEP63     | 3 | 135687761 | 4 | 1.013794 |
| rs1874883      | CEP63     | 3 | 135687761 | 3 | 0.368575 |
| rs1874883      | CEP63     | 3 | 135687761 | 7 | 0.387745 |
| rs1874883      | CEP63     | 3 | 135687761 | 5 | 1.183126 |
| rs1874883      | CEP63     | 3 | 135687761 | 8 | 0.568893 |
| rs9868985      | CEP63     | 3 | 135760960 | 6 | 2.886519 |
| rs9868985      | CEP63     | 3 | 135760960 | 4 | 0.470767 |
| rs13071253     | LOC729534 | 3 | 135799343 | 2 | 2.418727 |
| rs13071253     | LOC729534 | 3 | 135799343 | 3 | 0.277113 |
| rs13071253     | LOC729534 | 3 | 135799343 | 4 | 0.853772 |
| rs13071253     | LOC729534 | 3 | 135799343 | 5 | 0.702047 |
| rs9857995      | LOC729534 | 3 | 135799396 | 8 | 1.2831   |
| rs9857995      | LOC729534 | 3 | 135799396 | 4 | 1.064971 |
| rs9857995      | LOC729534 | 3 | 135799396 | 3 | 1.056858 |
| rs9857995      | LOC729534 | 3 | 135799396 | 5 | 0.49707  |
| rs9857995      | LOC729534 | 3 | 135799396 | 7 | 0.163565 |
| rs13078595     | LOC645218 | 3 | 136055947 | 1 | 0.72498  |
| rs7644369      | EPHB1     | 3 | 136153214 | 4 | 0.273012 |
| rs7644369      | EPHB1     | 3 | 136153214 | 7 | 0.232253 |
| rs7644369      | EPHB1     | 3 | 136153214 | 1 | 2.665487 |
| rs3732566      | EPHB1     | 3 | 136381432 | 6 | 0.458016 |
| rs3732566      | EPHB1     | 3 | 136381432 | 3 | 1.164839 |
| rs3732566      | EPHB1     | 3 | 136381432 | 7 | 0.593972 |
| rs3732566      | EPHB1     | 3 | 136381432 | 4 | 4.255322 |
| rs3732566      | EPHB1     | 3 | 136381432 | 8 | 5.684199 |
| rs10608        | EPHB1     | 3 | 136461859 | 1 | 4.31304  |
| rs10608        | EPHB1     | 3 | 136461859 | 8 | 0.851911 |
| SNP3-137203230 | PPP2R3A   | 3 | 137203230 | 3 | 0.281315 |
| SNP3-137203230 | PPP2R3A   | 3 | 137203230 | 8 | 6.029248 |
| SNP3-137203230 | PPP2R3A   | 3 | 137203230 | 1 | 3.354301 |
| rs9845457      | MSL2L1    | 3 | 137397166 | 1 | 2.15971  |
| rs9845457      | MSL2L1    | 3 | 137397166 | 3 | 0.130188 |
| rs9845457      | MSL2L1    | 3 | 137397166 | 8 | 3.555196 |
| rs9845457      | MSL2L1    | 3 | 137397166 | 7 | 1.133144 |
| rs9845457      | MSL2L1    | 3 | 137397166 | 5 | 1.178273 |
| rs1052620      | TMEM22    | 3 | 138057211 | 1 | 4.180259 |
| rs1052620      | TMEM22    | 3 | 138057211 | 5 | 0.127316 |
| rs2589258      | CLDN18    | 3 | 139234694 | 5 | 2.278781 |
| rs2589258      | CLDN18    | 3 | 139234694 | 7 | 0.109778 |
| rs2589258      | CLDN18    | 3 | 139234694 | 6 | 0.262714 |
| rs2589258      | CLDN18    | 3 | 139234694 | 1 | 5.515016 |
| rs442800       | DZIP1L    | 3 | 139269132 | 5 | 2.528079 |
| rs442800       | DZIP1L    | 3 | 139269132 | 2 | 6.653021 |
| rs442800       | DZIP1L    | 3 | 139269132 | 1 | 0.455258 |
| rs2246945      | A4GNT     | 3 | 139326166 | 1 | 0.775119 |

|                |           |   |           |   |          |
|----------------|-----------|---|-----------|---|----------|
| rs2622737      | DBR1      | 3 | 139362683 | 5 | 0.067209 |
| rs2622737      | DBR1      | 3 | 139362683 | 7 | 0.365021 |
| rs2622737      | DBR1      | 3 | 139362683 | 1 | 5.472747 |
| rs2622737      | DBR1      | 3 | 139362683 | 6 | 0.895366 |
| rs2622737      | DBR1      | 3 | 139362683 | 4 | 0.019874 |
| rs2622737      | DBR1      | 3 | 139362683 | 8 | 0.115403 |
| SNP3-139603888 | MRAS      | 3 | 139603888 | 4 | 8.595117 |
| rs9818870      | MRAS      | 3 | 139604812 | 4 | 0.539591 |
| SNP3-139605167 | MRAS      | 3 | 139605167 | 4 | 5.576783 |
| SNP3-139669706 | FAM62C    | 3 | 139669706 | 8 | 0.654385 |
| rs2347469      | FAM62C    | 3 | 139671721 | 8 | 0.413745 |
| rs3813264      | FAM62C    | 3 | 139672348 | 8 | 0.665349 |
| rs1673608      | CEP70     | 3 | 139771853 | 1 | 4.395253 |
| rs1673608      | CEP70     | 3 | 139771853 | 4 | 2.621768 |
| rs811322       | FAIM      | 3 | 139812552 | 4 | 1.015067 |
| rs811322       | FAIM      | 3 | 139812552 | 8 | 1.384706 |
| rs811322       | FAIM      | 3 | 139812552 | 1 | 4.101301 |
| rs641320       | FAIM      | 3 | 139830647 | 5 | 0.689241 |
| rs9816111      | NMNAT3    | 3 | 140879516 | 1 | 0.77194  |
| rs9816111      | NMNAT3    | 3 | 140879516 | 3 | 1.432566 |
| rs10804675     | CLSTN2    | 3 | 141765551 | 3 | 0.732457 |
| rs13078522     | CLSTN2    | 3 | 141768194 | 8 | 5.506344 |
| rs9876490      | TRIM42    | 3 | 141889950 | 1 | 2.869667 |
| rs3210458      | ACPL2     | 3 | 142494320 | 1 | 5.334893 |
| rs2312500      | LOC646730 | 3 | 142868380 | 3 | 1.990452 |
| rs2312500      | LOC646730 | 3 | 142868380 | 2 | 3.162678 |
| rs6767392      | LOC646730 | 3 | 142887521 | 1 | 0.543162 |
| rs3184648      | RNF7      | 3 | 142946836 | 3 | 0.81644  |
| rs3184648      | RNF7      | 3 | 142946836 | 1 | 1.944544 |
| rs1533501      | GRK7      | 3 | 142979840 | 7 | 0.43656  |
| rs36009541     | GRK7      | 3 | 143018248 | 7 | 1.638726 |
| SNP3-143018298 | GRK7      | 3 | 143018298 | 7 | 1.14436  |
| SNP3-143018298 | GRK7      | 3 | 143018298 | 4 | 1.082567 |
| rs2227930      | ATR       | 3 | 143760265 | 6 | 4.121823 |
| rs2227930      | ATR       | 3 | 143760265 | 7 | 0.007434 |
| rs2227930      | ATR       | 3 | 143760265 | 1 | 0.156402 |
| rs2227930      | ATR       | 3 | 143760265 | 2 | 4.200504 |
| rs2227930      | ATR       | 3 | 143760265 | 4 | 7.201476 |
| rs6763202      | SLC9A9    | 3 | 144775702 | 1 | 3.178042 |
| rs6763202      | SLC9A9    | 3 | 144775702 | 4 | 0.342067 |
| rs1242069      | SLC9A9    | 3 | 144853891 | 7 | 0.366695 |
| rs13092702     | LOC440981 | 3 | 147601985 | 3 | 0.966389 |
| rs13092702     | LOC440981 | 3 | 147601985 | 1 | 0.581424 |
| rs13092702     | LOC440981 | 3 | 147601985 | 6 | 0.255459 |
| rs13092702     | LOC440981 | 3 | 147601985 | 2 | 0.404144 |
| rs13092702     | LOC440981 | 3 | 147601985 | 5 | 0.103726 |
| rs1054736      | PLSCR2    | 3 | 147633865 | 3 | 1.337171 |

|                |           |   |           |   |          |
|----------------|-----------|---|-----------|---|----------|
| rs1054736      | PLSCR2    | 3 | 147633865 | 5 | 0.487345 |
| rs1054736      | PLSCR2    | 3 | 147633865 | 1 | 0.290374 |
| rs9289748      | FLJ30375  | 3 | 148620666 | 8 | 5.443912 |
| rs1059502      | CPB1      | 3 | 150045000 | 7 | 2.095426 |
| rs1059502      | CPB1      | 3 | 150045000 | 1 | 1.002651 |
| rs1059502      | CPB1      | 3 | 150045000 | 2 | 0.884869 |
| rs2229361      | HLTF      | 3 | 150240554 | 5 | 0.273909 |
| rs1802837      | TM4SF4    | 3 | 150676374 | 5 | 0.267495 |
| rs1802837      | TM4SF4    | 3 | 150676374 | 6 | 2.491001 |
| rs12636725     | TM4SF4    | 3 | 150703207 | 1 | 1.118672 |
| rs11557682     | RNF13     | 3 | 151013315 | 7 | 3.280043 |
| rs11557682     | RNF13     | 3 | 151013315 | 5 | 0.441899 |
| rs11557682     | RNF13     | 3 | 151013315 | 8 | 0.214059 |
| rs11557682     | RNF13     | 3 | 151013315 | 3 | 0.551673 |
| rs11557682     | RNF13     | 3 | 151013315 | 6 | 4.456578 |
| rs879634       | TSC22D2   | 3 | 151611082 | 5 | 0.488556 |
| rs879634       | TSC22D2   | 3 | 151611082 | 8 | 3.867076 |
| rs2626         | EIF2A     | 3 | 151786357 | 4 | 0.421297 |
| rs2626         | EIF2A     | 3 | 151786357 | 2 | 6.612481 |
| rs2626         | EIF2A     | 3 | 151786357 | 5 | 2.450546 |
| SNP3-151874500 | C3orf44   | 3 | 151874500 | 3 | 0.699961 |
| rs17281287     | C3orf44   | 3 | 151904109 | 8 | 0.956095 |
| rs17281287     | C3orf44   | 3 | 151904109 | 1 | 1.319686 |
| rs17281287     | C3orf44   | 3 | 151904109 | 5 | 0.216377 |
| rs2168445      | LOC646951 | 3 | 152105550 | 3 | 0.353619 |
| rs11914988     | CLRN1     | 3 | 152144532 | 3 | 0.285144 |
| rs3796242      | CLRN1     | 3 | 152173129 | 1 | 0.485758 |
| rs17290219     | MED12L    | 3 | 152364464 | 6 | 0.865828 |
| rs1220995      | P2RY14    | 3 | 152413762 | 3 | 0.438044 |
| rs1220995      | P2RY14    | 3 | 152413762 | 5 | 1.123023 |
| rs1472122      | GPR87     | 3 | 152517292 | 8 | 4.355036 |
| rs1472122      | GPR87     | 3 | 152517292 | 3 | 1.180226 |
| rs1472122      | GPR87     | 3 | 152517292 | 1 | 4.319412 |
| rs1472122      | GPR87     | 3 | 152517292 | 7 | 1.220186 |
| rs6440735      | P2RY13    | 3 | 152527422 | 1 | 4.955774 |
| rs12497019     | P2RY13    | 3 | 152527593 | 5 | 2.296044 |
| rs12497019     | P2RY13    | 3 | 152527593 | 3 | 0.299552 |
| rs12497019     | P2RY13    | 3 | 152527593 | 4 | 1.578628 |
| rs1388628      | P2RY13    | 3 | 152527936 | 3 | 0.434384 |
| rs1388627      | P2RY13    | 3 | 152527985 | 3 | 0.162054 |
| rs1491980      | P2RY13    | 3 | 152528351 | 1 | 1.90286  |
| rs1466684      | P2RY13    | 3 | 152528998 | 1 | 1.302334 |
| rs3732765      | MED12L    | 3 | 152573114 | 4 | 0.230884 |
| rs3732765      | MED12L    | 3 | 152573114 | 3 | 0.778757 |
| rs3732768      | MED12L    | 3 | 152595258 | 3 | 1.39222  |
| rs3732768      | MED12L    | 3 | 152595258 | 8 | 0.18274  |
| rs3732768      | MED12L    | 3 | 152595258 | 5 | 3.154376 |



|                |             |   |           |   |          |
|----------------|-------------|---|-----------|---|----------|
| rs3732768      | MED12L      | 3 | 152595258 | 2 | 1.875245 |
| rs3732768      | MED12L      | 3 | 152595258 | 7 | 0.884727 |
| rs7611956      | MED12L      | 3 | 152633910 | 4 | 0.721949 |
| rs7611956      | MED12L      | 3 | 152633910 | 2 | 3.781103 |
| rs2172250      | IGSF10      | 3 | 152637356 | 4 | 0.031211 |
| rs2172250      | IGSF10      | 3 | 152637356 | 7 | 0.635651 |
| rs6781302      | IGSF10      | 3 | 152638310 | 7 | 4.38898  |
| rs6781302      | IGSF10      | 3 | 152638310 | 1 | 0.833606 |
| rs6781302      | IGSF10      | 3 | 152638310 | 4 | 1.216611 |
| rs6798252      | IGSF10      | 3 | 152649112 | 7 | 0.914376 |
| rs7619322      | IGSF10      | 3 | 152654129 | 7 | 1.328842 |
| rs7621591      | IGSF10      | 3 | 152654232 | 7 | 0.930654 |
| rs842049       | hCG_1806964 | 3 | 153466638 | 1 | 3.994732 |
| rs842049       | hCG_1806964 | 3 | 153466638 | 7 | 0.84698  |
| rs842049       | hCG_1806964 | 3 | 153466638 | 4 | 0.80292  |
| rs6785014      | RAP2B       | 3 | 154368289 | 2 | 3.432118 |
| rs6785014      | RAP2B       | 3 | 154368289 | 8 | 0.157253 |
| rs6785014      | RAP2B       | 3 | 154368289 | 7 | 0.301179 |
| SNP3-155322649 | SGEF        | 3 | 155322649 | 7 | 0.401297 |
| SNP3-155322649 | SGEF        | 3 | 155322649 | 2 | 3.174754 |
| SNP3-155323079 | SGEF        | 3 | 155323079 | 7 | 4.022223 |
| SNP3-155426460 | SGEF        | 3 | 155426460 | 1 | 3.409623 |
| rs191651       | SGEF        | 3 | 155456581 | 7 | 1.178876 |
| rs191651       | SGEF        | 3 | 155456581 | 2 | 6.620175 |
| rs9438         | DHX36       | 3 | 155501581 | 8 | 0.718078 |
| rs9438         | DHX36       | 3 | 155501581 | 3 | 0.568567 |
| rs9438         | DHX36       | 3 | 155501581 | 2 | 5.019779 |
| rs9438         | DHX36       | 3 | 155501581 | 4 | 0.110007 |
| rs9438         | DHX36       | 3 | 155501581 | 7 | 0.306782 |
| rs7610758      | MME         | 3 | 156382538 | 7 | 0.972957 |
| rs1816522      | PLCH1       | 3 | 156683257 | 2 | 3.868193 |
| rs359569       | PLCH1       | 3 | 156796728 | 5 | 0.045391 |
| rs359569       | PLCH1       | 3 | 156796728 | 3 | 0.571379 |
| rs6806798      | C3orf33     | 3 | 156963791 | 1 | 0.208852 |
| rs7653384      | C3orf33     | 3 | 156964303 | 1 | 0.49309  |
| rs7653384      | C3orf33     | 3 | 156964303 | 8 | 0.083741 |
| rs7653384      | C3orf33     | 3 | 156964303 | 6 | 0.065074 |
| rs358733       | C3orf33     | 3 | 156967996 | 1 | 1.046695 |
| rs6781558      | VN2R1P      | 3 | 157234178 | 8 | 1.268832 |
| rs907060       | KCNAB1      | 3 | 157737781 | 2 | 0.816615 |
| rs907060       | KCNAB1      | 3 | 157737781 | 1 | 0.000521 |
| rs3773714      | SSR3        | 3 | 157742660 | 1 | 5.10094  |
| rs3773714      | SSR3        | 3 | 157742660 | 5 | 0.021561 |
| rs3773714      | SSR3        | 3 | 157742660 | 7 | 0.182886 |
| rs6441095      | LOC653801   | 3 | 157874885 | 2 | 1.552553 |
| rs344053       | TIPARP      | 3 | 157906505 | 2 | 4.015859 |
| rs10936063     | KRT18P34    | 3 | 158363577 | 3 | 0.259448 |

|                |           |   |           |   |          |
|----------------|-----------|---|-----------|---|----------|
| rs10936063     | KRT18P34  | 3 | 158363577 | 7 | 1.069758 |
| rs10936063     | KRT18P34  | 3 | 158363577 | 5 | 0.405022 |
| rs10936065     | KRT18P34  | 3 | 158363639 | 5 | 1.240568 |
| rs10936065     | KRT18P34  | 3 | 158363639 | 3 | 1.320794 |
| rs10936065     | KRT18P34  | 3 | 158363639 | 7 | 0.880813 |
| rs11918974     | VEPH1     | 3 | 158564018 | 5 | 0.303796 |
| rs11918974     | VEPH1     | 3 | 158564018 | 3 | 0.30286  |
| rs11918974     | VEPH1     | 3 | 158564018 | 6 | 0.176088 |
| rs1048243      | SHOX2     | 3 | 159298155 | 4 | 0.470969 |
| rs1048243      | SHOX2     | 3 | 159298155 | 1 | 0.514625 |
| rs1048243      | SHOX2     | 3 | 159298155 | 7 | 1.558078 |
| rs8455         | LXN       | 3 | 159871474 | 4 | 0.992362 |
| rs8455         | LXN       | 3 | 159871474 | 1 | 0.584009 |
| rs8455         | LXN       | 3 | 159871474 | 3 | 0.46045  |
| rs568408       | IL12A     | 3 | 161196161 | 7 | 4.429117 |
| rs11921898     | BRD7P2    | 3 | 161302261 | 5 | 1.192278 |
| rs11921898     | BRD7P2    | 3 | 161302261 | 7 | 2.523215 |
| rs34182424     | IFT80     | 3 | 161566612 | 4 | 0.641924 |
| rs34182424     | IFT80     | 3 | 161566612 | 6 | 7.792002 |
| rs7629         | TRIM59    | 3 | 161635999 | 1 | 0.110805 |
| rs7629         | TRIM59    | 3 | 161635999 | 3 | 0.912636 |
| rs4679885      | TRIM59    | 3 | 161637441 | 2 | 0.244607 |
| rs4679885      | TRIM59    | 3 | 161637441 | 5 | 2.824259 |
| rs4679885      | TRIM59    | 3 | 161637441 | 4 | 0.671213 |
| rs4679885      | TRIM59    | 3 | 161637441 | 1 | 1.48655  |
| rs4679885      | TRIM59    | 3 | 161637441 | 3 | 1.597838 |
| rs2279457      | LOC401098 | 3 | 161650986 | 3 | 0.250396 |
| rs2279457      | LOC401098 | 3 | 161650986 | 4 | 0.594707 |
| rs2279457      | LOC401098 | 3 | 161650986 | 2 | 0.544617 |
| rs2279457      | LOC401098 | 3 | 161650986 | 1 | 0.528265 |
| rs1993891      | LOC646085 | 3 | 162530161 | 6 | 0.713217 |
| rs4856703      | LOC646085 | 3 | 162530414 | 5 | 1.239626 |
| rs4856703      | LOC646085 | 3 | 162530414 | 3 | 1.68123  |
| rs960212       | LOC646085 | 3 | 162530668 | 2 | 2.745541 |
| rs960212       | LOC646085 | 3 | 162530668 | 6 | 0.106782 |
| rs3921595      | LOC131149 | 3 | 162704399 | 1 | 1.722064 |
| rs11922760     | SLITRK3   | 3 | 166388264 | 5 | 0.04738  |
| rs3792293      | PDCD10    | 3 | 168935198 | 7 | 0.642641 |
| rs3792293      | PDCD10    | 3 | 168935198 | 6 | 0.080801 |
| rs3792293      | PDCD10    | 3 | 168935198 | 4 | 1.321783 |
| rs2229697      | SERPINI1  | 3 | 168993166 | 7 | 0.431847 |
| SNP3-169229716 | GOLIM4    | 3 | 169229716 | 5 | 1.385735 |
| SNP3-169229716 | GOLIM4    | 3 | 169229716 | 4 | 1.082387 |
| SNP3-169229716 | GOLIM4    | 3 | 169229716 | 6 | 0.621826 |
| rs17466625     | EVI1      | 3 | 170293568 | 2 | 2.362263 |
| rs17466625     | EVI1      | 3 | 170293568 | 5 | 0.196936 |
| rs10936600     | LRRC34    | 3 | 170997279 | 7 | 3.254148 |

|            |           |   |           |   |          |
|------------|-----------|---|-----------|---|----------|
| rs10936600 | LRR34     | 3 | 170997279 | 2 | 5.69462  |
| rs10936600 | LRR34     | 3 | 170997279 | 5 | 0.98419  |
| rs3772172  | SKIL      | 3 | 171560407 | 7 | 1.002925 |
| rs3772172  | SKIL      | 3 | 171560407 | 4 | 0.576194 |
| rs4955729  | FLJ37228  | 3 | 171662276 | 3 | 0.794069 |
| rs4955730  | FLJ37228  | 3 | 171662315 | 3 | 0.566756 |
| rs6792607  | EIF5A2    | 3 | 172093010 | 6 | 1.525743 |
| rs6792607  | EIF5A2    | 3 | 172093010 | 5 | 0.092807 |
| rs7652177  | FNDC3B    | 3 | 173451771 | 1 | 0.113245 |
| rs7652177  | FNDC3B    | 3 | 173451771 | 7 | 0.020587 |
| rs7652177  | FNDC3B    | 3 | 173451771 | 8 | 6.789853 |
| rs7652177  | FNDC3B    | 3 | 173451771 | 6 | 0.221726 |
| rs7652177  | FNDC3B    | 3 | 173451771 | 2 | 6.547205 |
| rs2270568  | FNDC3B    | 3 | 173529555 | 3 | 0.408557 |
| rs2270568  | FNDC3B    | 3 | 173529555 | 5 | 0.424342 |
| rs2270568  | FNDC3B    | 3 | 173529555 | 1 | 3.725794 |
| rs2270568  | FNDC3B    | 3 | 173529555 | 6 | 0.104645 |
| rs2270568  | FNDC3B    | 3 | 173529555 | 4 | 1.033113 |
| rs2232169  | GHSR      | 3 | 173648451 | 3 | 0.661911 |
| rs2232169  | GHSR      | 3 | 173648451 | 6 | 1.155788 |
| rs2232165  | GHSR      | 3 | 173648838 | 3 | 0.008838 |
| rs1131532  | TNFSF10   | 3 | 173706997 | 3 | 0.532567 |
| rs3733023  | AADACL1   | 3 | 173833700 | 1 | 6.143589 |
| rs3733023  | AADACL1   | 3 | 173833700 | 5 | 0.059857 |
| rs3733023  | AADACL1   | 3 | 173833700 | 3 | 0.039175 |
| rs3733023  | AADACL1   | 3 | 173833700 | 4 | 0.824861 |
| rs16846616 | SPATA16   | 3 | 174317776 | 7 | 0.271105 |
| rs16846616 | SPATA16   | 3 | 174317776 | 3 | 0.091914 |
| rs9290502  | LOC647212 | 3 | 175751228 | 5 | 0.583338 |
| rs9290502  | LOC647212 | 3 | 175751228 | 3 | 1.385386 |
| rs10222515 | TBL1XR1   | 3 | 178224424 | 2 | 2.045921 |
| rs10222515 | TBL1XR1   | 3 | 178224424 | 3 | 5.501732 |
| rs10222515 | TBL1XR1   | 3 | 178224424 | 1 | 1.135711 |
| rs6443583  | KCNMB2    | 3 | 180043275 | 2 | 1.683601 |
| rs6443583  | KCNMB2    | 3 | 180043275 | 5 | 0.234977 |
| rs6443583  | KCNMB2    | 3 | 180043275 | 6 | 1.226029 |
| rs1183319  | KCNMB3    | 3 | 180451801 | 4 | 0.813364 |
| rs1183319  | KCNMB3    | 3 | 180451801 | 5 | 0.108346 |
| rs1183319  | KCNMB3    | 3 | 180451801 | 7 | 0.283164 |
| rs1183319  | KCNMB3    | 3 | 180451801 | 8 | 0.150319 |
| rs11720871 | KCNMB3    | 3 | 180459471 | 1 | 3.478771 |
| rs11720871 | KCNMB3    | 3 | 180459471 | 8 | 1.076271 |
| rs11720871 | KCNMB3    | 3 | 180459471 | 7 | 1.763478 |
| rs11720871 | KCNMB3    | 3 | 180459471 | 4 | 1.328644 |
| rs10936996 | KCNMB3    | 3 | 180459768 | 6 | 0.387529 |
| rs10936996 | KCNMB3    | 3 | 180459768 | 7 | 0.531027 |
| rs13324543 | ACTL6A    | 3 | 180781693 | 1 | 3.528549 |

|            |           |   |           |   |          |
|------------|-----------|---|-----------|---|----------|
| rs13324543 | ACTL6A    | 3 | 180781693 | 6 | 0.336204 |
| rs13324543 | ACTL6A    | 3 | 180781693 | 8 | 0.180125 |
| rs2276803  | USP13     | 3 | 180853848 | 8 | 4.819655 |
| rs2276803  | USP13     | 3 | 180853848 | 2 | 4.634767 |
| rs9867478  | LOC131054 | 3 | 181524772 | 6 | 3.767992 |
| rs1532485  | TTC14     | 3 | 181802675 | 2 | 0.528604 |
| rs1532485  | TTC14     | 3 | 181802675 | 4 | 0.541204 |
| rs1532485  | TTC14     | 3 | 181802675 | 1 | 1.129263 |
| rs2270968  | MCCC1     | 3 | 184237903 | 2 | 3.47133  |
| rs2270968  | MCCC1     | 3 | 184237903 | 6 | 6.071858 |
| rs35070271 | MCF2L2    | 3 | 184380614 | 8 | 3.140899 |
| rs35070271 | MCF2L2    | 3 | 184380614 | 4 | 3.072695 |
| rs3755648  | KLHL24    | 3 | 184850910 | 4 | 0.137558 |
| rs9856997  | KLHL24    | 3 | 184880201 | 4 | 3.653937 |
| rs2606225  | MAP6D1    | 3 | 185017181 | 2 | 2.461446 |
| rs2606225  | MAP6D1    | 3 | 185017181 | 6 | 0.446911 |
| rs2606225  | MAP6D1    | 3 | 185017181 | 3 | 0.226215 |
| rs2606225  | MAP6D1    | 3 | 185017181 | 1 | 0.137455 |
| rs2255019  | MAP6D1    | 3 | 185017607 | 1 | 1.083355 |
| rs2255019  | MAP6D1    | 3 | 185017607 | 2 | 0.785156 |
| rs2255019  | MAP6D1    | 3 | 185017607 | 3 | 0.358286 |
| rs3732581  | PARL      | 3 | 185041096 | 3 | 0.422302 |
| rs3732581  | PARL      | 3 | 185041096 | 1 | 0.359191 |
| rs3732581  | PARL      | 3 | 185041096 | 2 | 3.277295 |
| rs3732581  | PARL      | 3 | 185041096 | 8 | 8.406983 |
| rs3732581  | PARL      | 3 | 185041096 | 5 | 3.106396 |
| rs3805114  | ABCC5     | 3 | 185120416 | 4 | 4.519441 |
| rs562      | ABCC5     | 3 | 185120539 | 8 | 5.265552 |
| rs562      | ABCC5     | 3 | 185120539 | 4 | 0.154019 |
| rs562      | ABCC5     | 3 | 185120539 | 1 | 6.165818 |
| rs562      | ABCC5     | 3 | 185120539 | 5 | 0.283539 |
| rs7636910  | ABCC5     | 3 | 185182210 | 1 | 5.516853 |
| rs7636910  | ABCC5     | 3 | 185182210 | 5 | 0.725295 |
| rs7636910  | ABCC5     | 3 | 185182210 | 4 | 1.171901 |
| rs6443930  | HTR3D     | 3 | 185236988 | 5 | 0.538006 |
| rs6807670  | HTR3C     | 3 | 185260992 | 1 | 4.155696 |
| rs6807670  | HTR3C     | 3 | 185260992 | 2 | 5.341366 |
| rs6807670  | HTR3C     | 3 | 185260992 | 5 | 4.326336 |
| rs34611203 | HTR3E     | 3 | 185300666 | 2 | 1.25312  |
| rs11545172 | PSMD2     | 3 | 185502375 | 3 | 0.118943 |
| rs11545172 | PSMD2     | 3 | 185502375 | 1 | 3.51653  |
| rs2230571  | EIF4G1    | 3 | 185529164 | 7 | 0.222455 |
| rs2230571  | EIF4G1    | 3 | 185529164 | 2 | 4.8112   |
| rs2230571  | EIF4G1    | 3 | 185529164 | 4 | 2.647092 |
| rs13322510 | FAM131A   | 3 | 185541275 | 7 | 1.241462 |
| rs13322510 | FAM131A   | 3 | 185541275 | 1 | 0.809348 |
| rs13322510 | FAM131A   | 3 | 185541275 | 3 | 0.827968 |

|                |           |   |           |   |          |
|----------------|-----------|---|-----------|---|----------|
| rs2228291      | CLCN2     | 3 | 185557741 | 1 | 0.041218 |
| rs2228291      | CLCN2     | 3 | 185557741 | 7 | 0.105596 |
| rs11916995     | LOC391600 | 3 | 185700371 | 3 | 0.583211 |
| rs12011        | MAGEF1    | 3 | 185912412 | 3 | 0.534377 |
| rs12011        | MAGEF1    | 3 | 185912412 | 2 | 0.402615 |
| rs12011        | MAGEF1    | 3 | 185912412 | 1 | 0.301183 |
| rs11555405     | VPS8      | 3 | 186183120 | 5 | 0.968442 |
| rs11555405     | VPS8      | 3 | 186183120 | 3 | 0.423931 |
| rs11555405     | VPS8      | 3 | 186183120 | 1 | 1.6954   |
| rs1043435      | LOC285382 | 3 | 186280459 | 1 | 1.407575 |
| rs1043435      | LOC285382 | 3 | 186280459 | 5 | 0.509528 |
| rs1043435      | LOC285382 | 3 | 186280459 | 4 | 0.128832 |
| rs6444028      | LOC285382 | 3 | 186280816 | 4 | 1.295969 |
| rs16859583     | LOC285382 | 3 | 186280982 | 5 | 0.085962 |
| rs11919970     | EHHADH    | 3 | 186392827 | 1 | 4.998409 |
| rs11919970     | EHHADH    | 3 | 186392827 | 5 | 0.049324 |
| rs13099317     | LOC647276 | 3 | 186618142 | 3 | 4.59492  |
| rs13099317     | LOC647276 | 3 | 186618142 | 8 | 5.226738 |
| rs13099317     | LOC647276 | 3 | 186618142 | 5 | 3.824565 |
| rs13099317     | LOC647276 | 3 | 186618142 | 2 | 6.562023 |
| rs13099317     | LOC647276 | 3 | 186618142 | 7 | 2.983825 |
| rs13099317     | LOC647276 | 3 | 186618142 | 6 | 3.538055 |
| rs13099317     | LOC647276 | 3 | 186618142 | 4 | 4.264822 |
| SNP3-186629193 | MAP3K13   | 3 | 186629193 | 4 | 6.368631 |
| rs2575         | DGKG      | 3 | 187350085 | 6 | 3.869754 |
| rs2575         | DGKG      | 3 | 187350085 | 5 | 3.702217 |
| rs2575         | DGKG      | 3 | 187350085 | 2 | 3.791066 |
| rs2574         | DGKG      | 3 | 187350244 | 5 | 0.376573 |
| rs2574         | DGKG      | 3 | 187350244 | 6 | 4.851003 |
| rs2574         | DGKG      | 3 | 187350244 | 2 | 2.870521 |
| rs1047115      | FETUB     | 3 | 187841060 | 1 | 1.375841 |
| rs1047115      | FETUB     | 3 | 187841060 | 3 | 0.74843  |
| SNP3-187877807 | HRG       | 3 | 187877807 | 1 | 0.263236 |
| SNP3-187877807 | HRG       | 3 | 187877807 | 5 | 0.407267 |
| SNP3-187877807 | HRG       | 3 | 187877807 | 4 | 0.568679 |
| SNP3-187877807 | HRG       | 3 | 187877807 | 2 | 0.813086 |
| rs1042445      | HRG       | 3 | 187878130 | 4 | 1.494271 |
| rs1042445      | HRG       | 3 | 187878130 | 5 | 1.483679 |
| rs1042445      | HRG       | 3 | 187878130 | 2 | 2.42375  |
| rs1042445      | HRG       | 3 | 187878130 | 3 | 0.118665 |
| rs1050274      | KNG1      | 3 | 187918064 | 1 | 0.784035 |
| rs4686837      | ST6GAL1   | 3 | 188222371 | 3 | 0.178836 |
| rs888390       | RTP1      | 3 | 188401130 | 8 | 0.094662 |
| rs1109452      | MASP1     | 3 | 188435282 | 1 | 0.629607 |
| rs850312       | MASP1     | 3 | 188436502 | 1 | 2.248605 |
| SNP3-188571350 | RTP4      | 3 | 188571350 | 2 | 6.66839  |
| SNP3-188571350 | RTP4      | 3 | 188571350 | 1 | 0.173916 |

|                |           |   |           |   |          |
|----------------|-----------|---|-----------|---|----------|
| SNP3-188571350 | RTP4      | 3 | 188571350 | 6 | 1.312533 |
| SNP3-188571350 | RTP4      | 3 | 188571350 | 7 | 0.291503 |
| rs1533595      | RTP4      | 3 | 188571597 | 4 | 7.630363 |
| rs1533595      | RTP4      | 3 | 188571597 | 3 | 0.693959 |
| rs1533595      | RTP4      | 3 | 188571597 | 1 | 4.542516 |
| rs1533595      | RTP4      | 3 | 188571597 | 6 | 5.129022 |
| rs1533595      | RTP4      | 3 | 188571597 | 5 | 0.645345 |
| SNP3-188928905 | BCL6      | 3 | 188928905 | 2 | 0.303711 |
| SNP3-188928905 | BCL6      | 3 | 188928905 | 8 | 0.534087 |
| rs13096262     | FLJ42393  | 3 | 189379606 | 5 | 3.320053 |
| rs13096262     | FLJ42393  | 3 | 189379606 | 1 | 2.074966 |
| rs13096262     | FLJ42393  | 3 | 189379606 | 6 | 2.425188 |
| rs344952       | FLJ42393  | 3 | 189381287 | 4 | 2.075259 |
| rs344952       | FLJ42393  | 3 | 189381287 | 3 | 2.326017 |
| rs344952       | FLJ42393  | 3 | 189381287 | 6 | 2.043333 |
| rs344952       | FLJ42393  | 3 | 189381287 | 5 | 1.720632 |
| rs1136644      | LPP       | 3 | 190073140 | 6 | 3.245493 |
| rs1136644      | LPP       | 3 | 190073140 | 4 | 0.845997 |
| rs1136644      | LPP       | 3 | 190073140 | 1 | 2.216343 |
| rs1136644      | LPP       | 3 | 190073140 | 7 | 0.707633 |
| rs1136644      | LPP       | 3 | 190073140 | 5 | 4.946322 |
| rs1136644      | LPP       | 3 | 190073140 | 8 | 1.447743 |
| rs9847957      | FAM79B    | 3 | 190372530 | 3 | 0.162259 |
| rs1055152      | FAM79B    | 3 | 190521342 | 8 | 0.196327 |
| rs1055152      | FAM79B    | 3 | 190521342 | 3 | 0.451173 |
| rs9851974      | FAM79B    | 3 | 190522305 | 4 | 0.362274 |
| rs17489176     | FAM79B    | 3 | 190523207 | 3 | 0.265814 |
| rs9861864      | FAM79B    | 3 | 190523798 | 8 | 0.491013 |
| rs9861864      | FAM79B    | 3 | 190523798 | 3 | 0.812747 |
| rs9861864      | FAM79B    | 3 | 190523798 | 2 | 3.08129  |
| rs536435       | LOC391603 | 3 | 191367563 | 2 | 3.908895 |
| rs6788319      | UTS2D     | 3 | 192482611 | 1 | 0.178292 |
| rs6444535      | UTS2D     | 3 | 192482684 | 1 | 0.548938 |
| rs6444535      | UTS2D     | 3 | 192482684 | 5 | 1.236154 |
| rs35340712     | CCDC50    | 3 | 192558596 | 1 | 2.765629 |
| rs35340712     | CCDC50    | 3 | 192558596 | 5 | 0.56959  |
| rs1460924      | FGF12     | 3 | 193343229 | 5 | 1.083187 |
| rs1460924      | FGF12     | 3 | 193343229 | 3 | 0.242917 |
| rs1460923      | FGF12     | 3 | 193343425 | 3 | 0.105455 |
| rs1460923      | FGF12     | 3 | 193343425 | 5 | 0.822159 |
| rs11720096     | FGF12     | 3 | 193343750 | 4 | 0.017109 |
| rs11720096     | FGF12     | 3 | 193343750 | 5 | 1.036328 |
| rs11720096     | FGF12     | 3 | 193343750 | 3 | 0.536155 |
| rs10049459     | FGF12     | 3 | 193343809 | 3 | 0.634783 |
| rs10049459     | FGF12     | 3 | 193343809 | 5 | 1.190302 |
| rs10049459     | FGF12     | 3 | 193343809 | 4 | 0.109196 |
| rs1460922      | FGF12     | 3 | 193344215 | 5 | 1.416884 |

|                |         |   |           |   |          |
|----------------|---------|---|-----------|---|----------|
| rs1460922      | FGF12   | 3 | 193344215 | 3 | 0.693188 |
| rs2271791      | ATP13A5 | 3 | 194477237 | 8 | 1.190625 |
| rs2271791      | ATP13A5 | 3 | 194477237 | 5 | 0.157671 |
| rs6797429      | ATP13A5 | 3 | 194563108 | 6 | 2.202814 |
| rs6797429      | ATP13A5 | 3 | 194563108 | 5 | 1.143304 |
| rs6797429      | ATP13A5 | 3 | 194563108 | 2 | 4.663644 |
| rs6797429      | ATP13A5 | 3 | 194563108 | 8 | 0.331371 |
| rs6797429      | ATP13A5 | 3 | 194563108 | 3 | 0.423596 |
| rs6797429      | ATP13A5 | 3 | 194563108 | 4 | 2.877912 |
| rs35424709     | ATP13A4 | 3 | 194654673 | 6 | 0.234549 |
| rs3796181      | ATP13A4 | 3 | 194666511 | 1 | 3.818838 |
| rs3796181      | ATP13A4 | 3 | 194666511 | 5 | 0.89406  |
| rs3796181      | ATP13A4 | 3 | 194666511 | 7 | 0.423953 |
| SNP3-194819370 | OPA1    | 3 | 194819370 | 5 | 1.667061 |
| rs11713634     | CPN2    | 3 | 195543273 | 4 | 4.850522 |
| rs3732477      | CPN2    | 3 | 195544214 | 5 | 2.464583 |
| rs15304        | LSG1    | 3 | 195842965 | 2 | 0.8307   |
| rs15304        | LSG1    | 3 | 195842965 | 7 | 6.963552 |
| rs15304        | LSG1    | 3 | 195842965 | 6 | 0.285104 |
| rs35480846     | LSG1    | 3 | 195854753 | 5 | 9.209285 |
| rs1773218      | FAM43A  | 3 | 195888309 | 7 | 1.046332 |
| rs1773218      | FAM43A  | 3 | 195888309 | 2 | 5.526954 |
| rs3752798      | FAM43A  | 3 | 195888694 | 5 | 0.138423 |
| rs9870815      | MUC20   | 3 | 196938876 | 7 | 2.174263 |
| rs9870815      | MUC20   | 3 | 196938876 | 2 | 1.006527 |
| SNP3-196947657 | MUC20   | 3 | 196947657 | 4 | 3.439183 |
| rs2291652      | MUC4    | 3 | 196963462 | 3 | 1.177499 |
| rs2291652      | MUC4    | 3 | 196963462 | 5 | 0.952577 |
| rs2291652      | MUC4    | 3 | 196963462 | 4 | 0.923398 |
| rs2291652      | MUC4    | 3 | 196963462 | 1 | 1.040636 |
| rs2246901      | MUC4    | 3 | 196974680 | 3 | 0.304393 |
| rs2550240      | MUC4    | 3 | 196981550 | 7 | 0.549885 |
| rs2550240      | MUC4    | 3 | 196981550 | 1 | 0.854612 |
| rs2550240      | MUC4    | 3 | 196981550 | 5 | 2.801824 |
| rs2550240      | MUC4    | 3 | 196981550 | 3 | 1.74439  |
| rs2259102      | MUC4    | 3 | 196982808 | 3 | 0.313853 |
| rs2259292      | MUC4    | 3 | 196986783 | 7 | 0.816403 |
| rs2259292      | MUC4    | 3 | 196986783 | 5 | 1.46054  |
| rs2688513      | MUC4    | 3 | 196990443 | 3 | 3.643648 |
| SNP3-197000121 | MUC4    | 3 | 197000121 | 7 | 0.436212 |
| rs3749331      | MUC4    | 3 | 197000700 | 5 | 0.421605 |
| rs2177336      | MUC4    | 3 | 197001273 | 7 | 5.425425 |
| rs2177336      | MUC4    | 3 | 197001273 | 3 | 0.40786  |
| rs1806440      | MUC4    | 3 | 197001519 | 5 | 0.885806 |
| rs1106502      | MUC4    | 3 | 197001653 | 3 | 0.947543 |
| rs1106502      | MUC4    | 3 | 197001653 | 7 | 0.787384 |
| rs1104760      | MUC4    | 3 | 197001716 | 3 | 1.126149 |

|                |           |   |           |   |          |
|----------------|-----------|---|-----------|---|----------|
| rs1104760      | MUC4      | 3 | 197001716 | 7 | 0.692476 |
| rs882605       | MUC4      | 3 | 197001948 | 3 | 0.55896  |
| rs13433937     | TNK2      | 3 | 197075453 | 4 | 1.536763 |
| SNP3-197078865 | TNK2      | 3 | 197078865 | 8 | 1.172413 |
| SNP3-197078865 | TNK2      | 3 | 197078865 | 3 | 0.997922 |
| SNP3-197078865 | TNK2      | 3 | 197078865 | 6 | 0.168529 |
| SNP3-197078865 | TNK2      | 3 | 197078865 | 7 | 1.021136 |
| SNP3-197078865 | TNK2      | 3 | 197078865 | 5 | 0.332135 |
| SNP3-197078865 | TNK2      | 3 | 197078865 | 4 | 1.947248 |
| SNP3-197078865 | TNK2      | 3 | 197078865 | 2 | 8.142344 |
| SNP3-197078865 | TNK2      | 3 | 197078865 | 1 | 0.393772 |
| rs1522394      | ZDHHHC19  | 3 | 197422574 | 3 | 0.811373 |
| rs1522394      | ZDHHHC19  | 3 | 197422574 | 1 | 0.301707 |
| rs36016914     | TM4SF19   | 3 | 197535259 | 3 | 0.750289 |
| rs6785339      | TM4SF19   | 3 | 197538836 | 3 | 2.082017 |
| rs6785339      | TM4SF19   | 3 | 197538836 | 1 | 3.096716 |
| rs6785339      | TM4SF19   | 3 | 197538836 | 5 | 0.363873 |
| rs6785339      | TM4SF19   | 3 | 197538836 | 8 | 1.006755 |
| rs6785339      | TM4SF19   | 3 | 197538836 | 4 | 0.920182 |
| rs11185525     | UBXD7     | 3 | 197564561 | 2 | 5.336094 |
| SNP3-198097498 | SENP5     | 3 | 198097498 | 3 | 0.15414  |
| rs335824       | LOC152217 | 3 | 198154309 | 3 | 0.276576 |
| rs335824       | LOC152217 | 3 | 198154309 | 2 | 5.904752 |
| rs335824       | LOC152217 | 3 | 198154309 | 1 | 0.398964 |
| rs45625439     | MF12      | 3 | 198226640 | 7 | 0.081187 |
| SNP3-198916433 | KIAA0226  | 3 | 198916433 | 3 | 0.616399 |
| SNP3-198916433 | KIAA0226  | 3 | 198916433 | 1 | 4.912644 |
| rs3205525      | FYTTD1    | 3 | 198979731 | 7 | 0.057209 |
| rs1273557      | FYTTD1    | 3 | 198993495 | 2 | 6.018017 |
| rs1273557      | FYTTD1    | 3 | 198993495 | 7 | 1.638809 |
| rs36078463     | LRCH3     | 3 | 199063863 | 5 | 0.387955 |
| rs17720399     | ABCA11    | 4 | 409955    | 3 | 0.250435 |
| rs13150531     | PIGG      | 4 | 507622    | 8 | 5.359529 |
| SNP4-510853    | PIGG      | 4 | 510853    | 8 | 6.767512 |
| SNP4-517677    | PIGG      | 4 | 517677    | 8 | 7.015766 |
| GA022032       | ATP5I     | 4 | 658009    | 4 | 3.156196 |
| rs2242237      | CPLX1     | 4 | 769394    | 4 | 0.278509 |
| rs2242237      | CPLX1     | 4 | 769394    | 8 | 3.878696 |
| rs2242237      | CPLX1     | 4 | 769394    | 2 | 2.818616 |
| rs1026738      | GAK       | 4 | 848941    | 6 | 2.156795 |
| rs35117553     | DGKQ      | 4 | 950542    | 2 | 1.615055 |
| rs4583705      | SLC26A1   | 4 | 963036    | 1 | 4.212418 |
| rs3796622      | SLC26A1   | 4 | 973060    | 6 | 0.164379 |
| rs3796622      | SLC26A1   | 4 | 973060    | 1 | 1.616294 |
| rs6836258      | IDUA      | 4 | 986248    | 6 | 5.023711 |
| rs6836258      | IDUA      | 4 | 986248    | 7 | 0.39451  |
| SNP4-986690    | IDUA      | 4 | 986690    | 7 | 0.463979 |



|              |          |   |         |   |          |
|--------------|----------|---|---------|---|----------|
| rs17728127   | RNF212   | 4 | 1056769 | 5 | 5.882386 |
| rs2279279    | SPON2    | 4 | 1154277 | 5 | 0.988884 |
| rs2279279    | SPON2    | 4 | 1154277 | 7 | 1.949385 |
| rs2279279    | SPON2    | 4 | 1154277 | 6 | 0.648777 |
| rs2279279    | SPON2    | 4 | 1154277 | 2 | 0.342572 |
| SNP4-1155748 | SPON2    | 4 | 1155748 | 6 | 0.638337 |
| SNP4-1155748 | SPON2    | 4 | 1155748 | 5 | 0.898917 |
| SNP4-1155748 | SPON2    | 4 | 1155748 | 7 | 0.254974 |
| GA003867     | SPON2    | 4 | 1155764 | 2 | 4.100789 |
| rs1680030    | C4orf42  | 4 | 1235500 | 6 | 5.777371 |
| rs1680030    | C4orf42  | 4 | 1235500 | 3 | 0.169085 |
| rs1680030    | C4orf42  | 4 | 1235500 | 7 | 5.306355 |
| rs28522910   | KIAA1530 | 4 | 1364774 | 3 | 0.921335 |
| rs28522910   | KIAA1530 | 4 | 1364774 | 5 | 1.210299 |
| rs6599309    | CRIPAK   | 4 | 1378115 | 5 | 0.121373 |
| rs6599309    | CRIPAK   | 4 | 1378115 | 3 | 0.661339 |
| rs2247341    | SLBP     | 4 | 1671115 | 5 | 4.657694 |
| rs2247341    | SLBP     | 4 | 1671115 | 1 | 4.392063 |
| rs2247341    | SLBP     | 4 | 1671115 | 4 | 1.114228 |
| rs17802877   | TMEM129  | 4 | 1690144 | 7 | 3.284176 |
| rs17802877   | TMEM129  | 4 | 1690144 | 1 | 4.838395 |
| rs17802877   | TMEM129  | 4 | 1690144 | 3 | 1.193651 |
| rs17802877   | TMEM129  | 4 | 1690144 | 4 | 0.278665 |
| SNP4-1699354 | TACC3    | 4 | 1699354 | 3 | 0.242631 |
| SNP4-1699354 | TACC3    | 4 | 1699354 | 5 | 0.579072 |
| rs1063742    | TACC3    | 4 | 1699458 | 7 | 0.184089 |
| rs1063742    | TACC3    | 4 | 1699458 | 3 | 0.894444 |
| rs1063742    | TACC3    | 4 | 1699458 | 4 | 4.577109 |
| rs1063742    | TACC3    | 4 | 1699458 | 1 | 4.338339 |
| SNP4-1699751 | TACC3    | 4 | 1699751 | 4 | 0.559394 |
| SNP4-1699751 | TACC3    | 4 | 1699751 | 7 | 0.167542 |
| SNP4-1699751 | TACC3    | 4 | 1699751 | 3 | 0.126877 |
| SNP4-1699751 | TACC3    | 4 | 1699751 | 1 | 4.912986 |
| rs1063743    | TACC3    | 4 | 1699786 | 7 | 5.668199 |
| rs1063743    | TACC3    | 4 | 1699786 | 3 | 0.546686 |
| rs798757     | TACC3    | 4 | 1700013 | 2 | 4.492861 |
| rs11248073   | TACC3    | 4 | 1707300 | 1 | 5.361089 |
| rs11248073   | TACC3    | 4 | 1707300 | 4 | 2.086488 |
| rs11248073   | TACC3    | 4 | 1707300 | 8 | 2.06728  |
| rs11248073   | TACC3    | 4 | 1707300 | 5 | 0.815529 |
| rs11248073   | TACC3    | 4 | 1707300 | 7 | 1.829722 |
| rs28681468   | LETM1    | 4 | 1793818 | 2 | 1.535316 |
| rs10488835   | WHSC1    | 4 | 1917122 | 5 | 1.426658 |
| rs10488836   | POLN     | 4 | 2130692 | 1 | 5.162923 |
| rs9328764    | POLN     | 4 | 2146252 | 1 | 4.420361 |
| rs10011549   | POLN     | 4 | 2164744 | 1 | 4.592297 |
| rs10018786   | POLN     | 4 | 2164822 | 1 | 2.397313 |

|              |         |   |         |   |          |
|--------------|---------|---|---------|---|----------|
| rs2353552    | POLN    | 4 | 2179863 | 7 | 0.155638 |
| rs2353552    | POLN    | 4 | 2179863 | 3 | 0.053095 |
| rs2353552    | POLN    | 4 | 2179863 | 5 | 0.127504 |
| rs1052682    | MXD4    | 4 | 2221999 | 1 | 3.410751 |
| rs2051561    | ZFYVE28 | 4 | 2245633 | 5 | 0.786511 |
| rs2051561    | ZFYVE28 | 4 | 2245633 | 7 | 0.327515 |
| rs661301     | ZFYVE28 | 4 | 2275851 | 1 | 0.726575 |
| rs661301     | ZFYVE28 | 4 | 2275851 | 3 | 0.04619  |
| rs661301     | ZFYVE28 | 4 | 2275851 | 7 | 0.146301 |
| rs17768776   | ZFYVE28 | 4 | 2276057 | 1 | 0.985035 |
| rs16843413   | SH3BP2  | 4 | 2796710 | 7 | 0.747696 |
| rs16843413   | SH3BP2  | 4 | 2796710 | 4 | 0.212556 |
| rs1263416    | SH3BP2  | 4 | 2807561 | 8 | 0.439697 |
| rs1263416    | SH3BP2  | 4 | 2807561 | 7 | 0.030736 |
| rs1263416    | SH3BP2  | 4 | 2807561 | 3 | 0.597327 |
| rs10021191   | GRK4    | 4 | 2935493 | 2 | 2.014772 |
| rs10021191   | GRK4    | 4 | 2935493 | 7 | 1.716791 |
| rs10021191   | GRK4    | 4 | 2935493 | 3 | 8.775448 |
| rs10021191   | GRK4    | 4 | 2935493 | 4 | 0.050369 |
| rs10021191   | GRK4    | 4 | 2935493 | 5 | 0.973554 |
| rs2960306    | GRK4    | 4 | 2960297 | 3 | 2.791297 |
| rs2960306    | GRK4    | 4 | 2960297 | 2 | 3.387229 |
| rs2960306    | GRK4    | 4 | 2960297 | 7 | 3.18423  |
| rs2960306    | GRK4    | 4 | 2960297 | 5 | 2.787011 |
| rs2960306    | GRK4    | 4 | 2960297 | 4 | 2.906946 |
| rs1024323    | GRK4    | 4 | 2975841 | 7 | 2.330321 |
| rs1024323    | GRK4    | 4 | 2975841 | 4 | 2.856694 |
| rs1024323    | GRK4    | 4 | 2975841 | 5 | 2.038662 |
| rs1024323    | GRK4    | 4 | 2975841 | 3 | 2.259416 |
| rs35605687   | GRK4    | 4 | 2985351 | 3 | 1.277228 |
| rs35605687   | GRK4    | 4 | 2985351 | 5 | 1.647286 |
| rs35605687   | GRK4    | 4 | 2985351 | 1 | 2.92222  |
| rs1801058    | GRK4    | 4 | 3008948 | 7 | 5.093779 |
| SNP4-3118368 | HTT     | 4 | 3118368 | 7 | 3.312436 |
| rs363125     | HTT     | 4 | 3159345 | 6 | 1.00978  |
| rs362304     | HTT     | 4 | 3212070 | 2 | 3.640199 |
| rs362304     | HTT     | 4 | 3212070 | 6 | 6.849522 |
| rs3213507    | RGS12   | 4 | 3387643 | 3 | 0.02524  |
| rs3213507    | RGS12   | 4 | 3387643 | 2 | 0.848588 |
| rs3213507    | RGS12   | 4 | 3387643 | 7 | 0.855353 |
| rs3748034    | HGFAC   | 4 | 3415889 | 1 | 0.498162 |
| rs6811423    | DOK7    | 4 | 3464398 | 1 | 4.958227 |
| rs6811423    | DOK7    | 4 | 3464398 | 5 | 2.993357 |
| rs6811423    | DOK7    | 4 | 3464398 | 4 | 0.123844 |
| rs6811856    | DOK7    | 4 | 3464624 | 5 | 0.202723 |
| rs6811856    | DOK7    | 4 | 3464624 | 4 | 4.143254 |
| rs6811856    | DOK7    | 4 | 3464624 | 1 | 0.720468 |

|              |         |   |         |   |          |
|--------------|---------|---|---------|---|----------|
| rs6831659    | DOK7    | 4 | 3464645 | 5 | 1.233222 |
| rs6831659    | DOK7    | 4 | 3464645 | 1 | 1.794866 |
| rs6850908    | DOK7    | 4 | 3464696 | 4 | 0.663482 |
| rs6850908    | DOK7    | 4 | 3464696 | 5 | 0.503049 |
| rs6850908    | DOK7    | 4 | 3464696 | 1 | 1.471832 |
| rs11733064   | DOK7    | 4 | 3465081 | 7 | 5.06458  |
| rs1054662    | DOK7    | 4 | 3465948 | 8 | 0.862414 |
| rs1054662    | DOK7    | 4 | 3465948 | 2 | 0.997092 |
| rs1054662    | DOK7    | 4 | 3465948 | 1 | 0.730598 |
| SNP4-3489560 | LRPAP1  | 4 | 3489560 | 6 | 0.089898 |
| SNP4-3489560 | LRPAP1  | 4 | 3489560 | 4 | 0.179527 |
| SNP4-3489560 | LRPAP1  | 4 | 3489560 | 7 | 0.749475 |
| rs45554432   | LRPAP1  | 4 | 3496440 | 4 | 0.257921 |
| rs45554432   | LRPAP1  | 4 | 3496440 | 7 | 0.589875 |
| rs2916464    | TMEM128 | 4 | 4300521 | 6 | 3.716464 |
| rs2916464    | TMEM128 | 4 | 4300521 | 2 | 0.240454 |
| rs2916464    | TMEM128 | 4 | 4300521 | 1 | 0.982582 |
| rs2916464    | TMEM128 | 4 | 4300521 | 5 | 1.133898 |
| SNP4-4300785 | TMEM128 | 4 | 4300785 | 6 | 0.318562 |
| rs2272746    | TMEM128 | 4 | 4300810 | 6 | 3.379863 |
| rs2272746    | TMEM128 | 4 | 4300810 | 5 | 1.840102 |
| rs2272746    | TMEM128 | 4 | 4300810 | 4 | 1.875536 |
| rs2272746    | TMEM128 | 4 | 4300810 | 2 | 3.59207  |
| rs2272739    | LYAR    | 4 | 4327376 | 7 | 0.450781 |
| rs1048898    | LYAR    | 4 | 4342733 | 2 | 2.101102 |
| rs1048898    | LYAR    | 4 | 4342733 | 4 | 3.216382 |
| rs1048898    | LYAR    | 4 | 4342733 | 3 | 0.792756 |
| rs1048898    | LYAR    | 4 | 4342733 | 1 | 0.045398 |
| rs10002237   | D4S234E | 4 | 4470512 | 2 | 4.746781 |
| rs16837029   | STK32B  | 4 | 5383992 | 7 | 0.594938 |
| rs2287576    | EVC2    | 4 | 5615092 | 5 | 0.338064 |
| rs2287576    | EVC2    | 4 | 5615092 | 2 | 1.228319 |
| rs4689278    | EVC2    | 4 | 5741803 | 3 | 0.830099 |
| rs4689278    | EVC2    | 4 | 5741803 | 8 | 0.977761 |
| rs4689278    | EVC2    | 4 | 5741803 | 1 | 3.660913 |
| rs4688962    | EVC     | 4 | 5800862 | 5 | 0.001982 |
| rs4688962    | EVC     | 4 | 5800862 | 1 | 0.32999  |
| rs4688962    | EVC     | 4 | 5800862 | 6 | 4.780247 |
| rs4688962    | EVC     | 4 | 5800862 | 4 | 0.438413 |
| rs4688962    | EVC     | 4 | 5800862 | 2 | 4.943091 |
| rs2279252    | EVC     | 4 | 5851395 | 2 | 2.476187 |
| rs1057052    | CRMP1   | 4 | 5873639 | 7 | 0.709386 |
| rs1057052    | CRMP1   | 4 | 5873639 | 6 | 1.826649 |
| rs1057052    | CRMP1   | 4 | 5873639 | 5 | 0.032416 |
| rs12331      | CRMP1   | 4 | 5889414 | 4 | 1.04538  |
| rs12331      | CRMP1   | 4 | 5889414 | 2 | 2.059579 |
| rs12331      | CRMP1   | 4 | 5889414 | 5 | 4.434945 |

|              |          |   |         |   |          |
|--------------|----------|---|---------|---|----------|
| rs12331      | CRMP1    | 4 | 5889414 | 7 | 7.152381 |
| rs12331      | CRMP1    | 4 | 5889414 | 1 | 0.437419 |
| rs12331      | CRMP1    | 4 | 5889414 | 3 | 1.931678 |
| rs9457       | WFS1     | 4 | 6355700 | 5 | 0.224947 |
| rs9457       | WFS1     | 4 | 6355700 | 8 | 0.226889 |
| rs9457       | WFS1     | 4 | 6355700 | 4 | 0.156467 |
| rs9457       | WFS1     | 4 | 6355700 | 3 | 0.107322 |
| rs9457       | WFS1     | 4 | 6355700 | 7 | 6.434613 |
| rs9457       | WFS1     | 4 | 6355700 | 2 | 0.121621 |
| SNP4-6666957 | MAN2B2   | 4 | 6666957 | 5 | 5.217422 |
| rs4689490    | MAN2B2   | 4 | 6670105 | 8 | 1.464913 |
| rs11737783   | S100P    | 4 | 6749565 | 2 | 6.223823 |
| rs3822268    | KIAA0232 | 4 | 6934415 | 2 | 1.092602 |
| rs3822268    | KIAA0232 | 4 | 6934415 | 3 | 0.155345 |
| rs6841334    | KIAA0232 | 4 | 6936197 | 1 | 0.042645 |
| rs6841334    | KIAA0232 | 4 | 6936197 | 6 | 0.950314 |
| rs6841334    | KIAA0232 | 4 | 6936197 | 3 | 0.155801 |
| rs6841334    | KIAA0232 | 4 | 6936197 | 7 | 0.791003 |
| rs6841334    | KIAA0232 | 4 | 6936197 | 2 | 1.58874  |
| rs6828784    | KIAA0232 | 4 | 6936716 | 4 | 0.566007 |
| rs6828784    | KIAA0232 | 4 | 6936716 | 5 | 0.028056 |
| rs3756255    | TBC1D14  | 4 | 7083825 | 6 | 1.136687 |
| rs3756255    | TBC1D14  | 4 | 7083825 | 2 | 4.362419 |
| rs3756255    | TBC1D14  | 4 | 7083825 | 8 | 0.400853 |
| rs3756255    | TBC1D14  | 4 | 7083825 | 7 | 0.056755 |
| rs3756255    | TBC1D14  | 4 | 7083825 | 3 | 0.070831 |
| rs868489     | MGC21874 | 4 | 7106154 | 3 | 0.482382 |
| rs868489     | MGC21874 | 4 | 7106154 | 2 | 1.650932 |
| rs868489     | MGC21874 | 4 | 7106154 | 7 | 1.025178 |
| rs11937667   | MGC21874 | 4 | 7107938 | 2 | 6.607241 |
| rs11937667   | MGC21874 | 4 | 7107938 | 7 | 0.206829 |
| rs10937782   | MGC21874 | 4 | 7108007 | 7 | 0.258876 |
| rs4689833    | SORCS2   | 4 | 7765390 | 3 | 0.936233 |
| rs4689833    | SORCS2   | 4 | 7765390 | 1 | 4.298505 |
| rs4689833    | SORCS2   | 4 | 7765390 | 5 | 1.996182 |
| rs28531835   | SORCS2   | 4 | 7767810 | 6 | 0.091338 |
| rs2285781    | SORCS2   | 4 | 7767912 | 6 | 2.386822 |
| rs2285781    | SORCS2   | 4 | 7767912 | 4 | 1.042456 |
| rs2285781    | SORCS2   | 4 | 7767912 | 7 | 2.67973  |
| rs13442      | SORCS2   | 4 | 7794183 | 7 | 1.594583 |
| rs4689158    | SORCS2   | 4 | 7794874 | 4 | 1.830629 |
| rs4689158    | SORCS2   | 4 | 7794874 | 3 | 0.760465 |
| rs4689158    | SORCS2   | 4 | 7794874 | 6 | 4.024841 |
| rs4689158    | SORCS2   | 4 | 7794874 | 5 | 0.839489 |
| rs12642285   | SORCS2   | 4 | 7794946 | 7 | 2.126173 |
| rs2285763    | AFAP1    | 4 | 7814204 | 7 | 2.27906  |
| rs2285762    | AFAP1    | 4 | 7814305 | 1 | 4.892335 |

|              |        |   |         |   |          |
|--------------|--------|---|---------|---|----------|
| rs2285762    | AFAP1  | 4 | 7814305 | 4 | 0.556495 |
| rs10155361   | AFAP1  | 4 | 7815031 | 2 | 6.609073 |
| rs10155361   | AFAP1  | 4 | 7815031 | 6 | 0.21824  |
| rs10155361   | AFAP1  | 4 | 7815031 | 4 | 3.977628 |
| rs10050114   | AFAP1  | 4 | 7815401 | 4 | 0.779432 |
| rs10050114   | AFAP1  | 4 | 7815401 | 2 | 7.833623 |
| rs10050114   | AFAP1  | 4 | 7815401 | 5 | 5.41067  |
| rs10050114   | AFAP1  | 4 | 7815401 | 6 | 0.820807 |
| rs2158274    | AFAP1  | 4 | 7815416 | 7 | 4.770772 |
| rs2158274    | AFAP1  | 4 | 7815416 | 4 | 0.650366 |
| rs2158274    | AFAP1  | 4 | 7815416 | 1 | 5.135209 |
| rs2285761    | AFAP1  | 4 | 7821623 | 7 | 1.492867 |
| rs4696886    | ABLIM2 | 4 | 8018583 | 2 | 4.872311 |
| rs2292735    | ABLIM2 | 4 | 8018775 | 2 | 6.0087   |
| rs2677605    | SH3TC1 | 4 | 8257983 | 2 | 2.418804 |
| rs2677605    | SH3TC1 | 4 | 8257983 | 8 | 1.193643 |
| rs2677605    | SH3TC1 | 4 | 8257983 | 3 | 1.760219 |
| rs2677605    | SH3TC1 | 4 | 8257983 | 1 | 2.4471   |
| rs2677605    | SH3TC1 | 4 | 8257983 | 5 | 1.320939 |
| rs2677605    | SH3TC1 | 4 | 8257983 | 7 | 1.638453 |
| rs1281138    | SH3TC1 | 4 | 8270929 | 3 | 1.490519 |
| rs1281148    | SH3TC1 | 4 | 8280613 | 5 | 0.011904 |
| rs1281148    | SH3TC1 | 4 | 8280613 | 8 | 4.648317 |
| rs1281148    | SH3TC1 | 4 | 8280613 | 7 | 1.121771 |
| rs1281148    | SH3TC1 | 4 | 8280613 | 4 | 0.722737 |
| rs1281148    | SH3TC1 | 4 | 8280613 | 1 | 1.196076 |
| rs1281148    | SH3TC1 | 4 | 8280613 | 2 | 0.464433 |
| rs1281151    | SH3TC1 | 4 | 8281135 | 7 | 0.834282 |
| rs1281151    | SH3TC1 | 4 | 8281135 | 1 | 1.138216 |
| rs1281151    | SH3TC1 | 4 | 8281135 | 5 | 0.917452 |
| rs1281151    | SH3TC1 | 4 | 8281135 | 4 | 0.440114 |
| rs8153       | SH3TC1 | 4 | 8293640 | 8 | 4.800613 |
| rs8153       | SH3TC1 | 4 | 8293640 | 3 | 0.052936 |
| rs708244     | ACOX3  | 4 | 8419504 | 7 | 4.344384 |
| rs3103097    | NULL   | 4 | 8563612 | 6 | 0.509675 |
| rs9685931    | GPR78  | 4 | 8639923 | 7 | 0.503852 |
| rs9799717    | GPR78  | 4 | 8640163 | 7 | 0.530328 |
| rs1131140    | CPZ    | 4 | 8666996 | 7 | 4.140897 |
| rs1131140    | CPZ    | 4 | 8666996 | 3 | 1.692795 |
| rs1050464    | CPZ    | 4 | 8672286 | 3 | 1.159802 |
| rs3733591    | SLC2A9 | 4 | 9531228 | 2 | 0.791572 |
| SNP4-9531268 | SLC2A9 | 4 | 9531268 | 6 | 0.369514 |
| rs3733589    | SLC2A9 | 4 | 9596422 | 2 | 7.514545 |
| rs6820230    | SLC2A9 | 4 | 9636640 | 6 | 0.558223 |
| rs6820230    | SLC2A9 | 4 | 9636640 | 3 | 1.771473 |
| rs6820230    | SLC2A9 | 4 | 9636640 | 5 | 0.182662 |
| rs13441      | WDR1   | 4 | 9708438 | 3 | 0.052955 |

|               |           |   |          |   |          |
|---------------|-----------|---|----------|---|----------|
| rs2109603     | LOC643446 | 4 | 10982054 | 4 | 2.536364 |
| rs2109603     | LOC643446 | 4 | 10982054 | 6 | 1.969449 |
| rs2109603     | LOC643446 | 4 | 10982054 | 3 | 2.452158 |
| rs13120194    | LOC643446 | 4 | 10982126 | 5 | 5.212269 |
| rs3822226     | NKX3-2    | 4 | 13151772 | 1 | 0.258182 |
| rs3822226     | NKX3-2    | 4 | 13151772 | 2 | 1.295923 |
| SNP4-13210435 | FAM44A    | 4 | 13210435 | 4 | 5.287276 |
| SNP4-13210435 | FAM44A    | 4 | 13210435 | 6 | 5.191435 |
| SNP4-13210435 | FAM44A    | 4 | 13210435 | 1 | 5.36976  |
| SNP4-13210435 | FAM44A    | 4 | 13210435 | 7 | 6.926945 |
| rs17745712    | FAM44A    | 4 | 13213516 | 8 | 0.148017 |
| rs17745712    | FAM44A    | 4 | 13213516 | 6 | 6.809587 |
| rs17745712    | FAM44A    | 4 | 13213516 | 7 | 5.674094 |
| rs12644869    | LOC152742 | 4 | 13722865 | 5 | 1.688026 |
| rs12644869    | LOC152742 | 4 | 13722865 | 4 | 1.46659  |
| rs12644869    | LOC152742 | 4 | 13722865 | 7 | 0.627735 |
| rs3846413     | LOC152742 | 4 | 13749309 | 2 | 4.74524  |
| rs4698714     | LOC152742 | 4 | 13750963 | 4 | 1.439239 |
| rs4698714     | LOC152742 | 4 | 13750963 | 1 | 0.892419 |
| rs4698714     | LOC152742 | 4 | 13750963 | 5 | 0.229314 |
| rs2314590     | C1QTNF7   | 4 | 15054631 | 4 | 0.110567 |
| rs2314590     | C1QTNF7   | 4 | 15054631 | 7 | 1.614633 |
| rs2314590     | C1QTNF7   | 4 | 15054631 | 2 | 4.809739 |
| rs13104095    | C1QTNF7   | 4 | 15055109 | 1 | 3.11083  |
| rs6815254     | LOC285550 | 4 | 15301156 | 1 | 3.499098 |
| rs6815254     | LOC285550 | 4 | 15301156 | 5 | 2.103891 |
| rs6815254     | LOC285550 | 4 | 15301156 | 3 | 0.070731 |
| rs2072313     | FGFBP1    | 4 | 15546829 | 3 | 1.121211 |
| rs758329      | FGFBP2    | 4 | 15573583 | 5 | 0.385229 |
| rs758329      | FGFBP2    | 4 | 15573583 | 3 | 0.2588   |
| rs758329      | FGFBP2    | 4 | 15573583 | 6 | 0.708821 |
| rs758329      | FGFBP2    | 4 | 15573583 | 8 | 0.835136 |
| rs758329      | FGFBP2    | 4 | 15573583 | 4 | 0.62281  |
| rs4698432     | FGFBP2    | 4 | 15573861 | 7 | 1.213154 |
| rs4698432     | FGFBP2    | 4 | 15573861 | 3 | 1.977438 |
| rs4698432     | FGFBP2    | 4 | 15573861 | 5 | 1.270233 |
| rs4698432     | FGFBP2    | 4 | 15573861 | 1 | 5.661673 |
| rs7686732     | PROM1     | 4 | 15579299 | 1 | 3.284713 |
| rs1046234     | TAPT1     | 4 | 15773551 | 2 | 2.596857 |
| rs872478      | LDB2      | 4 | 16113282 | 5 | 1.127604 |
| rs872478      | LDB2      | 4 | 16113282 | 1 | 2.004325 |
| rs699459      | QDPR      | 4 | 17097170 | 3 | 0.137102 |
| rs699459      | QDPR      | 4 | 17097170 | 5 | 0.417395 |
| rs2286771     | KIAA1276  | 4 | 17252946 | 7 | 1.160117 |
| rs2286771     | KIAA1276  | 4 | 17252946 | 5 | 0.030139 |
| rs7690457     | C4orf30   | 4 | 17414477 | 5 | 0.43103  |
| rs11941723    | NCAPG     | 4 | 17421626 | 5 | 0.212738 |

|               |          |   |          |   |          |
|---------------|----------|---|----------|---|----------|
| rs2074974     | NCAPG    | 4 | 17421713 | 8 | 0.214633 |
| rs2074974     | NCAPG    | 4 | 17421713 | 2 | 2.438637 |
| rs2074974     | NCAPG    | 4 | 17421713 | 6 | 0.45336  |
| rs2074974     | NCAPG    | 4 | 17421713 | 7 | 0.454261 |
| rs2302212     | NCAPG    | 4 | 17427983 | 6 | 1.896232 |
| rs2302212     | NCAPG    | 4 | 17427983 | 2 | 2.234311 |
| rs2302212     | NCAPG    | 4 | 17427983 | 7 | 1.23194  |
| rs2302212     | NCAPG    | 4 | 17427983 | 5 | 1.444789 |
| rs2302212     | NCAPG    | 4 | 17427983 | 1 | 1.594948 |
| SNP4-17428793 | NCAPG    | 4 | 17428793 | 2 | 3.7055   |
| SNP4-17428793 | NCAPG    | 4 | 17428793 | 1 | 3.820353 |
| SNP4-17428793 | NCAPG    | 4 | 17428793 | 3 | 4.455455 |
| SNP4-17428793 | NCAPG    | 4 | 17428793 | 6 | 3.248225 |
| SNP4-17428793 | NCAPG    | 4 | 17428793 | 5 | 1.687466 |
| SNP4-17428793 | NCAPG    | 4 | 17428793 | 4 | 2.422777 |
| rs7688403     | NCAPG    | 4 | 17454336 | 2 | 8.047567 |
| rs7688403     | NCAPG    | 4 | 17454336 | 6 | 0.556052 |
| rs7688403     | NCAPG    | 4 | 17454336 | 1 | 0.025208 |
| rs7688403     | NCAPG    | 4 | 17454336 | 7 | 0.033357 |
| rs7688403     | NCAPG    | 4 | 17454336 | 5 | 0.212185 |
| rs7655084     | SLIT2    | 4 | 19864404 | 5 | 0.680041 |
| rs7655084     | SLIT2    | 4 | 19864404 | 7 | 2.417361 |
| rs7655084     | SLIT2    | 4 | 19864404 | 3 | 0.609299 |
| rs7690492     | SLIT2    | 4 | 20153282 | 5 | 0.468189 |
| rs1379659     | SLIT2    | 4 | 20229781 | 2 | 2.595476 |
| rs1379659     | SLIT2    | 4 | 20229781 | 7 | 0.650423 |
| rs17552929    | C4orf28  | 4 | 20338064 | 8 | 5.86135  |
| rs12640448    | KCNIP4   | 4 | 20340430 | 1 | 3.465062 |
| rs12640448    | KCNIP4   | 4 | 20340430 | 5 | 1.616448 |
| rs12640448    | KCNIP4   | 4 | 20340430 | 6 | 0.179654 |
| rs3765122     | KCNIP4   | 4 | 20461342 | 8 | 1.634331 |
| rs3765122     | KCNIP4   | 4 | 20461342 | 2 | 5.363426 |
| rs3765122     | KCNIP4   | 4 | 20461342 | 7 | 0.803896 |
| rs870368      | KCNIP4   | 4 | 21155315 | 3 | 1.042093 |
| rs870368      | KCNIP4   | 4 | 21155315 | 5 | 1.149339 |
| rs966045      | UM9(5)   | 4 | 21457180 | 3 | 0.023839 |
| rs1513572     | UM9(5)   | 4 | 21459403 | 3 | 0.264481 |
| rs6821591     | PPARGC1A | 4 | 23406098 | 4 | 3.25514  |
| rs6821591     | PPARGC1A | 4 | 23406098 | 5 | 4.094298 |
| rs6821591     | PPARGC1A | 4 | 23406098 | 6 | 1.251171 |
| rs3755863     | PPARGC1A | 4 | 23424620 | 4 | 0.062994 |
| rs3755863     | PPARGC1A | 4 | 23424620 | 2 | 3.127691 |
| rs3755863     | PPARGC1A | 4 | 23424620 | 6 | 4.441472 |
| rs3755863     | PPARGC1A | 4 | 23424620 | 5 | 0.789435 |
| rs8192678     | PPARGC1A | 4 | 23424760 | 1 | 0.472355 |
| rs8192678     | PPARGC1A | 4 | 23424760 | 4 | 0.67181  |
| rs8192678     | PPARGC1A | 4 | 23424760 | 6 | 0.499859 |

|               |              |   |          |   |          |
|---------------|--------------|---|----------|---|----------|
| rs17574213    | PPARGC1A     | 4 | 23424779 | 4 | 1.379206 |
| rs2970847     | PPARGC1A     | 4 | 23425022 | 2 | 3.893989 |
| rs2970847     | PPARGC1A     | 4 | 23425022 | 7 | 0.267255 |
| SNP4-24410413 | SOD3         | 4 | 24410413 | 6 | 1.041095 |
| SNP4-24410413 | SOD3         | 4 | 24410413 | 2 | 1.779144 |
| GA022147      | SOD3         | 4 | 24411074 | 6 | 2.632321 |
| GA022147      | SOD3         | 4 | 24411074 | 2 | 0.48666  |
| rs12510565    | DKFZp761B107 | 4 | 24440301 | 6 | 0.349309 |
| rs16876184    | DKFZp761B107 | 4 | 24440548 | 5 | 0.837849 |
| rs12511680    | DKFZp761B107 | 4 | 24441407 | 6 | 0.283854 |
| rs16876189    | DKFZp761B107 | 4 | 24441822 | 5 | 0.437146 |
| rs8235        | LGI2         | 4 | 24612601 | 3 | 0.174829 |
| rs2232030     | LGI2         | 4 | 24614069 | 3 | 1.521658 |
| rs2232030     | LGI2         | 4 | 24614069 | 7 | 1.851108 |
| rs2232030     | LGI2         | 4 | 24614069 | 1 | 0.853398 |
| rs2232030     | LGI2         | 4 | 24614069 | 5 | 1.357968 |
| rs2232029     | LGI2         | 4 | 24614121 | 4 | 1.634611 |
| rs2232029     | LGI2         | 4 | 24614121 | 2 | 0.699112 |
| rs2232025     | LGI2         | 4 | 24614552 | 4 | 0.284407 |
| SNP4-24641233 | LGI2         | 4 | 24641233 | 5 | 2.036415 |
| rs6834255     | PI4K2B       | 4 | 24888418 | 6 | 0.009203 |
| rs2305670     | LOC389203    | 4 | 25524956 | 5 | 4.989396 |
| rs2305670     | LOC389203    | 4 | 25524956 | 1 | 4.471934 |
| rs2305670     | LOC389203    | 4 | 25524956 | 8 | 0.334035 |
| rs1488268     | FLJ45721     | 4 | 26818657 | 3 | 0.020879 |
| rs13130950    | FLJ45721     | 4 | 26818694 | 6 | 1.555473 |
| rs1047012     | PCDH7        | 4 | 30334794 | 4 | 0.480332 |
| rs1047012     | PCDH7        | 4 | 30334794 | 6 | 2.401456 |
| rs1047012     | PCDH7        | 4 | 30334794 | 1 | 4.111419 |
| rs977931      | PCDH7        | 4 | 30335085 | 6 | 0.689131 |
| rs977931      | PCDH7        | 4 | 30335085 | 1 | 4.861011 |
| rs977931      | PCDH7        | 4 | 30335085 | 4 | 1.764381 |
| rs2133514     | LOC645716    | 4 | 30822350 | 3 | 1.664786 |
| rs4833069     | CENTD1       | 4 | 35758273 | 4 | 0.341007 |
| rs4634233     | KIAA1239     | 4 | 37121710 | 4 | 0.167067 |
| rs4634233     | KIAA1239     | 4 | 37121710 | 3 | 0.511949 |
| rs11724784    | KIAA1239     | 4 | 37122280 | 3 | 0.468001 |
| rs936587      | KIAA1239     | 4 | 37125448 | 3 | 0.376701 |
| rs936587      | KIAA1239     | 4 | 37125448 | 7 | 0.679492 |
| rs936587      | KIAA1239     | 4 | 37125448 | 4 | 1.011245 |
| rs10569       | PGM2         | 4 | 37539780 | 7 | 3.948369 |
| rs10569       | PGM2         | 4 | 37539780 | 2 | 1.80973  |
| rs6811863     | PTTG2        | 4 | 37638581 | 5 | 3.745586 |
| rs6811863     | PTTG2        | 4 | 37638581 | 1 | 3.049134 |
| rs6811863     | PTTG2        | 4 | 37638581 | 3 | 1.69292  |
| rs6811863     | PTTG2        | 4 | 37638581 | 6 | 3.585967 |
| rs6811863     | PTTG2        | 4 | 37638581 | 2 | 3.213475 |



|               |           |   |          |   |          |
|---------------|-----------|---|----------|---|----------|
| SNP4-37699689 | TBC1D1    | 4 | 37699689 | 7 | 5.972377 |
| rs2637713     | FLJ13197  | 4 | 38303732 | 4 | 0.349162 |
| rs2637713     | FLJ13197  | 4 | 38303732 | 7 | 0.114673 |
| rs2637713     | FLJ13197  | 4 | 38303732 | 3 | 1.602698 |
| rs11096955    | TLR10     | 4 | 38452502 | 3 | 0.360723 |
| rs11096957    | TLR10     | 4 | 38452886 | 3 | 1.293061 |
| rs10856838    | TLR10     | 4 | 38453568 | 6 | 0.21683  |
| rs10856838    | TLR10     | 4 | 38453568 | 3 | 0.051644 |
| rs10856838    | TLR10     | 4 | 38453568 | 5 | 1.490963 |
| rs10856839    | TLR10     | 4 | 38453631 | 7 | 0.693704 |
| rs10856839    | TLR10     | 4 | 38453631 | 3 | 1.346524 |
| rs10856839    | TLR10     | 4 | 38453631 | 5 | 0.07463  |
| rs10856839    | TLR10     | 4 | 38453631 | 6 | 1.307481 |
| rs4274855     | TLR10     | 4 | 38453866 | 7 | 0.114296 |
| rs5743565     | TLR1      | 4 | 38482378 | 7 | 1.572896 |
| rs3821985     | TLR6      | 4 | 38506407 | 7 | 0.636628 |
| rs3821985     | TLR6      | 4 | 38506407 | 6 | 5.57988  |
| rs3821985     | TLR6      | 4 | 38506407 | 5 | 0.803029 |
| rs3821985     | TLR6      | 4 | 38506407 | 3 | 0.416514 |
| rs3821985     | TLR6      | 4 | 38506407 | 4 | 6.446559 |
| rs3821985     | TLR6      | 4 | 38506407 | 1 | 0.017836 |
| rs3821985     | TLR6      | 4 | 38506407 | 2 | 3.460969 |
| SNP4-38664360 | TMEM156   | 4 | 38664360 | 3 | 0.956755 |
| SNP4-38676700 | TMEM156   | 4 | 38676700 | 1 | 2.303035 |
| rs2711941     | KLHL5     | 4 | 38740557 | 4 | 1.051824 |
| rs3733276     | KLHL5     | 4 | 38793306 | 1 | 3.492274 |
| rs3733276     | KLHL5     | 4 | 38793306 | 3 | 0.471369 |
| rs3733276     | KLHL5     | 4 | 38793306 | 4 | 0.593156 |
| rs4975017     | KLB       | 4 | 39126624 | 1 | 3.941562 |
| rs4975017     | KLB       | 4 | 39126624 | 8 | 0.624028 |
| rs4975017     | KLB       | 4 | 39126624 | 3 | 1.138417 |
| rs2260645     | LOC401127 | 4 | 39159079 | 2 | 4.787752 |
| rs2260645     | LOC401127 | 4 | 39159079 | 4 | 3.284513 |
| rs6838749     | KRT18P25  | 4 | 39698436 | 2 | 0.766537 |
| rs6838749     | KRT18P25  | 4 | 39698436 | 6 | 1.086006 |
| rs6838749     | KRT18P25  | 4 | 39698436 | 7 | 3.651287 |
| rs6838749     | KRT18P25  | 4 | 39698436 | 5 | 1.271123 |
| rs6838749     | KRT18P25  | 4 | 39698436 | 1 | 0.804005 |
| rs6838749     | KRT18P25  | 4 | 39698436 | 4 | 0.768507 |
| rs7686844     | KRT18P25  | 4 | 39698906 | 5 | 1.240286 |
| rs7686844     | KRT18P25  | 4 | 39698906 | 4 | 0.478447 |
| rs7686844     | KRT18P25  | 4 | 39698906 | 7 | 1.461608 |
| rs7686844     | KRT18P25  | 4 | 39698906 | 1 | 1.499923 |
| rs794001      | N4BP2     | 4 | 39797957 | 4 | 0.566894 |
| rs794001      | N4BP2     | 4 | 39797957 | 3 | 0.618864 |
| SNP4-39800185 | N4BP2     | 4 | 39800185 | 7 | 1.648602 |
| rs2245466     | RHOH      | 4 | 39875241 | 2 | 4.811661 |

|               |           |   |          |   |          |
|---------------|-----------|---|----------|---|----------|
| rs10022491    | CHRNA9    | 4 | 40032665 | 4 | 0.184792 |
| rs10009228    | CHRNA9    | 4 | 40051179 | 6 | 0.137456 |
| rs2261167     | NSUN7     | 4 | 40505504 | 4 | 3.533249 |
| rs9993759     | LOC728136 | 4 | 41578240 | 2 | 0.070332 |
| rs2660320     | WDR21B    | 4 | 41678875 | 6 | 1.950894 |
| rs2660320     | WDR21B    | 4 | 41678875 | 4 | 0.533667 |
| rs2660332     | WDR21B    | 4 | 41679858 | 8 | 1.584689 |
| rs2660332     | WDR21B    | 4 | 41679858 | 4 | 2.479515 |
| rs2581439     | WDR21B    | 4 | 41681614 | 4 | 0.033235 |
| rs13143747    | KCTD8     | 4 | 43871717 | 7 | 0.946546 |
| rs13143747    | KCTD8     | 4 | 43871717 | 5 | 5.476316 |
| rs12374299    | GABRG1    | 4 | 45733502 | 3 | 0.141612 |
| rs12374299    | GABRG1    | 4 | 45733502 | 7 | 0.59726  |
| rs976156      | GABRG1    | 4 | 45780817 | 3 | 0.483007 |
| rs6447517     | GABRA4    | 4 | 46623503 | 3 | 0.200245 |
| rs7660336     | GABRA4    | 4 | 46624425 | 4 | 0.070118 |
| SNP4-47209442 | ATP10D    | 4 | 47209442 | 3 | 0.28685  |
| SNP4-47209442 | ATP10D    | 4 | 47209442 | 6 | 0.598358 |
| SNP4-47209442 | ATP10D    | 4 | 47209442 | 4 | 0.871968 |
| SNP4-47209442 | ATP10D    | 4 | 47209442 | 1 | 4.987812 |
| SNP4-47209442 | ATP10D    | 4 | 47209442 | 7 | 0.457697 |
| SNP4-47254759 | ATP10D    | 4 | 47254759 | 2 | 0.13934  |
| SNP4-47254759 | ATP10D    | 4 | 47254759 | 1 | 0.200088 |
| SNP4-47254759 | ATP10D    | 4 | 47254759 | 4 | 0.393125 |
| SNP4-47254759 | ATP10D    | 4 | 47254759 | 6 | 0.350528 |
| rs16851681    | ATP10D    | 4 | 47273728 | 4 | 0.524152 |
| rs16851681    | ATP10D    | 4 | 47273728 | 7 | 1.245806 |
| rs16851681    | ATP10D    | 4 | 47273728 | 3 | 0.853623 |
| rs1316874     | ATP10D    | 4 | 47283960 | 5 | 0.107149 |
| rs1316874     | ATP10D    | 4 | 47283960 | 3 | 0.463139 |
| rs1316874     | ATP10D    | 4 | 47283960 | 6 | 1.446227 |
| rs4695253     | CORIN     | 4 | 47291389 | 6 | 0.091103 |
| rs4695253     | CORIN     | 4 | 47291389 | 4 | 0.16565  |
| rs4695253     | CORIN     | 4 | 47291389 | 3 | 0.085272 |
| rs12641823    | CORIN     | 4 | 47291465 | 3 | 0.428381 |
| rs12641823    | CORIN     | 4 | 47291465 | 6 | 0.462522 |
| rs12641823    | CORIN     | 4 | 47291465 | 4 | 0.177898 |
| rs12641823    | CORIN     | 4 | 47291465 | 5 | 0.341265 |
| rs3749585     | CORIN     | 4 | 47292347 | 4 | 0.497217 |
| rs3749585     | CORIN     | 4 | 47292347 | 3 | 1.356089 |
| rs3749585     | CORIN     | 4 | 47292347 | 5 | 0.737668 |
| rs3749585     | CORIN     | 4 | 47292347 | 6 | 0.736349 |
| rs3749584     | CORIN     | 4 | 47292411 | 8 | 0.228444 |
| rs3749584     | CORIN     | 4 | 47292411 | 7 | 0.381137 |
| rs2289433     | CORIN     | 4 | 47534686 | 2 | 1.049062 |
| rs2289433     | CORIN     | 4 | 47534686 | 8 | 2.170402 |
| rs2289433     | CORIN     | 4 | 47534686 | 1 | 1.483871 |

|               |           |   |          |   |          |
|---------------|-----------|---|----------|---|----------|
| rs28642966    | CNGA1     | 4 | 47640052 | 7 | 0.69631  |
| rs28642966    | CNGA1     | 4 | 47640052 | 3 | 1.065111 |
| rs28642966    | CNGA1     | 4 | 47640052 | 4 | 0.081784 |
| rs10938519    | NPAL1     | 4 | 47733341 | 1 | 4.739385 |
| rs1507924     | TXK       | 4 | 47764044 | 4 | 3.438313 |
| rs9996527     | TXK       | 4 | 47764453 | 4 | 0.692004 |
| rs9996527     | TXK       | 4 | 47764453 | 3 | 0.926821 |
| SNP4-47776852 | TXK       | 4 | 47776852 | 2 | 3.453725 |
| rs7658300     | TXK       | 4 | 47810021 | 7 | 0.452858 |
| rs7658300     | TXK       | 4 | 47810021 | 3 | 0.802325 |
| rs7658300     | TXK       | 4 | 47810021 | 4 | 1.065002 |
| rs7658300     | TXK       | 4 | 47810021 | 2 | 4.292982 |
| rs3805184     | TEC       | 4 | 47832992 | 4 | 1.915156 |
| rs3805184     | TEC       | 4 | 47832992 | 8 | 0.416513 |
| rs3805184     | TEC       | 4 | 47832992 | 1 | 5.392638 |
| rs17574371    | TEC       | 4 | 47842066 | 7 | 0.102846 |
| rs17574371    | TEC       | 4 | 47842066 | 3 | 0.932284 |
| rs3811759     | SLC10A4   | 4 | 48185767 | 6 | 0.026551 |
| rs3811759     | SLC10A4   | 4 | 48185767 | 5 | 0.183788 |
| rs3811759     | SLC10A4   | 4 | 48185767 | 3 | 1.694327 |
| rs17472127    | ZAR1      | 4 | 48191125 | 3 | 0.03302  |
| rs17472127    | ZAR1      | 4 | 48191125 | 5 | 0.073181 |
| rs3747690     | FLJ21511  | 4 | 48683207 | 2 | 2.623663 |
| rs3747690     | FLJ21511  | 4 | 48683207 | 5 | 0.036782 |
| rs13531       | DCUN1D4   | 4 | 52474805 | 3 | 0.154681 |
| rs13531       | DCUN1D4   | 4 | 52474805 | 7 | 3.97095  |
| rs13531       | DCUN1D4   | 4 | 52474805 | 6 | 0.490245 |
| rs13531       | DCUN1D4   | 4 | 52474805 | 4 | 0.184091 |
| rs13531       | DCUN1D4   | 4 | 52474805 | 2 | 1.008232 |
| rs1519588     | LOC339977 | 4 | 52554913 | 3 | 0.723941 |
| rs1519588     | LOC339977 | 4 | 52554913 | 7 | 1.296437 |
| rs1519588     | LOC339977 | 4 | 52554913 | 6 | 1.066525 |
| rs170424      | SGCB      | 4 | 52582783 | 7 | 0.655335 |
| rs170424      | SGCB      | 4 | 52582783 | 3 | 0.823094 |
| rs6835977     | SCFD2     | 4 | 53434429 | 6 | 3.243251 |
| rs1351514     | SCFD2     | 4 | 53926867 | 1 | 5.455132 |
| rs1351514     | SCFD2     | 4 | 53926867 | 3 | 0.496431 |
| rs1014056     | LNX1      | 4 | 54020747 | 3 | 0.448384 |
| rs1014056     | LNX1      | 4 | 54020747 | 1 | 3.822842 |
| rs17084051    | LOC442108 | 4 | 54782338 | 3 | 0.727918 |
| SNP4-54834528 | PDGFRA    | 4 | 54834528 | 8 | 7.238384 |
| SNP4-54834528 | PDGFRA    | 4 | 54834528 | 3 | 0.181636 |
| rs2228230     | PDGFRA    | 4 | 54846797 | 8 | 6.93805  |
| rs2228230     | PDGFRA    | 4 | 54846797 | 3 | 0.745756 |
| rs2228230     | PDGFRA    | 4 | 54846797 | 5 | 6.248804 |
| rs1870377     | KDR       | 4 | 55667731 | 7 | 7.020934 |
| rs1870377     | KDR       | 4 | 55667731 | 1 | 5.442348 |

|               |           |   |          |   |          |
|---------------|-----------|---|----------|---|----------|
| rs576732      | SRD5A3    | 4 | 55931894 | 4 | 0.042859 |
| rs576732      | SRD5A3    | 4 | 55931894 | 2 | 5.485568 |
| rs576732      | SRD5A3    | 4 | 55931894 | 8 | 0.257855 |
| rs11658       | EXOC1     | 4 | 56465846 | 5 | 0.457965 |
| SNP4-56515169 | CEP135    | 4 | 56515169 | 2 | 3.315588 |
| SNP4-56906109 | AASDH     | 4 | 56906109 | 5 | 9.507191 |
| SNP4-56906109 | AASDH     | 4 | 56906109 | 2 | 7.084802 |
| SNP4-56906109 | AASDH     | 4 | 56906109 | 8 | 5.603352 |
| SNP4-56943473 | AASDH     | 4 | 56943473 | 8 | 1.413675 |
| rs2030364     | LOC644196 | 4 | 56980666 | 5 | 0.428251 |
| rs2030364     | LOC644196 | 4 | 56980666 | 2 | 2.701994 |
| rs3822001     | PPAT      | 4 | 56996507 | 5 | 0.04921  |
| rs3822001     | PPAT      | 4 | 56996507 | 2 | 2.162093 |
| rs3822001     | PPAT      | 4 | 56996507 | 8 | 1.517087 |
| rs17086879    | SRP72     | 4 | 57051345 | 8 | 2.206086 |
| rs34419325    | SRP72     | 4 | 57056310 | 4 | 0.586781 |
| rs4429779     | HOPX      | 4 | 57217403 | 8 | 1.241224 |
| rs4429779     | HOPX      | 4 | 57217403 | 6 | 0.286017 |
| rs3796529     | REST      | 4 | 57492171 | 7 | 0.143909 |
| rs3796529     | REST      | 4 | 57492171 | 3 | 0.262567 |
| rs6821028     | NULL      | 4 | 61976044 | 8 | 4.414548 |
| rs6821028     | NULL      | 4 | 61976044 | 6 | 0.17471  |
| rs6821028     | NULL      | 4 | 61976044 | 5 | 0.212836 |
| rs6821028     | NULL      | 4 | 61976044 | 4 | 0.911158 |
| rs7692496     | CENPC1    | 4 | 68020604 | 5 | 0.195332 |
| rs7692496     | CENPC1    | 4 | 68020604 | 8 | 1.416817 |
| rs7692496     | CENPC1    | 4 | 68020604 | 7 | 0.336293 |
| rs1056787     | CENPC1    | 4 | 68062665 | 1 | 6.17804  |
| rs13149974    | STAP1     | 4 | 68125563 | 4 | 0.090211 |
| rs1054593     | STAP1     | 4 | 68155023 | 5 | 0.497997 |
| rs1054593     | STAP1     | 4 | 68155023 | 6 | 1.165368 |
| rs1038426     | GNRHR     | 4 | 68286130 | 4 | 1.248196 |
| rs1038426     | GNRHR     | 4 | 68286130 | 3 | 0.831931 |
| rs1038426     | GNRHR     | 4 | 68286130 | 1 | 4.155088 |
| rs1038427     | GNRHR     | 4 | 68286297 | 3 | 1.220734 |
| rs1038427     | GNRHR     | 4 | 68286297 | 1 | 3.894779 |
| rs1038427     | GNRHR     | 4 | 68286297 | 4 | 0.407335 |
| rs1038427     | GNRHR     | 4 | 68286297 | 7 | 1.508104 |
| rs13150734    | GNRHR     | 4 | 68287533 | 3 | 1.068774 |
| rs13150734    | GNRHR     | 4 | 68287533 | 4 | 0.28531  |
| rs13150734    | GNRHR     | 4 | 68287533 | 1 | 4.387529 |
| rs17635850    | GNRHR     | 4 | 68287964 | 3 | 0.149626 |
| rs17635850    | GNRHR     | 4 | 68287964 | 1 | 3.786172 |
| rs4986942     | GNRHR     | 4 | 68302196 | 1 | 5.716357 |
| rs2062302     | GNRHR     | 4 | 68303903 | 3 | 0.358936 |
| rs2062302     | GNRHR     | 4 | 68303903 | 4 | 0.689054 |
| rs2062301     | GNRHR     | 4 | 68303927 | 3 | 0.342799 |

|               |           |   |          |   |          |
|---------------|-----------|---|----------|---|----------|
| rs2062301     | GNRHR     | 4 | 68303927 | 4 | 7.262434 |
| rs2062301     | GNRHR     | 4 | 68303927 | 7 | 1.861568 |
| rs13138607    | GNRHR     | 4 | 68304145 | 3 | 0.044069 |
| rs13138607    | GNRHR     | 4 | 68304145 | 4 | 0.377518 |
| rs353163      | TMPRSS11A | 4 | 68467369 | 3 | 1.312803 |
| rs353163      | TMPRSS11A | 4 | 68467369 | 1 | 1.607219 |
| rs1370840     | TMPRSS11A | 4 | 68492841 | 4 | 0.078681 |
| rs1438444     | TMPRSS11F | 4 | 68601691 | 4 | 4.670597 |
| rs10018943    | TMPRSS11F | 4 | 68602212 | 4 | 0.351493 |
| rs3819257     | SYT14L    | 4 | 68611132 | 4 | 0.511543 |
| rs2319797     | TMPRSS11B | 4 | 68777102 | 4 | 0.767138 |
| rs1715081     | YTHDC1    | 4 | 68859393 | 7 | 2.03442  |
| rs1715081     | YTHDC1    | 4 | 68859393 | 4 | 5.171979 |
| rs10033058    | YTHDC1    | 4 | 68860003 | 7 | 1.076686 |
| rs10033058    | YTHDC1    | 4 | 68860003 | 4 | 1.281169 |
| rs10033058    | YTHDC1    | 4 | 68860003 | 6 | 1.955369 |
| rs3100        | UGT2B15   | 4 | 69547273 | 1 | 2.051717 |
| rs2018024     | LOC642381 | 4 | 69897507 | 7 | 2.750087 |
| rs2018024     | LOC642381 | 4 | 69897507 | 8 | 3.27375  |
| rs2292092     | SULT1B1   | 4 | 70627379 | 2 | 0.552354 |
| rs2292092     | SULT1B1   | 4 | 70627379 | 3 | 0.949244 |
| rs2292092     | SULT1B1   | 4 | 70627379 | 1 | 0.394143 |
| SNP4-71058688 | C4orf40   | 4 | 71058688 | 4 | 3.076363 |
| SNP4-71058688 | C4orf40   | 4 | 71058688 | 5 | 3.137709 |
| rs3196714     | ODAM      | 4 | 71103078 | 5 | 1.023451 |
| rs777793      | C4orf7    | 4 | 71135522 | 3 | 0.368562 |
| rs777793      | C4orf7    | 4 | 71135522 | 4 | 0.095175 |
| rs777793      | C4orf7    | 4 | 71135522 | 6 | 1.418613 |
| SNP4-71266977 | SMR3A     | 4 | 71266977 | 5 | 1.896058 |
| SNP4-71266977 | SMR3A     | 4 | 71266977 | 4 | 3.681294 |
| SNP4-71266977 | SMR3A     | 4 | 71266977 | 6 | 3.54478  |
| SNP4-71266977 | SMR3A     | 4 | 71266977 | 3 | 3.035755 |
| rs3733493     | SMR3B     | 4 | 71290356 | 3 | 1.539795 |
| rs3733493     | SMR3B     | 4 | 71290356 | 6 | 4.447145 |
| rs3733493     | SMR3B     | 4 | 71290356 | 4 | 3.746119 |
| rs2306948     | MUC7      | 4 | 71374317 | 6 | 1.83292  |
| rs2306948     | MUC7      | 4 | 71374317 | 4 | 1.346097 |
| rs6826961     | MUC7      | 4 | 71381290 | 6 | 1.875812 |
| rs6826961     | MUC7      | 4 | 71381290 | 4 | 2.591261 |
| rs3733491     | MUC7      | 4 | 71382443 | 6 | 2.694254 |
| rs7660807     | AMTN      | 4 | 71423140 | 5 | 0.030805 |
| rs7660807     | AMTN      | 4 | 71423140 | 7 | 0.091024 |
| rs17676820    | AMTN      | 4 | 71431578 | 3 | 0.37441  |
| rs17676820    | AMTN      | 4 | 71431578 | 4 | 0.413074 |
| rs35266919    | AMBN      | 4 | 71503574 | 1 | 0.533921 |
| rs35266919    | AMBN      | 4 | 71503574 | 3 | 0.24299  |
| rs3733488     | UTP3      | 4 | 71773139 | 2 | 4.339859 |

|               |               |   |          |   |          |
|---------------|---------------|---|----------|---|----------|
| rs6836323     | MOBKL1A       | 4 | 72070540 | 5 | 6.433622 |
| rs1043218     | SLC4A4        | 4 | 72655099 | 2 | 0.921448 |
| rs788908      | ADAMTS3       | 4 | 73633150 | 6 | 0.014955 |
| rs788908      | ADAMTS3       | 4 | 73633150 | 5 | 0.274688 |
| rs788908      | ADAMTS3       | 4 | 73633150 | 4 | 1.42854  |
| rs1052080     | COX18         | 4 | 74139486 | 6 | 1.732683 |
| rs1052080     | COX18         | 4 | 74139486 | 7 | 4.261914 |
| rs1052080     | COX18         | 4 | 74139486 | 8 | 4.627883 |
| rs1052080     | COX18         | 4 | 74139486 | 3 | 0.900694 |
| rs2367288     | LOC728045     | 4 | 74932962 | 3 | 1.12165  |
| rs2367288     | LOC728045     | 4 | 74932962 | 1 | 0.957861 |
| rs2367288     | LOC728045     | 4 | 74932962 | 7 | 0.88875  |
| SNP4-74939062 | PF4V1         | 4 | 74939062 | 5 | 0.938338 |
| rs352047      | CXCL5         | 4 | 75080954 | 2 | 0.57421  |
| rs425535      | CXCL5         | 4 | 75082861 | 2 | 4.890036 |
| rs16850883    | MTHFD2L       | 4 | 75387649 | 5 | 0.131331 |
| rs16850883    | MTHFD2L       | 4 | 75387649 | 4 | 4.886672 |
| rs16850883    | MTHFD2L       | 4 | 75387649 | 3 | 1.028456 |
| rs16850883    | MTHFD2L       | 4 | 75387649 | 6 | 5.032118 |
| rs1017733     | EREG          | 4 | 75471214 | 4 | 0.319983 |
| rs1017733     | EREG          | 4 | 75471214 | 8 | 0.696809 |
| rs1017733     | EREG          | 4 | 75471214 | 1 | 4.733044 |
| SNP4-75938541 | BTC           | 4 | 75938541 | 6 | 0.420731 |
| rs9090        | DKFZP564O0823 | 4 | 76191437 | 2 | 5.868749 |
| rs890289      | DKFZP564O0823 | 4 | 76192056 | 2 | 4.085356 |
| rs1043633     | DKFZP564O0823 | 4 | 76192854 | 2 | 4.677611 |
| rs2306175     | C4orf26       | 4 | 76708369 | 1 | 4.642688 |
| rs2306175     | C4orf26       | 4 | 76708369 | 3 | 0.782471 |
| rs2306174     | C4orf26       | 4 | 76708606 | 1 | 2.208897 |
| rs41282391    | USO1          | 4 | 76949225 | 3 | 1.211123 |
| rs2242470     | SDAD1         | 4 | 77097712 | 3 | 1.631035 |
| rs2242470     | SDAD1         | 4 | 77097712 | 6 | 0.985167 |
| rs9994667     | CXCL11        | 4 | 77174272 | 3 | 1.085586 |
| rs1128864     | ART3          | 4 | 77252614 | 3 | 0.03525  |
| rs17001890    | FLJ25770      | 4 | 77524370 | 4 | 0.121838 |
| rs17001890    | FLJ25770      | 4 | 77524370 | 3 | 1.227872 |
| SNP4-77850449 | SHROOM3       | 4 | 77850449 | 3 | 0.099568 |
| SNP4-77850449 | SHROOM3       | 4 | 77850449 | 4 | 3.448998 |
| rs344140      | SHROOM3       | 4 | 77879186 | 7 | 0.462928 |
| rs344140      | SHROOM3       | 4 | 77879186 | 2 | 0.330676 |
| rs344140      | SHROOM3       | 4 | 77879186 | 4 | 0.412816 |
| rs344140      | SHROOM3       | 4 | 77879186 | 1 | 0.41302  |
| rs344140      | SHROOM3       | 4 | 77879186 | 6 | 0.081739 |
| rs344141      | SHROOM3       | 4 | 77879755 | 1 | 0.684508 |
| rs344141      | SHROOM3       | 4 | 77879755 | 3 | 0.203802 |
| rs2703130     | ANKRD56       | 4 | 78036898 | 4 | 0.215714 |
| rs873090      | 11-Sep        | 4 | 78090040 | 2 | 5.480876 |

|            |        |   |          |   |          |
|------------|--------|---|----------|---|----------|
| rs873090   | 11-Sep | 4 | 78090040 | 5 | 0.286923 |
| rs873090   | 11-Sep | 4 | 78090040 | 8 | 2.646248 |
| rs873090   | 11-Sep | 4 | 78090040 | 4 | 2.808742 |
| rs4150050  | CCNG2  | 4 | 78298719 | 1 | 6.395894 |
| rs4150052  | CCNG2  | 4 | 78298796 | 7 | 0.295034 |
| rs1052563  | CXCL13 | 4 | 78751256 | 5 | 0.405411 |
| rs28695846 | MRPL1  | 4 | 79003037 | 1 | 3.121064 |
| rs12504081 | FRAS1  | 4 | 79424723 | 5 | 0.015644 |
| rs12504081 | FRAS1  | 4 | 79424723 | 7 | 5.219971 |
| rs12504081 | FRAS1  | 4 | 79424723 | 2 | 4.877759 |
| rs12504081 | FRAS1  | 4 | 79424723 | 3 | 0.912422 |
| rs12504081 | FRAS1  | 4 | 79424723 | 8 | 0.218169 |
| rs12504081 | FRAS1  | 4 | 79424723 | 1 | 0.489602 |
| rs345514   | FRAS1  | 4 | 79457673 | 2 | 2.399716 |
| rs345514   | FRAS1  | 4 | 79457673 | 6 | 0.598163 |
| rs6851427  | FRAS1  | 4 | 79604743 | 1 | 3.831971 |
| rs6851427  | FRAS1  | 4 | 79604743 | 8 | 0.456092 |
| rs6851427  | FRAS1  | 4 | 79604743 | 7 | 0.646423 |
| rs11098194 | FRAS1  | 4 | 79619892 | 7 | 0.510486 |
| rs11098194 | FRAS1  | 4 | 79619892 | 8 | 0.803885 |
| rs11098194 | FRAS1  | 4 | 79619892 | 1 | 4.553622 |
| rs3749487  | FRAS1  | 4 | 79656179 | 6 | 4.813376 |
| rs3749487  | FRAS1  | 4 | 79656179 | 2 | 5.68065  |
| rs931605   | FRAS1  | 4 | 79662861 | 4 | 0.159172 |
| rs931605   | FRAS1  | 4 | 79662861 | 1 | 6.306343 |
| rs931605   | FRAS1  | 4 | 79662861 | 7 | 0.554144 |
| rs3749485  | FRAS1  | 4 | 79681584 | 1 | 4.839793 |
| rs3749485  | FRAS1  | 4 | 79681584 | 7 | 0.01947  |
| rs3749485  | FRAS1  | 4 | 79681584 | 6 | 0.098685 |
| rs1564458  | PAQR3  | 4 | 80059980 | 2 | 3.816837 |
| rs13140055 | ANTXR2 | 4 | 81212820 | 6 | 0.053874 |
| rs13140055 | ANTXR2 | 4 | 81212820 | 7 | 0.611138 |
| rs13140055 | ANTXR2 | 4 | 81212820 | 1 | 1.726744 |
| rs11557908 | ANTXR2 | 4 | 81213057 | 4 | 1.345744 |
| rs11557908 | ANTXR2 | 4 | 81213057 | 1 | 3.395713 |
| rs11557908 | ANTXR2 | 4 | 81213057 | 7 | 0.193693 |
| rs2292842  | PRDM8  | 4 | 81344005 | 2 | 1.029968 |
| rs2292842  | PRDM8  | 4 | 81344005 | 7 | 0.529555 |
| rs2288338  | HNRPD  | 4 | 83493658 | 8 | 0.263751 |
| rs2288338  | HNRPD  | 4 | 83493658 | 4 | 0.568205 |
| GA004127   | HNRPDL | 4 | 83569978 | 8 | 0.891939 |
| rs3733227  | SCD5   | 4 | 83801235 | 1 | 6.356442 |
| rs3733227  | SCD5   | 4 | 83801235 | 6 | 3.695817 |
| rs3733227  | SCD5   | 4 | 83801235 | 5 | 0.706101 |
| rs3733227  | SCD5   | 4 | 83801235 | 7 | 0.482539 |
| rs6830422  | LIN54  | 4 | 84067989 | 6 | 1.311453 |
| rs6830422  | LIN54  | 4 | 84067989 | 1 | 0.15602  |

|               |           |   |          |   |          |
|---------------|-----------|---|----------|---|----------|
| rs4396979     | LOC391674 | 4 | 84387677 | 1 | 2.925052 |
| rs4396979     | LOC391674 | 4 | 84387677 | 6 | 0.230469 |
| rs4396979     | LOC391674 | 4 | 84387677 | 3 | 0.503599 |
| rs348700      | LOC152845 | 4 | 85385044 | 4 | 0.829675 |
| rs348700      | LOC152845 | 4 | 85385044 | 7 | 4.815823 |
| rs348700      | LOC152845 | 4 | 85385044 | 8 | 2.314893 |
| rs348700      | LOC152845 | 4 | 85385044 | 2 | 0.755191 |
| rs7681742     | WDFY3     | 4 | 85949776 | 7 | 4.752056 |
| rs346498      | ARHGAP24  | 4 | 87070584 | 2 | 3.088851 |
| rs346498      | ARHGAP24  | 4 | 87070584 | 3 | 0.843359 |
| rs346498      | ARHGAP24  | 4 | 87070584 | 7 | 1.104857 |
| rs934648      | ARHGAP24  | 4 | 87142476 | 4 | 1.485087 |
| rs934648      | ARHGAP24  | 4 | 87142476 | 3 | 0.558649 |
| rs958         | MAPK10    | 4 | 87156898 | 8 | 3.736844 |
| rs958         | MAPK10    | 4 | 87156898 | 7 | 0.914028 |
| rs958         | MAPK10    | 4 | 87156898 | 1 | 2.531806 |
| rs958         | MAPK10    | 4 | 87156898 | 2 | 0.786017 |
| rs13106574    | SLC10A6   | 4 | 87988953 | 1 | 1.383316 |
| rs13106574    | SLC10A6   | 4 | 87988953 | 4 | 1.024505 |
| rs13106574    | SLC10A6   | 4 | 87988953 | 7 | 0.246714 |
| SNP4-88028044 | C4orf36   | 4 | 88028044 | 3 | 0.336996 |
| rs340638      | AFF1      | 4 | 88147228 | 6 | 0.84537  |
| rs340638      | AFF1      | 4 | 88147228 | 8 | 3.806259 |
| rs6531985     | HSD17B11  | 4 | 88512911 | 2 | 1.188885 |
| rs6531985     | HSD17B11  | 4 | 88512911 | 1 | 0.16185  |
| rs6531985     | HSD17B11  | 4 | 88512911 | 5 | 1.428801 |
| rs6531985     | HSD17B11  | 4 | 88512911 | 4 | 0.819672 |
| rs9933        | SPARCL1   | 4 | 88620640 | 2 | 3.100423 |
| rs9933        | SPARCL1   | 4 | 88620640 | 5 | 0.181813 |
| rs9933        | SPARCL1   | 4 | 88620640 | 3 | 0.29799  |
| rs8342        | SPARCL1   | 4 | 88635247 | 2 | 0.767959 |
| rs8342        | SPARCL1   | 4 | 88635247 | 5 | 0.273513 |
| rs8342        | SPARCL1   | 4 | 88635247 | 3 | 0.396309 |
| rs1049539     | SPARCL1   | 4 | 88669372 | 1 | 3.088839 |
| rs1049539     | SPARCL1   | 4 | 88669372 | 4 | 0.764997 |
| rs10019009    | DMP1      | 4 | 88802159 | 8 | 4.431502 |
| rs13144371    | IBSP      | 4 | 88951770 | 1 | 0.589814 |
| rs13144371    | IBSP      | 4 | 88951770 | 2 | 0.135318 |
| rs2231135     | ABCG2     | 4 | 89299018 | 3 | 1.615724 |
| rs3177413     | PIGY      | 4 | 89662185 | 6 | 1.020857 |
| rs3737488     | HERC3     | 4 | 89826928 | 6 | 0.041191 |
| rs7698491     | HERC3     | 4 | 89826955 | 1 | 3.122085 |
| rs2602122     | NAP1L5    | 4 | 89836464 | 4 | 3.097175 |
| rs28435799    | NAP1L5    | 4 | 89836954 | 1 | 4.351567 |
| rs1059122     | FAM13A1   | 4 | 89866447 | 4 | 6.429021 |
| rs1059122     | FAM13A1   | 4 | 89866447 | 1 | 3.761986 |
| rs1059122     | FAM13A1   | 4 | 89866447 | 7 | 5.803758 |



|            |           |   |           |   |          |
|------------|-----------|---|-----------|---|----------|
| rs1059122  | FAM13A1   | 4 | 89866447  | 6 | 0.106932 |
| rs1801915  | FAM13A1   | 4 | 89872280  | 6 | 3.608048 |
| rs7657817  | FAM13A1   | 4 | 89887882  | 4 | 4.541724 |
| rs7657817  | FAM13A1   | 4 | 89887882  | 6 | 0.402505 |
| rs1431550  | GPRIN3    | 4 | 90387438  | 5 | 0.879492 |
| rs1431550  | GPRIN3    | 4 | 90387438  | 6 | 5.149186 |
| rs1431550  | GPRIN3    | 4 | 90387438  | 4 | 0.086861 |
| rs1431550  | GPRIN3    | 4 | 90387438  | 3 | 0.229379 |
| rs1431550  | GPRIN3    | 4 | 90387438  | 8 | 4.933198 |
| rs1442138  | MMRN1     | 4 | 91035317  | 1 | 2.887059 |
| rs1442138  | MMRN1     | 4 | 91035317  | 8 | 3.045407 |
| rs11730314 | MGC48628  | 4 | 91921845  | 4 | 0.10346  |
| rs11730314 | MGC48628  | 4 | 91921845  | 1 | 0.39881  |
| rs7653977  | LOC728394 | 4 | 92459301  | 3 | 0.496761 |
| rs7653977  | LOC728394 | 4 | 92459301  | 5 | 0.343108 |
| rs7653977  | LOC728394 | 4 | 92459301  | 1 | 0.182765 |
| rs7653977  | LOC728394 | 4 | 92459301  | 6 | 0.694894 |
| rs6532289  | LOC728394 | 4 | 92459825  | 5 | 4.276252 |
| rs6532289  | LOC728394 | 4 | 92459825  | 1 | 0.502759 |
| rs6532289  | LOC728394 | 4 | 92459825  | 6 | 4.142383 |
| rs6532289  | LOC728394 | 4 | 92459825  | 3 | 0.564429 |
| rs6532289  | LOC728394 | 4 | 92459825  | 2 | 0.21862  |
| rs12642449 | PDLIM5    | 4 | 95727778  | 3 | 0.554978 |
| rs12642449 | PDLIM5    | 4 | 95727778  | 8 | 3.789259 |
| rs1043853  | PDLIM5    | 4 | 95807297  | 3 | 0.604258 |
| rs35120448 | UNC5C     | 4 | 96385293  | 1 | 2.918957 |
| rs783960   | C4orf37   | 4 | 99112460  | 7 | 0.589737 |
| rs783960   | C4orf37   | 4 | 99112460  | 3 | 0.264738 |
| rs783960   | C4orf37   | 4 | 99112460  | 6 | 2.598178 |
| rs783960   | C4orf37   | 4 | 99112460  | 4 | 1.085287 |
| rs783959   | C4orf37   | 4 | 99112499  | 6 | 2.611521 |
| rs783959   | C4orf37   | 4 | 99112499  | 3 | 0.298108 |
| rs783959   | C4orf37   | 4 | 99112499  | 4 | 0.429867 |
| rs783959   | C4orf37   | 4 | 99112499  | 7 | 0.49575  |
| rs17558193 | C4orf37   | 4 | 99268616  | 6 | 0.395908 |
| rs17558193 | C4orf37   | 4 | 99268616  | 7 | 1.032399 |
| rs17558193 | C4orf37   | 4 | 99268616  | 3 | 0.995985 |
| rs17558193 | C4orf37   | 4 | 99268616  | 4 | 1.663835 |
| rs4699605  | C4orf37   | 4 | 99283402  | 4 | 1.439526 |
| rs4699605  | C4orf37   | 4 | 99283402  | 7 | 1.742566 |
| rs4699605  | C4orf37   | 4 | 99283402  | 6 | 0.6553   |
| rs4699605  | C4orf37   | 4 | 99283402  | 2 | 4.402594 |
| rs4699605  | C4orf37   | 4 | 99283402  | 3 | 0.493027 |
| rs6810489  | LOC728710 | 4 | 100096468 | 2 | 0.044224 |
| rs6810489  | LOC728710 | 4 | 100096468 | 5 | 1.320829 |
| rs6810489  | LOC728710 | 4 | 100096468 | 7 | 0.845669 |
| rs6810489  | LOC728710 | 4 | 100096468 | 4 | 0.451778 |

|            |           |   |           |   |          |
|------------|-----------|---|-----------|---|----------|
| rs6810489  | LOC728710 | 4 | 100096468 | 6 | 0.185051 |
| rs1042365  | ADH4      | 4 | 100264523 | 5 | 0.121884 |
| rs1042365  | ADH4      | 4 | 100264523 | 1 | 0.296246 |
| rs1042364  | ADH4      | 4 | 100264597 | 6 | 1.704714 |
| rs1042364  | ADH4      | 4 | 100264597 | 5 | 0.594509 |
| rs1042364  | ADH4      | 4 | 100264597 | 1 | 0.900922 |
| rs1126673  | ADH4      | 4 | 100264639 | 1 | 1.747851 |
| rs1126673  | ADH4      | 4 | 100264639 | 6 | 0.329776 |
| rs1126673  | ADH4      | 4 | 100264639 | 4 | 1.375817 |
| rs1126673  | ADH4      | 4 | 100264639 | 2 | 0.789073 |
| rs1126672  | ADH4      | 4 | 100266835 | 4 | 2.541975 |
| rs1126672  | ADH4      | 4 | 100266835 | 1 | 0.11302  |
| rs1126672  | ADH4      | 4 | 100266835 | 2 | 0.414581 |
| rs1126672  | ADH4      | 4 | 100266835 | 5 | 1.271755 |
| rs1126672  | ADH4      | 4 | 100266835 | 6 | 0.281386 |
| rs1126671  | ADH4      | 4 | 100267437 | 1 | 0.629355 |
| rs1126671  | ADH4      | 4 | 100267437 | 4 | 0.286602 |
| rs1126671  | ADH4      | 4 | 100267437 | 6 | 1.144378 |
| rs1126670  | ADH4      | 4 | 100271756 | 6 | 2.685507 |
| rs1126670  | ADH4      | 4 | 100271756 | 4 | 1.534675 |
| rs1126670  | ADH4      | 4 | 100271756 | 1 | 1.61522  |
| rs1126670  | ADH4      | 4 | 100271756 | 2 | 0.08004  |
| rs2032349  | ADH4      | 4 | 100281842 | 5 | 0.751278 |
| rs698      | ADH1C     | 4 | 100479812 | 3 | 0.21057  |
| rs698      | ADH1C     | 4 | 100479812 | 4 | 1.854268 |
| rs698      | ADH1C     | 4 | 100479812 | 2 | 4.507829 |
| rs284787   | ADH7      | 4 | 100552579 | 5 | 3.000805 |
| rs894369   | ADH7      | 4 | 100552869 | 4 | 1.518048 |
| rs894369   | ADH7      | 4 | 100552869 | 1 | 2.65665  |
| rs3805331  | ADH7      | 4 | 100552955 | 7 | 2.360265 |
| rs284786   | ADH7      | 4 | 100553000 | 5 | 0.472    |
| rs4147554  | ADH7      | 4 | 100553089 | 7 | 0.390053 |
| rs971074   | ADH7      | 4 | 100560884 | 1 | 6.246482 |
| rs971074   | ADH7      | 4 | 100560884 | 5 | 1.633431 |
| rs13143848 | C4orf17   | 4 | 100662743 | 8 | 0.862686 |
| rs10026790 | RG9MTD2   | 4 | 100703566 | 3 | 0.867843 |
| rs10026790 | RG9MTD2   | 4 | 100703566 | 1 | 5.104751 |
| rs3816873  | MTTP      | 4 | 100723687 | 1 | 0.083115 |
| rs3816873  | MTTP      | 4 | 100723687 | 3 | 0.13315  |
| rs17599091 | MTTP      | 4 | 100731942 | 1 | 1.296164 |
| rs12641768 | LOC285556 | 4 | 100777617 | 8 | 0.289658 |
| rs4699384  | LOC285556 | 4 | 100789704 | 1 | 0.579889 |
| rs4699384  | LOC285556 | 4 | 100789704 | 8 | 0.108886 |
| rs1491242  | LOC285556 | 4 | 100790024 | 8 | 0.252908 |
| rs1491242  | LOC285556 | 4 | 100790024 | 1 | 0.410286 |
| rs715239   | DAPP1     | 4 | 100957058 | 1 | 5.857885 |
| rs715239   | DAPP1     | 4 | 100957058 | 3 | 0.293866 |

|            |           |   |           |   |          |
|------------|-----------|---|-----------|---|----------|
| rs15924    | DAPP1     | 4 | 101009330 | 6 | 6.172142 |
| rs17029673 | LOC256880 | 4 | 101091388 | 3 | 0.901615 |
| rs17029673 | LOC256880 | 4 | 101091388 | 7 | 1.265184 |
| rs17029673 | LOC256880 | 4 | 101091388 | 8 | 0.162027 |
| rs17029673 | LOC256880 | 4 | 101091388 | 2 | 3.352596 |
| rs1063821  | DDIT4L    | 4 | 101326299 | 1 | 5.826174 |
| rs1063821  | DDIT4L    | 4 | 101326299 | 7 | 0.811535 |
| rs1063821  | DDIT4L    | 4 | 101326299 | 3 | 0.189814 |
| rs2903209  | DDIT4L    | 4 | 101326315 | 3 | 0.182523 |
| rs2903209  | DDIT4L    | 4 | 101326315 | 7 | 1.552687 |
| rs2903209  | DDIT4L    | 4 | 101326315 | 2 | 2.854749 |
| rs3819185  | DDIT4L    | 4 | 101326398 | 3 | 1.154136 |
| rs3819185  | DDIT4L    | 4 | 101326398 | 7 | 2.250667 |
| rs3819184  | DDIT4L    | 4 | 101326440 | 7 | 0.021274 |
| rs3819184  | DDIT4L    | 4 | 101326440 | 2 | 3.398755 |
| rs3819184  | DDIT4L    | 4 | 101326440 | 3 | 0.271156 |
| rs3819183  | DDIT4L    | 4 | 101326499 | 2 | 4.080672 |
| rs3819183  | DDIT4L    | 4 | 101326499 | 3 | 1.105825 |
| rs3819182  | DDIT4L    | 4 | 101326687 | 3 | 0.357182 |
| rs3819182  | DDIT4L    | 4 | 101326687 | 1 | 4.055454 |
| rs17029766 | DDIT4L    | 4 | 101326825 | 6 | 0.097784 |
| rs17029766 | DDIT4L    | 4 | 101326825 | 1 | 4.205403 |
| rs17029766 | DDIT4L    | 4 | 101326825 | 5 | 3.838133 |
| rs11734827 | DDIT4L    | 4 | 101327031 | 7 | 0.355202 |
| rs11734827 | DDIT4L    | 4 | 101327031 | 3 | 0.940063 |
| rs11726613 | DDIT4L    | 4 | 101327080 | 5 | 0.392157 |
| rs11726613 | DDIT4L    | 4 | 101327080 | 2 | 2.508714 |
| rs11726613 | DDIT4L    | 4 | 101327080 | 3 | 0.550377 |
| rs11726613 | DDIT4L    | 4 | 101327080 | 8 | 0.249157 |
| rs11734833 | DDIT4L    | 4 | 101327092 | 5 | 0.020484 |
| rs11726694 | DDIT4L    | 4 | 101327155 | 2 | 5.390819 |
| rs11726694 | DDIT4L    | 4 | 101327155 | 3 | 0.987354 |
| rs11726694 | DDIT4L    | 4 | 101327155 | 5 | 0.084    |
| rs11726650 | DDIT4L    | 4 | 101327214 | 2 | 4.648564 |
| rs11726650 | DDIT4L    | 4 | 101327214 | 5 | 0.165249 |
| rs11726650 | DDIT4L    | 4 | 101327214 | 3 | 0.962562 |
| rs11726650 | DDIT4L    | 4 | 101327214 | 8 | 1.876559 |
| rs10007201 | DDIT4L    | 4 | 101327355 | 3 | 0.247386 |
| rs10007201 | DDIT4L    | 4 | 101327355 | 8 | 0.113506 |
| rs10007201 | DDIT4L    | 4 | 101327355 | 5 | 0.518526 |
| rs10007201 | DDIT4L    | 4 | 101327355 | 1 | 4.50674  |
| rs3749604  | DDIT4L    | 4 | 101328184 | 3 | 0.381061 |
| rs3749604  | DDIT4L    | 4 | 101328184 | 2 | 5.179658 |
| rs3749604  | DDIT4L    | 4 | 101328184 | 7 | 1.419386 |
| rs9990699  | LOC728771 | 4 | 101952470 | 3 | 0.786509 |
| rs9990699  | LOC728771 | 4 | 101952470 | 4 | 3.542265 |
| rs9990699  | LOC728771 | 4 | 101952470 | 1 | 0.245171 |

|            |           |   |           |   |          |
|------------|-----------|---|-----------|---|----------|
| rs10516486 | BANK1     | 4 | 102970299 | 5 | 0.819199 |
| rs10516486 | BANK1     | 4 | 102970299 | 2 | 5.038591 |
| rs10516486 | BANK1     | 4 | 102970299 | 3 | 1.793288 |
| rs3113676  | BANK1     | 4 | 103184066 | 4 | 1.084766 |
| rs6842661  | BANK1     | 4 | 103214286 | 4 | 1.168751 |
| rs6842661  | BANK1     | 4 | 103214286 | 3 | 0.529103 |
| rs223391   | UBE2D3    | 4 | 103967359 | 6 | 0.941163 |
| rs223391   | UBE2D3    | 4 | 103967359 | 8 | 2.898582 |
| rs223391   | UBE2D3    | 4 | 103967359 | 5 | 4.739416 |
| rs223391   | UBE2D3    | 4 | 103967359 | 2 | 4.704457 |
| rs3733632  | TACR3     | 4 | 104860384 | 6 | 1.232918 |
| rs4413407  | CXXC4     | 4 | 105612810 | 2 | 4.801323 |
| rs4413407  | CXXC4     | 4 | 105612810 | 4 | 0.347218 |
| rs17253672 | KIAA1546  | 4 | 106375636 | 7 | 0.265614 |
| rs7670522  | KIAA1546  | 4 | 106379814 | 3 | 0.589655 |
| rs7670522  | KIAA1546  | 4 | 106379814 | 8 | 1.200127 |
| rs13787    | PPA2      | 4 | 106536878 | 3 | 0.104444 |
| rs13787    | PPA2      | 4 | 106536878 | 1 | 6.68771  |
| rs13787    | PPA2      | 4 | 106536878 | 7 | 0.399646 |
| rs13787    | PPA2      | 4 | 106536878 | 5 | 0.277805 |
| rs3864227  | LOC402182 | 4 | 106667201 | 5 | 1.636609 |
| rs3864227  | LOC402182 | 4 | 106667201 | 7 | 1.225378 |
| rs3864227  | LOC402182 | 4 | 106667201 | 6 | 1.890276 |
| rs3864227  | LOC402182 | 4 | 106667201 | 4 | 2.12472  |
| rs4340795  | NPNT      | 4 | 107081179 | 4 | 0.377441 |
| rs4340795  | NPNT      | 4 | 107081179 | 2 | 4.762398 |
| rs4340795  | NPNT      | 4 | 107081179 | 7 | 4        |
| rs4340795  | NPNT      | 4 | 107081179 | 5 | 1.370023 |
| rs11733075 | NPNT      | 4 | 107109803 | 7 | 0.923987 |
| rs11733103 | NPNT      | 4 | 107109819 | 7 | 0.499452 |
| rs11735326 | NPNT      | 4 | 107111343 | 7 | 1.069912 |
| rs3733635  | DKK2      | 4 | 108176354 | 8 | 1.257752 |
| rs973126   | PAPSS1    | 4 | 108860749 | 1 | 3.970911 |
| rs3756271  | CYP2U1    | 4 | 109093488 | 4 | 0.099287 |
| rs3756271  | CYP2U1    | 4 | 109093488 | 5 | 3.76411  |
| rs3756271  | CYP2U1    | 4 | 109093488 | 7 | 0.632763 |
| rs3756271  | CYP2U1    | 4 | 109093488 | 6 | 2.858918 |
| rs3756271  | CYP2U1    | 4 | 109093488 | 1 | 4.65679  |
| rs3756271  | CYP2U1    | 4 | 109093488 | 3 | 0.184535 |
| rs3756271  | CYP2U1    | 4 | 109093488 | 8 | 5.529991 |
| rs4245927  | LEF1      | 4 | 109189039 | 1 | 3.096919 |
| rs4245927  | LEF1      | 4 | 109189039 | 5 | 1.038217 |
| rs7686569  | FLJ37673  | 4 | 109697228 | 5 | 1.189846 |
| rs7686569  | FLJ37673  | 4 | 109697228 | 1 | 1.752722 |
| rs7686569  | FLJ37673  | 4 | 109697228 | 4 | 0.043214 |
| rs7686569  | FLJ37673  | 4 | 109697228 | 6 | 1.200074 |
| rs3796934  | FLJ37673  | 4 | 109761110 | 1 | 0.36317  |

|                |           |   |           |   |          |
|----------------|-----------|---|-----------|---|----------|
| rs7657133      | RRH       | 4 | 110984821 | 3 | 1.703836 |
| rs6839680      | RRH       | 4 | 110984945 | 6 | 4.482305 |
| rs6839680      | RRH       | 4 | 110984945 | 5 | 0.418903 |
| rs17040904     | LRIT3     | 4 | 110992160 | 7 | 0.369773 |
| rs4698797      | LRIT3     | 4 | 110992516 | 3 | 0.302734 |
| rs4698797      | LRIT3     | 4 | 110992516 | 5 | 2.595188 |
| rs7679048      | LRIT3     | 4 | 111005739 | 3 | 0.239167 |
| rs7679048      | LRIT3     | 4 | 111005739 | 5 | 0.288071 |
| rs7679048      | LRIT3     | 4 | 111005739 | 2 | 2.667688 |
| rs2347131      | LRIT3     | 4 | 111010810 | 3 | 2.12101  |
| rs4444903      | EGF       | 4 | 111053559 | 4 | 0.880861 |
| rs11568943     | EGF       | 4 | 111102570 | 2 | 0.113311 |
| rs11568943     | EGF       | 4 | 111102570 | 3 | 8.550978 |
| rs11568943     | EGF       | 4 | 111102570 | 7 | 0.388979 |
| rs11568993     | EGF       | 4 | 111116764 | 2 | 3.662401 |
| rs11568993     | EGF       | 4 | 111116764 | 3 | 0.431802 |
| rs11569017     | EGF       | 4 | 111121560 | 7 | 5.97214  |
| rs11569017     | EGF       | 4 | 111121560 | 2 | 4.093527 |
| rs11569017     | EGF       | 4 | 111121560 | 3 | 0.145106 |
| rs4698803      | EGF       | 4 | 111133876 | 7 | 0.489766 |
| rs4698803      | EGF       | 4 | 111133876 | 4 | 0.373323 |
| rs10004479     | LOC391686 | 4 | 112085786 | 2 | 1.080264 |
| rs3203648      | TIFA      | 4 | 113417579 | 1 | 0.768347 |
| rs4834267      | LOC645237 | 4 | 113497960 | 6 | 0.032831 |
| rs4834267      | LOC645237 | 4 | 113497960 | 5 | 0.018599 |
| rs4834267      | LOC645237 | 4 | 113497960 | 4 | 0.548068 |
| rs4834267      | LOC645237 | 4 | 113497960 | 7 | 0.275668 |
| rs1009475      | LOC645237 | 4 | 113500196 | 2 | 1.282675 |
| rs1009475      | LOC645237 | 4 | 113500196 | 5 | 0.207325 |
| rs1009475      | LOC645237 | 4 | 113500196 | 1 | 1.080938 |
| rs231253       | ALPK1     | 4 | 113582071 | 8 | 0.460883 |
| rs231253       | ALPK1     | 4 | 113582071 | 6 | 1.965952 |
| rs231253       | ALPK1     | 4 | 113582071 | 7 | 8.585226 |
| rs231253       | ALPK1     | 4 | 113582071 | 1 | 6.273511 |
| rs231253       | ALPK1     | 4 | 113582071 | 5 | 0.106469 |
| rs17605622     | LOC91431  | 4 | 113701595 | 3 | 0.829033 |
| rs17669218     | C4orf21   | 4 | 113744172 | 8 | 0.830173 |
| rs17669218     | C4orf21   | 4 | 113744172 | 3 | 1.107575 |
| SNP4-113758840 | C4orf21   | 4 | 113758840 | 8 | 3.670764 |
| rs13104310     | C4orf21   | 4 | 113773834 | 5 | 1.123027 |
| rs13104310     | C4orf21   | 4 | 113773834 | 8 | 2.222024 |
| rs13104310     | C4orf21   | 4 | 113773834 | 2 | 4.122494 |
| rs13104310     | C4orf21   | 4 | 113773834 | 1 | 0.183609 |
| rs3733617      | ANK2      | 4 | 114497726 | 8 | 0.524068 |
| rs10013743     | ANK2      | 4 | 114498871 | 2 | 3.41615  |
| rs11731775     | CAMK2D    | 4 | 114902163 | 7 | 0.868168 |
| rs11731775     | CAMK2D    | 4 | 114902163 | 1 | 2.157677 |

|                |         |   |           |   |          |
|----------------|---------|---|-----------|---|----------|
| rs10028980     | NDST3   | 4 | 119278737 | 3 | 0.056525 |
| rs617430       | NDST3   | 4 | 119381243 | 1 | 1.152218 |
| rs617430       | NDST3   | 4 | 119381243 | 5 | 0.043062 |
| rs617430       | NDST3   | 4 | 119381243 | 2 | 0.742247 |
| SNP4-119439357 | PRSS12  | 4 | 119439357 | 2 | 3.070212 |
| SNP4-119439357 | PRSS12  | 4 | 119439357 | 4 | 0.399162 |
| rs28720014     | CEP170L | 4 | 119663904 | 1 | 2.812444 |
| rs28720014     | CEP170L | 4 | 119663904 | 2 | 4.280234 |
| rs28720014     | CEP170L | 4 | 119663904 | 7 | 6.028299 |
| rs28720014     | CEP170L | 4 | 119663904 | 5 | 1.579058 |
| rs28720014     | CEP170L | 4 | 119663904 | 4 | 2.765695 |
| rs28720014     | CEP170L | 4 | 119663904 | 3 | 4.092793 |
| rs17263971     | SYNPO2  | 4 | 120167494 | 8 | 0.593098 |
| rs17263971     | SYNPO2  | 4 | 120167494 | 3 | 0.456439 |
| rs17263971     | SYNPO2  | 4 | 120167494 | 6 | 2.564177 |
| rs17263971     | SYNPO2  | 4 | 120167494 | 7 | 1.042002 |
| rs7698598      | SYNPO2  | 4 | 120171095 | 4 | 1.464003 |
| SNP4-120172403 | SYNPO2  | 4 | 120172403 | 1 | 4.864717 |
| SNP4-120172403 | SYNPO2  | 4 | 120172403 | 6 | 0.833278 |
| SNP4-120172403 | SYNPO2  | 4 | 120172403 | 5 | 0.558274 |
| rs17050125     | SYNPO2  | 4 | 120199949 | 3 | 0.276389 |
| rs17050125     | SYNPO2  | 4 | 120199949 | 1 | 1.151255 |
| rs1058450      | SYNPO2  | 4 | 120200088 | 1 | 0.270226 |
| rs1058450      | SYNPO2  | 4 | 120200088 | 7 | 1.39881  |
| rs1058450      | SYNPO2  | 4 | 120200088 | 6 | 0.72186  |
| rs17050116     | SYNPO2  | 4 | 120200744 | 3 | 0.870278 |
| rs10021107     | SYNPO2  | 4 | 120200812 | 3 | 0.961456 |
| rs1047894      | SYNPO2  | 4 | 120201276 | 3 | 0.855282 |
| rs7687613      | MYOZ2   | 4 | 120304896 | 1 | 3.349688 |
| rs878372       | FABP2   | 4 | 120458228 | 8 | 0.886309 |
| rs878372       | FABP2   | 4 | 120458228 | 2 | 1.578079 |
| rs10212775     | FABP2   | 4 | 120458692 | 6 | 0.172812 |
| rs10212775     | FABP2   | 4 | 120458692 | 2 | 1.31381  |
| rs11724758     | FABP2   | 4 | 120459326 | 1 | 0.656542 |
| rs13124532     | PDE5A   | 4 | 120635893 | 1 | 3.140434 |
| rs17006190     | PDE5A   | 4 | 120638286 | 2 | 3.438362 |
| rs17006190     | PDE5A   | 4 | 120638286 | 8 | 1.652522 |
| rs1160185      | SAR1P3  | 4 | 121482947 | 1 | 1.490989 |
| rs1160185      | SAR1P3  | 4 | 121482947 | 7 | 0.998451 |
| rs12499000     | PRDM5   | 4 | 121925651 | 5 | 1.559426 |
| rs12499000     | PRDM5   | 4 | 121925651 | 3 | 0.378411 |
| rs12499000     | PRDM5   | 4 | 121925651 | 7 | 0.652036 |
| rs12499000     | PRDM5   | 4 | 121925651 | 1 | 4.519256 |
| rs343192       | PRDM5   | 4 | 121957499 | 5 | 0.239823 |
| rs343192       | PRDM5   | 4 | 121957499 | 1 | 5.038532 |
| rs343192       | PRDM5   | 4 | 121957499 | 3 | 0.171333 |
| rs343192       | PRDM5   | 4 | 121957499 | 6 | 0.444993 |

|                |           |   |           |   |          |
|----------------|-----------|---|-----------|---|----------|
| rs343192       | PRDM5     | 4 | 121957499 | 7 | 0.011703 |
| rs2276959      | C4orf31   | 4 | 122186257 | 1 | 0.524513 |
| rs11098602     | TNIP3     | 4 | 122272091 | 7 | 0.56453  |
| rs11098602     | TNIP3     | 4 | 122272091 | 1 | 1.626918 |
| rs11098602     | TNIP3     | 4 | 122272091 | 3 | 0.372185 |
| rs6846553      | TNIP3     | 4 | 122272673 | 1 | 2.928813 |
| rs6846553      | TNIP3     | 4 | 122272673 | 7 | 0.008144 |
| SNP4-122287766 | TNIP3     | 4 | 122287766 | 3 | 0.38771  |
| rs17051298     | TNIP3     | 4 | 122295189 | 3 | 0.103496 |
| rs10000692     | TNIP3     | 4 | 122297767 | 3 | 0.962966 |
| rs2013534      | LOC729109 | 4 | 122510581 | 1 | 0.917003 |
| rs2013534      | LOC729109 | 4 | 122510581 | 7 | 1.127615 |
| rs2013534      | LOC729109 | 4 | 122510581 | 8 | 1.471207 |
| rs2013534      | LOC729109 | 4 | 122510581 | 5 | 1.445631 |
| rs692613       | LOC729112 | 4 | 122590616 | 4 | 0.295936 |
| rs692616       | LOC729112 | 4 | 122590698 | 5 | 0.821686 |
| rs1507996      | BBS7      | 4 | 122965179 | 5 | 4.189241 |
| rs1507996      | BBS7      | 4 | 122965179 | 3 | 0.393521 |
| rs1507996      | BBS7      | 4 | 122965179 | 6 | 4.598449 |
| rs1507996      | BBS7      | 4 | 122965179 | 4 | 0.458751 |
| rs11732666     | TRPC3     | 4 | 123043502 | 2 | 3.712917 |
| rs11732666     | TRPC3     | 4 | 123043502 | 3 | 2.140456 |
| rs7658836      | KIAA1109  | 4 | 123365201 | 4 | 5.360046 |
| rs7658836      | KIAA1109  | 4 | 123365201 | 8 | 6.747584 |
| SNP4-123411833 | KIAA1109  | 4 | 123411833 | 8 | 6.974    |
| SNP4-123411833 | KIAA1109  | 4 | 123411833 | 4 | 1.178223 |
| SNP4-123496411 | KIAA1109  | 4 | 123496411 | 2 | 6.135632 |
| SNP4-123496411 | KIAA1109  | 4 | 123496411 | 1 | 1.169936 |
| rs13134412     | NUDT6     | 4 | 124063166 | 4 | 5.153496 |
| rs13134412     | NUDT6     | 4 | 124063166 | 8 | 1.27445  |
| rs300572       | SPRY1     | 4 | 124540374 | 4 | 0.698757 |
| rs300572       | SPRY1     | 4 | 124540374 | 3 | 0.55237  |
| rs300572       | SPRY1     | 4 | 124540374 | 5 | 0.488652 |
| rs300572       | SPRY1     | 4 | 124540374 | 6 | 3.805057 |
| rs300572       | SPRY1     | 4 | 124540374 | 2 | 5.888156 |
| rs17009618     | FAT4      | 4 | 126556153 | 6 | 0.9305   |
| rs1567047      | FAT4      | 4 | 126592192 | 4 | 0.384777 |
| rs1567047      | FAT4      | 4 | 126592192 | 5 | 0.124443 |
| rs1567047      | FAT4      | 4 | 126592192 | 8 | 1.892775 |
| SNP4-126592425 | FAT4      | 4 | 126592425 | 8 | 4.146928 |
| rs1014866      | FAT4      | 4 | 126632025 | 7 | 0.567915 |
| rs1014866      | FAT4      | 4 | 126632025 | 8 | 0.604653 |
| rs1014867      | FAT4      | 4 | 126632341 | 2 | 2.796785 |
| rs313098       | LOC132817 | 4 | 127705080 | 4 | 2.596035 |
| rs313098       | LOC132817 | 4 | 127705080 | 3 | 2.530014 |
| rs313098       | LOC132817 | 4 | 127705080 | 5 | 2.227076 |
| rs313098       | LOC132817 | 4 | 127705080 | 8 | 1.545001 |

|            |           |   |           |   |          |
|------------|-----------|---|-----------|---|----------|
| rs3749507  | INTU      | 4 | 128784450 | 3 | 0.624242 |
| rs3749507  | INTU      | 4 | 128784450 | 6 | 2.76704  |
| rs3749507  | INTU      | 4 | 128784450 | 5 | 0.448977 |
| rs3749507  | INTU      | 4 | 128784450 | 4 | 1.19135  |
| rs3749507  | INTU      | 4 | 128784450 | 8 | 5.472501 |
| rs2305958  | SLC25A31  | 4 | 128909386 | 5 | 3.110305 |
| rs3811740  | PLK4      | 4 | 129026669 | 4 | 0.037701 |
| rs3811740  | PLK4      | 4 | 129026669 | 5 | 0.039447 |
| rs3811740  | PLK4      | 4 | 129026669 | 8 | 0.610054 |
| rs3811740  | PLK4      | 4 | 129026669 | 6 | 3.5945   |
| rs12645577 | LARP2     | 4 | 129320093 | 5 | 0.128591 |
| rs12645577 | LARP2     | 4 | 129320093 | 6 | 0.317779 |
| rs12645577 | LARP2     | 4 | 129320093 | 8 | 0.423151 |
| rs12645577 | LARP2     | 4 | 129320093 | 4 | 4.015923 |
| rs10028124 | SCLT1     | 4 | 130086730 | 8 | 6.484413 |
| rs10028124 | SCLT1     | 4 | 130086730 | 5 | 1.365997 |
| rs10028124 | SCLT1     | 4 | 130086730 | 6 | 1.43201  |
| rs1757935  | C4orf33   | 4 | 130243209 | 4 | 0.480919 |
| rs1757935  | C4orf33   | 4 | 130243209 | 2 | 6.859951 |
| rs2271570  | C4orf33   | 4 | 130250094 | 8 | 0.751022 |
| rs2271570  | C4orf33   | 4 | 130250094 | 4 | 4.972689 |
| rs3749589  | PCDH10    | 4 | 134293508 | 5 | 0.712259 |
| rs11099273 | LOC132430 | 4 | 135340516 | 4 | 1.45511  |
| rs11099273 | LOC132430 | 4 | 135340516 | 3 | 0.847321 |
| rs11099273 | LOC132430 | 4 | 135340516 | 8 | 0.856694 |
| rs2044116  | LOC132430 | 4 | 135340818 | 4 | 0.087993 |
| rs2044116  | LOC132430 | 4 | 135340818 | 8 | 0.159834 |
| rs2044116  | LOC132430 | 4 | 135340818 | 3 | 0.795336 |
| rs10009368 | LOC132430 | 4 | 135341051 | 8 | 0.357573 |
| rs10009368 | LOC132430 | 4 | 135341051 | 3 | 0.977564 |
| rs28568985 | LOC389223 | 4 | 136186045 | 7 | 2.43264  |
| rs28568985 | LOC389223 | 4 | 136186045 | 1 | 3.826377 |
| rs28568985 | LOC389223 | 4 | 136186045 | 2 | 3.907734 |
| rs17239836 | LOC729578 | 4 | 137938839 | 3 | 4.109202 |
| rs10018837 | PCDH18    | 4 | 138669133 | 8 | 1.160766 |
| rs10018837 | PCDH18    | 4 | 138669133 | 3 | 0.511458 |
| rs10018837 | PCDH18    | 4 | 138669133 | 1 | 3.285215 |
| rs10018837 | PCDH18    | 4 | 138669133 | 7 | 1.349614 |
| rs6838248  | SLC7A11   | 4 | 139359944 | 5 | 6.713306 |
| rs6838248  | SLC7A11   | 4 | 139359944 | 7 | 6.689642 |
| rs13137997 | RAB33B    | 4 | 140614325 | 1 | 2.576804 |
| rs7435309  | SETD7     | 4 | 140649300 | 3 | 0.953923 |
| rs1026049  | SETD7     | 4 | 140649658 | 1 | 4.927458 |
| rs1026049  | SETD7     | 4 | 140649658 | 7 | 0.248284 |
| rs1026049  | SETD7     | 4 | 140649658 | 5 | 0.097918 |
| rs2132845  | MGST2     | 4 | 140806575 | 2 | 5.56735  |
| rs11944843 | MAML3     | 4 | 140857153 | 8 | 0.629204 |



|                |           |   |           |   |          |
|----------------|-----------|---|-----------|---|----------|
| rs3822043      | MAML3     | 4 | 140859729 | 2 | 5.056079 |
| rs3822043      | MAML3     | 4 | 140859729 | 4 | 0.999495 |
| rs3805317      | CLGN      | 4 | 141529676 | 4 | 0.261503 |
| rs2321270      | LOC646484 | 4 | 141641767 | 7 | 3.364037 |
| rs2270565      | UCP1      | 4 | 141702921 | 4 | 0.365465 |
| rs17006560     | RNF150    | 4 | 142008646 | 1 | 5.932959 |
| rs17006560     | RNF150    | 4 | 142008646 | 3 | 0.345975 |
| rs1057972      | IL15      | 4 | 142873882 | 5 | 1.383308 |
| rs1057972      | IL15      | 4 | 142873882 | 2 | 1.658095 |
| rs1057972      | IL15      | 4 | 142873882 | 8 | 1.308642 |
| rs1057972      | IL15      | 4 | 142873882 | 7 | 0.065953 |
| rs1057972      | IL15      | 4 | 142873882 | 3 | 0.542109 |
| rs13137565     | LOC729675 | 4 | 144325148 | 8 | 1.102512 |
| rs13137565     | LOC729675 | 4 | 144325148 | 1 | 3.405669 |
| rs13137565     | LOC729675 | 4 | 144325148 | 3 | 2.354692 |
| rs13137565     | LOC729675 | 4 | 144325148 | 6 | 2.90021  |
| rs13137565     | LOC729675 | 4 | 144325148 | 7 | 2.031278 |
| rs4240334      | GYPE      | 4 | 145011955 | 6 | 0.863227 |
| rs4240334      | GYPE      | 4 | 145011955 | 8 | 1.339871 |
| rs4240334      | GYPE      | 4 | 145011955 | 1 | 0.890079 |
| rs1808991      | GYPE      | 4 | 145012409 | 3 | 6.046077 |
| rs1808991      | GYPE      | 4 | 145012409 | 6 | 4.635419 |
| rs1808991      | GYPE      | 4 | 145012409 | 1 | 4.783333 |
| rs1808991      | GYPE      | 4 | 145012409 | 4 | 4.725481 |
| SNP4-145138162 | GYPB      | 4 | 145138162 | 6 | 0.472945 |
| SNP4-145138162 | GYPB      | 4 | 145138162 | 4 | 0.171165 |
| SNP4-145138162 | GYPB      | 4 | 145138162 | 3 | 0.360168 |
| SNP4-145138162 | GYPB      | 4 | 145138162 | 1 | 0.149696 |
| SNP4-145138162 | GYPB      | 4 | 145138162 | 7 | 0.104647 |
| rs1132787      | GYPB      | 4 | 145249996 | 4 | 1.550794 |
| rs11727676     | HHIP      | 4 | 145878514 | 7 | 0.688402 |
| rs13144151     | NULL      | 4 | 146622615 | 3 | 0.296605 |
| rs1390981      | LOC729497 | 4 | 146766151 | 2 | 0.773796 |
| rs1390981      | LOC729497 | 4 | 146766151 | 1 | 3.714533 |
| rs1390981      | LOC729497 | 4 | 146766151 | 7 | 5.919093 |
| rs1390981      | LOC729497 | 4 | 146766151 | 3 | 4.25664  |
| rs1390981      | LOC729497 | 4 | 146766151 | 5 | 4.517205 |
| rs4835011      | MMAA      | 4 | 146779686 | 3 | 0.411262 |
| rs10013280     | TTC29     | 4 | 148008159 | 1 | 0.293735 |
| rs10013280     | TTC29     | 4 | 148008159 | 2 | 0.618965 |
| rs10013280     | TTC29     | 4 | 148008159 | 7 | 0.085419 |
| rs10013280     | TTC29     | 4 | 148008159 | 5 | 1.401951 |
| rs35231662     | TTC29     | 4 | 148008178 | 5 | 0.345056 |
| rs35231662     | TTC29     | 4 | 148008178 | 3 | 0.120036 |
| rs1801708      | EDNRA     | 4 | 148621819 | 8 | 1.054046 |
| rs1801708      | EDNRA     | 4 | 148621819 | 1 | 3.809746 |
| rs5342         | EDNRA     | 4 | 148684221 | 6 | 2.289621 |

|                |           |   |           |   |          |
|----------------|-----------|---|-----------|---|----------|
| rs5343         | EDNRA     | 4 | 148684442 | 2 | 1.456233 |
| rs5343         | EDNRA     | 4 | 148684442 | 8 | 7.405183 |
| rs10305937     | EDNRA     | 4 | 148684876 | 2 | 4.107716 |
| rs11557361     | LOC90826  | 4 | 148779643 | 4 | 0.899859 |
| rs2871         | NR3C2     | 4 | 149219474 | 1 | 6.597664 |
| rs2871         | NR3C2     | 4 | 149219474 | 6 | 3.897256 |
| rs2871         | NR3C2     | 4 | 149219474 | 4 | 3.905225 |
| rs5536         | NR3C2     | 4 | 149220143 | 1 | 5.666671 |
| rs17024360     | NR3C2     | 4 | 149221533 | 1 | 4.99446  |
| rs5525         | NR3C2     | 4 | 149575966 | 6 | 5.282752 |
| rs5525         | NR3C2     | 4 | 149575966 | 8 | 0.78389  |
| rs3749574      | LRBA      | 4 | 151426577 | 6 | 7.365039 |
| rs13105060     | MAB21L2   | 4 | 151724772 | 8 | 4.691075 |
| rs11735845     | LRBA      | 4 | 151984786 | 6 | 0.873372 |
| SNP4-152431936 | ESSPL     | 4 | 152431936 | 7 | 0.510799 |
| SNP4-152431936 | ESSPL     | 4 | 152431936 | 6 | 1.921005 |
| SNP4-152431936 | ESSPL     | 4 | 152431936 | 5 | 0.016239 |
| SNP4-152431936 | ESSPL     | 4 | 152431936 | 8 | 4.730732 |
| SNP4-152431936 | ESSPL     | 4 | 152431936 | 2 | 3.94682  |
| rs17275536     | LOC729830 | 4 | 152718075 | 8 | 1.221187 |
| rs17275536     | LOC729830 | 4 | 152718075 | 7 | 0.495931 |
| rs17275536     | LOC729830 | 4 | 152718075 | 3 | 0.190445 |
| rs4696354      | TIGD4     | 4 | 153910292 | 8 | 0.770932 |
| rs4696354      | TIGD4     | 4 | 153910292 | 6 | 1.31292  |
| rs4696354      | TIGD4     | 4 | 153910292 | 3 | 0.093975 |
| rs4696354      | TIGD4     | 4 | 153910292 | 7 | 0.191287 |
| rs3811833      | FHDC1     | 4 | 154115808 | 6 | 0.262454 |
| rs3811833      | FHDC1     | 4 | 154115808 | 5 | 0.321423 |
| rs4696370      | FHDC1     | 4 | 154117628 | 5 | 0.234167 |
| rs4696370      | FHDC1     | 4 | 154117628 | 6 | 0.01604  |
| rs1059354      | FHDC1     | 4 | 154119023 | 6 | 3.486737 |
| rs1059354      | FHDC1     | 4 | 154119023 | 5 | 0.516512 |
| rs3749538      | TRIM2     | 4 | 154476345 | 2 | 3.048398 |
| rs3749538      | TRIM2     | 4 | 154476345 | 5 | 1.419049 |
| rs10001845     | KIAA0922  | 4 | 154697672 | 3 | 0.071527 |
| rs7669418      | KIAA0922  | 4 | 154733077 | 8 | 2.70242  |
| rs7669418      | KIAA0922  | 4 | 154733077 | 5 | 0.298003 |
| rs7669418      | KIAA0922  | 4 | 154733077 | 7 | 0.594313 |
| rs7669418      | KIAA0922  | 4 | 154733077 | 4 | 4.168286 |
| rs7669741      | KIAA0922  | 4 | 154733172 | 4 | 1.062486 |
| rs7669741      | KIAA0922  | 4 | 154733172 | 5 | 0.89975  |
| rs7669741      | KIAA0922  | 4 | 154733172 | 8 | 0.996338 |
| rs35627765     | KIAA0922  | 4 | 154773327 | 6 | 3.343112 |
| rs1339         | RNF175    | 4 | 154851013 | 8 | 5.932899 |
| rs1339         | RNF175    | 4 | 154851013 | 3 | 0.181185 |
| rs1339         | RNF175    | 4 | 154851013 | 5 | 0.760492 |
| rs1339         | RNF175    | 4 | 154851013 | 4 | 3.027534 |

|                |             |   |           |   |          |
|----------------|-------------|---|-----------|---|----------|
| rs1337         | RNF175      | 4 | 154851037 | 4 | 3.890745 |
| rs1337         | RNF175      | 4 | 154851037 | 6 | 1.47585  |
| rs17031387     | DCHS2       | 4 | 155438811 | 4 | 0.219049 |
| rs11935573     | DCHS2       | 4 | 155461022 | 1 | 4.010971 |
| rs11935573     | DCHS2       | 4 | 155461022 | 3 | 0.438893 |
| rs11935573     | DCHS2       | 4 | 155461022 | 4 | 0.341195 |
| SNP4-155461185 | DCHS2       | 4 | 155461185 | 8 | 0.702593 |
| rs6858157      | DCHS2       | 4 | 155475627 | 3 | 2.839345 |
| rs6858157      | DCHS2       | 4 | 155475627 | 4 | 1.175272 |
| rs6858157      | DCHS2       | 4 | 155475627 | 8 | 1.494701 |
| rs6858157      | DCHS2       | 4 | 155475627 | 1 | 3.087652 |
| rs7656522      | DCHS2       | 4 | 155630515 | 2 | 2.718291 |
| rs6056         | FGB         | 4 | 155708271 | 2 | 2.463697 |
| SNP4-155938639 | RBM46       | 4 | 155938639 | 3 | 0.174404 |
| rs156502       | RBM46       | 4 | 155939724 | 2 | 4.345212 |
| rs156502       | RBM46       | 4 | 155939724 | 3 | 0.431524 |
| rs156502       | RBM46       | 4 | 155939724 | 5 | 1.127915 |
| rs1047214      | NPY2R       | 4 | 156355126 | 5 | 2.923375 |
| rs1047214      | NPY2R       | 4 | 156355126 | 1 | 2.453928 |
| rs1047214      | NPY2R       | 4 | 156355126 | 2 | 3.421979 |
| rs3088086      | MAP9        | 4 | 156486311 | 1 | 1.689297 |
| rs3088086      | MAP9        | 4 | 156486311 | 3 | 0.633198 |
| rs3088086      | MAP9        | 4 | 156486311 | 5 | 0.24252  |
| rs11099999     | MAP9        | 4 | 156487303 | 3 | 0.120281 |
| rs11099999     | MAP9        | 4 | 156487303 | 5 | 0.085163 |
| rs11099999     | MAP9        | 4 | 156487303 | 1 | 5.900527 |
| rs2305050      | MAP9        | 4 | 156493218 | 5 | 0.384107 |
| rs2305050      | MAP9        | 4 | 156493218 | 1 | 5.253519 |
| rs2305050      | MAP9        | 4 | 156493218 | 3 | 1.167871 |
| rs17377679     | MAP9        | 4 | 156516510 | 1 | 5.080337 |
| rs17377679     | MAP9        | 4 | 156516510 | 6 | 1.574973 |
| rs17377679     | MAP9        | 4 | 156516510 | 4 | 0.276774 |
| rs2305981      | GUCY1B3     | 4 | 156940648 | 8 | 2.973211 |
| rs2305981      | GUCY1B3     | 4 | 156940648 | 2 | 2.857811 |
| rs2305981      | GUCY1B3     | 4 | 156940648 | 7 | 0.488903 |
| rs11943855     | hCG_1814936 | 4 | 157777176 | 3 | 0.377172 |
| rs11943855     | hCG_1814936 | 4 | 157777176 | 1 | 1.021411 |
| rs10028490     | C4orf18     | 4 | 159267052 | 2 | 1.239196 |
| rs2009748      | LOC646890   | 4 | 159418832 | 1 | 2.569219 |
| rs12331717     | LOC92345    | 4 | 164307509 | 5 | 0.962854 |
| rs12331717     | LOC92345    | 4 | 164307509 | 3 | 0.625986 |
| rs4552421      | NPY1R       | 4 | 164465113 | 1 | 5.26326  |
| rs13306006     | NPY1R       | 4 | 164473165 | 2 | 5.399456 |
| rs12507653     | LOC729743   | 4 | 164473783 | 3 | 1.315483 |
| rs12507653     | LOC729743   | 4 | 164473783 | 5 | 0.78881  |
| rs12507653     | LOC729743   | 4 | 164473783 | 1 | 0.153718 |
| rs11735477     | TKTL2       | 4 | 164612567 | 1 | 1.011451 |

|            |           |   |           |   |          |
|------------|-----------|---|-----------|---|----------|
| rs2276977  | FLJ11184  | 4 | 164635380 | 1 | 5.865448 |
| rs1133505  | 1-Mar     | 4 | 164668558 | 1 | 0.332639 |
| rs1133505  | 1-Mar     | 4 | 164668558 | 8 | 0.199059 |
| rs1133505  | 1-Mar     | 4 | 164668558 | 3 | 0.702632 |
| rs1133505  | 1-Mar     | 4 | 164668558 | 6 | 0.327201 |
| rs1133505  | 1-Mar     | 4 | 164668558 | 5 | 0.07009  |
| rs1133505  | 1-Mar     | 4 | 164668558 | 7 | 1.28455  |
| rs1133505  | 1-Mar     | 4 | 164668558 | 2 | 1.235944 |
| rs1133505  | 1-Mar     | 4 | 164668558 | 4 | 4.089223 |
| rs6816526  | 1-Mar     | 4 | 164668723 | 3 | 0.612126 |
| rs6816526  | 1-Mar     | 4 | 164668723 | 7 | 1.299493 |
| rs6816526  | 1-Mar     | 4 | 164668723 | 5 | 4.435023 |
| rs6816526  | 1-Mar     | 4 | 164668723 | 4 | 0.698932 |
| rs6816526  | 1-Mar     | 4 | 164668723 | 6 | 3.27224  |
| rs13130399 | 1-Mar     | 4 | 164686274 | 5 | 0.165532 |
| rs13130399 | 1-Mar     | 4 | 164686274 | 3 | 0.758931 |
| rs13130399 | 1-Mar     | 4 | 164686274 | 2 | 0.190333 |
| rs13130399 | 1-Mar     | 4 | 164686274 | 4 | 0.918116 |
| rs13130399 | 1-Mar     | 4 | 164686274 | 7 | 0.275303 |
| rs13130399 | 1-Mar     | 4 | 164686274 | 8 | 0.498288 |
| rs13130399 | 1-Mar     | 4 | 164686274 | 1 | 0.380984 |
| rs7698990  | LOC646954 | 4 | 165073820 | 6 | 3.405598 |
| rs17584342 | LOC653794 | 4 | 166057081 | 3 | 1.401145 |
| rs17584342 | LOC653794 | 4 | 166057081 | 1 | 2.164759 |
| rs4359860  | LOC391710 | 4 | 166079401 | 7 | 0.51985  |
| rs4359860  | LOC391710 | 4 | 166079401 | 3 | 0.437468 |
| rs4359860  | LOC391710 | 4 | 166079401 | 1 | 0.627192 |
| rs10020204 | LOC391711 | 4 | 166089273 | 1 | 0.498725 |
| rs10034083 | C4orf39   | 4 | 166098457 | 1 | 5.432783 |
| rs10034083 | C4orf39   | 4 | 166098457 | 7 | 0.993705 |
| rs6536886  | TRIM60    | 4 | 166172705 | 3 | 0.017303 |
| rs6536886  | TRIM60    | 4 | 166172705 | 6 | 0.527716 |
| rs6536886  | TRIM60    | 4 | 166172705 | 4 | 0.042865 |
| rs6536886  | TRIM60    | 4 | 166172705 | 7 | 0.464458 |
| rs6819917  | TRIM75    | 4 | 166200592 | 3 | 0.137321 |
| rs17045936 | TRIM75    | 4 | 166201120 | 3 | 1.201936 |
| rs9999037  | TMEM192   | 4 | 166219645 | 5 | 0.034589 |
| rs2279723  | TLL1      | 4 | 167241809 | 5 | 0.085172 |
| rs2279723  | TLL1      | 4 | 167241809 | 1 | 0.418972 |
| rs2279723  | TLL1      | 4 | 167241809 | 7 | 0.092074 |
| rs1497949  | TLL1      | 4 | 167244165 | 1 | 0.553756 |
| rs1497949  | TLL1      | 4 | 167244165 | 5 | 0.224512 |
| rs1497948  | TLL1      | 4 | 167244355 | 7 | 1.920339 |
| rs1497948  | TLL1      | 4 | 167244355 | 5 | 0.589603 |
| rs1497948  | TLL1      | 4 | 167244355 | 1 | 0.859927 |
| rs1057377  | SPOCK3    | 4 | 167892648 | 6 | 4.205304 |
| rs1057377  | SPOCK3    | 4 | 167892648 | 2 | 5.38296  |

|                |           |   |           |   |          |
|----------------|-----------|---|-----------|---|----------|
| rs1057377      | SPOCK3    | 4 | 167892648 | 1 | 4.317852 |
| rs12880        | DDX60L    | 4 | 169514736 | 8 | 3.863916 |
| rs12880        | DDX60L    | 4 | 169514736 | 4 | 4.908875 |
| rs12880        | DDX60L    | 4 | 169514736 | 5 | 0.345949 |
| SNP4-169537513 | DDX60L    | 4 | 169537513 | 3 | 1.741752 |
| SNP4-169537513 | DDX60L    | 4 | 169537513 | 6 | 4.468953 |
| SNP4-169579619 | DDX60L    | 4 | 169579619 | 1 | 3.764702 |
| SNP4-169579619 | DDX60L    | 4 | 169579619 | 4 | 0.594814 |
| SNP4-169579619 | DDX60L    | 4 | 169579619 | 6 | 0.565928 |
| SNP4-169579619 | DDX60L    | 4 | 169579619 | 5 | 0.93437  |
| rs2319850      | DDX60L    | 4 | 169584979 | 1 | 6.125912 |
| rs13151700     | DDX60L    | 4 | 169599132 | 2 | 6.415919 |
| rs13151700     | DDX60L    | 4 | 169599132 | 6 | 3.008737 |
| rs13151700     | DDX60L    | 4 | 169599132 | 5 | 6.353896 |
| rs1806729      | PALLD     | 4 | 169669416 | 3 | 0.61066  |
| SNP4-169843224 | PALLD     | 4 | 169843224 | 4 | 0.382532 |
| SNP4-169843224 | PALLD     | 4 | 169843224 | 6 | 5.367729 |
| rs12510359     | LOC727835 | 4 | 169913967 | 2 | 0.953588 |
| rs12510359     | LOC727835 | 4 | 169913967 | 1 | 0.061132 |
| rs7439293      | LOC727835 | 4 | 169914061 | 2 | 4.064072 |
| rs7439293      | LOC727835 | 4 | 169914061 | 1 | 1.482968 |
| rs7439293      | LOC727835 | 4 | 169914061 | 5 | 2.945763 |
| rs7439293      | LOC727835 | 4 | 169914061 | 3 | 2.765743 |
| rs7439293      | LOC727835 | 4 | 169914061 | 6 | 4.641168 |
| rs7439293      | LOC727835 | 4 | 169914061 | 8 | 4.726297 |
| rs17054604     | CBR4      | 4 | 170146168 | 3 | 0.071605 |
| SNP4-170635029 | NEK1      | 4 | 170635029 | 1 | 0.71583  |
| SNP4-170635029 | NEK1      | 4 | 170635029 | 4 | 2.724374 |
| SNP4-170713700 | NEK1      | 4 | 170713700 | 2 | 6.318353 |
| rs17055101     | CLCN3     | 4 | 170870965 | 2 | 4.175297 |
| rs1047642      | C4orf27   | 4 | 170899810 | 4 | 0.634574 |
| rs3733432      | LOC441052 | 4 | 172970363 | 7 | 0.660121 |
| rs2019683      | GALNT17   | 4 | 174199000 | 5 | 0.342201 |
| rs744724       | NBLA00301 | 4 | 174696398 | 1 | 1.883323 |
| rs10565        | KIAA1712  | 4 | 175477703 | 8 | 0.103991 |
| rs8752         | HPGD      | 4 | 175649052 | 1 | 3.015201 |
| rs8752         | HPGD      | 4 | 175649052 | 4 | 3.360421 |
| rs1050145      | HPGD      | 4 | 175679731 | 8 | 0.484425 |
| rs1050145      | HPGD      | 4 | 175679731 | 2 | 2.665929 |
| rs12648678     | GLRA3     | 4 | 175834855 | 2 | 1.274689 |
| rs12648678     | GLRA3     | 4 | 175834855 | 3 | 0.94848  |
| rs12651268     | GLRA3     | 4 | 175924716 | 3 | 3.05959  |
| rs12651268     | GLRA3     | 4 | 175924716 | 7 | 0.880988 |
| rs3733398      | GPM6A     | 4 | 176792579 | 2 | 2.240333 |
| rs11736872     | WDR17     | 4 | 177337638 | 3 | 0.497526 |
| rs11736872     | WDR17     | 4 | 177337638 | 4 | 3.07127  |
| rs11736872     | WDR17     | 4 | 177337638 | 2 | 1.652462 |

|                |           |   |           |   |          |
|----------------|-----------|---|-----------|---|----------|
| rs11736872     | WDR17     | 4 | 177337638 | 8 | 0.422813 |
| rs11736872     | WDR17     | 4 | 177337638 | 5 | 1.219745 |
| rs11736872     | WDR17     | 4 | 177337638 | 7 | 1.391937 |
| rs11736872     | WDR17     | 4 | 177337638 | 6 | 0.582231 |
| rs7699964      | WDR17     | 4 | 177338054 | 3 | 0.812491 |
| rs12502935     | SPATA4    | 4 | 177350773 | 4 | 0.347004 |
| rs6832177      | SPATA4    | 4 | 177350830 | 2 | 4.016171 |
| rs6832177      | SPATA4    | 4 | 177350830 | 4 | 0.778557 |
| rs6832177      | SPATA4    | 4 | 177350830 | 3 | 0.20901  |
| rs6832177      | SPATA4    | 4 | 177350830 | 7 | 1.037031 |
| rs2291244      | SPATA4    | 4 | 177350950 | 5 | 0.663315 |
| rs13109244     | ASB5      | 4 | 177373143 | 5 | 2.852894 |
| rs6827525      | ASB5      | 4 | 177374982 | 5 | 2.201981 |
| rs6827525      | ASB5      | 4 | 177374982 | 3 | 1.528696 |
| rs34193982     | NEIL3     | 4 | 178499778 | 5 | 0.086116 |
| rs34193982     | NEIL3     | 4 | 178499778 | 3 | 1.348709 |
| rs2309626      | MGC45800  | 4 | 183300005 | 8 | 0.267707 |
| rs11737546     | MGC45800  | 4 | 183300377 | 6 | 1.413924 |
| rs11737546     | MGC45800  | 4 | 183300377 | 5 | 0.461608 |
| rs17263582     | ODZ3      | 4 | 183911691 | 7 | 1.095269 |
| rs17263582     | ODZ3      | 4 | 183911691 | 6 | 1.508033 |
| rs11223        | ODZ3      | 4 | 183957844 | 3 | 0.363454 |
| rs11223        | ODZ3      | 4 | 183957844 | 6 | 0.110941 |
| rs2309777      | ODZ3      | 4 | 183959737 | 8 | 6.069977 |
| rs2309777      | ODZ3      | 4 | 183959737 | 6 | 0.791675 |
| rs2309777      | ODZ3      | 4 | 183959737 | 1 | 4.984788 |
| rs2309777      | ODZ3      | 4 | 183959737 | 3 | 0.708638 |
| rs2309777      | ODZ3      | 4 | 183959737 | 4 | 2.483955 |
| rs7277         | DCTD      | 4 | 184048507 | 8 | 1.754205 |
| rs7277         | DCTD      | 4 | 184048507 | 2 | 7.726239 |
| rs2016910      | FAM92A3   | 4 | 184196220 | 5 | 1.404679 |
| rs2016910      | FAM92A3   | 4 | 184196220 | 3 | 1.671508 |
| rs2016910      | FAM92A3   | 4 | 184196220 | 7 | 1.462402 |
| SNP4-184427227 | WWC2      | 4 | 184427227 | 3 | 0.151267 |
| SNP4-184440880 | WWC2      | 4 | 184440880 | 4 | 0.155306 |
| SNP4-184440880 | WWC2      | 4 | 184440880 | 5 | 0.083225 |
| SNP4-184440880 | WWC2      | 4 | 184440880 | 7 | 0.195049 |
| SNP4-184440880 | WWC2      | 4 | 184440880 | 6 | 0.755357 |
| rs10015804     | RWDD4A    | 4 | 184807709 | 4 | 0.244068 |
| rs10015804     | RWDD4A    | 4 | 184807709 | 3 | 1.078424 |
| rs4479748      | ENPP6     | 4 | 185249392 | 3 | 0.635707 |
| rs4479748      | ENPP6     | 4 | 185249392 | 1 | 2.312598 |
| rs6819481      | LOC391722 | 4 | 185475394 | 2 | 5.24973  |
| rs793896       | LOC728175 | 4 | 185487646 | 3 | 0.12679  |
| rs4647603      | CASP3     | 4 | 185806724 | 1 | 5.827221 |
| rs6825561      | MLF1IP    | 4 | 185852526 | 1 | 4.758134 |
| rs14969        | CCDC111   | 4 | 185852758 | 1 | 4.613687 |

|                |           |   |           |   |          |
|----------------|-----------|---|-----------|---|----------|
| rs6818447      | MLF1IP    | 4 | 185887148 | 1 | 4.941488 |
| rs11132270     | LOC728203 | 4 | 186162916 | 1 | 3.251014 |
| rs11132270     | LOC728203 | 4 | 186162916 | 7 | 0.440718 |
| rs11132270     | LOC728203 | 4 | 186162916 | 6 | 0.285095 |
| rs6839413      | KIAA1430  | 4 | 186327812 | 6 | 0.308272 |
| rs6839413      | KIAA1430  | 4 | 186327812 | 7 | 1.350961 |
| rs6839413      | KIAA1430  | 4 | 186327812 | 1 | 0.05517  |
| rs6814673      | KIAA1430  | 4 | 186328185 | 1 | 0.429648 |
| rs3797032      | LRP2BP    | 4 | 186536650 | 4 | 6.863393 |
| rs3797032      | LRP2BP    | 4 | 186536650 | 7 | 0.165511 |
| rs1048329      | LRP2BP    | 4 | 186536752 | 4 | 0.538652 |
| rs3733646      | C4orf20   | 4 | 186558441 | 1 | 0.138661 |
| rs3733646      | C4orf20   | 4 | 186558441 | 4 | 0.437576 |
| rs2289720      | C4orf20   | 4 | 186584049 | 2 | 3.289835 |
| rs2289720      | C4orf20   | 4 | 186584049 | 1 | 1.600745 |
| rs2289720      | C4orf20   | 4 | 186584049 | 7 | 2.281184 |
| rs2289720      | C4orf20   | 4 | 186584049 | 5 | 1.986803 |
| rs2120413      | CCDC110   | 4 | 186603376 | 2 | 2.835703 |
| SNP4-186616893 | CCDC110   | 4 | 186616893 | 3 | 0.056652 |
| SNP4-186616893 | CCDC110   | 4 | 186616893 | 1 | 5.709617 |
| SNP4-186616893 | CCDC110   | 4 | 186616893 | 7 | 0.389448 |
| SNP4-186616893 | CCDC110   | 4 | 186616893 | 6 | 7.121497 |
| SNP4-186616893 | CCDC110   | 4 | 186616893 | 4 | 2.79292  |
| SNP4-186617237 | CCDC110   | 4 | 186617237 | 4 | 0.081069 |
| SNP4-186617237 | CCDC110   | 4 | 186617237 | 7 | 0.546033 |
| SNP4-186617237 | CCDC110   | 4 | 186617237 | 1 | 3.675924 |
| SNP4-186617237 | CCDC110   | 4 | 186617237 | 6 | 2.210701 |
| SNP4-186617237 | CCDC110   | 4 | 186617237 | 3 | 0.765683 |
| rs11132306     | CCDC110   | 4 | 186617509 | 8 | 0.287059 |
| rs11132306     | CCDC110   | 4 | 186617509 | 3 | 0.581078 |
| rs11132306     | CCDC110   | 4 | 186617509 | 7 | 0.977468 |
| rs11132306     | CCDC110   | 4 | 186617509 | 6 | 5.680298 |
| rs11132306     | CCDC110   | 4 | 186617509 | 4 | 0.092919 |
| rs11132306     | CCDC110   | 4 | 186617509 | 1 | 5.302566 |
| rs7699687      | CCDC110   | 4 | 186618109 | 4 | 4.414362 |
| rs7699687      | CCDC110   | 4 | 186618109 | 6 | 1.562582 |
| rs7699687      | CCDC110   | 4 | 186618109 | 7 | 0.593957 |
| rs7699687      | CCDC110   | 4 | 186618109 | 1 | 4.148882 |
| rs7699687      | CCDC110   | 4 | 186618109 | 3 | 0.749098 |
| rs11132309     | CCDC110   | 4 | 186619200 | 7 | 0.960412 |
| rs11132309     | CCDC110   | 4 | 186619200 | 6 | 1.649382 |
| rs11132309     | CCDC110   | 4 | 186619200 | 3 | 0.137605 |
| rs11132309     | CCDC110   | 4 | 186619200 | 8 | 0.077144 |
| rs11132309     | CCDC110   | 4 | 186619200 | 1 | 5.098178 |
| rs11132309     | CCDC110   | 4 | 186619200 | 4 | 0.084    |
| rs10031753     | SORBS2    | 4 | 186744403 | 6 | 0.643646 |
| rs3775291      | TLR3      | 4 | 187241068 | 7 | 5.336321 |

|                |          |   |           |   |          |
|----------------|----------|---|-----------|---|----------|
| rs4862650      | FAM149A  | 4 | 187311827 | 6 | 3.292557 |
| rs4862650      | FAM149A  | 4 | 187311827 | 1 | 5.044902 |
| SNP4-187323556 | FAM149A  | 4 | 187323556 | 3 | 3.114511 |
| SNP4-187323556 | FAM149A  | 4 | 187323556 | 1 | 6.020986 |
| rs1877319      | FLJ38576 | 4 | 187347776 | 3 | 0.212998 |
| rs7696703      | FLJ38576 | 4 | 187347850 | 1 | 4.309838 |
| rs13146272     | CYP4V2   | 4 | 187357205 | 3 | 0.0799   |
| rs13146272     | CYP4V2   | 4 | 187357205 | 1 | 3.134346 |
| rs3736455      | CYP4V2   | 4 | 187359313 | 3 | 1.64391  |
| rs3736455      | CYP4V2   | 4 | 187359313 | 1 | 4.596332 |
| rs3736455      | CYP4V2   | 4 | 187359313 | 6 | 0.553465 |
| rs6842047      | CYP4V2   | 4 | 187370570 | 1 | 3.547979 |
| rs6842047      | CYP4V2   | 4 | 187370570 | 6 | 1.920326 |
| rs3733402      | KLKB1    | 4 | 187395028 | 5 | 0.371223 |
| rs3733402      | KLKB1    | 4 | 187395028 | 3 | 0.705085 |
| rs4253301      | KLKB1    | 4 | 187410006 | 6 | 0.648165 |
| rs4253301      | KLKB1    | 4 | 187410006 | 1 | 2.975014 |
| rs4253301      | KLKB1    | 4 | 187410006 | 4 | 1.73423  |
| SNP4-187821581 | FAT      | 4 | 187821581 | 8 | 0.377613 |
| rs1877731      | FAT      | 4 | 187865392 | 3 | 0.045455 |
| rs1877731      | FAT      | 4 | 187865392 | 7 | 0.231027 |
| rs367863       | FAT      | 4 | 187866134 | 3 | 0.19682  |
| rs6815391      | ZFP42    | 4 | 189161973 | 3 | 1.008375 |
| rs2279550      | TRIML2   | 4 | 189249722 | 7 | 5.28744  |
| rs2279550      | TRIML2   | 4 | 189249722 | 1 | 3.78934  |
| rs2279550      | TRIML2   | 4 | 189249722 | 4 | 2.279786 |
| rs11934889     | TRIML1   | 4 | 189297604 | 5 | 0.016538 |
| rs2077107      | TUBB4Q   | 4 | 191140682 | 8 | 1.807279 |
| rs2077107      | TUBB4Q   | 4 | 191140682 | 7 | 3.575698 |
| rs12519352     | PLEKHG4B | 5 | 234730    | 8 | 3.128543 |
| rs12519352     | PLEKHG4B | 5 | 234730    | 3 | 0.112417 |
| rs11133847     | PLEKHG4B | 5 | 234762    | 4 | 2.669375 |
| rs11133847     | PLEKHG4B | 5 | 234762    | 5 | 1.659475 |
| rs11133847     | PLEKHG4B | 5 | 234762    | 8 | 1.320258 |
| rs11133847     | PLEKHG4B | 5 | 234762    | 2 | 2.669417 |
| rs11133847     | PLEKHG4B | 5 | 234762    | 3 | 0.616148 |
| rs13176160     | PLEKHG4B | 5 | 236401    | 8 | 0.829996 |
| rs4956991      | PLEKHG4B | 5 | 236516    | 2 | 4.357552 |
| rs4956991      | PLEKHG4B | 5 | 236516    | 4 | 1.893539 |
| rs4956991      | PLEKHG4B | 5 | 236516    | 3 | 2.463899 |
| rs4956991      | PLEKHG4B | 5 | 236516    | 8 | 2.416478 |
| rs4956991      | PLEKHG4B | 5 | 236516    | 5 | 1.704094 |
| rs4956925      | PLEKHG4B | 5 | 237336    | 3 | 0.69074  |
| rs4956925      | PLEKHG4B | 5 | 237336    | 4 | 1.066997 |
| rs4956925      | PLEKHG4B | 5 | 237336    | 8 | 0.658739 |
| rs4956925      | PLEKHG4B | 5 | 237336    | 5 | 0.447416 |
| rs1053477      | PLEKHG4B | 5 | 237393    | 3 | 0.20496  |



|            |          |   |        |   |          |
|------------|----------|---|--------|---|----------|
| rs1053477  | PLEKHG4B | 5 | 237393 | 5 | 0.27579  |
| rs1053477  | PLEKHG4B | 5 | 237393 | 4 | 0.151395 |
| rs1053477  | PLEKHG4B | 5 | 237393 | 8 | 0.303536 |
| rs4956993  | PLEKHG4B | 5 | 237702 | 5 | 0.383443 |
| rs4956993  | PLEKHG4B | 5 | 237702 | 8 | 1.066735 |
| rs4956993  | PLEKHG4B | 5 | 237702 | 3 | 0.545021 |
| rs4956993  | PLEKHG4B | 5 | 237702 | 4 | 0.35794  |
| rs1053478  | PLEKHG4B | 5 | 237750 | 8 | 2.253642 |
| rs1053478  | PLEKHG4B | 5 | 237750 | 3 | 0.737279 |
| rs1053478  | PLEKHG4B | 5 | 237750 | 5 | 0.689258 |
| rs1053479  | PLEKHG4B | 5 | 237760 | 3 | 0.902106 |
| rs1053479  | PLEKHG4B | 5 | 237760 | 5 | 0.154846 |
| rs1053479  | PLEKHG4B | 5 | 237760 | 4 | 0.766883 |
| rs6554947  | PLEKHG4B | 5 | 238160 | 3 | 0.109316 |
| rs7727015  | PLEKHG4B | 5 | 238498 | 3 | 0.144142 |
| rs7734578  | PLEKHG4B | 5 | 238519 | 2 | 2.744374 |
| rs7734578  | PLEKHG4B | 5 | 238519 | 5 | 1.029565 |
| rs7734578  | PLEKHG4B | 5 | 238519 | 4 | 0.353263 |
| rs7734578  | PLEKHG4B | 5 | 238519 | 3 | 1.132964 |
| rs1993519  | PLEKHG4B | 5 | 241321 | 5 | 0.575331 |
| rs17559144 | PLEKHG4B | 5 | 241719 | 4 | 1.141507 |
| rs17559144 | PLEKHG4B | 5 | 241719 | 5 | 0.847248 |
| rs17559144 | PLEKHG4B | 5 | 241719 | 8 | 1.674821 |
| rs17559144 | PLEKHG4B | 5 | 241719 | 7 | 1.176063 |
| rs17559144 | PLEKHG4B | 5 | 241719 | 3 | 0.54383  |
| rs6874933  | PLEKHG4B | 5 | 241747 | 5 | 0.949224 |
| rs29680    | PLEKHG4B | 5 | 241896 | 1 | 1.672188 |
| rs29680    | PLEKHG4B | 5 | 241896 | 3 | 0.954005 |
| rs6883247  | PLEKHG4B | 5 | 241918 | 3 | 0.372039 |
| rs13474    | CCDC127  | 5 | 258077 | 2 | 2.624871 |
| rs2672779  | AHRR     | 5 | 488055 | 4 | 0.456617 |
| rs2672779  | AHRR     | 5 | 488055 | 3 | 0.574966 |
| rs2672779  | AHRR     | 5 | 488055 | 2 | 2.163856 |
| rs2672779  | AHRR     | 5 | 488055 | 5 | 0.113221 |
| rs2672779  | AHRR     | 5 | 488055 | 7 | 0.042087 |
| rs2247114  | SLC9A3   | 5 | 528104 | 7 | 0.006472 |
| rs2247114  | SLC9A3   | 5 | 528104 | 6 | 1.682444 |
| rs2247114  | SLC9A3   | 5 | 528104 | 4 | 0.051996 |
| rs2247114  | SLC9A3   | 5 | 528104 | 3 | 1.028761 |
| rs868649   | CEP72    | 5 | 693705 | 2 | 2.423844 |
| rs868649   | CEP72    | 5 | 693705 | 4 | 0.519456 |
| rs383167   | TPPP     | 5 | 715030 | 2 | 0.717509 |
| rs383167   | TPPP     | 5 | 715030 | 4 | 1.199273 |
| rs383167   | TPPP     | 5 | 715030 | 1 | 0.308082 |
| rs1709542  | TPPP     | 5 | 715543 | 4 | 1.462385 |
| rs1709542  | TPPP     | 5 | 715543 | 1 | 0.739937 |
| rs1709542  | TPPP     | 5 | 715543 | 2 | 0.785933 |

|            |           |   |         |   |          |
|------------|-----------|---|---------|---|----------|
| rs1709542  | TPPP      | 5 | 715543  | 6 | 0.030418 |
| rs1709542  | TPPP      | 5 | 715543  | 8 | 6.062565 |
| rs16900955 | TPPP      | 5 | 717952  | 4 | 0.824042 |
| rs1697963  | TPPP      | 5 | 718280  | 5 | 4.296082 |
| rs1697963  | TPPP      | 5 | 718280  | 8 | 7.919229 |
| rs1697963  | TPPP      | 5 | 718280  | 2 | 0.226443 |
| rs1697963  | TPPP      | 5 | 718280  | 1 | 0.324406 |
| rs3747733  | ZDHC11    | 5 | 904046  | 7 | 1.318461 |
| GA022510   | TRIP13    | 5 | 967664  | 3 | 1.061987 |
| rs6865765  | SLC12A7   | 5 | 1134702 | 2 | 1.796814 |
| rs2853690  | TERT      | 5 | 1306744 | 3 | 0.302428 |
| rs2736098  | TERT      | 5 | 1347086 | 3 | 0.499358 |
| rs2736098  | TERT      | 5 | 1347086 | 4 | 1.148497 |
| rs2736098  | TERT      | 5 | 1347086 | 7 | 0.395523 |
| rs1809939  | SLC6A3    | 5 | 1446063 | 5 | 1.967484 |
| rs1809939  | SLC6A3    | 5 | 1446063 | 1 | 1.285065 |
| rs1809939  | SLC6A3    | 5 | 1446063 | 3 | 1.443262 |
| rs8352     | LPCAT1    | 5 | 1516051 | 1 | 2.253466 |
| rs8352     | LPCAT1    | 5 | 1516051 | 7 | 0.422745 |
| rs8352     | LPCAT1    | 5 | 1516051 | 4 | 6.644011 |
| rs8352     | LPCAT1    | 5 | 1516051 | 3 | 0.322416 |
| rs8352     | LPCAT1    | 5 | 1516051 | 8 | 9.109422 |
| rs8352     | LPCAT1    | 5 | 1516051 | 5 | 0.66585  |
| rs3733796  | LPCAT1    | 5 | 1547909 | 3 | 0.772867 |
| rs3733796  | LPCAT1    | 5 | 1547909 | 1 | 5.580073 |
| rs17588991 | LPCAT1    | 5 | 1554695 | 6 | 0.841236 |
| rs4975753  | IRX4      | 5 | 1933865 | 5 | 0.951779 |
| rs2962564  | LOC728878 | 5 | 2793131 | 3 | 0.623195 |
| rs2962564  | LOC728878 | 5 | 2793131 | 1 | 1.029879 |
| rs1019747  | ADAMTS16  | 5 | 5199377 | 3 | 0.640474 |
| rs1019747  | ADAMTS16  | 5 | 5199377 | 7 | 0.172697 |
| rs1019747  | ADAMTS16  | 5 | 5199377 | 6 | 1.618762 |
| rs1019747  | ADAMTS16  | 5 | 5199377 | 4 | 1.645751 |
| rs6555335  | ADAMTS16  | 5 | 5253281 | 5 | 0.100899 |
| rs2964475  | KIAA0947  | 5 | 5460814 | 1 | 4.323133 |
| rs2964475  | KIAA0947  | 5 | 5460814 | 7 | 0.255451 |
| rs3822430  | SRD5A1    | 5 | 6704970 | 1 | 3.673873 |
| rs3822430  | SRD5A1    | 5 | 6704970 | 7 | 1.165086 |
| rs2966952  | FASTKD3   | 5 | 7921030 | 8 | 5.822061 |
| rs2287779  | MTRR      | 5 | 7942216 | 1 | 5.520913 |
| rs16879334 | MTRR      | 5 | 7944506 | 1 | 3.482372 |
| rs16879334 | MTRR      | 5 | 7944506 | 7 | 0.263501 |
| rs10512963 | LOC729506 | 5 | 8511746 | 4 | 1.250901 |
| rs10512963 | LOC729506 | 5 | 8511746 | 8 | 2.437731 |
| rs9313239  | LOC729506 | 5 | 8512533 | 4 | 2.08551  |
| rs9313239  | LOC729506 | 5 | 8512533 | 5 | 4.921749 |
| rs9313239  | LOC729506 | 5 | 8512533 | 7 | 2.164439 |

|               |           |   |          |   |          |
|---------------|-----------|---|----------|---|----------|
| rs1448229     | LOC729506 | 5 | 8512661  | 5 | 0.489702 |
| rs1448229     | LOC729506 | 5 | 8512661  | 4 | 0.050575 |
| rs17235366    | SEMA5A    | 5 | 9092288  | 8 | 0.345849 |
| rs786843      | SEMA5A    | 5 | 9093141  | 8 | 4.060463 |
| rs786840      | SEMA5A    | 5 | 9094935  | 8 | 0.209874 |
| rs1806095     | SEMA5A    | 5 | 9243404  | 1 | 0.015119 |
| rs1806095     | SEMA5A    | 5 | 9243404  | 2 | 0.300658 |
| rs2438652     | LOC134145 | 5 | 10292261 | 6 | 0.079527 |
| rs2438652     | LOC134145 | 5 | 10292261 | 7 | 1.523301 |
| rs2578618     | CCT5      | 5 | 10303443 | 5 | 4.460535 |
| rs2578618     | CCT5      | 5 | 10303443 | 2 | 0.076306 |
| rs2578639     | CCT5      | 5 | 10318719 | 2 | 5.735253 |
| rs2578639     | CCT5      | 5 | 10318719 | 5 | 1.149098 |
| rs1287736     | CMBL      | 5 | 10331403 | 2 | 3.60175  |
| rs3995688     | CMBL      | 5 | 10331657 | 7 | 1.061916 |
| rs3995688     | CMBL      | 5 | 10331657 | 2 | 1.807601 |
| rs3995688     | CMBL      | 5 | 10331657 | 6 | 1.28864  |
| rs3995688     | CMBL      | 5 | 10331657 | 5 | 0.409328 |
| rs3995688     | CMBL      | 5 | 10331657 | 1 | 1.226683 |
| rs3995688     | CMBL      | 5 | 10331657 | 4 | 0.281706 |
| rs11745612    | LOC651746 | 5 | 10691180 | 3 | 1.656847 |
| rs1566622     | CTNND2    | 5 | 11026727 | 8 | 5.011913 |
| rs1566622     | CTNND2    | 5 | 11026727 | 2 | 5.443339 |
| rs1566622     | CTNND2    | 5 | 11026727 | 4 | 0.832772 |
| rs3734111     | DNAH5     | 5 | 13754525 | 6 | 1.852018 |
| rs3734111     | DNAH5     | 5 | 13754525 | 8 | 5.394551 |
| rs3734111     | DNAH5     | 5 | 13754525 | 5 | 0.214543 |
| SNP5-13770471 | DNAH5     | 5 | 13770471 | 4 | 1.624105 |
| rs30169       | DNAH5     | 5 | 13772022 | 6 | 3.068478 |
| rs30169       | DNAH5     | 5 | 13772022 | 5 | 0.267333 |
| rs30169       | DNAH5     | 5 | 13772022 | 8 | 4.828212 |
| rs30169       | DNAH5     | 5 | 13772022 | 1 | 5.547718 |
| rs30168       | DNAH5     | 5 | 13772089 | 1 | 4.555531 |
| rs30168       | DNAH5     | 5 | 13772089 | 5 | 0.698182 |
| rs30168       | DNAH5     | 5 | 13772089 | 8 | 0.310401 |
| rs30168       | DNAH5     | 5 | 13772089 | 6 | 2.55338  |
| rs17263496    | DNAH5     | 5 | 13790444 | 1 | 4.684353 |
| rs6554812     | DNAH5     | 5 | 13815972 | 7 | 0.929322 |
| rs6554812     | DNAH5     | 5 | 13815972 | 3 | 1.282213 |
| rs10513155    | DNAH5     | 5 | 13841886 | 7 | 1.518482 |
| rs10513155    | DNAH5     | 5 | 13841886 | 8 | 0.533769 |
| rs10078391    | DNAH5     | 5 | 13864775 | 8 | 0.243802 |
| rs10078391    | DNAH5     | 5 | 13864775 | 1 | 1.606633 |
| rs1348689     | DNAH5     | 5 | 13882799 | 1 | 5.0132   |
| rs1348689     | DNAH5     | 5 | 13882799 | 7 | 0.644857 |
| rs1348689     | DNAH5     | 5 | 13882799 | 5 | 0.42241  |
| rs1348689     | DNAH5     | 5 | 13882799 | 4 | 0.707784 |

|               |           |   |          |   |          |
|---------------|-----------|---|----------|---|----------|
| rs10041113    | DNAH5     | 5 | 13898045 | 7 | 0.245889 |
| rs10041113    | DNAH5     | 5 | 13898045 | 1 | 4.76128  |
| rs10041113    | DNAH5     | 5 | 13898045 | 8 | 0.091728 |
| rs10041113    | DNAH5     | 5 | 13898045 | 5 | 0.408636 |
| rs6554827     | DNAH5     | 5 | 13917728 | 3 | 1.027219 |
| rs6554827     | DNAH5     | 5 | 13917728 | 4 | 0.434209 |
| rs6554827     | DNAH5     | 5 | 13917728 | 1 | 3.307138 |
| rs7703349     | DNAH5     | 5 | 13918980 | 3 | 0.389053 |
| rs7703349     | DNAH5     | 5 | 13918980 | 1 | 2.708779 |
| rs10057007    | DNAH5     | 5 | 13935841 | 1 | 3.197486 |
| rs4701997     | DNAH5     | 5 | 13947894 | 8 | 0.249023 |
| rs4701997     | DNAH5     | 5 | 13947894 | 4 | 0.449166 |
| rs4701997     | DNAH5     | 5 | 13947894 | 1 | 3.247439 |
| rs1445823     | DNAH5     | 5 | 13953345 | 6 | 1.045909 |
| rs1445823     | DNAH5     | 5 | 13953345 | 1 | 4.123827 |
| rs1530498     | DNAH5     | 5 | 13955220 | 1 | 3.040184 |
| rs1530498     | DNAH5     | 5 | 13955220 | 5 | 0.519188 |
| rs3213936     | DNAH5     | 5 | 13966885 | 7 | 0.072897 |
| rs3213936     | DNAH5     | 5 | 13966885 | 8 | 0.217378 |
| rs3213936     | DNAH5     | 5 | 13966885 | 6 | 2.078044 |
| rs3213936     | DNAH5     | 5 | 13966885 | 1 | 4.662587 |
| rs1530496     | DNAH5     | 5 | 13984340 | 6 | 0.782548 |
| rs1530496     | DNAH5     | 5 | 13984340 | 4 | 0.379313 |
| rs1530496     | DNAH5     | 5 | 13984340 | 8 | 1.217735 |
| rs26107       | TRIO      | 5 | 14551727 | 4 | 1.147236 |
| rs25959       | FAM105A   | 5 | 14664106 | 5 | 1.310948 |
| rs31990       | LOC642954 | 5 | 14851587 | 8 | 1.048988 |
| rs31990       | LOC642954 | 5 | 14851587 | 5 | 1.591952 |
| rs31990       | LOC642954 | 5 | 14851587 | 3 | 1.831591 |
| rs31990       | LOC642954 | 5 | 14851587 | 6 | 1.465662 |
| rs31990       | LOC642954 | 5 | 14851587 | 2 | 4.118603 |
| rs31990       | LOC642954 | 5 | 14851587 | 1 | 1.667936 |
| rs3810847     | FBXL7     | 5 | 15991553 | 8 | 0.339653 |
| rs162848      | FAM134B   | 5 | 16531200 | 3 | 0.018293 |
| rs33684       | FAM134B   | 5 | 16561898 | 1 | 4.721058 |
| rs33684       | FAM134B   | 5 | 16561898 | 5 | 0.33687  |
| SNP5-16625153 | FAM134B   | 5 | 16625153 | 5 | 5.142818 |
| rs35003       | FAM134B   | 5 | 16670099 | 7 | 0.079813 |
| rs35003       | FAM134B   | 5 | 16670099 | 1 | 1.062436 |
| rs35003       | FAM134B   | 5 | 16670099 | 5 | 0.437467 |
| rs25901       | MYO10     | 5 | 16726975 | 5 | 0.697995 |
| rs25901       | MYO10     | 5 | 16726975 | 3 | 0.66155  |
| rs25901       | MYO10     | 5 | 16726975 | 7 | 4.294926 |
| rs4866303     | LOC391767 | 5 | 17667821 | 5 | 1.592315 |
| rs17285716    | CDH18     | 5 | 19626931 | 4 | 0.915187 |
| rs6451993     | CDH12     | 5 | 21787813 | 4 | 0.05991  |
| rs6451993     | CDH12     | 5 | 21787813 | 8 | 0.103959 |

|               |           |   |          |   |          |
|---------------|-----------|---|----------|---|----------|
| rs6451993     | CDH12     | 5 | 21787813 | 5 | 0.850131 |
| rs4371716     | CDH12     | 5 | 22114341 | 5 | 3.011774 |
| rs3805547     | PRDM9     | 5 | 23563764 | 1 | 1.937733 |
| rs2302903     | CDH6      | 5 | 31353286 | 5 | 2.247023 |
| rs2302903     | CDH6      | 5 | 31353286 | 2 | 1.8559   |
| rs2291109     | C5orf22   | 5 | 31568186 | 4 | 4.555293 |
| rs10066063    | PDZD2     | 5 | 32126051 | 2 | 0.760293 |
| rs10066063    | PDZD2     | 5 | 32126051 | 7 | 5.412013 |
| rs10066063    | PDZD2     | 5 | 32126051 | 5 | 4.446702 |
| rs10066063    | PDZD2     | 5 | 32126051 | 1 | 0.364185 |
| rs16889442    | PDZD2     | 5 | 32128827 | 5 | 4.163903 |
| rs16889442    | PDZD2     | 5 | 32128827 | 7 | 1.520417 |
| rs16889442    | PDZD2     | 5 | 32128827 | 1 | 1.210442 |
| rs16889442    | PDZD2     | 5 | 32128827 | 2 | 1.184114 |
| SNP5-32436023 | ZFR       | 5 | 32436023 | 1 | 4.834753 |
| SNP5-32436023 | ZFR       | 5 | 32436023 | 6 | 7.717964 |
| SNP5-32436023 | ZFR       | 5 | 32436023 | 8 | 0.201307 |
| rs10079994    | LOC340113 | 5 | 32983455 | 6 | 1.38897  |
| rs4867491     | LOC340113 | 5 | 32984837 | 5 | 1.690612 |
| rs4867491     | LOC340113 | 5 | 32984837 | 2 | 3.207702 |
| rs10941035    | LOC340113 | 5 | 32997426 | 5 | 0.061391 |
| rs17549362    | LOC728553 | 5 | 33198370 | 3 | 4.346268 |
| rs2304621     | TARS      | 5 | 33476881 | 7 | 0.680175 |
| rs2304621     | TARS      | 5 | 33476881 | 6 | 3.783039 |
| rs26722       | SLC45A2   | 5 | 33999627 | 5 | 1.487016 |
| rs34677       | AMACR     | 5 | 34034525 | 7 | 0.708226 |
| rs34677       | AMACR     | 5 | 34034525 | 4 | 1.406746 |
| rs3195676     | AMACR     | 5 | 34043857 | 5 | 1.27417  |
| rs3195676     | AMACR     | 5 | 34043857 | 3 | 0.433516 |
| rs3195676     | AMACR     | 5 | 34043857 | 1 | 4.179301 |
| rs840391      | C1QTNF3   | 5 | 34054261 | 3 | 0.120389 |
| rs840391      | C1QTNF3   | 5 | 34054261 | 5 | 3.989973 |
| rs840391      | C1QTNF3   | 5 | 34054261 | 7 | 0.398529 |
| rs840391      | C1QTNF3   | 5 | 34054261 | 1 | 5.11652  |
| rs840391      | C1QTNF3   | 5 | 34054261 | 4 | 0.711985 |
| rs840391      | C1QTNF3   | 5 | 34054261 | 8 | 0.679921 |
| rs840390      | C1QTNF3   | 5 | 34054380 | 4 | 0.123029 |
| rs840389      | C1QTNF3   | 5 | 34054441 | 1 | 4.626715 |
| rs840389      | C1QTNF3   | 5 | 34054441 | 5 | 0.58245  |
| rs840389      | C1QTNF3   | 5 | 34054441 | 3 | 0.105166 |
| rs840389      | C1QTNF3   | 5 | 34054441 | 4 | 0.130272 |
| rs840388      | C1QTNF3   | 5 | 34054647 | 3 | 0.084732 |
| rs840388      | C1QTNF3   | 5 | 34054647 | 5 | 1.17115  |
| rs840388      | C1QTNF3   | 5 | 34054647 | 4 | 0.341215 |
| rs840388      | C1QTNF3   | 5 | 34054647 | 1 | 1.904126 |
| rs840385      | C1QTNF3   | 5 | 34056115 | 8 | 0.505791 |
| rs840385      | C1QTNF3   | 5 | 34056115 | 1 | 5.405568 |

|               |          |   |          |   |          |
|---------------|----------|---|----------|---|----------|
| rs840385      | C1QTNF3  | 5 | 34056115 | 7 | 0.914507 |
| rs840385      | C1QTNF3  | 5 | 34056115 | 4 | 0.213003 |
| rs840385      | C1QTNF3  | 5 | 34056115 | 3 | 0.282476 |
| rs840385      | C1QTNF3  | 5 | 34056115 | 5 | 5.815715 |
| rs6451173     | FLJ25439 | 5 | 34876598 | 1 | 1.053384 |
| SNP5-35108469 | PRLR     | 5 | 35108469 | 1 | 4.593387 |
| rs16902381    | SPEF2    | 5 | 35694996 | 7 | 2.114839 |
| rs6891905     | SPEF2    | 5 | 35706498 | 1 | 0.174577 |
| rs7710284     | SPEF2    | 5 | 35728532 | 7 | 0.478586 |
| rs6451206     | SPEF2    | 5 | 35736355 | 1 | 5.472808 |
| SNP5-35912008 | IL7R     | 5 | 35912008 | 1 | 4.686555 |
| rs3088073     | C5orf33  | 5 | 36229764 | 2 | 1.298651 |
| rs3088073     | C5orf33  | 5 | 36229764 | 6 | 3.255718 |
| rs3088073     | C5orf33  | 5 | 36229764 | 7 | 0.049773 |
| rs3088073     | C5orf33  | 5 | 36229764 | 8 | 6.29696  |
| rs2973033     | GDNF     | 5 | 37875390 | 8 | 0.089829 |
| rs3110234     | LIFR     | 5 | 38521822 | 3 | 0.492474 |
| rs3110234     | LIFR     | 5 | 38521822 | 6 | 0.174072 |
| rs834011      | OSMR     | 5 | 38969643 | 1 | 3.843984 |
| rs1975089     | RICTOR   | 5 | 38977847 | 1 | 4.611496 |
| rs6863066     | FYB      | 5 | 39255372 | 6 | 3.885844 |
| rs1050903     | DAB2     | 5 | 39430250 | 4 | 0.329972 |
| rs1050903     | DAB2     | 5 | 39430250 | 5 | 1.087038 |
| rs1697938     | CARD6    | 5 | 40890439 | 7 | 0.661207 |
| rs1697938     | CARD6    | 5 | 40890439 | 5 | 0.697838 |
| rs1697938     | CARD6    | 5 | 40890439 | 1 | 0.213912 |
| rs1697938     | CARD6    | 5 | 40890439 | 3 | 0.021296 |
| rs13157656    | C7       | 5 | 41000609 | 6 | 1.183501 |
| rs704040      | FLJ40243 | 5 | 41033953 | 3 | 0.510997 |
| rs13174484    | FLJ40243 | 5 | 41105609 | 3 | 0.168144 |
| rs9200        | C6       | 5 | 41178363 | 1 | 1.385252 |
| rs9200        | C6       | 5 | 41178363 | 3 | 1.601672 |
| rs9200        | C6       | 5 | 41178363 | 4 | 3.078792 |
| rs7701760     | PLCXD3   | 5 | 41346492 | 5 | 1.006718 |
| rs1373639     | PLCXD3   | 5 | 41346714 | 5 | 1.227356 |
| rs11737958    | PLCXD3   | 5 | 41347921 | 5 | 1.210214 |
| rs6179        | GHR      | 5 | 42735801 | 5 | 0.516222 |
| rs6179        | GHR      | 5 | 42735801 | 7 | 0.70811  |
| rs6179        | GHR      | 5 | 42735801 | 8 | 0.687337 |
| rs6180        | GHR      | 5 | 42754996 | 7 | 2.44749  |
| rs6180        | GHR      | 5 | 42754996 | 5 | 0.491261 |
| rs6180        | GHR      | 5 | 42754996 | 2 | 1.216044 |
| rs6180        | GHR      | 5 | 42754996 | 4 | 0.290796 |
| rs6180        | GHR      | 5 | 42754996 | 1 | 0.693574 |
| rs2910875     | GHR      | 5 | 42755583 | 2 | 0.630448 |
| rs2910875     | GHR      | 5 | 42755583 | 1 | 0.362572 |
| rs2910875     | GHR      | 5 | 42755583 | 4 | 0.60125  |

|               |           |   |          |   |          |
|---------------|-----------|---|----------|---|----------|
| rs316408      | LOC644010 | 5 | 43102531 | 8 | 4.436675 |
| rs17243515    | MGC42105  | 5 | 43228178 | 1 | 3.325077 |
| rs17243515    | MGC42105  | 5 | 43228178 | 7 | 0.177307 |
| rs17302931    | MGC42105  | 5 | 43228210 | 7 | 1.553204 |
| rs17302931    | MGC42105  | 5 | 43228210 | 1 | 1.381207 |
| rs13659       | HMGCS1    | 5 | 43326457 | 6 | 0.136727 |
| rs13659       | HMGCS1    | 5 | 43326457 | 1 | 0.130391 |
| rs13659       | HMGCS1    | 5 | 43326457 | 2 | 1.43817  |
| rs13659       | HMGCS1    | 5 | 43326457 | 7 | 0.389224 |
| rs10055801    | C5orf34   | 5 | 43550753 | 2 | 0.851036 |
| rs10055801    | C5orf34   | 5 | 43550753 | 1 | 0.379656 |
| rs10055801    | C5orf34   | 5 | 43550753 | 3 | 0.159323 |
| rs11954894    | LOC642366 | 5 | 50709888 | 8 | 0.077785 |
| rs11954894    | LOC642366 | 5 | 50709888 | 7 | 2.222927 |
| rs2270756     | PELO      | 5 | 52119768 | 5 | 0.988378 |
| rs3088364     | ITGA1     | 5 | 52284785 | 4 | 0.859922 |
| rs3088364     | ITGA1     | 5 | 52284785 | 1 | 0.22539  |
| rs3088364     | ITGA1     | 5 | 52284785 | 8 | 4.656906 |
| rs3088364     | ITGA1     | 5 | 52284785 | 7 | 0.436676 |
| rs3088364     | ITGA1     | 5 | 52284785 | 6 | 2.252181 |
| rs3088364     | ITGA1     | 5 | 52284785 | 3 | 0.948669 |
| rs3088363     | ITGA1     | 5 | 52284812 | 4 | 4.420427 |
| rs3088363     | ITGA1     | 5 | 52284812 | 3 | 1.047623 |
| rs3088363     | ITGA1     | 5 | 52284812 | 2 | 1.081869 |
| rs3088363     | ITGA1     | 5 | 52284812 | 8 | 9.391233 |
| rs3088363     | ITGA1     | 5 | 52284812 | 6 | 3.106515 |
| rs3088363     | ITGA1     | 5 | 52284812 | 1 | 0.601038 |
| rs1047481     | ITGA1     | 5 | 52285233 | 2 | 1.99195  |
| rs1047481     | ITGA1     | 5 | 52285233 | 6 | 0.199688 |
| rs1047481     | ITGA1     | 5 | 52285233 | 3 | 0.448362 |
| rs1047481     | ITGA1     | 5 | 52285233 | 4 | 0.305504 |
| rs1047481     | ITGA1     | 5 | 52285233 | 8 | 3.365555 |
| rs1047481     | ITGA1     | 5 | 52285233 | 7 | 0.307278 |
| rs1047481     | ITGA1     | 5 | 52285233 | 1 | 0.325926 |
| SNP5-52433762 | MOCS2     | 5 | 52433762 | 7 | 0.124102 |
| SNP5-52433762 | MOCS2     | 5 | 52433762 | 1 | 2.156382 |
| rs722910      | FST       | 5 | 52817354 | 6 | 1.748935 |
| rs722910      | FST       | 5 | 52817354 | 8 | 0.041679 |
| rs35941       | ARL15     | 5 | 53642052 | 4 | 0.34097  |
| rs3822313     | ESM1      | 5 | 54310631 | 7 | 0.385598 |
| rs3822313     | ESM1      | 5 | 54310631 | 1 | 1.304439 |
| rs3822313     | ESM1      | 5 | 54310631 | 3 | 0.178769 |
| rs444527      | CDC20B    | 5 | 54445856 | 1 | 0.846763 |
| rs1021580     | CDC20B    | 5 | 54475223 | 3 | 0.57157  |
| rs4865953     | RNF138P1  | 5 | 54860814 | 2 | 3.37473  |
| rs4865615     | FLJ90709  | 5 | 54996430 | 2 | 4.059678 |
| rs4865615     | FLJ90709  | 5 | 54996430 | 1 | 0.60541  |

|               |               |   |          |   |          |
|---------------|---------------|---|----------|---|----------|
| rs4865615     | FLJ90709      | 5 | 54996430 | 4 | 0.372479 |
| rs4865615     | FLJ90709      | 5 | 54996430 | 6 | 0.522109 |
| rs957459      | DDX4          | 5 | 55118231 | 2 | 1.694821 |
| rs1009639     | IL31RA        | 5 | 55191159 | 8 | 0.758274 |
| rs161704      | IL31RA        | 5 | 55242201 | 1 | 0.864439 |
| rs161704      | IL31RA        | 5 | 55242201 | 6 | 0.170741 |
| rs161704      | IL31RA        | 5 | 55242201 | 2 | 0.155397 |
| rs161704      | IL31RA        | 5 | 55242201 | 7 | 1.365359 |
| rs17653152    | LOC345645     | 5 | 55607777 | 8 | 4.805573 |
| rs17653152    | LOC345645     | 5 | 55607777 | 5 | 3.344249 |
| rs17653152    | LOC345645     | 5 | 55607777 | 3 | 3.534244 |
| rs17653152    | LOC345645     | 5 | 55607777 | 6 | 1.302114 |
| rs832583      | MAP3K1        | 5 | 56213974 | 4 | 3.2787   |
| rs832546      | MAP3K1        | 5 | 56226957 | 4 | 0.92341  |
| SNP5-56269247 | MIER3         | 5 | 56269247 | 3 | 0.178698 |
| rs13159014    | DKFZp686D0972 | 5 | 56812010 | 1 | 3.502229 |
| rs11950021    | LOC728103     | 5 | 57448054 | 4 | 0.432789 |
| rs11950021    | LOC728103     | 5 | 57448054 | 7 | 0.824156 |
| rs11950021    | LOC728103     | 5 | 57448054 | 5 | 1.178388 |
| rs32613       | PLK2          | 5 | 57786024 | 2 | 5.788311 |
| rs7704785     | C5orf29       | 5 | 57826094 | 5 | 2.681907 |
| rs7704785     | C5orf29       | 5 | 57826094 | 7 | 1.580922 |
| rs7704785     | C5orf29       | 5 | 57826094 | 3 | 0.81825  |
| rs1389308     | C5orf29       | 5 | 57827068 | 7 | 0.74971  |
| rs829259      | PDE4D         | 5 | 58303733 | 8 | 5.652911 |
| rs829259      | PDE4D         | 5 | 58303733 | 7 | 0.008382 |
| rs829259      | PDE4D         | 5 | 58303733 | 5 | 0.056603 |
| rs16878354    | ELOVL7        | 5 | 60083785 | 1 | 5.752415 |
| rs13358053    | ELOVL7        | 5 | 60085334 | 3 | 0.460075 |
| rs153377      | FLJ37543      | 5 | 61037303 | 3 | 1.989747 |
| rs32170       | IPO11         | 5 | 61882830 | 1 | 0.085658 |
| rs32170       | IPO11         | 5 | 61882830 | 2 | 0.631505 |
| rs275819      | SFRS12IP1     | 5 | 64059737 | 2 | 0.457511 |
| rs275819      | SFRS12IP1     | 5 | 64059737 | 4 | 1.365627 |
| rs3756739     | SFRS12IP1     | 5 | 64100167 | 5 | 0.886002 |
| rs16893435    | ADAMTS6       | 5 | 64480678 | 6 | 0.057902 |
| GA004492      | CENPK         | 5 | 64894711 | 3 | 1.642533 |
| GA004492      | CENPK         | 5 | 64894711 | 2 | 0.780775 |
| rs28126       | NULL          | 5 | 64960826 | 3 | 0.156096 |
| rs28126       | NULL          | 5 | 64960826 | 5 | 0.24416  |
| rs28126       | NULL          | 5 | 64960826 | 4 | 0.797604 |
| rs27138       | SGTB          | 5 | 65000893 | 4 | 1.123462 |
| rs27138       | SGTB          | 5 | 65000893 | 5 | 0.854045 |
| rs27394       | SGTB          | 5 | 65001513 | 4 | 0.024871 |
| rs27394       | SGTB          | 5 | 65001513 | 3 | 0.858114 |
| rs27394       | SGTB          | 5 | 65001513 | 2 | 4.174683 |
| rs27394       | SGTB          | 5 | 65001513 | 5 | 0.234848 |



|               |           |   |          |   |          |
|---------------|-----------|---|----------|---|----------|
| rs3213837     | ERBB2IP   | 5 | 65357067 | 5 | 0.077581 |
| rs6893041     | FLJ46010  | 5 | 65649994 | 7 | 0.547377 |
| rs11955611    | LOC202227 | 5 | 65903674 | 4 | 0.825637 |
| rs5744463     | CD180     | 5 | 66528168 | 8 | 0.614559 |
| rs164572      | SLC30A5   | 5 | 68454810 | 1 | 0.118843 |
| rs1128761     | CCNB1     | 5 | 68507003 | 3 | 0.885729 |
| rs2242350     | MRPS36    | 5 | 68549355 | 5 | 0.20448  |
| rs2242350     | MRPS36    | 5 | 68549355 | 4 | 2.816833 |
| rs2242350     | MRPS36    | 5 | 68549355 | 1 | 3.24289  |
| rs2242350     | MRPS36    | 5 | 68549355 | 8 | 0.018667 |
| rs2242350     | MRPS36    | 5 | 68549355 | 7 | 0.095917 |
| rs2242350     | MRPS36    | 5 | 68549355 | 6 | 0.166453 |
| rs2972388     | CDK7      | 5 | 68567009 | 6 | 0.35026  |
| rs2972388     | CDK7      | 5 | 68567009 | 7 | 0.637881 |
| rs2972388     | CDK7      | 5 | 68567009 | 4 | 3.151468 |
| rs2972388     | CDK7      | 5 | 68567009 | 8 | 1.919974 |
| rs2972388     | CDK7      | 5 | 68567009 | 1 | 5.195529 |
| rs2972388     | CDK7      | 5 | 68567009 | 5 | 0.237572 |
| rs12651858    | CCDC125   | 5 | 68613223 | 6 | 0.322434 |
| rs4421064     | CCDC125   | 5 | 68614184 | 4 | 0.108454 |
| rs4421064     | CCDC125   | 5 | 68614184 | 5 | 0.03745  |
| rs4421064     | CCDC125   | 5 | 68614184 | 1 | 3.685278 |
| rs4421064     | CCDC125   | 5 | 68614184 | 7 | 0.308643 |
| rs28409706    | NAIP      | 5 | 70344007 | 3 | 0.931335 |
| rs3761966     | BDP1      | 5 | 70836231 | 5 | 0.080104 |
| rs3761966     | BDP1      | 5 | 70836231 | 3 | 0.330476 |
| rs3761966     | BDP1      | 5 | 70836231 | 1 | 3.168688 |
| SNP5-70842213 | BDP1      | 5 | 70842213 | 6 | 1.176524 |
| SNP5-70842213 | BDP1      | 5 | 70842213 | 5 | 0.391139 |
| SNP5-70842213 | BDP1      | 5 | 70842213 | 2 | 3.490179 |
| SNP5-70842213 | BDP1      | 5 | 70842213 | 8 | 0.592292 |
| SNP5-70842213 | BDP1      | 5 | 70842213 | 7 | 5.659716 |
| SNP5-70842213 | BDP1      | 5 | 70842213 | 1 | 0.35657  |
| rs10064079    | MCCC2     | 5 | 70980831 | 3 | 1.095198 |
| rs10064079    | MCCC2     | 5 | 70980831 | 7 | 1.52793  |
| rs10064079    | MCCC2     | 5 | 70980831 | 6 | 0.403577 |
| rs343109      | ANKRA2    | 5 | 72897122 | 4 | 4.348676 |
| rs2112159     | ANKRA2    | 5 | 72897211 | 4 | 2.678222 |
| rs343118      | UTP15     | 5 | 72912532 | 4 | 0.183759 |
| rs2973566     | RGNEF     | 5 | 73184237 | 6 | 2.732937 |
| rs2973566     | RGNEF     | 5 | 73184237 | 3 | 0.456542 |
| rs2973566     | RGNEF     | 5 | 73184237 | 2 | 0.494541 |
| rs2931423     | RGNEF     | 5 | 73199587 | 3 | 0.21732  |
| rs2931423     | RGNEF     | 5 | 73199587 | 6 | 0.159462 |
| rs11556477    | GFM2      | 5 | 74098637 | 6 | 0.565951 |
| rs6874609     | TINP1     | 5 | 74105619 | 4 | 0.32135  |
| SNP5-74145596 | KIAA0888  | 5 | 74145596 | 4 | 5.865243 |

|            |           |   |          |   |          |
|------------|-----------|---|----------|---|----------|
| rs3811986  | GCNT4     | 5 | 74360193 | 2 | 2.62448  |
| rs3811986  | GCNT4     | 5 | 74360193 | 4 | 0.367659 |
| rs3811986  | GCNT4     | 5 | 74360193 | 5 | 0.45414  |
| rs3811986  | GCNT4     | 5 | 74360193 | 6 | 0.386786 |
| rs3811986  | GCNT4     | 5 | 74360193 | 3 | 2.045526 |
| rs3811987  | GCNT4     | 5 | 74360304 | 3 | 0.620154 |
| rs3811987  | GCNT4     | 5 | 74360304 | 2 | 2.06681  |
| rs3811987  | GCNT4     | 5 | 74360304 | 6 | 3.411496 |
| rs3811987  | GCNT4     | 5 | 74360304 | 5 | 2.737229 |
| rs3811987  | GCNT4     | 5 | 74360304 | 4 | 3.509395 |
| rs3811987  | GCNT4     | 5 | 74360304 | 8 | 0.261916 |
| rs10942729 | ANKRD31   | 5 | 74400056 | 3 | 1.353203 |
| rs10942729 | ANKRD31   | 5 | 74400056 | 4 | 1.112281 |
| rs961098   | ANKRD31   | 5 | 74436142 | 3 | 0.417915 |
| rs961098   | ANKRD31   | 5 | 74436142 | 2 | 6.247796 |
| rs1422699  | ANKRD31   | 5 | 74478166 | 4 | 0.950067 |
| rs1422699  | ANKRD31   | 5 | 74478166 | 8 | 1.544014 |
| rs1422699  | ANKRD31   | 5 | 74478166 | 6 | 0.298311 |
| rs1422699  | ANKRD31   | 5 | 74478166 | 3 | 0.017224 |
| rs6888707  | ANKRD31   | 5 | 74478676 | 6 | 0.710819 |
| rs6888707  | ANKRD31   | 5 | 74478676 | 4 | 0.599171 |
| rs6888707  | ANKRD31   | 5 | 74478676 | 3 | 0.78818  |
| rs6893216  | ANKRD31   | 5 | 74478720 | 4 | 0.6184   |
| rs1422698  | ANKRD31   | 5 | 74478888 | 8 | 1.317511 |
| rs1422698  | ANKRD31   | 5 | 74478888 | 4 | 2.167477 |
| rs1422698  | ANKRD31   | 5 | 74478888 | 3 | 0.948731 |
| rs1422698  | ANKRD31   | 5 | 74478888 | 6 | 2.885092 |
| rs9332464  | LOC728780 | 5 | 74957442 | 4 | 1.732186 |
| rs34358    | LOC728780 | 5 | 75000878 | 4 | 4.82149  |
| rs34358    | LOC728780 | 5 | 75000878 | 2 | 3.091553 |
| rs34358    | LOC728780 | 5 | 75000878 | 8 | 4.971139 |
| rs10070440 | SV2C      | 5 | 75463691 | 5 | 0.404561 |
| rs2270927  | SV2C      | 5 | 75627466 | 3 | 0.244233 |
| rs2270927  | SV2C      | 5 | 75627466 | 2 | 1.723995 |
| rs2270927  | SV2C      | 5 | 75627466 | 6 | 4.744971 |
| rs1047530  | F2RL2     | 5 | 75947155 | 1 | 0.734727 |
| rs1047530  | F2RL2     | 5 | 75947155 | 5 | 0.20852  |
| rs1047530  | F2RL2     | 5 | 75947155 | 3 | 0.283736 |
| rs1047530  | F2RL2     | 5 | 75947155 | 2 | 0.087244 |
| rs1047530  | F2RL2     | 5 | 75947155 | 4 | 0.324647 |
| rs1047529  | F2RL2     | 5 | 75947220 | 3 | 0.440324 |
| rs1047529  | F2RL2     | 5 | 75947220 | 8 | 0.021378 |
| rs1047529  | F2RL2     | 5 | 75947220 | 4 | 0.299719 |
| rs1047529  | F2RL2     | 5 | 75947220 | 5 | 0.19689  |
| rs1047529  | F2RL2     | 5 | 75947220 | 1 | 0.051196 |
| rs2069693  | F2RL2     | 5 | 75947471 | 3 | 0.90023  |
| rs2069693  | F2RL2     | 5 | 75947471 | 1 | 0.309848 |

|               |           |   |          |   |          |
|---------------|-----------|---|----------|---|----------|
| rs2069693     | F2RL2     | 5 | 75947471 | 5 | 3.586912 |
| rs2069693     | F2RL2     | 5 | 75947471 | 4 | 0.159828 |
| rs2069693     | F2RL2     | 5 | 75947471 | 8 | 0.177489 |
| rs1047494     | F2RL2     | 5 | 75947743 | 1 | 0.100424 |
| rs1047494     | F2RL2     | 5 | 75947743 | 4 | 0.017537 |
| rs1047494     | F2RL2     | 5 | 75947743 | 5 | 0.720763 |
| rs2069689     | F2RL2     | 5 | 75948157 | 3 | 1.10506  |
| rs2069689     | F2RL2     | 5 | 75948157 | 1 | 0.598132 |
| rs2069689     | F2RL2     | 5 | 75948157 | 4 | 0.352626 |
| rs2069689     | F2RL2     | 5 | 75948157 | 2 | 0.003657 |
| rs2069689     | F2RL2     | 5 | 75948157 | 5 | 0.160574 |
| rs961536      | F2RL2     | 5 | 75948599 | 3 | 2.417281 |
| rs2069700     | F2RL2     | 5 | 75949759 | 4 | 1.371362 |
| rs2910819     | IQGAP2    | 5 | 75968625 | 4 | 4.867493 |
| rs2910819     | IQGAP2    | 5 | 75968625 | 2 | 4.962831 |
| rs2455230     | IQGAP2    | 5 | 75968721 | 7 | 0.793396 |
| rs2455230     | IQGAP2    | 5 | 75968721 | 2 | 4.74305  |
| rs2455230     | IQGAP2    | 5 | 75968721 | 4 | 0.065112 |
| rs2431363     | IQGAP2    | 5 | 75984406 | 6 | 1.572162 |
| rs2431363     | IQGAP2    | 5 | 75984406 | 2 | 3.868516 |
| rs2431363     | IQGAP2    | 5 | 75984406 | 7 | 0.13094  |
| rs2431363     | IQGAP2    | 5 | 75984406 | 4 | 3.155545 |
| rs34592828    | IQGAP2    | 5 | 76032665 | 2 | 5.633108 |
| rs2242991     | F2RL1     | 5 | 76150615 | 5 | 0.052118 |
| rs1529505     | F2RL1     | 5 | 76150719 | 5 | 0.659526 |
| rs1529505     | F2RL1     | 5 | 76150719 | 1 | 2.029018 |
| rs1529505     | F2RL1     | 5 | 76150719 | 3 | 0.254661 |
| rs1320308     | S100Z     | 5 | 76207008 | 7 | 0.572129 |
| SNP5-76394780 | AGGF1     | 5 | 76394780 | 1 | 5.180194 |
| SNP5-76394780 | AGGF1     | 5 | 76394780 | 7 | 0.094683 |
| SNP5-76394780 | AGGF1     | 5 | 76394780 | 4 | 2.051524 |
| rs33204       | WDR41     | 5 | 76769840 | 6 | 3.526415 |
| rs33204       | WDR41     | 5 | 76769840 | 4 | 3.570234 |
| rs33204       | WDR41     | 5 | 76769840 | 2 | 5.62613  |
| rs6453373     | AP3B1     | 5 | 77460784 | 4 | 0.178287 |
| rs4530741     | LOC728769 | 5 | 77691868 | 1 | 1.186806 |
| rs4072852     | LOC728769 | 5 | 77692056 | 1 | 0.459213 |
| rs4072852     | LOC728769 | 5 | 77692056 | 2 | 0.398546 |
| rs6874309     | SCAMP1    | 5 | 77810254 | 7 | 0.468374 |
| rs6874309     | SCAMP1    | 5 | 77810254 | 4 | 0.480059 |
| rs6874309     | SCAMP1    | 5 | 77810254 | 5 | 0.103466 |
| rs6874309     | SCAMP1    | 5 | 77810254 | 8 | 0.444126 |
| rs7704939     | ARSB      | 5 | 78109954 | 3 | 0.187043 |
| rs7704939     | ARSB      | 5 | 78109954 | 1 | 0.765777 |
| rs7704939     | ARSB      | 5 | 78109954 | 2 | 0.311291 |
| rs754566      | ARSB      | 5 | 78110674 | 1 | 5.072658 |
| rs754566      | ARSB      | 5 | 78110674 | 4 | 0.218895 |

|               |       |   |          |   |          |
|---------------|-------|---|----------|---|----------|
| rs2173012     | ARSB  | 5 | 78111916 | 4 | 0.543268 |
| rs25413       | ARSB  | 5 | 78170957 | 1 | 3.602252 |
| rs25413       | ARSB  | 5 | 78170957 | 7 | 0.664319 |
| rs25413       | ARSB  | 5 | 78170957 | 8 | 0.628895 |
| rs25414       | ARSB  | 5 | 78170997 | 2 | 2.484892 |
| rs17220759    | ARSB  | 5 | 78217179 | 4 | 0.860628 |
| rs163126      | ARSB  | 5 | 78318005 | 4 | 0.307799 |
| rs163126      | ARSB  | 5 | 78318005 | 1 | 1.089521 |
| rs163126      | ARSB  | 5 | 78318005 | 7 | 0.053421 |
| rs163126      | ARSB  | 5 | 78318005 | 2 | 0.492824 |
| rs163126      | ARSB  | 5 | 78318005 | 5 | 0.094083 |
| rs1805072     | DMGDH | 5 | 78364316 | 7 | 0.601671 |
| rs1805072     | DMGDH | 5 | 78364316 | 1 | 1.411672 |
| rs248385      | DMGDH | 5 | 78376013 | 6 | 0.173514 |
| rs248385      | DMGDH | 5 | 78376013 | 3 | 0.333174 |
| rs248385      | DMGDH | 5 | 78376013 | 2 | 2.375993 |
| rs682985      | BHMT2 | 5 | 78409187 | 3 | 0.07028  |
| rs4703772     | BHMT  | 5 | 78457791 | 3 | 0.458118 |
| rs585800      | BHMT  | 5 | 78462964 | 8 | 3.597753 |
| rs13182512    | JMY   | 5 | 78609546 | 2 | 3.865509 |
| rs13182512    | JMY   | 5 | 78609546 | 1 | 0.108687 |
| rs13182512    | JMY   | 5 | 78609546 | 6 | 0.324527 |
| SNP5-79060535 | CMYA5 | 5 | 79060535 | 4 | 6.39371  |
| SNP5-79060535 | CMYA5 | 5 | 79060535 | 5 | 0.956577 |
| SNP5-79060535 | CMYA5 | 5 | 79060535 | 1 | 3.747558 |
| SNP5-79060535 | CMYA5 | 5 | 79060535 | 6 | 3.843768 |
| SNP5-79062116 | CMYA5 | 5 | 79062116 | 4 | 9.125083 |
| SNP5-79062116 | CMYA5 | 5 | 79062116 | 1 | 5.905929 |
| SNP5-79062116 | CMYA5 | 5 | 79062116 | 5 | 9.17153  |
| SNP5-79062116 | CMYA5 | 5 | 79062116 | 6 | 1.252785 |
| rs16877141    | CMYA5 | 5 | 79065482 | 5 | 0.165078 |
| rs16877141    | CMYA5 | 5 | 79065482 | 1 | 5.150893 |
| rs16877141    | CMYA5 | 5 | 79065482 | 6 | 10.69113 |
| rs6859595     | CMYA5 | 5 | 79067128 | 5 | 0.142957 |
| rs6859595     | CMYA5 | 5 | 79067128 | 1 | 7.445355 |
| rs6859595     | CMYA5 | 5 | 79067128 | 4 | 0.008748 |
| rs6859595     | CMYA5 | 5 | 79067128 | 6 | 7.174294 |
| SNP5-79067314 | CMYA5 | 5 | 79067314 | 3 | 0.064232 |
| rs10060444    | MTX3  | 5 | 79310351 | 7 | 2.32488  |
| rs10060444    | MTX3  | 5 | 79310351 | 8 | 2.645425 |
| rs10060444    | MTX3  | 5 | 79310351 | 5 | 0.096337 |
| rs6870377     | MTX3  | 5 | 79311905 | 8 | 5.138241 |
| rs6870377     | MTX3  | 5 | 79311905 | 5 | 0.155641 |
| rs6870377     | MTX3  | 5 | 79311905 | 6 | 0.666786 |
| rs6870377     | MTX3  | 5 | 79311905 | 7 | 1.128463 |
| rs10064975    | MTX3  | 5 | 79312971 | 6 | 0.25441  |
| rs10064975    | MTX3  | 5 | 79312971 | 7 | 0.895938 |

|               |           |   |          |   |          |
|---------------|-----------|---|----------|---|----------|
| rs17196706    | MTX3      | 5 | 79313091 | 5 | 0.162134 |
| rs11738136    | LOC644936 | 5 | 79634345 | 1 | 1.002956 |
| rs1052345     | SPZ1      | 5 | 79653384 | 3 | 0.490396 |
| rs369998      | FAM151B   | 5 | 79851414 | 3 | 0.438507 |
| rs369998      | FAM151B   | 5 | 79851414 | 2 | 7.277704 |
| rs32857       | ANKRD34B  | 5 | 79891128 | 1 | 4.21991  |
| rs1805355     | MSH3      | 5 | 80001785 | 5 | 0.74839  |
| rs1805355     | MSH3      | 5 | 80001785 | 3 | 0.155476 |
| rs184967      | MSH3      | 5 | 80185737 | 5 | 6.060207 |
| rs26279       | MSH3      | 5 | 80204693 | 5 | 0.798489 |
| rs26279       | MSH3      | 5 | 80204693 | 1 | 0.121421 |
| rs26279       | MSH3      | 5 | 80204693 | 2 | 0.523294 |
| SNP5-80445282 | RASGRF2   | 5 | 80445282 | 5 | 0.161226 |
| rs10942942    | RASGRF2   | 5 | 80445485 | 5 | 0.719195 |
| rs10942942    | RASGRF2   | 5 | 80445485 | 4 | 0.843492 |
| rs2897389     | RASGRF2   | 5 | 80557673 | 6 | 1.384788 |
| rs2897389     | RASGRF2   | 5 | 80557673 | 3 | 1.443479 |
| rs2897389     | RASGRF2   | 5 | 80557673 | 5 | 1.875288 |
| rs545         | CKMT2     | 5 | 80597876 | 6 | 0.541678 |
| rs545         | CKMT2     | 5 | 80597876 | 5 | 0.379664 |
| rs545         | CKMT2     | 5 | 80597876 | 3 | 0.398425 |
| rs10052929    | ZCCHC9    | 5 | 80633761 | 1 | 2.078405 |
| rs10052929    | ZCCHC9    | 5 | 80633761 | 7 | 0.599379 |
| rs10052929    | ZCCHC9    | 5 | 80633761 | 4 | 0.761911 |
| rs10052929    | ZCCHC9    | 5 | 80633761 | 6 | 0.059693 |
| rs10052929    | ZCCHC9    | 5 | 80633761 | 3 | 0.824551 |
| rs16878594    | ZCCHC9    | 5 | 80636375 | 4 | 0.228571 |
| rs16878594    | ZCCHC9    | 5 | 80636375 | 1 | 5.102373 |
| rs16878594    | ZCCHC9    | 5 | 80636375 | 7 | 0.163313 |
| rs1864183     | ATG10     | 5 | 81584972 | 4 | 2.356726 |
| rs1864183     | ATG10     | 5 | 81584972 | 7 | 0.244522 |
| rs1864183     | ATG10     | 5 | 81584972 | 8 | 2.249103 |
| rs2270901     | FLJ41309  | 5 | 81717787 | 4 | 0.317275 |
| rs2270901     | FLJ41309  | 5 | 81717787 | 6 | 0.836155 |
| rs2270901     | FLJ41309  | 5 | 81717787 | 1 | 5.478009 |
| rs2287926     | VCAN      | 5 | 82851164 | 7 | 6.386612 |
| rs2287926     | VCAN      | 5 | 82851164 | 5 | 0.845974 |
| rs309557      | VCAN      | 5 | 82870386 | 5 | 0.519021 |
| rs309557      | VCAN      | 5 | 82870386 | 4 | 5.734586 |
| rs309557      | VCAN      | 5 | 82870386 | 1 | 0.830179 |
| rs309557      | VCAN      | 5 | 82870386 | 2 | 0.230456 |
| rs309557      | VCAN      | 5 | 82870386 | 3 | 0.711322 |
| rs160279      | VCAN      | 5 | 82871301 | 4 | 0.258649 |
| rs160279      | VCAN      | 5 | 82871301 | 1 | 0.08658  |
| rs160279      | VCAN      | 5 | 82871301 | 3 | 0.340501 |
| rs160279      | VCAN      | 5 | 82871301 | 7 | 0.481097 |
| rs160278      | VCAN      | 5 | 82871480 | 2 | 4.19892  |

|               |           |   |          |   |          |
|---------------|-----------|---|----------|---|----------|
| rs160278      | VCAN      | 5 | 82871480 | 1 | 1.217025 |
| rs160278      | VCAN      | 5 | 82871480 | 5 | 0.656166 |
| rs160278      | VCAN      | 5 | 82871480 | 3 | 1.230295 |
| rs160278      | VCAN      | 5 | 82871480 | 4 | 0.086266 |
| rs160278      | VCAN      | 5 | 82871480 | 7 | 0.763239 |
| rs2269287     | EDIL3     | 5 | 83396276 | 2 | 2.704458 |
| rs2269287     | EDIL3     | 5 | 83396276 | 7 | 0.084097 |
| rs684958      | LOC645181 | 5 | 84881644 | 7 | 5.456542 |
| rs684958      | LOC645181 | 5 | 84881644 | 3 | 5.044149 |
| rs7720113     | LOC729011 | 5 | 89269589 | 2 | 3.108153 |
| rs4873        | CETN3     | 5 | 89739397 | 1 | 0.272856 |
| rs4873        | CETN3     | 5 | 89739397 | 3 | 0.170821 |
| rs4873        | CETN3     | 5 | 89739397 | 7 | 0.322383 |
| rs4873        | CETN3     | 5 | 89739397 | 4 | 1.009797 |
| rs2303801     | POLR3G    | 5 | 89806524 | 5 | 4.227047 |
| rs2303801     | POLR3G    | 5 | 89806524 | 4 | 0.216591 |
| rs2303801     | POLR3G    | 5 | 89806524 | 8 | 3.258197 |
| rs2303801     | POLR3G    | 5 | 89806524 | 2 | 5.008393 |
| rs2303801     | POLR3G    | 5 | 89806524 | 3 | 0.632981 |
| rs950692      | GPR98     | 5 | 89979189 | 5 | 0.48886  |
| rs950692      | GPR98     | 5 | 89979189 | 1 | 4.77665  |
| rs950692      | GPR98     | 5 | 89979189 | 7 | 1.108975 |
| rs950692      | GPR98     | 5 | 89979189 | 4 | 0.627006 |
| rs2366777     | GPR98     | 5 | 89979327 | 7 | 1.552762 |
| rs2366777     | GPR98     | 5 | 89979327 | 5 | 0.263883 |
| rs2366777     | GPR98     | 5 | 89979327 | 1 | 1.460719 |
| rs2366777     | GPR98     | 5 | 89979327 | 4 | 1.163101 |
| rs2366777     | GPR98     | 5 | 89979327 | 8 | 1.937245 |
| rs2366777     | GPR98     | 5 | 89979327 | 6 | 1.349145 |
| rs2366777     | GPR98     | 5 | 89979327 | 3 | 1.530158 |
| rs2366777     | GPR98     | 5 | 89979327 | 2 | 1.110457 |
| rs17543819    | GPR98     | 5 | 89989605 | 6 | 0.078914 |
| rs17543819    | GPR98     | 5 | 89989605 | 2 | 4.404147 |
| rs17544552    | GPR98     | 5 | 90015274 | 6 | 0.839629 |
| rs17544552    | GPR98     | 5 | 90015274 | 2 | 3.239762 |
| rs4916684     | GPR98     | 5 | 90015345 | 3 | 0.345424 |
| rs4916684     | GPR98     | 5 | 90015345 | 2 | 2.602005 |
| rs4916684     | GPR98     | 5 | 90015345 | 4 | 0.150418 |
| rs4916684     | GPR98     | 5 | 90015345 | 1 | 0.935942 |
| rs4916684     | GPR98     | 5 | 90015345 | 5 | 0.212101 |
| SNP5-90015447 | GPR98     | 5 | 90015447 | 4 | 0.066439 |
| SNP5-90015447 | GPR98     | 5 | 90015447 | 5 | 4.30997  |
| SNP5-90015447 | GPR98     | 5 | 90015447 | 8 | 2.048055 |
| SNP5-90015447 | GPR98     | 5 | 90015447 | 1 | 4.008252 |
| SNP5-90015506 | GPR98     | 5 | 90015506 | 5 | 1.170894 |
| SNP5-90015506 | GPR98     | 5 | 90015506 | 4 | 0.610924 |
| SNP5-90015506 | GPR98     | 5 | 90015506 | 1 | 3.78073  |

|               |           |   |          |   |          |
|---------------|-----------|---|----------|---|----------|
| rs2366926     | GPR98     | 5 | 90024260 | 3 | 0.014008 |
| rs16876822    | GPR98     | 5 | 90025535 | 3 | 1.213005 |
| rs1878878     | GPR98     | 5 | 90026080 | 1 | 0.265079 |
| rs1878878     | GPR98     | 5 | 90026080 | 6 | 0.073819 |
| rs1878878     | GPR98     | 5 | 90026080 | 3 | 1.072998 |
| rs1878878     | GPR98     | 5 | 90026080 | 2 | 1.37917  |
| rs1878878     | GPR98     | 5 | 90026080 | 4 | 0.99575  |
| rs1878878     | GPR98     | 5 | 90026080 | 5 | 0.701091 |
| rs16869032    | GPR98     | 5 | 90052627 | 8 | 0.26912  |
| rs16869032    | GPR98     | 5 | 90052627 | 1 | 5.278711 |
| rs16869032    | GPR98     | 5 | 90052627 | 5 | 0.893107 |
| rs16869032    | GPR98     | 5 | 90052627 | 4 | 2.642548 |
| rs17624033    | GPR98     | 5 | 90077266 | 3 | 0.089299 |
| rs17624033    | GPR98     | 5 | 90077266 | 7 | 0.161425 |
| SNP5-90088045 | GPR98     | 5 | 90088045 | 3 | 1.754608 |
| SNP5-90088045 | GPR98     | 5 | 90088045 | 7 | 1.243247 |
| rs2247870     | GPR98     | 5 | 90187345 | 4 | 1.250299 |
| rs2247870     | GPR98     | 5 | 90187345 | 8 | 3.40254  |
| rs2247870     | GPR98     | 5 | 90187345 | 7 | 1.970077 |
| rs13355819    | LOC729040 | 5 | 90612035 | 3 | 0.711531 |
| rs13355819    | LOC729040 | 5 | 90612035 | 4 | 0.743618 |
| rs13355819    | LOC729040 | 5 | 90612035 | 8 | 3.649465 |
| rs867831      | LOC729040 | 5 | 90612247 | 1 | 4.180094 |
| rs17638113    | ARRDC3    | 5 | 90700781 | 8 | 4.066093 |
| rs2636        | MCTP1     | 5 | 94076243 | 1 | 0.356188 |
| rs2636        | MCTP1     | 5 | 94076243 | 2 | 3.615708 |
| rs2636        | MCTP1     | 5 | 94076243 | 6 | 6.124037 |
| rs7726891     | FAM81B    | 5 | 94775479 | 4 | 1.046113 |
| rs7726891     | FAM81B    | 5 | 94775479 | 1 | 0.968763 |
| SNP5-94775513 | FAM81B    | 5 | 94775513 | 4 | 1.269854 |
| SNP5-94781766 | FAM81B    | 5 | 94781766 | 1 | 1.881499 |
| rs10054161    | RFESD     | 5 | 95008919 | 5 | 0.565497 |
| rs10054161    | RFESD     | 5 | 95008919 | 3 | 0.897003 |
| rs4561        | GLRX      | 5 | 95178069 | 5 | 0.01704  |
| rs4561        | GLRX      | 5 | 95178069 | 2 | 3.488397 |
| rs4561        | GLRX      | 5 | 95178069 | 6 | 3.722428 |
| rs4561        | GLRX      | 5 | 95178069 | 8 | 1.736494 |
| rs4561        | GLRX      | 5 | 95178069 | 3 | 0.858969 |
| rs3797207     | LOC727938 | 5 | 95195665 | 5 | 0.037607 |
| rs3797207     | LOC727938 | 5 | 95195665 | 6 | 1.836783 |
| rs7734301     | LOC727938 | 5 | 95195755 | 2 | 2.038986 |
| rs7734301     | LOC727938 | 5 | 95195755 | 5 | 0.285732 |
| rs17085193    | C5orf27   | 5 | 95220349 | 2 | 0.487064 |
| rs17085249    | ELL2      | 5 | 95262171 | 8 | 0.654619 |
| rs17085249    | ELL2      | 5 | 95262171 | 7 | 2.947723 |
| rs17085249    | ELL2      | 5 | 95262171 | 4 | 0.850659 |
| rs17085249    | ELL2      | 5 | 95262171 | 3 | 0.851573 |

|               |           |   |          |   |          |
|---------------|-----------|---|----------|---|----------|
| rs3811942     | PCSK1     | 5 | 95754196 | 7 | 0.139375 |
| rs3811942     | PCSK1     | 5 | 95754196 | 1 | 4.550298 |
| rs6234        | PCSK1     | 5 | 95754730 | 6 | 0.923203 |
| rs6233        | PCSK1     | 5 | 95758868 | 7 | 1.068073 |
| rs6233        | PCSK1     | 5 | 95758868 | 6 | 0.248134 |
| rs6233        | PCSK1     | 5 | 95758868 | 8 | 0.062475 |
| rs6233        | PCSK1     | 5 | 95758868 | 4 | 0.209607 |
| rs6230        | PCSK1     | 5 | 95794603 | 1 | 1.739235 |
| rs6230        | PCSK1     | 5 | 95794603 | 8 | 0.710315 |
| rs7724759     | CAST      | 5 | 96102243 | 6 | 7.467356 |
| rs7724759     | CAST      | 5 | 96102243 | 3 | 2.435491 |
| rs7724759     | CAST      | 5 | 96102243 | 8 | 3.891422 |
| rs7724759     | CAST      | 5 | 96102243 | 2 | 7.419016 |
| rs754615      | CAST      | 5 | 96112090 | 5 | 0.064489 |
| rs754615      | CAST      | 5 | 96112090 | 8 | 0.866909 |
| rs754615      | CAST      | 5 | 96112090 | 2 | 3.920331 |
| rs754615      | CAST      | 5 | 96112090 | 6 | 7.053483 |
| rs754615      | CAST      | 5 | 96112090 | 3 | 0.2847   |
| rs27433       | CAST      | 5 | 96135691 | 3 | 0.155048 |
| rs27433       | CAST      | 5 | 96135691 | 4 | 5.814827 |
| rs7063        | CAST      | 5 | 96135967 | 3 | 0.011582 |
| rs7063        | CAST      | 5 | 96135967 | 8 | 1.065876 |
| rs7063        | CAST      | 5 | 96135967 | 2 | 1.251882 |
| rs7063        | CAST      | 5 | 96135967 | 5 | 0.234647 |
| rs26653       | ERAP1     | 5 | 96165006 | 3 | 0.07798  |
| rs26653       | ERAP1     | 5 | 96165006 | 7 | 0.962274 |
| rs26653       | ERAP1     | 5 | 96165006 | 4 | 4.734516 |
| SNP5-96165351 | ERAP1     | 5 | 96165351 | 1 | 0.38758  |
| SNP5-96165351 | ERAP1     | 5 | 96165351 | 5 | 0.565012 |
| SNP5-96165351 | ERAP1     | 5 | 96165351 | 2 | 0.384349 |
| rs2549796     | ERAP2     | 5 | 96271099 | 2 | 4.307969 |
| rs2549796     | ERAP2     | 5 | 96271099 | 6 | 3.906942 |
| rs2549796     | ERAP2     | 5 | 96271099 | 4 | 2.542874 |
| rs1056893     | ERAP2     | 5 | 96271195 | 4 | 2.344114 |
| rs2255546     | ERAP2     | 5 | 96274871 | 6 | 7.315008 |
| rs2255546     | ERAP2     | 5 | 96274871 | 7 | 10.18269 |
| rs2255546     | ERAP2     | 5 | 96274871 | 2 | 0.461359 |
| rs2255546     | ERAP2     | 5 | 96274871 | 4 | 3.438195 |
| rs11746232    | LNPEP     | 5 | 96389215 | 7 | 0.526075 |
| rs11746232    | LNPEP     | 5 | 96389215 | 1 | 5.127475 |
| rs11746232    | LNPEP     | 5 | 96389215 | 3 | 0.757239 |
| rs316233      | LIX1      | 5 | 96453380 | 3 | 0.067724 |
| rs2544773     | RIOK2     | 5 | 96539227 | 3 | 0.054163 |
| rs2544773     | RIOK2     | 5 | 96539227 | 7 | 0.607332 |
| rs2544773     | RIOK2     | 5 | 96539227 | 8 | 0.482831 |
| rs2544773     | RIOK2     | 5 | 96539227 | 1 | 6.976895 |
| rs979348      | LOC391813 | 5 | 97099891 | 4 | 2.240625 |



|                |           |   |           |   |          |
|----------------|-----------|---|-----------|---|----------|
| rs979348       | LOC391813 | 5 | 97099891  | 6 | 2.969624 |
| rs13541        | RGMB      | 5 | 98159405  | 4 | 7.296256 |
| rs13541        | RGMB      | 5 | 98159405  | 3 | 0.078854 |
| rs13541        | RGMB      | 5 | 98159405  | 7 | 0.552516 |
| rs13541        | RGMB      | 5 | 98159405  | 8 | 3.040111 |
| rs1428439      | ST8SIA4   | 5 | 100266700 | 7 | 0.555138 |
| rs1428439      | ST8SIA4   | 5 | 100266700 | 2 | 0.918771 |
| rs1428439      | ST8SIA4   | 5 | 100266700 | 5 | 0.896777 |
| rs1428439      | ST8SIA4   | 5 | 100266700 | 1 | 0.481795 |
| rs4703217      | SLCO4C1   | 5 | 101598390 | 5 | 0.097288 |
| rs7719298      | SLCO4C1   | 5 | 101599589 | 5 | 1.147108 |
| SNP5-101602990 | SLCO4C1   | 5 | 101602990 | 4 | 0.99166  |
| SNP5-101602990 | SLCO4C1   | 5 | 101602990 | 7 | 1.259882 |
| SNP5-101602990 | SLCO4C1   | 5 | 101602990 | 5 | 0.174404 |
| rs10479190     | SLCO4C1   | 5 | 101659689 | 2 | 1.590526 |
| rs10479190     | SLCO4C1   | 5 | 101659689 | 7 | 1.015144 |
| rs10479190     | SLCO4C1   | 5 | 101659689 | 5 | 0.900084 |
| rs249496       | PAM       | 5 | 102229489 | 5 | 0.5438   |
| rs249496       | PAM       | 5 | 102229489 | 4 | 0.296683 |
| rs249496       | PAM       | 5 | 102229489 | 7 | 1.979143 |
| rs249496       | PAM       | 5 | 102229489 | 1 | 0.631884 |
| rs249496       | PAM       | 5 | 102229489 | 8 | 0.085875 |
| rs249496       | PAM       | 5 | 102229489 | 3 | 0.690441 |
| rs249496       | PAM       | 5 | 102229489 | 2 | 1.796325 |
| rs249496       | PAM       | 5 | 102229489 | 6 | 0.277355 |
| SNP5-102922572 | NUDT12    | 5 | 102922572 | 4 | 8.733647 |
| SNP5-102922572 | NUDT12    | 5 | 102922572 | 8 | 0.078628 |
| rs34499946     | FER       | 5 | 108309808 | 7 | 0.922456 |
| rs2289277      | TSLP      | 5 | 110436966 | 5 | 2.643215 |
| rs2289277      | TSLP      | 5 | 110436966 | 3 | 0.60997  |
| rs2289277      | TSLP      | 5 | 110436966 | 8 | 4.850765 |
| rs2289277      | TSLP      | 5 | 110436966 | 6 | 8.031565 |
| rs2289278      | TSLP      | 5 | 110437047 | 6 | 5.653516 |
| rs2289278      | TSLP      | 5 | 110437047 | 4 | 1.275342 |
| rs2289278      | TSLP      | 5 | 110437047 | 8 | 0.578928 |
| rs11466749     | TSLP      | 5 | 110440484 | 4 | 1.048063 |
| rs11466749     | TSLP      | 5 | 110440484 | 6 | 0.157306 |
| rs11466750     | TSLP      | 5 | 110440793 | 4 | 2.132936 |
| rs2229995      | APC       | 5 | 112206694 | 3 | 0.325829 |
| rs33556        | DCP2      | 5 | 112340427 | 6 | 6.977204 |
| rs33556        | DCP2      | 5 | 112340427 | 4 | 0.590777 |
| rs33556        | DCP2      | 5 | 112340427 | 3 | 0.800174 |
| rs33556        | DCP2      | 5 | 112340427 | 2 | 0.199516 |
| rs17372511     | DCP2      | 5 | 112382797 | 6 | 0.792175 |
| rs17372511     | DCP2      | 5 | 112382797 | 4 | 0.270125 |
| rs17372511     | DCP2      | 5 | 112382797 | 2 | 5.495549 |
| rs7670         | DCP2      | 5 | 112384548 | 4 | 3.250845 |

|                |           |   |           |   |          |
|----------------|-----------|---|-----------|---|----------|
| rs7670         | DCP2      | 5 | 112384548 | 6 | 1.430428 |
| rs17135317     | MCC       | 5 | 112434761 | 2 | 4.951457 |
| rs17135317     | MCC       | 5 | 112434761 | 4 | 4.339831 |
| rs17135317     | MCC       | 5 | 112434761 | 6 | 3.140855 |
| rs26980        | TSSK1B    | 5 | 112797926 | 8 | 0.052861 |
| rs26980        | TSSK1B    | 5 | 112797926 | 1 | 5.613511 |
| rs2974527      | TRIM36    | 5 | 114488479 | 6 | 0.614588 |
| rs2278696      | TRIM36    | 5 | 114544129 | 1 | 0.11851  |
| rs17138632     | FLJ90650  | 5 | 115366857 | 3 | 0.172051 |
| rs10078759     | FLJ90650  | 5 | 115369537 | 4 | 0.470091 |
| rs10078759     | FLJ90650  | 5 | 115369537 | 6 | 0.383992 |
| rs1508886      | FLJ90650  | 5 | 115390047 | 3 | 1.26847  |
| rs1508886      | FLJ90650  | 5 | 115390047 | 6 | 0.799204 |
| rs1508886      | FLJ90650  | 5 | 115390047 | 1 | 1.07829  |
| rs2048220      | COMMD10   | 5 | 115497672 | 2 | 0.780137 |
| rs2048220      | COMMD10   | 5 | 115497672 | 6 | 1.039059 |
| rs17132673     | DTWD2     | 5 | 118203539 | 1 | 0.041881 |
| rs17132673     | DTWD2     | 5 | 118203539 | 5 | 0.007863 |
| rs17132673     | DTWD2     | 5 | 118203539 | 4 | 0.329711 |
| rs17132673     | DTWD2     | 5 | 118203539 | 2 | 1.13709  |
| rs17132677     | DTWD2     | 5 | 118203573 | 6 | 1.870266 |
| SNP5-118541775 | DMXL1     | 5 | 118541775 | 5 | 1.237722 |
| SNP5-118541775 | DMXL1     | 5 | 118541775 | 3 | 8.095887 |
| rs3797345      | TNFAIP8   | 5 | 118757773 | 5 | 0.765077 |
| rs25640        | HSD17B4   | 5 | 118839432 | 5 | 0.190217 |
| rs25640        | HSD17B4   | 5 | 118839432 | 6 | 0.359544 |
| rs25640        | HSD17B4   | 5 | 118839432 | 1 | 3.486793 |
| rs25640        | HSD17B4   | 5 | 118839432 | 3 | 0.183346 |
| rs2434600      | LOC340069 | 5 | 118998669 | 1 | 0.52962  |
| rs2434600      | LOC340069 | 5 | 118998669 | 7 | 0.931721 |
| SNP5-120049716 | PRR16     | 5 | 120049716 | 3 | 0.219043 |
| SNP5-120049716 | PRR16     | 5 | 120049716 | 2 | 1.683803 |
| SNP5-120049716 | PRR16     | 5 | 120049716 | 1 | 0.511218 |
| rs10069230     | PRR16     | 5 | 120050658 | 6 | 1.203831 |
| rs10069230     | PRR16     | 5 | 120050658 | 5 | 1.225932 |
| SNP5-121515868 | ZNF474    | 5 | 121515868 | 5 | 0.750491 |
| SNP5-121516405 | ZNF474    | 5 | 121516405 | 7 | 0.107934 |
| SNP5-121516405 | ZNF474    | 5 | 121516405 | 5 | 0.416194 |
| SNP5-121516405 | ZNF474    | 5 | 121516405 | 8 | 0.088536 |
| SNP5-121516405 | ZNF474    | 5 | 121516405 | 6 | 0.21716  |
| rs10070158     | SNCAIP    | 5 | 121767440 | 6 | 1.970263 |
| rs10036124     | PRDM6     | 5 | 122551474 | 6 | 0.555963 |
| rs1047437      | CCDC100   | 5 | 122713626 | 2 | 4.556426 |
| rs1047437      | CCDC100   | 5 | 122713626 | 7 | 0.146238 |
| rs1047437      | CCDC100   | 5 | 122713626 | 1 | 0.210382 |
| rs7703447      | ZNF608    | 5 | 124004866 | 8 | 2.805503 |
| rs7703447      | ZNF608    | 5 | 124004866 | 6 | 0.331442 |

|            |           |   |           |   |          |
|------------|-----------|---|-----------|---|----------|
| rs7703447  | ZNF608    | 5 | 124004866 | 7 | 1.092092 |
| rs7703447  | ZNF608    | 5 | 124004866 | 4 | 0.922722 |
| rs3812052  | MEGF10    | 5 | 126820873 | 7 | 0.827522 |
| rs3812052  | MEGF10    | 5 | 126820873 | 5 | 0.273986 |
| rs3812052  | MEGF10    | 5 | 126820873 | 1 | 0.215068 |
| rs3812052  | MEGF10    | 5 | 126820873 | 2 | 3.69667  |
| rs3756722  | MEGF10    | 5 | 126823145 | 2 | 2.078864 |
| rs3756722  | MEGF10    | 5 | 126823145 | 4 | 0.281001 |
| rs3756722  | MEGF10    | 5 | 126823145 | 5 | 0.487582 |
| rs3756722  | MEGF10    | 5 | 126823145 | 1 | 0.629977 |
| rs2898043  | MEGF10    | 5 | 126824484 | 1 | 0.529052 |
| rs182844   | LOC389322 | 5 | 126875628 | 5 | 1.700306 |
| rs182844   | LOC389322 | 5 | 126875628 | 4 | 3.380829 |
| rs182844   | LOC389322 | 5 | 126875628 | 1 | 3.303394 |
| rs182844   | LOC389322 | 5 | 126875628 | 6 | 2.241589 |
| rs182844   | LOC389322 | 5 | 126875628 | 2 | 1.995504 |
| rs182844   | LOC389322 | 5 | 126875628 | 7 | 2.564314 |
| rs1050687  | FBN2      | 5 | 127621631 | 5 | 1.193688 |
| rs7288     | FBN2      | 5 | 127621769 | 5 | 0.042493 |
| rs2577539  | SLC27A6   | 5 | 128329110 | 2 | 1.12314  |
| rs2577539  | SLC27A6   | 5 | 128329110 | 1 | 0.759561 |
| rs2577539  | SLC27A6   | 5 | 128329110 | 7 | 1.362611 |
| rs2577539  | SLC27A6   | 5 | 128329110 | 5 | 0.547501 |
| rs2577539  | SLC27A6   | 5 | 128329110 | 8 | 3.388795 |
| rs2577540  | SLC27A6   | 5 | 128329641 | 7 | 0.435577 |
| rs2577540  | SLC27A6   | 5 | 128329641 | 2 | 5.053496 |
| rs2577540  | SLC27A6   | 5 | 128329641 | 3 | 0.382596 |
| rs1047999  | SLC27A6   | 5 | 128397054 | 8 | 1.881888 |
| rs1047999  | SLC27A6   | 5 | 128397054 | 3 | 0.751541 |
| rs1047999  | SLC27A6   | 5 | 128397054 | 5 | 0.009169 |
| rs1127827  | ISOC1     | 5 | 128458656 | 1 | 1.153727 |
| rs1127827  | ISOC1     | 5 | 128458656 | 5 | 0.467555 |
| rs1127827  | ISOC1     | 5 | 128458656 | 3 | 1.257283 |
| rs11749126 | ADAMTS19  | 5 | 129067955 | 7 | 0.241925 |
| rs2015018  | CHSY-2    | 5 | 129549025 | 2 | 0.637823 |
| rs2015018  | CHSY-2    | 5 | 129549025 | 1 | 1.836956 |
| rs2015018  | CHSY-2    | 5 | 129549025 | 7 | 1.492927 |
| rs17692694 | LOC402229 | 5 | 130358366 | 1 | 3.998162 |
| rs4706009  | LYRM7     | 5 | 130563943 | 3 | 0.556891 |
| rs4706009  | LYRM7     | 5 | 130563943 | 5 | 0.345432 |
| rs3488     | CDC42SE2  | 5 | 130757514 | 3 | 0.717709 |
| rs3775998  | FNIP1     | 5 | 131007231 | 2 | 0.467577 |
| rs3775998  | FNIP1     | 5 | 131007231 | 1 | 0.178492 |
| rs26008    | FNIP1     | 5 | 131036093 | 2 | 0.343707 |
| rs25882    | CSF2      | 5 | 131439359 | 3 | 0.396488 |
| rs1007602  | PDLIM4    | 5 | 131630065 | 5 | 0.413746 |
| rs1007602  | PDLIM4    | 5 | 131630065 | 6 | 1.391773 |

|            |           |   |           |   |          |
|------------|-----------|---|-----------|---|----------|
| rs9895     | PDLIM4    | 5 | 131635841 | 8 | 7.067692 |
| rs9895     | PDLIM4    | 5 | 131635841 | 6 | 0.63722  |
| rs272867   | FLJ44796  | 5 | 131708956 | 8 | 0.739061 |
| rs272867   | FLJ44796  | 5 | 131708956 | 2 | 3.762169 |
| rs274558   | SLC22A5   | 5 | 131749073 | 2 | 3.436756 |
| rs2522050  | LOC441108 | 5 | 131824508 | 7 | 0.667709 |
| rs2706395  | LOC441108 | 5 | 131824702 | 7 | 0.027492 |
| rs960757   | IRF1      | 5 | 131854209 | 5 | 3.956641 |
| rs960757   | IRF1      | 5 | 131854209 | 8 | 0.71274  |
| rs11242115 | IRF1      | 5 | 131854312 | 7 | 4.917767 |
| rs11242115 | IRF1      | 5 | 131854312 | 8 | 0.43288  |
| rs11242115 | IRF1      | 5 | 131854312 | 2 | 3.209651 |
| rs11242115 | IRF1      | 5 | 131854312 | 5 | 4.954636 |
| rs20541    | IL13      | 5 | 132023863 | 1 | 1.866334 |
| rs1295685  | IL13      | 5 | 132024344 | 1 | 0.235569 |
| rs848      | IL13      | 5 | 132024399 | 1 | 1.158532 |
| rs11242126 | KIF3A     | 5 | 132058313 | 5 | 0.253967 |
| rs11242126 | KIF3A     | 5 | 132058313 | 2 | 0.247569 |
| rs11242126 | KIF3A     | 5 | 132058313 | 1 | 0.606002 |
| rs757537   | ANKRD43   | 5 | 132178970 | 4 | 1.690764 |
| rs708459   | LEAP2     | 5 | 132236067 | 2 | 3.622979 |
| rs708459   | LEAP2     | 5 | 132236067 | 7 | 0.341632 |
| rs3749820  | FSTL4     | 5 | 132560962 | 8 | 8.791005 |
| rs3749820  | FSTL4     | 5 | 132560962 | 7 | 1.829062 |
| rs3749819  | FSTL4     | 5 | 132561034 | 8 | 6.935664 |
| rs13183672 | FSTL4     | 5 | 132561416 | 8 | 2.395023 |
| rs13183672 | FSTL4     | 5 | 132561416 | 7 | 1.954883 |
| rs3798104  | FSTL4     | 5 | 132561920 | 8 | 0.968554 |
| rs3749817  | FSTL4     | 5 | 132562945 | 7 | 0.59733  |
| rs17683306 | FSTL4     | 5 | 132680180 | 4 | 0.832712 |
| rs17683306 | FSTL4     | 5 | 132680180 | 5 | 0.038888 |
| rs17167484 | UBE2B     | 5 | 133734893 | 3 | 0.795334 |
| rs11558540 | SAR1B     | 5 | 133984567 | 1 | 5.458805 |
| rs11558540 | SAR1B     | 5 | 133984567 | 6 | 7.700633 |
| rs1700488  | LOC389328 | 5 | 134402776 | 5 | 1.824273 |
| rs1394600  | LOC389328 | 5 | 134403217 | 5 | 1.945417 |
| rs1394600  | LOC389328 | 5 | 134403217 | 1 | 3.630306 |
| rs3733728  | H2AFY     | 5 | 134698640 | 4 | 0.045857 |
| rs12520809 | C5orf20   | 5 | 134810409 | 7 | 0.075837 |
| rs10515477 | LOC729304 | 5 | 135089231 | 5 | 1.041439 |
| rs2069885  | IL9       | 5 | 135256064 | 5 | 2.48601  |
| rs40986    | FBXL21    | 5 | 135304213 | 8 | 4.945702 |
| rs40986    | FBXL21    | 5 | 135304213 | 7 | 2.879242 |
| rs40986    | FBXL21    | 5 | 135304213 | 3 | 2.607651 |
| rs2066913  | FBXL21    | 5 | 135304713 | 5 | 0.490928 |
| rs2516561  | LECT2     | 5 | 135310614 | 5 | 3.02617  |
| rs1442     | TGFBI     | 5 | 135410888 | 7 | 0.59914  |

|            |        |   |           |   |          |
|------------|--------|---|-----------|---|----------|
| rs1442     | TGFBI  | 5 | 135410888 | 4 | 0.217006 |
| rs1442     | TGFBI  | 5 | 135410888 | 3 | 0.55064  |
| rs1442     | TGFBI  | 5 | 135410888 | 6 | 0.279755 |
| rs1442     | TGFBI  | 5 | 135410888 | 2 | 3.222816 |
| rs1133170  | TGFBI  | 5 | 135419273 | 7 | 0.465942 |
| rs1133170  | TGFBI  | 5 | 135419273 | 3 | 0.262924 |
| rs1133170  | TGFBI  | 5 | 135419273 | 2 | 6.800588 |
| rs10043215 | SPOCK1 | 5 | 136339938 | 5 | 0.847665 |
| rs10043215 | SPOCK1 | 5 | 136339938 | 7 | 1.74575  |
| rs10043215 | SPOCK1 | 5 | 136339938 | 2 | 4.813421 |
| rs1051853  | SPOCK1 | 5 | 136341700 | 8 | 3.245096 |
| rs1051853  | SPOCK1 | 5 | 136341700 | 7 | 1.132532 |
| rs1051853  | SPOCK1 | 5 | 136341700 | 3 | 0.42439  |
| rs3813314  | KLHL3  | 5 | 136982618 | 5 | 0.319264 |
| rs3813314  | KLHL3  | 5 | 136982618 | 4 | 3.050275 |
| rs3813314  | KLHL3  | 5 | 136982618 | 1 | 0.106319 |
| rs3813314  | KLHL3  | 5 | 136982618 | 3 | 0.90509  |
| rs3813314  | KLHL3  | 5 | 136982618 | 7 | 0.650772 |
| rs3813314  | KLHL3  | 5 | 136982618 | 2 | 0.343855 |
| rs3813315  | KLHL3  | 5 | 136982760 | 6 | 1.722481 |
| rs3813315  | KLHL3  | 5 | 136982760 | 3 | 2.251845 |
| rs3813315  | KLHL3  | 5 | 136982760 | 4 | 2.422638 |
| rs3813315  | KLHL3  | 5 | 136982760 | 8 | 6.155691 |
| rs3813315  | KLHL3  | 5 | 136982760 | 5 | 0.159409 |
| rs3813315  | KLHL3  | 5 | 136982760 | 7 | 1.549751 |
| rs2057680  | KLHL3  | 5 | 136984376 | 5 | 0.736008 |
| rs2057680  | KLHL3  | 5 | 136984376 | 3 | 0.105973 |
| rs2057680  | KLHL3  | 5 | 136984376 | 2 | 1.764248 |
| rs2057680  | KLHL3  | 5 | 136984376 | 7 | 0.813346 |
| rs2057680  | KLHL3  | 5 | 136984376 | 6 | 0.709189 |
| rs2057680  | KLHL3  | 5 | 136984376 | 4 | 0.066965 |
| rs7444370  | KLHL3  | 5 | 136984582 | 6 | 0.625186 |
| rs17171525 | KLHL3  | 5 | 136989465 | 1 | 1.944422 |
| rs423258   | BRD8   | 5 | 137503686 | 1 | 1.508036 |
| rs423258   | BRD8   | 5 | 137503686 | 3 | 1.556105 |
| rs10952    | GFRA3  | 5 | 137616239 | 5 | 7.045402 |
| rs10952    | GFRA3  | 5 | 137616239 | 4 | 0.403995 |
| rs10952    | GFRA3  | 5 | 137616239 | 1 | 4.594145 |
| rs10952    | GFRA3  | 5 | 137616239 | 3 | 7.535718 |
| rs10952    | GFRA3  | 5 | 137616239 | 8 | 3.850617 |
| rs3734166  | CDC25C | 5 | 137693222 | 7 | 2.893744 |
| rs6861656  | CDC25C | 5 | 137695411 | 1 | 1.036309 |
| rs6861656  | CDC25C | 5 | 137695411 | 5 | 0.97377  |
| rs10073922 | JMJD1B | 5 | 137745112 | 5 | 0.484012 |
| rs10073922 | JMJD1B | 5 | 137745112 | 3 | 1.127822 |
| rs10073922 | JMJD1B | 5 | 137745112 | 1 | 0.804869 |
| rs10073922 | JMJD1B | 5 | 137745112 | 2 | 1.142448 |

|            |           |   |           |   |          |
|------------|-----------|---|-----------|---|----------|
| rs10073922 | JMJD1B    | 5 | 137745112 | 4 | 0.589924 |
| rs4835796  | REEP2     | 5 | 137810014 | 2 | 3.56779  |
| rs4835796  | REEP2     | 5 | 137810014 | 7 | 0.170687 |
| rs4835796  | REEP2     | 5 | 137810014 | 3 | 0.054163 |
| rs3798153  | REEP2     | 5 | 137810103 | 3 | 0.127811 |
| rs3798153  | REEP2     | 5 | 137810103 | 2 | 5.206563 |
| rs3798153  | REEP2     | 5 | 137810103 | 7 | 0.20703  |
| rs1046576  | REEP2     | 5 | 137810234 | 3 | 0.566967 |
| rs288039   | LRRTM2    | 5 | 138234099 | 8 | 2.47488  |
| rs288039   | LRRTM2    | 5 | 138234099 | 3 | 0.569464 |
| rs288036   | LRRTM2    | 5 | 138238794 | 3 | 0.425897 |
| rs288036   | LRRTM2    | 5 | 138238794 | 8 | 5.617987 |
| rs1059110  | CTNNA1    | 5 | 138294445 | 8 | 0.648178 |
| rs1059110  | CTNNA1    | 5 | 138294445 | 3 | 0.5964   |
| rs17031    | CTNNA1    | 5 | 138298441 | 3 | 0.28683  |
| rs33972313 | SLC23A1   | 5 | 138743401 | 1 | 1.473031 |
| rs10063870 | LOC389333 | 5 | 138756432 | 5 | 1.185088 |
| rs10063870 | LOC389333 | 5 | 138756432 | 4 | 0.893554 |
| rs10063870 | LOC389333 | 5 | 138756432 | 8 | 1.156674 |
| rs10063870 | LOC389333 | 5 | 138756432 | 6 | 0.187357 |
| rs10063870 | LOC389333 | 5 | 138756432 | 1 | 0.932137 |
| rs10900862 | LOC202051 | 5 | 138760478 | 2 | 3.266059 |
| rs10900862 | LOC202051 | 5 | 138760478 | 6 | 4.250639 |
| rs10900862 | LOC202051 | 5 | 138760478 | 4 | 5.767057 |
| rs10900862 | LOC202051 | 5 | 138760478 | 8 | 0.380361 |
| rs10900862 | LOC202051 | 5 | 138760478 | 5 | 0.537116 |
| rs10900862 | LOC202051 | 5 | 138760478 | 1 | 1.335918 |
| rs11554776 | TMEM173   | 5 | 138841262 | 5 | 0.28145  |
| rs11554776 | TMEM173   | 5 | 138841262 | 6 | 0.931147 |
| rs187167   | LOC727793 | 5 | 139009184 | 8 | 0.297692 |
| rs187167   | LOC727793 | 5 | 139009184 | 5 | 0.095976 |
| rs356445   | CXXC5     | 5 | 139040670 | 5 | 7.519178 |
| rs17286536 | PSD2      | 5 | 139203269 | 7 | 0.395096 |
| rs11538394 | C5orf32   | 5 | 139554234 | 6 | 0.400261 |
| rs11538394 | C5orf32   | 5 | 139554234 | 3 | 0.86321  |
| rs11538394 | C5orf32   | 5 | 139554234 | 8 | 3.048146 |
| rs11538394 | C5orf32   | 5 | 139554234 | 2 | 2.89748  |
| rs4150237  | HBEGF     | 5 | 139693945 | 2 | 2.888778 |
| rs1042184  | HBEGF     | 5 | 139706145 | 3 | 3.697985 |
| rs6860077  | SLC4A9    | 5 | 139725338 | 5 | 0.431328 |
| rs6860077  | SLC4A9    | 5 | 139725338 | 7 | 0.408616 |
| rs6860077  | SLC4A9    | 5 | 139725338 | 6 | 0.11241  |
| rs6860077  | SLC4A9    | 5 | 139725338 | 2 | 2.236162 |
| rs2249213  | SRA1      | 5 | 139917330 | 7 | 0.731178 |
| rs2249213  | SRA1      | 5 | 139917330 | 4 | 3.708218 |
| rs2249213  | SRA1      | 5 | 139917330 | 6 | 4.328106 |
| rs2249213  | SRA1      | 5 | 139917330 | 1 | 6.07527  |

|                |         |   |           |   |          |
|----------------|---------|---|-----------|---|----------|
| rs2249213      | SRA1    | 5 | 139917330 | 5 | 0.011252 |
| rs2569190      | CD14    | 5 | 139993100 | 1 | 4.336496 |
| rs2569190      | CD14    | 5 | 139993100 | 7 | 4.080829 |
| rs2569190      | CD14    | 5 | 139993100 | 5 | 0.115004 |
| rs2569190      | CD14    | 5 | 139993100 | 4 | 1.739413 |
| rs17208187     | TMCO6   | 5 | 140003422 | 2 | 1.401959 |
| rs17208187     | TMCO6   | 5 | 140003422 | 1 | 0.048099 |
| rs17208187     | TMCO6   | 5 | 140003422 | 4 | 0.240926 |
| rs2286394      | WDR55   | 5 | 140028728 | 1 | 0.023598 |
| rs2286394      | WDR55   | 5 | 140028728 | 4 | 1.492399 |
| SNP5-140028891 | WDR55   | 5 | 140028891 | 6 | 6.770099 |
| GA022788       | HARS    | 5 | 140037719 | 3 | 0.156973 |
| rs3733708      | PCDHA3  | 5 | 140161918 | 5 | 0.093684 |
| rs3733708      | PCDHA3  | 5 | 140161918 | 1 | 0.833505 |
| rs3733708      | PCDHA3  | 5 | 140161918 | 7 | 0.719515 |
| rs3733708      | PCDHA3  | 5 | 140161918 | 4 | 0.400607 |
| rs3733707      | PCDHA3  | 5 | 140162076 | 5 | 0.201699 |
| rs3733707      | PCDHA3  | 5 | 140162076 | 4 | 0.077963 |
| rs3733707      | PCDHA3  | 5 | 140162076 | 1 | 1.592411 |
| rs3733707      | PCDHA3  | 5 | 140162076 | 7 | 0.863631 |
| rs1030163      | PCDHA2  | 5 | 140165316 | 5 | 0.268613 |
| rs1030163      | PCDHA2  | 5 | 140165316 | 4 | 0.005658 |
| rs1030163      | PCDHA2  | 5 | 140165316 | 1 | 1.189263 |
| rs3822346      | PCDHA4  | 5 | 140167506 | 1 | 0.181557 |
| rs3822346      | PCDHA4  | 5 | 140167506 | 2 | 1.05224  |
| rs3822346      | PCDHA4  | 5 | 140167506 | 7 | 1.757613 |
| rs3822346      | PCDHA4  | 5 | 140167506 | 5 | 1.184829 |
| rs3822346      | PCDHA4  | 5 | 140167506 | 4 | 0.964065 |
| rs192231       | PCDHA11 | 5 | 140228723 | 4 | 4.37352  |
| rs192231       | PCDHA11 | 5 | 140228723 | 7 | 0.739599 |
| rs192231       | PCDHA11 | 5 | 140228723 | 2 | 4.16254  |
| rs192231       | PCDHA11 | 5 | 140228723 | 8 | 6.889561 |
| rs192231       | PCDHA11 | 5 | 140228723 | 5 | 0.721963 |
| rs251377       | PCDHA12 | 5 | 140235976 | 4 | 1.071657 |
| rs251377       | PCDHA12 | 5 | 140235976 | 2 | 1.660245 |
| rs251377       | PCDHA12 | 5 | 140235976 | 7 | 1.393448 |
| rs251377       | PCDHA12 | 5 | 140235976 | 8 | 3.179786 |
| rs11744560     | PCDHA13 | 5 | 140242676 | 5 | 0.401054 |
| rs11744560     | PCDHA13 | 5 | 140242676 | 2 | 3.390984 |
| rs155820       | PCDHAC1 | 5 | 140287930 | 7 | 1.330169 |
| rs155360       | PCDHAC1 | 5 | 140289200 | 5 | 1.612973 |
| rs155360       | PCDHAC1 | 5 | 140289200 | 4 | 0.029403 |
| rs155808       | PCDHAC2 | 5 | 140326896 | 7 | 0.541846 |
| rs155807       | PCDHAC2 | 5 | 140327237 | 7 | 0.76892  |
| rs12153295     | PCDHAC2 | 5 | 140327582 | 5 | 0.133757 |
| rs12153295     | PCDHAC2 | 5 | 140327582 | 4 | 0.445438 |
| rs12153295     | PCDHAC2 | 5 | 140327582 | 8 | 9.339281 |

|            |         |   |           |   |          |
|------------|---------|---|-----------|---|----------|
| rs31853    | PCDHB2  | 5 | 140454940 | 8 | 3.201885 |
| rs3733699  | PCDHB3  | 5 | 140461659 | 2 | 4.542874 |
| rs3733699  | PCDHB3  | 5 | 140461659 | 4 | 5.671945 |
| rs3733699  | PCDHB3  | 5 | 140461659 | 8 | 5.561096 |
| rs6887594  | PCDHB3  | 5 | 140463561 | 3 | 1.540963 |
| rs6887594  | PCDHB3  | 5 | 140463561 | 7 | 0.614202 |
| rs3776100  | PCDHB4  | 5 | 140482361 | 3 | 0.73381  |
| rs3733697  | PCDHB4  | 5 | 140482528 | 4 | 1.192718 |
| rs3776099  | PCDHB4  | 5 | 140483025 | 8 | 3.41634  |
| rs3776099  | PCDHB4  | 5 | 140483025 | 6 | 0.021881 |
| rs3776096  | PCDHB6  | 5 | 140510713 | 3 | 1.798274 |
| rs3776096  | PCDHB6  | 5 | 140510713 | 7 | 0.540932 |
| rs17629216 | PCDHB6  | 5 | 140512593 | 3 | 0.080284 |
| rs17286891 | PCDHB7  | 5 | 140532958 | 4 | 0.657959 |
| rs17286891 | PCDHB7  | 5 | 140532958 | 2 | 4.993584 |
| rs17286891 | PCDHB7  | 5 | 140532958 | 5 | 1.124582 |
| rs17286891 | PCDHB7  | 5 | 140532958 | 8 | 0.64402  |
| rs2910313  | PCDHB7  | 5 | 140533765 | 4 | 0.648239 |
| rs2910313  | PCDHB7  | 5 | 140533765 | 3 | 0.013579 |
| rs2910313  | PCDHB7  | 5 | 140533765 | 2 | 1.271171 |
| rs3733695  | PCDHB7  | 5 | 140533848 | 4 | 2.784491 |
| rs3733695  | PCDHB7  | 5 | 140533848 | 5 | 1.647354 |
| rs6892507  | PCDHB7  | 5 | 140534992 | 5 | 0.373844 |
| rs6892507  | PCDHB7  | 5 | 140534992 | 8 | 5.844934 |
| rs6892507  | PCDHB7  | 5 | 140534992 | 4 | 2.3139   |
| rs6892507  | PCDHB7  | 5 | 140534992 | 3 | 0.799869 |
| rs6892507  | PCDHB7  | 5 | 140534992 | 7 | 0.739688 |
| rs6892507  | PCDHB7  | 5 | 140534992 | 6 | 2.202916 |
| rs2950845  | PCDHB8  | 5 | 140538396 | 8 | 6.586397 |
| rs2950845  | PCDHB8  | 5 | 140538396 | 7 | 2.545084 |
| rs2950845  | PCDHB8  | 5 | 140538396 | 6 | 1.576692 |
| rs17096961 | PCDHB8  | 5 | 140540033 | 8 | 0.08908  |
| rs17096961 | PCDHB8  | 5 | 140540033 | 5 | 0.69398  |
| rs2740584  | PCDHB16 | 5 | 140541952 | 3 | 0.960731 |
| rs2740584  | PCDHB16 | 5 | 140541952 | 6 | 0.175536 |
| rs2204704  | PCDHB16 | 5 | 140542167 | 4 | 0.019964 |
| rs2204704  | PCDHB16 | 5 | 140542167 | 3 | 0.912822 |
| rs4151695  | PCDHB16 | 5 | 140542257 | 2 | 2.707733 |
| rs4151695  | PCDHB16 | 5 | 140542257 | 4 | 1.963839 |
| rs4151695  | PCDHB16 | 5 | 140542257 | 8 | 0.788743 |
| rs10069559 | PCDHB16 | 5 | 140544845 | 4 | 0.057317 |
| rs12654953 | PCDHB9  | 5 | 140551157 | 5 | 0.026403 |
| rs12654953 | PCDHB9  | 5 | 140551157 | 7 | 0.650643 |
| rs12657056 | PCDHB9  | 5 | 140551158 | 7 | 4.111154 |
| rs3756323  | PCDHB11 | 5 | 140559542 | 5 | 1.179866 |
| rs3756323  | PCDHB11 | 5 | 140559542 | 8 | 1.720998 |
| rs3756323  | PCDHB11 | 5 | 140559542 | 4 | 1.606989 |



|                |          |   |           |   |          |
|----------------|----------|---|-----------|---|----------|
| rs917535       | PCDHB11  | 5 | 140559551 | 6 | 0.141029 |
| rs638054       | PCDHB11  | 5 | 140561694 | 3 | 0.580052 |
| rs638054       | PCDHB11  | 5 | 140561694 | 7 | 4.576405 |
| rs2910006      | PCDHB12  | 5 | 140570950 | 4 | 0.908006 |
| rs2910006      | PCDHB12  | 5 | 140570950 | 2 | 0.795439 |
| rs2910006      | PCDHB12  | 5 | 140570950 | 7 | 1.681987 |
| rs2910333      | PCDHB13  | 5 | 140576888 | 4 | 3.332072 |
| rs2910333      | PCDHB13  | 5 | 140576888 | 7 | 1.606737 |
| rs2907309      | PCDHB18  | 5 | 140594222 | 7 | 1.967344 |
| rs2907309      | PCDHB18  | 5 | 140594222 | 8 | 1.375964 |
| rs2907309      | PCDHB18  | 5 | 140594222 | 5 | 3.328719 |
| rs2907307      | PCDHB18  | 5 | 140595453 | 5 | 0.420718 |
| rs2907307      | PCDHB18  | 5 | 140595453 | 7 | 1.256071 |
| rs3749780      | SLC25A2  | 5 | 140662941 | 2 | 2.633518 |
| rs3749780      | SLC25A2  | 5 | 140662941 | 5 | 0.200966 |
| rs11952797     | SLC25A2  | 5 | 140663449 | 1 | 4.570318 |
| rs11952797     | SLC25A2  | 5 | 140663449 | 5 | 0.231817 |
| rs11952797     | SLC25A2  | 5 | 140663449 | 7 | 1.496959 |
| rs17097187     | PCDHGA1  | 5 | 140692037 | 3 | 2.302563 |
| rs17097187     | PCDHGA1  | 5 | 140692037 | 6 | 1.99111  |
| rs11575947     | PCDHGA3  | 5 | 140704019 | 3 | 0.938852 |
| rs17097231     | PCDHGB2  | 5 | 140719963 | 2 | 4.661026 |
| rs2240697      | PCDHGB3  | 5 | 140731312 | 1 | 5.704838 |
| rs2240697      | PCDHGB3  | 5 | 140731312 | 5 | 0.200887 |
| rs2240697      | PCDHGB3  | 5 | 140731312 | 7 | 0.391936 |
| rs2024141      | PCDHGA7  | 5 | 140745184 | 2 | 2.174466 |
| rs4151699      | PCDHGA8  | 5 | 140752378 | 7 | 4.369447 |
| rs4151699      | PCDHGA8  | 5 | 140752378 | 5 | 0.664751 |
| rs4151699      | PCDHGA8  | 5 | 140752378 | 4 | 0.317493 |
| rs4912606      | PCDHGA9  | 5 | 140765079 | 1 | 4.933019 |
| rs3749768      | PCDHGB6  | 5 | 140770003 | 2 | 3.038842 |
| rs17208397     | PCDHGB7  | 5 | 140778823 | 1 | 6.248883 |
| rs17208397     | PCDHGB7  | 5 | 140778823 | 5 | 0.488521 |
| rs7732160      | PCDHGA11 | 5 | 140780892 | 2 | 5.387524 |
| rs3805695      | PCDHGC3  | 5 | 140838429 | 2 | 4.572576 |
| rs2074912      | PCDHGC5  | 5 | 140850700 | 1 | 2.152168 |
| rs2074912      | PCDHGC5  | 5 | 140850700 | 5 | 0.149163 |
| rs2074912      | PCDHGC5  | 5 | 140850700 | 7 | 0.7616   |
| rs918558       | PCDHGC5  | 5 | 140851133 | 5 | 0.499538 |
| rs918558       | PCDHGC5  | 5 | 140851133 | 1 | 4.066014 |
| rs32955        | FCHSD1   | 5 | 140999497 | 2 | 7.981149 |
| rs32955        | FCHSD1   | 5 | 140999497 | 6 | 2.009791 |
| rs32956        | FCHSD1   | 5 | 141000065 | 6 | 4.512668 |
| rs41098        | FCHSD1   | 5 | 141000284 | 6 | 1.499401 |
| SNP5-141004181 | FCHSD1   | 5 | 141004181 | 4 | 0.23348  |
| rs17287002     | FCHSD1   | 5 | 141010824 | 1 | 4.12157  |
| rs3822357      | PCDH1    | 5 | 141224540 | 7 | 7.749855 |

|            |        |   |           |   |          |
|------------|--------|---|-----------|---|----------|
| rs153148   | PCDH12 | 5 | 141304807 | 7 | 1.207862 |
| rs153148   | PCDH12 | 5 | 141304807 | 6 | 1.505951 |
| rs153148   | PCDH12 | 5 | 141304807 | 1 | 0.781909 |
| rs153148   | PCDH12 | 5 | 141304807 | 5 | 0.863202 |
| rs153148   | PCDH12 | 5 | 141304807 | 3 | 0.811633 |
| rs153148   | PCDH12 | 5 | 141304807 | 8 | 0.464345 |
| rs153148   | PCDH12 | 5 | 141304807 | 4 | 1.43522  |
| rs164073   | PCDH12 | 5 | 141315425 | 2 | 0.295557 |
| rs164073   | PCDH12 | 5 | 141315425 | 8 | 0.680821 |
| rs164073   | PCDH12 | 5 | 141315425 | 5 | 0.299522 |
| rs164073   | PCDH12 | 5 | 141315425 | 7 | 0.198048 |
| rs164073   | PCDH12 | 5 | 141315425 | 4 | 0.227153 |
| rs164073   | PCDH12 | 5 | 141315425 | 1 | 0.23868  |
| rs164073   | PCDH12 | 5 | 141315425 | 6 | 0.013266 |
| rs164074   | PCDH12 | 5 | 141315468 | 5 | 0.246564 |
| rs164074   | PCDH12 | 5 | 141315468 | 2 | 2.967345 |
| rs164075   | PCDH12 | 5 | 141316448 | 7 | 0.90157  |
| rs164075   | PCDH12 | 5 | 141316448 | 3 | 1.313781 |
| rs164075   | PCDH12 | 5 | 141316448 | 2 | 1.292331 |
| rs164075   | PCDH12 | 5 | 141316448 | 8 | 2.560707 |
| rs164075   | PCDH12 | 5 | 141316448 | 4 | 1.295231 |
| rs164075   | PCDH12 | 5 | 141316448 | 1 | 0.242621 |
| rs164075   | PCDH12 | 5 | 141316448 | 5 | 4.214201 |
| rs164076   | PCDH12 | 5 | 141317310 | 6 | 0.731838 |
| rs164076   | PCDH12 | 5 | 141317310 | 4 | 0.452781 |
| rs164076   | PCDH12 | 5 | 141317310 | 3 | 0.080841 |
| rs164076   | PCDH12 | 5 | 141317310 | 5 | 0.411347 |
| rs164077   | PCDH12 | 5 | 141317409 | 2 | 0.774253 |
| rs164077   | PCDH12 | 5 | 141317409 | 1 | 1.10642  |
| rs187543   | RNF14  | 5 | 141328818 | 1 | 0.260931 |
| rs252133   | RNF14  | 5 | 141328892 | 1 | 2.199314 |
| rs252133   | RNF14  | 5 | 141328892 | 7 | 0.761912 |
| rs364287   | RNF14  | 5 | 141347991 | 1 | 5.795442 |
| rs364287   | RNF14  | 5 | 141347991 | 7 | 0.239464 |
| rs364287   | RNF14  | 5 | 141347991 | 6 | 7.080971 |
| rs33999    | FGF1   | 5 | 141953533 | 3 | 0.251493 |
| rs33999    | FGF1   | 5 | 141953533 | 2 | 1.992974 |
| rs34000    | FGF1   | 5 | 141953685 | 2 | 1.324661 |
| rs34000    | FGF1   | 5 | 141953685 | 6 | 0.098818 |
| rs34000    | FGF1   | 5 | 141953685 | 3 | 0.708802 |
| rs2278688  | FGF1   | 5 | 141954266 | 8 | 0.605973 |
| rs17099029 | FGF1   | 5 | 141954717 | 8 | 3.512228 |
| rs34002    | FGF1   | 5 | 141954756 | 2 | 5.35501  |
| rs34002    | FGF1   | 5 | 141954756 | 3 | 1.600209 |
| rs34002    | FGF1   | 5 | 141954756 | 6 | 3.217995 |
| rs187034   | KCTD16 | 5 | 143834797 | 1 | 3.614239 |
| rs187034   | KCTD16 | 5 | 143834797 | 3 | 0.016156 |

|            |           |   |           |   |          |
|------------|-----------|---|-----------|---|----------|
| rs349704   | KCTD16    | 5 | 143835224 | 1 | 3.895603 |
| rs349704   | KCTD16    | 5 | 143835224 | 3 | 0.171304 |
| rs349703   | KCTD16    | 5 | 143835275 | 1 | 3.155815 |
| rs349703   | KCTD16    | 5 | 143835275 | 3 | 0.334751 |
| rs358651   | KCTD16    | 5 | 143835799 | 1 | 2.603361 |
| rs349701   | KCTD16    | 5 | 143835846 | 3 | 0.045862 |
| rs349701   | KCTD16    | 5 | 143835846 | 1 | 0.776113 |
| rs349700   | KCTD16    | 5 | 143836108 | 8 | 0.206258 |
| rs349700   | KCTD16    | 5 | 143836108 | 1 | 3.53634  |
| rs349700   | KCTD16    | 5 | 143836108 | 3 | 0.067617 |
| rs349698   | KCTD16    | 5 | 143836721 | 1 | 3.158065 |
| rs349698   | KCTD16    | 5 | 143836721 | 8 | 0.659096 |
| rs349698   | KCTD16    | 5 | 143836721 | 3 | 1.149156 |
| rs2569006  | LOC643226 | 5 | 145226278 | 5 | 0.399052 |
| rs2569006  | LOC643226 | 5 | 145226278 | 3 | 0.389023 |
| rs2569006  | LOC643226 | 5 | 145226278 | 1 | 0.515617 |
| rs6877277  | PLAC8L1   | 5 | 145458048 | 6 | 0.792285 |
| rs6877277  | PLAC8L1   | 5 | 145458048 | 4 | 1.842486 |
| rs6877277  | PLAC8L1   | 5 | 145458048 | 1 | 4.12885  |
| rs6877277  | PLAC8L1   | 5 | 145458048 | 7 | 1.719999 |
| rs12187913 | PLAC8L1   | 5 | 145464037 | 6 | 0.266393 |
| rs12187913 | PLAC8L1   | 5 | 145464037 | 1 | 4.825839 |
| rs12187913 | PLAC8L1   | 5 | 145464037 | 4 | 0.41037  |
| rs11954297 | RBM27     | 5 | 145648491 | 4 | 7.002314 |
| rs11954297 | RBM27     | 5 | 145648491 | 7 | 0.265908 |
| rs11954297 | RBM27     | 5 | 145648491 | 1 | 4.101001 |
| rs11954297 | RBM27     | 5 | 145648491 | 6 | 6.144507 |
| rs4705103  | TCERG1    | 5 | 145870221 | 1 | 2.554643 |
| rs4705103  | TCERG1    | 5 | 145870221 | 3 | 0.0131   |
| rs7709485  | GPR151    | 5 | 145875089 | 4 | 0.708377 |
| rs7709485  | GPR151    | 5 | 145875089 | 3 | 0.460774 |
| rs7709485  | GPR151    | 5 | 145875089 | 2 | 4.086778 |
| rs4705132  | STK32A    | 5 | 146599399 | 1 | 3.621735 |
| rs4705132  | STK32A    | 5 | 146599399 | 7 | 0.545315 |
| rs4705132  | STK32A    | 5 | 146599399 | 6 | 0.098111 |
| rs4705132  | STK32A    | 5 | 146599399 | 3 | 2.917453 |
| rs2116766  | JAKMIP2   | 5 | 147004669 | 7 | 1.856314 |
| rs2116765  | JAKMIP2   | 5 | 147004702 | 3 | 0.801598 |
| rs11319    | SPINK1    | 5 | 147184385 | 5 | 0.19162  |
| rs11956228 | MGC23985  | 5 | 147261501 | 7 | 0.617673 |
| rs7722926  | MGC23985  | 5 | 147266206 | 7 | 1.763754 |
| rs6892205  | SPINK5    | 5 | 147455579 | 5 | 1.689853 |
| rs6892205  | SPINK5    | 5 | 147455579 | 3 | 1.852299 |
| rs34482796 | SPINK5    | 5 | 147457744 | 5 | 0.650219 |
| rs34482796 | SPINK5    | 5 | 147457744 | 6 | 0.030744 |
| rs34482796 | SPINK5    | 5 | 147457744 | 3 | 1.046623 |
| rs2303063  | SPINK5    | 5 | 147460220 | 3 | 0.338631 |

|                |          |   |           |   |          |
|----------------|----------|---|-----------|---|----------|
| rs2303063      | SPINK5   | 5 | 147460220 | 6 | 0.612261 |
| rs2303063      | SPINK5   | 5 | 147460220 | 5 | 0.185258 |
| rs33920397     | SPINK5   | 5 | 147479863 | 4 | 1.373084 |
| rs33920397     | SPINK5   | 5 | 147479863 | 5 | 1.431464 |
| rs1042711      | ADRB2    | 5 | 148186541 | 3 | 0.527321 |
| rs1042711      | ADRB2    | 5 | 148186541 | 1 | 4.395228 |
| rs1042711      | ADRB2    | 5 | 148186541 | 8 | 0.873138 |
| rs1042717      | ADRB2    | 5 | 148186839 | 7 | 0.666804 |
| rs2217638      | SH3TC2   | 5 | 148344548 | 8 | 0.29645  |
| rs4560536      | SH3TC2   | 5 | 148344894 | 8 | 0.260692 |
| rs4560536      | SH3TC2   | 5 | 148344894 | 4 | 0.871535 |
| rs4560536      | SH3TC2   | 5 | 148344894 | 6 | 0.616884 |
| rs10040798     | SH3TC2   | 5 | 148347517 | 8 | 3.957342 |
| rs4705303      | SH3TC2   | 5 | 148347836 | 8 | 0.59555  |
| rs4705303      | SH3TC2   | 5 | 148347836 | 4 | 1.110963 |
| rs4562031      | SH3TC2   | 5 | 148348644 | 8 | 0.876576 |
| rs891919       | SH3TC2   | 5 | 148349701 | 2 | 3.839196 |
| rs891919       | SH3TC2   | 5 | 148349701 | 4 | 0.719365 |
| rs891919       | SH3TC2   | 5 | 148349701 | 8 | 5.164049 |
| rs891919       | SH3TC2   | 5 | 148349701 | 6 | 0.150286 |
| rs17109198     | SH3TC2   | 5 | 148349905 | 8 | 0.560929 |
| rs2069087      | SH3TC2   | 5 | 148353347 | 6 | 7.147709 |
| rs1347130      | SH3TC2   | 5 | 148357175 | 8 | 3.605756 |
| rs1347130      | SH3TC2   | 5 | 148357175 | 6 | 6.367854 |
| rs1347130      | SH3TC2   | 5 | 148357175 | 4 | 0.752638 |
| rs17109208     | SH3TC2   | 5 | 148358668 | 8 | 6.989445 |
| rs6885467      | SH3TC2   | 5 | 148359748 | 4 | 0.620648 |
| rs6885467      | SH3TC2   | 5 | 148359748 | 2 | 0.273107 |
| rs998304       | SH3TC2   | 5 | 148362558 | 8 | 0.966073 |
| rs6875902      | SH3TC2   | 5 | 148388086 | 8 | 1.728118 |
| rs17722293     | SH3TC2   | 5 | 148402467 | 6 | 4.030449 |
| rs4705336      | PCYOX1L  | 5 | 148728095 | 5 | 7.440279 |
| rs4705336      | PCYOX1L  | 5 | 148728095 | 8 | 0.187691 |
| rs4705336      | PCYOX1L  | 5 | 148728095 | 1 | 0.59621  |
| rs4705336      | PCYOX1L  | 5 | 148728095 | 2 | 0.480197 |
| rs2400891      | FLJ41603 | 5 | 148969315 | 5 | 0.373661 |
| rs2400891      | FLJ41603 | 5 | 148969315 | 2 | 1.494471 |
| rs2400891      | FLJ41603 | 5 | 148969315 | 8 | 1.014045 |
| rs2400891      | FLJ41603 | 5 | 148969315 | 1 | 1.258941 |
| rs2400891      | FLJ41603 | 5 | 148969315 | 6 | 1.114457 |
| rs2400891      | FLJ41603 | 5 | 148969315 | 3 | 1.394207 |
| SNP5-148983820 | FLJ41603 | 5 | 148983820 | 7 | 0.188722 |
| rs9324624      | FLJ41603 | 5 | 148986833 | 2 | 9.504594 |
| rs9324624      | FLJ41603 | 5 | 148986833 | 4 | 0.75502  |
| rs9324624      | FLJ41603 | 5 | 148986833 | 6 | 0.240552 |
| rs9324624      | FLJ41603 | 5 | 148986833 | 5 | 0.887572 |
| rs9324624      | FLJ41603 | 5 | 148986833 | 7 | 1.079466 |

|                |          |   |           |   |          |
|----------------|----------|---|-----------|---|----------|
| rs9324624      | FLJ41603 | 5 | 148986833 | 3 | 0.406419 |
| rs9324624      | FLJ41603 | 5 | 148986833 | 1 | 0.66976  |
| rs2279134      | FLJ41603 | 5 | 148992244 | 1 | 0.404856 |
| rs2279134      | FLJ41603 | 5 | 148992244 | 6 | 2.861435 |
| rs2279134      | FLJ41603 | 5 | 148992244 | 8 | 0.65912  |
| rs2279134      | FLJ41603 | 5 | 148992244 | 2 | 0.497683 |
| rs2279134      | FLJ41603 | 5 | 148992244 | 5 | 3.743855 |
| rs2279134      | FLJ41603 | 5 | 148992244 | 4 | 0.381604 |
| rs2279134      | FLJ41603 | 5 | 148992244 | 3 | 0.035105 |
| rs32588        | PPARGC1B | 5 | 149180236 | 2 | 3.716182 |
| rs32588        | PPARGC1B | 5 | 149180236 | 6 | 0.574418 |
| rs32588        | PPARGC1B | 5 | 149180236 | 7 | 0.564457 |
| rs32588        | PPARGC1B | 5 | 149180236 | 1 | 0.006368 |
| rs17572019     | PPARGC1B | 5 | 149192664 | 5 | 0.053171 |
| rs17572019     | PPARGC1B | 5 | 149192664 | 8 | 3.978895 |
| rs11959820     | PPARGC1B | 5 | 149192703 | 7 | 0.702437 |
| rs32577        | PPARGC1B | 5 | 149192993 | 7 | 0.325696 |
| rs32577        | PPARGC1B | 5 | 149192993 | 2 | 0.812413 |
| rs32577        | PPARGC1B | 5 | 149192993 | 1 | 0.207872 |
| rs2277925      | PDE6A    | 5 | 149304099 | 5 | 2.420038 |
| rs10875553     | TIGD6    | 5 | 149355125 | 3 | 0.445061 |
| rs10875553     | TIGD6    | 5 | 149355125 | 8 | 7.133686 |
| rs10875553     | TIGD6    | 5 | 149355125 | 1 | 3.053366 |
| rs3828609      | CSF1R    | 5 | 149413056 | 6 | 1.133288 |
| rs13117        | CSF1R    | 5 | 149413313 | 7 | 0.730608 |
| rs13117        | CSF1R    | 5 | 149413313 | 2 | 2.556773 |
| rs13117        | CSF1R    | 5 | 149413313 | 6 | 0.131481 |
| SNP5-149430020 | CSF1R    | 5 | 149430020 | 8 | 2.072401 |
| rs10079250     | CSF1R    | 5 | 149430325 | 7 | 0.628579 |
| rs2228422      | CSF1R    | 5 | 149437871 | 7 | 0.094014 |
| rs2228422      | CSF1R    | 5 | 149437871 | 8 | 0.113333 |
| rs2228422      | CSF1R    | 5 | 149437871 | 3 | 0.509581 |
| rs216123       | CSF1R    | 5 | 149440746 | 8 | 1.50277  |
| rs216123       | CSF1R    | 5 | 149440746 | 7 | 1.176953 |
| rs216123       | CSF1R    | 5 | 149440746 | 2 | 0.405728 |
| rs216123       | CSF1R    | 5 | 149440746 | 3 | 0.20934  |
| rs216123       | CSF1R    | 5 | 149440746 | 4 | 0.792943 |
| rs2240793      | SLC6A7   | 5 | 149563493 | 6 | 1.305101 |
| rs2240793      | SLC6A7   | 5 | 149563493 | 2 | 1.770645 |
| rs2240794      | SLC6A7   | 5 | 149563529 | 2 | 6.570107 |
| rs2240794      | SLC6A7   | 5 | 149563529 | 8 | 0.103845 |
| rs2240794      | SLC6A7   | 5 | 149563529 | 6 | 0.783373 |
| rs2240795      | SLC6A7   | 5 | 149569840 | 7 | 0.769289 |
| rs13153325     | SLC6A7   | 5 | 149570326 | 1 | 0.604131 |
| rs13153325     | SLC6A7   | 5 | 149570326 | 7 | 0.243723 |
| rs7713638      | TCOF1    | 5 | 149739289 | 4 | 0.936629 |
| rs7713638      | TCOF1    | 5 | 149739289 | 7 | 0.874975 |

|                |           |   |           |   |          |
|----------------|-----------|---|-----------|---|----------|
| rs2273232      | NDST1     | 5 | 149892720 | 3 | 0.750941 |
| rs6863809      | NDST1     | 5 | 149914306 | 6 | 1.579569 |
| rs11954652     | DCTN4     | 5 | 150078076 | 3 | 0.707695 |
| rs11548        | GPX3      | 5 | 150387976 | 3 | 1.519254 |
| rs2233290      | TNIP1     | 5 | 150416696 | 3 | 0.150179 |
| rs1133202      | ANXA6     | 5 | 150469583 | 1 | 0.45891  |
| rs2228458      | ANXA6     | 5 | 150499181 | 5 | 2.821007 |
| rs2228458      | ANXA6     | 5 | 150499181 | 3 | 0.607601 |
| rs2228458      | ANXA6     | 5 | 150499181 | 1 | 1.38245  |
| rs248427       | CCDC69    | 5 | 150545201 | 6 | 5.016304 |
| rs248427       | CCDC69    | 5 | 150545201 | 4 | 3.35849  |
| SNP5-150627081 | GM2A      | 5 | 150627081 | 5 | 3.486495 |
| SNP5-150627081 | GM2A      | 5 | 150627081 | 2 | 3.16761  |
| SNP5-150627081 | GM2A      | 5 | 150627081 | 1 | 3.450934 |
| SNP5-150627081 | GM2A      | 5 | 150627081 | 6 | 3.924047 |
| SNP5-150627081 | GM2A      | 5 | 150627081 | 3 | 2.866333 |
| SNP5-150627081 | GM2A      | 5 | 150627081 | 4 | 10.7952  |
| rs11167542     | LOC402233 | 5 | 150740475 | 2 | 1.799529 |
| rs11167542     | LOC402233 | 5 | 150740475 | 5 | 1.889845 |
| rs11167542     | LOC402233 | 5 | 150740475 | 6 | 0.97073  |
| rs165323       | SLC36A1   | 5 | 150852105 | 4 | 0.31808  |
| rs165342       | FAT2      | 5 | 150864986 | 8 | 4.289435 |
| rs165342       | FAT2      | 5 | 150864986 | 4 | 0.47182  |
| rs165341       | FAT2      | 5 | 150865032 | 4 | 0.170623 |
| rs165341       | FAT2      | 5 | 150865032 | 8 | 5.689437 |
| rs165341       | FAT2      | 5 | 150865032 | 2 | 2.963445 |
| rs2304029      | FAT2      | 5 | 150871965 | 3 | 0.221278 |
| rs3734047      | FAT2      | 5 | 150881790 | 7 | 0.337136 |
| rs3734047      | FAT2      | 5 | 150881790 | 5 | 0.3887   |
| rs3734049      | FAT2      | 5 | 150881823 | 7 | 0.265872 |
| rs3734049      | FAT2      | 5 | 150881823 | 5 | 0.010968 |
| rs2304024      | FAT2      | 5 | 150889006 | 5 | 5.196482 |
| rs1432643      | FAT2      | 5 | 150894377 | 8 | 4.228434 |
| rs1432643      | FAT2      | 5 | 150894377 | 3 | 0.077741 |
| rs1432643      | FAT2      | 5 | 150894377 | 2 | 5.117976 |
| rs998076       | FAT2      | 5 | 150904962 | 7 | 0.697573 |
| rs3549         | SPARC     | 5 | 151021343 | 2 | 2.734582 |
| rs3549         | SPARC     | 5 | 151021343 | 3 | 0.976386 |
| rs3549         | SPARC     | 5 | 151021343 | 4 | 3.241084 |
| rs1054204      | SPARC     | 5 | 151022743 | 1 | 0.140676 |
| rs1054204      | SPARC     | 5 | 151022743 | 4 | 0.94886  |
| rs1054204      | SPARC     | 5 | 151022743 | 2 | 1.381932 |
| rs1054204      | SPARC     | 5 | 151022743 | 3 | 0.121702 |
| rs1054204      | SPARC     | 5 | 151022743 | 6 | 0.02253  |
| rs982716       | NMUR2     | 5 | 151751549 | 4 | 3.45922  |
| rs982716       | NMUR2     | 5 | 151751549 | 3 | 3.691182 |
| rs4958303      | NMUR2     | 5 | 151751866 | 4 | 4.225041 |

|            |         |   |           |   |          |
|------------|---------|---|-----------|---|----------|
| rs4958303  | NMUR2   | 5 | 151751866 | 3 | 4.240173 |
| rs4958532  | NMUR2   | 5 | 151752045 | 3 | 5.080153 |
| rs4958532  | NMUR2   | 5 | 151752045 | 4 | 2.127999 |
| rs1895245  | NMUR2   | 5 | 151752248 | 3 | 2.859332 |
| rs478020   | MFAP3   | 5 | 153409362 | 7 | 1.174531 |
| rs478020   | MFAP3   | 5 | 153409362 | 2 | 3.630205 |
| rs478020   | MFAP3   | 5 | 153409362 | 4 | 0.478928 |
| rs17535045 | MFAP3   | 5 | 153413749 | 1 | 5.803039 |
| rs17535045 | MFAP3   | 5 | 153413749 | 7 | 0.648362 |
| rs4958733  | GALNT10 | 5 | 153763780 | 5 | 0.236869 |
| rs4958733  | GALNT10 | 5 | 153763780 | 6 | 0.716832 |
| rs4958733  | GALNT10 | 5 | 153763780 | 7 | 0.678077 |
| rs4958733  | GALNT10 | 5 | 153763780 | 2 | 2.236962 |
| rs4958733  | GALNT10 | 5 | 153763780 | 8 | 1.00418  |
| rs6580076  | GALNT10 | 5 | 153763946 | 4 | 4.616741 |
| rs6580076  | GALNT10 | 5 | 153763946 | 1 | 0.301183 |
| rs6580076  | GALNT10 | 5 | 153763946 | 8 | 0.417228 |
| rs888979   | GALNT10 | 5 | 153777068 | 5 | 0.969236 |
| rs888979   | GALNT10 | 5 | 153777068 | 8 | 3.779418 |
| rs888979   | GALNT10 | 5 | 153777068 | 1 | 4.930996 |
| rs888979   | GALNT10 | 5 | 153777068 | 4 | 4.631357 |
| rs3776997  | GALNT10 | 5 | 153777300 | 3 | 0.104296 |
| rs3822711  | GALNT10 | 5 | 153777488 | 1 | 5.31198  |
| rs3822711  | GALNT10 | 5 | 153777488 | 7 | 4.425791 |
| rs3172941  | GALNT10 | 5 | 153778073 | 7 | 0.169751 |
| rs3172941  | GALNT10 | 5 | 153778073 | 1 | 0.410724 |
| rs3172941  | GALNT10 | 5 | 153778073 | 6 | 5.805071 |
| rs3172941  | GALNT10 | 5 | 153778073 | 4 | 4.625449 |
| rs3172941  | GALNT10 | 5 | 153778073 | 5 | 5.054381 |
| rs3172941  | GALNT10 | 5 | 153778073 | 2 | 0.308239 |
| rs10796    | GALNT10 | 5 | 153778561 | 5 | 0.25274  |
| rs10796    | GALNT10 | 5 | 153778561 | 4 | 1.167237 |
| rs10796    | GALNT10 | 5 | 153778561 | 2 | 4.757256 |
| rs3867430  | C5orf4  | 5 | 154180805 | 5 | 0.150068 |
| rs3867430  | C5orf4  | 5 | 154180805 | 8 | 0.247604 |
| rs3867430  | C5orf4  | 5 | 154180805 | 3 | 0.254022 |
| rs3867430  | C5orf4  | 5 | 154180805 | 6 | 0.544839 |
| rs3867430  | C5orf4  | 5 | 154180805 | 4 | 0.385091 |
| rs6865950  | GEMIN5  | 5 | 154255979 | 2 | 5.206022 |
| rs3857412  | SGCD    | 5 | 156119760 | 5 | 0.871275 |
| rs284445   | SGCD    | 5 | 156120506 | 4 | 0.353874 |
| rs284445   | SGCD    | 5 | 156120506 | 1 | 2.249686 |
| rs284445   | SGCD    | 5 | 156120506 | 2 | 0.601892 |
| rs284445   | SGCD    | 5 | 156120506 | 8 | 0.153562 |
| rs1389818  | SGCD    | 5 | 156120597 | 5 | 1.074177 |
| rs10041876 | SGCD    | 5 | 156123374 | 5 | 0.315001 |
| rs1845479  | SGCD    | 5 | 156123792 | 5 | 0.116809 |

|                |          |   |           |   |          |
|----------------|----------|---|-----------|---|----------|
| rs3913482      | SGCD     | 5 | 156124093 | 5 | 0.673926 |
| rs12522248     | HAVCR1   | 5 | 156412004 | 1 | 2.961104 |
| rs1553316      | HAVCR1   | 5 | 156412087 | 6 | 0.438145 |
| rs1553316      | HAVCR1   | 5 | 156412087 | 4 | 0.508324 |
| rs9313439      | HAVCR2   | 5 | 156445760 | 4 | 0.601041 |
| rs9313439      | HAVCR2   | 5 | 156445760 | 8 | 0.756726 |
| rs9313439      | HAVCR2   | 5 | 156445760 | 6 | 0.732869 |
| rs27988        | ITK      | 5 | 156613263 | 3 | 2.878927 |
| rs7715719      | C5orf40  | 5 | 156702246 | 5 | 0.082627 |
| rs7715719      | C5orf40  | 5 | 156702246 | 1 | 1.088936 |
| rs7715719      | C5orf40  | 5 | 156702246 | 6 | 0.044188 |
| rs7715719      | C5orf40  | 5 | 156702246 | 4 | 0.242487 |
| rs7715719      | C5orf40  | 5 | 156702246 | 2 | 0.29015  |
| rs7715719      | C5orf40  | 5 | 156702246 | 7 | 0.233494 |
| rs10037485     | C5orf40  | 5 | 156702711 | 2 | 0.245505 |
| rs10037485     | C5orf40  | 5 | 156702711 | 1 | 0.839598 |
| rs10037485     | C5orf40  | 5 | 156702711 | 7 | 0.273898 |
| rs10037485     | C5orf40  | 5 | 156702711 | 4 | 1.487598 |
| rs10214194     | C5orf40  | 5 | 156702787 | 5 | 0.324098 |
| rs6860507      | ICHTHYIN | 5 | 156831268 | 7 | 1.102757 |
| rs6860507      | ICHTHYIN | 5 | 156831268 | 1 | 0.97774  |
| SNP5-156832503 | ICHTHYIN | 5 | 156832503 | 8 | 7.54426  |
| rs3822692      | ICHTHYIN | 5 | 156833456 | 1 | 0.658029 |
| rs3822692      | ICHTHYIN | 5 | 156833456 | 4 | 1.031199 |
| rs3822692      | ICHTHYIN | 5 | 156833456 | 2 | 2.5849   |
| rs3822692      | ICHTHYIN | 5 | 156833456 | 5 | 0.916705 |
| rs10404        | ADAM19   | 5 | 156837211 | 6 | 5.411883 |
| rs10404        | ADAM19   | 5 | 156837211 | 1 | 4.866078 |
| rs11466822     | ADAM19   | 5 | 156838095 | 7 | 0.680913 |
| rs11466822     | ADAM19   | 5 | 156838095 | 1 | 2.385123 |
| rs11466822     | ADAM19   | 5 | 156838095 | 5 | 1.910987 |
| rs6895849      | ADAM19   | 5 | 156839397 | 8 | 0.081174 |
| rs3822585      | ADAM19   | 5 | 156839564 | 2 | 0.177551 |
| rs11466816     | ADAM19   | 5 | 156839688 | 7 | 1.241238 |
| rs11466816     | ADAM19   | 5 | 156839688 | 6 | 1.464474 |
| rs11466816     | ADAM19   | 5 | 156839688 | 5 | 0.327531 |
| rs11466816     | ADAM19   | 5 | 156839688 | 2 | 3.806566 |
| rs11466815     | ADAM19   | 5 | 156839749 | 5 | 0.810356 |
| rs11466815     | ADAM19   | 5 | 156839749 | 7 | 0.581864 |
| rs10067096     | ADAM19   | 5 | 156849918 | 7 | 0.073356 |
| rs10067096     | ADAM19   | 5 | 156849918 | 5 | 0.254777 |
| rs3749797      | SOX30    | 5 | 157011053 | 1 | 0.08418  |
| rs2270819      | THG1L    | 5 | 157090992 | 3 | 0.048231 |
| rs2270819      | THG1L    | 5 | 157090992 | 5 | 0.161483 |
| rs2270819      | THG1L    | 5 | 157090992 | 2 | 2.802446 |
| rs2270819      | THG1L    | 5 | 157090992 | 1 | 0.113938 |
| rs2270818      | THG1L    | 5 | 157091017 | 1 | 0.434195 |



|                |         |   |           |   |          |
|----------------|---------|---|-----------|---|----------|
| rs2270818      | THG1L   | 5 | 157091017 | 2 | 0.6221   |
| rs2270818      | THG1L   | 5 | 157091017 | 3 | 0.947278 |
| rs2270818      | THG1L   | 5 | 157091017 | 5 | 0.227766 |
| rs2270817      | THG1L   | 5 | 157091131 | 3 | 0.329702 |
| rs2270817      | THG1L   | 5 | 157091131 | 7 | 4.010381 |
| rs2279770      | LSM11   | 5 | 157116317 | 2 | 1.19002  |
| rs2279770      | LSM11   | 5 | 157116317 | 5 | 0.501324 |
| rs2279770      | LSM11   | 5 | 157116317 | 7 | 0.800238 |
| rs2279770      | LSM11   | 5 | 157116317 | 1 | 0.886935 |
| rs3212227      | IL12B   | 5 | 158675528 | 3 | 0.301344 |
| rs3213120      | IL12B   | 5 | 158675686 | 4 | 0.121869 |
| rs3213119      | IL12B   | 5 | 158676366 | 4 | 0.228167 |
| rs3729604      | ADRA1B  | 5 | 159277039 | 5 | 6.535221 |
| rs13161018     | FABP6   | 5 | 159591851 | 4 | 0.296674 |
| rs13161018     | FABP6   | 5 | 159591851 | 3 | 0.929015 |
| rs13161018     | FABP6   | 5 | 159591851 | 2 | 0.899769 |
| rs13161018     | FABP6   | 5 | 159591851 | 1 | 0.480231 |
| rs9216         | C1QTNF2 | 5 | 159708625 | 1 | 0.288282 |
| rs6892951      | ATP10B  | 5 | 159922761 | 2 | 4.715007 |
| rs6892951      | ATP10B  | 5 | 159922761 | 6 | 0.009507 |
| rs6892951      | ATP10B  | 5 | 159922761 | 5 | 7.002282 |
| rs6892951      | ATP10B  | 5 | 159922761 | 4 | 5.447832 |
| rs6892951      | ATP10B  | 5 | 159922761 | 8 | 3.221508 |
| rs6892951      | ATP10B  | 5 | 159922761 | 1 | 1.046532 |
| rs6894908      | ATP10B  | 5 | 160048357 | 4 | 0.205298 |
| rs6894908      | ATP10B  | 5 | 160048357 | 3 | 0.511389 |
| rs6894908      | ATP10B  | 5 | 160048357 | 7 | 1.146914 |
| rs13188991     | GABRA6  | 5 | 161045582 | 1 | 1.622876 |
| rs211037       | GABRG2  | 5 | 161460858 | 5 | 0.841127 |
| rs211037       | GABRG2  | 5 | 161460858 | 4 | 0.415754 |
| rs299284       | HMMR    | 5 | 162829228 | 3 | 0.082634 |
| rs17061795     | MAT2B   | 5 | 162873577 | 3 | 0.086135 |
| rs17070023     | ODZ2    | 5 | 167607050 | 7 | 0.458959 |
| rs17070023     | ODZ2    | 5 | 167607050 | 2 | 4.964389 |
| rs17632540     | ODZ2    | 5 | 167621874 | 5 | 0.037862 |
| rs17632540     | ODZ2    | 5 | 167621874 | 1 | 0.890331 |
| rs17632540     | ODZ2    | 5 | 167621874 | 2 | 2.84558  |
| rs17551608     | WWC1    | 5 | 167768117 | 1 | 2.955529 |
| SNP5-167813610 | WWC1    | 5 | 167813610 | 3 | 0.043138 |
| SNP5-167813610 | WWC1    | 5 | 167813610 | 8 | 6.154069 |
| SNP5-167813610 | WWC1    | 5 | 167813610 | 1 | 3.374201 |
| SNP5-167813610 | WWC1    | 5 | 167813610 | 4 | 5.670965 |
| rs292486       | SLIT3   | 5 | 168031041 | 3 | 0.817882 |
| rs292486       | SLIT3   | 5 | 168031041 | 4 | 0.211551 |
| rs35305517     | SLIT3   | 5 | 168045505 | 6 | 5.657354 |
| rs3797715      | SLIT3   | 5 | 168166052 | 1 | 5.002887 |
| rs4867964      | SLIT3   | 5 | 168177025 | 3 | 0.693379 |

|            |          |   |           |   |          |
|------------|----------|---|-----------|---|----------|
| rs4867964  | SLIT3    | 5 | 168177025 | 6 | 1.31798  |
| rs17558310 | CCDC99   | 5 | 168943373 | 5 | 0.59385  |
| rs17558310 | CCDC99   | 5 | 168943373 | 2 | 4.962607 |
| rs3797713  | CCDC99   | 5 | 168961059 | 4 | 5.976123 |
| rs3797713  | CCDC99   | 5 | 168961059 | 3 | 0.256807 |
| rs3797713  | CCDC99   | 5 | 168961059 | 6 | 5.393253 |
| rs2306559  | DOCK2    | 5 | 169062000 | 1 | 0.456746 |
| rs13155521 | DOCK2    | 5 | 169107062 | 2 | 3.215881 |
| rs2287727  | DOCK2    | 5 | 169368291 | 5 | 0.967954 |
| rs2287727  | DOCK2    | 5 | 169368291 | 3 | 0.907104 |
| rs2287727  | DOCK2    | 5 | 169368291 | 1 | 4.869434 |
| rs9791113  | DOCK2    | 5 | 169387519 | 4 | 0.87739  |
| rs1045168  | DOCK2    | 5 | 169437321 | 4 | 0.328304 |
| rs1045168  | DOCK2    | 5 | 169437321 | 6 | 0.73448  |
| rs1045176  | DOCK2    | 5 | 169442598 | 4 | 1.90814  |
| rs1045176  | DOCK2    | 5 | 169442598 | 2 | 3.928506 |
| rs1045176  | DOCK2    | 5 | 169442598 | 7 | 1.208717 |
| rs9307     | DOCK2    | 5 | 169442601 | 2 | 3.457377 |
| rs9307     | DOCK2    | 5 | 169442601 | 7 | 0.993708 |
| rs9307     | DOCK2    | 5 | 169442601 | 4 | 0.501783 |
| rs9307     | DOCK2    | 5 | 169442601 | 5 | 0.089073 |
| rs1045192  | DOCK2    | 5 | 169442768 | 4 | 0.005822 |
| rs1045192  | DOCK2    | 5 | 169442768 | 7 | 1.482005 |
| rs6873124  | FOXI1    | 5 | 169468312 | 2 | 0.741948 |
| rs6873124  | FOXI1    | 5 | 169468312 | 4 | 4.450982 |
| rs6873124  | FOXI1    | 5 | 169468312 | 7 | 0.349491 |
| rs10039796 | LCP2     | 5 | 169607743 | 3 | 0.322324 |
| rs10039796 | LCP2     | 5 | 169607743 | 7 | 1.60079  |
| rs10039796 | LCP2     | 5 | 169607743 | 1 | 0.346019 |
| rs10039796 | LCP2     | 5 | 169607743 | 5 | 1.117741 |
| rs315717   | LCP2     | 5 | 169617741 | 2 | 3.096692 |
| rs314156   | KCNMB1   | 5 | 169737989 | 8 | 0.29434  |
| rs314156   | KCNMB1   | 5 | 169737989 | 6 | 1.612372 |
| rs2656841  | KCNMB1   | 5 | 169738207 | 1 | 0.280141 |
| rs2656841  | KCNMB1   | 5 | 169738207 | 2 | 2.39515  |
| rs11739136 | KCNMB1   | 5 | 169743374 | 4 | 1.795592 |
| rs11739136 | KCNMB1   | 5 | 169743374 | 5 | 2.924434 |
| rs17563665 | KCNMB1   | 5 | 169748849 | 1 | 2.187215 |
| rs1055381  | KCNIP1   | 5 | 170095949 | 3 | 1.274703 |
| rs1055381  | KCNIP1   | 5 | 170095949 | 5 | 2.669615 |
| rs7725726  | GABRP    | 5 | 170148248 | 2 | 2.550255 |
| rs2914331  | RANBP17  | 5 | 170658852 | 2 | 5.778014 |
| rs2914331  | RANBP17  | 5 | 170658852 | 7 | 0.364054 |
| rs2914331  | RANBP17  | 5 | 170658852 | 1 | 0.0933   |
| rs2914331  | RANBP17  | 5 | 170658852 | 3 | 0.636578 |
| rs4868141  | STK10    | 5 | 171456041 | 5 | 5.434467 |
| rs10050631 | SH3PXD2B | 5 | 171696779 | 5 | 1.05384  |

|                |           |   |           |   |          |
|----------------|-----------|---|-----------|---|----------|
| rs10050631     | SH3PXD2B  | 5 | 171696779 | 2 | 5.590333 |
| rs10050631     | SH3PXD2B  | 5 | 171696779 | 7 | 0.688532 |
| rs17714774     | LOC401218 | 5 | 172122233 | 4 | 3.715303 |
| rs17075508     | SNORA74B  | 5 | 172380368 | 6 | 0.690874 |
| rs17075508     | SNORA74B  | 5 | 172380368 | 4 | 6.783325 |
| rs1965668      | LOC391850 | 5 | 172586007 | 6 | 2.292818 |
| rs1965668      | LOC391850 | 5 | 172586007 | 7 | 3.358421 |
| rs1965668      | LOC391850 | 5 | 172586007 | 3 | 2.761003 |
| rs703752       | NKX2-5    | 5 | 172592117 | 8 | 1.300791 |
| rs703752       | NKX2-5    | 5 | 172592117 | 4 | 0.73212  |
| rs703752       | NKX2-5    | 5 | 172592117 | 3 | 0.229763 |
| rs703752       | NKX2-5    | 5 | 172592117 | 2 | 1.447767 |
| rs703752       | NKX2-5    | 5 | 172592117 | 1 | 2.025343 |
| rs703752       | NKX2-5    | 5 | 172592117 | 5 | 1.134315 |
| rs2277923      | NKX2-5    | 5 | 172594630 | 1 | 1.066867 |
| rs1564823      | CPEB4     | 5 | 173315800 | 1 | 5.099043 |
| rs4457100      | HMP19     | 5 | 173467483 | 4 | 0.996425 |
| rs4457100      | HMP19     | 5 | 173467483 | 2 | 0.527802 |
| rs14459        | MSX2      | 5 | 174090317 | 3 | 0.280931 |
| rs156373       | SFXN1     | 5 | 174887467 | 3 | 0.383231 |
| rs156373       | SFXN1     | 5 | 174887467 | 7 | 1.308793 |
| rs10516139     | UBXD8     | 5 | 175868923 | 4 | 1.233327 |
| rs17078320     | PCLKC     | 5 | 175930852 | 1 | 0.950093 |
| rs2358747      | PCLKC     | 5 | 175938083 | 1 | 0.723293 |
| rs4868660      | PCLKC     | 5 | 175944495 | 1 | 0.562636 |
| rs4868660      | PCLKC     | 5 | 175944495 | 7 | 0.57557  |
| rs2291442      | PCLKC     | 5 | 175950061 | 3 | 0.88353  |
| rs2291442      | PCLKC     | 5 | 175950061 | 7 | 0.243918 |
| rs3736432      | UNC5A     | 5 | 176240110 | 1 | 6.432775 |
| rs3736432      | UNC5A     | 5 | 176240110 | 4 | 0.326517 |
| rs3736432      | UNC5A     | 5 | 176240110 | 3 | 2.766787 |
| rs2278492      | HK3       | 5 | 176247065 | 1 | 0.744566 |
| rs3733876      | UIMC1     | 5 | 176315601 | 1 | 3.894199 |
| rs1966265      | FGFR4     | 5 | 176449237 | 7 | 0.394601 |
| rs376618       | FGFR4     | 5 | 176450403 | 5 | 1.034928 |
| rs376618       | FGFR4     | 5 | 176450403 | 3 | 1.515191 |
| rs9489         | FGFR4     | 5 | 176457635 | 1 | 4.887013 |
| rs1363405      | NSD1      | 5 | 176569488 | 3 | 0.972965 |
| rs1363405      | NSD1      | 5 | 176569488 | 2 | 4.785522 |
| rs1363405      | NSD1      | 5 | 176569488 | 6 | 0.264333 |
| rs3733875      | NSD1      | 5 | 176569846 | 2 | 5.071806 |
| SNP5-176571112 | NSD1      | 5 | 176571112 | 3 | 0.0801   |
| SNP5-176653757 | NSD1      | 5 | 176653757 | 8 | 0.227251 |
| SNP5-176653757 | NSD1      | 5 | 176653757 | 3 | 0.098113 |
| rs11740250     | NSD1      | 5 | 176653878 | 1 | 4.97353  |
| rs11740250     | NSD1      | 5 | 176653878 | 3 | 0.068112 |
| rs11740250     | NSD1      | 5 | 176653878 | 8 | 6.581292 |

|            |           |   |           |   |          |
|------------|-----------|---|-----------|---|----------|
| rs9313754  | RAB24     | 5 | 176663284 | 5 | 0.215526 |
| rs9313754  | RAB24     | 5 | 176663284 | 7 | 4.409489 |
| rs9313754  | RAB24     | 5 | 176663284 | 3 | 0.131822 |
| rs28670911 | PRELID1   | 5 | 176665722 | 2 | 6.433679 |
| rs17876047 | F12       | 5 | 176764195 | 6 | 0.965948 |
| rs1801020  | F12       | 5 | 176769138 | 2 | 3.949561 |
| rs335435   | GRK6      | 5 | 176800549 | 6 | 4.631641 |
| GA004936   | PDLIM7    | 5 | 176850503 | 1 | 4.312278 |
| rs6634     | TMED9     | 5 | 176955704 | 7 | 2.877343 |
| rs6634     | TMED9     | 5 | 176955704 | 8 | 0.398545 |
| rs6634     | TMED9     | 5 | 176955704 | 2 | 2.873656 |
| rs6634     | TMED9     | 5 | 176955704 | 3 | 0.415029 |
| rs6886539  | LOC202181 | 5 | 176991736 | 5 | 1.089321 |
| rs6886539  | LOC202181 | 5 | 176991736 | 7 | 0.989854 |
| rs6886539  | LOC202181 | 5 | 176991736 | 8 | 0.007113 |
| rs2913858  | AGXT2L2   | 5 | 177592384 | 3 | 0.011871 |
| rs13741    | COL23A1   | 5 | 177597606 | 6 | 3.582482 |
| rs1544925  | COL23A1   | 5 | 177598092 | 7 | 0.452578 |
| rs890802   | COL23A1   | 5 | 177615983 | 3 | 0.74734  |
| rs890802   | COL23A1   | 5 | 177615983 | 7 | 0.292376 |
| rs2004503  | LOC643618 | 5 | 178269728 | 3 | 0.800322 |
| rs2004503  | LOC643618 | 5 | 178269728 | 1 | 0.995283 |
| rs732531   | LOC643618 | 5 | 178269821 | 6 | 3.100894 |
| rs732531   | LOC643618 | 5 | 178269821 | 5 | 3.360452 |
| rs732531   | LOC643618 | 5 | 178269821 | 1 | 4.420399 |
| rs732531   | LOC643618 | 5 | 178269821 | 8 | 7.163312 |
| rs732531   | LOC643618 | 5 | 178269821 | 2 | 0.167177 |
| rs732531   | LOC643618 | 5 | 178269821 | 7 | 4.536249 |
| rs7724141  | ZFP2      | 5 | 178272661 | 5 | 5.190791 |
| rs7724141  | ZFP2      | 5 | 178272661 | 4 | 0.693387 |
| rs12187167 | ZFP2      | 5 | 178292428 | 1 | 6.011194 |
| rs12187167 | ZFP2      | 5 | 178292428 | 4 | 0.848736 |
| rs12187167 | ZFP2      | 5 | 178292428 | 5 | 0.537923 |
| rs12186577 | ZFP2      | 5 | 178292595 | 4 | 0.281879 |
| rs12186577 | ZFP2      | 5 | 178292595 | 5 | 0.323839 |
| rs12186577 | ZFP2      | 5 | 178292595 | 1 | 3.72952  |
| rs12186584 | ZFP2      | 5 | 178292662 | 5 | 1.505817 |
| rs12186584 | ZFP2      | 5 | 178292662 | 1 | 5.567727 |
| rs12186584 | ZFP2      | 5 | 178292662 | 4 | 0.695944 |
| rs6867221  | ZNF454    | 5 | 178324466 | 7 | 0.510466 |
| rs6867221  | ZNF454    | 5 | 178324466 | 3 | 0.476747 |
| rs12719860 | ZNF454    | 5 | 178324508 | 3 | 0.789347 |
| rs12719860 | ZNF454    | 5 | 178324508 | 7 | 0.326035 |
| rs7725272  | GRM6      | 5 | 178338994 | 2 | 2.37795  |
| rs7725272  | GRM6      | 5 | 178338994 | 7 | 0.343698 |
| rs7725272  | GRM6      | 5 | 178338994 | 3 | 0.776161 |
| rs17078875 | GRM6      | 5 | 178342556 | 3 | 0.406007 |

|                |           |   |           |   |          |
|----------------|-----------|---|-----------|---|----------|
| rs11746675     | GRM6      | 5 | 178346553 | 5 | 0.211244 |
| rs2071246      | GRM6      | 5 | 178348894 | 1 | 1.61189  |
| rs1445846      | ZNF354C   | 5 | 178439675 | 3 | 0.384933 |
| rs1445846      | ZNF354C   | 5 | 178439675 | 8 | 4.496041 |
| rs1445846      | ZNF354C   | 5 | 178439675 | 4 | 3.730467 |
| rs1445846      | ZNF354C   | 5 | 178439675 | 2 | 5.768572 |
| rs1445844      | ZNF354C   | 5 | 178439876 | 4 | 0.449354 |
| rs1445844      | ZNF354C   | 5 | 178439876 | 3 | 0.516535 |
| rs1054480      | ADAMTS2   | 5 | 178473581 | 8 | 0.446896 |
| rs1054480      | ADAMTS2   | 5 | 178473581 | 1 | 2.374201 |
| rs2303644      | ADAMTS2   | 5 | 178487651 | 8 | 1.232667 |
| rs1972715      | ADAMTS2   | 5 | 178495573 | 8 | 1.603302 |
| rs398829       | ADAMTS2   | 5 | 178567278 | 7 | 0.194834 |
| rs4701135      | RUFY1     | 5 | 178953228 | 5 | 0.130083 |
| rs4701135      | RUFY1     | 5 | 178953228 | 2 | 1.001187 |
| rs4701135      | RUFY1     | 5 | 178953228 | 7 | 0.169118 |
| rs7700649      | LOC729595 | 5 | 179053869 | 8 | 0.829385 |
| rs7700649      | LOC729595 | 5 | 179053869 | 7 | 1.78402  |
| rs6895902      | MAML1     | 5 | 179134453 | 5 | 4.911647 |
| rs6895902      | MAML1     | 5 | 179134453 | 3 | 0.324789 |
| rs6895902      | MAML1     | 5 | 179134453 | 6 | 0.077264 |
| rs10060182     | LOC51149  | 5 | 179218358 | 8 | 0.130717 |
| rs10060182     | LOC51149  | 5 | 179218358 | 4 | 1.937824 |
| rs10060182     | LOC51149  | 5 | 179218358 | 7 | 0.263088 |
| SNP5-179235527 | TBC1D9B   | 5 | 179235527 | 8 | 6.342298 |
| SNP5-179235527 | TBC1D9B   | 5 | 179235527 | 6 | 0.009124 |
| rs2278662      | LOC729618 | 5 | 179460501 | 1 | 3.853142 |
| rs2278661      | RASGEF1C  | 5 | 179460673 | 1 | 2.082265 |
| rs2278661      | RASGEF1C  | 5 | 179460673 | 7 | 1.220221 |
| rs7725201      | RASGEF1C  | 5 | 179461730 | 1 | 3.575384 |
| rs7725201      | RASGEF1C  | 5 | 179461730 | 4 | 0.894711 |
| rs7725201      | RASGEF1C  | 5 | 179461730 | 8 | 4.223822 |
| rs11546322     | RASGEF1C  | 5 | 179496041 | 8 | 0.64463  |
| rs11546322     | RASGEF1C  | 5 | 179496041 | 3 | 0.045564 |
| rs11546322     | RASGEF1C  | 5 | 179496041 | 2 | 2.902571 |
| rs7725         | GFPT2     | 5 | 179660563 | 3 | 1.264361 |
| rs2303007      | GFPT2     | 5 | 179673433 | 3 | 0.397739 |
| rs2127379      | LOC643836 | 5 | 180220173 | 7 | 0.584227 |
| rs2127380      | LOC643836 | 5 | 180220238 | 3 | 0.529564 |
| rs2127380      | LOC643836 | 5 | 180220238 | 5 | 0.251476 |
| rs2127380      | LOC643836 | 5 | 180220238 | 6 | 5.378419 |
| rs2127380      | LOC643836 | 5 | 180220238 | 4 | 4.377182 |
| rs7703365      | BTNL8     | 5 | 180309624 | 5 | 0.986181 |
| rs7703365      | BTNL8     | 5 | 180309624 | 3 | 0.017834 |
| rs34645360     | BTNL3     | 5 | 180365650 | 1 | 0.268063 |
| rs34645360     | BTNL3     | 5 | 180365650 | 3 | 0.3952   |
| rs10434808     | BTNL9     | 5 | 180419691 | 5 | 0.039802 |

|            |              |   |           |   |          |
|------------|--------------|---|-----------|---|----------|
| rs10434808 | BTNL9        | 5 | 180419691 | 3 | 0.424946 |
| rs10434810 | BTNL9        | 5 | 180419750 | 3 | 0.547304 |
| rs2545098  | TRIM41       | 5 | 180583350 | 6 | 1.028445 |
| rs2545098  | TRIM41       | 5 | 180583350 | 1 | 1.23849  |
| rs2545098  | TRIM41       | 5 | 180583350 | 2 | 0.825733 |
| rs2545098  | TRIM41       | 5 | 180583350 | 5 | 0.439978 |
| rs6601178  | TRIM41       | 5 | 180583837 | 6 | 0.201703 |
| rs11242777 | NULL         | 6 | 243915    | 3 | 0.110283 |
| rs11242777 | NULL         | 6 | 243915    | 8 | 0.206134 |
| rs1050979  | IRF4         | 6 | 355417    | 1 | 1.185098 |
| rs1050979  | IRF4         | 6 | 355417    | 6 | 0.456137 |
| rs1050979  | IRF4         | 6 | 355417    | 7 | 0.34012  |
| rs1050979  | IRF4         | 6 | 355417    | 2 | 0.123056 |
| rs1877175  | IRF4         | 6 | 355493    | 1 | 1.47679  |
| rs1877176  | IRF4         | 6 | 355513    | 1 | 0.421811 |
| rs1877176  | IRF4         | 6 | 355513    | 2 | 1.185077 |
| rs1877176  | IRF4         | 6 | 355513    | 4 | 1.415287 |
| rs9392502  | IRF4         | 6 | 355608    | 4 | 0.322665 |
| rs9392502  | IRF4         | 6 | 355608    | 3 | 0.366232 |
| rs2316515  | IRF4         | 6 | 355848    | 1 | 0.128737 |
| rs2316515  | IRF4         | 6 | 355848    | 7 | 1.37566  |
| rs2316515  | IRF4         | 6 | 355848    | 2 | 0.767211 |
| rs2316515  | IRF4         | 6 | 355848    | 3 | 0.695861 |
| rs872071   | IRF4         | 6 | 356064    | 1 | 0.078454 |
| rs872071   | IRF4         | 6 | 356064    | 2 | 0.699892 |
| rs872071   | IRF4         | 6 | 356064    | 6 | 0.398373 |
| rs11242982 | LOC642335    | 6 | 482157    | 2 | 1.511404 |
| rs11242982 | LOC642335    | 6 | 482157    | 5 | 0.108764 |
| rs11242982 | LOC642335    | 6 | 482157    | 1 | 0.831224 |
| rs11242982 | LOC642335    | 6 | 482157    | 3 | 0.051452 |
| rs9328435  | LOC646773    | 6 | 766327    | 1 | 1.175892 |
| rs17816516 | NULL         | 6 | 1049875   | 2 | 0.788661 |
| rs17816516 | NULL         | 6 | 1049875   | 6 | 2.25611  |
| rs2293783  | FOXF2        | 6 | 1340042   | 3 | 0.593566 |
| rs7761242  | NULL         | 6 | 1459366   | 1 | 3.061317 |
| rs7761242  | NULL         | 6 | 1459366   | 8 | 0.041035 |
| rs1545849  | C6orf195     | 6 | 2567910   | 3 | 0.52357  |
| rs9501863  | C6orf195     | 6 | 2568422   | 6 | 0.397066 |
| rs9501863  | C6orf195     | 6 | 2568422   | 1 | 4.307909 |
| rs9501863  | C6orf195     | 6 | 2568422   | 7 | 0.324107 |
| rs6902511  | C6orf195     | 6 | 2568819   | 1 | 0.656122 |
| rs9503233  | C6orf195     | 6 | 2568929   | 1 | 2.348431 |
| rs9503233  | C6orf195     | 6 | 2568929   | 7 | 1.131521 |
| rs17135340 | C6orf195     | 6 | 2569052   | 3 | 0.14098  |
| rs17135340 | C6orf195     | 6 | 2569052   | 8 | 0.158909 |
| rs34857522 | RP11-145H9.1 | 6 | 2610937   | 3 | 0.667455 |
| rs34857522 | RP11-145H9.1 | 6 | 2610937   | 2 | 2.915474 |

|            |                |   |         |   |          |
|------------|----------------|---|---------|---|----------|
| rs34857522 | RP11-145H9.1   | 6 | 2610937 | 8 | 0.29338  |
| rs17135412 | RP11-145H9.1   | 6 | 2611427 | 3 | 1.398094 |
| rs12203065 | RP11-145H9.1   | 6 | 2611477 | 1 | 1.494008 |
| rs12203132 | RP11-145H9.1   | 6 | 2611548 | 1 | 2.237475 |
| rs12203132 | RP11-145H9.1   | 6 | 2611548 | 4 | 0.946438 |
| rs12203132 | RP11-145H9.1   | 6 | 2611548 | 8 | 0.691619 |
| rs9503245  | RP11-145H9.1   | 6 | 2611847 | 1 | 1.194858 |
| rs9503245  | RP11-145H9.1   | 6 | 2611847 | 4 | 0.750847 |
| rs733985   | RP11-145H9.1   | 6 | 2611931 | 5 | 1.29145  |
| rs733985   | RP11-145H9.1   | 6 | 2611931 | 3 | 0.950857 |
| rs733985   | RP11-145H9.1   | 6 | 2611931 | 1 | 0.770702 |
| rs6904200  | RP11-145H9.1   | 6 | 2612030 | 5 | 1.359179 |
| rs6904200  | RP11-145H9.1   | 6 | 2612030 | 4 | 0.580011 |
| rs6904200  | RP11-145H9.1   | 6 | 2612030 | 8 | 0.472134 |
| rs9501868  | RP11-145H9.1   | 6 | 2612348 | 8 | 2.946556 |
| rs9501868  | RP11-145H9.1   | 6 | 2612348 | 4 | 0.731335 |
| rs9501868  | RP11-145H9.1   | 6 | 2612348 | 1 | 2.915713 |
| rs9501869  | RP11-145H9.1   | 6 | 2612369 | 4 | 1.26523  |
| rs9501869  | RP11-145H9.1   | 6 | 2612369 | 1 | 3.621224 |
| rs9501872  | RP11-145H9.1   | 6 | 2612499 | 1 | 1.583613 |
| rs9501872  | RP11-145H9.1   | 6 | 2612499 | 8 | 0.440545 |
| rs9501872  | RP11-145H9.1   | 6 | 2612499 | 6 | 0.549554 |
| rs9501873  | RP11-145H9.1   | 6 | 2612688 | 1 | 2.370377 |
| rs9501873  | RP11-145H9.1   | 6 | 2612688 | 8 | 0.46034  |
| rs9501873  | RP11-145H9.1   | 6 | 2612688 | 6 | 1.148042 |
| rs12206682 | RP11-145H9.1   | 6 | 2613070 | 4 | 0.198865 |
| rs12206682 | RP11-145H9.1   | 6 | 2613070 | 6 | 0.206516 |
| rs12206682 | RP11-145H9.1   | 6 | 2613070 | 1 | 2.571712 |
| rs2296356  | RP11-145H9.1   | 6 | 2694380 | 3 | 0.127074 |
| rs192907   | SERPINB9       | 6 | 2832770 | 4 | 0.894528 |
| rs192907   | SERPINB9       | 6 | 2832770 | 2 | 3.252721 |
| rs1052886  | SERPINB9       | 6 | 2835189 | 6 | 0.341379 |
| rs1052886  | SERPINB9       | 6 | 2835189 | 4 | 0.434473 |
| rs1052886  | SERPINB9       | 6 | 2835189 | 8 | 2.209997 |
| rs318486   | SERPINB9       | 6 | 2835282 | 7 | 0.593114 |
| rs318486   | SERPINB9       | 6 | 2835282 | 4 | 0.551611 |
| rs2326106  | DKFZp686l15217 | 6 | 2934581 | 1 | 0.690566 |
| rs4149367  | NQO2           | 6 | 2960864 | 3 | 0.367162 |
| rs6955     | NQO2           | 6 | 2964926 | 2 | 6.035736 |
| rs6955     | NQO2           | 6 | 2964926 | 3 | 0.022835 |
| rs6955     | NQO2           | 6 | 2964926 | 1 | 0.347866 |
| rs2272990  | RIPK1          | 6 | 3022140 | 3 | 0.653712 |
| rs41300839 | TUBB2A         | 6 | 3100946 | 3 | 0.320807 |
| rs1127485  | C6orf85        | 6 | 3215005 | 7 | 6.012247 |
| rs3813485  | C6orf85        | 6 | 3215120 | 7 | 5.857213 |
| rs3211066  | C6orf85        | 6 | 3216787 | 7 | 5.740884 |
| rs9501975  | C6orf85        | 6 | 3217806 | 7 | 3.165792 |

|              |           |   |         |   |          |
|--------------|-----------|---|---------|---|----------|
| rs742541     | C6orf145  | 6 | 3668331 | 1 | 3.138644 |
| rs226959     | C6orf145  | 6 | 3672810 | 1 | 5.238558 |
| rs6597007    | FAM50B    | 6 | 3796192 | 4 | 5.835564 |
| rs3196512    | FAM50B    | 6 | 3796544 | 5 | 0.361177 |
| rs3196512    | FAM50B    | 6 | 3796544 | 4 | 0.795663 |
| rs3196512    | FAM50B    | 6 | 3796544 | 3 | 0.727153 |
| rs9503893    | PRPF4B    | 6 | 3976997 | 7 | 3.255358 |
| rs9503893    | PRPF4B    | 6 | 3976997 | 1 | 5.218751 |
| rs9503893    | PRPF4B    | 6 | 3976997 | 6 | 4.944998 |
| rs9503893    | PRPF4B    | 6 | 3976997 | 4 | 0.700556 |
| rs10485172   | C6orf146  | 6 | 4014132 | 4 | 0.557083 |
| rs595413     | C6orf146  | 6 | 4014165 | 6 | 1.234373 |
| rs595413     | C6orf146  | 6 | 4014165 | 4 | 1.154573 |
| rs639905     | C6orf146  | 6 | 4014684 | 4 | 1.805611 |
| rs11751668   | C6orf201  | 6 | 4070473 | 7 | 0.329074 |
| rs659305     | C6orf201  | 6 | 4070654 | 8 | 3.641359 |
| rs3177253    | PECI      | 6 | 4078854 | 7 | 0.038126 |
| rs9405753    | KU-MEL-3  | 6 | 4556828 | 1 | 3.151774 |
| rs9405753    | KU-MEL-3  | 6 | 4556828 | 6 | 3.147508 |
| rs9405753    | KU-MEL-3  | 6 | 4556828 | 3 | 2.537663 |
| rs3812178    | CDYL      | 6 | 4661036 | 7 | 0.760715 |
| rs1749144    | RPP40     | 6 | 4943962 | 3 | 0.367443 |
| rs393628     | LYRM4     | 6 | 5054118 | 5 | 0.655844 |
| rs393628     | LYRM4     | 6 | 5054118 | 1 | 4.852686 |
| rs1050783    | F13A1     | 6 | 6090691 | 1 | 5.504832 |
| rs5988       | F13A1     | 6 | 6097136 | 7 | 1.476471 |
| rs5988       | F13A1     | 6 | 6097136 | 1 | 3.604644 |
| rs5986       | F13A1     | 6 | 6119855 | 4 | 0.568607 |
| rs5982       | F13A1     | 6 | 6119865 | 2 | 4.623629 |
| rs5982       | F13A1     | 6 | 6119865 | 3 | 3.796714 |
| rs1334576    | RREB1     | 6 | 7156817 | 6 | 4.302727 |
| SNP6-7175679 | RREB1     | 6 | 7175679 | 5 | 0.155113 |
| SNP6-7175679 | RREB1     | 6 | 7175679 | 3 | 0.031688 |
| SNP6-7192343 | RREB1     | 6 | 7192343 | 3 | 0.92399  |
| SNP6-7192343 | RREB1     | 6 | 7192343 | 6 | 0.720703 |
| rs6597266    | RIOK1     | 6 | 7335076 | 8 | 0.892065 |
| rs6597266    | RIOK1     | 6 | 7335076 | 3 | 0.857062 |
| rs6597266    | RIOK1     | 6 | 7335076 | 6 | 6.192789 |
| rs6597266    | RIOK1     | 6 | 7335076 | 5 | 6.086851 |
| rs6597269    | LOC644051 | 6 | 7462238 | 4 | 4.571859 |
| rs6597269    | LOC644051 | 6 | 7462238 | 1 | 3.446314 |
| rs17604693   | DSP       | 6 | 7510726 | 1 | 4.971502 |
| rs2064217    | DSP       | 6 | 7522259 | 1 | 4.030289 |
| rs2744380    | DSP       | 6 | 7530966 | 8 | 0.148691 |
| rs2744380    | DSP       | 6 | 7530966 | 1 | 4.199717 |
| rs2744380    | DSP       | 6 | 7530966 | 4 | 0.925354 |
| rs2744380    | DSP       | 6 | 7530966 | 6 | 0.152727 |



|               |          |   |          |   |          |
|---------------|----------|---|----------|---|----------|
| rs3734586     | C6orf151 | 6 | 7546719  | 8 | 0.117028 |
| rs3734586     | C6orf151 | 6 | 7546719  | 1 | 5.763829 |
| rs2806218     | C6orf151 | 6 | 7555485  | 6 | 1.8351   |
| rs2806218     | C6orf151 | 6 | 7555485  | 2 | 3.067796 |
| rs2806218     | C6orf151 | 6 | 7555485  | 3 | 0.83934  |
| rs2806218     | C6orf151 | 6 | 7555485  | 5 | 2.355618 |
| rs17558       | BMP6     | 6 | 7807588  | 2 | 1.664917 |
| rs8643        | TXNDC5   | 6 | 7828072  | 3 | 0.56949  |
| rs8643        | TXNDC5   | 6 | 7828072  | 8 | 8.14322  |
| rs16870746    | GCM2     | 6 | 10990056 | 5 | 0.130176 |
| rs4713039     | SYCP2L   | 6 | 11014242 | 6 | 1.646959 |
| rs4713039     | SYCP2L   | 6 | 11014242 | 8 | 1.342435 |
| rs4713039     | SYCP2L   | 6 | 11014242 | 4 | 0.146874 |
| rs4713039     | SYCP2L   | 6 | 11014242 | 3 | 0.489383 |
| rs3798751     | SYCP2L   | 6 | 11050950 | 3 | 0.346185 |
| rs3798751     | SYCP2L   | 6 | 11050950 | 4 | 0.7926   |
| rs3734397     | ELOVL2   | 6 | 11090834 | 1 | 2.49807  |
| rs1099        | HERV-FRD | 6 | 11210857 | 8 | 1.184744 |
| rs1099        | HERV-FRD | 6 | 11210857 | 6 | 2.121943 |
| rs1099        | HERV-FRD | 6 | 11210857 | 5 | 0.447477 |
| rs13214666    | HERV-FRD | 6 | 11211523 | 5 | 0.736763 |
| rs13214666    | HERV-FRD | 6 | 11211523 | 3 | 0.7824   |
| rs13214666    | HERV-FRD | 6 | 11211523 | 7 | 0.560508 |
| rs1044411     | NEDD9    | 6 | 11291889 | 1 | 5.936482 |
| rs1044411     | NEDD9    | 6 | 11291889 | 8 | 0.198142 |
| rs1044411     | NEDD9    | 6 | 11291889 | 3 | 0.144686 |
| rs1044411     | NEDD9    | 6 | 11291889 | 6 | 5.212692 |
| rs1044411     | NEDD9    | 6 | 11291889 | 5 | 0.418778 |
| rs10601       | NEDD9    | 6 | 11293243 | 4 | 4.855898 |
| rs10601       | NEDD9    | 6 | 11293243 | 7 | 5.682811 |
| rs16871074    | NEDD9    | 6 | 11301846 | 1 | 5.806784 |
| rs16871074    | NEDD9    | 6 | 11301846 | 8 | 7.465707 |
| rs2034        | NEDD9    | 6 | 11308842 | 3 | 0.449051 |
| rs2034        | NEDD9    | 6 | 11308842 | 6 | 4.224262 |
| rs2034        | NEDD9    | 6 | 11308842 | 1 | 4.303713 |
| rs3798734     | NEDD9    | 6 | 11309143 | 6 | 3.17129  |
| rs3798734     | NEDD9    | 6 | 11309143 | 3 | 0.549435 |
| rs3798734     | NEDD9    | 6 | 11309143 | 1 | 5.048466 |
| SNP6-12232573 | HIVEP1   | 6 | 12232573 | 5 | 0.157656 |
| SNP6-12232573 | HIVEP1   | 6 | 12232573 | 7 | 4.659471 |
| SNP6-12232573 | HIVEP1   | 6 | 12232573 | 2 | 0.101609 |
| SNP6-12232573 | HIVEP1   | 6 | 12232573 | 1 | 0.185631 |
| SNP6-13720057 | SIRT5    | 6 | 13720057 | 5 | 7.825715 |
| rs280162      | RNF182   | 6 | 14086254 | 6 | 0.600615 |
| rs280162      | RNF182   | 6 | 14086254 | 5 | 0.905554 |
| rs280162      | RNF182   | 6 | 14086254 | 7 | 1.499007 |
| rs280162      | RNF182   | 6 | 14086254 | 1 | 0.315843 |

|            |           |   |          |   |          |
|------------|-----------|---|----------|---|----------|
| rs280163   | RNF182    | 6 | 14086597 | 6 | 0.316652 |
| rs280163   | RNF182    | 6 | 14086597 | 1 | 1.420698 |
| rs2147200  | RNF182    | 6 | 14086833 | 6 | 0.848444 |
| rs2147200  | RNF182    | 6 | 14086833 | 7 | 1.108769 |
| rs2147200  | RNF182    | 6 | 14086833 | 5 | 1.467576 |
| rs2147200  | RNF182    | 6 | 14086833 | 1 | 0.826073 |
| rs2147201  | RNF182    | 6 | 14087505 | 1 | 1.000019 |
| rs2147201  | RNF182    | 6 | 14087505 | 6 | 0.492249 |
| rs2235258  | JARID2    | 6 | 15621461 | 3 | 0.128791 |
| rs17470454 | DTNBP1    | 6 | 15631427 | 1 | 5.496998 |
| rs2294264  | LOC644906 | 6 | 16216410 | 4 | 0.736654 |
| rs2294264  | LOC644906 | 6 | 16216410 | 5 | 0.184364 |
| rs2294264  | LOC644906 | 6 | 16216410 | 3 | 0.55027  |
| rs2294264  | LOC644906 | 6 | 16216410 | 1 | 0.044709 |
| rs1042391  | GMPR      | 6 | 16398740 | 6 | 7.085412 |
| rs1042391  | GMPR      | 6 | 16398740 | 1 | 5.366185 |
| rs6723     | GMPR      | 6 | 16403568 | 1 | 5.630485 |
| rs6723     | GMPR      | 6 | 16403568 | 6 | 1.319053 |
| rs111168   | ATXN1     | 6 | 16414338 | 7 | 0.057957 |
| rs111168   | ATXN1     | 6 | 16414338 | 5 | 0.627167 |
| rs111168   | ATXN1     | 6 | 16414338 | 6 | 7.933522 |
| rs10807614 | CAP2      | 6 | 17651281 | 4 | 0.788141 |
| rs10807614 | CAP2      | 6 | 17651281 | 6 | 1.110714 |
| rs10807614 | CAP2      | 6 | 17651281 | 7 | 1.336741 |
| rs10807614 | CAP2      | 6 | 17651281 | 5 | 1.117032 |
| rs10807614 | CAP2      | 6 | 17651281 | 8 | 3.69502  |
| rs6919110  | FAM8A1    | 6 | 17708598 | 1 | 0.795645 |
| rs942376   | KIF13A    | 6 | 17889429 | 4 | 6.537    |
| rs3734234  | KIF13A    | 6 | 17902473 | 7 | 1.75716  |
| rs3734234  | KIF13A    | 6 | 17902473 | 4 | 1.834431 |
| rs3734234  | KIF13A    | 6 | 17902473 | 1 | 3.82467  |
| rs3734234  | KIF13A    | 6 | 17902473 | 3 | 1.015854 |
| rs2842934  | TPMT      | 6 | 18247193 | 7 | 0.726444 |
| rs1800460  | TPMT      | 6 | 18247207 | 1 | 5.66505  |
| rs1800460  | TPMT      | 6 | 18247207 | 5 | 4.779786 |
| rs4716224  | AOF1      | 6 | 18269542 | 2 | 3.58459  |
| rs4716224  | AOF1      | 6 | 18269542 | 3 | 0.549051 |
| rs6903583  | AOF1      | 6 | 18321967 | 1 | 1.226738 |
| rs6903583  | AOF1      | 6 | 18321967 | 2 | 0.058076 |
| rs6903583  | AOF1      | 6 | 18321967 | 3 | 1.014647 |
| rs6903583  | AOF1      | 6 | 18321967 | 5 | 0.768122 |
| rs2296198  | RNF144B   | 6 | 18507729 | 5 | 1.369747 |
| rs9396868  | RNF144B   | 6 | 18575501 | 2 | 3.74665  |
| rs9396868  | RNF144B   | 6 | 18575501 | 7 | 1.87911  |
| rs1936905  | KRT18P38  | 6 | 19721057 | 5 | 0.304953 |
| rs1936906  | KRT18P38  | 6 | 19721067 | 6 | 2.821835 |
| rs1936906  | KRT18P38  | 6 | 19721067 | 3 | 1.372342 |

|            |           |   |          |   |          |
|------------|-----------|---|----------|---|----------|
| rs6915322  | LOC729177 | 6 | 22244139 | 1 | 4.071888 |
| rs9466269  | LOC729177 | 6 | 22244388 | 1 | 3.869571 |
| rs9466269  | LOC729177 | 6 | 22244388 | 8 | 1.412541 |
| rs3734215  | HDGFL1    | 6 | 22679302 | 5 | 2.612597 |
| rs3734215  | HDGFL1    | 6 | 22679302 | 3 | 2.134014 |
| rs6937665  | DCDC2     | 6 | 24280905 | 7 | 0.770181 |
| rs6937665  | DCDC2     | 6 | 24280905 | 1 | 5.354454 |
| rs6456593  | DCDC2     | 6 | 24282308 | 7 | 0.464587 |
| rs6456594  | DCDC2     | 6 | 24282312 | 1 | 0.244925 |
| rs6456594  | DCDC2     | 6 | 24282312 | 2 | 2.450996 |
| rs6456594  | DCDC2     | 6 | 24282312 | 7 | 1.097199 |
| rs9358755  | DCDC2     | 6 | 24282934 | 6 | 0.124392 |
| rs2274305  | DCDC2     | 6 | 24399182 | 1 | 3.241924 |
| rs2274305  | DCDC2     | 6 | 24399182 | 7 | 0.433509 |
| rs3761788  | MRS2L     | 6 | 24523359 | 5 | 0.565056 |
| rs1042303  | GPLD1     | 6 | 24545437 | 5 | 0.528168 |
| rs1042303  | GPLD1     | 6 | 24545437 | 4 | 0.269947 |
| rs1042303  | GPLD1     | 6 | 24545437 | 8 | 0.774012 |
| rs1042303  | GPLD1     | 6 | 24545437 | 2 | 1.724869 |
| rs9358767  | GPLD1     | 6 | 24553808 | 4 | 1.674556 |
| rs6924628  | GPLD1     | 6 | 24562371 | 7 | 0.633387 |
| rs9461026  | GPLD1     | 6 | 24581763 | 7 | 0.393628 |
| rs1126617  | GPLD1     | 6 | 24597631 | 7 | 3.855182 |
| rs1126617  | GPLD1     | 6 | 24597631 | 5 | 0.455865 |
| rs1126617  | GPLD1     | 6 | 24597631 | 8 | 2.128569 |
| rs2760183  | KIAA0319  | 6 | 24652880 | 7 | 0.881289 |
| rs699463   | KIAA0319  | 6 | 24652882 | 2 | 4.849787 |
| rs699463   | KIAA0319  | 6 | 24652882 | 8 | 1.43138  |
| rs699463   | KIAA0319  | 6 | 24652882 | 5 | 1.318388 |
| rs699463   | KIAA0319  | 6 | 24652882 | 4 | 0.882163 |
| rs12196913 | KIAA0319  | 6 | 24653286 | 1 | 0.357951 |
| rs12196913 | KIAA0319  | 6 | 24653286 | 2 | 2.161783 |
| rs12196913 | KIAA0319  | 6 | 24653286 | 4 | 0.466812 |
| rs4504469  | KIAA0319  | 6 | 24696863 | 5 | 1.176635 |
| rs4504469  | KIAA0319  | 6 | 24696863 | 1 | 1.374676 |
| rs2038135  | KIAA0319  | 6 | 24753946 | 1 | 1.853813 |
| rs2294689  | TTRAP     | 6 | 24761252 | 7 | 6.375756 |
| rs1129644  | TTRAP     | 6 | 24761355 | 5 | 1.159175 |
| rs1129644  | TTRAP     | 6 | 24761355 | 1 | 4.308723 |
| rs17243157 | THEM2     | 6 | 24775302 | 3 | 1.373869 |
| rs17243157 | THEM2     | 6 | 24775302 | 4 | 3.822059 |
| rs2754775  | GMNN      | 6 | 24883160 | 4 | 0.315447 |
| rs2754775  | GMNN      | 6 | 24883160 | 3 | 0.928493 |
| rs2754775  | GMNN      | 6 | 24883160 | 5 | 1.352323 |
| rs303006   | CMAH      | 6 | 25192697 | 3 | 0.302728 |
| rs303006   | CMAH      | 6 | 25192697 | 5 | 0.673027 |
| rs11794    | SCGN      | 6 | 25809697 | 4 | 1.32689  |

|               |           |   |          |   |          |
|---------------|-----------|---|----------|---|----------|
| rs11794       | SCGN      | 6 | 25809697 | 1 | 3.04459  |
| rs11794       | SCGN      | 6 | 25809697 | 8 | 0.733488 |
| rs10105       | SCGN      | 6 | 25809882 | 8 | 0.803075 |
| rs17320558    | HIST1H2BA | 6 | 25835506 | 1 | 0.42184  |
| rs1141034     | SLC17A4   | 6 | 25888311 | 1 | 2.551887 |
| rs1141034     | SLC17A4   | 6 | 25888311 | 8 | 1.956486 |
| SNP6-25958824 | SLC17A3   | 6 | 25958824 | 4 | 4.281909 |
| SNP6-25958824 | SLC17A3   | 6 | 25958824 | 1 | 5.036927 |
| SNP6-26022832 | SLC17A2   | 6 | 26022832 | 7 | 2.128048 |
| rs3734528     | HIST1H4A  | 6 | 26130223 | 2 | 3.130109 |
| rs3734528     | HIST1H4A  | 6 | 26130223 | 7 | 0.10267  |
| rs3734528     | HIST1H4A  | 6 | 26130223 | 8 | 0.129894 |
| rs3752419     | HIST1H4B  | 6 | 26135412 | 8 | 0.836119 |
| rs3752419     | HIST1H4B  | 6 | 26135412 | 4 | 1.044483 |
| rs2213284     | HIST1H3B  | 6 | 26139847 | 5 | 0.62034  |
| rs2213284     | HIST1H3B  | 6 | 26139847 | 4 | 1.888013 |
| rs198845      | HIST1H1T  | 6 | 26215769 | 5 | 0.160378 |
| rs198845      | HIST1H1T  | 6 | 26215769 | 6 | 3.571773 |
| rs198845      | HIST1H1T  | 6 | 26215769 | 4 | 0.235726 |
| rs198844      | HIST1H1T  | 6 | 26216261 | 4 | 0.072123 |
| rs198844      | HIST1H1T  | 6 | 26216261 | 1 | 2.907547 |
| rs198844      | HIST1H1T  | 6 | 26216261 | 6 | 0.200848 |
| rs198844      | HIST1H1T  | 6 | 26216261 | 5 | 0.546164 |
| rs34550794    | HIST1H2AD | 6 | 26306993 | 6 | 1.321569 |
| rs41266803    | HIST1H3D  | 6 | 26307433 | 6 | 6.762127 |
| rs41266803    | HIST1H3D  | 6 | 26307433 | 7 | 4.521378 |
| rs16891458    | HIST1H1D  | 6 | 26342455 | 6 | 0.598525 |
| rs16891458    | HIST1H1D  | 6 | 26342455 | 7 | 0.195812 |
| rs2223591     | HIST1H3G  | 6 | 26379220 | 3 | 1.222746 |
| rs2393593     | HIST1H4H  | 6 | 26393662 | 2 | 2.873013 |
| rs2393593     | HIST1H4H  | 6 | 26393662 | 4 | 3.440793 |
| SNP6-26478727 | BTN3A2    | 6 | 26478727 | 2 | 8.146895 |
| SNP6-26478727 | BTN3A2    | 6 | 26478727 | 4 | 0.499811 |
| rs1979        | BTN3A2    | 6 | 26485570 | 7 | 1.734495 |
| SNP6-26496384 | BTN2A2    | 6 | 26496384 | 7 | 0.682002 |
| SNP6-26496384 | BTN2A2    | 6 | 26496384 | 1 | 2.957774 |
| rs3927423     | BTN2A2    | 6 | 26501466 | 8 | 0.125007 |
| rs4712990     | BTN3A1    | 6 | 26521723 | 4 | 0.551347 |
| rs4712990     | BTN3A1    | 6 | 26521723 | 2 | 3.49365  |
| rs3198487     | BTN3A1    | 6 | 26522352 | 2 | 5.093658 |
| rs3198487     | BTN3A1    | 6 | 26522352 | 4 | 0.384677 |
| rs10946829    | BTN2A3    | 6 | 26534466 | 4 | 0.242162 |
| rs10946829    | BTN2A3    | 6 | 26534466 | 2 | 2.029999 |
| SNP6-26534499 | BTN2A3    | 6 | 26534499 | 2 | 2.130396 |
| rs2893848     | BTN2A3    | 6 | 26538960 | 4 | 3.7646   |
| rs12207181    | BTN2A3    | 6 | 26539264 | 8 | 1.00388  |
| SNP6-26539319 | BTN2A3    | 6 | 26539319 | 4 | 1.313714 |

|               |           |   |          |   |          |
|---------------|-----------|---|----------|---|----------|
| SNP6-26539319 | BTN2A3    | 6 | 26539319 | 2 | 4.487271 |
| rs17611438    | BTN3A3    | 6 | 26551832 | 4 | 2.335589 |
| rs3846848     | BTN3A3    | 6 | 26554188 | 4 | 0.305975 |
| rs3846848     | BTN3A3    | 6 | 26554188 | 2 | 3.887625 |
| rs6907302     | BTN2A1    | 6 | 26566205 | 4 | 0.441687 |
| rs6907302     | BTN2A1    | 6 | 26566205 | 2 | 3.522241 |
| rs3736782     | BTN1A1    | 6 | 26613382 | 1 | 2.181877 |
| rs9393728     | BTN1A1    | 6 | 26617309 | 1 | 0.89499  |
| rs1056668     | BTN1A1    | 6 | 26618584 | 1 | 0.98728  |
| rs12204145    | ABT1      | 6 | 26708135 | 8 | 6.081125 |
| rs3800314     | LOC442172 | 6 | 27344027 | 1 | 1.123277 |
| rs2235233     | POM121L2  | 6 | 27387831 | 5 | 1.379432 |
| rs2235233     | POM121L2  | 6 | 27387831 | 3 | 0.911248 |
| rs2235233     | POM121L2  | 6 | 27387831 | 1 | 1.062151 |
| rs17739298    | FKSG83    | 6 | 27401028 | 6 | 0.842324 |
| rs17739298    | FKSG83    | 6 | 27401028 | 2 | 1.174442 |
| rs9468076     | ZNF204    | 6 | 27446869 | 8 | 2.139641 |
| rs9468076     | ZNF204    | 6 | 27446869 | 4 | 0.12     |
| rs10807020    | NULL      | 6 | 27464881 | 7 | 0.715764 |
| rs10807020    | NULL      | 6 | 27464881 | 4 | 1.421901 |
| rs10807020    | NULL      | 6 | 27464881 | 5 | 1.101203 |
| rs10807020    | NULL      | 6 | 27464881 | 1 | 3.900223 |
| rs10807021    | NULL      | 6 | 27464904 | 4 | 2.31254  |
| rs10807021    | NULL      | 6 | 27464904 | 1 | 4.859815 |
| rs10807021    | NULL      | 6 | 27464904 | 5 | 0.95233  |
| rs6904883     | NULL      | 6 | 27465287 | 1 | 3.288916 |
| rs6904883     | NULL      | 6 | 27465287 | 7 | 0.215652 |
| rs6904883     | NULL      | 6 | 27465287 | 5 | 0.00079  |
| rs6904883     | NULL      | 6 | 27465287 | 4 | 0.222301 |
| rs2206251     | NULL      | 6 | 27466371 | 5 | 0.25854  |
| rs2206251     | NULL      | 6 | 27466371 | 1 | 5.620316 |
| rs2206251     | NULL      | 6 | 27466371 | 7 | 0.201654 |
| rs2206251     | NULL      | 6 | 27466371 | 4 | 0.460694 |
| rs2206252     | NULL      | 6 | 27466441 | 1 | 2.384357 |
| rs2206252     | NULL      | 6 | 27466441 | 4 | 0.695384 |
| rs2206252     | NULL      | 6 | 27466441 | 5 | 0.642753 |
| rs2206252     | NULL      | 6 | 27466441 | 7 | 0.415614 |
| rs766093      | ZNF391    | 6 | 27476102 | 2 | 1.905509 |
| rs2076305     | MCFD2L    | 6 | 27483590 | 5 | 5.042421 |
| rs2076305     | MCFD2L    | 6 | 27483590 | 1 | 5.846086 |
| rs2076305     | MCFD2L    | 6 | 27483590 | 4 | 4.887085 |
| rs1883216     | ZNF184    | 6 | 27533164 | 7 | 0.693051 |
| rs1883216     | ZNF184    | 6 | 27533164 | 1 | 3.706009 |
| rs1883216     | ZNF184    | 6 | 27533164 | 5 | 0.794244 |
| rs7767176     | OR2B6     | 6 | 28033346 | 7 | 0.378402 |
| rs904142      | OR2B6     | 6 | 28033435 | 1 | 3.19438  |
| rs9380030     | OR2B6     | 6 | 28033806 | 1 | 3.501381 |

|               |           |   |          |   |          |
|---------------|-----------|---|----------|---|----------|
| rs203878      | ZNF165    | 6 | 28156975 | 6 | 0.138798 |
| rs203878      | ZNF165    | 6 | 28156975 | 2 | 3.115583 |
| rs203878      | ZNF165    | 6 | 28156975 | 7 | 0.8284   |
| rs9380068     | LOC222699 | 6 | 28291221 | 1 | 5.163551 |
| rs1150702     | LOC222699 | 6 | 28292076 | 2 | 6.444673 |
| rs1150703     | LOC222699 | 6 | 28292239 | 2 | 1.996308 |
| rs1736894     | LOC222699 | 6 | 28294533 | 2 | 1.484142 |
| rs1736894     | LOC222699 | 6 | 28294533 | 7 | 0.399854 |
| rs1736894     | LOC222699 | 6 | 28294533 | 8 | 3.694741 |
| rs1736894     | LOC222699 | 6 | 28294533 | 6 | 0.790705 |
| rs1233712     | ZNF193    | 6 | 28301110 | 2 | 2.69376  |
| rs1736895     | ZKSCAN4   | 6 | 28327805 | 6 | 0.152083 |
| rs1736895     | ZKSCAN4   | 6 | 28327805 | 8 | 2.78986  |
| rs1736895     | ZKSCAN4   | 6 | 28327805 | 2 | 2.511155 |
| rs1635        | NKAPL     | 6 | 28335583 | 1 | 5.184335 |
| rs9461446     | NKAPL     | 6 | 28335612 | 1 | 5.636735 |
| rs1679709     | NKAPL     | 6 | 28336321 | 1 | 0.890759 |
| rs1679709     | NKAPL     | 6 | 28336321 | 2 | 1.273659 |
| rs11965538    | ZNF187    | 6 | 28347894 | 1 | 0.514961 |
| rs11965538    | ZNF187    | 6 | 28347894 | 2 | 6.172465 |
| rs3800324     | PGBD1     | 6 | 28372660 | 1 | 1.267028 |
| rs3800325     | PGBD1     | 6 | 28372671 | 6 | 2.974803 |
| rs6456811     | PGBD1     | 6 | 28378026 | 6 | 1.972417 |
| rs9461449     | PGBD1     | 6 | 28378043 | 7 | 1.404525 |
| rs9461449     | PGBD1     | 6 | 28378043 | 8 | 6.896793 |
| rs9461449     | PGBD1     | 6 | 28378043 | 1 | 5.458472 |
| rs1062169     | PGBD1     | 6 | 28378230 | 6 | 0.143173 |
| SNP6-28439073 | ZKSCAN3   | 6 | 28439073 | 1 | 1.927357 |
| SNP6-28439106 | ZKSCAN3   | 6 | 28439106 | 8 | 7.980515 |
| SNP6-28439106 | ZKSCAN3   | 6 | 28439106 | 6 | 0.188363 |
| SNP6-28439106 | ZKSCAN3   | 6 | 28439106 | 1 | 1.08049  |
| SNP6-28439106 | ZKSCAN3   | 6 | 28439106 | 7 | 0.478885 |
| rs7775132     | ZSCAN12   | 6 | 28454992 | 8 | 0.539693 |
| rs7775132     | ZSCAN12   | 6 | 28454992 | 6 | 0.474157 |
| rs1052215     | ZSCAN12   | 6 | 28456137 | 7 | 2.349249 |
| rs1052215     | ZSCAN12   | 6 | 28456137 | 1 | 0.59856  |
| rs1052215     | ZSCAN12   | 6 | 28456137 | 6 | 0.249595 |
| rs1052215     | ZSCAN12   | 6 | 28456137 | 2 | 1.230607 |
| rs450630      | ZNF452    | 6 | 28650403 | 8 | 0.007644 |
| rs450630      | ZNF452    | 6 | 28650403 | 6 | 4.25852  |
| rs370520      | ZNF452    | 6 | 28650499 | 2 | 1.652121 |
| rs370520      | ZNF452    | 6 | 28650499 | 6 | 4.88741  |
| rs370520      | ZNF452    | 6 | 28650499 | 7 | 2.493441 |
| rs370520      | ZNF452    | 6 | 28650499 | 8 | 5.246134 |
| rs17336532    | ZNF452    | 6 | 28651243 | 1 | 5.037713 |
| rs17336532    | ZNF452    | 6 | 28651243 | 6 | 4.268799 |
| rs9368568     | LOC646160 | 6 | 28709280 | 7 | 1.06803  |

|            |              |   |          |   |          |
|------------|--------------|---|----------|---|----------|
| rs1233627  | NOL5BP       | 6 | 28859706 | 2 | 2.464577 |
| rs1233627  | NOL5BP       | 6 | 28859706 | 1 | 3.057874 |
| rs2071790  | C6orf100     | 6 | 29019781 | 1 | 0.504997 |
| rs3749977  | OR2J3        | 6 | 29188323 | 1 | 1.365969 |
| rs6930033  | OR5V1        | 6 | 29431884 | 2 | 2.419909 |
| rs2074470  | OR11A1       | 6 | 29502406 | 1 | 2.142663 |
| rs2074470  | OR11A1       | 6 | 29502406 | 2 | 1.963177 |
| rs9257857  | OR11A1       | 6 | 29502905 | 6 | 1.390683 |
| rs2074465  | OR10C1       | 6 | 29516455 | 2 | 0.969423 |
| rs3128854  | OR2H1        | 6 | 29539677 | 1 | 0.609143 |
| rs2076486  | UBD          | 6 | 29631851 | 3 | 1.168044 |
| rs2076485  | UBD          | 6 | 29631931 | 3 | 0.385792 |
| rs2076485  | UBD          | 6 | 29631931 | 1 | 3.2888   |
| rs2076485  | UBD          | 6 | 29631931 | 7 | 2.560736 |
| rs2076484  | UBD          | 6 | 29631982 | 3 | 0.597058 |
| rs2235698  | OR2H2        | 6 | 29663757 | 7 | 0.429597 |
| rs2235698  | OR2H2        | 6 | 29663757 | 1 | 5.470414 |
| rs2235698  | OR2H2        | 6 | 29663757 | 3 | 0.954311 |
| rs29230    | GABBR1       | 6 | 29684372 | 1 | 3.587337 |
| rs29230    | GABBR1       | 6 | 29684372 | 6 | 1.420168 |
| rs29230    | GABBR1       | 6 | 29684372 | 7 | 2.270316 |
| rs9468571  | MOG          | 6 | 29732873 | 4 | 2.932825 |
| rs2857766  | MOG          | 6 | 29741982 | 6 | 2.140673 |
| rs2857766  | MOG          | 6 | 29741982 | 5 | 0.291418 |
| rs2535238  | ZFP57        | 6 | 29753017 | 6 | 4.387414 |
| rs2535238  | ZFP57        | 6 | 29753017 | 4 | 3.937675 |
| rs2535238  | ZFP57        | 6 | 29753017 | 7 | 3.046287 |
| rs2747421  | ZFP57        | 6 | 29753097 | 4 | 2.525563 |
| rs2747421  | ZFP57        | 6 | 29753097 | 7 | 9.103782 |
| rs2394160  | RP3-377H14.5 | 6 | 29811241 | 6 | 3.763876 |
| rs2394160  | RP3-377H14.5 | 6 | 29811241 | 3 | 0.445715 |
| rs2394160  | RP3-377H14.5 | 6 | 29811241 | 4 | 0.846798 |
| rs2517945  | RP3-377H14.5 | 6 | 29811412 | 3 | 0.11414  |
| rs2517945  | RP3-377H14.5 | 6 | 29811412 | 6 | 0.810135 |
| rs2517945  | RP3-377H14.5 | 6 | 29811412 | 8 | 0.166063 |
| rs2517945  | RP3-377H14.5 | 6 | 29811412 | 4 | 0.52489  |
| rs2523389  | RP3-377H14.5 | 6 | 29814107 | 6 | 2.312408 |
| rs2523389  | RP3-377H14.5 | 6 | 29814107 | 3 | 0.193689 |
| rs2523389  | RP3-377H14.5 | 6 | 29814107 | 4 | 0.376655 |
| rs2523389  | RP3-377H14.5 | 6 | 29814107 | 8 | 0.521769 |
| rs1610621  | IFITM4P      | 6 | 29826769 | 7 | 1.955071 |
| rs1610621  | IFITM4P      | 6 | 29826769 | 3 | 1.88088  |
| rs1610621  | IFITM4P      | 6 | 29826769 | 6 | 3.129762 |
| rs1610621  | IFITM4P      | 6 | 29826769 | 4 | 0.346462 |
| rs17185111 | HCG4         | 6 | 29866989 | 2 | 5.087211 |
| rs3734818  | HCG4         | 6 | 29867201 | 4 | 0.782234 |
| rs3734818  | HCG4         | 6 | 29867201 | 3 | 1.252863 |

|            |        |   |          |   |          |
|------------|--------|---|----------|---|----------|
| rs1610643  | HCG4   | 6 | 29867289 | 3 | 0.474598 |
| rs1610643  | HCG4   | 6 | 29867289 | 1 | 3.366064 |
| rs1610643  | HCG4   | 6 | 29867289 | 7 | 0.904116 |
| rs1610643  | HCG4   | 6 | 29867289 | 5 | 0.569291 |
| rs1610643  | HCG4   | 6 | 29867289 | 8 | 1.989175 |
| rs17185132 | HCG4   | 6 | 29867490 | 3 | 0.498262 |
| rs17185132 | HCG4   | 6 | 29867490 | 4 | 9.03394  |
| rs7764777  | HCG4   | 6 | 29868128 | 8 | 2.645312 |
| rs7764777  | HCG4   | 6 | 29868128 | 1 | 3.789713 |
| rs7764777  | HCG4   | 6 | 29868128 | 5 | 0.956797 |
| rs1611212  | HCG4   | 6 | 29868502 | 3 | 0.808998 |
| rs1611212  | HCG4   | 6 | 29868502 | 5 | 0.424548 |
| rs1611212  | HCG4   | 6 | 29868502 | 1 | 3.26036  |
| rs1611212  | HCG4   | 6 | 29868502 | 6 | 0.477562 |
| rs1611213  | HCG4   | 6 | 29868569 | 6 | 3.244535 |
| rs1611213  | HCG4   | 6 | 29868569 | 5 | 1.034736 |
| rs1611213  | HCG4   | 6 | 29868569 | 4 | 1.494148 |
| rs1611213  | HCG4   | 6 | 29868569 | 1 | 3.73761  |
| rs1611213  | HCG4   | 6 | 29868569 | 8 | 1.929325 |
| rs1611213  | HCG4   | 6 | 29868569 | 7 | 1.698729 |
| rs1610719  | HCG4   | 6 | 29868656 | 4 | 0.906536 |
| rs1610719  | HCG4   | 6 | 29868656 | 1 | 2.757996 |
| rs1610719  | HCG4   | 6 | 29868656 | 7 | 0.492868 |
| rs1610719  | HCG4   | 6 | 29868656 | 8 | 0.26867  |
| rs1610719  | HCG4   | 6 | 29868656 | 5 | 1.278861 |
| rs1610719  | HCG4   | 6 | 29868656 | 6 | 0.390105 |
| rs1130363  | HLA-G  | 6 | 29905675 | 1 | 3.287982 |
| rs1130363  | HLA-G  | 6 | 29905675 | 2 | 2.71118  |
| rs1130363  | HLA-G  | 6 | 29905675 | 6 | 1.454004 |
| rs1130363  | HLA-G  | 6 | 29905675 | 7 | 3.086336 |
| rs1130363  | HLA-G  | 6 | 29905675 | 5 | 2.084404 |
| rs915669   | HLA-G  | 6 | 29906404 | 1 | 2.017041 |
| rs915669   | HLA-G  | 6 | 29906404 | 6 | 4.345979 |
| rs915669   | HLA-G  | 6 | 29906404 | 5 | 4.731154 |
| rs915669   | HLA-G  | 6 | 29906404 | 2 | 2.161993 |
| rs915669   | HLA-G  | 6 | 29906404 | 7 | 0.87665  |
| rs1610696  | HLA-G  | 6 | 29906782 | 7 | 0.218002 |
| rs1610696  | HLA-G  | 6 | 29906782 | 6 | 10.28397 |
| rs1610696  | HLA-G  | 6 | 29906782 | 5 | 0.890006 |
| rs1610696  | HLA-G  | 6 | 29906782 | 3 | 2.567882 |
| rs1610696  | HLA-G  | 6 | 29906782 | 8 | 6.626835 |
| rs1610696  | HLA-G  | 6 | 29906782 | 1 | 5.170949 |
| rs7768484  | HLA-H  | 6 | 29963957 | 8 | 5.237933 |
| rs7768484  | HLA-H  | 6 | 29963957 | 5 | 2.925223 |
| rs3094185  | HCG2P7 | 6 | 29975374 | 1 | 5.466797 |
| rs3094185  | HCG2P7 | 6 | 29975374 | 7 | 2.731052 |
| rs2231118  | HLA-A  | 6 | 30020831 | 3 | 0.568905 |



|           |         |   |          |   |          |
|-----------|---------|---|----------|---|----------|
| rs2231118 | HLA-A   | 6 | 30020831 | 6 | 0.297283 |
| rs2231118 | HLA-A   | 6 | 30020831 | 1 | 3.382738 |
| rs2523943 | HCG9    | 6 | 30050906 | 3 | 0.336821 |
| rs2523943 | HCG9    | 6 | 30050906 | 4 | 0.601192 |
| rs422640  | HCG9    | 6 | 30050984 | 3 | 0.252287 |
| rs6904029 | HCG9    | 6 | 30051046 | 3 | 0.107305 |
| rs6904029 | HCG9    | 6 | 30051046 | 5 | 0.06086  |
| rs6903753 | HCG9    | 6 | 30051157 | 6 | 0.838853 |
| rs6903753 | HCG9    | 6 | 30051157 | 5 | 1.367267 |
| rs6903753 | HCG9    | 6 | 30051157 | 3 | 2.50346  |
| rs2071568 | HCG9    | 6 | 30051260 | 5 | 0.901872 |
| rs2071568 | HCG9    | 6 | 30051260 | 6 | 0.190032 |
| rs2071568 | HCG9    | 6 | 30051260 | 3 | 1.207249 |
| rs7770557 | ZNRD1   | 6 | 30137088 | 8 | 4.692625 |
| rs7770557 | ZNRD1   | 6 | 30137088 | 2 | 4.118418 |
| rs7770557 | ZNRD1   | 6 | 30137088 | 3 | 0.187667 |
| rs1150738 | PPP1R11 | 6 | 30143068 | 4 | 0.677241 |
| rs1150738 | PPP1R11 | 6 | 30143068 | 3 | 0.229981 |
| rs2074482 | PPP1R11 | 6 | 30144450 | 4 | 0.172369 |
| rs2074482 | PPP1R11 | 6 | 30144450 | 5 | 0.328863 |
| rs1245371 | RNF39   | 6 | 30146331 | 8 | 1.456927 |
| rs2301753 | RNF39   | 6 | 30147219 | 4 | 3.878175 |
| rs2301753 | RNF39   | 6 | 30147219 | 8 | 0.942215 |
| rs2301753 | RNF39   | 6 | 30147219 | 5 | 5.902641 |
| rs2301753 | RNF39   | 6 | 30147219 | 2 | 3.769447 |
| rs1116221 | TRIM31  | 6 | 30179309 | 7 | 1.890847 |
| rs1116221 | TRIM31  | 6 | 30179309 | 6 | 1.358674 |
| rs1116221 | TRIM31  | 6 | 30179309 | 4 | 0.653017 |
| rs3132679 | TRIM31  | 6 | 30183822 | 1 | 5.441594 |
| rs3132679 | TRIM31  | 6 | 30183822 | 3 | 0.799692 |
| rs3132679 | TRIM31  | 6 | 30183822 | 7 | 0.375956 |
| rs2023472 | TRIM31  | 6 | 30183843 | 7 | 0.313616 |
| rs2023472 | TRIM31  | 6 | 30183843 | 4 | 0.896011 |
| rs2523989 | TRIM31  | 6 | 30186254 | 4 | 1.013901 |
| rs2523989 | TRIM31  | 6 | 30186254 | 3 | 2.11398  |
| rs2239529 | TRIM31  | 6 | 30186309 | 4 | 0.310277 |
| rs2239529 | TRIM31  | 6 | 30186309 | 3 | 1.279643 |
| rs3734838 | TRIM31  | 6 | 30188210 | 5 | 1.028557 |
| rs3734838 | TRIM31  | 6 | 30188210 | 7 | 2.032822 |
| rs2517598 | TRIM31  | 6 | 30188253 | 3 | 2.173816 |
| rs2517598 | TRIM31  | 6 | 30188253 | 4 | 0.3796   |
| rs2844793 | TRIM31  | 6 | 30188475 | 3 | 1.579988 |
| rs2844793 | TRIM31  | 6 | 30188475 | 4 | 0.500933 |
| rs757262  | TRIM40  | 6 | 30222934 | 5 | 0.387713 |
| rs9261530 | TRIM10  | 6 | 30228143 | 4 | 0.081598 |
| rs2857433 | TRIM10  | 6 | 30228612 | 5 | 0.016503 |
| rs2857433 | TRIM10  | 6 | 30228612 | 4 | 0.219103 |

|           |          |   |          |   |          |
|-----------|----------|---|----------|---|----------|
| rs2857433 | TRIM10   | 6 | 30228612 | 6 | 0.761228 |
| rs2285795 | TRIM10   | 6 | 30228891 | 4 | 1.930476 |
| rs2285795 | TRIM10   | 6 | 30228891 | 5 | 2.757487 |
| rs9261532 | TRIM10   | 6 | 30228924 | 5 | 1.075576 |
| rs9261532 | TRIM10   | 6 | 30228924 | 6 | 3.048885 |
| rs3734840 | TRIM10   | 6 | 30229584 | 8 | 1.04512  |
| rs2523733 | TRIM15   | 6 | 30239494 | 3 | 0.306485 |
| rs2523733 | TRIM15   | 6 | 30239494 | 7 | 1.365302 |
| rs929156  | TRIM15   | 6 | 30247678 | 4 | 1.399091 |
| rs929156  | TRIM15   | 6 | 30247678 | 6 | 0.45156  |
| rs929156  | TRIM15   | 6 | 30247678 | 5 | 0.56657  |
| rs1063280 | TRIM15   | 6 | 30248321 | 3 | 0.031024 |
| rs1063280 | TRIM15   | 6 | 30248321 | 1 | 1.576773 |
| rs2523721 | TRIM26   | 6 | 30274245 | 3 | 0.052247 |
| rs2072107 | TRIM26   | 6 | 30274914 | 5 | 1.231697 |
| rs2072107 | TRIM26   | 6 | 30274914 | 2 | 4.934049 |
| rs3094615 | TRIM26   | 6 | 30289096 | 4 | 0.503323 |
| rs3094615 | TRIM26   | 6 | 30289096 | 6 | 1.330875 |
| rs3094615 | TRIM26   | 6 | 30289096 | 8 | 1.964847 |
| rs3094615 | TRIM26   | 6 | 30289096 | 3 | 0.172647 |
| rs3094615 | TRIM26   | 6 | 30289096 | 5 | 0.233539 |
| rs9391806 | FLJ45422 | 6 | 30335376 | 1 | 0.622065 |
| rs9391806 | FLJ45422 | 6 | 30335376 | 3 | 0.143062 |
| rs2023477 | FLJ45422 | 6 | 30337442 | 1 | 3.510652 |
| rs2023477 | FLJ45422 | 6 | 30337442 | 4 | 0.25726  |
| rs2023477 | FLJ45422 | 6 | 30337442 | 6 | 0.770656 |
| rs2023477 | FLJ45422 | 6 | 30337442 | 3 | 0.976213 |
| rs2523746 | FLJ45422 | 6 | 30338064 | 6 | 1.114616 |
| rs2523746 | FLJ45422 | 6 | 30338064 | 3 | 0.616186 |
| rs2523746 | FLJ45422 | 6 | 30338064 | 1 | 4.438439 |
| rs2523746 | FLJ45422 | 6 | 30338064 | 4 | 0.601737 |
| rs2523746 | FLJ45422 | 6 | 30338064 | 8 | 0.07381  |
| rs2516700 | FLJ45422 | 6 | 30339050 | 4 | 1.860872 |
| rs2516700 | FLJ45422 | 6 | 30339050 | 8 | 5.63213  |
| rs2516700 | FLJ45422 | 6 | 30339050 | 3 | 0.80445  |
| rs2516700 | FLJ45422 | 6 | 30339050 | 6 | 1.803058 |
| rs2516700 | FLJ45422 | 6 | 30339050 | 1 | 5.206606 |
| rs2516697 | FLJ45422 | 6 | 30340493 | 4 | 1.060964 |
| rs2516697 | FLJ45422 | 6 | 30340493 | 1 | 5.355453 |
| rs2516697 | FLJ45422 | 6 | 30340493 | 6 | 0.500072 |
| rs2516697 | FLJ45422 | 6 | 30340493 | 8 | 1.087562 |
| rs2516697 | FLJ45422 | 6 | 30340493 | 3 | 1.268111 |
| rs2844765 | FLJ45422 | 6 | 30342473 | 8 | 0.649134 |
| rs2844765 | FLJ45422 | 6 | 30342473 | 6 | 0.299718 |
| rs2844765 | FLJ45422 | 6 | 30342473 | 1 | 4.544555 |
| rs2844765 | FLJ45422 | 6 | 30342473 | 4 | 0.760226 |
| rs2844765 | FLJ45422 | 6 | 30342473 | 3 | 0.67213  |

|               |          |   |          |   |          |
|---------------|----------|---|----------|---|----------|
| rs2844764     | FLJ45422 | 6 | 30342647 | 4 | 0.742889 |
| rs2844764     | FLJ45422 | 6 | 30342647 | 8 | 0.338159 |
| rs2844764     | FLJ45422 | 6 | 30342647 | 6 | 0.05115  |
| rs2844764     | FLJ45422 | 6 | 30342647 | 3 | 0.441704 |
| rs2844764     | FLJ45422 | 6 | 30342647 | 1 | 4.900828 |
| rs5030609     | TRIM39   | 6 | 30404660 | 3 | 0.89169  |
| rs5030609     | TRIM39   | 6 | 30404660 | 4 | 0.316236 |
| rs5030609     | TRIM39   | 6 | 30404660 | 8 | 3.01705  |
| rs5030609     | TRIM39   | 6 | 30404660 | 1 | 6.040103 |
| rs5030609     | TRIM39   | 6 | 30404660 | 6 | 0.48146  |
| rs2844750     | RPP21    | 6 | 30421247 | 5 | 0.099676 |
| rs2844750     | RPP21    | 6 | 30421247 | 4 | 0.075619 |
| rs2844750     | RPP21    | 6 | 30421247 | 6 | 3.640887 |
| rs6986        | RPP21    | 6 | 30421319 | 2 | 0.498867 |
| rs6986        | RPP21    | 6 | 30421319 | 3 | 0.700412 |
| rs6986        | RPP21    | 6 | 30421319 | 5 | 0.521796 |
| rs2074505     | GNL1     | 6 | 30629116 | 2 | 1.248485 |
| rs3132594     | C6orf136 | 6 | 30723239 | 7 | 3.244956 |
| rs9262152     | MDC1     | 6 | 30788895 | 5 | 4.083941 |
| rs8233        | TUBB     | 6 | 30800944 | 7 | 6.517172 |
| rs3094124     | IER3     | 6 | 30819784 | 2 | 8.128737 |
| rs2229933     | DDR1     | 6 | 30965051 | 6 | 6.033045 |
| rs2229933     | DDR1     | 6 | 30965051 | 7 | 0.289292 |
| rs2229933     | DDR1     | 6 | 30965051 | 3 | 0.452269 |
| rs2229933     | DDR1     | 6 | 30965051 | 1 | 4.009228 |
| rs1264319     | DDR1     | 6 | 30970402 | 7 | 4.175538 |
| rs2230121     | GTF2H4   | 6 | 30988190 | 8 | 7.760701 |
| rs1264305     | VARS2    | 6 | 30990256 | 2 | 3.829815 |
| rs1264305     | VARS2    | 6 | 30990256 | 3 | 0.216624 |
| rs1264305     | VARS2    | 6 | 30990256 | 6 | 2.05926  |
| rs1264305     | VARS2    | 6 | 30990256 | 1 | 0.45855  |
| rs1264303     | VARS2    | 6 | 30990492 | 6 | 2.68724  |
| rs1264303     | VARS2    | 6 | 30990492 | 1 | 1.785733 |
| rs1264303     | VARS2    | 6 | 30990492 | 2 | 2.144776 |
| rs1264303     | VARS2    | 6 | 30990492 | 3 | 2.578167 |
| rs6926224     | VARS2    | 6 | 30990668 | 2 | 5.39205  |
| rs2249459     | VARS2    | 6 | 30995967 | 3 | 0.314858 |
| rs2517468     | VARS2    | 6 | 30996148 | 3 | 0.348159 |
| rs2517468     | VARS2    | 6 | 30996148 | 1 | 0.61731  |
| rs2517468     | VARS2    | 6 | 30996148 | 6 | 2.267545 |
| rs2074511     | VARS2    | 6 | 30997368 | 6 | 5.586611 |
| rs2074511     | VARS2    | 6 | 30997368 | 7 | 6.854531 |
| rs2074511     | VARS2    | 6 | 30997368 | 1 | 3.635663 |
| SNP6-30997382 | VARS2    | 6 | 30997382 | 3 | 0.104269 |
| rs2532942     | VARS2    | 6 | 31000301 | 2 | 1.120979 |
| rs2532942     | VARS2    | 6 | 31000301 | 1 | 0.72112  |
| rs2532942     | VARS2    | 6 | 31000301 | 3 | 0.223657 |

|            |           |   |          |   |          |
|------------|-----------|---|----------|---|----------|
| rs3131787  | SFTPG     | 6 | 31007503 | 3 | 2.117014 |
| rs2286656  | SFTPG     | 6 | 31007550 | 1 | 4.467406 |
| rs2286656  | SFTPG     | 6 | 31007550 | 7 | 0.861366 |
| rs3132580  | DPCR1     | 6 | 31028103 | 3 | 4.147096 |
| rs2240804  | DPCR1     | 6 | 31028869 | 6 | 0.55565  |
| rs2240804  | DPCR1     | 6 | 31028869 | 3 | 1.402124 |
| rs2240804  | DPCR1     | 6 | 31028869 | 1 | 0.808617 |
| rs2240804  | DPCR1     | 6 | 31028869 | 2 | 4.033325 |
| rs2240803  | DPCR1     | 6 | 31028936 | 1 | 4.992154 |
| rs2240803  | DPCR1     | 6 | 31028936 | 7 | 0.118787 |
| rs12190030 | DPCR1     | 6 | 31029343 | 2 | 0.194717 |
| rs12190030 | DPCR1     | 6 | 31029343 | 1 | 0.499473 |
| rs2844697  | LOC646570 | 6 | 31040288 | 7 | 0.376376 |
| rs2517416  | C6orf205  | 6 | 31063908 | 1 | 4.763534 |
| rs2517416  | C6orf205  | 6 | 31063908 | 6 | 2.719758 |
| rs2517416  | C6orf205  | 6 | 31063908 | 5 | 1.789352 |
| rs886403   | C6orf205  | 6 | 31065597 | 8 | 2.167862 |
| rs886403   | C6orf205  | 6 | 31065597 | 3 | 1.960259 |
| rs2517554  | LOC729788 | 6 | 31101478 | 4 | 2.262329 |
| rs2517554  | LOC729788 | 6 | 31101478 | 1 | 1.412442 |
| rs2517554  | LOC729788 | 6 | 31101478 | 7 | 0.721548 |
| rs2517554  | LOC729788 | 6 | 31101478 | 6 | 1.916835 |
| rs2523898  | LOC729788 | 6 | 31101512 | 1 | 1.562685 |
| rs2523898  | LOC729788 | 6 | 31101512 | 5 | 1.484127 |
| rs2523898  | LOC729788 | 6 | 31101512 | 8 | 0.929335 |
| rs2523898  | LOC729788 | 6 | 31101512 | 4 | 1.021504 |
| rs2523898  | LOC729788 | 6 | 31101512 | 3 | 1.314464 |
| rs4713420  | LOC729788 | 6 | 31101546 | 5 | 0.799847 |
| rs12110470 | LOC729792 | 6 | 31105795 | 1 | 0.692742 |
| rs12110470 | LOC729792 | 6 | 31105795 | 8 | 1.224705 |
| rs12110785 | LOC729792 | 6 | 31105803 | 1 | 0.851759 |
| rs12110785 | LOC729792 | 6 | 31105803 | 3 | 0.416858 |
| rs3132555  | CDSN      | 6 | 31190889 | 1 | 4.842176 |
| rs3132555  | CDSN      | 6 | 31190889 | 8 | 5.560504 |
| rs3132555  | CDSN      | 6 | 31190889 | 6 | 1.038507 |
| rs3132555  | CDSN      | 6 | 31190889 | 5 | 7.279891 |
| rs3095298  | CDSN      | 6 | 31190911 | 5 | 3.55465  |
| rs3095298  | CDSN      | 6 | 31190911 | 4 | 0.522419 |
| rs3095298  | CDSN      | 6 | 31190911 | 2 | 4.016227 |
| rs3130982  | CDSN      | 6 | 31192054 | 4 | 8.346515 |
| rs3130982  | CDSN      | 6 | 31192054 | 1 | 1.659041 |
| rs3130982  | CDSN      | 6 | 31192054 | 2 | 6.159658 |
| rs3094215  | CDSN      | 6 | 31192663 | 6 | 3.491166 |
| rs3094215  | CDSN      | 6 | 31192663 | 2 | 0.081793 |
| rs3094215  | CDSN      | 6 | 31192663 | 1 | 0.525516 |
| rs3094215  | CDSN      | 6 | 31192663 | 4 | 3.508181 |
| rs3130983  | CDSN      | 6 | 31192771 | 4 | 7.376431 |

|               |          |   |          |   |          |
|---------------|----------|---|----------|---|----------|
| rs3130983     | CDSN     | 6 | 31192771 | 6 | 7.631348 |
| rs3130983     | CDSN     | 6 | 31192771 | 1 | 0.355958 |
| rs3130983     | CDSN     | 6 | 31192771 | 2 | 0.65546  |
| rs3132552     | CDSN     | 6 | 31193248 | 5 | 2.136399 |
| rs3132552     | CDSN     | 6 | 31193248 | 6 | 2.881702 |
| rs3132552     | CDSN     | 6 | 31193248 | 8 | 4.437911 |
| rs3132552     | CDSN     | 6 | 31193248 | 1 | 5.779765 |
| rs3095318     | CDSN     | 6 | 31196124 | 8 | 1.358589 |
| rs3095318     | CDSN     | 6 | 31196124 | 5 | 0.974522 |
| rs3815087     | PSORS1C1 | 6 | 31201566 | 1 | 4.817866 |
| rs3815087     | PSORS1C1 | 6 | 31201566 | 3 | 0.359228 |
| rs1265099     | PSORS1C2 | 6 | 31213392 | 3 | 0.990782 |
| rs1265099     | PSORS1C2 | 6 | 31213392 | 4 | 1.204301 |
| rs1265099     | PSORS1C2 | 6 | 31213392 | 5 | 0.21738  |
| rs1265099     | PSORS1C2 | 6 | 31213392 | 1 | 3.068477 |
| rs2074478     | PSORS1C2 | 6 | 31213612 | 3 | 0.745086 |
| rs2074478     | PSORS1C2 | 6 | 31213612 | 7 | 2.039198 |
| rs2074478     | PSORS1C2 | 6 | 31213612 | 6 | 0.786633 |
| rs2233954     | PSORS1C2 | 6 | 31213651 | 7 | 0.172157 |
| rs9263726     | PSORS1C1 | 6 | 31214478 | 5 | 3.303627 |
| rs9263726     | PSORS1C1 | 6 | 31214478 | 8 | 3.52272  |
| rs9263726     | PSORS1C1 | 6 | 31214478 | 7 | 0.661936 |
| rs9263726     | PSORS1C1 | 6 | 31214478 | 4 | 3.373923 |
| rs9263726     | PSORS1C1 | 6 | 31214478 | 1 | 5.323917 |
| SNP6-31215627 | PSORS1C1 | 6 | 31215627 | 5 | 8.885405 |
| SNP6-31215627 | PSORS1C1 | 6 | 31215627 | 4 | 1.075938 |
| SNP6-31215627 | PSORS1C1 | 6 | 31215627 | 1 | 2.036981 |
| SNP6-31215627 | PSORS1C1 | 6 | 31215627 | 8 | 3.948604 |
| SNP6-31215627 | PSORS1C1 | 6 | 31215627 | 7 | 1.176372 |
| SNP6-31215627 | PSORS1C1 | 6 | 31215627 | 2 | 3.784748 |
| rs1576        | CCHCR1   | 6 | 31218370 | 8 | 0.817787 |
| rs1576        | CCHCR1   | 6 | 31218370 | 3 | 0.163653 |
| rs1576        | CCHCR1   | 6 | 31218370 | 7 | 0.523535 |
| rs1576        | CCHCR1   | 6 | 31218370 | 2 | 5.155782 |
| rs1576        | CCHCR1   | 6 | 31218370 | 1 | 0.159176 |
| rs1576        | CCHCR1   | 6 | 31218370 | 5 | 0.590596 |
| rs1576        | CCHCR1   | 6 | 31218370 | 6 | 1.282572 |
| rs130079      | CCHCR1   | 6 | 31220716 | 2 | 5.039201 |
| rs130079      | CCHCR1   | 6 | 31220716 | 7 | 5.597126 |
| rs130079      | CCHCR1   | 6 | 31220716 | 3 | 0.001434 |
| rs2027937     | CCHCR1   | 6 | 31224481 | 3 | 0.690866 |
| rs2027937     | CCHCR1   | 6 | 31224481 | 6 | 5.187368 |
| rs130066      | CCHCR1   | 6 | 31230294 | 7 | 4.9839   |
| rs130066      | CCHCR1   | 6 | 31230294 | 6 | 5.065628 |
| rs130077      | CCHCR1   | 6 | 31230309 | 2 | 0.539889 |
| rs130077      | CCHCR1   | 6 | 31230309 | 8 | 1.147658 |
| rs130077      | CCHCR1   | 6 | 31230309 | 1 | 0.524933 |

|               |           |   |          |   |          |
|---------------|-----------|---|----------|---|----------|
| rs130077      | CCHCR1    | 6 | 31230309 | 4 | 0.145501 |
| rs130077      | CCHCR1    | 6 | 31230309 | 5 | 1.636733 |
| rs130076      | CCHCR1    | 6 | 31230461 | 3 | 0.434242 |
| rs3130453     | CCHCR1    | 6 | 31232828 | 6 | 0.708787 |
| rs3130453     | CCHCR1    | 6 | 31232828 | 7 | 0.763893 |
| rs3130453     | CCHCR1    | 6 | 31232828 | 4 | 0.367917 |
| rs3130453     | CCHCR1    | 6 | 31232828 | 2 | 5.994319 |
| SNP6-31233236 | CCHCR1    | 6 | 31233236 | 1 | 5.647035 |
| SNP6-31233236 | CCHCR1    | 6 | 31233236 | 5 | 0.085989 |
| SNP6-31233236 | CCHCR1    | 6 | 31233236 | 6 | 0.849417 |
| rs12529697    | CCHCR1    | 6 | 31233386 | 3 | 1.55202  |
| rs3130932     | POU5F1    | 6 | 31241922 | 8 | 4.218988 |
| rs3130932     | POU5F1    | 6 | 31241922 | 5 | 5.851244 |
| rs3130932     | POU5F1    | 6 | 31241922 | 6 | 3.643964 |
| rs3130932     | POU5F1    | 6 | 31241922 | 1 | 4.154361 |
| rs9263872     | HCG27     | 6 | 31278587 | 7 | 0.002365 |
| rs9263872     | HCG27     | 6 | 31278587 | 5 | 3.027311 |
| rs9263872     | HCG27     | 6 | 31278587 | 4 | 6.985391 |
| rs9263872     | HCG27     | 6 | 31278587 | 1 | 4.543991 |
| rs9263872     | HCG27     | 6 | 31278587 | 3 | 0.80742  |
| rs9263875     | HCG27     | 6 | 31278893 | 5 | 3.543441 |
| rs9263875     | HCG27     | 6 | 31278893 | 8 | 5.196551 |
| rs9263875     | HCG27     | 6 | 31278893 | 3 | 0.396463 |
| rs1049281     | HLA-C     | 6 | 31344546 | 7 | 0.291486 |
| rs1049281     | HLA-C     | 6 | 31344546 | 1 | 4.171242 |
| SNP6-31346238 | HLA-C     | 6 | 31346238 | 8 | 1.867522 |
| SNP6-31346238 | HLA-C     | 6 | 31346238 | 1 | 2.519702 |
| rs1140546     | HLA-B     | 6 | 31430867 | 7 | 0.375563 |
| rs1140546     | HLA-B     | 6 | 31430867 | 2 | 0.39407  |
| rs9501572     | LOC729816 | 6 | 31441799 | 2 | 0.470713 |
| rs9501572     | LOC729816 | 6 | 31441799 | 4 | 1.838634 |
| rs9501572     | LOC729816 | 6 | 31441799 | 8 | 1.197834 |
| rs9501572     | LOC729816 | 6 | 31441799 | 7 | 1.197798 |
| rs9501572     | LOC729816 | 6 | 31441799 | 6 | 1.289797 |
| rs9266379     | LOC729816 | 6 | 31442160 | 5 | 0.139438 |
| rs9266379     | LOC729816 | 6 | 31442160 | 1 | 1.433602 |
| rs9266379     | LOC729816 | 6 | 31442160 | 3 | 1.630593 |
| rs2596427     | LOC729816 | 6 | 31442372 | 3 | 1.87284  |
| rs2844519     | MICA      | 6 | 31479409 | 6 | 0.744854 |
| rs9380254     | MICA      | 6 | 31486314 | 5 | 0.688702 |
| rs1131896     | MICA      | 6 | 31487094 | 7 | 0.056277 |
| rs1131896     | MICA      | 6 | 31487094 | 3 | 1.106762 |
| rs1131896     | MICA      | 6 | 31487094 | 5 | 0.541131 |
| rs1131896     | MICA      | 6 | 31487094 | 1 | 2.168164 |
| rs1131896     | MICA      | 6 | 31487094 | 8 | 0.274288 |
| SNP6-31540061 | HCP5      | 6 | 31540061 | 8 | 4.965635 |
| rs11757571    | HCP5      | 6 | 31540766 | 1 | 4.087944 |

|               |          |   |          |   |          |
|---------------|----------|---|----------|---|----------|
| rs11757602    | HCP5     | 6 | 31540781 | 1 | 4.17834  |
| rs9267143     | 3.8-1    | 6 | 31547816 | 4 | 0.532134 |
| rs9267143     | 3.8-1    | 6 | 31547816 | 6 | 0.89937  |
| rs9267146     | 3.8-1    | 6 | 31547873 | 6 | 1.466056 |
| rs9267146     | 3.8-1    | 6 | 31547873 | 4 | 0.157208 |
| rs9267147     | 3.8-1    | 6 | 31547903 | 4 | 3.549259 |
| rs9267147     | 3.8-1    | 6 | 31547903 | 6 | 2.592518 |
| rs14597       | 3.8-1    | 6 | 31547993 | 5 | 0.703346 |
| rs14597       | 3.8-1    | 6 | 31547993 | 4 | 1.039606 |
| rs14597       | 3.8-1    | 6 | 31547993 | 2 | 0.7471   |
| rs14597       | 3.8-1    | 6 | 31547993 | 7 | 0.436797 |
| rs14597       | 3.8-1    | 6 | 31547993 | 1 | 1.01309  |
| rs3131639     | MICB     | 6 | 31581525 | 4 | 2.982091 |
| rs2516480     | MCCD1    | 6 | 31604770 | 3 | 0.171658 |
| rs1129640     | BAT1     | 6 | 31614603 | 7 | 1.071649 |
| rs1129640     | BAT1     | 6 | 31614603 | 6 | 1.419713 |
| rs2239527     | BAT1     | 6 | 31617758 | 4 | 1.520441 |
| rs2239527     | BAT1     | 6 | 31617758 | 1 | 0.062381 |
| rs2239528     | BAT1     | 6 | 31618084 | 4 | 0.86932  |
| rs2239528     | BAT1     | 6 | 31618084 | 7 | 0.656064 |
| rs2071594     | ATP6V1G2 | 6 | 31620699 | 1 | 0.169832 |
| rs2071594     | ATP6V1G2 | 6 | 31620699 | 4 | 0.484667 |
| rs2071593     | ATP6V1G2 | 6 | 31620778 | 6 | 0.177644 |
| rs2071593     | ATP6V1G2 | 6 | 31620778 | 4 | 0.268689 |
| SNP6-31633891 | NFKBIL1  | 6 | 31633891 | 6 | 4.681807 |
| rs2229094     | LTA      | 6 | 31648535 | 3 | 0.650624 |
| rs1041981     | LTA      | 6 | 31648763 | 1 | 0.445051 |
| rs1052248     | LST1     | 6 | 31664560 | 3 | 0.178376 |
| rs1052248     | LST1     | 6 | 31664560 | 4 | 0.007616 |
| rs1052248     | LST1     | 6 | 31664560 | 7 | 0.056578 |
| rs3087617     | LST1     | 6 | 31664635 | 4 | 0.662654 |
| rs3179003     | NCR3     | 6 | 31664907 | 1 | 1.323882 |
| rs34816476    | NCR3     | 6 | 31665360 | 4 | 0.645521 |
| rs2259571     | AIF1     | 6 | 31691806 | 3 | 0.094449 |
| rs11538264    | BAT2     | 6 | 31711168 | 2 | 8.472908 |
| rs11538264    | BAT2     | 6 | 31711168 | 7 | 0.99696  |
| rs35502919    | BAT2     | 6 | 31712334 | 4 | 3.384364 |
| rs2295665     | BAT4     | 6 | 31740665 | 6 | 6.541286 |
| rs2295665     | BAT4     | 6 | 31740665 | 5 | 4.830755 |
| rs2295665     | BAT4     | 6 | 31740665 | 1 | 6.501414 |
| SNP6-31740878 | BAT4     | 6 | 31740878 | 2 | 1.6264   |
| SNP6-31740878 | BAT4     | 6 | 31740878 | 7 | 0.292062 |
| rs11758242    | LY6G5B   | 6 | 31747824 | 2 | 5.967189 |
| rs11758242    | LY6G5B   | 6 | 31747824 | 7 | 0.735455 |
| rs9267532     | LY6G5B   | 6 | 31747958 | 3 | 1.183388 |
| rs9267532     | LY6G5B   | 6 | 31747958 | 8 | 0.65425  |
| rs9267535     | LY6G5C   | 6 | 31757128 | 8 | 8.917852 |

|            |         |   |          |   |          |
|------------|---------|---|----------|---|----------|
| rs9267535  | LY6G5C  | 6 | 31757128 | 3 | 0.308765 |
| rs11552114 | BAT5    | 6 | 31768827 | 2 | 5.6675   |
| rs11552114 | BAT5    | 6 | 31768827 | 7 | 0.209793 |
| rs9267547  | C6orf21 | 6 | 31783480 | 2 | 1.491389 |
| rs9267547  | C6orf21 | 6 | 31783480 | 3 | 0.209157 |
| rs9267547  | C6orf21 | 6 | 31783480 | 8 | 1.355576 |
| rs2242653  | C6orf21 | 6 | 31783744 | 5 | 1.825227 |
| rs2242653  | C6orf21 | 6 | 31783744 | 1 | 0.706024 |
| rs453098   | C6orf25 | 6 | 31799636 | 3 | 0.933986 |
| rs9267551  | DDAH2   | 6 | 31805936 | 5 | 2.154352 |
| rs28381349 | MSH5    | 6 | 31817024 | 7 | 0.936136 |
| rs28381349 | MSH5    | 6 | 31817024 | 2 | 2.340286 |
| rs1802127  | MSH5    | 6 | 31837904 | 7 | 4.649059 |
| rs1802127  | MSH5    | 6 | 31837904 | 2 | 6.94295  |
| rs2075799  | HSPA1L  | 6 | 31886508 | 2 | 4.14926  |
| rs2075799  | HSPA1L  | 6 | 31886508 | 7 | 0.514144 |
| rs2075799  | HSPA1L  | 6 | 31886508 | 3 | 0.056441 |
| rs733539   | C6orf48 | 6 | 31915468 | 1 | 3.78996  |
| rs13118    | NEU1    | 6 | 31935265 | 3 | 0.238318 |
| rs2242664  | SLC44A4 | 6 | 31947310 | 8 | 0.592555 |
| rs2242664  | SLC44A4 | 6 | 31947310 | 1 | 1.250651 |
| rs2075798  | SLC44A4 | 6 | 31954720 | 3 | 0.317923 |
| rs2075798  | SLC44A4 | 6 | 31954720 | 6 | 1.655587 |
| rs7887     | EHMT2   | 6 | 31972526 | 5 | 0.466189 |
| rs7887     | EHMT2   | 6 | 31972526 | 7 | 0.26301  |
| rs7887     | EHMT2   | 6 | 31972526 | 8 | 3.616627 |
| rs7887     | EHMT2   | 6 | 31972526 | 4 | 0.044376 |
| rs7887     | EHMT2   | 6 | 31972526 | 1 | 2.898771 |
| rs2844455  | ZBTB12  | 6 | 31977652 | 1 | 0.565691 |
| rs2844455  | ZBTB12  | 6 | 31977652 | 4 | 0.432157 |
| rs2844455  | ZBTB12  | 6 | 31977652 | 5 | 0.676948 |
| rs2844455  | ZBTB12  | 6 | 31977652 | 8 | 0.815516 |
| rs9332739  | C2      | 6 | 32011783 | 1 | 3.509265 |
| rs1042663  | C2      | 6 | 32013109 | 5 | 0.032785 |
| rs4151667  | CFB     | 6 | 32022003 | 1 | 3.662046 |
| rs4151669  | CFB     | 6 | 32023123 | 1 | 3.962209 |
| rs4151651  | CFB     | 6 | 32023593 | 8 | 4.053211 |
| rs4151672  | CFB     | 6 | 32027809 | 1 | 3.72648  |
| rs17201466 | SKIV2L  | 6 | 32034579 | 3 | 1.212129 |
| rs17201466 | SKIV2L  | 6 | 32034579 | 6 | 1.751781 |
| rs17201466 | SKIV2L  | 6 | 32034579 | 4 | 1.28546  |
| rs438999   | SKIV2L  | 6 | 32036285 | 5 | 0.82932  |
| rs2734331  | SKIV2L  | 6 | 32038330 | 7 | 0.841112 |
| rs2734331  | SKIV2L  | 6 | 32038330 | 2 | 2.090608 |
| rs410851   | SKIV2L  | 6 | 32044647 | 6 | 0.229528 |
| rs410851   | SKIV2L  | 6 | 32044647 | 5 | 0.975968 |
| rs410851   | SKIV2L  | 6 | 32044647 | 8 | 4.087813 |



|               |         |   |          |   |          |
|---------------|---------|---|----------|---|----------|
| rs449643      | SKIV2L  | 6 | 32044658 | 2 | 4.769499 |
| rs449643      | SKIV2L  | 6 | 32044658 | 5 | 0.011778 |
| rs11970671    | CYP21A2 | 6 | 32115844 | 3 | 0.867362 |
| rs4713498     | TNXB    | 6 | 32119295 | 5 | 0.262821 |
| rs4713498     | TNXB    | 6 | 32119295 | 3 | 1.052797 |
| rs2894232     | TNXB    | 6 | 32119623 | 5 | 0.550365 |
| rs185819      | TNXB    | 6 | 32158045 | 3 | 0.311254 |
| rs185819      | TNXB    | 6 | 32158045 | 5 | 0.258126 |
| rs2228628     | CREBL1  | 6 | 32196832 | 4 | 9.779285 |
| rs35580488    | FKBPL   | 6 | 32205399 | 5 | 4.541994 |
| rs169494      | FKBPL   | 6 | 32205854 | 2 | 2.46671  |
| SNP6-32230450 | PPT2    | 6 | 32230450 | 8 | 8.032209 |
| SNP6-32230450 | PPT2    | 6 | 32230450 | 3 | 0.454533 |
| rs41268924    | EGFL8   | 6 | 32243115 | 4 | 2.879975 |
| rs1061807     | AGPAT1  | 6 | 32244816 | 1 | 2.428515 |
| rs3130349     | RNF5    | 6 | 32255674 | 8 | 2.344494 |
| rs3130349     | RNF5    | 6 | 32255674 | 3 | 0.275192 |
| rs2070600     | AGER    | 6 | 32259421 | 4 | 0.334457 |
| rs1800684     | AGER    | 6 | 32259972 | 6 | 5.721009 |
| rs1800684     | AGER    | 6 | 32259972 | 5 | 5.254975 |
| rs8192583     | NOTCH4  | 6 | 32271252 | 8 | 5.948467 |
| rs520803      | NOTCH4  | 6 | 32296581 | 8 | 0.679716 |
| rs520803      | NOTCH4  | 6 | 32296581 | 1 | 2.270864 |
| rs520803      | NOTCH4  | 6 | 32296581 | 7 | 1.082411 |
| rs520692      | NOTCH4  | 6 | 32296618 | 8 | 1.937816 |
| rs520692      | NOTCH4  | 6 | 32296618 | 1 | 3.566247 |
| rs520692      | NOTCH4  | 6 | 32296618 | 7 | 1.88807  |
| rs415929      | NOTCH4  | 6 | 32297010 | 1 | 0.847137 |
| rs415929      | NOTCH4  | 6 | 32297010 | 8 | 0.292109 |
| rs443198      | NOTCH4  | 6 | 32298384 | 8 | 0.873459 |
| rs367398      | NOTCH4  | 6 | 32299708 | 1 | 1.820321 |
| rs16870005    | C6orf10 | 6 | 32369131 | 2 | 0.294693 |
| rs3749966     | C6orf10 | 6 | 32369485 | 2 | 2.491375 |
| rs3129941     | C6orf10 | 6 | 32445664 | 1 | 0.652578 |
| rs3129941     | C6orf10 | 6 | 32445664 | 5 | 1.270944 |
| rs3129941     | C6orf10 | 6 | 32445664 | 8 | 0.663529 |
| rs3129941     | C6orf10 | 6 | 32445664 | 2 | 1.049398 |
| rs2076523     | BTNL2   | 6 | 32478813 | 8 | 1.730033 |
| rs2076523     | BTNL2   | 6 | 32478813 | 2 | 2.212424 |
| rs14004       | HLA-DRA | 6 | 32515687 | 1 | 0.569672 |
| rs14004       | HLA-DRA | 6 | 32515687 | 5 | 0.207664 |
| rs3135391     | HLA-DRA | 6 | 32518965 | 6 | 0.416032 |
| rs3135391     | HLA-DRA | 6 | 32518965 | 1 | 2.252944 |
| rs3135391     | HLA-DRA | 6 | 32518965 | 5 | 0.157946 |
| rs8084        | HLA-DRA | 6 | 32519013 | 8 | 6.43066  |
| rs8084        | HLA-DRA | 6 | 32519013 | 1 | 0.537741 |
| rs8084        | HLA-DRA | 6 | 32519013 | 6 | 0.028224 |

|               |          |   |          |   |          |
|---------------|----------|---|----------|---|----------|
| rs8084        | HLA-DRA  | 6 | 32519013 | 5 | 0.439873 |
| rs8084        | HLA-DRA  | 6 | 32519013 | 2 | 0.078775 |
| rs3177928     | HLA-DRA  | 6 | 32520413 | 6 | 0.117085 |
| rs7196        | HLA-DRA  | 6 | 32520549 | 6 | 0.140709 |
| rs7196        | HLA-DRA  | 6 | 32520549 | 5 | 5.750274 |
| rs7196        | HLA-DRA  | 6 | 32520549 | 1 | 1.569724 |
| rs7196        | HLA-DRA  | 6 | 32520549 | 2 | 4.600678 |
| SNP6-32595220 | HLA-DRB5 | 6 | 32595220 | 5 | 5.68748  |
| SNP6-32605940 | HLA-DRB5 | 6 | 32605940 | 6 | 3.886395 |
| SNP6-32605940 | HLA-DRB5 | 6 | 32605940 | 1 | 3.602057 |
| SNP6-32605940 | HLA-DRB5 | 6 | 32605940 | 5 | 1.96293  |
| rs9269693     | HLA-DRB1 | 6 | 32654844 | 1 | 1.514011 |
| rs35445101    | HLA-DRB1 | 6 | 32654857 | 1 | 0.338714 |
| rs35445101    | HLA-DRB1 | 6 | 32654857 | 7 | 1.390151 |
| rs12722042    | HLA-DQA1 | 6 | 32713287 | 2 | 0.321    |
| SNP6-32717104 | HLA-DQA1 | 6 | 32717104 | 1 | 0.905826 |
| rs707952      | HLA-DQA1 | 6 | 32717784 | 7 | 2.319698 |
| rs1130399     | HLA-DQB1 | 6 | 32737733 | 1 | 0.717207 |
| SNP6-32740576 | HLA-DQB1 | 6 | 32740576 | 5 | 0.523152 |
| SNP6-32740576 | HLA-DQB1 | 6 | 32740576 | 6 | 2.744703 |
| SNP6-32742347 | HLA-DQB1 | 6 | 32742347 | 6 | 2.447025 |
| SNP6-32742347 | HLA-DQB1 | 6 | 32742347 | 5 | 0.479741 |
| rs9276436     | HLA-DQA2 | 6 | 32822061 | 7 | 1.404443 |
| rs9276558     | HLA-DQB2 | 6 | 32832039 | 5 | 0.986654 |
| rs7774954     | HLA-DQB2 | 6 | 32832167 | 7 | 3.600707 |
| rs762815      | HLA-DQB2 | 6 | 32837620 | 5 | 3.94924  |
| rs1573649     | HLA-DQB2 | 6 | 32839236 | 5 | 4.05415  |
| rs1573649     | HLA-DQB2 | 6 | 32839236 | 1 | 2.80231  |
| rs1573649     | HLA-DQB2 | 6 | 32839236 | 6 | 3.261894 |
| rs2070120     | HLA-DOB  | 6 | 32888892 | 4 | 2.998398 |
| rs2070121     | HLA-DOB  | 6 | 32889532 | 6 | 5.601849 |
| rs2070121     | HLA-DOB  | 6 | 32889532 | 4 | 6.362816 |
| rs45459295    | HLA-DOB  | 6 | 32891064 | 3 | 2.050198 |
| rs45459295    | HLA-DOB  | 6 | 32891064 | 5 | 0.230267 |
| rs45459295    | HLA-DOB  | 6 | 32891064 | 1 | 4.09454  |
| rs45459295    | HLA-DOB  | 6 | 32891064 | 7 | 1.464444 |
| SNP6-32892654 | HLA-DOB  | 6 | 32892654 | 7 | 0.337142 |
| SNP6-32892654 | HLA-DOB  | 6 | 32892654 | 2 | 0.918517 |
| rs2071470     | HLA-DOB  | 6 | 32892731 | 3 | 2.261576 |
| rs2071470     | HLA-DOB  | 6 | 32892731 | 2 | 1.509129 |
| rs2071469     | HLA-DOB  | 6 | 32892761 | 4 | 2.482947 |
| rs2071469     | HLA-DOB  | 6 | 32892761 | 3 | 1.302238 |
| rs2071469     | HLA-DOB  | 6 | 32892761 | 6 | 1.515714 |
| rs2071469     | HLA-DOB  | 6 | 32892761 | 2 | 3.027097 |
| rs16870907    | TAP2     | 6 | 32897785 | 7 | 1.239475 |
| rs241456      | TAP2     | 6 | 32903943 | 2 | 5.944902 |
| rs241453      | TAP2     | 6 | 32904204 | 2 | 2.423223 |

|               |         |   |          |   |          |
|---------------|---------|---|----------|---|----------|
| rs241449      | TAP2    | 6 | 32904631 | 2 | 4.316455 |
| rs2228396     | TAP2    | 6 | 32905787 | 1 | 5.301327 |
| rs2228396     | TAP2    | 6 | 32905787 | 4 | 1.253993 |
| rs4576294     | TAP2    | 6 | 32906526 | 8 | 4.834792 |
| rs2228397     | TAP2    | 6 | 32908202 | 6 | 0.654273 |
| rs2228397     | TAP2    | 6 | 32908202 | 4 | 0.120989 |
| rs2228397     | TAP2    | 6 | 32908202 | 2 | 1.823449 |
| rs2228397     | TAP2    | 6 | 32908202 | 5 | 1.085345 |
| rs2228397     | TAP2    | 6 | 32908202 | 3 | 0.12967  |
| rs2228397     | TAP2    | 6 | 32908202 | 8 | 0.230528 |
| rs1800454     | TAP2    | 6 | 32908390 | 4 | 0.651886 |
| rs1800454     | TAP2    | 6 | 32908390 | 1 | 4.672911 |
| rs1800454     | TAP2    | 6 | 32908390 | 7 | 0.591663 |
| rs1800454     | TAP2    | 6 | 32908390 | 6 | 6.216653 |
| 401753        | TAP2    | 6 | 32913568 | 1 | 0.53772  |
| 401753        | TAP2    | 6 | 32913568 | 7 | 7.100757 |
| 401753        | TAP2    | 6 | 32913568 | 8 | 0.647179 |
| 401753        | TAP2    | 6 | 32913568 | 4 | 1.587691 |
| 401753        | TAP2    | 6 | 32913568 | 5 | 0.039368 |
| 401753        | TAP2    | 6 | 32913568 | 2 | 4.536764 |
| rs2071552     | TAP2    | 6 | 32914439 | 6 | 1.034002 |
| rs2071552     | TAP2    | 6 | 32914439 | 1 | 0.115108 |
| rs2071552     | TAP2    | 6 | 32914439 | 5 | 0.689838 |
| rs2071552     | TAP2    | 6 | 32914439 | 4 | 4.506739 |
| rs2071543     | PSMB8   | 6 | 32919607 | 2 | 5.765705 |
| rs8842        | TAP1    | 6 | 32921139 | 7 | 0.618879 |
| rs8842        | TAP1    | 6 | 32921139 | 2 | 2.329335 |
| rs3198005     | TAP1    | 6 | 32921192 | 5 | 0.829888 |
| SNP6-32924421 | TAP1    | 6 | 32924421 | 6 | 2.891193 |
| GA023748      | TAP1    | 6 | 32924750 | 2 | 4.435429 |
| GA023748      | TAP1    | 6 | 32924750 | 7 | 0.331164 |
| rs2127679     | TAP1    | 6 | 32926214 | 6 | 1.175725 |
| rs17879632    | TAP1    | 6 | 32927946 | 6 | 0.683363 |
| rs10751       | HLA-DMB | 6 | 33010561 | 2 | 4.447627 |
| rs10751       | HLA-DMB | 6 | 33010561 | 4 | 1.006525 |
| rs10751       | HLA-DMB | 6 | 33010561 | 6 | 3.095715 |
| rs17617321    | HLA-DMB | 6 | 33014564 | 3 | 0.125605 |
| rs17617321    | HLA-DMB | 6 | 33014564 | 6 | 4.814066 |
| rs17617333    | HLA-DMB | 6 | 33014630 | 6 | 6.021499 |
| rs17617333    | HLA-DMB | 6 | 33014630 | 3 | 0.047421 |
| rs17583782    | HLA-DMB | 6 | 33014694 | 3 | 0.297407 |
| rs17583782    | HLA-DMB | 6 | 33014694 | 6 | 1.342147 |
| rs45514397    | HLA-DMB | 6 | 33014694 | 6 | 1.710221 |
| rs45514397    | HLA-DMB | 6 | 33014694 | 3 | 0.231349 |
| rs6926628     | HLA-DMA | 6 | 33025476 | 6 | 0.829388 |
| rs6926628     | HLA-DMA | 6 | 33025476 | 3 | 0.198687 |
| rs9276935     | BRD2    | 6 | 33044419 | 6 | 0.328629 |

|               |           |   |          |   |          |
|---------------|-----------|---|----------|---|----------|
| rs206781      | BRD2      | 6 | 33054111 | 8 | 6.208661 |
| rs206781      | BRD2      | 6 | 33054111 | 3 | 0.613282 |
| rs592625      | HLA-DOA   | 6 | 33080668 | 7 | 0.024082 |
| rs376892      | HLA-DOA   | 6 | 33080865 | 2 | 1.0403   |
| rs2581        | HLA-DOA   | 6 | 33082379 | 3 | 2.443763 |
| GA023780      | HLA-DPA1  | 6 | 33144413 | 3 | 0.206283 |
| rs12722009    | HLA-DPA1  | 6 | 33145397 | 3 | 0.870644 |
| SNP6-33156664 | HLA-DPB1  | 6 | 33156664 | 3 | 2.507087 |
| SNP6-33156664 | HLA-DPB1  | 6 | 33156664 | 7 | 0.267536 |
| rs9277533     | HLA-DPB1  | 6 | 33162699 | 7 | 2.31327  |
| rs9277533     | HLA-DPB1  | 6 | 33162699 | 3 | 1.77549  |
| rs2295119     | LOC646702 | 6 | 33168848 | 3 | 0.350915 |
| rs1799911     | COL11A2   | 6 | 33246655 | 5 | 0.192914 |
| rs1799910     | COL11A2   | 6 | 33247306 | 4 | 0.037259 |
| rs9277934     | COL11A2   | 6 | 33261506 | 3 | 0.528102 |
| rs9277934     | COL11A2   | 6 | 33261506 | 5 | 0.754079 |
| rs2072915     | RXRB      | 6 | 33270060 | 4 | 0.123999 |
| rs2072915     | RXRB      | 6 | 33270060 | 5 | 5.369377 |
| rs2072915     | RXRB      | 6 | 33270060 | 3 | 0.005224 |
| SNP6-33277160 | SLC39A7   | 6 | 33277160 | 5 | 0.132003 |
| rs1547387     | SLC39A7   | 6 | 33277873 | 5 | 4.565836 |
| rs17215210    | VPS52     | 6 | 33347457 | 1 | 6.028317 |
| rs3130257     | WDR46     | 6 | 33364449 | 1 | 4.835922 |
| rs1059288     | TAPBP     | 6 | 33375650 | 3 | 0.29965  |
| rs1059288     | TAPBP     | 6 | 33375650 | 4 | 0.754871 |
| rs3130100     | ZBTB22    | 6 | 33391744 | 4 | 0.587236 |
| rs3130100     | ZBTB22    | 6 | 33391744 | 3 | 1.529865 |
| rs3130267     | MYL8P     | 6 | 33414772 | 4 | 2.878161 |
| rs3130267     | MYL8P     | 6 | 33414772 | 3 | 2.756387 |
| rs3130267     | MYL8P     | 6 | 33414772 | 1 | 3.350644 |
| rs211449      | LYPLA2P1  | 6 | 33441894 | 4 | 0.270951 |
| rs211449      | LYPLA2P1  | 6 | 33441894 | 7 | 5.032202 |
| rs465223      | KIFC1     | 6 | 33467694 | 7 | 0.6476   |
| rs465223      | KIFC1     | 6 | 33467694 | 8 | 7.113643 |
| rs465223      | KIFC1     | 6 | 33467694 | 3 | 0.111623 |
| rs4231        | PHF1      | 6 | 33491952 | 3 | 0.257953 |
| rs4231        | PHF1      | 6 | 33491952 | 4 | 3.167112 |
| rs4231        | PHF1      | 6 | 33491952 | 1 | 2.878381 |
| rs407710      | FLJ43752  | 6 | 33662235 | 2 | 1.797776 |
| rs4559081     | FLJ43752  | 6 | 33663326 | 3 | 0.762481 |
| rs4559081     | FLJ43752  | 6 | 33663326 | 1 | 1.84403  |
| rs210162      | FLJ43752  | 6 | 33668874 | 2 | 3.376478 |
| rs2229637     | ITPR3     | 6 | 33751536 | 4 | 0.751979 |
| rs2229637     | ITPR3     | 6 | 33751536 | 1 | 0.562469 |
| rs11967839    | ITPR3     | 6 | 33756122 | 2 | 1.047677 |
| rs2966        | IHPK3     | 6 | 33797498 | 8 | 0.902253 |
| rs2967        | IHPK3     | 6 | 33797512 | 8 | 0.388041 |

|               |           |   |          |   |          |
|---------------|-----------|---|----------|---|----------|
| rs559290      | IHPK3     | 6 | 33797934 | 8 | 0.895246 |
| rs623813      | IHPK3     | 6 | 33811067 | 5 | 0.525687 |
| rs545787      | IHPK3     | 6 | 33811208 | 8 | 0.454972 |
| rs12189725    | IHPK3     | 6 | 33811372 | 5 | 0.702818 |
| rs12189725    | IHPK3     | 6 | 33811372 | 4 | 1.759669 |
| rs12189725    | IHPK3     | 6 | 33811372 | 7 | 1.35342  |
| rs12189725    | IHPK3     | 6 | 33811372 | 1 | 3.544347 |
| rs12662447    | IHPK3     | 6 | 33822651 | 1 | 2.707571 |
| rs12662447    | IHPK3     | 6 | 33822651 | 7 | 1.107153 |
| rs12662447    | IHPK3     | 6 | 33822651 | 4 | 2.923131 |
| rs12662447    | IHPK3     | 6 | 33822651 | 5 | 2.299129 |
| SNP6-34620173 | SPDEF     | 6 | 34620173 | 7 | 0.089148 |
| rs1201872     | C6orf106  | 6 | 34663687 | 1 | 0.692524 |
| rs1201872     | C6orf106  | 6 | 34663687 | 2 | 4.965604 |
| rs4259246     | UHRF1BP1  | 6 | 34911925 | 3 | 0.234428 |
| rs4259246     | UHRF1BP1  | 6 | 34911925 | 2 | 0.678515 |
| rs4259246     | UHRF1BP1  | 6 | 34911925 | 4 | 1.832395 |
| rs4259246     | UHRF1BP1  | 6 | 34911925 | 7 | 1.759068 |
| rs4259246     | UHRF1BP1  | 6 | 34911925 | 1 | 0.572022 |
| SNP6-34934899 | UHRF1BP1  | 6 | 34934899 | 1 | 5.966302 |
| rs9469913     | UHRF1BP1  | 6 | 34935063 | 3 | 0.840184 |
| rs11552398    | ANKS1A    | 6 | 35166509 | 6 | 3.420305 |
| SNP6-35196359 | TCP11     | 6 | 35196359 | 8 | 0.172478 |
| SNP6-35196359 | TCP11     | 6 | 35196359 | 6 | 1.746307 |
| rs28360552    | ZNF76     | 6 | 35361952 | 7 | 1.218253 |
| rs28360552    | ZNF76     | 6 | 35361952 | 2 | 0.722716 |
| rs28360552    | ZNF76     | 6 | 35361952 | 1 | 1.245125 |
| rs16874216    | ZNF76     | 6 | 35371219 | 1 | 0.191969 |
| rs16874216    | ZNF76     | 6 | 35371219 | 7 | 0.595635 |
| rs16874262    | DEF6      | 6 | 35373689 | 7 | 5.306338 |
| rs9658134     | PPARD     | 6 | 35486776 | 3 | 0.458462 |
| rs9658167     | PPARD     | 6 | 35502058 | 7 | 5.217221 |
| rs1051952     | TULP1     | 6 | 35573764 | 8 | 0.111654 |
| rs1051952     | TULP1     | 6 | 35573764 | 7 | 0.117079 |
| rs2064318     | TULP1     | 6 | 35585003 | 1 | 0.332963 |
| rs12211728    | LOC340204 | 6 | 35863636 | 2 | 2.9698   |
| rs12211728    | LOC340204 | 6 | 35863636 | 7 | 0.314768 |
| rs12211728    | LOC340204 | 6 | 35863636 | 5 | 0.685793 |
| rs12211728    | LOC340204 | 6 | 35863636 | 4 | 3.784655 |
| rs12211728    | LOC340204 | 6 | 35863636 | 3 | 0.188908 |
| rs2295852     | SLC26A8   | 6 | 36031224 | 8 | 1.277719 |
| rs2295852     | SLC26A8   | 6 | 36031224 | 5 | 1.188442 |
| rs2295852     | SLC26A8   | 6 | 36031224 | 4 | 0.916428 |
| rs17713154    | SLC26A8   | 6 | 36075750 | 7 | 0.09739  |
| rs17713154    | SLC26A8   | 6 | 36075750 | 2 | 2.761777 |
| rs743923      | SLC26A8   | 6 | 36088099 | 3 | 0.943068 |
| rs3748045     | BRPF3     | 6 | 36306555 | 6 | 0.60575  |

|            |           |   |          |   |          |
|------------|-----------|---|----------|---|----------|
| rs3748045  | BRPF3     | 6 | 36306555 | 1 | 0.713008 |
| rs3748045  | BRPF3     | 6 | 36306555 | 4 | 0.140553 |
| rs3748045  | BRPF3     | 6 | 36306555 | 8 | 1.134621 |
| rs12199580 | PNPLA1    | 6 | 36378108 | 8 | 0.692835 |
| rs4713956  | PNPLA1    | 6 | 36383436 | 8 | 2.038192 |
| rs4713956  | PNPLA1    | 6 | 36383436 | 6 | 0.250258 |
| rs41270098 | C6orf222  | 6 | 36402842 | 2 | 1.857248 |
| rs2234080  | ETV7      | 6 | 36444742 | 5 | 1.336095 |
| rs2234071  | ETV7      | 6 | 36463350 | 6 | 1.884803 |
| rs2234071  | ETV7      | 6 | 36463350 | 2 | 3.856483 |
| rs2234071  | ETV7      | 6 | 36463350 | 4 | 0.554428 |
| rs2234071  | ETV7      | 6 | 36463350 | 7 | 1.577199 |
| rs2234071  | ETV7      | 6 | 36463350 | 5 | 0.531114 |
| rs584196   | KCTD20    | 6 | 36564221 | 7 | 6.223117 |
| rs584196   | KCTD20    | 6 | 36564221 | 1 | 5.760775 |
| rs584196   | KCTD20    | 6 | 36564221 | 6 | 4.728112 |
| rs2071809  | STK38     | 6 | 36571605 | 6 | 0.533126 |
| rs12199346 | LOC389386 | 6 | 36749524 | 8 | 3.492188 |
| rs12199346 | LOC389386 | 6 | 36749524 | 6 | 3.411696 |
| rs12199346 | LOC389386 | 6 | 36749524 | 3 | 3.647832 |
| rs12199346 | LOC389386 | 6 | 36749524 | 5 | 3.781029 |
| rs12199346 | LOC389386 | 6 | 36749524 | 2 | 2.801819 |
| rs12199346 | LOC389386 | 6 | 36749524 | 4 | 4.173782 |
| rs4711459  | LOC389386 | 6 | 36750002 | 5 | 0.642175 |
| rs4711460  | LOC389386 | 6 | 36750106 | 5 | 2.412746 |
| rs10947623 | LOC389386 | 6 | 36750814 | 5 | 0.054719 |
| rs87152    | FLJ43093  | 6 | 36808384 | 1 | 1.544259 |
| rs236460   | FLJ43093  | 6 | 36808811 | 6 | 0.902024 |
| rs236460   | FLJ43093  | 6 | 36808811 | 1 | 0.422966 |
| rs236459   | FLJ43093  | 6 | 36808877 | 1 | 0.809544 |
| rs9368958  | CPNE5     | 6 | 36816534 | 3 | 0.617461 |
| rs9368958  | CPNE5     | 6 | 36816534 | 1 | 1.446956 |
| rs9368958  | CPNE5     | 6 | 36816534 | 6 | 1.813318 |
| rs1065261  | CPNE5     | 6 | 36816799 | 5 | 0.42256  |
| rs1065261  | CPNE5     | 6 | 36816799 | 3 | 0.355257 |
| rs1065260  | CPNE5     | 6 | 36816848 | 6 | 0.669213 |
| rs1065260  | CPNE5     | 6 | 36816848 | 3 | 0.161559 |
| rs1065260  | CPNE5     | 6 | 36816848 | 1 | 0.199212 |
| rs1065260  | CPNE5     | 6 | 36816848 | 5 | 0.022365 |
| rs1065259  | CPNE5     | 6 | 36816895 | 6 | 3.790925 |
| rs1065259  | CPNE5     | 6 | 36816895 | 3 | 1.240554 |
| rs1065259  | CPNE5     | 6 | 36816895 | 5 | 1.629227 |
| rs1065259  | CPNE5     | 6 | 36816895 | 1 | 2.275341 |
| rs1065258  | CPNE5     | 6 | 36817043 | 5 | 1.495581 |
| rs1065258  | CPNE5     | 6 | 36817043 | 3 | 0.026992 |
| rs763048   | CPNE5     | 6 | 36841110 | 3 | 0.621952 |
| rs763048   | CPNE5     | 6 | 36841110 | 5 | 0.120308 |

|            |           |   |          |   |          |
|------------|-----------|---|----------|---|----------|
| rs12194408 | PPIL1     | 6 | 36947576 | 3 | 0.06208  |
| rs1405070  | PI16      | 6 | 37030363 | 1 | 3.167959 |
| rs1405070  | PI16      | 6 | 37030363 | 3 | 1.578719 |
| rs1063021  | PI16      | 6 | 37040305 | 7 | 0.711902 |
| rs1063021  | PI16      | 6 | 37040305 | 3 | 0.4686   |
| rs1046279  | PI16      | 6 | 37040549 | 3 | 0.095795 |
| rs1046279  | PI16      | 6 | 37040549 | 7 | 1.310326 |
| rs831510   | FGD2      | 6 | 37084615 | 8 | 0.835551 |
| rs831510   | FGD2      | 6 | 37084615 | 5 | 0.936201 |
| rs831510   | FGD2      | 6 | 37084615 | 4 | 0.525882 |
| rs831510   | FGD2      | 6 | 37084615 | 3 | 0.502233 |
| rs12202642 | FGD2      | 6 | 37087561 | 3 | 1.199842 |
| rs708017   | FGD2      | 6 | 37104751 | 1 | 4.004414 |
| rs708017   | FGD2      | 6 | 37104751 | 7 | 2.008137 |
| rs9394402  | LOC646875 | 6 | 37153527 | 1 | 0.861473 |
| rs9394402  | LOC646875 | 6 | 37153527 | 6 | 0.974213 |
| rs9394402  | LOC646875 | 6 | 37153527 | 3 | 0.456947 |
| GA023892   | PIM1      | 6 | 37249940 | 5 | 0.000357 |
| GA023892   | PIM1      | 6 | 37249940 | 7 | 0.179739 |
| rs1055461  | C6orf128  | 6 | 37288021 | 6 | 5.814579 |
| rs1874736  | KIAA0082  | 6 | 37555972 | 3 | 0.837967 |
| rs1874736  | KIAA0082  | 6 | 37555972 | 6 | 3.377066 |
| rs1874736  | KIAA0082  | 6 | 37555972 | 8 | 3.714027 |
| rs12191311 | MDGA1     | 6 | 37711685 | 3 | 0.492066 |
| rs12191311 | MDGA1     | 6 | 37711685 | 1 | 0.365023 |
| rs3846874  | MDGA1     | 6 | 37731544 | 5 | 3.339749 |
| rs3846874  | MDGA1     | 6 | 37731544 | 3 | 2.155865 |
| rs2273110  | MDGA1     | 6 | 37734120 | 5 | 0.186694 |
| rs3823430  | DNAH8     | 6 | 38858866 | 2 | 4.00594  |
| rs9357283  | DNAH8     | 6 | 38908142 | 5 | 1.723238 |
| rs2061907  | DNAH8     | 6 | 38933307 | 5 | 1.024579 |
| rs6918287  | GLP1R     | 6 | 39141580 | 3 | 0.140987 |
| rs2235868  | GLP1R     | 6 | 39148632 | 2 | 5.389838 |
| rs2235868  | GLP1R     | 6 | 39148632 | 3 | 1.58867  |
| rs2235868  | GLP1R     | 6 | 39148632 | 5 | 1.866441 |
| rs2235868  | GLP1R     | 6 | 39148632 | 4 | 0.97678  |
| rs2235868  | GLP1R     | 6 | 39148632 | 7 | 0.021541 |
| rs1042044  | GLP1R     | 6 | 39149480 | 4 | 1.099821 |
| rs1042044  | GLP1R     | 6 | 39149480 | 5 | 1.047848 |
| rs1042044  | GLP1R     | 6 | 39149480 | 8 | 0.900726 |
| rs1042044  | GLP1R     | 6 | 39149480 | 3 | 1.637019 |
| rs1042044  | GLP1R     | 6 | 39149480 | 2 | 4.767836 |
| rs1042044  | GLP1R     | 6 | 39149480 | 6 | 2.354044 |
| rs1126476  | GLP1R     | 6 | 39156469 | 3 | 0.04829  |
| rs1126476  | GLP1R     | 6 | 39156469 | 1 | 0.277538 |
| rs1126476  | GLP1R     | 6 | 39156469 | 5 | 0.270037 |
| rs1126476  | GLP1R     | 6 | 39156469 | 7 | 0.073402 |

|            |        |   |          |   |          |
|------------|--------|---|----------|---|----------|
| rs10305516 | GLP1R  | 6 | 39162567 | 3 | 2.765239 |
| rs4714210  | GLP1R  | 6 | 39163463 | 8 | 2.224798 |
| rs4714210  | GLP1R  | 6 | 39163463 | 4 | 2.046632 |
| rs4714210  | GLP1R  | 6 | 39163463 | 1 | 2.621135 |
| rs4714210  | GLP1R  | 6 | 39163463 | 7 | 1.163313 |
| rs4714210  | GLP1R  | 6 | 39163463 | 2 | 1.724476 |
| rs4714210  | GLP1R  | 6 | 39163463 | 5 | 1.475093 |
| rs4714210  | GLP1R  | 6 | 39163463 | 6 | 1.197237 |
| rs4714210  | GLP1R  | 6 | 39163463 | 3 | 1.977155 |
| rs10305522 | GLP1R  | 6 | 39163494 | 6 | 0.813339 |
| rs10305522 | GLP1R  | 6 | 39163494 | 2 | 5.595661 |
| rs10305522 | GLP1R  | 6 | 39163494 | 5 | 1.492137 |
| rs10305522 | GLP1R  | 6 | 39163494 | 7 | 0.119709 |
| rs10947804 | KCNK17 | 6 | 39390014 | 1 | 1.513653 |
| rs10947804 | KCNK17 | 6 | 39390014 | 5 | 5.039303 |
| rs10947804 | KCNK17 | 6 | 39390014 | 7 | 1.108115 |
| rs10947804 | KCNK17 | 6 | 39390014 | 8 | 0.684189 |
| rs10947804 | KCNK17 | 6 | 39390014 | 4 | 2.153868 |
| rs11756091 | KCNK16 | 6 | 39390784 | 5 | 1.41342  |
| rs11756686 | KIF6   | 6 | 39411944 | 4 | 2.195376 |
| rs3008816  | DAAM2  | 6 | 39980218 | 2 | 4.610173 |
| rs9394693  | LRFN2  | 6 | 40508846 | 4 | 0.122539 |
| rs736795   | UNC5CL | 6 | 41106119 | 5 | 0.146225 |
| rs736795   | UNC5CL | 6 | 41106119 | 7 | 0.811415 |
| rs2234255  | TREM2  | 6 | 41235521 | 7 | 0.638633 |
| rs17328707 | TREML2 | 6 | 41267131 | 8 | 3.28978  |
| rs7754593  | TREML2 | 6 | 41267200 | 3 | 0.595216 |
| rs3800342  | TREML2 | 6 | 41267510 | 1 | 0.177071 |
| rs3800342  | TREML2 | 6 | 41267510 | 3 | 0.072647 |
| rs3747742  | TREML2 | 6 | 41270496 | 3 | 3.543855 |
| rs3747742  | TREML2 | 6 | 41270496 | 6 | 3.829218 |
| rs3747742  | TREML2 | 6 | 41270496 | 1 | 2.392028 |
| rs11962624 | TREML3 | 6 | 41284737 | 3 | 0.648969 |
| rs11962624 | TREML3 | 6 | 41284737 | 7 | 0.836832 |
| rs11962624 | TREML3 | 6 | 41284737 | 2 | 0.626947 |
| rs9349180  | TREML3 | 6 | 41293452 | 8 | 1.309469 |
| rs9349180  | TREML3 | 6 | 41293452 | 7 | 0.514377 |
| rs9369265  | TREML4 | 6 | 41304583 | 5 | 2.741912 |
| rs2101269  | TREML4 | 6 | 41304705 | 5 | 0.716761 |
| rs7769759  | TREML4 | 6 | 41305835 | 5 | 1.334879 |
| rs13204001 | TREML4 | 6 | 41313135 | 1 | 0.739183 |
| rs13204001 | TREML4 | 6 | 41313135 | 5 | 0.444161 |
| rs13204001 | TREML4 | 6 | 41313135 | 3 | 0.795503 |
| rs13204353 | TREML4 | 6 | 41313213 | 3 | 0.753687 |
| rs2234246  | TREM1  | 6 | 41351718 | 7 | 2.184006 |
| rs2234246  | TREM1  | 6 | 41351718 | 4 | 0.490449 |
| rs2234246  | TREM1  | 6 | 41351718 | 6 | 2.236375 |



|            |          |   |          |   |          |
|------------|----------|---|----------|---|----------|
| rs2236369  | NCR2     | 6 | 41417530 | 1 | 0.45463  |
| rs2273962  | NCR2     | 6 | 41426416 | 6 | 3.636476 |
| rs9471607  | FOXP4    | 6 | 41675106 | 8 | 2.885019 |
| rs9471607  | FOXP4    | 6 | 41675106 | 7 | 0.53765  |
| rs9471607  | FOXP4    | 6 | 41675106 | 3 | 0.088598 |
| rs913075   | FOXP4    | 6 | 41676884 | 8 | 0.121647 |
| rs913075   | FOXP4    | 6 | 41676884 | 7 | 0.492239 |
| rs913075   | FOXP4    | 6 | 41676884 | 1 | 4.600131 |
| rs913075   | FOXP4    | 6 | 41676884 | 5 | 0.075045 |
| rs913076   | FOXP4    | 6 | 41677096 | 8 | 1.13647  |
| rs913076   | FOXP4    | 6 | 41677096 | 7 | 3.681133 |
| rs913076   | FOXP4    | 6 | 41677096 | 3 | 0.738211 |
| rs2274578  | MED20    | 6 | 41996805 | 6 | 7.145236 |
| rs2274578  | MED20    | 6 | 41996805 | 2 | 3.53893  |
| rs2274578  | MED20    | 6 | 41996805 | 7 | 7.821796 |
| rs2274578  | MED20    | 6 | 41996805 | 5 | 0.208389 |
| rs10947995 | BYSL     | 6 | 41997201 | 7 | 1.294675 |
| rs9688934  | C6orf132 | 6 | 42218149 | 5 | 0.137362 |
| rs9688934  | C6orf132 | 6 | 42218149 | 4 | 0.203201 |
| rs9688934  | C6orf132 | 6 | 42218149 | 8 | 0.76004  |
| rs9688934  | C6orf132 | 6 | 42218149 | 1 | 6.284938 |
| rs2207730  | GUCA1A   | 6 | 42231295 | 5 | 1.583467 |
| rs9471793  | GUCA1A   | 6 | 42249247 | 6 | 0.763596 |
| rs9471793  | GUCA1A   | 6 | 42249247 | 5 | 1.41441  |
| rs3749920  | GUCA1B   | 6 | 42260311 | 5 | 0.894166 |
| rs3749920  | GUCA1B   | 6 | 42260311 | 1 | 5.023663 |
| rs1474867  | GUCA1B   | 6 | 42270553 | 5 | 0.619502 |
| rs1474867  | GUCA1B   | 6 | 42270553 | 1 | 4.337869 |
| rs1474867  | GUCA1B   | 6 | 42270553 | 7 | 0.464728 |
| rs1474867  | GUCA1B   | 6 | 42270553 | 3 | 2.185555 |
| rs4714580  | MRPS10   | 6 | 42282536 | 1 | 3.489797 |
| rs4714580  | MRPS10   | 6 | 42282536 | 7 | 0.669643 |
| rs4714580  | MRPS10   | 6 | 42282536 | 3 | 0.793623 |
| rs4714580  | MRPS10   | 6 | 42282536 | 5 | 4.174782 |
| rs2295275  | TRERF1   | 6 | 42332524 | 1 | 4.481363 |
| rs5014584  | UBR2     | 6 | 42708297 | 5 | 0.485307 |
| rs835      | PRPH2    | 6 | 42773866 | 4 | 4.492983 |
| rs835      | PRPH2    | 6 | 42773866 | 6 | 3.862385 |
| rs434102   | PRPH2    | 6 | 42774039 | 3 | 1.466949 |
| rs434102   | PRPH2    | 6 | 42774039 | 5 | 3.498751 |
| rs434102   | PRPH2    | 6 | 42774039 | 1 | 4.002727 |
| rs390659   | PRPH2    | 6 | 42774142 | 5 | 0.466147 |
| rs390659   | PRPH2    | 6 | 42774142 | 3 | 0.513427 |
| rs390659   | PRPH2    | 6 | 42774142 | 1 | 3.879928 |
| rs7764439  | PRPH2    | 6 | 42797733 | 7 | 2.060831 |
| rs7764439  | PRPH2    | 6 | 42797733 | 3 | 2.980962 |
| rs3800291  | FLJ38717 | 6 | 42859435 | 7 | 0.30661  |

|               |          |   |          |   |          |
|---------------|----------|---|----------|---|----------|
| rs3800291     | FLJ38717 | 6 | 42859435 | 2 | 0.436204 |
| rs3800291     | FLJ38717 | 6 | 42859435 | 1 | 0.022181 |
| rs9471932     | KIAA0240 | 6 | 42932885 | 4 | 0.16028  |
| rs7764865     | KIAA0240 | 6 | 42943465 | 7 | 4.215471 |
| rs736158      | PEX6     | 6 | 43039732 | 3 | 1.139191 |
| rs736158      | PEX6     | 6 | 43039732 | 7 | 0.964964 |
| rs2274515     | PEX6     | 6 | 43041504 | 3 | 0.521391 |
| rs2274515     | PEX6     | 6 | 43041504 | 7 | 0.568771 |
| rs11751058    | MEA1     | 6 | 43088196 | 1 | 5.574732 |
| rs11751058    | MEA1     | 6 | 43088196 | 8 | 5.035706 |
| rs2273917     | CUL7     | 6 | 43116276 | 3 | 0.250661 |
| rs2273917     | CUL7     | 6 | 43116276 | 7 | 0.497827 |
| rs4711738     | CUL7     | 6 | 43128166 | 3 | 0.183691 |
| rs4711738     | CUL7     | 6 | 43128166 | 7 | 0.12865  |
| rs4714661     | KLC4     | 6 | 43142985 | 3 | 1.033907 |
| SNP6-43261765 | PARC     | 6 | 43261765 | 6 | 0.295557 |
| rs7832        | C6orf108 | 6 | 43301855 | 3 | 0.528062 |
| rs10948072    | ZNF318   | 6 | 43415839 | 7 | 3.370997 |
| rs700008      | ABCC10   | 6 | 43507815 | 8 | 0.811649 |
| rs35192247    | DLK2     | 6 | 43526506 | 2 | 4.661319 |
| rs34764062    | DLK2     | 6 | 43530174 | 3 | 0.98321  |
| rs2231767     | YIPF3    | 6 | 43589099 | 2 | 4.633392 |
| rs2231767     | YIPF3    | 6 | 43589099 | 3 | 0.964226 |
| SNP6-43592510 | YIPF3    | 6 | 43592510 | 5 | 0.028289 |
| rs1106841     | XPO5     | 6 | 43604640 | 1 | 0.709751 |
| rs2010963     | VEGFA    | 6 | 43846328 | 3 | 0.223366 |
| rs2010963     | VEGFA    | 6 | 43846328 | 2 | 5.170048 |
| rs2010963     | VEGFA    | 6 | 43846328 | 7 | 0.604864 |
| rs2295333     | C6orf223 | 6 | 44076792 | 3 | 1.947103 |
| rs700006      | MRPL14   | 6 | 44189488 | 5 | 3.565117 |
| rs700006      | MRPL14   | 6 | 44189488 | 1 | 2.073324 |
| rs700006      | MRPL14   | 6 | 44189488 | 6 | 1.125903 |
| rs4714761     | TMEM63B  | 6 | 44225585 | 2 | 2.945067 |
| GA005842      | TMEM63B  | 6 | 44225642 | 2 | 5.693886 |
| SNP6-44255799 | CAPN11   | 6 | 44255799 | 6 | 0.565411 |
| SNP6-44255799 | CAPN11   | 6 | 44255799 | 5 | 0.753252 |
| SNP6-44255799 | CAPN11   | 6 | 44255799 | 7 | 0.813686 |
| SNP6-44255799 | CAPN11   | 6 | 44255799 | 3 | 0.364653 |
| SNP6-44255799 | CAPN11   | 6 | 44255799 | 8 | 0.936267 |
| rs7761137     | CAPN11   | 6 | 44259468 | 4 | 5.640891 |
| rs7761137     | CAPN11   | 6 | 44259468 | 6 | 0.514951 |
| rs7761137     | CAPN11   | 6 | 44259468 | 5 | 0.818046 |
| rs28385699    | NFKBIE   | 6 | 44334411 | 2 | 5.79193  |
| rs516582      | TCTE1    | 6 | 44358143 | 1 | 1.275276 |
| rs516582      | TCTE1    | 6 | 44358143 | 3 | 0.66779  |
| rs2297336     | TCTE1    | 6 | 44361743 | 3 | 0.72654  |
| rs2297336     | TCTE1    | 6 | 44361743 | 1 | 2.782166 |

|               |          |   |          |   |          |
|---------------|----------|---|----------|---|----------|
| rs324146      | TCTE1    | 6 | 44363437 | 3 | 0.064809 |
| rs2297334     | CDC5L    | 6 | 44463377 | 5 | 0.482053 |
| rs2297334     | CDC5L    | 6 | 44463377 | 4 | 4.400266 |
| rs2297333     | CDC5L    | 6 | 44463401 | 5 | 4.104371 |
| rs2297333     | CDC5L    | 6 | 44463401 | 4 | 0.384058 |
| rs2273666     | CDC5L    | 6 | 44521441 | 5 | 0.317111 |
| rs2273666     | CDC5L    | 6 | 44521441 | 4 | 6.088178 |
| rs9369514     | SUPT3H   | 6 | 44905249 | 4 | 5.295085 |
| rs9369514     | SUPT3H   | 6 | 44905249 | 6 | 6.736938 |
| rs9369514     | SUPT3H   | 6 | 44905249 | 1 | 0.518262 |
| rs9369514     | SUPT3H   | 6 | 44905249 | 8 | 5.941869 |
| rs9472463     | SUPT3H   | 6 | 45398612 | 6 | 0.672514 |
| rs11752816    | ENPP4    | 6 | 46215271 | 1 | 3.829263 |
| rs7451713     | ENPP4    | 6 | 46215711 | 2 | 8.069451 |
| rs7451713     | ENPP4    | 6 | 46215711 | 3 | 0.621693 |
| rs2295017     | ENPP5    | 6 | 46235795 | 8 | 0.213263 |
| rs2295017     | ENPP5    | 6 | 46235795 | 1 | 0.009638 |
| rs2295017     | ENPP5    | 6 | 46235795 | 2 | 5.458597 |
| rs2295017     | ENPP5    | 6 | 46235795 | 3 | 0.492023 |
| rs2295017     | ENPP5    | 6 | 46235795 | 5 | 0.229977 |
| rs3822892     | ENPP5    | 6 | 46246574 | 1 | 4.604887 |
| rs3799893     | RCAN2    | 6 | 46297046 | 1 | 4.001679 |
| rs3734655     | RCAN2    | 6 | 46298476 | 1 | 4.062606 |
| rs9381461     | CYP39A1  | 6 | 46625701 | 7 | 0.204789 |
| rs9381461     | CYP39A1  | 6 | 46625701 | 2 | 0.752965 |
| rs9381461     | CYP39A1  | 6 | 46625701 | 4 | 0.519665 |
| rs7761731     | CYP39A1  | 6 | 46671776 | 8 | 0.697599 |
| rs3757241     | SLC25A27 | 6 | 46731657 | 1 | 5.207357 |
| rs3757241     | SLC25A27 | 6 | 46731657 | 4 | 1.049676 |
| rs3799277     | TDRD6    | 6 | 46765016 | 4 | 0.704608 |
| rs3799277     | TDRD6    | 6 | 46765016 | 1 | 5.41319  |
| rs1805017     | PLA2G7   | 6 | 46792181 | 8 | 5.171111 |
| rs1805017     | PLA2G7   | 6 | 46792181 | 5 | 6.505808 |
| SNP6-46909178 | MEP1A    | 6 | 46909178 | 4 | 4.700106 |
| rs2277115     | GPR110   | 6 | 47117910 | 4 | 0.107574 |
| rs2277115     | GPR110   | 6 | 47117910 | 7 | 4.650404 |
| rs4715039     | GPR111   | 6 | 47739269 | 1 | 3.837234 |
| rs13212023    | GPR111   | 6 | 47754707 | 5 | 2.45056  |
| rs13212023    | GPR111   | 6 | 47754707 | 7 | 0.767395 |
| rs13212023    | GPR111   | 6 | 47754707 | 8 | 1.46527  |
| rs8180544     | GPR111   | 6 | 47757181 | 7 | 0.792175 |
| rs8180544     | GPR111   | 6 | 47757181 | 8 | 2.203408 |
| rs8180544     | GPR111   | 6 | 47757181 | 4 | 1.545491 |
| rs8180544     | GPR111   | 6 | 47757181 | 1 | 6.342608 |
| rs17541107    | GPR111   | 6 | 47757224 | 7 | 0.327953 |
| rs17541107    | GPR111   | 6 | 47757224 | 4 | 0.922041 |
| rs17541107    | GPR111   | 6 | 47757224 | 5 | 0.970035 |

|               |        |   |          |   |          |
|---------------|--------|---|----------|---|----------|
| rs17541107    | GPR111 | 6 | 47757224 | 1 | 5.853905 |
| rs9296573     | GPR111 | 6 | 47762701 | 1 | 1.906133 |
| rs9369738     | GPR115 | 6 | 47790563 | 7 | 0.213909 |
| rs9381619     | OPN5   | 6 | 47901250 | 3 | 1.116939 |
| SNP6-49523407 | MUT    | 6 | 49523407 | 7 | 6.660736 |
| SNP6-49523407 | MUT    | 6 | 49523407 | 6 | 0.483395 |
| rs699957      | CRISP2 | 6 | 49789216 | 1 | 3.643142 |
| rs699957      | CRISP2 | 6 | 49789216 | 3 | 2.009039 |
| rs1864312     | CRISP3 | 6 | 49809398 | 1 | 0.787166 |
| rs1864312     | CRISP3 | 6 | 49809398 | 4 | 1.669552 |
| rs495335      | CRISP3 | 6 | 49809482 | 1 | 0.913628 |
| rs495335      | CRISP3 | 6 | 49809482 | 4 | 2.393839 |
| rs780556      | CRISP1 | 6 | 49910656 | 1 | 0.474033 |
| rs12205497    | CRISP1 | 6 | 49922338 | 3 | 0.471845 |
| rs2857514     | TFAP2B | 6 | 50919242 | 3 | 0.329195 |
| rs2857514     | TFAP2B | 6 | 50919242 | 7 | 3.392227 |
| rs2857514     | TFAP2B | 6 | 50919242 | 1 | 4.83502  |
| rs2857514     | TFAP2B | 6 | 50919242 | 8 | 0.319354 |
| rs2784200     | PKHD1  | 6 | 51589630 | 5 | 0.863587 |
| rs2784200     | PKHD1  | 6 | 51589630 | 7 | 0.665556 |
| rs9381994     | PKHD1  | 6 | 51591920 | 7 | 0.442625 |
| rs4715227     | PKHD1  | 6 | 51599843 | 7 | 3.781919 |
| rs765525      | PKHD1  | 6 | 51721136 | 3 | 0.442673 |
| rs9349603     | PKHD1  | 6 | 51828797 | 7 | 0.040688 |
| rs12210295    | PKHD1  | 6 | 51840766 | 3 | 0.014775 |
| rs1266923     | PKHD1  | 6 | 51932639 | 1 | 1.048061 |
| rs6901799     | PKHD1  | 6 | 52055216 | 3 | 0.815933 |
| rs3748066     | PAQR8  | 6 | 52375967 | 1 | 2.838633 |
| rs17591381    | PAQR8  | 6 | 52376849 | 3 | 0.507111 |
| rs17591381    | PAQR8  | 6 | 52376849 | 8 | 3.035111 |
| rs3799274     | PAQR8  | 6 | 52377005 | 8 | 4.81483  |
| rs3799274     | PAQR8  | 6 | 52377005 | 1 | 4.364509 |
| rs3799274     | PAQR8  | 6 | 52377005 | 7 | 1.586087 |
| rs3799274     | PAQR8  | 6 | 52377005 | 4 | 1.140511 |
| rs655113      | PAQR8  | 6 | 52377110 | 5 | 1.268634 |
| rs655113      | PAQR8  | 6 | 52377110 | 4 | 2.294585 |
| rs655113      | PAQR8  | 6 | 52377110 | 3 | 1.677314 |
| rs655113      | PAQR8  | 6 | 52377110 | 7 | 1.620289 |
| rs3180068     | PAQR8  | 6 | 52377644 | 2 | 4.654132 |
| rs10484875    | PAQR8  | 6 | 52377895 | 3 | 0.586866 |
| rs10484875    | PAQR8  | 6 | 52377895 | 8 | 7.734488 |
| rs10807445    | PAQR8  | 6 | 52378951 | 3 | 0.685156 |
| rs1297        | PAQR8  | 6 | 52380272 | 4 | 0.872175 |
| rs1297        | PAQR8  | 6 | 52380272 | 1 | 4.752144 |
| rs1297        | PAQR8  | 6 | 52380272 | 7 | 2.4091   |
| rs3804506     | EFHC1  | 6 | 52411250 | 7 | 0.024782 |
| rs3804506     | EFHC1  | 6 | 52411250 | 4 | 0.056585 |

|            |           |   |          |   |          |
|------------|-----------|---|----------|---|----------|
| rs3804506  | EFHC1     | 6 | 52411250 | 1 | 2.852474 |
| rs17851770 | EFHC1     | 6 | 52465030 | 2 | 5.156635 |
| rs17851770 | EFHC1     | 6 | 52465030 | 5 | 0.546776 |
| rs9474230  | TRAM2     | 6 | 52474843 | 4 | 2.932587 |
| rs9474230  | TRAM2     | 6 | 52474843 | 6 | 0.399045 |
| rs2670125  | LOC730101 | 6 | 52637863 | 6 | 0.275407 |
| rs2670125  | LOC730101 | 6 | 52637863 | 1 | 0.143318 |
| rs2670125  | LOC730101 | 6 | 52637863 | 2 | 0.259723 |
| rs2670125  | LOC730101 | 6 | 52637863 | 4 | 0.638852 |
| rs2180314  | GSTA2     | 6 | 52725690 | 3 | 0.604224 |
| rs2180314  | GSTA2     | 6 | 52725690 | 6 | 1.60528  |
| rs6458868  | LOC647169 | 6 | 52738112 | 1 | 2.300321 |
| rs405729   | GSTA4     | 6 | 52950740 | 7 | 1.291741 |
| rs405729   | GSTA4     | 6 | 52950740 | 6 | 1.000511 |
| rs405729   | GSTA4     | 6 | 52950740 | 3 | 0.414364 |
| rs405729   | GSTA4     | 6 | 52950740 | 2 | 4.331174 |
| rs2397142  | LOC647190 | 6 | 53308258 | 6 | 1.791469 |
| rs2397142  | LOC647190 | 6 | 53308258 | 8 | 4.909222 |
| rs2397142  | LOC647190 | 6 | 53308258 | 7 | 0.026717 |
| rs2397142  | LOC647190 | 6 | 53308258 | 3 | 0.015505 |
| rs2397142  | LOC647190 | 6 | 53308258 | 2 | 3.681769 |
| rs2397142  | LOC647190 | 6 | 53308258 | 5 | 3.092944 |
| rs209510   | LOC647190 | 6 | 53309994 | 5 | 5.549961 |
| rs209510   | LOC647190 | 6 | 53309994 | 2 | 5.241598 |
| rs209510   | LOC647190 | 6 | 53309994 | 8 | 1.232584 |
| rs4562128  | LOC647190 | 6 | 53310565 | 6 | 3.737632 |
| rs4562128  | LOC647190 | 6 | 53310565 | 7 | 2.141345 |
| rs4562128  | LOC647190 | 6 | 53310565 | 3 | 0.692141 |
| rs4562128  | LOC647190 | 6 | 53310565 | 5 | 0.164177 |
| rs4562128  | LOC647190 | 6 | 53310565 | 2 | 4.787646 |
| rs3823111  | KLHL31    | 6 | 53624994 | 5 | 1.840928 |
| rs3823111  | KLHL31    | 6 | 53624994 | 4 | 0.02006  |
| rs10948758 | KLHL31    | 6 | 53627021 | 4 | 0.365918 |
| rs10948758 | KLHL31    | 6 | 53627021 | 7 | 0.37808  |
| rs10948758 | KLHL31    | 6 | 53627021 | 5 | 1.020931 |
| rs10948758 | KLHL31    | 6 | 53627021 | 3 | 0.008903 |
| rs3799260  | KLHL31    | 6 | 53627564 | 3 | 1.253087 |
| rs3799260  | KLHL31    | 6 | 53627564 | 7 | 0.641324 |
| rs12210809 | KLHL31    | 6 | 53627816 | 3 | 0.373687 |
| rs17625497 | C6orf142  | 6 | 53991802 | 1 | 0.825806 |
| rs4712056  | C6orf142  | 6 | 54097485 | 4 | 3.099342 |
| rs4712056  | C6orf142  | 6 | 54097485 | 8 | 3.501753 |
| rs4712056  | C6orf142  | 6 | 54097485 | 1 | 4.427091 |
| rs3756990  | BMP5      | 6 | 55728210 | 1 | 4.022151 |
| rs41271330 | BMP5      | 6 | 55746987 | 5 | 0.962147 |
| rs41271330 | BMP5      | 6 | 55746987 | 4 | 0.703901 |
| rs41271330 | BMP5      | 6 | 55746987 | 1 | 4.661813 |

|               |           |   |          |   |          |
|---------------|-----------|---|----------|---|----------|
| rs41271330    | BMP5      | 6 | 55746987 | 8 | 0.67149  |
| rs3734444     | BMP5      | 6 | 55847512 | 6 | 2.586885 |
| rs3734444     | BMP5      | 6 | 55847512 | 3 | 0.593618 |
| rs3734444     | BMP5      | 6 | 55847512 | 1 | 0.808067 |
| rs35471617    | COL21A1   | 6 | 56141053 | 5 | 0.26081  |
| rs35471617    | COL21A1   | 6 | 56141053 | 4 | 0.345551 |
| rs6911502     | LOC442221 | 6 | 56405527 | 1 | 5.489134 |
| rs6911502     | LOC442221 | 6 | 56405527 | 5 | 5.719144 |
| rs6911502     | LOC442221 | 6 | 56405527 | 2 | 5.123051 |
| SNP6-56525504 | DST       | 6 | 56525504 | 1 | 0.255536 |
| SNP6-56525504 | DST       | 6 | 56525504 | 2 | 3.23773  |
| rs16888055    | DST       | 6 | 56579954 | 2 | 6.843964 |
| rs13193465    | C6orf65   | 6 | 56928207 | 5 | 1.518704 |
| rs13193465    | C6orf65   | 6 | 56928207 | 1 | 1.446682 |
| SNP6-57025479 | KIAA1586  | 6 | 57025479 | 8 | 6.111075 |
| SNP6-57025479 | KIAA1586  | 6 | 57025479 | 4 | 4.202174 |
| SNP6-57025479 | KIAA1586  | 6 | 57025479 | 7 | 0.342481 |
| rs1411578     | RAB23     | 6 | 57162802 | 7 | 0.702935 |
| rs1411578     | RAB23     | 6 | 57162802 | 1 | 4.157578 |
| rs1879        | LOC727916 | 6 | 64339528 | 3 | 0.064903 |
| rs913543      | BAI3      | 6 | 70127894 | 7 | 2.531547 |
| rs913543      | BAI3      | 6 | 70127894 | 1 | 1.347821 |
| rs913543      | BAI3      | 6 | 70127894 | 6 | 2.962746 |
| rs913543      | BAI3      | 6 | 70127894 | 3 | 1.780106 |
| rs9354880     | LMBRD1    | 6 | 70464186 | 4 | 0.232407 |
| rs9354880     | LMBRD1    | 6 | 70464186 | 1 | 2.300965 |
| rs1736        | COL19A1   | 6 | 70973719 | 4 | 4.622727 |
| rs1201814     | COL19A1   | 6 | 70974694 | 1 | 0.10605  |
| rs1201814     | COL19A1   | 6 | 70974694 | 4 | 0.175918 |
| rs9455190     | LOC642590 | 6 | 71374681 | 8 | 3.088512 |
| rs9455190     | LOC642590 | 6 | 71374681 | 4 | 3.474129 |
| rs9455190     | LOC642590 | 6 | 71374681 | 2 | 3.852307 |
| rs9455190     | LOC642590 | 6 | 71374681 | 6 | 4.22343  |
| rs2691511     | LOC642590 | 6 | 71374792 | 2 | 0.786439 |
| rs2691511     | LOC642590 | 6 | 71374792 | 8 | 1.420719 |
| rs2691511     | LOC642590 | 6 | 71374792 | 6 | 1.172175 |
| rs2691511     | LOC642590 | 6 | 71374792 | 3 | 1.769994 |
| rs17707714    | SMAP1     | 6 | 71627601 | 1 | 4.262554 |
| rs2273888     | OGFRL1    | 6 | 72063233 | 6 | 0.555487 |
| rs12214894    | LOC642681 | 6 | 73397014 | 4 | 0.401404 |
| rs12214894    | LOC642681 | 6 | 73397014 | 7 | 1.019485 |
| SNP6-73961278 | KCNQ5     | 6 | 73961278 | 8 | 0.079366 |
| SNP6-73961278 | KCNQ5     | 6 | 73961278 | 4 | 0.740242 |
| rs6927398     | KHDC1     | 6 | 73991856 | 4 | 0.951197 |
| rs496530      | OOEP      | 6 | 74135745 | 4 | 3.361258 |
| rs496530      | OOEP      | 6 | 74135745 | 8 | 1.024137 |
| rs496530      | OOEP      | 6 | 74135745 | 3 | 1.310203 |

|            |           |   |          |   |          |
|------------|-----------|---|----------|---|----------|
| rs558198   | DDX43     | 6 | 74161278 | 3 | 0.206641 |
| rs311686   | DDX43     | 6 | 74182596 | 3 | 1.228851 |
| rs311686   | DDX43     | 6 | 74182596 | 4 | 2.748591 |
| rs311686   | DDX43     | 6 | 74182596 | 2 | 5.158507 |
| rs311686   | DDX43     | 6 | 74182596 | 8 | 0.939079 |
| rs311685   | DDX43     | 6 | 74182609 | 3 | 0.74673  |
| rs311685   | DDX43     | 6 | 74182609 | 2 | 6.721981 |
| rs311685   | DDX43     | 6 | 74182609 | 8 | 0.539473 |
| rs311685   | DDX43     | 6 | 74182609 | 4 | 2.187418 |
| rs311683   | DDX43     | 6 | 74183662 | 8 | 0.431857 |
| rs311683   | DDX43     | 6 | 74183662 | 3 | 0.928328 |
| rs311683   | DDX43     | 6 | 74183662 | 4 | 0.625142 |
| rs311683   | DDX43     | 6 | 74183662 | 2 | 1.121135 |
| rs3734518  | SLC17A5   | 6 | 74361136 | 5 | 0.09259  |
| rs3734518  | SLC17A5   | 6 | 74361136 | 6 | 0.45353  |
| rs3734518  | SLC17A5   | 6 | 74361136 | 3 | 0.075046 |
| rs3734518  | SLC17A5   | 6 | 74361136 | 8 | 2.196215 |
| rs3734518  | SLC17A5   | 6 | 74361136 | 2 | 2.61958  |
| rs3734518  | SLC17A5   | 6 | 74361136 | 1 | 0.85136  |
| rs2917862  | CD109     | 6 | 74578668 | 3 | 1.104269 |
| rs970547   | COL12A1   | 6 | 75854022 | 4 | 0.017435 |
| rs970547   | COL12A1   | 6 | 75854022 | 7 | 0.483951 |
| rs970547   | COL12A1   | 6 | 75854022 | 1 | 3.171682 |
| rs2951916  | LOC643227 | 6 | 76231577 | 5 | 1.477146 |
| rs3778005  | IMPG1     | 6 | 76690105 | 2 | 4.926124 |
| rs3778005  | IMPG1     | 6 | 76690105 | 3 | 1.092419 |
| rs3778005  | IMPG1     | 6 | 76690105 | 4 | 0.689289 |
| rs3734313  | IMPG1     | 6 | 76697501 | 4 | 0.800691 |
| rs3734313  | IMPG1     | 6 | 76697501 | 3 | 0.771636 |
| rs10943299 | IMPG1     | 6 | 76697523 | 6 | 2.212297 |
| rs10943299 | IMPG1     | 6 | 76697523 | 7 | 1.816443 |
| rs3734311  | IMPG1     | 6 | 76717271 | 4 | 1.837307 |
| rs6908105  | IRAK1BP1  | 6 | 79651816 | 3 | 0.605786 |
| rs6908105  | IRAK1BP1  | 6 | 79651816 | 5 | 0.672558 |
| rs16890805 | LCA5      | 6 | 80252140 | 1 | 5.61123  |
| rs2803195  | LCA5      | 6 | 80285392 | 5 | 0.836723 |
| rs2803195  | LCA5      | 6 | 80285392 | 7 | 1.28241  |
| rs343705   | ELOVL4    | 6 | 80681249 | 4 | 1.790361 |
| rs343705   | ELOVL4    | 6 | 80681249 | 3 | 2.627269 |
| rs7759915  | LOC643562 | 6 | 80828706 | 5 | 0.210345 |
| rs3967160  | LOC643562 | 6 | 80834327 | 2 | 4.189678 |
| rs3967160  | LOC643562 | 6 | 80834327 | 1 | 4.205543 |
| rs7758761  | BCKDHB    | 6 | 81112018 | 2 | 3.653369 |
| rs7740958  | BCKDHB    | 6 | 81112132 | 2 | 0.051163 |
| rs3812145  | LOC728360 | 6 | 82611735 | 8 | 0.721024 |
| rs3812145  | LOC728360 | 6 | 82611735 | 3 | 1.278524 |
| rs3812145  | LOC728360 | 6 | 82611735 | 4 | 0.406619 |

|           |           |   |          |   |          |
|-----------|-----------|---|----------|---|----------|
| rs3763244 | LOC728360 | 6 | 82612340 | 6 | 2.166276 |
| rs3763244 | LOC728360 | 6 | 82612340 | 5 | 1.012468 |
| rs3763244 | LOC728360 | 6 | 82612340 | 2 | 6.363866 |
| rs770911  | TPBG      | 6 | 83131084 | 1 | 2.171133 |
| rs770911  | TPBG      | 6 | 83131084 | 4 | 0.079087 |
| rs770911  | TPBG      | 6 | 83131084 | 3 | 0.74844  |
| rs4706975 | UBE2CBP   | 6 | 83659302 | 2 | 0.003715 |
| rs4706975 | UBE2CBP   | 6 | 83659302 | 1 | 0.100444 |
| rs7739323 | UBE2CBP   | 6 | 83723764 | 5 | 0.195251 |
| rs7739323 | UBE2CBP   | 6 | 83723764 | 8 | 6.120896 |
| rs9449776 | C6orf117  | 6 | 84855778 | 1 | 5.065496 |
| rs2875382 | C6orf117  | 6 | 84855904 | 1 | 0.113755 |
| rs9449777 | C6orf117  | 6 | 84855950 | 1 | 5.489818 |
| rs1045649 | C6orf117  | 6 | 84856885 | 1 | 4.357343 |
| rs3219    | C6orf117  | 6 | 84857097 | 1 | 5.595146 |
| rs3734451 | LOC442233 | 6 | 85197118 | 3 | 1.479197 |
| rs3857479 | KRT18P30  | 6 | 86054896 | 5 | 3.407974 |
| rs3812138 | NT5E      | 6 | 86255952 | 1 | 2.913925 |
| rs3812138 | NT5E      | 6 | 86255952 | 4 | 0.598429 |
| rs3812138 | NT5E      | 6 | 86255952 | 7 | 0.458438 |
| rs6631    | CGA       | 6 | 87851978 | 2 | 2.654277 |
| rs6631    | CGA       | 6 | 87851978 | 1 | 0.011393 |
| rs6631    | CGA       | 6 | 87851978 | 8 | 0.581491 |
| rs1055409 | CGA       | 6 | 87852029 | 1 | 4.359517 |
| rs1055409 | CGA       | 6 | 87852029 | 8 | 0.898349 |
| rs1055409 | CGA       | 6 | 87852029 | 4 | 0.230419 |
| rs3812132 | ZNF292    | 6 | 88027020 | 8 | 0.121134 |
| rs3812132 | ZNF292    | 6 | 88027020 | 7 | 0.179873 |
| rs3812132 | ZNF292    | 6 | 88027020 | 4 | 0.410262 |
| rs3812132 | ZNF292    | 6 | 88027020 | 2 | 4.16219  |
| rs3812132 | ZNF292    | 6 | 88027020 | 3 | 0.180953 |
| rs3812130 | GJB7      | 6 | 88050480 | 7 | 0.081862 |
| rs3812130 | GJB7      | 6 | 88050480 | 3 | 1.567757 |
| rs3812130 | GJB7      | 6 | 88050480 | 8 | 1.157033 |
| rs3812130 | GJB7      | 6 | 88050480 | 4 | 4.866857 |
| rs3812130 | GJB7      | 6 | 88050480 | 2 | 2.833556 |
| rs6934603 | GJB7      | 6 | 88050734 | 2 | 3.956148 |
| rs6934603 | GJB7      | 6 | 88050734 | 4 | 0.213742 |
| rs6934603 | GJB7      | 6 | 88050734 | 3 | 0.62828  |
| rs6934603 | GJB7      | 6 | 88050734 | 8 | 2.293462 |
| rs6934603 | GJB7      | 6 | 88050734 | 7 | 0.909029 |
| rs4707358 | GJB7      | 6 | 88051291 | 8 | 0.54998  |
| rs4707358 | GJB7      | 6 | 88051291 | 7 | 0.842725 |
| rs4707358 | GJB7      | 6 | 88051291 | 2 | 3.018102 |
| rs4707358 | GJB7      | 6 | 88051291 | 4 | 0.179346 |
| rs397516  | C6orf162  | 6 | 88107771 | 8 | 2.411658 |
| rs397516  | C6orf162  | 6 | 88107771 | 7 | 0.603865 |



|               |           |   |          |   |          |
|---------------|-----------|---|----------|---|----------|
| rs397516      | C6orf162  | 6 | 88107771 | 2 | 4.401288 |
| rs397516      | C6orf162  | 6 | 88107771 | 4 | 0.865036 |
| rs9353482     | C6orf163  | 6 | 88131841 | 3 | 0.893514 |
| rs16879281    | C6orf165  | 6 | 88183142 | 3 | 0.374704 |
| rs2307393     | ORC3L     | 6 | 88419662 | 4 | 0.501118 |
| rs806368      | CNR1      | 6 | 88906819 | 4 | 0.07964  |
| rs12720071    | CNR1      | 6 | 88907900 | 2 | 1.900351 |
| rs4707436     | CNR1      | 6 | 88908470 | 1 | 0.138341 |
| rs2610767     | RNGTT     | 6 | 89378958 | 8 | 0.524078 |
| rs1796743     | GABRR1    | 6 | 89945463 | 1 | 0.483777 |
| rs1796743     | GABRR1    | 6 | 89945463 | 3 | 0.120287 |
| rs282129      | GABRR2    | 6 | 90024217 | 5 | 0.159382 |
| rs282129      | GABRR2    | 6 | 90024217 | 7 | 1.054187 |
| rs282117      | GABRR2    | 6 | 90038132 | 4 | 1.946431 |
| rs282117      | GABRR2    | 6 | 90038132 | 1 | 5.417687 |
| rs282117      | GABRR2    | 6 | 90038132 | 6 | 0.276338 |
| rs282117      | GABRR2    | 6 | 90038132 | 3 | 0.791086 |
| rs282117      | GABRR2    | 6 | 90038132 | 7 | 2.361145 |
| rs10502       | UBE2J1    | 6 | 90096389 | 2 | 3.974014 |
| rs10502       | UBE2J1    | 6 | 90096389 | 1 | 0.121631 |
| SNP6-90397167 | ANKRD6    | 6 | 90397167 | 1 | 4.495124 |
| SNP6-90429295 | MDN1      | 6 | 90429295 | 1 | 3.383485 |
| rs9353689     | MDN1      | 6 | 90447164 | 3 | 0.019685 |
| rs9353689     | MDN1      | 6 | 90447164 | 1 | 3.968876 |
| rs34766278    | MDN1      | 6 | 90453853 | 1 | 4.376006 |
| rs4053618     | MDN1      | 6 | 90516175 | 1 | 3.68176  |
| rs4053618     | MDN1      | 6 | 90516175 | 5 | 2.245904 |
| rs1036853     | MDN1      | 6 | 90556223 | 1 | 4.001228 |
| rs292245      | LOC644269 | 6 | 90652767 | 5 | 0.094737 |
| rs17513276    | BACH2     | 6 | 90694146 | 7 | 1.038689 |
| rs17513276    | BACH2     | 6 | 90694146 | 6 | 2.997537 |
| rs17513276    | BACH2     | 6 | 90694146 | 3 | 1.344113 |
| rs1065272     | BACH2     | 6 | 90695274 | 6 | 0.734256 |
| rs1065272     | BACH2     | 6 | 90695274 | 5 | 0.057219 |
| rs1055403     | BACH2     | 6 | 90695684 | 5 | 1.184388 |
| rs17765013    | BACH2     | 6 | 90698572 | 3 | 1.261112 |
| rs17765013    | BACH2     | 6 | 90698572 | 6 | 4.420907 |
| rs17765013    | BACH2     | 6 | 90698572 | 2 | 2.865944 |
| rs9451298     | BACH2     | 6 | 90717040 | 1 | 1.40713  |
| rs9451298     | BACH2     | 6 | 90717040 | 4 | 0.12529  |
| rs1504215     | BACH2     | 6 | 91062948 | 1 | 2.912495 |
| rs2172710     | MAP3K7    | 6 | 91282458 | 5 | 5.766475 |
| rs2278106     | EPHA7     | 6 | 94176940 | 8 | 1.232449 |
| rs9387522     | MANEA     | 6 | 96161656 | 1 | 4.174829 |
| rs9387522     | MANEA     | 6 | 96161656 | 3 | 0.056042 |
| rs4078339     | FUT9      | 6 | 96759092 | 7 | 0.934842 |
| rs3934926     | FUT9      | 6 | 96759929 | 7 | 0.079242 |

|                |           |   |           |   |          |
|----------------|-----------|---|-----------|---|----------|
| rs4275065      | FUT9      | 6 | 96760199  | 7 | 1.336615 |
| rs2273622      | FHL5      | 6 | 97165288  | 7 | 2.918528 |
| rs392127       | GPR63     | 6 | 97354287  | 5 | 5.779983 |
| rs392127       | GPR63     | 6 | 97354287  | 1 | 7.501132 |
| rs392127       | GPR63     | 6 | 97354287  | 3 | 0.682244 |
| rs35143662     | KLHL32    | 6 | 97521670  | 5 | 0.433721 |
| rs221527       | C6orf168  | 6 | 99878261  | 6 | 0.266191 |
| rs221527       | C6orf168  | 6 | 99878261  | 8 | 0.726679 |
| rs221527       | C6orf168  | 6 | 99878261  | 7 | 1.833909 |
| rs9376137      | COQ3      | 6 | 99948777  | 5 | 0.865024 |
| rs9376137      | COQ3      | 6 | 99948777  | 1 | 4.511959 |
| rs6915401      | USP45     | 6 | 99987560  | 7 | 0.358451 |
| rs13208607     | USP45     | 6 | 99990236  | 7 | 0.914924 |
| rs1323717      | USP45     | 6 | 100069455 | 8 | 0.512451 |
| rs3734346      | PRDM13    | 6 | 100169487 | 8 | 1.71628  |
| rs3734346      | PRDM13    | 6 | 100169487 | 5 | 1.433669 |
| rs6941007      | LOC728012 | 6 | 100548632 | 6 | 2.370199 |
| rs6941007      | LOC728012 | 6 | 100548632 | 3 | 2.041941 |
| rs6941007      | LOC728012 | 6 | 100548632 | 1 | 2.437414 |
| rs6941007      | LOC728012 | 6 | 100548632 | 5 | 3.478802 |
| rs985937       | LOC442238 | 6 | 100647908 | 8 | 4.536067 |
| rs985937       | LOC442238 | 6 | 100647908 | 5 | 3.98364  |
| rs985937       | LOC442238 | 6 | 100647908 | 2 | 3.636825 |
| rs985937       | LOC442238 | 6 | 100647908 | 7 | 3.426714 |
| rs985937       | LOC442238 | 6 | 100647908 | 1 | 5.086316 |
| rs13219623     | LOC442239 | 6 | 100691055 | 3 | 1.332252 |
| rs592436       | LOC728098 | 6 | 101444875 | 1 | 4.334011 |
| rs592436       | LOC728098 | 6 | 101444875 | 6 | 3.664332 |
| rs592436       | LOC728098 | 6 | 101444875 | 4 | 3.120011 |
| rs592436       | LOC728098 | 6 | 101444875 | 3 | 4.5724   |
| rs1890227      | BVES      | 6 | 105651496 | 7 | 2.774318 |
| rs1190281      | POPDC3    | 6 | 105712558 | 8 | 1.750241 |
| rs1190281      | POPDC3    | 6 | 105712558 | 2 | 3.617429 |
| rs1190282      | POPDC3    | 6 | 105712685 | 8 | 5.616728 |
| rs1149311      | LOC728010 | 6 | 105857103 | 3 | 0.487652 |
| rs1149311      | LOC728010 | 6 | 105857103 | 7 | 0.132699 |
| rs9486069      | PREP      | 6 | 105928142 | 8 | 4.547241 |
| rs9486069      | PREP      | 6 | 105928142 | 7 | 0.912953 |
| rs811925       | PRDM1     | 6 | 106654065 | 2 | 1.43163  |
| rs811925       | PRDM1     | 6 | 106654065 | 7 | 2.145829 |
| rs811925       | PRDM1     | 6 | 106654065 | 3 | 0.16389  |
| rs1010273      | PRDM1     | 6 | 106661718 | 2 | 1.370748 |
| rs1340623      | AIM1      | 6 | 107066692 | 7 | 8.338721 |
| rs1340623      | AIM1      | 6 | 107066692 | 3 | 0.360436 |
| SNP6-107098054 | AIM1      | 6 | 107098054 | 7 | 0.251282 |
| rs3101493      | QRSL1     | 6 | 107222087 | 6 | 1.742    |
| rs3101493      | QRSL1     | 6 | 107222087 | 7 | 0.632657 |

|                |           |   |           |   |          |
|----------------|-----------|---|-----------|---|----------|
| rs3101493      | QRSL1     | 6 | 107222087 | 8 | 3.707438 |
| rs3101493      | QRSL1     | 6 | 107222087 | 5 | 4.876743 |
| rs3101493      | QRSL1     | 6 | 107222087 | 2 | 1.759077 |
| rs3734748      | SOBP      | 6 | 108086368 | 7 | 1.245439 |
| rs3734748      | SOBP      | 6 | 108086368 | 1 | 0.648795 |
| rs10554        | SOBP      | 6 | 108087099 | 7 | 0.258963 |
| rs10554        | SOBP      | 6 | 108087099 | 1 | 0.012695 |
| rs11751218     | SCML4     | 6 | 108148494 | 3 | 2.391231 |
| rs11751218     | SCML4     | 6 | 108148494 | 1 | 0.005161 |
| rs17282829     | LOC642741 | 6 | 108432317 | 6 | 2.588567 |
| rs17282829     | LOC642741 | 6 | 108432317 | 4 | 2.255567 |
| rs17282829     | LOC642741 | 6 | 108432317 | 5 | 1.9835   |
| rs17282829     | LOC642741 | 6 | 108432317 | 1 | 2.056775 |
| SNP6-108784670 | LACE1     | 6 | 108784670 | 4 | 0.678548 |
| rs9386758      | ARMC2     | 6 | 109304072 | 1 | 5.360281 |
| rs11153136     | ARMC2     | 6 | 109340418 | 1 | 3.864264 |
| rs3734649      | ARMC2     | 6 | 109401445 | 7 | 0.38924  |
| rs16822        | SESN1     | 6 | 109414403 | 7 | 0.874897 |
| rs949882       | FLJ37396  | 6 | 109692755 | 4 | 1.091512 |
| rs949882       | FLJ37396  | 6 | 109692755 | 1 | 0.935273 |
| rs949882       | FLJ37396  | 6 | 109692755 | 7 | 0.847511 |
| rs949882       | FLJ37396  | 6 | 109692755 | 8 | 0.130554 |
| rs949882       | FLJ37396  | 6 | 109692755 | 2 | 0.044918 |
| rs949882       | FLJ37396  | 6 | 109692755 | 3 | 1.083175 |
| rs9487048      | C6orf184  | 6 | 109722296 | 7 | 0.797797 |
| rs9487048      | C6orf184  | 6 | 109722296 | 3 | 0.857748 |
| rs9487048      | C6orf184  | 6 | 109722296 | 4 | 0.13951  |
| rs9400272      | C6orf184  | 6 | 109723455 | 7 | 0.820389 |
| rs9400272      | C6orf184  | 6 | 109723455 | 3 | 0.173024 |
| rs6568580      | FLJ42177  | 6 | 109955796 | 1 | 0.075695 |
| rs6568580      | FLJ42177  | 6 | 109955796 | 2 | 1.72739  |
| rs4354185      | GPR6      | 6 | 110408354 | 7 | 0.552646 |
| rs4354185      | GPR6      | 6 | 110408354 | 4 | 0.646834 |
| rs12210538     | SLC22A16  | 6 | 110866701 | 6 | 3.237631 |
| rs12210538     | SLC22A16  | 6 | 110866701 | 3 | 0.344    |
| rs12210538     | SLC22A16  | 6 | 110866701 | 4 | 1.306582 |
| rs12210538     | SLC22A16  | 6 | 110866701 | 5 | 1.366557 |
| rs723685       | SLC22A16  | 6 | 110870568 | 2 | 2.971709 |
| rs723685       | SLC22A16  | 6 | 110870568 | 8 | 1.447312 |
| rs714368       | SLC22A16  | 6 | 110884821 | 3 | 0.476581 |
| rs714368       | SLC22A16  | 6 | 110884821 | 5 | 1.708301 |
| rs1775125      | LOC441166 | 6 | 111286311 | 2 | 0.881726 |
| rs1775125      | LOC441166 | 6 | 111286311 | 3 | 3.705132 |
| rs1775125      | LOC441166 | 6 | 111286311 | 4 | 4.857459 |
| rs706956       | LOC442244 | 6 | 111351509 | 3 | 2.088468 |
| rs3204953      | REV3L     | 6 | 111735319 | 5 | 0.366358 |
| rs3218600      | REV3L     | 6 | 111802592 | 1 | 4.881983 |

|                |           |   |           |   |          |
|----------------|-----------|---|-----------|---|----------|
| rs3218591      | REV3L     | 6 | 111802822 | 5 | 0.399219 |
| SNP6-112527208 | LOC619208 | 6 | 112527208 | 6 | 6.38655  |
| rs2213842      | LOC619208 | 6 | 112530503 | 5 | 0.749835 |
| rs2213842      | LOC619208 | 6 | 112530503 | 4 | 0.998202 |
| rs1050353      | LAMA4     | 6 | 112542605 | 3 | 0.052426 |
| rs11757455     | LAMA4     | 6 | 112629545 | 2 | 5.863255 |
| rs352091       | FLJ34503  | 6 | 114348919 | 2 | 0.423063 |
| rs352091       | FLJ34503  | 6 | 114348919 | 1 | 0.530693 |
| rs17791808     | FLJ34503  | 6 | 114349112 | 1 | 2.259529 |
| rs17791808     | FLJ34503  | 6 | 114349112 | 5 | 2.374743 |
| rs2282237      | HS3ST5    | 6 | 114485663 | 3 | 0.718456 |
| rs2282237      | HS3ST5    | 6 | 114485663 | 1 | 1.20078  |
| rs2105171      | FRK       | 6 | 116369550 | 7 | 0.129703 |
| rs2105171      | FRK       | 6 | 116369550 | 3 | 0.276017 |
| rs2105171      | FRK       | 6 | 116369550 | 4 | 3.025273 |
| rs1931895      | TSPYL4    | 6 | 116679664 | 8 | 0.21126  |
| rs1931895      | TSPYL4    | 6 | 116679664 | 2 | 6.000155 |
| rs2232470      | TSPYL4    | 6 | 116681776 | 7 | 0.615779 |
| rs2232470      | TSPYL4    | 6 | 116681776 | 8 | 0.372521 |
| rs2232470      | TSPYL4    | 6 | 116681776 | 3 | 0.402466 |
| rs2232470      | TSPYL4    | 6 | 116681776 | 5 | 2.207518 |
| rs3749895      | TSPYL1    | 6 | 116707467 | 1 | 3.739313 |
| rs3749895      | TSPYL1    | 6 | 116707467 | 5 | 7.022563 |
| rs3749895      | TSPYL1    | 6 | 116707467 | 4 | 3.413765 |
| SNP6-116827207 | DSE       | 6 | 116827207 | 8 | 0.479682 |
| SNP6-116891490 | FAM26F    | 6 | 116891490 | 1 | 5.342959 |
| SNP6-116891543 | FAM26F    | 6 | 116891543 | 4 | 2.343848 |
| SNP6-116891543 | FAM26F    | 6 | 116891543 | 8 | 0.167597 |
| SNP6-116986431 | FAM26D    | 6 | 116986431 | 6 | 1.324518 |
| rs6927567      | RSHL3     | 6 | 117057427 | 1 | 0.591864 |
| rs6927567      | RSHL3     | 6 | 117057427 | 2 | 0.715912 |
| rs6927567      | RSHL3     | 6 | 117057427 | 8 | 0.246283 |
| rs784133       | RSHL3     | 6 | 117057526 | 3 | 0.044363 |
| rs784133       | RSHL3     | 6 | 117057526 | 6 | 0.062899 |
| rs9488991      | RSHL3     | 6 | 117058371 | 8 | 0.939166 |
| rs6925922      | RSHL3     | 6 | 117060762 | 1 | 0.427899 |
| rs6925922      | RSHL3     | 6 | 117060762 | 8 | 0.018    |
| rs4946188      | C6orf113  | 6 | 117079875 | 6 | 3.087348 |
| rs4946188      | C6orf113  | 6 | 117079875 | 1 | 1.007706 |
| rs6901250      | GPRC6A    | 6 | 117220718 | 3 | 0.367997 |
| rs6924002      | GPRC6A    | 6 | 117220916 | 1 | 2.990825 |
| rs6901971      | GPRC6A    | 6 | 117221096 | 3 | 0.577802 |
| rs619203       | ROS1      | 6 | 117728877 | 4 | 0.209888 |
| rs619203       | ROS1      | 6 | 117728877 | 8 | 6.248998 |
| rs1998206      | ROS1      | 6 | 117832141 | 3 | 0.114637 |
| rs1045855      | GOPC      | 6 | 117988902 | 4 | 7.271172 |
| rs3752847      | GOPC      | 6 | 118030372 | 7 | 3.343633 |

|                |           |   |           |   |          |
|----------------|-----------|---|-----------|---|----------|
| rs3734345      | SLC35F1   | 6 | 118743735 | 1 | 0.366374 |
| SNP6-118993654 | C6orf204  | 6 | 118993654 | 3 | 0.389203 |
| SNP6-118993654 | C6orf204  | 6 | 118993654 | 5 | 0.317003 |
| SNP6-118993654 | C6orf204  | 6 | 118993654 | 8 | 5.417688 |
| SNP6-118993996 | C6orf204  | 6 | 118993996 | 5 | 4.446191 |
| SNP6-118993996 | C6orf204  | 6 | 118993996 | 7 | 1.638002 |
| rs1885125      | MCM9      | 6 | 119297778 | 2 | 2.778321 |
| rs1885125      | MCM9      | 6 | 119297778 | 4 | 2.830504 |
| rs1046226      | MAN1A1    | 6 | 119541265 | 1 | 6.440079 |
| rs1046226      | MAN1A1    | 6 | 119541265 | 7 | 0.304038 |
| rs1046226      | MAN1A1    | 6 | 119541265 | 3 | 1.101686 |
| rs1330107      | LOC728727 | 6 | 120207436 | 2 | 3.539308 |
| rs1330107      | LOC728727 | 6 | 120207436 | 7 | 1.611621 |
| rs1330107      | LOC728727 | 6 | 120207436 | 3 | 0.26686  |
| rs7745023      | C6orf170  | 6 | 121619069 | 6 | 2.154916 |
| rs7745023      | C6orf170  | 6 | 121619069 | 4 | 9.038004 |
| rs7745023      | C6orf170  | 6 | 121619069 | 1 | 4.888471 |
| rs7745023      | C6orf170  | 6 | 121619069 | 5 | 0.443813 |
| rs7767455      | C6orf170  | 6 | 121684550 | 2 | 5.77323  |
| rs7767455      | C6orf170  | 6 | 121684550 | 7 | 1.881099 |
| rs7767455      | C6orf170  | 6 | 121684550 | 1 | 0.880505 |
| rs6926219      | HSF2      | 6 | 122762505 | 1 | 1.247767 |
| rs13371        | SERINC1   | 6 | 122806725 | 1 | 4.197452 |
| rs13371        | SERINC1   | 6 | 122806725 | 6 | 8.203828 |
| rs1132643      | PKIB      | 6 | 123088715 | 3 | 0.631495 |
| rs1132643      | PKIB      | 6 | 123088715 | 4 | 5.197348 |
| rs1132643      | PKIB      | 6 | 123088715 | 2 | 1.765574 |
| rs1132643      | PKIB      | 6 | 123088715 | 5 | 0.0105   |
| rs1132643      | PKIB      | 6 | 123088715 | 6 | 2.004395 |
| rs28385609     | SMPDL3A   | 6 | 123164163 | 1 | 3.458821 |
| rs2295005      | HINT3     | 6 | 126319923 | 5 | 3.303276 |
| rs2295005      | HINT3     | 6 | 126319923 | 7 | 1.956974 |
| rs2295005      | HINT3     | 6 | 126319923 | 3 | 0.006249 |
| rs2295005      | HINT3     | 6 | 126319923 | 2 | 5.286018 |
| rs2295005      | HINT3     | 6 | 126319923 | 8 | 7.700305 |
| rs9388464      | HINT3     | 6 | 126340957 | 3 | 0.272115 |
| rs9388464      | HINT3     | 6 | 126340957 | 5 | 0.101475 |
| rs1892172      | RSPO3     | 6 | 127518209 | 3 | 1.092101 |
| rs3734446      | KIAA0408  | 6 | 127804059 | 1 | 0.900627 |
| rs2326593      | KIAA0408  | 6 | 127805778 | 1 | 1.988116 |
| rs2326593      | KIAA0408  | 6 | 127805778 | 3 | 0.634255 |
| rs2875982      | KIAA0408  | 6 | 127805834 | 3 | 1.183553 |
| rs2875982      | KIAA0408  | 6 | 127805834 | 5 | 1.834557 |
| rs17205908     | KIAA0408  | 6 | 127805998 | 1 | 0.860779 |
| rs6902288      | KIAA0408  | 6 | 127810455 | 1 | 2.307176 |
| rs6902288      | KIAA0408  | 6 | 127810455 | 3 | 0.463311 |
| rs3734447      | C6orf174  | 6 | 127813145 | 3 | 0.473025 |

|                |           |   |           |   |          |
|----------------|-----------|---|-----------|---|----------|
| rs3734447      | C6orf174  | 6 | 127813145 | 1 | 2.381582 |
| rs1140366      | LAMA2     | 6 | 129412799 | 7 | 0.595521 |
| rs3749877      | LAMA2     | 6 | 129764082 | 7 | 0.768482 |
| rs3749877      | LAMA2     | 6 | 129764082 | 8 | 0.260177 |
| rs3749878      | LAMA2     | 6 | 129764118 | 7 | 1.141351 |
| rs3749878      | LAMA2     | 6 | 129764118 | 5 | 0.86612  |
| rs2297738      | LAMA2     | 6 | 129803805 | 1 | 5.29519  |
| rs2229850      | LAMA2     | 6 | 129849407 | 7 | 1.834474 |
| rs2229850      | LAMA2     | 6 | 129849407 | 3 | 0.517081 |
| rs2229850      | LAMA2     | 6 | 129849407 | 2 | 0.780233 |
| rs1049476      | LAMA2     | 6 | 129879303 | 3 | 0.313852 |
| rs12197456     | ARHGAP18  | 6 | 129946942 | 7 | 0.587377 |
| rs12197456     | ARHGAP18  | 6 | 129946942 | 5 | 0.028969 |
| rs9375666      | C6orf191  | 6 | 130194145 | 5 | 0.710378 |
| rs7758540      | C6orf191  | 6 | 130194172 | 6 | 1.700152 |
| rs7758540      | C6orf191  | 6 | 130194172 | 5 | 0.624847 |
| rs7776426      | C6orf191  | 6 | 130194213 | 5 | 1.342088 |
| rs9492393      | C6orf191  | 6 | 130196360 | 1 | 2.146176 |
| rs1055374      | SAMD3     | 6 | 130507242 | 4 | 0.224762 |
| rs1055374      | SAMD3     | 6 | 130507242 | 5 | 0.688606 |
| rs3813360      | TMEM200A  | 6 | 130803491 | 8 | 4.301595 |
| rs3813359      | TMEM200A  | 6 | 130803650 | 8 | 3.174929 |
| rs3813359      | TMEM200A  | 6 | 130803650 | 1 | 2.907218 |
| rs4895896      | LOC285733 | 6 | 131190024 | 5 | 0.354778 |
| rs9402288      | LOC285733 | 6 | 131190075 | 6 | 0.442837 |
| rs9402288      | LOC285733 | 6 | 131190075 | 1 | 3.333019 |
| rs9402289      | LOC285733 | 6 | 131190179 | 1 | 2.87915  |
| rs4895897      | LOC285733 | 6 | 131190234 | 8 | 0.945039 |
| rs4895897      | LOC285733 | 6 | 131190234 | 5 | 0.491192 |
| rs942          | LOC285733 | 6 | 131197919 | 1 | 5.172687 |
| rs942          | LOC285733 | 6 | 131197919 | 5 | 0.598486 |
| rs714709       | LOC285733 | 6 | 131199232 | 2 | 2.473947 |
| SNP6-131220995 | EPB41L2   | 6 | 131220995 | 3 | 0.054669 |
| rs17059736     | EPB41L2   | 6 | 131232531 | 1 | 5.573645 |
| rs2781667      | MED23     | 6 | 131936837 | 4 | 0.644141 |
| rs2781667      | MED23     | 6 | 131936837 | 5 | 4.669932 |
| rs17601580     | ENPP3     | 6 | 132103113 | 2 | 3.949115 |
| rs1044548      | ENPP1     | 6 | 132253456 | 6 | 0.32695  |
| rs1044558      | ENPP1     | 6 | 132253507 | 6 | 4.434198 |
| rs1044558      | ENPP1     | 6 | 132253507 | 8 | 2.835834 |
| rs553          | ENPP1     | 6 | 132253733 | 8 | 0.480615 |
| rs553          | ENPP1     | 6 | 132253733 | 6 | 0.341789 |
| rs8192620      | TAAR1     | 6 | 133007972 | 1 | 3.598375 |
| rs8192620      | TAAR1     | 6 | 133007972 | 7 | 4.073807 |
| SNP6-133087595 | VNN3      | 6 | 133087595 | 5 | 1.091623 |
| SNP6-133087595 | VNN3      | 6 | 133087595 | 7 | 0.050523 |
| rs1883613      | VNN2      | 6 | 133118756 | 5 | 0.043114 |

|            |           |   |           |   |          |
|------------|-----------|---|-----------|---|----------|
| rs1883613  | VNN2      | 6 | 133118756 | 6 | 0.140278 |
| rs11154699 | RPS12     | 6 | 133177579 | 5 | 0.20585  |
| rs11154699 | RPS12     | 6 | 133177579 | 4 | 0.648846 |
| rs11154699 | RPS12     | 6 | 133177579 | 7 | 3.260375 |
| rs11154699 | RPS12     | 6 | 133177579 | 8 | 2.846545 |
| rs9389034  | SNORD100  | 6 | 133179703 | 7 | 0.58677  |
| rs9389034  | SNORD100  | 6 | 133179703 | 5 | 0.088965 |
| rs9493627  | EYA4      | 6 | 133831421 | 7 | 0.083724 |
| rs9493627  | EYA4      | 6 | 133831421 | 3 | 0.321858 |
| rs3734279  | EYA4      | 6 | 133891659 | 2 | 2.554869 |
| rs3734279  | EYA4      | 6 | 133891659 | 5 | 2.396868 |
| rs3734279  | EYA4      | 6 | 133891659 | 4 | 2.137047 |
| rs3734279  | EYA4      | 6 | 133891659 | 1 | 0.346192 |
| rs12190287 | TCF21     | 6 | 134256218 | 5 | 0.279151 |
| rs35776966 | SLC2A12   | 6 | 134350418 | 8 | 0.728693 |
| rs35776966 | SLC2A12   | 6 | 134350418 | 5 | 1.269594 |
| rs1385066  | SLC2A12   | 6 | 134352567 | 5 | 0.756842 |
| rs17063228 | SLC2A12   | 6 | 134353032 | 5 | 0.183552 |
| rs7739722  | HBS1L     | 6 | 135323918 | 1 | 3.381698 |
| rs13196486 | HBS1L     | 6 | 135325567 | 1 | 4.610268 |
| rs13196486 | HBS1L     | 6 | 135325567 | 4 | 2.192092 |
| rs9399129  | HBS1L     | 6 | 135326841 | 4 | 0.921432 |
| rs4594969  | HBS1L     | 6 | 135327279 | 1 | 4.506667 |
| rs4594969  | HBS1L     | 6 | 135327279 | 4 | 0.436912 |
| rs1052502  | AHI1      | 6 | 135648258 | 2 | 4.486923 |
| rs35433555 | AHI1      | 6 | 135809975 | 5 | 0.08219  |
| rs1883818  | GAPDHL19  | 6 | 135982174 | 6 | 0.93325  |
| rs1883818  | GAPDHL19  | 6 | 135982174 | 8 | 4.355521 |
| rs1681     | MAP7      | 6 | 136705641 | 6 | 0.037135 |
| rs2076260  | MAP3K5    | 6 | 137019261 | 5 | 0.299988 |
| rs2076260  | MAP3K5    | 6 | 137019261 | 4 | 0.628053 |
| rs2076260  | MAP3K5    | 6 | 137019261 | 3 | 0.629101 |
| rs9321567  | MAP3K5    | 6 | 137067959 | 1 | 2.487382 |
| rs9321567  | MAP3K5    | 6 | 137067959 | 3 | 0.526417 |
| rs202566   | IL22RA2   | 6 | 137506767 | 1 | 0.658152 |
| rs28366    | IL22RA2   | 6 | 137507780 | 6 | 3.33092  |
| rs28366    | IL22RA2   | 6 | 137507780 | 1 | 0.232146 |
| rs28366    | IL22RA2   | 6 | 137507780 | 2 | 1.477772 |
| rs276466   | IL22RA2   | 6 | 137508307 | 3 | 0.898023 |
| rs276466   | IL22RA2   | 6 | 137508307 | 4 | 3.302536 |
| rs6901613  | LOC442263 | 6 | 138069355 | 7 | 0.540727 |
| rs6901613  | LOC442263 | 6 | 138069355 | 2 | 1.203893 |
| rs6901613  | LOC442263 | 6 | 138069355 | 1 | 1.812097 |
| rs6901613  | LOC442263 | 6 | 138069355 | 5 | 2.392268 |
| rs648802   | PERP      | 6 | 138455026 | 2 | 5.01894  |
| rs648802   | PERP      | 6 | 138455026 | 8 | 0.841004 |
| rs648802   | PERP      | 6 | 138455026 | 4 | 0.57427  |

|                |           |   |           |   |          |
|----------------|-----------|---|-----------|---|----------|
| rs9402958      | PBOV1     | 6 | 138579125 | 6 | 0.531959 |
| rs9402959      | PBOV1     | 6 | 138579170 | 6 | 2.077618 |
| rs3813338      | PBOV1     | 6 | 138579552 | 6 | 3.016813 |
| rs11758517     | PBOV1     | 6 | 138581249 | 6 | 0.6799   |
| rs203145       | KIAA1244  | 6 | 138656841 | 4 | 0.382728 |
| rs203145       | KIAA1244  | 6 | 138656841 | 7 | 0.080118 |
| rs4598095      | NHSL1     | 6 | 139065005 | 3 | 0.000793 |
| rs1044418      | REPS1     | 6 | 139271565 | 8 | 7.117168 |
| rs3173082      | HECA      | 6 | 139529529 | 6 | 3.674166 |
| rs3173082      | HECA      | 6 | 139529529 | 5 | 0.30576  |
| rs3173082      | HECA      | 6 | 139529529 | 8 | 1.530191 |
| rs3777668      | HECA      | 6 | 139540868 | 8 | 0.76448  |
| rs3777668      | HECA      | 6 | 139540868 | 7 | 0.260684 |
| rs3777668      | HECA      | 6 | 139540868 | 5 | 0.319057 |
| rs3777668      | HECA      | 6 | 139540868 | 6 | 3.975225 |
| rs17068451     | TXLNB     | 6 | 139618429 | 6 | 0.342763 |
| rs1131400      | CITED2    | 6 | 139736754 | 8 | 3.966541 |
| rs1131400      | CITED2    | 6 | 139736754 | 4 | 8.565777 |
| rs1131400      | CITED2    | 6 | 139736754 | 7 | 0.553681 |
| rs1131400      | CITED2    | 6 | 139736754 | 3 | 0.408497 |
| rs2143390      | GPR126    | 6 | 142744830 | 6 | 0.456602 |
| rs2143390      | GPR126    | 6 | 142744830 | 4 | 0.465654 |
| rs2294773      | GPR126    | 6 | 142807098 | 7 | 1.068795 |
| rs2294773      | GPR126    | 6 | 142807098 | 4 | 0.014239 |
| rs2294774      | GPR126    | 6 | 142807158 | 4 | 5.866317 |
| rs6940880      | LOC729320 | 6 | 143302293 | 8 | 2.664971 |
| rs1138410      | ADAT2     | 6 | 143788776 | 1 | 3.268526 |
| rs1138410      | ADAT2     | 6 | 143788776 | 5 | 0.241099 |
| rs1138410      | ADAT2     | 6 | 143788776 | 8 | 1.021354 |
| rs1061220      | ADAT2     | 6 | 143788963 | 5 | 0.426487 |
| rs1061220      | ADAT2     | 6 | 143788963 | 4 | 2.407993 |
| rs6918444      | C6orf94   | 6 | 144227107 | 3 | 0.338744 |
| rs6918444      | C6orf94   | 6 | 144227107 | 5 | 0.743663 |
| rs6918444      | C6orf94   | 6 | 144227107 | 1 | 0.700381 |
| rs1049846      | PLAGL1    | 6 | 144303173 | 3 | 4.38029  |
| rs1049846      | PLAGL1    | 6 | 144303173 | 4 | 0.864555 |
| rs1049846      | PLAGL1    | 6 | 144303173 | 5 | 4.16614  |
| SNP6-144853012 | UTRN      | 6 | 144853012 | 3 | 0.439324 |
| rs12204734     | UTRN      | 6 | 144893894 | 3 | 0.161968 |
| rs4305737      | UTRN      | 6 | 145093287 | 1 | 0.549159 |
| rs399516       | LOC645749 | 6 | 145852542 | 3 | 0.638695 |
| rs2235481      | EPM2A     | 6 | 146098541 | 8 | 0.367199 |
| rs2235481      | EPM2A     | 6 | 146098541 | 7 | 0.361841 |
| rs2235481      | EPM2A     | 6 | 146098541 | 3 | 0.341989 |
| rs2235481      | EPM2A     | 6 | 146098541 | 4 | 0.503183 |
| rs3811102      | FBXO30    | 6 | 146167486 | 3 | 0.739022 |
| rs3811102      | FBXO30    | 6 | 146167486 | 5 | 0.361487 |



|            |           |   |           |   |          |
|------------|-----------|---|-----------|---|----------|
| rs3811102  | FBXO30    | 6 | 146167486 | 7 | 6.835349 |
| rs3811102  | FBXO30    | 6 | 146167486 | 4 | 0.632616 |
| rs3811102  | FBXO30    | 6 | 146167486 | 8 | 0.074621 |
| rs3811102  | FBXO30    | 6 | 146167486 | 6 | 0.138722 |
| rs2942     | GRM1      | 6 | 146796833 | 1 | 0.131062 |
| rs2942     | GRM1      | 6 | 146796833 | 5 | 1.72035  |
| rs6923492  | GRM1      | 6 | 146797017 | 4 | 3.266114 |
| rs702346   | SAMD5     | 6 | 147928911 | 4 | 1.602553 |
| rs702347   | SAMD5     | 6 | 147929262 | 4 | 1.081155 |
| rs702347   | SAMD5     | 6 | 147929262 | 3 | 2.462725 |
| rs702347   | SAMD5     | 6 | 147929262 | 8 | 0.570514 |
| rs702347   | SAMD5     | 6 | 147929262 | 7 | 0.682211 |
| rs702349   | SAMD5     | 6 | 147929715 | 1 | 2.704849 |
| rs702349   | SAMD5     | 6 | 147929715 | 5 | 2.440817 |
| rs702349   | SAMD5     | 6 | 147929715 | 4 | 0.594317 |
| rs702349   | SAMD5     | 6 | 147929715 | 8 | 4.518041 |
| rs702349   | SAMD5     | 6 | 147929715 | 7 | 0.423338 |
| rs702350   | SAMD5     | 6 | 147930187 | 8 | 2.552652 |
| rs702351   | SAMD5     | 6 | 147930620 | 4 | 0.48433  |
| rs702351   | SAMD5     | 6 | 147930620 | 1 | 1.219561 |
| rs2294787  | SASH1     | 6 | 148896677 | 6 | 0.361552 |
| rs7896     | MAP3K7IP2 | 6 | 149773169 | 2 | 5.282527 |
| rs7896     | MAP3K7IP2 | 6 | 149773169 | 5 | 0.857177 |
| rs7896     | MAP3K7IP2 | 6 | 149773169 | 4 | 3.815791 |
| rs2744434  | MAP3K7IP2 | 6 | 149773597 | 2 | 3.225476 |
| rs7747948  | ZC3H12D   | 6 | 149837215 | 5 | 1.294159 |
| rs10872646 | NUP43     | 6 | 150109368 | 5 | 0.506919 |
| rs10872646 | NUP43     | 6 | 150109368 | 1 | 0.725853 |
| rs10457852 | LOC442267 | 6 | 150243413 | 4 | 1.355159 |
| rs10457852 | LOC442267 | 6 | 150243413 | 6 | 1.504673 |
| rs10457852 | LOC442267 | 6 | 150243413 | 2 | 4.624968 |
| rs10457852 | LOC442267 | 6 | 150243413 | 5 | 0.182591 |
| rs4870078  | LOC442267 | 6 | 150243505 | 4 | 0.388999 |
| rs4870078  | LOC442267 | 6 | 150243505 | 2 | 1.483895 |
| rs4870078  | LOC442267 | 6 | 150243505 | 6 | 0.357502 |
| rs4870078  | LOC442267 | 6 | 150243505 | 5 | 1.170112 |
| rs9397053  | LOC442267 | 6 | 150243726 | 1 | 0.466046 |
| rs9397053  | LOC442267 | 6 | 150243726 | 4 | 0.383766 |
| rs9397053  | LOC442267 | 6 | 150243726 | 8 | 1.887048 |
| rs2342767  | RAET1E    | 6 | 150251410 | 5 | 0.532276 |
| rs2342767  | RAET1E    | 6 | 150251410 | 2 | 0.244962 |
| rs2342767  | RAET1E    | 6 | 150251410 | 1 | 0.526869 |
| rs2342767  | RAET1E    | 6 | 150251410 | 6 | 2.796233 |
| rs9371533  | RAET1E    | 6 | 150252374 | 7 | 3.241453 |
| rs9371533  | RAET1E    | 6 | 150252374 | 1 | 0.792346 |
| rs9371533  | RAET1E    | 6 | 150252374 | 6 | 0.908601 |
| rs9371533  | RAET1E    | 6 | 150252374 | 5 | 1.063609 |

|            |             |   |           |   |          |
|------------|-------------|---|-----------|---|----------|
| rs9383921  | RAET1E      | 6 | 150252378 | 1 | 1.062301 |
| rs9383921  | RAET1E      | 6 | 150252378 | 6 | 0.797978 |
| rs9383921  | RAET1E      | 6 | 150252378 | 2 | 1.314887 |
| rs9383921  | RAET1E      | 6 | 150252378 | 5 | 0.840554 |
| rs2151910  | RAET1E      | 6 | 150252816 | 8 | 6.799639 |
| rs2151910  | RAET1E      | 6 | 150252816 | 5 | 0.452817 |
| rs9383583  | RAET1E      | 6 | 150253696 | 1 | 5.067795 |
| rs9383583  | RAET1E      | 6 | 150253696 | 4 | 1.185639 |
| rs9383583  | RAET1E      | 6 | 150253696 | 8 | 5.657567 |
| rs2076286  | IYD         | 6 | 150761073 | 6 | 0.123877 |
| rs2076285  | IYD         | 6 | 150761097 | 6 | 0.543503 |
| rs2076284  | IYD         | 6 | 150761306 | 6 | 0.215621 |
| rs675804   | IYD         | 6 | 150761403 | 6 | 0.000619 |
| rs675804   | IYD         | 6 | 150761403 | 7 | 0.895561 |
| rs675804   | IYD         | 6 | 150761403 | 1 | 0.709046 |
| rs675804   | IYD         | 6 | 150761403 | 8 | 0.145886 |
| rs672605   | IYD         | 6 | 150762132 | 1 | 1.967898 |
| rs672605   | IYD         | 6 | 150762132 | 7 | 1.160262 |
| rs9322260  | IYD         | 6 | 150762187 | 1 | 0.112269 |
| rs9322260  | IYD         | 6 | 150762187 | 4 | 0.607839 |
| rs9322260  | IYD         | 6 | 150762187 | 6 | 0.961229 |
| rs9322260  | IYD         | 6 | 150762187 | 7 | 0.237374 |
| rs601223   | IYD         | 6 | 150762264 | 1 | 0.036119 |
| rs601223   | IYD         | 6 | 150762264 | 7 | 0.327968 |
| rs660153   | IYD         | 6 | 150762601 | 7 | 0.254682 |
| rs660153   | IYD         | 6 | 150762601 | 1 | 1.661694 |
| rs587713   | IYD         | 6 | 150762922 | 6 | 0.639374 |
| rs657972   | IYD         | 6 | 150763094 | 5 | 1.104255 |
| rs657972   | IYD         | 6 | 150763094 | 1 | 0.524512 |
| rs657972   | IYD         | 6 | 150763094 | 7 | 0.65193  |
| rs657972   | IYD         | 6 | 150763094 | 6 | 1.906041 |
| rs6911086  | IYD         | 6 | 150763138 | 6 | 0.927458 |
| rs6911086  | IYD         | 6 | 150763138 | 5 | 1.326882 |
| rs6933986  | IYD         | 6 | 150763808 | 5 | 0.041389 |
| rs11758050 | IYD         | 6 | 150763903 | 4 | 0.268042 |
| rs11758050 | IYD         | 6 | 150763903 | 7 | 1.112735 |
| rs11758050 | IYD         | 6 | 150763903 | 5 | 0.354141 |
| rs7763368  | IYD         | 6 | 150765309 | 5 | 0.201996 |
| rs652042   | IYD         | 6 | 150765757 | 8 | 2.911161 |
| rs3734737  | IYD         | 6 | 150766546 | 2 | 1.929545 |
| rs3734737  | IYD         | 6 | 150766546 | 7 | 0.806386 |
| rs3734737  | IYD         | 6 | 150766546 | 5 | 3.59436  |
| rs3734737  | IYD         | 6 | 150766546 | 4 | 0.230772 |
| rs956440   | IYD         | 6 | 150766971 | 7 | 0.218501 |
| rs803413   | RP1-44A20.4 | 6 | 151190770 | 4 | 0.056823 |
| rs803413   | RP1-44A20.4 | 6 | 151190770 | 7 | 0.402538 |
| rs17080414 | PLEKHG1     | 6 | 151206162 | 8 | 4.587243 |

|                |          |   |           |   |          |
|----------------|----------|---|-----------|---|----------|
| rs9397027      | PLEKHG1  | 6 | 151206457 | 3 | 0.316532 |
| rs2294792      | AKAP12   | 6 | 151668727 | 3 | 1.101382 |
| rs2294792      | AKAP12   | 6 | 151668727 | 4 | 0.579922 |
| rs2294792      | AKAP12   | 6 | 151668727 | 2 | 2.070489 |
| rs2294792      | AKAP12   | 6 | 151668727 | 8 | 2.231675 |
| rs2294792      | AKAP12   | 6 | 151668727 | 5 | 0.028452 |
| rs3734799      | AKAP12   | 6 | 151711865 | 2 | 5.529771 |
| rs900654       | AKAP12   | 6 | 151712590 | 2 | 2.506756 |
| rs900654       | AKAP12   | 6 | 151712590 | 8 | 3.924125 |
| SNP6-151713978 | AKAP12   | 6 | 151713978 | 7 | 5.757814 |
| SNP6-151713978 | AKAP12   | 6 | 151713978 | 2 | 1.248719 |
| rs9478198      | AKAP12   | 6 | 151715106 | 5 | 0.367344 |
| rs12201388     | AKAP12   | 6 | 151715282 | 2 | 2.056394 |
| rs12201388     | AKAP12   | 6 | 151715282 | 7 | 0.667216 |
| SNP6-151715963 | AKAP12   | 6 | 151715963 | 2 | 3.783418 |
| SNP6-151715963 | AKAP12   | 6 | 151715963 | 7 | 0.105121 |
| rs1065310      | RMND1    | 6 | 151767993 | 8 | 6.390764 |
| rs1065310      | RMND1    | 6 | 151767993 | 4 | 4.02969  |
| rs3736175      | RMND1    | 6 | 151814857 | 1 | 3.696655 |
| rs13201167     | C6orf211 | 6 | 151815197 | 4 | 0.66626  |
| rs13201167     | C6orf211 | 6 | 151815197 | 8 | 1.336213 |
| rs13201167     | C6orf211 | 6 | 151815197 | 1 | 0.530863 |
| rs13201167     | C6orf211 | 6 | 151815197 | 7 | 0.344048 |
| rs13201167     | C6orf211 | 6 | 151815197 | 2 | 0.745769 |
| rs17081470     | C6orf97  | 6 | 151955958 | 7 | 1.363786 |
| rs17081470     | C6orf97  | 6 | 151955958 | 5 | 0.720825 |
| rs6929137      | C6orf97  | 6 | 151978370 | 6 | 0.583692 |
| rs6929137      | C6orf97  | 6 | 151978370 | 3 | 0.93094  |
| rs6929137      | C6orf97  | 6 | 151978370 | 5 | 1.35922  |
| rs6929137      | C6orf97  | 6 | 151978370 | 7 | 1.190866 |
| rs6932260      | C6orf97  | 6 | 151981253 | 3 | 1.664458 |
| rs6932260      | C6orf97  | 6 | 151981253 | 6 | 4.694445 |
| rs6932260      | C6orf97  | 6 | 151981253 | 2 | 2.872073 |
| rs6932260      | C6orf97  | 6 | 151981253 | 1 | 2.714201 |
| rs6904261      | C6orf97  | 6 | 151981320 | 7 | 4.814558 |
| rs6904261      | C6orf97  | 6 | 151981320 | 5 | 0.288846 |
| rs6904261      | C6orf97  | 6 | 151981320 | 6 | 1.101802 |
| rs6904261      | C6orf97  | 6 | 151981320 | 3 | 0.671217 |
| rs6932603      | C6orf97  | 6 | 151981463 | 6 | 0.295854 |
| rs6932603      | C6orf97  | 6 | 151981463 | 1 | 0.364046 |
| rs6932603      | C6orf97  | 6 | 151981463 | 3 | 0.691218 |
| rs6932603      | C6orf97  | 6 | 151981463 | 2 | 5.604427 |
| SNP6-151981566 | C6orf97  | 6 | 151981566 | 3 | 0.126351 |
| SNP6-151981566 | C6orf97  | 6 | 151981566 | 1 | 1.145814 |
| SNP6-151982713 | C6orf97  | 6 | 151982713 | 7 | 1.183377 |
| rs3734806      | C6orf97  | 6 | 151983154 | 5 | 1.026133 |
| rs3734806      | C6orf97  | 6 | 151983154 | 7 | 0.937657 |

|                |       |   |           |   |          |
|----------------|-------|---|-----------|---|----------|
| rs2077647      | ESR1  | 6 | 152170770 | 5 | 3.517146 |
| rs2077647      | ESR1  | 6 | 152170770 | 4 | 2.40123  |
| rs2228480      | ESR1  | 6 | 152461788 | 2 | 3.048132 |
| rs2228480      | ESR1  | 6 | 152461788 | 4 | 0.700944 |
| rs2228480      | ESR1  | 6 | 152461788 | 3 | 0.739585 |
| rs3798577      | ESR1  | 6 | 152462823 | 6 | 1.977944 |
| rs3798577      | ESR1  | 6 | 152462823 | 2 | 4.074928 |
| rs3798577      | ESR1  | 6 | 152462823 | 4 | 0.149706 |
| rs3798577      | ESR1  | 6 | 152462823 | 3 | 0.43616  |
| rs3798577      | ESR1  | 6 | 152462823 | 5 | 1.428467 |
| rs3798758      | ESR1  | 6 | 152463547 | 5 | 3.513143 |
| rs3798758      | ESR1  | 6 | 152463547 | 8 | 1.706784 |
| rs2295190      | SYNE1 | 6 | 152485437 | 4 | 0.626396 |
| rs2295190      | SYNE1 | 6 | 152485437 | 5 | 0.140036 |
| SNP6-152494984 | SYNE1 | 6 | 152494984 | 3 | 0.164265 |
| rs2747662      | SYNE1 | 6 | 152508367 | 5 | 1.175151 |
| rs2747662      | SYNE1 | 6 | 152508367 | 4 | 0.64708  |
| rs2747662      | SYNE1 | 6 | 152508367 | 1 | 0.7005   |
| rs2747662      | SYNE1 | 6 | 152508367 | 3 | 0.292098 |
| rs2252755      | SYNE1 | 6 | 152510881 | 1 | 0.317801 |
| rs2252755      | SYNE1 | 6 | 152510881 | 3 | 0.349751 |
| rs2252748      | SYNE1 | 6 | 152511024 | 7 | 0.848612 |
| rs2252748      | SYNE1 | 6 | 152511024 | 5 | 0.634763 |
| rs2252748      | SYNE1 | 6 | 152511024 | 4 | 1.301128 |
| rs2252748      | SYNE1 | 6 | 152511024 | 1 | 0.700497 |
| rs2252748      | SYNE1 | 6 | 152511024 | 3 | 0.079268 |
| rs12664753     | SYNE1 | 6 | 152656893 | 2 | 3.167848 |
| rs12664753     | SYNE1 | 6 | 152656893 | 5 | 0.436768 |
| rs12664753     | SYNE1 | 6 | 152656893 | 7 | 0.508893 |
| rs12664753     | SYNE1 | 6 | 152656893 | 8 | 1.031567 |
| rs2306916      | SYNE1 | 6 | 152689374 | 4 | 6.360752 |
| rs2306916      | SYNE1 | 6 | 152689374 | 1 | 5.494886 |
| rs2306916      | SYNE1 | 6 | 152689374 | 7 | 0.227611 |
| rs10499268     | SYNE1 | 6 | 152694292 | 3 | 0.897606 |
| rs28385621     | SYNE1 | 6 | 152699834 | 3 | 0.417327 |
| rs4645434      | SYNE1 | 6 | 152706954 | 2 | 2.678715 |
| rs4645434      | SYNE1 | 6 | 152706954 | 1 | 0.1578   |
| rs4645434      | SYNE1 | 6 | 152706954 | 4 | 0.642522 |
| rs4645434      | SYNE1 | 6 | 152706954 | 6 | 1.704514 |
| SNP6-152717547 | SYNE1 | 6 | 152717547 | 1 | 0.539165 |
| SNP6-152717547 | SYNE1 | 6 | 152717547 | 6 | 0.006989 |
| SNP6-152717547 | SYNE1 | 6 | 152717547 | 4 | 1.107564 |
| rs6913579      | SYNE1 | 6 | 152735877 | 6 | 0.414569 |
| rs6913579      | SYNE1 | 6 | 152735877 | 1 | 0.386708 |
| rs6913579      | SYNE1 | 6 | 152735877 | 2 | 1.791189 |
| rs6913579      | SYNE1 | 6 | 152735877 | 4 | 2.240939 |
| rs688136       | VIP   | 6 | 153121754 | 6 | 4.440028 |

|            |           |   |           |   |          |
|------------|-----------|---|-----------|---|----------|
| rs1713     | FBXO5     | 6 | 153333616 | 6 | 4.168344 |
| rs2073260  | FBXO5     | 6 | 153338234 | 2 | 1.650827 |
| rs2073260  | FBXO5     | 6 | 153338234 | 4 | 0.027761 |
| rs2073260  | FBXO5     | 6 | 153338234 | 8 | 0.477236 |
| rs2073260  | FBXO5     | 6 | 153338234 | 1 | 0.488851 |
| rs2073260  | FBXO5     | 6 | 153338234 | 3 | 0.243215 |
| rs2073262  | LOC729616 | 6 | 153346281 | 2 | 3.514232 |
| rs17085103 | PIP3-E    | 6 | 154517641 | 7 | 0.589249 |
| rs9479767  | PIP3-E    | 6 | 154518220 | 3 | 0.075087 |
| rs17277929 | PIP3-E    | 6 | 154519605 | 1 | 1.138434 |
| rs17277929 | PIP3-E    | 6 | 154519605 | 5 | 0.112961 |
| rs2236256  | PIP3-E    | 6 | 154520132 | 3 | 0.185255 |
| rs2236259  | PIP3-E    | 6 | 154520585 | 3 | 0.558779 |
| rs9371823  | LOC646274 | 6 | 155070602 | 5 | 1.053287 |
| rs931312   | TIAM2     | 6 | 155493044 | 3 | 1.784721 |
| rs931312   | TIAM2     | 6 | 155493044 | 7 | 0.902198 |
| rs931312   | TIAM2     | 6 | 155493044 | 1 | 3.104946 |
| rs41284214 | TIAM2     | 6 | 155528211 | 1 | 4.256725 |
| rs41284214 | TIAM2     | 6 | 155528211 | 6 | 6.545592 |
| rs1048584  | TIAM2     | 6 | 155620291 | 5 | 0.021509 |
| rs1048584  | TIAM2     | 6 | 155620291 | 3 | 0.029488 |
| rs1048584  | TIAM2     | 6 | 155620291 | 8 | 7.604137 |
| rs1048587  | TIAM2     | 6 | 155620376 | 6 | 1.99312  |
| rs9480098  | CLDN20    | 6 | 155627017 | 4 | 0.288154 |
| rs9480098  | CLDN20    | 6 | 155627017 | 5 | 0.357353 |
| rs9480098  | CLDN20    | 6 | 155627017 | 2 | 5.831857 |
| rs927718   | CLDN20    | 6 | 155638593 | 3 | 0.91138  |
| rs927718   | CLDN20    | 6 | 155638593 | 8 | 0.702086 |
| rs927718   | CLDN20    | 6 | 155638593 | 5 | 0.874891 |
| rs577      | SNX9      | 6 | 158285023 | 7 | 5.70888  |
| rs577      | SNX9      | 6 | 158285023 | 1 | 3.181752 |
| rs577      | SNX9      | 6 | 158285023 | 6 | 1.001336 |
| rs2296507  | SYNJ2     | 6 | 158419290 | 7 | 0.794012 |
| rs2296507  | SYNJ2     | 6 | 158419290 | 5 | 0.224032 |
| rs2502598  | SYNJ2     | 6 | 158439177 | 7 | 9.018729 |
| rs4478433  | TULP4     | 6 | 158653875 | 6 | 0.33233  |
| rs9456307  | TULP4     | 6 | 158849430 | 6 | 0.955946 |
| rs3749854  | TULP4     | 6 | 158849477 | 6 | 0.473545 |
| rs3749854  | TULP4     | 6 | 158849477 | 4 | 0.127176 |
| rs3749854  | TULP4     | 6 | 158849477 | 5 | 0.238601 |
| rs6880     | TULP4     | 6 | 158852805 | 8 | 0.39082  |
| rs6880     | TULP4     | 6 | 158852805 | 3 | 0.066979 |
| rs6880     | TULP4     | 6 | 158852805 | 5 | 0.234853 |
| rs6880     | TULP4     | 6 | 158852805 | 4 | 0.441006 |
| rs3123101  | SYTL3     | 6 | 159105551 | 6 | 0.026585 |
| rs3123101  | SYTL3     | 6 | 159105551 | 4 | 5.648347 |
| rs3123101  | SYTL3     | 6 | 159105551 | 8 | 0.577811 |

|                |           |   |           |   |          |
|----------------|-----------|---|-----------|---|----------|
| rs3123101      | SYTL3     | 6 | 159105551 | 3 | 0.961527 |
| rs34582178     | RSPH3     | 6 | 159327434 | 4 | 6.003238 |
| rs34582178     | RSPH3     | 6 | 159327434 | 3 | 1.383274 |
| rs34582178     | RSPH3     | 6 | 159327434 | 1 | 4.887185 |
| rs41267753     | RSPH3     | 6 | 159327435 | 7 | 1.89268  |
| rs4709266      | TAGAP     | 6 | 159376254 | 4 | 0.817781 |
| rs4709266      | TAGAP     | 6 | 159376254 | 3 | 0.400758 |
| rs4709266      | TAGAP     | 6 | 159376254 | 7 | 1.023849 |
| rs2235822      | TAGAP     | 6 | 159376830 | 3 | 0.077452 |
| rs2235822      | TAGAP     | 6 | 159376830 | 4 | 1.279548 |
| rs1738074      | TAGAP     | 6 | 159385965 | 4 | 0.287632 |
| rs1738074      | TAGAP     | 6 | 159385965 | 5 | 0.01797  |
| rs1738074      | TAGAP     | 6 | 159385965 | 1 | 0.560498 |
| rs509648       | FNDC1     | 6 | 159570966 | 8 | 1.536001 |
| SNP6-159575074 | FNDC1     | 6 | 159575074 | 4 | 1.297731 |
| SNP6-159575373 | FNDC1     | 6 | 159575373 | 4 | 2.540841 |
| SNP6-159580869 | FNDC1     | 6 | 159580869 | 4 | 0.303244 |
| rs551392       | FNDC1     | 6 | 159592409 | 8 | 6.246986 |
| rs551392       | FNDC1     | 6 | 159592409 | 5 | 4.453884 |
| rs294899       | FNDC1     | 6 | 159592445 | 5 | 3.650544 |
| rs294899       | FNDC1     | 6 | 159592445 | 4 | 0.234611 |
| rs550443       | FNDC1     | 6 | 159592532 | 8 | 1.96276  |
| rs550443       | FNDC1     | 6 | 159592532 | 5 | 0.589665 |
| rs419009       | FNDC1     | 6 | 159612586 | 4 | 5.074878 |
| rs5746136      | SOD2      | 6 | 160023074 | 4 | 4.326375 |
| rs5746136      | SOD2      | 6 | 160023074 | 5 | 0.142504 |
| rs9347344      | ACAT2     | 6 | 160118349 | 5 | 0.832745 |
| rs3818299      | SNORA29   | 6 | 160126621 | 8 | 6.099087 |
| rs3818299      | SNORA29   | 6 | 160126621 | 3 | 0.852574 |
| rs3818299      | SNORA29   | 6 | 160126621 | 5 | 5.527515 |
| rs1128670      | MRPL18    | 6 | 160131626 | 8 | 5.443382 |
| rs1128670      | MRPL18    | 6 | 160131626 | 3 | 2.900729 |
| rs8191808      | IGF2R     | 6 | 160389500 | 7 | 0.160838 |
| rs614754       | IGF2R     | 6 | 160425189 | 8 | 7.0083   |
| rs1888727      | LOC729603 | 6 | 160434531 | 8 | 0.999511 |
| rs1888727      | LOC729603 | 6 | 160434531 | 3 | 1.177737 |
| rs1888727      | LOC729603 | 6 | 160434531 | 4 | 3.701976 |
| rs1888727      | LOC729603 | 6 | 160434531 | 5 | 1.521024 |
| rs1803989      | IGF2R     | 6 | 160437471 | 4 | 0.991821 |
| rs1803989      | IGF2R     | 6 | 160437471 | 2 | 4.662958 |
| rs1867351      | SLC22A1   | 6 | 160463113 | 1 | 0.732163 |
| rs1867351      | SLC22A1   | 6 | 160463113 | 4 | 0.246118 |
| rs1867351      | SLC22A1   | 6 | 160463113 | 3 | 0.224164 |
| rs1867351      | SLC22A1   | 6 | 160463113 | 5 | 2.290537 |
| rs12208357     | SLC22A1   | 6 | 160463138 | 7 | 0.379327 |
| rs624249       | SLC22A2   | 6 | 160599390 | 5 | 1.57391  |
| rs2292334      | SLC22A3   | 6 | 160778178 | 1 | 2.672586 |

|            |           |   |           |   |          |
|------------|-----------|---|-----------|---|----------|
| rs2292334  | SLC22A3   | 6 | 160778178 | 5 | 0.776972 |
| rs3088441  | SLC22A3   | 6 | 160792599 | 1 | 5.003026 |
| rs2076828  | SLC22A3   | 6 | 160792776 | 6 | 0.04151  |
| rs2076828  | SLC22A3   | 6 | 160792776 | 4 | 0.225573 |
| rs2076828  | SLC22A3   | 6 | 160792776 | 5 | 1.129738 |
| rs2076828  | SLC22A3   | 6 | 160792776 | 8 | 0.633545 |
| rs2076828  | SLC22A3   | 6 | 160792776 | 3 | 1.559853 |
| rs14224    | PLG       | 6 | 161057769 | 3 | 0.338477 |
| rs9458136  | AGPAT4    | 6 | 161471208 | 3 | 0.238483 |
| rs9458136  | AGPAT4    | 6 | 161471208 | 2 | 4.612983 |
| rs11759408 | AGPAT4    | 6 | 161474798 | 7 | 1.37093  |
| rs11759408 | AGPAT4    | 6 | 161474798 | 5 | 0.678759 |
| rs3734462  | AGPAT4    | 6 | 161477652 | 8 | 4.56966  |
| rs6934457  | RIPPLY2   | 6 | 161502525 | 1 | 0.570556 |
| rs6934457  | RIPPLY2   | 6 | 161502525 | 2 | 1.213004 |
| rs6934457  | RIPPLY2   | 6 | 161502525 | 3 | 0.712736 |
| rs6934457  | RIPPLY2   | 6 | 161502525 | 5 | 0.24188  |
| rs9306     | PACRG     | 6 | 163656194 | 4 | 0.344927 |
| rs3756879  | QKI       | 6 | 163910298 | 4 | 0.304069 |
| rs3756879  | QKI       | 6 | 163910298 | 3 | 0.077971 |
| rs1511746  | PDE10A    | 6 | 165721780 | 6 | 1.202823 |
| rs220740   | PDE10A    | 6 | 165752217 | 1 | 4.126447 |
| rs9459553  | LOC346085 | 6 | 166398372 | 5 | 0.562893 |
| rs3099270  | T         | 6 | 166491515 | 3 | 2.311252 |
| rs3099270  | T         | 6 | 166491515 | 1 | 2.185036 |
| rs16898752 | T         | 6 | 166491543 | 3 | 2.504067 |
| rs16898752 | T         | 6 | 166491543 | 6 | 3.328946 |
| rs16898752 | T         | 6 | 166491543 | 2 | 2.351457 |
| rs16898752 | T         | 6 | 166491543 | 1 | 2.642891 |
| rs3127328  | T         | 6 | 166492035 | 6 | 3.99092  |
| rs2305089  | T         | 6 | 166499260 | 1 | 0.507089 |
| rs2305089  | T         | 6 | 166499260 | 6 | 0.321804 |
| rs2305089  | T         | 6 | 166499260 | 5 | 0.124196 |
| rs3099266  | T         | 6 | 166501137 | 5 | 0.392816 |
| rs3099266  | T         | 6 | 166501137 | 3 | 0.373367 |
| rs1546854  | BRP44L    | 6 | 166716423 | 7 | 0.414894 |
| rs1546854  | BRP44L    | 6 | 166716423 | 5 | 3.558116 |
| rs2984     | RPS6KA2   | 6 | 166746011 | 5 | 0.519552 |
| rs2984     | RPS6KA2   | 6 | 166746011 | 7 | 1.000589 |
| rs2984     | RPS6KA2   | 6 | 166746011 | 6 | 4.351451 |
| rs2984     | RPS6KA2   | 6 | 166746011 | 1 | 3.34669  |
| rs6911624  | LOC645468 | 6 | 167034039 | 5 | 0.359856 |
| rs6911624  | LOC645468 | 6 | 167034039 | 3 | 1.895436 |
| rs6911624  | LOC645468 | 6 | 167034039 | 1 | 2.800977 |
| rs3817828  | LOC645468 | 6 | 167036150 | 6 | 4.358297 |
| rs3817828  | LOC645468 | 6 | 167036150 | 4 | 1.264854 |
| rs3817828  | LOC645468 | 6 | 167036150 | 2 | 4.520624 |

|                |           |   |           |   |          |
|----------------|-----------|---|-----------|---|----------|
| rs3817828      | LOC645468 | 6 | 167036150 | 8 | 0.136906 |
| rs3817828      | LOC645468 | 6 | 167036150 | 5 | 3.81434  |
| rs3093007      | CCR6      | 6 | 167469765 | 4 | 0.538638 |
| rs3093007      | CCR6      | 6 | 167469765 | 1 | 2.552467 |
| rs2071171      | CCR6      | 6 | 167470032 | 1 | 3.465876 |
| rs2071171      | CCR6      | 6 | 167470032 | 7 | 1.116174 |
| rs2071171      | CCR6      | 6 | 167470032 | 3 | 1.059698 |
| rs2071171      | CCR6      | 6 | 167470032 | 8 | 0.55613  |
| rs3093006      | CCR6      | 6 | 167471442 | 5 | 2.142008 |
| rs2076005      | UNC93A    | 6 | 167624934 | 3 | 0.586837 |
| rs2076005      | UNC93A    | 6 | 167624934 | 1 | 2.036871 |
| rs909545       | TTLL2     | 6 | 167674651 | 3 | 1.922284 |
| rs909546       | TTLL2     | 6 | 167674692 | 3 | 0.579309 |
| rs909546       | TTLL2     | 6 | 167674692 | 7 | 0.206361 |
| rs909546       | TTLL2     | 6 | 167674692 | 6 | 0.111568 |
| rs909546       | TTLL2     | 6 | 167674692 | 2 | 1.043707 |
| SNP6-167674700 | TTLL2     | 6 | 167674700 | 1 | 1.97023  |
| SNP6-167674700 | TTLL2     | 6 | 167674700 | 6 | 0.725444 |
| rs2981978      | TTLL2     | 6 | 167675423 | 3 | 0.726146 |
| rs3213590      | MLLT4     | 6 | 168058827 | 5 | 0.390314 |
| rs9364373      | MLLT4     | 6 | 168106838 | 3 | 7.316446 |
| rs9364373      | MLLT4     | 6 | 168106838 | 1 | 6.027478 |
| rs9364373      | MLLT4     | 6 | 168106838 | 7 | 3.097444 |
| rs1415         | MLLT4     | 6 | 168107720 | 3 | 0.15567  |
| rs1415         | MLLT4     | 6 | 168107720 | 1 | 4.312515 |
| rs1415         | MLLT4     | 6 | 168107720 | 7 | 0.787423 |
| rs1044292      | MLLT4     | 6 | 168114604 | 5 | 0.668104 |
| rs2171982      | C6orf54   | 6 | 168137269 | 6 | 0.705928 |
| rs1132782      | THBS2     | 6 | 169358348 | 7 | 0.752693 |
| rs7382711      | THBS2     | 6 | 169363461 | 1 | 4.315747 |
| rs7382711      | THBS2     | 6 | 169363461 | 4 | 0.680325 |
| rs7382711      | THBS2     | 6 | 169363461 | 5 | 1.173831 |
| rs34987335     | THBS2     | 6 | 169376821 | 2 | 2.664607 |
| rs6941625      | WDR27     | 6 | 169724852 | 8 | 0.29718  |
| rs6941625      | WDR27     | 6 | 169724852 | 7 | 0.21839  |
| rs6941625      | WDR27     | 6 | 169724852 | 4 | 0.245048 |
| rs6941625      | WDR27     | 6 | 169724852 | 5 | 0.588425 |
| rs9478086      | WDR27     | 6 | 169793974 | 8 | 1.380154 |
| rs9478086      | WDR27     | 6 | 169793974 | 1 | 5.019065 |
| rs4716383      | C6orf120  | 6 | 169844192 | 5 | 0.338791 |
| rs13194101     | TCTE3     | 6 | 169885225 | 4 | 1.480303 |
| rs3807067      | C6orf122  | 6 | 169932125 | 7 | 0.674205 |
| rs3807067      | C6orf122  | 6 | 169932125 | 2 | 1.728085 |
| rs3807067      | C6orf122  | 6 | 169932125 | 1 | 0.611696 |
| rs3807067      | C6orf122  | 6 | 169932125 | 5 | 3.384365 |
| rs3734776      | DLL1      | 6 | 170434870 | 7 | 0.339495 |
| rs17860736     | FAM120B   | 6 | 170457833 | 8 | 1.105422 |



|              |         |   |           |   |          |
|--------------|---------|---|-----------|---|----------|
| rs17860736   | FAM120B | 6 | 170457833 | 3 | 0.140406 |
| rs12717      | PSMB1   | 6 | 170704225 | 3 | 0.052879 |
| rs12717      | PSMB1   | 6 | 170704225 | 5 | 0.244342 |
| rs12717      | PSMB1   | 6 | 170704225 | 2 | 4.803895 |
| rs12717      | PSMB1   | 6 | 170704225 | 4 | 0.050188 |
| rs12717      | PSMB1   | 6 | 170704225 | 6 | 0.160394 |
| rs12189695   | PDCD2   | 6 | 170732968 | 5 | 1.158089 |
| rs12189695   | PDCD2   | 6 | 170732968 | 6 | 2.077309 |
| rs4720951    | HEATR2  | 7 | 776745    | 8 | 9.429387 |
| rs4720951    | HEATR2  | 7 | 776745    | 1 | 0.042059 |
| rs4720951    | HEATR2  | 7 | 776745    | 2 | 3.359089 |
| rs4720951    | HEATR2  | 7 | 776745    | 4 | 0.65003  |
| rs4720951    | HEATR2  | 7 | 776745    | 3 | 0.62177  |
| rs3922641    | HEATR2  | 7 | 781314    | 3 | 0.17636  |
| rs3922641    | HEATR2  | 7 | 781314    | 1 | 0.831125 |
| rs3922641    | HEATR2  | 7 | 781314    | 8 | 1.517995 |
| rs3922641    | HEATR2  | 7 | 781314    | 2 | 0.088579 |
| rs9458       | HEATR2  | 7 | 792020    | 4 | 0.313925 |
| rs13171      | C7orf20 | 7 | 897215    | 5 | 4.464716 |
| rs13171      | C7orf20 | 7 | 897215    | 4 | 0.134708 |
| SNP7-906707  | CENTA1  | 7 | 906707    | 2 | 0.573081 |
| rs8591       | C7orf50 | 7 | 1003325   | 5 | 5.850382 |
| rs11761941   | GPR146  | 7 | 1063709   | 6 | 0.759067 |
| rs3808351    | GPER    | 7 | 1093185   | 5 | 0.563083 |
| rs3808351    | GPER    | 7 | 1093185   | 1 | 4.451217 |
| rs3802141    | GPER    | 7 | 1097882   | 1 | 1.734683 |
| rs3802141    | GPER    | 7 | 1097882   | 4 | 0.625381 |
| rs3802141    | GPER    | 7 | 1097882   | 2 | 1.739558 |
| rs3802141    | GPER    | 7 | 1097882   | 5 | 0.888854 |
| SNP7-1099197 | GPER    | 7 | 1099197   | 1 | 5.722961 |
| SNP7-1099197 | GPER    | 7 | 1099197   | 6 | 6.25864  |
| rs1133043    | GPER    | 7 | 1099831   | 1 | 0.39104  |
| rs1133043    | GPER    | 7 | 1099831   | 4 | 5.08356  |
| rs1133043    | GPER    | 7 | 1099831   | 2 | 6.158295 |
| rs1133122    | ZFAND2A | 7 | 1159098   | 1 | 0.27911  |
| rs3752715    | INTS1   | 7 | 1509340   | 3 | 5.80619  |
| rs1369011    | INTS1   | 7 | 1510507   | 3 | 1.013946 |
| rs1369011    | INTS1   | 7 | 1510507   | 7 | 0.038685 |
| rs1369011    | INTS1   | 7 | 1510507   | 2 | 2.454256 |
| rs3735656    | MAFK    | 7 | 1547447   | 7 | 0.862626 |
| rs3735656    | MAFK    | 7 | 1547447   | 1 | 0.252447 |
| rs3735656    | MAFK    | 7 | 1547447   | 2 | 0.109909 |
| rs3735656    | MAFK    | 7 | 1547447   | 4 | 7.632833 |
| rs3735656    | MAFK    | 7 | 1547447   | 3 | 0.941217 |
| rs3735656    | MAFK    | 7 | 1547447   | 6 | 0.068257 |
| rs35932242   | NUDT1   | 7 | 2256162   | 6 | 7.069684 |
| rs2895       | LFNG    | 7 | 2535296   | 6 | 0.530562 |

|              |          |   |         |   |          |
|--------------|----------|---|---------|---|----------|
| SNP7-2612052 | IQCE     | 7 | 2612052 | 5 | 0.535237 |
| SNP7-2613322 | IQCE     | 7 | 2613322 | 2 | 6.196668 |
| rs3735110    | IQCE     | 7 | 2616345 | 5 | 0.006338 |
| rs3735110    | IQCE     | 7 | 2616345 | 3 | 0.441466 |
| rs3823603    | IQCE     | 7 | 2616749 | 5 | 0.200536 |
| rs3823603    | IQCE     | 7 | 2616749 | 3 | 0.112098 |
| rs13188      | TTYH3    | 7 | 2669990 | 2 | 4.444453 |
| rs798473     | AMZ1     | 7 | 2706541 | 8 | 0.865016 |
| rs7776970    | AMZ1     | 7 | 2719013 | 2 | 2.707928 |
| rs7778736    | AMZ1     | 7 | 2719458 | 1 | 1.213073 |
| rs7778736    | AMZ1     | 7 | 2719458 | 3 | 1.54     |
| rs7778736    | AMZ1     | 7 | 2719458 | 5 | 0.260614 |
| rs4719646    | AMZ1     | 7 | 2721151 | 6 | 0.363327 |
| rs4719646    | AMZ1     | 7 | 2721151 | 1 | 5.247832 |
| rs798531     | GNA12    | 7 | 2736593 | 1 | 3.089275 |
| rs798531     | GNA12    | 7 | 2736593 | 6 | 6.976497 |
| rs798531     | GNA12    | 7 | 2736593 | 7 | 0.30782  |
| rs1621509    | CARD11   | 7 | 2936206 | 6 | 4.854801 |
| rs1621509    | CARD11   | 7 | 2936206 | 2 | 4.597749 |
| rs659182     | SDK1     | 7 | 4155601 | 8 | 0.398665 |
| rs659182     | SDK1     | 7 | 4155601 | 2 | 0.415921 |
| rs659182     | SDK1     | 7 | 4155601 | 1 | 0.240092 |
| rs601424     | SDK1     | 7 | 4180403 | 7 | 1.084657 |
| rs601424     | SDK1     | 7 | 4180403 | 8 | 1.235472 |
| rs671756     | SDK1     | 7 | 4180466 | 2 | 1.531822 |
| rs671756     | SDK1     | 7 | 4180466 | 8 | 0.649127 |
| rs671756     | SDK1     | 7 | 4180466 | 6 | 1.591778 |
| rs671694     | SDK1     | 7 | 4180501 | 8 | 1.576952 |
| rs671694     | SDK1     | 7 | 4180501 | 1 | 1.320548 |
| rs3750019    | FOXX1    | 7 | 4775204 | 7 | 0.320157 |
| rs3750019    | FOXX1    | 7 | 4775204 | 1 | 3.245531 |
| rs17135096   | FOXX1    | 7 | 4776186 | 1 | 4.910369 |
| rs17135121   | KIAA0415 | 7 | 4790497 | 7 | 0.401217 |
| rs17135121   | KIAA0415 | 7 | 4790497 | 1 | 0.297981 |
| rs17135121   | KIAA0415 | 7 | 4790497 | 2 | 1.167952 |
| rs11772411   | KIAA0415 | 7 | 4791833 | 2 | 0.381658 |
| rs11772411   | KIAA0415 | 7 | 4791833 | 7 | 0.594411 |
| rs11772411   | KIAA0415 | 7 | 4791833 | 1 | 0.210217 |
| rs17135128   | KIAA0415 | 7 | 4793856 | 2 | 1.474756 |
| rs17135128   | KIAA0415 | 7 | 4793856 | 1 | 0.23522  |
| rs17135128   | KIAA0415 | 7 | 4793856 | 7 | 2.278904 |
| SNP7-4807839 | RADIL    | 7 | 4807839 | 7 | 0.201275 |
| rs3763384    | RADIL    | 7 | 4842583 | 6 | 0.995186 |
| rs3763384    | RADIL    | 7 | 4842583 | 8 | 3.876706 |
| rs3763384    | RADIL    | 7 | 4842583 | 3 | 0.853848 |
| rs3763384    | RADIL    | 7 | 4842583 | 7 | 0.121781 |
| rs17135247   | PAPOLB   | 7 | 4866867 | 8 | 5.18843  |

|               |           |   |          |   |          |
|---------------|-----------|---|----------|---|----------|
| rs6463205     | LOC729720 | 7 | 4988749  | 6 | 2.191641 |
| rs12674330    | RBAK      | 7 | 5070801  | 2 | 3.519152 |
| rs11771682    | RBAK      | 7 | 5071359  | 1 | 5.540017 |
| rs13244634    | WIPI2     | 7 | 5239990  | 2 | 1.754117 |
| rs13244634    | WIPI2     | 7 | 5239990  | 8 | 0.328268 |
| rs13244634    | WIPI2     | 7 | 5239990  | 4 | 1.534851 |
| rs13244634    | WIPI2     | 7 | 5239990  | 1 | 1.280838 |
| rs6950111     | SLC29A4   | 7 | 5305240  | 7 | 0.167782 |
| rs6950111     | SLC29A4   | 7 | 5305240  | 5 | 0.026042 |
| rs6950111     | SLC29A4   | 7 | 5305240  | 4 | 0.940962 |
| rs6950111     | SLC29A4   | 7 | 5305240  | 1 | 2.30604  |
| rs11975313    | FBXL18    | 7 | 5497480  | 6 | 4.118827 |
| rs2228006     | PMS2      | 7 | 5993301  | 1 | 5.227475 |
| rs2228006     | PMS2      | 7 | 5993301  | 6 | 3.462262 |
| SNP7-6159990  | USP42     | 7 | 6159990  | 4 | 0.623792 |
| SNP7-6160277  | USP42     | 7 | 6160277  | 1 | 2.396115 |
| rs17136052    | PSCD3     | 7 | 6169260  | 1 | 5.824203 |
| rs836559      | DAGLB     | 7 | 6415288  | 8 | 6.647189 |
| rs836559      | DAGLB     | 7 | 6415288  | 3 | 0.066034 |
| rs836559      | DAGLB     | 7 | 6415288  | 5 | 1.26011  |
| rs836559      | DAGLB     | 7 | 6415288  | 1 | 0.673946 |
| rs836559      | DAGLB     | 7 | 6415288  | 7 | 0.337968 |
| rs836559      | DAGLB     | 7 | 6415288  | 2 | 6.575769 |
| rs6463598     | LOC729834 | 7 | 6903863  | 8 | 2.286871 |
| rs6463598     | LOC729834 | 7 | 6903863  | 3 | 1.770014 |
| rs1047763     | C1GALT1   | 7 | 7250094  | 1 | 5.226867 |
| rs6952195     | COL28A1   | 7 | 7480760  | 5 | 0.875883 |
| rs6952195     | COL28A1   | 7 | 7480760  | 7 | 0.859996 |
| rs10486176    | COL28A1   | 7 | 7512216  | 5 | 0.656095 |
| rs17169194    | RPA3      | 7 | 7647222  | 2 | 2.855662 |
| rs12112667    | RPA3      | 7 | 7692110  | 1 | 4.200613 |
| rs12112667    | RPA3      | 7 | 7692110  | 4 | 0.647487 |
| rs1057947     | ICA1      | 7 | 8119504  | 6 | 6.78541  |
| SNP7-10988755 | PHF14     | 7 | 10988755 | 6 | 0.033897 |
| SNP7-10988755 | PHF14     | 7 | 10988755 | 8 | 0.304084 |
| SNP7-10988755 | PHF14     | 7 | 10988755 | 2 | 4.580528 |
| SNP7-10988755 | PHF14     | 7 | 10988755 | 5 | 0.678032 |
| rs1432        | THSD7A    | 7 | 11453464 | 3 | 0.150036 |
| rs1432        | THSD7A    | 7 | 11453464 | 8 | 0.040798 |
| rs2285744     | THSD7A    | 7 | 11476086 | 7 | 1.487013 |
| rs2285744     | THSD7A    | 7 | 11476086 | 4 | 1.027811 |
| rs3735502     | THSD7A    | 7 | 11488067 | 8 | 0.8559   |
| rs3735502     | THSD7A    | 7 | 11488067 | 4 | 0.504815 |
| rs3735502     | THSD7A    | 7 | 11488067 | 7 | 0.697145 |
| rs47          | THSD7A    | 7 | 11547646 | 1 | 0.081655 |
| rs47          | THSD7A    | 7 | 11547646 | 4 | 0.41857  |
| rs47          | THSD7A    | 7 | 11547646 | 7 | 0.300347 |

|               |           |   |          |   |          |
|---------------|-----------|---|----------|---|----------|
| rs2074603     | THSD7A    | 7 | 11547659 | 8 | 0.357045 |
| rs2074603     | THSD7A    | 7 | 11547659 | 7 | 0.860357 |
| rs2074603     | THSD7A    | 7 | 11547659 | 1 | 1.283667 |
| rs2074603     | THSD7A    | 7 | 11547659 | 4 | 0.34252  |
| rs2043539     | TMEM106B  | 7 | 12220405 | 7 | 1.314932 |
| rs2043539     | TMEM106B  | 7 | 12220405 | 1 | 5.782124 |
| rs2043539     | TMEM106B  | 7 | 12220405 | 5 | 0.55961  |
| rs2043539     | TMEM106B  | 7 | 12220405 | 3 | 0.036172 |
| rs6967385     | FLJ14712  | 7 | 12357844 | 7 | 0.397239 |
| rs6967385     | FLJ14712  | 7 | 12357844 | 2 | 7.340579 |
| rs6967241     | NULL      | 7 | 12385633 | 1 | 0.150554 |
| rs17165995    | NULL      | 7 | 12399872 | 7 | 7.069258 |
| rs11275       | LOC389465 | 7 | 12477837 | 2 | 3.630294 |
| rs2033604     | SCIN      | 7 | 12659665 | 1 | 0.39177  |
| rs2033604     | SCIN      | 7 | 12659665 | 6 | 0.575799 |
| rs2033604     | SCIN      | 7 | 12659665 | 7 | 1.173242 |
| rs2033604     | SCIN      | 7 | 12659665 | 3 | 0.952353 |
| rs2033604     | SCIN      | 7 | 12659665 | 5 | 0.591528 |
| rs2280633     | ARL4A     | 7 | 12694351 | 7 | 5.66592  |
| rs2280633     | ARL4A     | 7 | 12694351 | 3 | 0.234978 |
| rs2280633     | ARL4A     | 7 | 12694351 | 6 | 0.036304 |
| rs722661      | LOC646161 | 7 | 13878170 | 1 | 0.241934 |
| rs4721286     | ETV1      | 7 | 13898507 | 7 | 0.977382 |
| SNP7-13995233 | ETV1      | 7 | 13995233 | 4 | 0.224452 |
| SNP7-13995233 | ETV1      | 7 | 13995233 | 7 | 0.1865   |
| SNP7-13995233 | ETV1      | 7 | 13995233 | 5 | 0.561777 |
| SNP7-13995233 | ETV1      | 7 | 13995233 | 3 | 0.626431 |
| rs17167943    | DGKB      | 7 | 14182629 | 8 | 4.727565 |
| rs17167943    | DGKB      | 7 | 14182629 | 1 | 2.84442  |
| rs17167943    | DGKB      | 7 | 14182629 | 6 | 3.697968 |
| rs17167943    | DGKB      | 7 | 14182629 | 3 | 2.736407 |
| rs6966154     | DGKB      | 7 | 14184198 | 1 | 0.512308 |
| rs17199       | MEOX2     | 7 | 15618295 | 5 | 1.135873 |
| rs1050290     | MEOX2     | 7 | 15692591 | 4 | 1.036685 |
| rs1050290     | MEOX2     | 7 | 15692591 | 5 | 0.941621 |
| rs1050290     | MEOX2     | 7 | 15692591 | 3 | 2.411778 |
| rs1050290     | MEOX2     | 7 | 15692591 | 6 | 1.653172 |
| rs1044984     | ANKMY2    | 7 | 16606726 | 2 | 6.69747  |
| rs1044984     | ANKMY2    | 7 | 16606726 | 3 | 0.150328 |
| rs1044984     | ANKMY2    | 7 | 16606726 | 7 | 6.614339 |
| rs543387      | ANKMY2    | 7 | 16606883 | 2 | 3.013567 |
| rs543387      | ANKMY2    | 7 | 16606883 | 8 | 5.677731 |
| rs15504       | AGR2      | 7 | 16798062 | 7 | 0.78298  |
| rs15504       | AGR2      | 7 | 16798062 | 6 | 2.043193 |
| rs3800961     | PRPS1L1   | 7 | 18033607 | 3 | 3.287036 |
| rs3800961     | PRPS1L1   | 7 | 18033607 | 2 | 2.952551 |
| rs2074633     | HDAC9     | 7 | 19002445 | 2 | 2.679544 |

|               |         |   |          |   |          |
|---------------|---------|---|----------|---|----------|
| rs2526630     | HDAC9   | 7 | 19003103 | 2 | 4.085713 |
| rs2526630     | HDAC9   | 7 | 19003103 | 7 | 0.603563 |
| rs2526630     | HDAC9   | 7 | 19003103 | 3 | 0.172277 |
| rs7812296     | HDAC9   | 7 | 19003263 | 2 | 1.846396 |
| rs7812296     | HDAC9   | 7 | 19003263 | 3 | 0.895777 |
| rs7812296     | HDAC9   | 7 | 19003263 | 7 | 0.293675 |
| rs7776735     | HDAC9   | 7 | 19003434 | 3 | 0.447643 |
| rs2285925     | TMEM196 | 7 | 19726715 | 3 | 0.31129  |
| rs2285927     | TMEM196 | 7 | 19726958 | 8 | 2.737453 |
| SNP7-20166057 | 7A5     | 7 | 20166057 | 3 | 0.598336 |
| rs34603556    | ABCB5   | 7 | 20657572 | 3 | 0.479909 |
| rs10254317    | ABCB5   | 7 | 20734538 | 4 | 2.43225  |
| rs6461515     | ABCB5   | 7 | 20745171 | 5 | 0.042351 |
| rs3735440     | SP4     | 7 | 21517595 | 4 | 0.10297  |
| rs3735440     | SP4     | 7 | 21517595 | 3 | 0.750125 |
| rs3735440     | SP4     | 7 | 21517595 | 8 | 0.028881 |
| rs2285942     | DNAH11  | 7 | 21549442 | 5 | 0.973879 |
| rs2285942     | DNAH11  | 7 | 21549442 | 2 | 3.260281 |
| rs2285943     | DNAH11  | 7 | 21549488 | 8 | 1.551086 |
| rs2285943     | DNAH11  | 7 | 21549488 | 2 | 4.82201  |
| rs2285943     | DNAH11  | 7 | 21549488 | 1 | 4.625422 |
| rs10950854    | DNAH11  | 7 | 21565758 | 2 | 6.026049 |
| rs10950854    | DNAH11  | 7 | 21565758 | 4 | 4.040516 |
| rs10950854    | DNAH11  | 7 | 21565758 | 8 | 2.218499 |
| rs10269582    | DNAH11  | 7 | 21606886 | 6 | 2.402913 |
| rs10269582    | DNAH11  | 7 | 21606886 | 2 | 2.88382  |
| rs10269582    | DNAH11  | 7 | 21606886 | 1 | 3.65873  |
| rs10269582    | DNAH11  | 7 | 21606886 | 4 | 2.738168 |
| rs10224537    | DNAH11  | 7 | 21606930 | 5 | 1.511054 |
| rs10224537    | DNAH11  | 7 | 21606930 | 7 | 1.651378 |
| rs10224537    | DNAH11  | 7 | 21606930 | 6 | 1.476397 |
| rs10224537    | DNAH11  | 7 | 21606930 | 1 | 4.482511 |
| rs11768670    | DNAH11  | 7 | 21732022 | 3 | 1.525473 |
| rs11768670    | DNAH11  | 7 | 21732022 | 1 | 5.48777  |
| SNP7-21741894 | DNAH11  | 7 | 21741894 | 7 | 2.306621 |
| rs2072221     | DNAH11  | 7 | 21741968 | 1 | 3.831483 |
| rs2072221     | DNAH11  | 7 | 21741968 | 2 | 4.112882 |
| rs2072221     | DNAH11  | 7 | 21741968 | 8 | 2.334097 |
| rs2072221     | DNAH11  | 7 | 21741968 | 4 | 1.640594 |
| rs9639393     | DNAH11  | 7 | 21745803 | 2 | 1.805629 |
| rs9639393     | DNAH11  | 7 | 21745803 | 1 | 3.774258 |
| rs6965750     | DNAH11  | 7 | 21790647 | 7 | 0.175228 |
| rs6965750     | DNAH11  | 7 | 21790647 | 6 | 4.619467 |
| rs4722067     | DNAH11  | 7 | 21868091 | 7 | 0.950243 |
| rs4722067     | DNAH11  | 7 | 21868091 | 8 | 2.082317 |
| rs4722067     | DNAH11  | 7 | 21868091 | 2 | 2.971998 |
| rs4722067     | DNAH11  | 7 | 21868091 | 5 | 1.772607 |

|               |           |   |          |   |          |
|---------------|-----------|---|----------|---|----------|
| rs12537531    | DNAH11    | 7 | 21898569 | 2 | 3.738325 |
| rs12537531    | DNAH11    | 7 | 21898569 | 3 | 0.207365 |
| rs12537531    | DNAH11    | 7 | 21898569 | 8 | 0.3421   |
| rs12537531    | DNAH11    | 7 | 21898569 | 1 | 0.516599 |
| rs12537531    | DNAH11    | 7 | 21898569 | 7 | 1.792616 |
| SNP7-21907348 | DNAH11    | 7 | 21907348 | 4 | 7.975065 |
| SNP7-21907348 | DNAH11    | 7 | 21907348 | 7 | 0.68034  |
| rs2177142     | MGC87042  | 7 | 22425849 | 7 | 0.652934 |
| rs2177142     | MGC87042  | 7 | 22425849 | 6 | 1.716202 |
| rs2177142     | MGC87042  | 7 | 22425849 | 4 | 1.101313 |
| rs4607514     | FAM126A   | 7 | 22950227 | 8 | 7.838402 |
| rs4607514     | FAM126A   | 7 | 22950227 | 4 | 5.927505 |
| rs4607514     | FAM126A   | 7 | 22950227 | 3 | 0.372567 |
| rs4607514     | FAM126A   | 7 | 22950227 | 1 | 0.048645 |
| rs4607514     | FAM126A   | 7 | 22950227 | 2 | 6.18911  |
| rs858246      | NUPL2     | 7 | 23188017 | 5 | 1.669419 |
| rs858246      | NUPL2     | 7 | 23188017 | 1 | 2.114804 |
| rs858238      | NUPL2     | 7 | 23205658 | 5 | 6.672427 |
| rs858238      | NUPL2     | 7 | 23205658 | 1 | 3.52342  |
| rs858238      | NUPL2     | 7 | 23205658 | 4 | 6.241    |
| rs10634       | NUPL2     | 7 | 23207121 | 1 | 3.874741 |
| rs10634       | NUPL2     | 7 | 23207121 | 4 | 0.449451 |
| rs10634       | NUPL2     | 7 | 23207121 | 5 | 0.276296 |
| rs858291      | LOC730020 | 7 | 23213886 | 4 | 0.45656  |
| rs858291      | LOC730020 | 7 | 23213886 | 1 | 1.405784 |
| rs858291      | LOC730020 | 7 | 23213886 | 5 | 0.829095 |
| rs199355      | GPNMB     | 7 | 23263058 | 1 | 1.64558  |
| rs199355      | GPNMB     | 7 | 23263058 | 7 | 0.690959 |
| rs199355      | GPNMB     | 7 | 23263058 | 3 | 1.943075 |
| rs199354      | GPNMB     | 7 | 23263097 | 1 | 4.198612 |
| rs199354      | GPNMB     | 7 | 23263097 | 4 | 2.741906 |
| rs199354      | GPNMB     | 7 | 23263097 | 5 | 0.404906 |
| rs156404      | C7orf30   | 7 | 23307143 | 5 | 1.419256 |
| rs156404      | C7orf30   | 7 | 23307143 | 1 | 4.839563 |
| rs156404      | C7orf30   | 7 | 23307143 | 4 | 0.434907 |
| rs3087888     | IGF2BP3   | 7 | 23317605 | 7 | 0.243939 |
| rs156414      | IGF2BP3   | 7 | 23323846 | 7 | 0.605008 |
| rs156414      | IGF2BP3   | 7 | 23323846 | 3 | 0.521184 |
| rs156414      | IGF2BP3   | 7 | 23323846 | 1 | 0.571612 |
| rs156414      | IGF2BP3   | 7 | 23323846 | 2 | 1.469944 |
| rs4722266     | STK31     | 7 | 23760554 | 4 | 0.988215 |
| rs9785023     | NPY       | 7 | 24291534 | 6 | 1.278832 |
| rs9785023     | NPY       | 7 | 24291534 | 1 | 0.59451  |
| rs9785023     | NPY       | 7 | 24291534 | 5 | 1.37659  |
| rs9785023     | NPY       | 7 | 24291534 | 4 | 4.999098 |
| rs9785023     | NPY       | 7 | 24291534 | 3 | 1.880525 |
| rs12979       | DFNA5     | 7 | 24704689 | 5 | 0.305383 |

|            |           |   |          |   |          |
|------------|-----------|---|----------|---|----------|
| rs12979    | DFNA5     | 7 | 24704689 | 8 | 5.652117 |
| rs17274530 | DFNA5     | 7 | 24705140 | 2 | 5.231887 |
| rs1861525  | CYCS      | 7 | 25128127 | 8 | 1.343643 |
| rs1861525  | CYCS      | 7 | 25128127 | 7 | 1.325455 |
| rs2717885  | C7orf31   | 7 | 25140857 | 4 | 0.840681 |
| rs2717885  | C7orf31   | 7 | 25140857 | 1 | 1.865473 |
| rs2717886  | C7orf31   | 7 | 25141222 | 6 | 0.30072  |
| rs2717886  | C7orf31   | 7 | 25141222 | 7 | 0.591275 |
| rs2717886  | C7orf31   | 7 | 25141222 | 4 | 0.262987 |
| rs2717886  | C7orf31   | 7 | 25141222 | 8 | 0.04073  |
| rs2717886  | C7orf31   | 7 | 25141222 | 1 | 3.086639 |
| rs12671270 | LOC285941 | 7 | 26652459 | 8 | 2.226546 |
| rs12671270 | LOC285941 | 7 | 26652459 | 7 | 0.455516 |
| rs12671270 | LOC285941 | 7 | 26652459 | 6 | 1.442775 |
| rs17323934 | SKAP2     | 7 | 26870855 | 2 | 6.145727 |
| rs17323934 | SKAP2     | 7 | 26870855 | 7 | 0.332814 |
| rs6969780  | HOXA3     | 7 | 27125661 | 1 | 5.155313 |
| rs6969780  | HOXA3     | 7 | 27125661 | 7 | 0.216245 |
| rs6969780  | HOXA3     | 7 | 27125661 | 6 | 4.320147 |
| rs17471888 | HOXA4     | 7 | 27134538 | 8 | 0.319621 |
| rs17500863 | HOXA6     | 7 | 27152045 | 8 | 0.734568 |
| rs17500987 | HOXA9     | 7 | 27169710 | 8 | 5.927074 |
| rs17501090 | HOXA11    | 7 | 27187979 | 4 | 3.162914 |
| rs17501090 | HOXA11    | 7 | 27187979 | 1 | 3.844915 |
| rs17427861 | HOXA11    | 7 | 27188934 | 7 | 0.894789 |
| rs757181   | HOXA13    | 7 | 27203483 | 1 | 1.385598 |
| rs757181   | HOXA13    | 7 | 27203483 | 4 | 1.902868 |
| rs2074399  | EVX1      | 7 | 27249008 | 7 | 1.609869 |
| rs2190305  | CREB5     | 7 | 28825975 | 2 | 0.228988 |
| rs2190305  | CREB5     | 7 | 28825975 | 1 | 0.186163 |
| rs2190305  | CREB5     | 7 | 28825975 | 5 | 0.599501 |
| rs2190305  | CREB5     | 7 | 28825975 | 3 | 0.050624 |
| rs4722856  | CREB5     | 7 | 28826384 | 2 | 2.878683 |
| rs740252   | KIAA0644  | 7 | 28964290 | 4 | 1.344758 |
| rs7313     | CPVL      | 7 | 29036734 | 7 | 1.580473 |
| rs7313     | CPVL      | 7 | 29036734 | 6 | 4.13838  |
| rs7313     | CPVL      | 7 | 29036734 | 1 | 0.826585 |
| rs1052200  | CPVL      | 7 | 29036845 | 2 | 4.765587 |
| rs1052200  | CPVL      | 7 | 29036845 | 8 | 0.518623 |
| rs323182   | CPVL      | 7 | 29118896 | 7 | 2.491321 |
| rs323182   | CPVL      | 7 | 29118896 | 6 | 6.076805 |
| rs323182   | CPVL      | 7 | 29118896 | 8 | 0.644539 |
| rs2011337  | CPVL      | 7 | 29118941 | 6 | 3.64918  |
| rs2011337  | CPVL      | 7 | 29118941 | 8 | 1.410288 |
| rs1059182  | CHN2      | 7 | 29519196 | 6 | 0.597383 |
| rs1059182  | CHN2      | 7 | 29519196 | 3 | 0.758776 |
| rs1059182  | CHN2      | 7 | 29519196 | 4 | 2.888075 |

|               |           |   |          |   |          |
|---------------|-----------|---|----------|---|----------|
| rs12611       | CHN2      | 7 | 29519302 | 3 | 0.330802 |
| rs1059185     | CHN2      | 7 | 29519508 | 7 | 1.661983 |
| rs1059185     | CHN2      | 7 | 29519508 | 5 | 3.133101 |
| rs1059185     | CHN2      | 7 | 29519508 | 3 | 0.186079 |
| rs1059185     | CHN2      | 7 | 29519508 | 1 | 4.156144 |
| rs1059185     | CHN2      | 7 | 29519508 | 4 | 3.54949  |
| rs1558634     | CHN2      | 7 | 29519864 | 6 | 0.725562 |
| rs1558634     | CHN2      | 7 | 29519864 | 2 | 5.218897 |
| rs1558634     | CHN2      | 7 | 29519864 | 4 | 0.657538 |
| rs1558634     | CHN2      | 7 | 29519864 | 7 | 1.090331 |
| rs1558634     | CHN2      | 7 | 29519864 | 3 | 0.313249 |
| rs11536448    | CHN2      | 7 | 29520158 | 7 | 1.900293 |
| SNP7-29572813 | PRR15     | 7 | 29572813 | 2 | 5.829196 |
| SNP7-29572813 | PRR15     | 7 | 29572813 | 4 | 0.568462 |
| SNP7-29572813 | PRR15     | 7 | 29572813 | 6 | 5.788099 |
| SNP7-29572813 | PRR15     | 7 | 29572813 | 7 | 0.057701 |
| rs1728643     | LOC646762 | 7 | 29655440 | 3 | 3.325178 |
| rs1728643     | LOC646762 | 7 | 29655440 | 4 | 3.662609 |
| rs4722959     | WIPF3     | 7 | 29910587 | 3 | 0.024326 |
| rs4722959     | WIPF3     | 7 | 29910587 | 1 | 0.788008 |
| rs4722959     | WIPF3     | 7 | 29910587 | 2 | 0.138171 |
| rs10231810    | WIPF3     | 7 | 29911451 | 1 | 0.131566 |
| rs10231810    | WIPF3     | 7 | 29911451 | 2 | 0.552948 |
| rs10231810    | WIPF3     | 7 | 29911451 | 3 | 0.117299 |
| rs12532093    | WIPF3     | 7 | 29911807 | 3 | 0.13348  |
| rs12532093    | WIPF3     | 7 | 29911807 | 1 | 4.031376 |
| rs10264876    | WIPF3     | 7 | 29912122 | 1 | 2.672469 |
| rs10264876    | WIPF3     | 7 | 29912122 | 2 | 2.228565 |
| rs10264876    | WIPF3     | 7 | 29912122 | 3 | 3.020909 |
| rs1049394     | SCRN1     | 7 | 29927329 | 7 | 0.536624 |
| rs1049394     | SCRN1     | 7 | 29927329 | 4 | 0.209831 |
| rs1049394     | SCRN1     | 7 | 29927329 | 3 | 0.329388 |
| rs1049394     | SCRN1     | 7 | 29927329 | 1 | 1.56743  |
| rs2269977     | SCRN1     | 7 | 29928409 | 2 | 3.004192 |
| rs2269977     | SCRN1     | 7 | 29928409 | 1 | 0.246408 |
| rs2269977     | SCRN1     | 7 | 29928409 | 3 | 0.610344 |
| rs2269977     | SCRN1     | 7 | 29928409 | 4 | 0.166645 |
| rs6976789     | SCRN1     | 7 | 29929459 | 1 | 0.018746 |
| rs6976789     | SCRN1     | 7 | 29929459 | 2 | 4.331549 |
| rs6976789     | SCRN1     | 7 | 29929459 | 7 | 0.476454 |
| rs6976789     | SCRN1     | 7 | 29929459 | 4 | 6.487296 |
| rs6976789     | SCRN1     | 7 | 29929459 | 3 | 0.161006 |
| rs17158486    | SCRN1     | 7 | 29929691 | 7 | 0.021265 |
| rs35960711    | SCRN1     | 7 | 29946996 | 7 | 0.016644 |
| rs17150692    | FKBP14    | 7 | 30032485 | 7 | 1.197697 |
| rs3750089     | C7orf41   | 7 | 30167124 | 4 | 1.205765 |
| rs3750089     | C7orf41   | 7 | 30167124 | 2 | 0.678138 |



|               |           |   |          |   |          |
|---------------|-----------|---|----------|---|----------|
| rs3750089     | C7orf41   | 7 | 30167124 | 1 | 1.230704 |
| rs3750089     | C7orf41   | 7 | 30167124 | 3 | 1.049256 |
| rs2110394     | C7orf41   | 7 | 30167938 | 1 | 1.003997 |
| rs11156       | C7orf41   | 7 | 30168188 | 5 | 0.718715 |
| rs5743372     | NOD1      | 7 | 30431560 | 1 | 4.765449 |
| rs2075821     | NOD1      | 7 | 30457836 | 6 | 3.19734  |
| rs2075821     | NOD1      | 7 | 30457836 | 7 | 0.581473 |
| rs2075820     | NOD1      | 7 | 30458762 | 7 | 0.885122 |
| rs2075820     | NOD1      | 7 | 30458762 | 8 | 3.922522 |
| rs2075818     | NOD1      | 7 | 30462907 | 6 | 6.298355 |
| rs2075818     | NOD1      | 7 | 30462907 | 8 | 8.767023 |
| rs2075818     | NOD1      | 7 | 30462907 | 7 | 5.528558 |
| rs5743335     | NOD1      | 7 | 30465354 | 5 | 0.388403 |
| rs2906766     | NOD1      | 7 | 30466100 | 8 | 0.2973   |
| rs2906766     | NOD1      | 7 | 30466100 | 7 | 4.997815 |
| rs2906766     | NOD1      | 7 | 30466100 | 6 | 4.954868 |
| rs2906766     | NOD1      | 7 | 30466100 | 5 | 0.44897  |
| rs2302340     | INMT      | 7 | 30761856 | 7 | 1.512421 |
| SNP7-30846938 | FLJ22374  | 7 | 30846938 | 3 | 0.421132 |
| rs28362739    | AQP1      | 7 | 30929834 | 1 | 1.298018 |
| rs11537660    | AQP1      | 7 | 30930294 | 1 | 0.503375 |
| rs11537660    | AQP1      | 7 | 30930294 | 2 | 0.300252 |
| rs1049305     | AQP1      | 7 | 30930347 | 5 | 0.65018  |
| rs11537661    | AQP1      | 7 | 30930670 | 1 | 5.114705 |
| rs7811042     | CCDC129   | 7 | 31559258 | 6 | 0.658951 |
| rs7811042     | CCDC129   | 7 | 31559258 | 2 | 1.833308 |
| rs2286711     | CCDC129   | 7 | 31561033 | 6 | 4.52036  |
| rs2286711     | CCDC129   | 7 | 31561033 | 5 | 3.769848 |
| rs2286711     | CCDC129   | 7 | 31561033 | 2 | 3.100758 |
| rs2159513     | CCDC129   | 7 | 31659495 | 4 | 1.288498 |
| rs2159513     | CCDC129   | 7 | 31659495 | 8 | 2.14866  |
| rs12669290    | C7orf16   | 7 | 31713774 | 3 | 0.145681 |
| rs34185       | C7orf16   | 7 | 31714559 | 3 | 0.939744 |
| rs3213709     | PDE1C     | 7 | 31815231 | 8 | 1.555089 |
| rs3213709     | PDE1C     | 7 | 31815231 | 4 | 1.024243 |
| rs3213709     | PDE1C     | 7 | 31815231 | 1 | 4.157212 |
| rs3213709     | PDE1C     | 7 | 31815231 | 7 | 0.203122 |
| rs17362028    | LOC442525 | 7 | 32478326 | 4 | 0.662049 |
| rs17362028    | LOC442525 | 7 | 32478326 | 5 | 2.250062 |
| rs17362028    | LOC442525 | 7 | 32478326 | 1 | 0.537847 |
| rs17362028    | LOC442525 | 7 | 32478326 | 3 | 0.631072 |
| rs1993050     | KIAA0241  | 7 | 32579545 | 5 | 0.123617 |
| rs11769075    | LOC401321 | 7 | 32768292 | 4 | 0.881832 |
| rs11769075    | LOC401321 | 7 | 32768292 | 5 | 0.245532 |
| rs11769075    | LOC401321 | 7 | 32768292 | 1 | 5.299108 |
| rs1045530     | KBTBD2    | 7 | 32874660 | 2 | 0.300696 |
| rs1045530     | KBTBD2    | 7 | 32874660 | 1 | 0.595826 |

|               |           |   |          |   |          |
|---------------|-----------|---|----------|---|----------|
| rs1127607     | FKBP9     | 7 | 33012569 | 6 | 1.208845 |
| rs3750117     | NT5C3     | 7 | 33027471 | 7 | 1.78613  |
| rs3750117     | NT5C3     | 7 | 33027471 | 4 | 0.00056  |
| rs3750117     | NT5C3     | 7 | 33027471 | 5 | 4.949297 |
| rs3750117     | NT5C3     | 7 | 33027471 | 1 | 6.289138 |
| rs6968741     | BMPER     | 7 | 34159287 | 7 | 0.817997 |
| rs11972404    | BMPER     | 7 | 34160114 | 8 | 2.916774 |
| rs887020      | NPSR1     | 7 | 34664507 | 5 | 1.325665 |
| rs17170011    | NPSR1     | 7 | 34833707 | 1 | 0.877815 |
| rs6972158     | NPSR1     | 7 | 34855707 | 1 | 2.298786 |
| rs6972158     | NPSR1     | 7 | 34855707 | 7 | 0.272326 |
| rs6972158     | NPSR1     | 7 | 34855707 | 8 | 2.428493 |
| rs10275028    | NPSR1     | 7 | 34855747 | 8 | 1.829244 |
| rs1127886     | DPY19L1   | 7 | 34935023 | 4 | 0.494296 |
| rs1127886     | DPY19L1   | 7 | 34935023 | 6 | 1.083307 |
| rs1127886     | DPY19L1   | 7 | 34935023 | 8 | 1.097078 |
| rs1127886     | DPY19L1   | 7 | 34935023 | 5 | 0.163629 |
| rs1127886     | DPY19L1   | 7 | 34935023 | 7 | 6.577879 |
| rs1127886     | DPY19L1   | 7 | 34935023 | 2 | 2.070484 |
| rs3779234     | HERPUD2   | 7 | 35676367 | 6 | 1.045517 |
| rs3779234     | HERPUD2   | 7 | 35676367 | 3 | 1.00438  |
| rs3779234     | HERPUD2   | 7 | 35676367 | 1 | 3.898648 |
| rs3779234     | HERPUD2   | 7 | 35676367 | 4 | 0.76014  |
| rs3801339     | LOC646913 | 7 | 35914335 | 4 | 0.747618 |
| rs3801339     | LOC646913 | 7 | 35914335 | 1 | 4.949293 |
| rs3801339     | LOC646913 | 7 | 35914335 | 8 | 0.707715 |
| rs3801339     | LOC646913 | 7 | 35914335 | 5 | 0.642069 |
| rs3801339     | LOC646913 | 7 | 35914335 | 7 | 1.404837 |
| rs2241142     | EEPD1     | 7 | 36305492 | 5 | 0.207183 |
| rs13224904    | EEPD1     | 7 | 36306155 | 8 | 4.788596 |
| rs13224904    | EEPD1     | 7 | 36306155 | 4 | 0.58996  |
| rs13224904    | EEPD1     | 7 | 36306155 | 6 | 0.438891 |
| rs13224824    | EEPD1     | 7 | 36306249 | 4 | 0.485451 |
| rs13224824    | EEPD1     | 7 | 36306249 | 8 | 0.409203 |
| rs13224824    | EEPD1     | 7 | 36306249 | 6 | 0.262907 |
| rs13224824    | EEPD1     | 7 | 36306249 | 7 | 1.012411 |
| rs196618      | EEPD1     | 7 | 36306659 | 6 | 3.425458 |
| rs196619      | EEPD1     | 7 | 36306833 | 6 | 0.693468 |
| rs196620      | EEPD1     | 7 | 36306878 | 6 | 4.180441 |
| rs196621      | EEPD1     | 7 | 36306949 | 2 | 4.401413 |
| SNP7-36413880 | ANLN      | 7 | 36413880 | 1 | 4.33164  |
| SNP7-36413880 | ANLN      | 7 | 36413880 | 4 | 0.130258 |
| rs2052197     | ANLN      | 7 | 36458737 | 5 | 7.301497 |
| rs3735386     | AOAH      | 7 | 36622560 | 8 | 4.106454 |
| rs3735386     | AOAH      | 7 | 36622560 | 3 | 0.5228   |
| rs3735386     | AOAH      | 7 | 36622560 | 6 | 3.852365 |
| rs11976480    | AOAH      | 7 | 36730197 | 4 | 0.593661 |

|               |           |   |          |   |          |
|---------------|-----------|---|----------|---|----------|
| rs11976480    | AOAH      | 7 | 36730197 | 1 | 0.815652 |
| rs2228411     | AOAH      | 7 | 36730213 | 8 | 0.19983  |
| rs2717968     | ELMO1     | 7 | 37265325 | 3 | 0.25096  |
| rs2598116     | SFRP4     | 7 | 37912873 | 5 | 0.976746 |
| rs17236975    | SFRP4     | 7 | 37913483 | 7 | 1.728027 |
| rs1802074     | SFRP4     | 7 | 37913628 | 5 | 0.176097 |
| rs2072505     | AMPH      | 7 | 38390564 | 8 | 0.186585 |
| rs2072505     | AMPH      | 7 | 38390564 | 4 | 1.166235 |
| rs2072505     | AMPH      | 7 | 38390564 | 1 | 0.987866 |
| rs1058656     | AMPH      | 7 | 38397961 | 1 | 0.1239   |
| rs2392591     | KRT8P20   | 7 | 38661735 | 3 | 1.934578 |
| rs10226586    | KRT8P20   | 7 | 38662109 | 2 | 0.469819 |
| rs17416951    | LOC340286 | 7 | 38691682 | 1 | 1.755045 |
| rs17416951    | LOC340286 | 7 | 38691682 | 3 | 0.051835 |
| rs11980087    | LOC340286 | 7 | 38692329 | 5 | 0.890661 |
| rs11980087    | LOC340286 | 7 | 38692329 | 7 | 0.558544 |
| rs11980087    | LOC340286 | 7 | 38692329 | 1 | 1.283822 |
| rs17508140    | LOC340286 | 7 | 38692998 | 2 | 1.944678 |
| rs17508140    | LOC340286 | 7 | 38692998 | 3 | 3.284617 |
| rs17508140    | LOC340286 | 7 | 38692998 | 1 | 2.928019 |
| rs2302123     | POU6F2    | 7 | 39439233 | 2 | 1.104422 |
| rs2302123     | POU6F2    | 7 | 39439233 | 1 | 1.346033 |
| rs2302122     | POU6F2    | 7 | 39439371 | 2 | 3.652437 |
| rs2010706     | C7orf10   | 7 | 40866492 | 6 | 4.477498 |
| rs2010706     | C7orf10   | 7 | 40866492 | 2 | 7.249023 |
| rs2010706     | C7orf10   | 7 | 40866492 | 5 | 4.566656 |
| rs2010706     | C7orf10   | 7 | 40866492 | 4 | 6.018072 |
| rs929387      | GLI3      | 7 | 41972203 | 7 | 1.461043 |
| rs929387      | GLI3      | 7 | 41972203 | 1 | 2.015623 |
| rs2304327     | HECW1     | 7 | 43485862 | 1 | 0.734757 |
| rs6977217     | LOC442673 | 7 | 43925034 | 6 | 2.211055 |
| rs6977217     | LOC442673 | 7 | 43925034 | 1 | 2.699249 |
| rs6977217     | LOC442673 | 7 | 43925034 | 5 | 5.412856 |
| GA024458      | DBNL      | 7 | 44066189 | 3 | 0.331563 |
| GA024458      | DBNL      | 7 | 44066189 | 8 | 0.206677 |
| rs7779139     | POLM      | 7 | 44079219 | 1 | 4.971167 |
| rs7779139     | POLM      | 7 | 44079219 | 8 | 4.064433 |
| rs7779139     | POLM      | 7 | 44079219 | 4 | 0.359218 |
| rs3218660     | POLM      | 7 | 44079398 | 3 | 0.037916 |
| rs3218660     | POLM      | 7 | 44079398 | 8 | 4.208399 |
| rs3218660     | POLM      | 7 | 44079398 | 4 | 0.781089 |
| SNP7-44114010 | AEBP1     | 7 | 44114010 | 5 | 4.217839 |
| SNP7-44114010 | AEBP1     | 7 | 44114010 | 8 | 2.283648 |
| SNP7-44114010 | AEBP1     | 7 | 44114010 | 7 | 2.832775 |
| rs2595701     | AEBP1     | 7 | 44115078 | 5 | 1.953173 |
| rs2595701     | AEBP1     | 7 | 44115078 | 8 | 1.827941 |
| rs3217972     | AEBP1     | 7 | 44120393 | 5 | 2.524892 |

|               |        |   |          |   |          |
|---------------|--------|---|----------|---|----------|
| SNP7-44218718 | YKT6   | 7 | 44218718 | 2 | 3.468978 |
| SNP7-44218718 | YKT6   | 7 | 44218718 | 5 | 5.427623 |
| rs1127065     | CAMK2B | 7 | 44226396 | 5 | 1.958207 |
| rs1043084     | NUDCD3 | 7 | 44390778 | 3 | 0.726457 |
| rs11550029    | NUDCD3 | 7 | 44410647 | 3 | 0.328486 |
| rs11550029    | NUDCD3 | 7 | 44410647 | 8 | 0.362822 |
| SNP7-44496718 | NUDCD3 | 7 | 44496718 | 3 | 0.051767 |
| SNP7-44496718 | NUDCD3 | 7 | 44496718 | 8 | 4.491569 |
| rs3187907     | NPC1L1 | 7 | 44518734 | 3 | 0.086462 |
| SNP7-44577760 | DDX56  | 7 | 44577760 | 6 | 0.911035 |
| rs8580        | TMED4  | 7 | 44587361 | 5 | 0.777369 |
| rs8580        | TMED4  | 7 | 44587361 | 2 | 5.925126 |
| rs17551563    | OGDH   | 7 | 44612710 | 8 | 0.397876 |
| rs2070607     | OGDH   | 7 | 44714103 | 8 | 0.207765 |
| rs1297837     | H2AFV  | 7 | 44836062 | 1 | 4.195498 |
| rs1297837     | H2AFV  | 7 | 44836062 | 8 | 1.244023 |
| rs13221185    | PURB   | 7 | 44887232 | 7 | 0.323167 |
| rs13221185    | PURB   | 7 | 44887232 | 1 | 5.286296 |
| rs13221185    | PURB   | 7 | 44887232 | 3 | 0.019066 |
| rs13221185    | PURB   | 7 | 44887232 | 4 | 0.308658 |
| rs11555636    | MYO1G  | 7 | 44976248 | 3 | 0.177878 |
| SNP7-44983146 | MYO1G  | 7 | 44983146 | 1 | 1.366909 |
| SNP7-44983146 | MYO1G  | 7 | 44983146 | 3 | 0.356901 |
| rs1294962     | CCM2   | 7 | 45033542 | 1 | 3.155327 |
| rs2289365     | CCM2   | 7 | 45033792 | 4 | 1.027555 |
| rs2289365     | CCM2   | 7 | 45033792 | 6 | 1.164157 |
| rs3735493     | NACAD  | 7 | 45088849 | 1 | 0.608554 |
| rs3735494     | NACAD  | 7 | 45090811 | 1 | 0.123064 |
| rs3735494     | NACAD  | 7 | 45090811 | 4 | 0.649007 |
| rs3735495     | NACAD  | 7 | 45090990 | 4 | 0.009656 |
| rs3735495     | NACAD  | 7 | 45090990 | 1 | 0.464794 |
| rs4553        | TBRG4  | 7 | 45106417 | 6 | 1.076538 |
| rs4553        | TBRG4  | 7 | 45106417 | 1 | 3.650377 |
| rs12702121    | RAMP3  | 7 | 45189784 | 4 | 1.404406 |
| rs3735669     | ADCY1  | 7 | 45721107 | 3 | 0.766831 |
| rs3735669     | ADCY1  | 7 | 45721107 | 7 | 0.29174  |
| rs2280496     | ADCY1  | 7 | 45723522 | 5 | 2.435908 |
| rs2280496     | ADCY1  | 7 | 45723522 | 1 | 2.612817 |
| rs2280496     | ADCY1  | 7 | 45723522 | 6 | 1.137743 |
| rs2280496     | ADCY1  | 7 | 45723522 | 7 | 0.616329 |
| rs2280495     | ADCY1  | 7 | 45723868 | 7 | 0.055841 |
| rs2461127     | ADCY1  | 7 | 45724331 | 3 | 0.184141 |
| rs2461127     | ADCY1  | 7 | 45724331 | 1 | 1.161705 |
| rs2471267     | ADCY1  | 7 | 45725787 | 5 | 0.683868 |
| rs2471267     | ADCY1  | 7 | 45725787 | 8 | 0.584609 |
| rs12754       | ADCY1  | 7 | 45727719 | 4 | 0.416776 |
| rs3735666     | ADCY1  | 7 | 45728477 | 4 | 0.601138 |

|               |         |   |          |   |          |
|---------------|---------|---|----------|---|----------|
| rs2960287     | 13-Sep  | 7 | 45731759 | 8 | 2.031336 |
| rs2960287     | 13-Sep  | 7 | 45731759 | 1 | 5.249123 |
| rs2960287     | 13-Sep  | 7 | 45731759 | 4 | 3.953172 |
| rs2960287     | 13-Sep  | 7 | 45731759 | 3 | 1.383509 |
| rs2960287     | 13-Sep  | 7 | 45731759 | 5 | 0.389076 |
| rs2960287     | 13-Sep  | 7 | 45731759 | 6 | 0.592029 |
| rs4988515     | IGFBP1  | 7 | 45899125 | 3 | 0.181248 |
| rs4619        | IGFBP1  | 7 | 45899194 | 3 | 0.187813 |
| rs7454        | IGFBP1  | 7 | 45899531 | 3 | 0.354004 |
| rs3210894     | TNS3    | 7 | 47283849 | 6 | 5.399072 |
| rs3210894     | TNS3    | 7 | 47283849 | 1 | 5.218282 |
| rs3750164     | TNS3    | 7 | 47289981 | 5 | 0.240049 |
| rs3750164     | TNS3    | 7 | 47289981 | 6 | 0.42213  |
| rs3750164     | TNS3    | 7 | 47289981 | 3 | 0.684265 |
| rs3750164     | TNS3    | 7 | 47289981 | 4 | 3.910168 |
| rs11763044    | TNS3    | 7 | 47448127 | 5 | 0.531222 |
| rs11763044    | TNS3    | 7 | 47448127 | 2 | 1.592542 |
| rs11763044    | TNS3    | 7 | 47448127 | 1 | 0.222254 |
| rs10261525    | TNS3    | 7 | 47535243 | 5 | 0.586843 |
| rs17545279    | PKD1L1  | 7 | 47781054 | 8 | 1.908734 |
| rs13231277    | PKD1L1  | 7 | 47806912 | 5 | 0.149028 |
| rs13231277    | PKD1L1  | 7 | 47806912 | 4 | 0.232301 |
| rs13231277    | PKD1L1  | 7 | 47806912 | 7 | 0.937031 |
| rs13231277    | PKD1L1  | 7 | 47806912 | 8 | 3.119232 |
| rs2290386     | PKD1L1  | 7 | 47819362 | 8 | 6.014062 |
| SNP7-47880085 | PKD1L1  | 7 | 47880085 | 4 | 1.228881 |
| rs1470859     | PKD1L1  | 7 | 47880104 | 7 | 1.902738 |
| SNP7-47883612 | PKD1L1  | 7 | 47883612 | 3 | 2.201937 |
| rs2686817     | PKD1L1  | 7 | 47935452 | 6 | 5.04014  |
| rs2686817     | PKD1L1  | 7 | 47935452 | 4 | 0.894264 |
| rs2686817     | PKD1L1  | 7 | 47935452 | 5 | 0.149266 |
| rs2686817     | PKD1L1  | 7 | 47935452 | 3 | 1.142153 |
| rs885337      | PKD1L1  | 7 | 47938100 | 4 | 4.081726 |
| rs885337      | PKD1L1  | 7 | 47938100 | 3 | 0.468356 |
| rs885337      | PKD1L1  | 7 | 47938100 | 5 | 0.333427 |
| rs885337      | PKD1L1  | 7 | 47938100 | 1 | 0.463446 |
| rs885337      | PKD1L1  | 7 | 47938100 | 6 | 1.019044 |
| rs885338      | PKD1L1  | 7 | 47938151 | 2 | 3.456464 |
| rs885338      | PKD1L1  | 7 | 47938151 | 7 | 1.190529 |
| rs10951942    | C7orf57 | 7 | 48047620 | 7 | 1.472944 |
| rs10951942    | C7orf57 | 7 | 48047620 | 6 | 5.998804 |
| rs10951942    | C7orf57 | 7 | 48047620 | 8 | 0.468671 |
| rs10951942    | C7orf57 | 7 | 48047620 | 3 | 1.060616 |
| rs10951942    | C7orf57 | 7 | 48047620 | 1 | 3.499505 |
| rs2708912     | C7orf57 | 7 | 48052602 | 7 | 1.09128  |
| rs7790252     | C7orf57 | 7 | 48066541 | 3 | 1.566464 |
| rs7790252     | C7orf57 | 7 | 48066541 | 7 | 0.392729 |

|               |               |   |          |   |          |
|---------------|---------------|---|----------|---|----------|
| rs7790252     | C7orf57       | 7 | 48066541 | 6 | 1.922934 |
| rs7790252     | C7orf57       | 7 | 48066541 | 8 | 1.1032   |
| rs7790252     | C7orf57       | 7 | 48066541 | 1 | 2.775683 |
| SNP7-48256031 | ABCA13        | 7 | 48256031 | 1 | 4.488971 |
| SNP7-48256031 | ABCA13        | 7 | 48256031 | 5 | 0.976077 |
| SNP7-48256031 | ABCA13        | 7 | 48256031 | 8 | 1.403258 |
| rs17547816    | ABCA13        | 7 | 48282204 | 1 | 5.176631 |
| rs17547816    | ABCA13        | 7 | 48282204 | 7 | 1.551925 |
| SNP7-48282630 | ABCA13        | 7 | 48282630 | 5 | 1.967702 |
| rs1358066     | ABCA13        | 7 | 48283220 | 5 | 1.449426 |
| rs1358066     | ABCA13        | 7 | 48283220 | 6 | 1.117712 |
| rs1358066     | ABCA13        | 7 | 48283220 | 1 | 4.319739 |
| rs17547830    | ABCA13        | 7 | 48284056 | 6 | 1.69082  |
| rs17547830    | ABCA13        | 7 | 48284056 | 5 | 0.526795 |
| rs6583483     | ABCA13        | 7 | 48284495 | 1 | 4.673111 |
| rs6955212     | ABCA13        | 7 | 48284825 | 1 | 4.449279 |
| rs1880736     | ABCA13        | 7 | 48286342 | 5 | 1.790793 |
| rs1880736     | ABCA13        | 7 | 48286342 | 6 | 1.144147 |
| rs6583546     | ABCA13        | 7 | 48307390 | 6 | 0.690176 |
| rs6583546     | ABCA13        | 7 | 48307390 | 5 | 4.040816 |
| rs3931814     | ABCA13        | 7 | 48320193 | 5 | 2.48502  |
| rs17548783    | ABCA13        | 7 | 48420703 | 4 | 0.814966 |
| rs17548783    | ABCA13        | 7 | 48420703 | 3 | 1.743146 |
| rs17548783    | ABCA13        | 7 | 48420703 | 7 | 0.658787 |
| rs6955686     | ABCA13        | 7 | 48657146 | 5 | 0.459749 |
| rs6955686     | ABCA13        | 7 | 48657146 | 3 | 1.320654 |
| SNP7-49812923 | VWC2          | 7 | 49812923 | 1 | 0.818117 |
| rs11980379    | IKZF1         | 7 | 50437475 | 1 | 1.401444 |
| rs801142      | COBL          | 7 | 51254964 | 6 | 6.329767 |
| rs801142      | COBL          | 7 | 51254964 | 1 | 5.741871 |
| rs11238247    | DKFZp564N2472 | 7 | 53071048 | 3 | 0.991001 |
| rs11238247    | DKFZp564N2472 | 7 | 53071048 | 7 | 0.686213 |
| rs11238247    | DKFZp564N2472 | 7 | 53071048 | 5 | 1.064605 |
| rs11238248    | DKFZp564N2472 | 7 | 53071065 | 3 | 0.25651  |
| rs1184320     | DKFZp564N2472 | 7 | 53071167 | 5 | 2.606963 |
| rs1184320     | DKFZp564N2472 | 7 | 53071167 | 8 | 1.823024 |
| rs1184320     | DKFZp564N2472 | 7 | 53071167 | 7 | 1.269143 |
| rs3862849     | VSTM2A        | 7 | 54586113 | 7 | 0.784641 |
| rs3862849     | VSTM2A        | 7 | 54586113 | 4 | 0.020344 |
| rs3862849     | VSTM2A        | 7 | 54586113 | 6 | 0.043315 |
| rs2709289     | SEC61G        | 7 | 54794422 | 2 | 5.461121 |
| rs2709289     | SEC61G        | 7 | 54794422 | 3 | 0.517717 |
| rs10228436    | EGFR          | 7 | 55205762 | 1 | 0.179562 |
| rs10228436    | EGFR          | 7 | 55205762 | 4 | 0.527115 |
| rs10228436    | EGFR          | 7 | 55205762 | 6 | 5.096331 |
| rs10228436    | EGFR          | 7 | 55205762 | 7 | 0.783917 |
| rs2293347     | EGFR          | 7 | 55236410 | 1 | 4.712089 |

|               |           |   |          |   |          |
|---------------|-----------|---|----------|---|----------|
| rs1267        | LANCL2    | 7 | 55468742 | 1 | 0.432526 |
| rs1267        | LANCL2    | 7 | 55468742 | 8 | 3.404896 |
| rs1267        | LANCL2    | 7 | 55468742 | 2 | 0.391785 |
| rs1267        | LANCL2    | 7 | 55468742 | 3 | 0.11985  |
| rs10239854    | LOC442308 | 7 | 55681776 | 1 | 1.91727  |
| rs10239854    | LOC442308 | 7 | 55681776 | 8 | 0.979474 |
| rs10239854    | LOC442308 | 7 | 55681776 | 6 | 1.545064 |
| rs10239854    | LOC442308 | 7 | 55681776 | 5 | 2.854319 |
| rs10239854    | LOC442308 | 7 | 55681776 | 4 | 2.042529 |
| rs11238393    | PHKG1     | 7 | 56116856 | 3 | 0.983018 |
| rs11238393    | PHKG1     | 7 | 56116856 | 5 | 0.354022 |
| rs11238393    | PHKG1     | 7 | 56116856 | 8 | 0.599834 |
| rs11238393    | PHKG1     | 7 | 56116856 | 7 | 0.559022 |
| rs13238521    | PHKG1     | 7 | 56117433 | 4 | 0.329521 |
| rs9642239     | LOC441233 | 7 | 57474574 | 3 | 0.336954 |
| rs13229184    | LOC441233 | 7 | 57475757 | 3 | 1.376704 |
| SNP7-63804237 | ZNF107    | 7 | 63804237 | 6 | 0.305959 |
| rs7804955     | LOC168474 | 7 | 63950142 | 5 | 1.187933 |
| rs2017252     | ZNF273    | 7 | 64026524 | 2 | 5.466488 |
| rs2017252     | ZNF273    | 7 | 64026524 | 5 | 0.417174 |
| rs2017252     | ZNF273    | 7 | 64026524 | 7 | 0.948944 |
| rs3807068     | NULL      | 7 | 64077048 | 7 | 1.613942 |
| rs3807068     | NULL      | 7 | 64077048 | 8 | 1.398038 |
| rs3815684     | LOC285908 | 7 | 65480430 | 7 | 0.968429 |
| rs6950137     | LOC641765 | 7 | 65614045 | 2 | 2.493987 |
| rs6950137     | LOC641765 | 7 | 65614045 | 1 | 1.781034 |
| rs6950137     | LOC641765 | 7 | 65614045 | 5 | 1.45965  |
| rs4718382     | KCTD7     | 7 | 65742344 | 7 | 0.984374 |
| rs9791713     | KCTD7     | 7 | 65742633 | 5 | 3.554128 |
| rs41303396    | TYW1      | 7 | 66101373 | 4 | 0.532417 |
| rs7776775     | TYW1      | 7 | 66285634 | 6 | 0.092833 |
| rs7776775     | TYW1      | 7 | 66285634 | 4 | 6.390532 |
| SNP7-66340763 | TYW1      | 7 | 66340763 | 4 | 2.040279 |
| SNP7-66340763 | TYW1      | 7 | 66340763 | 2 | 4.849367 |
| SNP7-66340763 | TYW1      | 7 | 66340763 | 6 | 3.625442 |
| SNP7-66411448 | STAG3L4   | 7 | 66411448 | 4 | 3.524785 |
| SNP7-66411448 | STAG3L4   | 7 | 66411448 | 1 | 5.535307 |
| SNP7-66411448 | STAG3L4   | 7 | 66411448 | 8 | 4.377141 |
| SNP7-66411448 | STAG3L4   | 7 | 66411448 | 7 | 4.161634 |
| SNP7-66411448 | STAG3L4   | 7 | 66411448 | 6 | 6.550709 |
| SNP7-66411448 | STAG3L4   | 7 | 66411448 | 2 | 3.166975 |
| SNP7-66411448 | STAG3L4   | 7 | 66411448 | 3 | 4.141852 |
| SNP7-66411448 | STAG3L4   | 7 | 66411448 | 5 | 3.610626 |
| rs887715      | STAG3L4   | 7 | 66423819 | 1 | 1.446903 |
| rs887715      | STAG3L4   | 7 | 66423819 | 6 | 1.960266 |
| rs887715      | STAG3L4   | 7 | 66423819 | 5 | 0.702013 |
| rs887715      | STAG3L4   | 7 | 66423819 | 4 | 3.451502 |

|               |          |   |          |   |          |
|---------------|----------|---|----------|---|----------|
| rs887715      | STAG3L4  | 7 | 66423819 | 8 | 1.464319 |
| rs887715      | STAG3L4  | 7 | 66423819 | 3 | 1.205482 |
| rs3735260     | AUTS2    | 7 | 68702573 | 6 | 0.390903 |
| rs13232120    | TBL2     | 7 | 72621246 | 8 | 4.401425 |
| rs13232120    | TBL2     | 7 | 72621246 | 7 | 6.767043 |
| rs13232120    | TBL2     | 7 | 72621246 | 3 | 0.64492  |
| rs1051921     | MLXIPL   | 7 | 72645879 | 7 | 0.572619 |
| rs1051921     | MLXIPL   | 7 | 72645879 | 3 | 2.473821 |
| rs1051921     | MLXIPL   | 7 | 72645879 | 5 | 0.203569 |
| rs35332062    | MLXIPL   | 7 | 72649978 | 3 | 1.950986 |
| rs35332062    | MLXIPL   | 7 | 72649978 | 7 | 1.413883 |
| rs35332062    | MLXIPL   | 7 | 72649978 | 8 | 1.270429 |
| rs1376        | WBSCR18  | 7 | 72733375 | 3 | 0.320499 |
| rs1376        | WBSCR18  | 7 | 72733375 | 4 | 0.764556 |
| rs4717803     | WBSCR18  | 7 | 72733580 | 4 | 0.226816 |
| rs4717803     | WBSCR18  | 7 | 72733580 | 3 | 0.4769   |
| rs867500      | STX1A    | 7 | 72752376 | 3 | 0.089555 |
| rs867500      | STX1A    | 7 | 72752376 | 6 | 6.656085 |
| rs867500      | STX1A    | 7 | 72752376 | 4 | 0.412872 |
| rs1569061     | STX1A    | 7 | 72752417 | 8 | 6.704192 |
| SNP7-72917595 | WBSCR28  | 7 | 72917595 | 7 | 0.897044 |
| SNP7-72917595 | WBSCR28  | 7 | 72917595 | 1 | 4.593003 |
| rs2071307     | ELN      | 7 | 73108650 | 3 | 0.776519 |
| rs2071307     | ELN      | 7 | 73108650 | 1 | 1.304436 |
| rs539518      | CLIP2    | 7 | 73391186 | 4 | 3.553226 |
| rs539518      | CLIP2    | 7 | 73391186 | 5 | 6.063241 |
| rs5874        | CLIP2    | 7 | 73457960 | 4 | 0.66783  |
| rs5874        | CLIP2    | 7 | 73457960 | 1 | 6.167865 |
| rs5874        | CLIP2    | 7 | 73457960 | 3 | 0.052574 |
| rs5874        | CLIP2    | 7 | 73457960 | 6 | 0.538304 |
| rs1167829     | HIP1     | 7 | 75002954 | 8 | 5.200008 |
| rs1167829     | HIP1     | 7 | 75002954 | 6 | 4.275013 |
| rs1167830     | HIP1     | 7 | 75004337 | 6 | 0.124319 |
| rs1167794     | HIP1     | 7 | 75010206 | 7 | 0.146908 |
| rs1167794     | HIP1     | 7 | 75010206 | 3 | 0.552714 |
| rs2302009     | CCL26    | 7 | 75236934 | 7 | 0.961212 |
| rs2302009     | CCL26    | 7 | 75236934 | 6 | 1.022881 |
| rs11465293    | CCL24    | 7 | 75280659 | 1 | 3.892218 |
| rs7223        | RHBDD2   | 7 | 75355956 | 6 | 5.462401 |
| rs8509        | TMEM120A | 7 | 75454513 | 5 | 8.739007 |
| rs8509        | TMEM120A | 7 | 75454513 | 8 | 0.032    |
| rs8565        | STYXL1   | 7 | 75468210 | 5 | 1.420968 |
| rs8565        | STYXL1   | 7 | 75468210 | 2 | 3.825587 |
| rs1044484     | STYXL1   | 7 | 75472623 | 8 | 5.868408 |
| rs1044484     | STYXL1   | 7 | 75472623 | 4 | 0.408439 |
| rs1044484     | STYXL1   | 7 | 75472623 | 3 | 0.641266 |
| rs2302435     | STYXL1   | 7 | 75514923 | 5 | 0.573368 |



|               |            |   |          |   |          |
|---------------|------------|---|----------|---|----------|
| rs2302435     | STYXL1     | 7 | 75514923 | 6 | 0.57926  |
| rs2302435     | STYXL1     | 7 | 75514923 | 7 | 1.475158 |
| rs2302435     | STYXL1     | 7 | 75514923 | 2 | 0.96006  |
| rs2302438     | STYXL1     | 7 | 75515001 | 6 | 0.542615 |
| rs2302438     | STYXL1     | 7 | 75515001 | 5 | 0.565207 |
| rs2302438     | STYXL1     | 7 | 75515001 | 8 | 4.651957 |
| rs2302438     | STYXL1     | 7 | 75515001 | 7 | 0.174677 |
| rs3178297     | MDH2       | 7 | 75533549 | 7 | 1.278187 |
| rs3178297     | MDH2       | 7 | 75533549 | 1 | 3.924181 |
| rs1046304     | YWHAG      | 7 | 75795580 | 8 | 4.270863 |
| rs12540545    | SRCRB4D    | 7 | 75876784 | 5 | 0.475197 |
| rs12540545    | SRCRB4D    | 7 | 75876784 | 6 | 1.873365 |
| rs3095481     | LOC641808  | 7 | 76589293 | 6 | 3.253959 |
| rs3095481     | LOC641808  | 7 | 76589293 | 1 | 2.448715 |
| rs3095481     | LOC641808  | 7 | 76589293 | 3 | 2.784298 |
| rs3095481     | LOC641808  | 7 | 76589293 | 2 | 3.405811 |
| rs3763402     | CCDC146    | 7 | 76754755 | 4 | 0.709649 |
| rs8124        | CCDC146    | 7 | 76762354 | 1 | 4.850927 |
| rs4727366     | tcag7.1314 | 7 | 76828114 | 8 | 5.771519 |
| rs4727366     | tcag7.1314 | 7 | 76828114 | 4 | 0.116841 |
| rs4727366     | tcag7.1314 | 7 | 76828114 | 3 | 0.254376 |
| rs1527263     | tcag7.1314 | 7 | 76829871 | 2 | 0.668026 |
| rs1527263     | tcag7.1314 | 7 | 76829871 | 3 | 0.773899 |
| rs1527263     | tcag7.1314 | 7 | 76829871 | 8 | 0.308856 |
| rs6949654     | tcag7.1314 | 7 | 76873328 | 1 | 4.209376 |
| SNP7-77103076 | PTPN12     | 7 | 77103076 | 6 | 6.451651 |
| rs1009524     | MAGI2      | 7 | 77627339 | 7 | 0.938695 |
| rs3735442     | MAGI2      | 7 | 77957045 | 7 | 1.492709 |
| rs3735442     | MAGI2      | 7 | 77957045 | 6 | 1.086005 |
| rs12721456    | GNAI1      | 7 | 79670962 | 6 | 0.497866 |
| rs10241877    | GNAI1      | 7 | 79680093 | 8 | 0.25702  |
| rs10241877    | GNAI1      | 7 | 79680093 | 1 | 3.499586 |
| rs1049654     | CD36       | 7 | 80113391 | 4 | 0.110431 |
| rs1049654     | CD36       | 7 | 80113391 | 6 | 1.010131 |
| rs5745678     | HGF        | 7 | 81209983 | 6 | 0.660895 |
| rs5745678     | HGF        | 7 | 81209983 | 4 | 3.936018 |
| rs5745678     | HGF        | 7 | 81209983 | 5 | 0.55344  |
| rs5745676     | HGF        | 7 | 81210092 | 6 | 1.428881 |
| rs5745676     | HGF        | 7 | 81210092 | 4 | 0.22561  |
| rs5745676     | HGF        | 7 | 81210092 | 5 | 0.388905 |
| rs5745646     | HGF        | 7 | 81219262 | 6 | 0.270563 |
| rs5745646     | HGF        | 7 | 81219262 | 4 | 0.231611 |
| rs5745646     | HGF        | 7 | 81219262 | 5 | 0.572431 |
| rs2040957     | SEMA3D     | 7 | 84464324 | 6 | 0.667835 |
| rs2040957     | SEMA3D     | 7 | 84464324 | 8 | 2.396622 |
| rs2040957     | SEMA3D     | 7 | 84464324 | 4 | 0.15124  |
| rs10261725    | SEMA3D     | 7 | 84465167 | 5 | 1.207529 |

|               |           |   |          |   |          |
|---------------|-----------|---|----------|---|----------|
| rs10261725    | SEMA3D    | 7 | 84465167 | 4 | 4.865515 |
| rs10261725    | SEMA3D    | 7 | 84465167 | 8 | 0.419741 |
| rs7800072     | SEMA3D    | 7 | 84466925 | 5 | 0.49619  |
| rs7800072     | SEMA3D    | 7 | 84466925 | 6 | 0.936073 |
| rs7800072     | SEMA3D    | 7 | 84466925 | 4 | 1.462091 |
| rs17559084    | SEMA3D    | 7 | 84482436 | 5 | 0.928324 |
| rs17559084    | SEMA3D    | 7 | 84482436 | 8 | 2.521306 |
| rs17559084    | SEMA3D    | 7 | 84482436 | 6 | 0.406076 |
| rs17559084    | SEMA3D    | 7 | 84482436 | 4 | 4.143591 |
| SNP7-86385770 | KIAA1324L | 7 | 86385770 | 8 | 0.639258 |
| rs2109505     | ABCB4     | 7 | 86917342 | 4 | 0.027002 |
| rs1045642     | ABCB1     | 7 | 86976581 | 4 | 0.438327 |
| rs1045642     | ABCB1     | 7 | 86976581 | 7 | 0.097533 |
| rs9655955     | SLC25A40  | 7 | 87343366 | 6 | 12.04444 |
| rs6977687     | DBF4      | 7 | 87375963 | 5 | 0.435712 |
| rs6977687     | DBF4      | 7 | 87375963 | 6 | 0.137469 |
| rs6977687     | DBF4      | 7 | 87375963 | 8 | 0.719377 |
| rs9655959     | STEAP4    | 7 | 87746324 | 1 | 5.632417 |
| SNP7-87751157 | STEAP4    | 7 | 87751157 | 1 | 5.873351 |
| SNP7-87751297 | STEAP4    | 7 | 87751297 | 6 | 0.243115 |
| SNP7-87751297 | STEAP4    | 7 | 87751297 | 2 | 4.917137 |
| SNP7-87751297 | STEAP4    | 7 | 87751297 | 5 | 1.326251 |
| SNP7-87751297 | STEAP4    | 7 | 87751297 | 8 | 3.652552 |
| rs6465147     | LOC442709 | 7 | 88106915 | 7 | 3.545416 |
| rs6465147     | LOC442709 | 7 | 88106915 | 1 | 4.240691 |
| rs6465147     | LOC442709 | 7 | 88106915 | 2 | 3.839674 |
| rs2293583     | MGC26647  | 7 | 88261817 | 3 | 0.715747 |
| rs2293583     | MGC26647  | 7 | 88261817 | 1 | 0.750603 |
| rs2293583     | MGC26647  | 7 | 88261817 | 5 | 0.015211 |
| SNP7-88801997 | ZNF804B   | 7 | 88801997 | 5 | 1.971505 |
| SNP7-88803077 | ZNF804B   | 7 | 88803077 | 4 | 2.535965 |
| rs194503      | STEAP2    | 7 | 89679020 | 1 | 0.968169 |
| rs194503      | STEAP2    | 7 | 89679020 | 6 | 1.377845 |
| rs194503      | STEAP2    | 7 | 89679020 | 5 | 0.03877  |
| rs17621350    | STEAP2    | 7 | 89699893 | 1 | 4.158265 |
| rs17621350    | STEAP2    | 7 | 89699893 | 4 | 0.803399 |
| rs17621350    | STEAP2    | 7 | 89699893 | 7 | 0.2165   |
| rs17621350    | STEAP2    | 7 | 89699893 | 8 | 1.823562 |
| rs194527      | STEAP2    | 7 | 89700620 | 6 | 1.86203  |
| rs194527      | STEAP2    | 7 | 89700620 | 5 | 2.052231 |
| rs194528      | STEAP2    | 7 | 89700934 | 7 | 7.399461 |
| rs194528      | STEAP2    | 7 | 89700934 | 6 | 1.455373 |
| rs194528      | STEAP2    | 7 | 89700934 | 5 | 1.567265 |
| rs194529      | STEAP2    | 7 | 89702249 | 1 | 5.238046 |
| rs194529      | STEAP2    | 7 | 89702249 | 6 | 2.277934 |
| rs194529      | STEAP2    | 7 | 89702249 | 7 | 4.52664  |
| rs194529      | STEAP2    | 7 | 89702249 | 5 | 1.575911 |

|               |         |   |          |   |          |
|---------------|---------|---|----------|---|----------|
| rs11563905    | GTPBP10 | 7 | 89813987 | 6 | 0.584326 |
| rs3810874     | CLDN12  | 7 | 89880793 | 3 | 0.230754 |
| rs3810874     | CLDN12  | 7 | 89880793 | 2 | 5.707782 |
| rs3810874     | CLDN12  | 7 | 89880793 | 4 | 5.679026 |
| rs11767691    | PFTK1   | 7 | 90176786 | 7 | 0.428316 |
| rs11767691    | PFTK1   | 7 | 90176786 | 4 | 0.221329 |
| rs11771034    | PFTK1   | 7 | 90675152 | 3 | 0.407702 |
| rs9008        | MTERF   | 7 | 91340343 | 5 | 0.180018 |
| rs9008        | MTERF   | 7 | 91340343 | 1 | 0.33606  |
| rs9008        | MTERF   | 7 | 91340343 | 2 | 1.190274 |
| rs10225885    | AKAP9   | 7 | 91508943 | 5 | 0.431598 |
| rs10225885    | AKAP9   | 7 | 91508943 | 8 | 0.144005 |
| SNP7-91546834 | AKAP9   | 7 | 91546834 | 4 | 1.131164 |
| SNP7-91550634 | AKAP9   | 7 | 91550634 | 2 | 3.728645 |
| SNP7-91550634 | AKAP9   | 7 | 91550634 | 5 | 0.948705 |
| rs8039        | CYP51A1 | 7 | 91580284 | 4 | 0.645351 |
| rs8039        | CYP51A1 | 7 | 91580284 | 1 | 0.13762  |
| rs8039        | CYP51A1 | 7 | 91580284 | 6 | 4.781357 |
| rs8039        | CYP51A1 | 7 | 91580284 | 7 | 4.923592 |
| rs1861635     | ANKIB1  | 7 | 91865473 | 7 | 0.177918 |
| rs1861635     | ANKIB1  | 7 | 91865473 | 1 | 4.850791 |
| SNP7-92079387 | CDK6    | 7 | 92079387 | 6 | 0.522683 |
| SNP7-92079387 | CDK6    | 7 | 92079387 | 8 | 1.148148 |
| SNP7-92079387 | CDK6    | 7 | 92079387 | 4 | 0.034666 |
| SNP7-92079387 | CDK6    | 7 | 92079387 | 3 | 0.354212 |
| rs3731389     | CDK6    | 7 | 92082129 | 3 | 0.393106 |
| rs10279499    | SAMD9   | 7 | 92571702 | 8 | 5.077597 |
| rs4267        | SAMD9L  | 7 | 92597398 | 7 | 4.182288 |
| rs1029357     | SAMD9L  | 7 | 92600617 | 7 | 0.269733 |
| rs1801197     | CALCR   | 7 | 92893689 | 3 | 0.844629 |
| rs4264        | TFPI2   | 7 | 93354013 | 7 | 0.293767 |
| rs4262        | GNG11   | 7 | 93389364 | 1 | 0.093282 |
| rs4262        | GNG11   | 7 | 93389364 | 5 | 0.111862 |
| rs4262        | GNG11   | 7 | 93389364 | 2 | 0.032253 |
| rs4262        | GNG11   | 7 | 93389364 | 4 | 0.162356 |
| rs6945362     | BET1    | 7 | 93459329 | 5 | 0.348266 |
| rs6945362     | BET1    | 7 | 93459329 | 3 | 0.607638 |
| rs6945362     | BET1    | 7 | 93459329 | 4 | 0.678939 |
| rs10953105    | BET1    | 7 | 93460183 | 3 | 0.497969 |
| rs1800248     | COL1A2  | 7 | 93894285 | 8 | 0.153394 |
| rs1800248     | COL1A2  | 7 | 93894285 | 2 | 5.910988 |
| SNP7-93895628 | COL1A2  | 7 | 93895628 | 7 | 0.332037 |
| rs1060399     | COL1A2  | 7 | 93897835 | 2 | 0.52968  |
| rs1060399     | COL1A2  | 7 | 93897835 | 4 | 0.873293 |
| rs1060399     | COL1A2  | 7 | 93897835 | 1 | 0.60322  |
| rs3750105     | PEG10   | 7 | 94132618 | 6 | 4.510785 |
| rs13073       | PEG10   | 7 | 94134705 | 3 | 4.330155 |

|               |               |   |          |   |          |
|---------------|---------------|---|----------|---|----------|
| rs13073       | PEG10         | 7 | 94134705 | 1 | 4.628872 |
| rs13073       | PEG10         | 7 | 94134705 | 4 | 0.893562 |
| rs11764692    | PPP1R9A       | 7 | 94758928 | 6 | 0.593458 |
| rs11764692    | PPP1R9A       | 7 | 94758928 | 5 | 9.258883 |
| rs3917579     | PON1          | 7 | 94765279 | 5 | 0.020928 |
| rs3735590     | PON1          | 7 | 94765431 | 5 | 0.312596 |
| rs854552      | PON1          | 7 | 94765860 | 5 | 0.706097 |
| rs854552      | PON1          | 7 | 94765860 | 2 | 2.323832 |
| rs662         | PON1          | 7 | 94775382 | 6 | 2.108514 |
| rs662         | PON1          | 7 | 94775382 | 5 | 0.292088 |
| rs662         | PON1          | 7 | 94775382 | 7 | 2.67372  |
| rs854560      | PON1          | 7 | 94784020 | 2 | 2.104072 |
| rs13226149    | PON3          | 7 | 94863536 | 7 | 1.099773 |
| rs6931        | PDK4          | 7 | 95050838 | 5 | 0.137655 |
| rs7802814     | PDK4          | 7 | 95051547 | 7 | 0.799225 |
| rs11765552    | LMTK2         | 7 | 97660051 | 4 | 0.070429 |
| SNP7-97684976 | DKFZP434B0335 | 7 | 97684976 | 6 | 0.186013 |
| SNP7-97684976 | DKFZP434B0335 | 7 | 97684976 | 5 | 0.869437 |
| SNP7-97690335 | DKFZP434B0335 | 7 | 97690335 | 6 | 0.880985 |
| SNP7-97690335 | DKFZP434B0335 | 7 | 97690335 | 5 | 0.79186  |
| rs2291745     | DKFZP434B0335 | 7 | 97692329 | 4 | 0.055764 |
| rs2291745     | DKFZP434B0335 | 7 | 97692329 | 8 | 0.539147 |
| rs2291745     | DKFZP434B0335 | 7 | 97692329 | 6 | 4.165748 |
| rs2291750     | DKFZP434B0335 | 7 | 97701081 | 4 | 2.658176 |
| rs2291750     | DKFZP434B0335 | 7 | 97701081 | 8 | 4.111794 |
| rs1874344     | DKFZP434B0335 | 7 | 97711930 | 4 | 0.285431 |
| rs1874344     | DKFZP434B0335 | 7 | 97711930 | 6 | 5.410513 |
| rs1874344     | DKFZP434B0335 | 7 | 97711930 | 5 | 2.99541  |
| rs7015        | BRI3          | 7 | 97758559 | 8 | 7.217212 |
| SNP7-97868313 | BAIAP2L1      | 7 | 97868313 | 4 | 2.938746 |
| SNP7-97868313 | BAIAP2L1      | 7 | 97868313 | 6 | 6.856754 |
| SNP7-97868313 | BAIAP2L1      | 7 | 97868313 | 8 | 0.330992 |
| SNP7-97868313 | BAIAP2L1      | 7 | 97868313 | 2 | 4.836893 |
| rs219815      | TRRAP         | 7 | 98448620 | 4 | 0.261734 |
| rs1007008     | NULL          | 7 | 98464472 | 4 | 4.142021 |
| rs219797      | SMURF1        | 7 | 98487987 | 5 | 0.025334 |
| rs219797      | SMURF1        | 7 | 98487987 | 7 | 0.825521 |
| rs219797      | SMURF1        | 7 | 98487987 | 3 | 0.564607 |
| rs219797      | SMURF1        | 7 | 98487987 | 4 | 0.267784 |
| rs1045012     | ARPC1B        | 7 | 98822290 | 4 | 0.210132 |
| rs3177186     | ARPC1B        | 7 | 98822335 | 2 | 4.274952 |
| rs17854665    | CPSF4         | 7 | 98887975 | 4 | 3.517466 |
| rs17854665    | CPSF4         | 7 | 98887975 | 6 | 3.098537 |
| rs6947974     | ZNF655        | 7 | 98994442 | 2 | 5.247143 |
| rs952319      | ZNF655        | 7 | 99009385 | 1 | 0.605319 |
| rs952319      | ZNF655        | 7 | 99009385 | 4 | 5.4576   |
| rs952319      | ZNF655        | 7 | 99009385 | 2 | 0.702064 |

|            |         |   |          |   |          |
|------------|---------|---|----------|---|----------|
| rs952319   | ZNF655  | 7 | 99009385 | 6 | 1.2635   |
| rs10282706 | ZNF498  | 7 | 99055360 | 1 | 4.651949 |
| rs10282706 | ZNF498  | 7 | 99055360 | 4 | 0.897585 |
| rs10282706 | ZNF498  | 7 | 99055360 | 6 | 0.412681 |
| rs1859690  | ZNF498  | 7 | 99065108 | 4 | 0.064513 |
| rs1859690  | ZNF498  | 7 | 99065108 | 6 | 0.845285 |
| rs15524    | CYP3A5  | 7 | 99083850 | 6 | 1.047212 |
| rs15524    | CYP3A5  | 7 | 99083850 | 1 | 5.756835 |
| rs15524    | CYP3A5  | 7 | 99083850 | 4 | 0.600768 |
| rs10211    | CYP3A7  | 7 | 99140930 | 6 | 0.302632 |
| rs10211    | CYP3A7  | 7 | 99140930 | 4 | 0.912605 |
| rs12360    | CYP3A7  | 7 | 99141030 | 3 | 0.680881 |
| rs12360    | CYP3A7  | 7 | 99141030 | 5 | 0.949265 |
| rs12360    | CYP3A7  | 7 | 99141030 | 8 | 0.587739 |
| rs12360    | CYP3A7  | 7 | 99141030 | 2 | 1.182363 |
| rs12360    | CYP3A7  | 7 | 99141030 | 1 | 0.853617 |
| rs2257401  | CYP3A7  | 7 | 99144621 | 4 | 1.677558 |
| rs2257401  | CYP3A7  | 7 | 99144621 | 6 | 0.013523 |
| rs17161997 | OR2AE1  | 7 | 99311794 | 7 | 0.360316 |
| rs17277546 | TRIM4   | 7 | 99327507 | 7 | 1.113781 |
| rs11558476 | ZSCAN21 | 7 | 99492625 | 4 | 1.75479  |
| rs11558476 | ZSCAN21 | 7 | 99492625 | 1 | 4.565513 |
| rs1534310  | MCM7    | 7 | 99537105 | 3 | 0.673568 |
| rs1534310  | MCM7    | 7 | 99537105 | 5 | 0.242483 |
| rs4134932  | AP4M1   | 7 | 99542384 | 1 | 5.540499 |
| rs3807479  | TAF6    | 7 | 99554837 | 3 | 0.518814 |
| rs3807479  | TAF6    | 7 | 99554837 | 1 | 2.537642 |
| rs3807479  | TAF6    | 7 | 99554837 | 5 | 1.238352 |
| rs3735241  | STAG3   | 7 | 99634082 | 4 | 0.184591 |
| rs3735241  | STAG3   | 7 | 99634082 | 3 | 1.222782 |
| rs3735241  | STAG3   | 7 | 99634082 | 5 | 1.239556 |
| rs3735241  | STAG3   | 7 | 99634082 | 1 | 3.637403 |
| rs1043915  | STAG3   | 7 | 99637781 | 5 | 0.662243 |
| rs941287   | GATS    | 7 | 99645409 | 1 | 6.148053 |
| rs941287   | GATS    | 7 | 99645409 | 5 | 0.054287 |
| rs941287   | GATS    | 7 | 99645409 | 4 | 4.824346 |
| rs941287   | GATS    | 7 | 99645409 | 3 | 0.664057 |
| rs705867   | PVRIG   | 7 | 99656863 | 4 | 0.154583 |
| rs705867   | PVRIG   | 7 | 99656863 | 3 | 0.8599   |
| rs705867   | PVRIG   | 7 | 99656863 | 5 | 0.128705 |
| rs705867   | PVRIG   | 7 | 99656863 | 1 | 0.170922 |
| rs2405442  | PILRA   | 7 | 99809249 | 5 | 1.381348 |
| rs2405442  | PILRA   | 7 | 99809249 | 3 | 2.583473 |
| rs7783159  | ZCWPW1  | 7 | 99855390 | 1 | 3.348976 |
| rs7783159  | ZCWPW1  | 7 | 99855390 | 3 | 0.873679 |
| rs7783159  | ZCWPW1  | 7 | 99855390 | 6 | 1.017855 |
| rs7783159  | ZCWPW1  | 7 | 99855390 | 4 | 4.794516 |

|                |         |   |           |   |          |
|----------------|---------|---|-----------|---|----------|
| rs7783159      | ZCWPW1  | 7 | 99855390  | 7 | 0.050816 |
| rs12539172     | C7orf51 | 7 | 99929731  | 3 | 0.922667 |
| rs12539172     | C7orf51 | 7 | 99929731  | 5 | 0.248949 |
| SNP7-99998200  | HRBL    | 7 | 99998200  | 6 | 0.508743 |
| SNP7-99998200  | HRBL    | 7 | 99998200  | 1 | 3.371069 |
| rs34440977     | LRCH4   | 7 | 100017996 | 6 | 1.98016  |
| rs2075674      | TFR2    | 7 | 100062967 | 1 | 0.67088  |
| rs2075674      | TFR2    | 7 | 100062967 | 5 | 0.760071 |
| rs2075674      | TFR2    | 7 | 100062967 | 4 | 0.805928 |
| rs2075674      | TFR2    | 7 | 100062967 | 8 | 0.52506  |
| rs2075674      | TFR2    | 7 | 100062967 | 2 | 0.961356 |
| rs221789       | GNB2    | 7 | 100109457 | 2 | 1.804899 |
| rs221789       | GNB2    | 7 | 100109457 | 4 | 2.447735 |
| rs2272572      | PERQ1   | 7 | 100123824 | 4 | 0.512435 |
| rs2272572      | PERQ1   | 7 | 100123824 | 8 | 0.454863 |
| rs2272572      | PERQ1   | 7 | 100123824 | 2 | 0.227433 |
| rs2272572      | PERQ1   | 7 | 100123824 | 5 | 0.004075 |
| rs2272572      | PERQ1   | 7 | 100123824 | 1 | 0.695229 |
| GA024740       | GIGYF1  | 7 | 100124371 | 1 | 0.471695 |
| GA024740       | GIGYF1  | 7 | 100124371 | 5 | 0.002774 |
| GA024740       | GIGYF1  | 7 | 100124371 | 8 | 2.259188 |
| GA024740       | GIGYF1  | 7 | 100124371 | 2 | 1.260455 |
| GA024740       | GIGYF1  | 7 | 100124371 | 4 | 0.138242 |
| GA024742       | POP7    | 7 | 100142800 | 4 | 0.857294 |
| GA024742       | POP7    | 7 | 100142800 | 2 | 4.420822 |
| SNP7-100209036 | ZAN     | 7 | 100209036 | 8 | 2.002714 |
| SNP7-100209036 | ZAN     | 7 | 100209036 | 1 | 2.773215 |
| SNP7-100209036 | ZAN     | 7 | 100209036 | 6 | 2.907798 |
| SNP7-100209036 | ZAN     | 7 | 100209036 | 2 | 3.381912 |
| SNP7-100209036 | ZAN     | 7 | 100209036 | 5 | 1.96238  |
| SNP7-100209036 | ZAN     | 7 | 100209036 | 7 | 1.387979 |
| rs314299       | ZAN     | 7 | 100209409 | 1 | 0.154672 |
| rs542137       | ZAN     | 7 | 100211013 | 7 | 1.908907 |
| rs542137       | ZAN     | 7 | 100211013 | 5 | 0.356107 |
| rs539445       | ZAN     | 7 | 100211303 | 4 | 0.641629 |
| rs539445       | ZAN     | 7 | 100211303 | 7 | 0.18353  |
| rs539445       | ZAN     | 7 | 100211303 | 2 | 1.155804 |
| rs539445       | ZAN     | 7 | 100211303 | 1 | 0.384899 |
| SNP7-100215018 | ZAN     | 7 | 100215018 | 5 | 1.136046 |
| SNP7-100215018 | ZAN     | 7 | 100215018 | 1 | 2.051623 |
| rs314344       | ZAN     | 7 | 100232939 | 2 | 0.134545 |
| rs314344       | ZAN     | 7 | 100232939 | 1 | 0.314987 |
| rs314344       | ZAN     | 7 | 100232939 | 7 | 0.33436  |
| rs2230585      | EPHB4   | 7 | 100248533 | 7 | 0.85132  |
| rs2230585      | EPHB4   | 7 | 100248533 | 1 | 0.108183 |
| rs2230585      | EPHB4   | 7 | 100248533 | 8 | 4.686508 |
| rs2230585      | EPHB4   | 7 | 100248533 | 5 | 0.336757 |

|                |            |   |           |   |          |
|----------------|------------|---|-----------|---|----------|
| rs2230585      | EPHB4      | 7 | 100248533 | 4 | 0.90735  |
| rs2230585      | EPHB4      | 7 | 100248533 | 2 | 1.00674  |
| rs314359       | EPHB4      | 7 | 100249214 | 1 | 0.133886 |
| rs314359       | EPHB4      | 7 | 100249214 | 7 | 0.923745 |
| rs314359       | EPHB4      | 7 | 100249214 | 2 | 0.604028 |
| rs144173       | EPHB4      | 7 | 100254186 | 2 | 1.268767 |
| rs144173       | EPHB4      | 7 | 100254186 | 5 | 0.781469 |
| rs144173       | EPHB4      | 7 | 100254186 | 8 | 1.421829 |
| rs144173       | EPHB4      | 7 | 100254186 | 7 | 1.274833 |
| rs144173       | EPHB4      | 7 | 100254186 | 1 | 0.741561 |
| rs144173       | EPHB4      | 7 | 100254186 | 4 | 1.122354 |
| rs6706         | TRIP6      | 7 | 100308980 | 4 | 1.071071 |
| rs6706         | TRIP6      | 7 | 100308980 | 3 | 3.91451  |
| rs11171        | ARS2       | 7 | 100324046 | 2 | 2.276187 |
| rs13241786     | tcag7.1226 | 7 | 100324592 | 2 | 3.171572 |
| rs13241786     | tcag7.1226 | 7 | 100324592 | 8 | 7.091869 |
| rs13241786     | tcag7.1226 | 7 | 100324592 | 4 | 1.085433 |
| rs13241786     | tcag7.1226 | 7 | 100324592 | 1 | 0.340959 |
| rs13241786     | tcag7.1226 | 7 | 100324592 | 5 | 0.561009 |
| rs10953305     | LOC729931  | 7 | 100330504 | 7 | 0.744883 |
| rs10953305     | LOC729931  | 7 | 100330504 | 5 | 1.889113 |
| rs10953305     | LOC729931  | 7 | 100330504 | 8 | 1.046007 |
| rs10953305     | LOC729931  | 7 | 100330504 | 1 | 0.974768 |
| rs10953305     | LOC729931  | 7 | 100330504 | 6 | 1.951454 |
| rs10953305     | LOC729931  | 7 | 100330504 | 4 | 1.2063   |
| SNP7-100462232 | MUC17      | 7 | 100462232 | 2 | 0.107601 |
| SNP7-100462696 | MUC17      | 7 | 100462696 | 3 | 0.190137 |
| rs1006507      | C7orf52    | 7 | 100600754 | 5 | 0.40425  |
| rs1006507      | C7orf52    | 7 | 100600754 | 4 | 0.03586  |
| rs1006507      | C7orf52    | 7 | 100600754 | 8 | 0.220434 |
| rs1006507      | C7orf52    | 7 | 100600754 | 1 | 1.199753 |
| rs1859528      | C7orf52    | 7 | 100600798 | 4 | 0.596906 |
| rs1859528      | C7orf52    | 7 | 100600798 | 8 | 0.338598 |
| rs1859528      | C7orf52    | 7 | 100600798 | 1 | 4.923384 |
| rs1859528      | C7orf52    | 7 | 100600798 | 5 | 0.746533 |
| GA024770       | PLOD3      | 7 | 100645954 | 6 | 5.522035 |
| rs1056678      | PLOD3      | 7 | 100647356 | 2 | 0.922068 |
| rs1056678      | PLOD3      | 7 | 100647356 | 7 | 0.640841 |
| rs1056678      | PLOD3      | 7 | 100647356 | 6 | 0.065257 |
| rs17393069     | EMID2      | 7 | 100987447 | 4 | 0.900306 |
| rs17393069     | EMID2      | 7 | 100987447 | 5 | 0.190182 |
| rs2240389      | MYLC2PL    | 7 | 101043553 | 7 | 0.272847 |
| rs17498164     | CUX1       | 7 | 101623869 | 7 | 1.041718 |
| rs17498164     | CUX1       | 7 | 101623869 | 6 | 0.490565 |
| rs17498164     | CUX1       | 7 | 101623869 | 4 | 1.211219 |
| rs10279449     | FBXL13     | 7 | 102249872 | 4 | 2.5123   |
| rs10279449     | FBXL13     | 7 | 102249872 | 1 | 4.034189 |

|                |          |   |           |   |          |
|----------------|----------|---|-----------|---|----------|
| rs10279449     | FBXL13   | 7 | 102249872 | 3 | 1.046075 |
| rs17135923     | FBXL13   | 7 | 102340839 | 5 | 0.690939 |
| rs3800939      | LRRRC17  | 7 | 102361951 | 1 | 2.969135 |
| rs3800939      | LRRRC17  | 7 | 102361951 | 4 | 5.877508 |
| rs3800939      | LRRRC17  | 7 | 102361951 | 3 | 1.044269 |
| rs3808039      | RELN     | 7 | 102938672 | 1 | 2.172452 |
| rs2229864      | RELN     | 7 | 102942941 | 5 | 2.275077 |
| SNP7-103079437 | RELN     | 7 | 103079437 | 1 | 0.196791 |
| rs766981       | MLL5     | 7 | 104529851 | 7 | 1.219286 |
| SNP7-105402642 | FLJ23834 | 7 | 105402642 | 8 | 1.839424 |
| rs10258293     | FLJ23834 | 7 | 105449926 | 7 | 0.865885 |
| rs2230460      | PIK3CG   | 7 | 106311925 | 1 | 1.678774 |
| rs2230460      | PIK3CG   | 7 | 106311925 | 4 | 1.522132 |
| rs2230460      | PIK3CG   | 7 | 106311925 | 5 | 2.195169 |
| rs2712218      | SLC26A4  | 7 | 107143995 | 3 | 1.400007 |
| SNP7-107214558 | SLC26A3  | 7 | 107214558 | 5 | 0.891147 |
| rs8721         | DLD      | 7 | 107346958 | 5 | 1.125404 |
| rs8721         | DLD      | 7 | 107346958 | 3 | 0.202666 |
| rs8721         | DLD      | 7 | 107346958 | 7 | 0.456233 |
| rs3177964      | LAMB1    | 7 | 107356753 | 2 | 1.451549 |
| rs3177964      | LAMB1    | 7 | 107356753 | 7 | 4.532067 |
| rs3177964      | LAMB1    | 7 | 107356753 | 8 | 4.252488 |
| rs3177964      | LAMB1    | 7 | 107356753 | 3 | 0.707435 |
| rs3177964      | LAMB1    | 7 | 107356753 | 5 | 0.351695 |
| rs4730283      | LAMB1    | 7 | 107381225 | 1 | 1.729891 |
| rs4730283      | LAMB1    | 7 | 107381225 | 2 | 0.538891 |
| rs25659        | LAMB1    | 7 | 107414006 | 8 | 2.324391 |
| rs25659        | LAMB1    | 7 | 107414006 | 3 | 0.074511 |
| rs9690688      | LAMB4    | 7 | 107507398 | 6 | 0.903268 |
| rs9690688      | LAMB4    | 7 | 107507398 | 1 | 1.280012 |
| rs3815246      | LAMB4    | 7 | 107526118 | 6 | 0.350697 |
| rs451252       | LAMB4    | 7 | 107526184 | 6 | 0.41831  |
| rs451252       | LAMB4    | 7 | 107526184 | 3 | 0.438407 |
| rs449077       | NRCAM    | 7 | 107577163 | 7 | 0.403388 |
| rs401433       | NRCAM    | 7 | 107612125 | 3 | 0.811607 |
| rs2227272      | THAP5    | 7 | 107996859 | 4 | 1.056593 |
| rs2227272      | THAP5    | 7 | 107996859 | 8 | 2.406236 |
| rs2227272      | THAP5    | 7 | 107996859 | 1 | 4.754637 |
| rs2074796      | IFRD1    | 7 | 111899515 | 7 | 0.577183 |
| rs2074796      | IFRD1    | 7 | 111899515 | 5 | 5.557998 |
| rs2074796      | IFRD1    | 7 | 111899515 | 6 | 8.59669  |
| rs2074796      | IFRD1    | 7 | 111899515 | 3 | 0.420859 |
| rs2256044      | GPR85    | 7 | 112511653 | 4 | 1.323725 |
| rs2256044      | GPR85    | 7 | 112511653 | 1 | 2.843032 |
| rs1575012      | GPR85    | 7 | 112512031 | 8 | 2.118161 |
| rs1575012      | GPR85    | 7 | 112512031 | 1 | 1.323086 |
| rs10274994     | PPP1R3A  | 7 | 113302589 | 7 | 0.081859 |



|                |             |   |           |   |          |
|----------------|-------------|---|-----------|---|----------|
| rs10274994     | PPP1R3A     | 7 | 113302589 | 3 | 0.03797  |
| rs10274994     | PPP1R3A     | 7 | 113302589 | 1 | 0.132869 |
| rs7789198      | PPP1R3A     | 7 | 113303463 | 3 | 0.986622 |
| rs4730700      | TFEC        | 7 | 115364898 | 4 | 1.497523 |
| rs10229962     | TFEC        | 7 | 115365360 | 3 | 1.171815 |
| rs8940         | CAV2        | 7 | 115933310 | 3 | 0.352151 |
| rs8940         | CAV2        | 7 | 115933310 | 1 | 3.039101 |
| rs8940         | CAV2        | 7 | 115933310 | 6 | 1.270403 |
| rs1049334      | CAV1        | 7 | 115987616 | 2 | 7.399076 |
| rs1049334      | CAV1        | 7 | 115987616 | 6 | 1.82211  |
| rs2228946      | WNT2        | 7 | 116705321 | 3 | 0.124301 |
| rs1800076      | CFTR        | 7 | 116936383 | 5 | 1.387856 |
| rs1800136      | CFTR        | 7 | 117094344 | 6 | 0.131448 |
| rs798937       | C7orf58     | 7 | 120527339 | 4 | 0.495206 |
| rs35391640     | WNT16       | 7 | 120756648 | 1 | 0.007228 |
| rs2707466      | WNT16       | 7 | 120766325 | 6 | 1.778975 |
| rs2707466      | WNT16       | 7 | 120766325 | 7 | 1.331474 |
| rs2707466      | WNT16       | 7 | 120766325 | 5 | 0.304524 |
| rs2707466      | WNT16       | 7 | 120766325 | 8 | 1.704599 |
| rs6961822      | LOC136143   | 7 | 120868165 | 7 | 3.008647 |
| rs6961822      | LOC136143   | 7 | 120868165 | 3 | 3.969936 |
| rs10234745     | IQUB        | 7 | 122884704 | 6 | 0.90599  |
| rs10234745     | IQUB        | 7 | 122884704 | 4 | 0.260335 |
| rs10500091     | IQUB        | 7 | 122907226 | 4 | 0.472676 |
| rs10500091     | IQUB        | 7 | 122907226 | 6 | 0.183326 |
| rs10255061     | IQUB        | 7 | 122939255 | 4 | 0.277622 |
| rs4731119      | WASL        | 7 | 123176329 | 6 | 0.957129 |
| rs4731119      | WASL        | 7 | 123176329 | 5 | 0.382507 |
| rs1034955      | HYAL4       | 7 | 123295545 | 1 | 0.277953 |
| rs1034955      | HYAL4       | 7 | 123295545 | 7 | 0.072082 |
| rs1034955      | HYAL4       | 7 | 123295545 | 4 | 5.287323 |
| rs724356       | GPR37       | 7 | 124174610 | 6 | 0.926452 |
| rs1871773      | LOC646837   | 7 | 124462175 | 4 | 2.6299   |
| rs1871773      | LOC646837   | 7 | 124462175 | 1 | 2.061903 |
| rs1871773      | LOC646837   | 7 | 124462175 | 6 | 2.294453 |
| rs1871773      | LOC646837   | 7 | 124462175 | 7 | 2.759986 |
| rs712723       | GRM8        | 7 | 125866380 | 5 | 2.893929 |
| rs712723       | GRM8        | 7 | 125866380 | 6 | 2.052039 |
| rs712723       | GRM8        | 7 | 125866380 | 3 | 1.683799 |
| SNP7-127012108 | GCC1        | 7 | 127012108 | 2 | 3.459527 |
| rs712700       | PAX4        | 7 | 127038143 | 3 | 1.388098 |
| rs3823994      | LRRC4       | 7 | 127457093 | 7 | 1.153852 |
| rs3823994      | LRRC4       | 7 | 127457093 | 6 | 0.461196 |
| rs3097362      | hCG_1651889 | 7 | 127788639 | 5 | 0.809441 |
| rs3097362      | hCG_1651889 | 7 | 127788639 | 7 | 0.441044 |
| rs3097362      | hCG_1651889 | 7 | 127788639 | 3 | 0.096919 |
| rs2228075      | IMPDH1      | 7 | 127821865 | 6 | 0.408174 |

|                |         |   |           |   |          |
|----------------|---------|---|-----------|---|----------|
| rs11769769     | FAM71F2 | 7 | 128099686 | 3 | 0.80682  |
| rs11769769     | FAM71F2 | 7 | 128099686 | 5 | 1.078942 |
| rs11769769     | FAM71F2 | 7 | 128099686 | 7 | 0.662756 |
| SNP7-128103118 | FAM71F2 | 7 | 128103118 | 5 | 0.626074 |
| SNP7-128103118 | FAM71F2 | 7 | 128103118 | 2 | 1.52523  |
| SNP7-128103118 | FAM71F2 | 7 | 128103118 | 3 | 0.38025  |
| SNP7-128103118 | FAM71F2 | 7 | 128103118 | 7 | 0.004731 |
| rs6467210      | FAM71F2 | 7 | 128104894 | 3 | 1.137208 |
| rs6467210      | FAM71F2 | 7 | 128104894 | 7 | 0.839018 |
| rs6467210      | FAM71F2 | 7 | 128104894 | 5 | 0.295592 |
| rs6467210      | FAM71F2 | 7 | 128104894 | 6 | 2.306783 |
| rs1109552      | FAM71F2 | 7 | 128110270 | 3 | 0.465688 |
| rs1109552      | FAM71F2 | 7 | 128110270 | 7 | 0.468237 |
| rs1109552      | FAM71F2 | 7 | 128110270 | 6 | 1.249965 |
| rs1109552      | FAM71F2 | 7 | 128110270 | 5 | 0.352131 |
| rs1109552      | FAM71F2 | 7 | 128110270 | 2 | 4.146359 |
| rs745229       | FAM71F1 | 7 | 128146127 | 3 | 0.343034 |
| rs339065       | FAM71F1 | 7 | 128158534 | 8 | 1.000994 |
| rs101721       | FAM71F1 | 7 | 128158651 | 7 | 0.334013 |
| rs101721       | FAM71F1 | 7 | 128158651 | 3 | 0.774798 |
| rs2290228      | CALU    | 7 | 128175884 | 2 | 0.00784  |
| rs2290228      | CALU    | 7 | 128175884 | 1 | 0.107292 |
| rs2290228      | CALU    | 7 | 128175884 | 8 | 3.412355 |
| rs1799922      | OPN1SW  | 7 | 128202431 | 7 | 0.426094 |
| rs1799922      | OPN1SW  | 7 | 128202431 | 4 | 0.483502 |
| rs1799922      | OPN1SW  | 7 | 128202431 | 5 | 0.429952 |
| rs2270590      | CCDC136 | 7 | 128243152 | 4 | 0.819221 |
| rs2270590      | CCDC136 | 7 | 128243152 | 5 | 1.11321  |
| rs2291561      | FLNC    | 7 | 128264783 | 5 | 0.336781 |
| rs2291561      | FLNC    | 7 | 128264783 | 6 | 1.102343 |
| rs2291562      | FLNC    | 7 | 128265339 | 6 | 0.744964 |
| rs2291568      | FLNC    | 7 | 128275129 | 6 | 1.732185 |
| rs2291569      | FLNC    | 7 | 128275970 | 6 | 1.104585 |
| rs2291569      | FLNC    | 7 | 128275970 | 5 | 2.155092 |
| GA024891       | FLNC    | 7 | 128286315 | 2 | 3.540835 |
| SNP7-128292746 | ATP6V1F | 7 | 128292746 | 2 | 1.281097 |
| SNP7-128292746 | ATP6V1F | 7 | 128292746 | 6 | 5.268331 |
| SNP7-128292746 | ATP6V1F | 7 | 128292746 | 4 | 2.33986  |
| SNP7-128292746 | ATP6V1F | 7 | 128292746 | 1 | 2.315698 |
| SNP7-128292746 | ATP6V1F | 7 | 128292746 | 7 | 1.615527 |
| SNP7-128292746 | ATP6V1F | 7 | 128292746 | 8 | 4.454928 |
| SNP7-128292746 | ATP6V1F | 7 | 128292746 | 3 | 1.903871 |
| SNP7-128292746 | ATP6V1F | 7 | 128292746 | 5 | 1.228688 |
| SNP7-128376724 | IRF5    | 7 | 128376724 | 7 | 1.370829 |
| SNP7-128376724 | IRF5    | 7 | 128376724 | 3 | 2.407343 |
| SNP7-128376724 | IRF5    | 7 | 128376724 | 4 | 1.24128  |
| SNP7-128376869 | IRF5    | 7 | 128376869 | 3 | 3.220087 |

|                |           |   |           |   |          |
|----------------|-----------|---|-----------|---|----------|
| SNP7-128376869 | IRF5      | 7 | 128376869 | 7 | 1.622247 |
| SNP7-128376869 | IRF5      | 7 | 128376869 | 4 | 1.971503 |
| rs3824         | SMO       | 7 | 128640089 | 2 | 7.001693 |
| rs9607         | SMO       | 7 | 128640293 | 4 | 1.170407 |
| rs9607         | SMO       | 7 | 128640293 | 2 | 5.304063 |
| rs7639         | UBE2H     | 7 | 129260667 | 5 | 5.635811 |
| rs7639         | UBE2H     | 7 | 129260667 | 7 | 2.315641 |
| rs7639         | UBE2H     | 7 | 129260667 | 6 | 5.812341 |
| rs7639         | UBE2H     | 7 | 129260667 | 1 | 6.1199   |
| rs7639         | UBE2H     | 7 | 129260667 | 4 | 6.567744 |
| rs7639         | UBE2H     | 7 | 129260667 | 3 | 6.256615 |
| rs7639         | UBE2H     | 7 | 129260667 | 8 | 0.385236 |
| rs1046691      | UBE2H     | 7 | 129260975 | 1 | 3.252365 |
| rs1046691      | UBE2H     | 7 | 129260975 | 3 | 0.44717  |
| rs1046691      | UBE2H     | 7 | 129260975 | 5 | 4.006599 |
| rs9641870      | CPA2      | 7 | 129703751 | 5 | 0.379356 |
| rs9641870      | CPA2      | 7 | 129703751 | 1 | 3.239275 |
| rs1544705      | CPA5      | 7 | 129789553 | 1 | 0.513511 |
| rs1544705      | CPA5      | 7 | 129789553 | 7 | 1.27555  |
| rs11765961     | CPA5      | 7 | 129795495 | 7 | 1.320056 |
| SNP7-129795521 | CPA5      | 7 | 129795521 | 4 | 1.266539 |
| SNP7-129795521 | CPA5      | 7 | 129795521 | 3 | 1.400115 |
| SNP7-129795521 | CPA5      | 7 | 129795521 | 1 | 1.289102 |
| SNP7-129795521 | CPA5      | 7 | 129795521 | 2 | 1.560211 |
| rs968404       | CPA1      | 7 | 129809277 | 3 | 0.337009 |
| rs12706927     | CPA1      | 7 | 129810775 | 4 | 1.189976 |
| rs12706927     | CPA1      | 7 | 129810775 | 1 | 0.929311 |
| rs12706927     | CPA1      | 7 | 129810775 | 3 | 1.321095 |
| rs12706927     | CPA1      | 7 | 129810775 | 2 | 1.371774 |
| rs2287371      | TSGA14    | 7 | 129868048 | 7 | 0.487389 |
| rs2287371      | TSGA14    | 7 | 129868048 | 3 | 0.394469 |
| rs2287371      | TSGA14    | 7 | 129868048 | 8 | 0.617361 |
| rs3807139      | TSGA13    | 7 | 130021865 | 4 | 0.778097 |
| rs1965692      | LOC442723 | 7 | 130577997 | 6 | 0.324325 |
| rs1965692      | LOC442723 | 7 | 130577997 | 1 | 1.26803  |
| rs1965692      | LOC442723 | 7 | 130577997 | 2 | 1.96924  |
| rs1965692      | LOC442723 | 7 | 130577997 | 4 | 0.938823 |
| rs1045046      | PODXL     | 7 | 130836876 | 4 | 0.234289 |
| rs1045046      | PODXL     | 7 | 130836876 | 5 | 0.164456 |
| rs1045046      | PODXL     | 7 | 130836876 | 6 | 0.150283 |
| rs3735035      | PODXL     | 7 | 130846499 | 4 | 7.200714 |
| rs1862047      | SLC35B4   | 7 | 133628618 | 3 | 0.032715 |
| rs1862047      | SLC35B4   | 7 | 133628618 | 4 | 0.608915 |
| rs1862047      | SLC35B4   | 7 | 133628618 | 8 | 0.382192 |
| rs1862047      | SLC35B4   | 7 | 133628618 | 6 | 0.173255 |
| rs1862047      | SLC35B4   | 7 | 133628618 | 5 | 0.484855 |
| rs1862048      | SLC35B4   | 7 | 133628707 | 3 | 0.061376 |

|            |           |   |           |   |          |
|------------|-----------|---|-----------|---|----------|
| rs1862048  | SLC35B4   | 7 | 133628707 | 6 | 0.855876 |
| rs1862048  | SLC35B4   | 7 | 133628707 | 4 | 0.002919 |
| rs1862048  | SLC35B4   | 7 | 133628707 | 8 | 0.555264 |
| rs1862048  | SLC35B4   | 7 | 133628707 | 5 | 0.375621 |
| rs1035328  | SLC35B4   | 7 | 133628959 | 4 | 1.211428 |
| rs1035328  | SLC35B4   | 7 | 133628959 | 8 | 3.760871 |
| rs1035328  | SLC35B4   | 7 | 133628959 | 3 | 1.517089 |
| rs1035328  | SLC35B4   | 7 | 133628959 | 6 | 1.48982  |
| rs1035328  | SLC35B4   | 7 | 133628959 | 5 | 2.872084 |
| rs2241334  | SLC35B4   | 7 | 133629765 | 4 | 0.166404 |
| rs2241334  | SLC35B4   | 7 | 133629765 | 6 | 0.196308 |
| rs2241334  | SLC35B4   | 7 | 133629765 | 5 | 0.235796 |
| rs2241334  | SLC35B4   | 7 | 133629765 | 3 | 0.185951 |
| rs2241334  | SLC35B4   | 7 | 133629765 | 8 | 0.030878 |
| rs2037004  | AKR1B10   | 7 | 133863151 | 1 | 5.770794 |
| rs2037004  | AKR1B10   | 7 | 133863151 | 3 | 0.508271 |
| rs1722883  | AKR1B10   | 7 | 133865943 | 1 | 0.009253 |
| rs4728329  | AKR1B10   | 7 | 133876367 | 3 | 0.777807 |
| rs3800691  | BPGM      | 7 | 133993867 | 5 | 1.434847 |
| rs2244697  | CALD1     | 7 | 134305405 | 2 | 1.442844 |
| rs2288237  | TMEM140   | 7 | 134500117 | 6 | 0.148403 |
| rs2288237  | TMEM140   | 7 | 134500117 | 7 | 0.522931 |
| rs2288237  | TMEM140   | 7 | 134500117 | 2 | 0.206979 |
| rs2288237  | TMEM140   | 7 | 134500117 | 8 | 2.499893 |
| rs2288237  | TMEM140   | 7 | 134500117 | 4 | 2.762449 |
| rs2288237  | TMEM140   | 7 | 134500117 | 5 | 0.661218 |
| rs2288237  | TMEM140   | 7 | 134500117 | 1 | 1.365496 |
| rs3110800  | SLC13A4   | 7 | 135043416 | 2 | 2.670059 |
| rs3110800  | SLC13A4   | 7 | 135043416 | 6 | 1.894672 |
| rs3110800  | SLC13A4   | 7 | 135043416 | 7 | 2.964861 |
| rs3110800  | SLC13A4   | 7 | 135043416 | 5 | 0.645053 |
| rs3110800  | SLC13A4   | 7 | 135043416 | 4 | 1.23316  |
| rs3110800  | SLC13A4   | 7 | 135043416 | 1 | 0.659254 |
| rs10227032 | UNQ1940   | 7 | 135065286 | 8 | 0.446145 |
| rs10227032 | UNQ1940   | 7 | 135065286 | 4 | 0.35722  |
| rs10227032 | UNQ1940   | 7 | 135065286 | 2 | 1.232965 |
| rs10227032 | UNQ1940   | 7 | 135065286 | 5 | 0.882086 |
| rs17168527 | MTPN      | 7 | 135265280 | 6 | 0.460992 |
| rs17168527 | MTPN      | 7 | 135265280 | 4 | 0.971148 |
| rs10275735 | LOC392100 | 7 | 136049252 | 4 | 4.655251 |
| rs10275735 | LOC392100 | 7 | 136049252 | 5 | 3.624872 |
| rs10275735 | LOC392100 | 7 | 136049252 | 1 | 4.115178 |
| rs7779548  | DGKI      | 7 | 136725080 | 8 | 1.284488 |
| rs7779548  | DGKI      | 7 | 136725080 | 1 | 4.819338 |
| rs7779548  | DGKI      | 7 | 136725080 | 3 | 0.85206  |
| rs1376608  | DGKI      | 7 | 136725301 | 8 | 0.079455 |
| rs1376608  | DGKI      | 7 | 136725301 | 1 | 4.289972 |

|                |           |   |           |   |          |
|----------------|-----------|---|-----------|---|----------|
| rs1376608      | DGKI      | 7 | 136725301 | 3 | 1.905619 |
| rs3735026      | DGKI      | 7 | 136725379 | 1 | 3.471831 |
| rs3735026      | DGKI      | 7 | 136725379 | 8 | 1.135841 |
| rs3735026      | DGKI      | 7 | 136725379 | 3 | 1.716158 |
| rs3735025      | DGKI      | 7 | 136725384 | 3 | 2.318214 |
| rs3735025      | DGKI      | 7 | 136725384 | 1 | 3.849255 |
| rs7783145      | CREB3L2   | 7 | 137215041 | 2 | 0.002047 |
| rs7783145      | CREB3L2   | 7 | 137215041 | 8 | 0.717601 |
| rs7783145      | CREB3L2   | 7 | 137215041 | 1 | 0.251559 |
| rs7783145      | CREB3L2   | 7 | 137215041 | 3 | 0.283874 |
| rs1872929      | AKR1D1    | 7 | 137451953 | 5 | 0.457295 |
| rs1872930      | AKR1D1    | 7 | 137451984 | 5 | 1.118889 |
| rs1439793      | SVOPL     | 7 | 137929768 | 3 | 1.773664 |
| rs1439793      | SVOPL     | 7 | 137929768 | 6 | 0.151437 |
| rs1439793      | SVOPL     | 7 | 137929768 | 1 | 4.492906 |
| rs13238715     | tcag7.441 | 7 | 138037087 | 6 | 4.682082 |
| rs13238715     | tcag7.441 | 7 | 138037087 | 7 | 3.344088 |
| rs13238715     | tcag7.441 | 7 | 138037087 | 2 | 4.275706 |
| rs13238715     | tcag7.441 | 7 | 138037087 | 5 | 3.984053 |
| rs13238715     | tcag7.441 | 7 | 138037087 | 1 | 3.443719 |
| rs6957669      | tcag7.441 | 7 | 138038319 | 4 | 1.147757 |
| rs6957669      | tcag7.441 | 7 | 138038319 | 3 | 0.234762 |
| rs10258719     | ATP6V0A4  | 7 | 138106528 | 1 | 0.185823 |
| rs10258719     | ATP6V0A4  | 7 | 138106528 | 7 | 9.663849 |
| rs2034507      | LOC155006 | 7 | 138140423 | 1 | 1.634009 |
| rs2034507      | LOC155006 | 7 | 138140423 | 8 | 2.885294 |
| rs2718131      | KIAA1549  | 7 | 138253456 | 2 | 0.495955 |
| rs2718131      | KIAA1549  | 7 | 138253456 | 3 | 0.673224 |
| rs2718131      | KIAA1549  | 7 | 138253456 | 1 | 0.082246 |
| rs10265929     | ZC3HAV1L  | 7 | 138361443 | 1 | 5.59801  |
| rs3087999      | ZC3HAV1   | 7 | 138382814 | 1 | 3.540831 |
| rs3087999      | ZC3HAV1   | 7 | 138382814 | 5 | 0.127499 |
| rs3087999      | ZC3HAV1   | 7 | 138382814 | 4 | 0.357869 |
| rs2297236      | ZC3HAV1   | 7 | 138390577 | 8 | 0.600058 |
| rs2297236      | ZC3HAV1   | 7 | 138390577 | 5 | 0.235624 |
| rs2297236      | ZC3HAV1   | 7 | 138390577 | 6 | 0.615617 |
| rs9683         | LUC7L2    | 7 | 138758279 | 7 | 0.643149 |
| rs9683         | LUC7L2    | 7 | 138758279 | 6 | 0.665452 |
| SNP7-138818474 | KLRG2     | 7 | 138818474 | 8 | 1.198681 |
| SNP7-138818474 | KLRG2     | 7 | 138818474 | 5 | 0.958911 |
| rs7456421      | LOC653052 | 7 | 139062261 | 6 | 0.946449 |
| rs7456421      | LOC653052 | 7 | 139062261 | 2 | 5.512157 |
| rs4074826      | LOC653052 | 7 | 139062429 | 7 | 9.409945 |
| rs4074826      | LOC653052 | 7 | 139062429 | 2 | 2.26495  |
| rs1044703      | PARP12    | 7 | 139370211 | 3 | 0.073292 |
| rs1128589      | SLC37A3   | 7 | 139680763 | 2 | 1.708214 |
| rs1128589      | SLC37A3   | 7 | 139680763 | 1 | 0.606776 |

|                |         |   |           |   |          |
|----------------|---------|---|-----------|---|----------|
| rs1128589      | SLC37A3 | 7 | 139680763 | 3 | 0.714871 |
| SNP7-139726556 | SLC37A3 | 7 | 139726556 | 6 | 1.042797 |
| SNP7-139726556 | SLC37A3 | 7 | 139726556 | 1 | 0.033668 |
| SNP7-139726556 | SLC37A3 | 7 | 139726556 | 4 | 0.646283 |
| SNP7-139726556 | SLC37A3 | 7 | 139726556 | 2 | 6.918698 |
| SNP7-139726556 | SLC37A3 | 7 | 139726556 | 8 | 8.019981 |
| rs4726807      | RAB19   | 7 | 139772308 | 3 | 0.693812 |
| rs6852         | DENND2A | 7 | 139864933 | 4 | 0.462481 |
| rs6852         | DENND2A | 7 | 139864933 | 7 | 3.027375 |
| rs6464833      | DENND2A | 7 | 139873762 | 7 | 0.048304 |
| rs6464833      | DENND2A | 7 | 139873762 | 3 | 0.17408  |
| rs2293177      | DENND2A | 7 | 139891029 | 3 | 0.152476 |
| rs2234002      | TAS2R4  | 7 | 141125269 | 6 | 3.431206 |
| rs2227264      | TAS2R5  | 7 | 141136707 | 6 | 0.469381 |
| rs1726866      | TAS2R38 | 7 | 141319174 | 1 | 2.21545  |
| rs1726866      | TAS2R38 | 7 | 141319174 | 7 | 0.301651 |
| rs1726866      | TAS2R38 | 7 | 141319174 | 5 | 0.866464 |
| rs1726866      | TAS2R38 | 7 | 141319174 | 3 | 0.240313 |
| rs713598       | TAS2R38 | 7 | 141319814 | 1 | 2.192194 |
| rs713598       | TAS2R38 | 7 | 141319814 | 3 | 0.184493 |
| rs1894317      | TRY1    | 7 | 141601605 | 1 | 1.511289 |
| rs7786497      | TRY1    | 7 | 141603981 | 5 | 0.145771 |
| rs361359       | TRBV7-3 | 7 | 141753068 | 4 | 0.352368 |
| rs361359       | TRBV7-3 | 7 | 141753068 | 3 | 0.532319 |
| rs361359       | TRBV7-3 | 7 | 141753068 | 5 | 0.498125 |
| rs9885986      | OR9A2   | 7 | 142434184 | 2 | 1.860529 |
| rs9885986      | OR9A2   | 7 | 142434184 | 7 | 0.428159 |
| SNP7-142546768 | PIP     | 7 | 142546768 | 3 | 0.937527 |
| rs2272251      | CLCN1   | 7 | 142752959 | 2 | 3.660098 |
| rs2272251      | CLCN1   | 7 | 142752959 | 3 | 2.013985 |
| rs1804527      | EPHA1   | 7 | 142798945 | 6 | 0.00956  |
| rs34372369     | EPHA1   | 7 | 142802391 | 1 | 5.526223 |
| rs4595035      | TAS2R60 | 7 | 142851597 | 5 | 0.32647  |
| rs4595035      | TAS2R60 | 7 | 142851597 | 2 | 0.190887 |
| rs10278721     | TAS2R41 | 7 | 142885467 | 2 | 4.562036 |
| rs13229174     | OR2F2   | 7 | 143263766 | 5 | 0.496552 |
| rs2961144      | OR2A5   | 7 | 143378803 | 1 | 1.134108 |
| rs2961144      | OR2A5   | 7 | 143378803 | 5 | 1.915708 |
| rs2961144      | OR2A5   | 7 | 143378803 | 4 | 1.311886 |
| rs6464573      | OR2A5   | 7 | 143379031 | 1 | 0.503688 |
| rs6464573      | OR2A5   | 7 | 143379031 | 5 | 0.75455  |
| rs4407791      | OR2A5   | 7 | 143379297 | 6 | 2.463531 |
| rs4407791      | OR2A5   | 7 | 143379297 | 1 | 2.314851 |
| rs4407791      | OR2A5   | 7 | 143379297 | 3 | 2.421006 |
| rs2961135      | OR2A25  | 7 | 143402870 | 3 | 0.397325 |
| rs10230228     | OR2A2   | 7 | 143437621 | 5 | 1.113824 |
| rs10230228     | OR2A2   | 7 | 143437621 | 1 | 3.475316 |

|                |           |   |           |   |          |
|----------------|-----------|---|-----------|---|----------|
| rs10230228     | OR2A2     | 7 | 143437621 | 2 | 2.845424 |
| rs10252253     | OR2A2     | 7 | 143438237 | 5 | 3.251972 |
| rs10252253     | OR2A2     | 7 | 143438237 | 1 | 4.154204 |
| rs2961160      | OR2A14    | 7 | 143457536 | 3 | 0.317803 |
| rs2961160      | OR2A14    | 7 | 143457536 | 1 | 2.69519  |
| rs2961160      | OR2A14    | 7 | 143457536 | 4 | 0.197308 |
| rs987456       | CNTNAP2   | 7 | 147743920 | 3 | 3.384512 |
| rs987456       | CNTNAP2   | 7 | 147743920 | 5 | 0.933881 |
| rs1062072      | CNTNAP2   | 7 | 147745798 | 6 | 3.809618 |
| rs1062072      | CNTNAP2   | 7 | 147745798 | 7 | 0.841994 |
| rs2530311      | CNTNAP2   | 7 | 147747383 | 6 | 1.963434 |
| rs10251347     | CNTNAP2   | 7 | 147748379 | 1 | 4.697567 |
| rs2530310      | CNTNAP2   | 7 | 147748575 | 4 | 0.583534 |
| rs17171006     | CNTNAP2   | 7 | 147748663 | 1 | 3.07085  |
| rs822532       | RNY5      | 7 | 148269156 | 6 | 0.712696 |
| rs1137432      | ZNF425    | 7 | 148432591 | 6 | 5.910312 |
| rs1137432      | ZNF425    | 7 | 148432591 | 1 | 4.981713 |
| rs1137432      | ZNF425    | 7 | 148432591 | 3 | 0.272094 |
| rs1058059      | ZNF398    | 7 | 148510067 | 1 | 4.87606  |
| rs1058059      | ZNF398    | 7 | 148510067 | 3 | 0.094019 |
| rs1058059      | ZNF398    | 7 | 148510067 | 6 | 0.289502 |
| rs6977581      | ZNF783    | 7 | 148621866 | 6 | 2.864126 |
| rs1044678      | ZNF783    | 7 | 148625174 | 4 | 4.272526 |
| rs1044678      | ZNF783    | 7 | 148625174 | 2 | 4.711958 |
| rs10224963     | LOC729986 | 7 | 148752905 | 2 | 1.412489 |
| rs10224963     | LOC729986 | 7 | 148752905 | 7 | 0.359814 |
| rs10224963     | LOC729986 | 7 | 148752905 | 6 | 0.091015 |
| rs10224963     | LOC729986 | 7 | 148752905 | 1 | 0.660618 |
| rs4725821      | ZNF767    | 7 | 148876530 | 6 | 0.583473 |
| rs709065       | KRBA1     | 7 | 149058342 | 8 | 0.293541 |
| SNP7-149061300 | KRBA1     | 7 | 149061300 | 4 | 0.573349 |
| SNP7-149110268 | SSPO      | 7 | 149110268 | 3 | 0.450749 |
| SNP7-149110268 | SSPO      | 7 | 149110268 | 2 | 3.427392 |
| SNP7-149114170 | SSPO      | 7 | 149114170 | 1 | 0.406748 |
| SNP7-149114170 | SSPO      | 7 | 149114170 | 2 | 4.843867 |
| SNP7-149114170 | SSPO      | 7 | 149114170 | 7 | 0.52654  |
| SNP7-149114170 | SSPO      | 7 | 149114170 | 3 | 0.60468  |
| SNP7-149114170 | SSPO      | 7 | 149114170 | 8 | 0.222918 |
| rs855686       | NULL      | 7 | 149114306 | 3 | 0.669646 |
| rs855686       | NULL      | 7 | 149114306 | 7 | 0.596625 |
| rs855686       | NULL      | 7 | 149114306 | 8 | 0.134582 |
| rs855686       | NULL      | 7 | 149114306 | 1 | 0.000205 |
| rs855686       | NULL      | 7 | 149114306 | 2 | 0.189159 |
| rs709060       | NULL      | 7 | 149115992 | 1 | 0.886817 |
| rs709060       | NULL      | 7 | 149115992 | 3 | 0.54973  |
| rs709060       | NULL      | 7 | 149115992 | 7 | 0.246381 |
| rs1076277      | NULL      | 7 | 149120424 | 3 | 0.430117 |

|                |           |   |           |   |          |
|----------------|-----------|---|-----------|---|----------|
| rs2240362      | SSPO      | 7 | 149144010 | 6 | 2.901879 |
| rs2240362      | SSPO      | 7 | 149144010 | 8 | 2.242618 |
| rs1005603      | SSPO      | 7 | 149147814 | 1 | 0.007726 |
| rs1005603      | SSPO      | 7 | 149147814 | 3 | 0.251342 |
| rs10233245     | SSPO      | 7 | 149149081 | 3 | 1.472874 |
| SNP7-149154128 | SSPO      | 7 | 149154128 | 2 | 3.513316 |
| SNP7-149154128 | SSPO      | 7 | 149154128 | 7 | 0.429096 |
| rs10261977     | SSPO      | 7 | 149159195 | 1 | 0.989229 |
| rs10261977     | SSPO      | 7 | 149159195 | 5 | 1.735668 |
| rs4725833      | LOC643641 | 7 | 149187451 | 2 | 2.215202 |
| rs4725833      | LOC643641 | 7 | 149187451 | 7 | 1.086717 |
| rs2240361      | LOC643641 | 7 | 149189342 | 8 | 4.884886 |
| rs2240361      | LOC643641 | 7 | 149189342 | 2 | 1.804619 |
| rs2074700      | LOC643641 | 7 | 149190206 | 8 | 2.540797 |
| rs2074700      | LOC643641 | 7 | 149190206 | 7 | 1.726722 |
| rs2074700      | LOC643641 | 7 | 149190206 | 2 | 3.473339 |
| rs2074701      | LOC643641 | 7 | 149190398 | 8 | 1.634661 |
| SNP7-149192256 | LOC643641 | 7 | 149192256 | 4 | 0.613368 |
| rs2373465      | LOC643641 | 7 | 149194067 | 7 | 0.756953 |
| SNP7-149207751 | ATP6V0E2  | 7 | 149207751 | 7 | 0.225304 |
| rs3735171      | LRR61     | 7 | 149664815 | 5 | 0.207843 |
| rs3735171      | LRR61     | 7 | 149664815 | 1 | 2.242323 |
| rs3735171      | LRR61     | 7 | 149664815 | 3 | 0.965234 |
| rs3735171      | LRR61     | 7 | 149664815 | 4 | 0.638186 |
| rs1047575      | RARRES2   | 7 | 149666433 | 7 | 0.87151  |
| rs1047575      | RARRES2   | 7 | 149666433 | 5 | 1.616702 |
| rs1047575      | RARRES2   | 7 | 149666433 | 1 | 4.695273 |
| rs1047575      | RARRES2   | 7 | 149666433 | 3 | 0.607746 |
| rs1047575      | RARRES2   | 7 | 149666433 | 4 | 1.126997 |
| rs4721         | RARRES2   | 7 | 149666459 | 3 | 0.113961 |
| SNP7-149699538 | REPIN1    | 7 | 149699538 | 4 | 0.134851 |
| SNP7-149699538 | REPIN1    | 7 | 149699538 | 7 | 0.551888 |
| SNP7-149699538 | REPIN1    | 7 | 149699538 | 2 | 0.655631 |
| SNP7-149699538 | REPIN1    | 7 | 149699538 | 5 | 0.394491 |
| SNP7-149699538 | REPIN1    | 7 | 149699538 | 1 | 0.959726 |
| rs940453       | ZNF775    | 7 | 149724634 | 7 | 0.495085 |
| rs759011       | GIMAP5    | 7 | 150070433 | 4 | 0.01012  |
| rs759011       | GIMAP5    | 7 | 150070433 | 5 | 2.382439 |
| rs759011       | GIMAP5    | 7 | 150070433 | 7 | 0.953309 |
| rs1046355      | GIMAP5    | 7 | 150070976 | 5 | 0.896228 |
| rs1046355      | GIMAP5    | 7 | 150070976 | 7 | 0.781622 |
| rs2302481      | TMEM176B  | 7 | 150119401 | 6 | 2.111788 |
| rs2302480      | TMEM176B  | 7 | 150119428 | 6 | 5.282907 |
| rs2302479      | TMEM176B  | 7 | 150119549 | 2 | 1.954142 |
| rs2302479      | TMEM176B  | 7 | 150119549 | 4 | 0.841673 |
| rs2072443      | TMEM176B  | 7 | 150121309 | 4 | 0.726445 |
| rs2072443      | TMEM176B  | 7 | 150121309 | 8 | 4.009641 |



|                |           |   |           |   |          |
|----------------|-----------|---|-----------|---|----------|
| rs2072443      | TMEM176B  | 7 | 150121309 | 6 | 3.783436 |
| SNP7-150132388 | TMEM176A  | 7 | 150132388 | 7 | 0.075599 |
| rs9088         | TMEM176A  | 7 | 150132449 | 2 | 3.38964  |
| rs9088         | TMEM176A  | 7 | 150132449 | 7 | 0.283807 |
| rs9088         | TMEM176A  | 7 | 150132449 | 5 | 2.663313 |
| rs1049742      | ABP1      | 7 | 150185486 | 3 | 1.192131 |
| rs10893        | ABP1      | 7 | 150186848 | 5 | 0.652292 |
| rs4725373      | ABP1      | 7 | 150188555 | 1 | 1.303761 |
| rs4725373      | ABP1      | 7 | 150188555 | 5 | 0.127414 |
| SNP7-150188598 | ABP1      | 7 | 150188598 | 5 | 3.227226 |
| SNP7-150188598 | ABP1      | 7 | 150188598 | 1 | 4.859919 |
| SNP7-150188598 | ABP1      | 7 | 150188598 | 6 | 2.104286 |
| rs1805123      | KCNH2     | 7 | 150276467 | 8 | 1.504257 |
| rs1805123      | KCNH2     | 7 | 150276467 | 1 | 0.097389 |
| rs740952       | KCNH2     | 7 | 150280536 | 5 | 0.889537 |
| rs740952       | KCNH2     | 7 | 150280536 | 2 | 4.391972 |
| rs7830         | ATG9B     | 7 | 150340504 | 4 | 0.565732 |
| rs7830         | ATG9B     | 7 | 150340504 | 5 | 0.120094 |
| rs7830         | ATG9B     | 7 | 150340504 | 3 | 1.93332  |
| rs7830         | ATG9B     | 7 | 150340504 | 2 | 1.435511 |
| rs7830         | ATG9B     | 7 | 150340504 | 8 | 2.614566 |
| rs7830         | ATG9B     | 7 | 150340504 | 6 | 5.915855 |
| rs7830         | ATG9B     | 7 | 150340504 | 1 | 0.250595 |
| rs11977275     | ACCN3     | 7 | 150378870 | 6 | 0.097122 |
| rs310597       | ASB10     | 7 | 150503979 | 3 | 0.259089 |
| rs6949587      | ABCF2     | 7 | 150547161 | 1 | 1.438301 |
| rs6949587      | ABCF2     | 7 | 150547161 | 3 | 0.21949  |
| rs7795959      | LOC401433 | 7 | 150707507 | 2 | 2.956052 |
| rs7795959      | LOC401433 | 7 | 150707507 | 7 | 1.420482 |
| rs7795959      | LOC401433 | 7 | 150707507 | 1 | 0.058682 |
| rs7795959      | LOC401433 | 7 | 150707507 | 3 | 0.121697 |
| rs11767693     | WDR86     | 7 | 150728256 | 6 | 1.546592 |
| rs11767693     | WDR86     | 7 | 150728256 | 3 | 0.93352  |
| rs11767693     | WDR86     | 7 | 150728256 | 2 | 3.455872 |
| rs11767693     | WDR86     | 7 | 150728256 | 8 | 3.429373 |
| rs11767693     | WDR86     | 7 | 150728256 | 5 | 0.139377 |
| rs2075001      | CRYGN     | 7 | 150764204 | 1 | 2.821387 |
| rs13224758     | LOC644090 | 7 | 151135392 | 6 | 0.127484 |
| rs13224758     | LOC644090 | 7 | 151135392 | 5 | 0.137315 |
| rs10257529     | LOC644090 | 7 | 151135432 | 5 | 0.705181 |
| rs10257529     | LOC644090 | 7 | 151135432 | 3 | 0.499106 |
| rs4530949      | LOC644090 | 7 | 151137918 | 1 | 3.48466  |
| SNP7-151441409 | GALNT11   | 7 | 151441409 | 1 | 4.671039 |
| rs967093       | GALNT11   | 7 | 151449710 | 7 | 0.400174 |
| SNP7-151490616 | MLL3      | 7 | 151490616 | 6 | 2.068765 |
| rs7793141      | LOC644333 | 7 | 152076988 | 6 | 2.289121 |
| rs7793141      | LOC644333 | 7 | 152076988 | 8 | 1.506932 |

|                |           |   |           |   |          |
|----------------|-----------|---|-----------|---|----------|
| rs7793141      | LOC644333 | 7 | 152076988 | 1 | 2.374583 |
| rs7793141      | LOC644333 | 7 | 152076988 | 4 | 2.969773 |
| rs7793141      | LOC644333 | 7 | 152076988 | 5 | 4.081081 |
| rs7793141      | LOC644333 | 7 | 152076988 | 3 | 1.920761 |
| rs7793141      | LOC644333 | 7 | 152076988 | 7 | 2.153509 |
| rs7793141      | LOC644333 | 7 | 152076988 | 2 | 1.823233 |
| rs6962199      | FLJ16734  | 7 | 153092539 | 4 | 0.868455 |
| rs6962199      | FLJ16734  | 7 | 153092539 | 7 | 0.360644 |
| rs6962199      | FLJ16734  | 7 | 153092539 | 2 | 2.414064 |
| rs6962199      | FLJ16734  | 7 | 153092539 | 6 | 0.671696 |
| rs3807218      | DPP6      | 7 | 154092045 | 6 | 1.400513 |
| rs3807218      | DPP6      | 7 | 154092045 | 5 | 2.921303 |
| rs2293353      | DPP6      | 7 | 154298561 | 1 | 2.277073 |
| rs2293353      | DPP6      | 7 | 154298561 | 4 | 0.048681 |
| rs2293353      | DPP6      | 7 | 154298561 | 6 | 1.990156 |
| rs17515800     | DPP6      | 7 | 154298576 | 1 | 2.231742 |
| rs3734961      | DPP6      | 7 | 154316495 | 8 | 0.3503   |
| rs3734961      | DPP6      | 7 | 154316495 | 1 | 2.754552 |
| rs3734961      | DPP6      | 7 | 154316495 | 5 | 1.298091 |
| rs3734961      | DPP6      | 7 | 154316495 | 4 | 1.716847 |
| rs1525752      | DPP6      | 7 | 154316545 | 3 | 0.120777 |
| rs1047064      | DPP6      | 7 | 154316738 | 8 | 1.236684 |
| rs1047064      | DPP6      | 7 | 154316738 | 5 | 1.894722 |
| rs1047064      | DPP6      | 7 | 154316738 | 1 | 4.721087 |
| rs1047064      | DPP6      | 7 | 154316738 | 4 | 3.859449 |
| rs1631327      | HTR5A     | 7 | 154507622 | 5 | 0.13336  |
| rs3735576      | NULL      | 7 | 155223841 | 6 | 0.368871 |
| rs2108192      | RBM33     | 7 | 155260717 | 6 | 0.086483 |
| rs9333594      | SHH       | 7 | 155297702 | 7 | 4.229839 |
| rs9333594      | SHH       | 7 | 155297702 | 6 | 3.043023 |
| rs9333594      | SHH       | 7 | 155297702 | 2 | 3.073548 |
| rs7805578      | C7orf13   | 7 | 156124492 | 8 | 5.492363 |
| SNP7-156161894 | RNF32     | 7 | 156161894 | 4 | 5.879033 |
| rs12007        | RNF32     | 7 | 156162381 | 4 | 3.248411 |
| rs2302443      | NOM1      | 7 | 156454985 | 2 | 1.48834  |
| rs2302443      | NOM1      | 7 | 156454985 | 1 | 0.201612 |
| rs2302443      | NOM1      | 7 | 156454985 | 5 | 0.173133 |
| rs7803794      | NOM1      | 7 | 156457804 | 1 | 1.445946 |
| rs7803794      | NOM1      | 7 | 156457804 | 5 | 3.571501 |
| rs6974109      | LOC393078 | 7 | 156927990 | 6 | 0.624595 |
| rs6974109      | LOC393078 | 7 | 156927990 | 3 | 0.22125  |
| rs6974109      | LOC393078 | 7 | 156927990 | 1 | 0.115215 |
| rs4716746      | LOC393078 | 7 | 156954053 | 2 | 3.544263 |
| rs1049329      | PTPRN2    | 7 | 157024589 | 3 | 1.822828 |
| rs1049325      | PTPRN2    | 7 | 157024663 | 3 | 1.339334 |
| rs221252       | PTPRN2    | 7 | 157024911 | 8 | 0.110341 |
| rs221253       | PTPRN2    | 7 | 157024933 | 8 | 0.359615 |

|            |           |   |           |   |          |
|------------|-----------|---|-----------|---|----------|
| rs3189441  | PTPRN2    | 7 | 157025155 | 3 | 1.63303  |
| rs221254   | PTPRN2    | 7 | 157025680 | 8 | 0.024831 |
| rs1130499  | PTPRN2    | 7 | 157623905 | 2 | 1.043096 |
| rs1130499  | PTPRN2    | 7 | 157623905 | 1 | 0.594527 |
| rs1130497  | PTPRN2    | 7 | 157652640 | 1 | 1.687986 |
| rs1130496  | PTPRN2    | 7 | 157652656 | 1 | 0.347357 |
| rs1130496  | PTPRN2    | 7 | 157652656 | 6 | 0.498162 |
| rs1130496  | PTPRN2    | 7 | 157652656 | 5 | 1.009035 |
| rs1130495  | PTPRN2    | 7 | 157652672 | 3 | 1.027697 |
| rs3800855  | PTPRN2    | 7 | 157677910 | 4 | 0.34101  |
| rs3800855  | PTPRN2    | 7 | 157677910 | 1 | 4.714878 |
| rs3800855  | PTPRN2    | 7 | 157677910 | 3 | 0.870557 |
| rs3800855  | PTPRN2    | 7 | 157677910 | 7 | 0.292847 |
| rs4909245  | NCAPG2    | 7 | 158126493 | 6 | 0.132127 |
| rs4909245  | NCAPG2    | 7 | 158126493 | 4 | 3.430826 |
| rs4909245  | NCAPG2    | 7 | 158126493 | 3 | 1.861173 |
| rs4909245  | NCAPG2    | 7 | 158126493 | 7 | 0.534215 |
| rs35914882 | FAM62B    | 7 | 158221030 | 6 | 0.322301 |
| rs35914882 | FAM62B    | 7 | 158221030 | 7 | 0.993328 |
| rs2527202  | WDR60     | 7 | 158431610 | 7 | 1.346894 |
| rs2527202  | WDR60     | 7 | 158431610 | 3 | 1.922926 |
| rs2527202  | WDR60     | 7 | 158431610 | 6 | 0.729442 |
| rs885863   | VIPR2     | 7 | 158513730 | 8 | 1.544731 |
| rs885863   | VIPR2     | 7 | 158513730 | 4 | 4.732852 |
| rs1062610  | VIPR2     | 7 | 158513936 | 4 | 4.490772 |
| rs885861   | VIPR2     | 7 | 158514308 | 5 | 0.640216 |
| rs885861   | VIPR2     | 7 | 158514308 | 8 | 0.378758 |
| rs885861   | VIPR2     | 7 | 158514308 | 4 | 2.291143 |
| rs2730220  | VIPR2     | 7 | 158514819 | 3 | 0.227895 |
| rs763786   | ZNF596    | 8 | 186884    | 8 | 2.993925 |
| rs763786   | ZNF596    | 8 | 186884    | 6 | 3.452249 |
| rs763786   | ZNF596    | 8 | 186884    | 7 | 3.018129 |
| rs3750097  | ZNF596    | 8 | 187042    | 6 | 1.740426 |
| rs3750097  | ZNF596    | 8 | 187042    | 8 | 4.924627 |
| rs3750097  | ZNF596    | 8 | 187042    | 7 | 0.091874 |
| rs10105657 | LOC389607 | 8 | 597251    | 8 | 1.99606  |
| rs10105657 | LOC389607 | 8 | 597251    | 3 | 1.802758 |
| rs10105657 | LOC389607 | 8 | 597251    | 5 | 1.238179 |
| rs10105657 | LOC389607 | 8 | 597251    | 2 | 0.847822 |
| rs10105657 | LOC389607 | 8 | 597251    | 1 | 1.500579 |
| rs10105657 | LOC389607 | 8 | 597251    | 4 | 3.913864 |
| rs11781283 | ERICH1    | 8 | 671206    | 7 | 0.541789 |
| rs11781283 | ERICH1    | 8 | 671206    | 3 | 0.317252 |
| rs2977176  | DLGAP2    | 8 | 1638203   | 7 | 0.049459 |
| rs2977176  | DLGAP2    | 8 | 1638203   | 5 | 0.35649  |
| rs7830545  | DLGAP2    | 8 | 1643725   | 1 | 0.513927 |
| rs7830545  | DLGAP2    | 8 | 1643725   | 7 | 0.163843 |

|            |           |   |         |   |          |
|------------|-----------|---|---------|---|----------|
| rs3812477  | NULL      | 8 | 1721859 | 7 | 0.091926 |
| rs3812477  | NULL      | 8 | 1721859 | 1 | 6.787576 |
| rs3812477  | NULL      | 8 | 1721859 | 3 | 0.406206 |
| rs3812477  | NULL      | 8 | 1721859 | 4 | 0.828914 |
| rs3812477  | NULL      | 8 | 1721859 | 6 | 6.671986 |
| rs1043228  | KBTBD11   | 8 | 1942219 | 4 | 0.027864 |
| rs1043228  | KBTBD11   | 8 | 1942219 | 5 | 2.359946 |
| rs2235122  | MYOM2     | 8 | 2027705 | 7 | 1.186366 |
| rs968381   | MYOM2     | 8 | 2036238 | 5 | 0.533027 |
| rs583087   | CSMD1     | 8 | 2783242 | 3 | 0.587923 |
| rs667859   | CSMD1     | 8 | 2808152 | 7 | 0.14714  |
| rs667859   | CSMD1     | 8 | 2808152 | 5 | 0.074592 |
| rs667595   | CSMD1     | 8 | 2819546 | 5 | 2.414661 |
| rs2161752  | CSMD1     | 8 | 3188284 | 4 | 4.34392  |
| rs1512803  | LOC392180 | 8 | 5694401 | 4 | 2.83992  |
| rs1512803  | LOC392180 | 8 | 5694401 | 1 | 2.875648 |
| rs1512803  | LOC392180 | 8 | 5694401 | 5 | 4.110228 |
| rs3020221  | ANGPT2    | 8 | 6366171 | 1 | 1.875113 |
| rs3020221  | ANGPT2    | 8 | 6366171 | 5 | 0.218162 |
| rs3020221  | ANGPT2    | 8 | 6366171 | 4 | 0.378107 |
| rs3739390  | ANGPT2    | 8 | 6407898 | 7 | 0.12853  |
| rs3739391  | ANGPT2    | 8 | 6407942 | 3 | 0.225867 |
| rs3739391  | ANGPT2    | 8 | 6407942 | 7 | 0.05337  |
| rs2912010  | MCPH1     | 8 | 6466394 | 1 | 0.092111 |
| rs2912010  | MCPH1     | 8 | 6466394 | 6 | 2.641692 |
| rs2912010  | MCPH1     | 8 | 6466394 | 3 | 1.010729 |
| rs2912010  | MCPH1     | 8 | 6466394 | 2 | 1.375712 |
| rs2912010  | MCPH1     | 8 | 6466394 | 8 | 3.102255 |
| rs2433149  | MCPH1     | 8 | 6488159 | 2 | 1.565996 |
| rs2433149  | MCPH1     | 8 | 6488159 | 6 | 4.000735 |
| rs2433149  | MCPH1     | 8 | 6488159 | 1 | 0.194026 |
| rs2433149  | MCPH1     | 8 | 6488159 | 4 | 0.02318  |
| rs17078203 | XKR5      | 8 | 6653898 | 1 | 1.873154 |
| rs2741098  | XKR5      | 8 | 6677686 | 3 | 0.585057 |
| rs2741098  | XKR5      | 8 | 6677686 | 1 | 1.008234 |
| rs2741098  | XKR5      | 8 | 6677686 | 6 | 0.045184 |
| rs2741098  | XKR5      | 8 | 6677686 | 7 | 5.248542 |
| rs1800971  | DEFB1     | 8 | 6715526 | 3 | 0.572223 |
| rs1800971  | DEFB1     | 8 | 6715526 | 8 | 1.901454 |
| rs1800972  | DEFB1     | 8 | 6722833 | 5 | 0.508729 |
| rs4840952  | PRAGMIN   | 8 | 8271487 | 3 | 0.199195 |
| rs4840952  | PRAGMIN   | 8 | 8271487 | 6 | 0.265473 |
| rs4840952  | PRAGMIN   | 8 | 8271487 | 1 | 5.186792 |
| rs2921005  | PRAGMIN   | 8 | 8271523 | 4 | 5.969667 |
| rs4840953  | PRAGMIN   | 8 | 8271602 | 3 | 0.177306 |
| rs4840953  | PRAGMIN   | 8 | 8271602 | 1 | 5.266657 |
| rs4840953  | PRAGMIN   | 8 | 8271602 | 6 | 1.321812 |

|              |         |   |          |   |          |
|--------------|---------|---|----------|---|----------|
| SNP8-8272124 | PRAGMIN | 8 | 8272124  | 3 | 0.47566  |
| SNP8-8272124 | PRAGMIN | 8 | 8272124  | 1 | 4.861032 |
| rs9644774    | CLDN23  | 8 | 8597242  | 6 | 0.605248 |
| rs9644774    | CLDN23  | 8 | 8597242  | 1 | 0.121836 |
| rs12153      | CLDN23  | 8 | 8598319  | 5 | 6.619199 |
| rs12153      | CLDN23  | 8 | 8598319  | 4 | 5.788966 |
| rs12153      | CLDN23  | 8 | 8598319  | 3 | 0.756286 |
| rs2288672    | THEX1   | 8 | 8898030  | 4 | 0.008624 |
| rs2288672    | THEX1   | 8 | 8898030  | 1 | 4.161806 |
| rs11777327   | PPP1R3B | 8 | 9033739  | 8 | 3.878113 |
| rs330922     | PPP1R3B | 8 | 9035208  | 1 | 4.169129 |
| rs330922     | PPP1R3B | 8 | 9035208  | 3 | 0.718059 |
| rs35052906   | TNKS    | 8 | 9605110  | 5 | 0.286344 |
| rs13265931   | TNKS    | 8 | 9646741  | 3 | 0.876518 |
| rs4841215    | TNKS    | 8 | 9675718  | 5 | 0.72229  |
| rs7816990    | RP1L1   | 8 | 10501354 | 1 | 3.470366 |
| rs7816990    | RP1L1   | 8 | 10501354 | 3 | 0.175083 |
| rs7816990    | RP1L1   | 8 | 10501354 | 5 | 0.14287  |
| rs12542071   | RP1L1   | 8 | 10501571 | 1 | 2.614762 |
| rs12542075   | RP1L1   | 8 | 10501616 | 1 | 1.270442 |
| rs12542104   | RP1L1   | 8 | 10501717 | 3 | 0.191399 |
| rs12542104   | RP1L1   | 8 | 10501717 | 1 | 0.864698 |
| rs4840499    | RP1L1   | 8 | 10504986 | 7 | 0.325537 |
| rs1139843    | SOX7    | 8 | 10619507 | 1 | 6.514416 |
| rs3021494    | C8orf15 | 8 | 11020944 | 1 | 5.254822 |
| rs3021494    | C8orf15 | 8 | 11020944 | 6 | 0.969352 |
| rs2164272    | MTMR9   | 8 | 11199906 | 1 | 9.114264 |
| rs2164272    | MTMR9   | 8 | 11199906 | 6 | 1.064917 |
| rs6995404    | MTMR9   | 8 | 11219558 | 1 | 4.936868 |
| rs6995404    | MTMR9   | 8 | 11219558 | 8 | 0.967213 |
| rs6995404    | MTMR9   | 8 | 11219558 | 5 | 4.587377 |
| rs3021511    | C8orf13 | 8 | 11318295 | 4 | 0.652221 |
| rs3021511    | C8orf13 | 8 | 11318295 | 1 | 2.38675  |
| rs2409764    | C8orf13 | 8 | 11318683 | 1 | 1.084142 |
| rs2409764    | C8orf13 | 8 | 11318683 | 6 | 2.777294 |
| rs2409764    | C8orf13 | 8 | 11318683 | 2 | 0.566333 |
| rs2409764    | C8orf13 | 8 | 11318683 | 7 | 1.436047 |
| rs922483     | BLK     | 8 | 11389321 | 3 | 0.235049 |
| rs1042689    | BLK     | 8 | 11459202 | 1 | 0.040735 |
| rs1042689    | BLK     | 8 | 11459202 | 5 | 0.23488  |
| rs1042689    | BLK     | 8 | 11459202 | 3 | 0.62606  |
| rs1062219    | GATA4   | 8 | 11653819 | 6 | 2.3834   |
| rs1062219    | GATA4   | 8 | 11653819 | 7 | 1.314667 |
| rs12458      | GATA4   | 8 | 11654649 | 7 | 0.966684 |
| rs12458      | GATA4   | 8 | 11654649 | 1 | 2.077813 |
| rs1534862    | NEIL2   | 8 | 11681212 | 6 | 3.040343 |
| rs1534862    | NEIL2   | 8 | 11681212 | 4 | 1.167279 |

|               |         |   |          |   |          |
|---------------|---------|---|----------|---|----------|
| rs1534862     | NEIL2   | 8 | 11681212 | 7 | 1.89204  |
| rs1534862     | NEIL2   | 8 | 11681212 | 3 | 3.17412  |
| rs1534862     | NEIL2   | 8 | 11681212 | 1 | 3.857031 |
| rs8191667     | NEIL2   | 8 | 11681225 | 4 | 0.943478 |
| rs8191667     | NEIL2   | 8 | 11681225 | 1 | 4.989157 |
| rs8191667     | NEIL2   | 8 | 11681225 | 7 | 0.291235 |
| rs709821      | CTSB    | 8 | 11740003 | 7 | 0.292017 |
| rs709821      | CTSB    | 8 | 11740003 | 1 | 3.076564 |
| rs1139354     | LONRF1  | 8 | 12645091 | 3 | 0.020504 |
| rs622106      | C8orf79 | 8 | 12923048 | 5 | 1.262872 |
| rs622106      | C8orf79 | 8 | 12923048 | 2 | 0.368819 |
| SNP8-12923178 | C8orf79 | 8 | 12923178 | 8 | 0.879342 |
| SNP8-12923178 | C8orf79 | 8 | 12923178 | 7 | 0.058378 |
| SNP8-12923178 | C8orf79 | 8 | 12923178 | 2 | 0.175336 |
| SNP8-12923178 | C8orf79 | 8 | 12923178 | 1 | 0.555759 |
| SNP8-12923178 | C8orf79 | 8 | 12923178 | 5 | 0.672555 |
| rs3739308     | C8orf79 | 8 | 12923353 | 4 | 3.927506 |
| SNP8-12923470 | C8orf79 | 8 | 12923470 | 7 | 0.250261 |
| rs608909      | C8orf79 | 8 | 12923705 | 7 | 0.147429 |
| rs608909      | C8orf79 | 8 | 12923705 | 5 | 0.475091 |
| rs608909      | C8orf79 | 8 | 12923705 | 2 | 4.203588 |
| rs608052      | C8orf79 | 8 | 12923910 | 7 | 0.205828 |
| rs475181      | C8orf79 | 8 | 12924148 | 5 | 1.907913 |
| rs475181      | C8orf79 | 8 | 12924148 | 7 | 0.168482 |
| rs475181      | C8orf79 | 8 | 12924148 | 2 | 2.463426 |
| rs472347      | C8orf79 | 8 | 12924476 | 2 | 2.696785 |
| rs579024      | C8orf79 | 8 | 12924892 | 2 | 0.975281 |
| rs578076      | C8orf79 | 8 | 12924999 | 1 | 1.446407 |
| rs1044011     | DLC1    | 8 | 12986080 | 4 | 0.425828 |
| rs1044011     | DLC1    | 8 | 12986080 | 1 | 3.622943 |
| rs2027        | DLC1    | 8 | 12986713 | 1 | 3.403709 |
| rs486596      | DLC1    | 8 | 12986881 | 3 | 0.229249 |
| rs658856      | DLC1    | 8 | 12996664 | 1 | 4.152335 |
| rs658856      | DLC1    | 8 | 12996664 | 6 | 1.071767 |
| rs13273355    | C8orf48 | 8 | 13468954 | 6 | 0.430567 |
| rs9650391     | MSR1    | 8 | 16010913 | 3 | 0.575564 |
| rs17624989    | EFHA2   | 8 | 17024400 | 3 | 0.010413 |
| rs17624989    | EFHA2   | 8 | 17024400 | 8 | 0.436072 |
| rs4921756     | MTMR7   | 8 | 17243324 | 2 | 1.520055 |
| rs4921756     | MTMR7   | 8 | 17243324 | 6 | 0.410344 |
| rs6586610     | SLC7A2  | 8 | 17467787 | 5 | 0.993739 |
| rs6586610     | SLC7A2  | 8 | 17467787 | 2 | 3.700063 |
| rs10481       | MTUS1   | 8 | 17545845 | 8 | 0.213092 |
| rs1043883     | MTUS1   | 8 | 17547711 | 6 | 0.80238  |
| rs1043883     | MTUS1   | 8 | 17547711 | 7 | 9.300392 |
| rs1043883     | MTUS1   | 8 | 17547711 | 4 | 1.894869 |
| rs1043883     | MTUS1   | 8 | 17547711 | 2 | 4.109464 |

|               |         |   |          |   |          |
|---------------|---------|---|----------|---|----------|
| rs1043883     | MTUS1   | 8 | 17547711 | 1 | 0.03988  |
| rs1043883     | MTUS1   | 8 | 17547711 | 3 | 0.249459 |
| rs437548      | MTUS1   | 8 | 17599309 | 3 | 0.316163 |
| rs437548      | MTUS1   | 8 | 17599309 | 6 | 0.469813 |
| rs10283       | PCM1    | 8 | 17929686 | 8 | 0.260259 |
| rs10283       | PCM1    | 8 | 17929686 | 7 | 1.231635 |
| rs10283       | PCM1    | 8 | 17929686 | 1 | 4.975633 |
| rs13263632    | ASAH1   | 8 | 17986484 | 7 | 0.296047 |
| rs1041983     | NAT2    | 8 | 18302075 | 3 | 0.392723 |
| rs1041983     | NAT2    | 8 | 18302075 | 5 | 0.008328 |
| rs1799929     | NAT2    | 8 | 18302274 | 2 | 3.08426  |
| rs1799930     | NAT2    | 8 | 18302383 | 5 | 0.546994 |
| rs8695        | PSD3    | 8 | 18432534 | 3 | 3.039732 |
| rs901934      | PSD3    | 8 | 18435454 | 7 | 0.118283 |
| rs2306825     | PSD3    | 8 | 18701085 | 6 | 0.504076 |
| rs2306825     | PSD3    | 8 | 18701085 | 7 | 0.313334 |
| rs2306825     | PSD3    | 8 | 18701085 | 3 | 1.124304 |
| rs13263453    | PSD3    | 8 | 18773776 | 3 | 12.08592 |
| rs13263453    | PSD3    | 8 | 18773776 | 4 | 5.925835 |
| SNP8-18774097 | PSD3    | 8 | 18774097 | 5 | 0.690658 |
| SNP8-18774097 | PSD3    | 8 | 18774097 | 1 | 2.664828 |
| SNP8-18774097 | PSD3    | 8 | 18774097 | 3 | 0.454231 |
| rs1574288     | SH2D4A  | 8 | 19234771 | 4 | 0.199158 |
| rs1574288     | SH2D4A  | 8 | 19234771 | 3 | 0.196497 |
| rs1574288     | SH2D4A  | 8 | 19234771 | 5 | 3.625438 |
| SNP8-19265980 | SH2D4A  | 8 | 19265980 | 5 | 5.056275 |
| SNP8-19265980 | SH2D4A  | 8 | 19265980 | 2 | 9.271598 |
| SNP8-19265980 | SH2D4A  | 8 | 19265980 | 4 | 0.30582  |
| SNP8-19849988 | LPL     | 8 | 19849988 | 8 | 2.514211 |
| rs1121923     | LPL     | 8 | 19853715 | 6 | 1.218205 |
| rs4922115     | LPL     | 8 | 19867110 | 4 | 2.231426 |
| rs4922115     | LPL     | 8 | 19867110 | 1 | 0.101546 |
| rs4922115     | LPL     | 8 | 19867110 | 5 | 1.961666 |
| rs4922115     | LPL     | 8 | 19867110 | 8 | 2.142736 |
| rs3208305     | LPL     | 8 | 19867928 | 1 | 0.418774 |
| rs3208305     | LPL     | 8 | 19867928 | 8 | 4.109933 |
| rs3208305     | LPL     | 8 | 19867928 | 5 | 0.558568 |
| rs3208305     | LPL     | 8 | 19867928 | 2 | 0.891428 |
| rs3208305     | LPL     | 8 | 19867928 | 4 | 0.046821 |
| rs15285       | LPL     | 8 | 19868947 | 5 | 0.396172 |
| rs15285       | LPL     | 8 | 19868947 | 4 | 0.222792 |
| rs15285       | LPL     | 8 | 19868947 | 1 | 0.622603 |
| rs2270637     | SLC18A1 | 8 | 20081107 | 5 | 0.603869 |
| rs2270637     | SLC18A1 | 8 | 20081107 | 3 | 1.133658 |
| rs2270637     | SLC18A1 | 8 | 20081107 | 1 | 0.434316 |
| rs2270637     | SLC18A1 | 8 | 20081107 | 6 | 0.473323 |
| rs1075        | LZTS1   | 8 | 20149265 | 3 | 0.074829 |

|               |          |   |          |   |          |
|---------------|----------|---|----------|---|----------|
| rs1075        | LZTS1    | 8 | 20149265 | 4 | 0.657388 |
| rs732338      | LZTS1    | 8 | 20150660 | 4 | 1.231077 |
| rs732338      | LZTS1    | 8 | 20150660 | 7 | 0.539596 |
| rs732338      | LZTS1    | 8 | 20150660 | 2 | 1.488075 |
| rs904002      | LZTS1    | 8 | 20151154 | 7 | 1.375592 |
| rs732337      | LZTS1    | 8 | 20151170 | 7 | 0.264427 |
| rs2306646     | XPO7     | 8 | 21902532 | 4 | 0.326256 |
| rs2306646     | XPO7     | 8 | 21902532 | 7 | 0.008739 |
| rs2306646     | XPO7     | 8 | 21902532 | 8 | 0.370141 |
| SNP8-21995513 | EPB49    | 8 | 21995513 | 4 | 5.469898 |
| SNP8-22034523 | HR       | 8 | 22034523 | 4 | 1.47731  |
| SNP8-22040710 | HR       | 8 | 22040710 | 6 | 1.338177 |
| SNP8-22040710 | HR       | 8 | 22040710 | 4 | 0.012808 |
| rs35574275    | REEP4    | 8 | 22053683 | 8 | 7.473813 |
| rs35574275    | REEP4    | 8 | 22053683 | 6 | 0.5514   |
| rs11784926    | BMP1     | 8 | 22114849 | 4 | 0.039486 |
| rs11996036    | BMP1     | 8 | 22115308 | 6 | 3.698238 |
| rs1126677     | POLR3D   | 8 | 22161447 | 8 | 1.445598 |
| rs1126677     | POLR3D   | 8 | 22161447 | 3 | 0.945313 |
| rs1126677     | POLR3D   | 8 | 22161447 | 1 | 3.811945 |
| rs1126677     | POLR3D   | 8 | 22161447 | 4 | 0.475843 |
| rs1126677     | POLR3D   | 8 | 22161447 | 5 | 0.848243 |
| rs1049437     | PPP3CC   | 8 | 22354602 | 8 | 1.633864 |
| rs1049437     | PPP3CC   | 8 | 22354602 | 4 | 0.325077 |
| rs1049437     | PPP3CC   | 8 | 22354602 | 5 | 0.647722 |
| rs7430        | PPP3CC   | 8 | 22454359 | 1 | 4.467474 |
| rs7430        | PPP3CC   | 8 | 22454359 | 6 | 6.922943 |
| rs7430        | PPP3CC   | 8 | 22454359 | 4 | 10.47275 |
| rs2449331     | SORBS3   | 8 | 22484603 | 6 | 4.062036 |
| rs3735893     | PDLIM2   | 8 | 22508649 | 1 | 1.634502 |
| rs3735893     | PDLIM2   | 8 | 22508649 | 5 | 0.822734 |
| rs11785755    | PDLIM2   | 8 | 22509168 | 1 | 1.783516 |
| rs11136091    | PDLIM2   | 8 | 22509873 | 3 | 0.275429 |
| rs3735894     | PDLIM2   | 8 | 22510771 | 1 | 2.501457 |
| rs3735894     | PDLIM2   | 8 | 22510771 | 5 | 0.546874 |
| rs7843828     | KIAA1967 | 8 | 22519568 | 1 | 2.146762 |
| rs7843828     | KIAA1967 | 8 | 22519568 | 5 | 9.226782 |
| rs3736147     | KIAA1967 | 8 | 22527769 | 1 | 5.304331 |
| rs3736147     | KIAA1967 | 8 | 22527769 | 5 | 0.004686 |
| SNP8-22582504 | BIN3     | 8 | 22582504 | 3 | 8.032344 |
| SNP8-22582504 | BIN3     | 8 | 22582504 | 6 | 4.892838 |
| rs3853        | PEBP4    | 8 | 22626789 | 1 | 2.603645 |
| rs1047406     | PEBP4    | 8 | 22626880 | 7 | 0.147889 |
| rs1047406     | PEBP4    | 8 | 22626880 | 3 | 0.251264 |
| rs1047406     | PEBP4    | 8 | 22626880 | 5 | 0.295067 |
| rs1047406     | PEBP4    | 8 | 22626880 | 1 | 0.812015 |
| rs1047406     | PEBP4    | 8 | 22626880 | 2 | 0.013413 |



|               |           |   |          |   |          |
|---------------|-----------|---|----------|---|----------|
| rs1047406     | PEBP4     | 8 | 22626880 | 4 | 0.045669 |
| rs1047398     | PEBP4     | 8 | 22626963 | 4 | 0.020172 |
| rs1047398     | PEBP4     | 8 | 22626963 | 1 | 0.170962 |
| rs1047398     | PEBP4     | 8 | 22626963 | 7 | 2.936326 |
| rs1047398     | PEBP4     | 8 | 22626963 | 5 | 0.352581 |
| rs1047398     | PEBP4     | 8 | 22626963 | 3 | 1.474395 |
| rs1129474     | PEBP4     | 8 | 22640663 | 5 | 0.532559 |
| rs1129474     | PEBP4     | 8 | 22640663 | 6 | 0.133066 |
| rs1129474     | PEBP4     | 8 | 22640663 | 4 | 1.034763 |
| rs1129474     | PEBP4     | 8 | 22640663 | 2 | 3.177847 |
| rs1047266     | TNFRSF10B | 8 | 22956646 | 8 | 7.203596 |
| rs34941234    | TNFRSF10D | 8 | 23049053 | 7 | 1.826732 |
| SNP8-23058035 | TNFRSF10D | 8 | 23058035 | 5 | 0.043725 |
| SNP8-23058035 | TNFRSF10D | 8 | 23058035 | 3 | 0.625277 |
| SNP8-23077291 | TNFRSF10D | 8 | 23077291 | 1 | 3.72176  |
| SNP8-23077291 | TNFRSF10D | 8 | 23077291 | 8 | 7.458174 |
| rs20576       | TNFRSF10A | 8 | 23114165 | 4 | 2.495361 |
| rs20576       | TNFRSF10A | 8 | 23114165 | 2 | 1.66751  |
| rs4871857     | TNFRSF10A | 8 | 23115269 | 4 | 0.719122 |
| rs6557634     | TNFRSF10A | 8 | 23116201 | 4 | 0.465734 |
| rs4563894     | CHMP7     | 8 | 23159818 | 3 | 0.660496 |
| rs4563894     | CHMP7     | 8 | 23159818 | 1 | 1.889869 |
| rs4581062     | CHMP7     | 8 | 23159856 | 3 | 0.256004 |
| rs2294123     | CHMP7     | 8 | 23160140 | 3 | 0.831172 |
| rs2294123     | CHMP7     | 8 | 23160140 | 8 | 0.918685 |
| rs12155720    | CHMP7     | 8 | 23174388 | 1 | 3.765719 |
| rs7813349     | LOXL2     | 8 | 23210545 | 5 | 0.698719 |
| rs7813349     | LOXL2     | 8 | 23210545 | 8 | 4.953985 |
| rs7813349     | LOXL2     | 8 | 23210545 | 6 | 5.774639 |
| rs7813349     | LOXL2     | 8 | 23210545 | 7 | 1.50089  |
| rs2280936     | LOXL2     | 8 | 23211282 | 5 | 0.398518 |
| rs2280936     | LOXL2     | 8 | 23211282 | 8 | 0.222681 |
| rs1051146     | LOXL2     | 8 | 23241952 | 1 | 4.563949 |
| rs1051146     | LOXL2     | 8 | 23241952 | 3 | 0.20098  |
| rs1051146     | LOXL2     | 8 | 23241952 | 8 | 0.199978 |
| rs2272641     | ENTPD4    | 8 | 23350706 | 3 | 0.541986 |
| rs3736032     | SLC25A37  | 8 | 23479642 | 2 | 4.25024  |
| rs6996616     | ADAM28    | 8 | 24226996 | 1 | 5.504597 |
| rs2291577     | ADAMDEC1  | 8 | 24312415 | 1 | 0.366908 |
| rs3765124     | ADAMDEC1  | 8 | 24317471 | 1 | 0.523965 |
| rs2709618     | DOCK5     | 8 | 25323539 | 5 | 7.861769 |
| rs2709618     | DOCK5     | 8 | 25323539 | 3 | 0.257417 |
| rs3812422     | CDCA2     | 8 | 25372578 | 8 | 1.471078 |
| rs3812422     | CDCA2     | 8 | 25372578 | 5 | 0.592467 |
| rs3812422     | CDCA2     | 8 | 25372578 | 6 | 0.293922 |
| rs3812421     | CDCA2     | 8 | 25372706 | 6 | 4.854229 |
| rs3812421     | CDCA2     | 8 | 25372706 | 5 | 0.972156 |

|            |        |   |          |   |          |
|------------|--------|---|----------|---|----------|
| rs3812421  | CDCA2  | 8 | 25372706 | 8 | 0.57232  |
| rs10866845 | EBF2   | 8 | 25764184 | 5 | 0.396803 |
| rs2197181  | PNMA2  | 8 | 26418944 | 1 | 3.253132 |
| rs2197181  | PNMA2  | 8 | 26418944 | 3 | 0.011271 |
| rs2197181  | PNMA2  | 8 | 26418944 | 6 | 0.756686 |
| rs2197181  | PNMA2  | 8 | 26418944 | 5 | 0.530049 |
| rs2233699  | PNMA2  | 8 | 26422670 | 5 | 0.342016 |
| rs2233699  | PNMA2  | 8 | 26422670 | 3 | 0.33923  |
| rs3739214  | STMN4  | 8 | 27157196 | 6 | 0.782825 |
| rs3739214  | STMN4  | 8 | 27157196 | 3 | 0.262285 |
| rs4279551  | TRIM35 | 8 | 27200649 | 4 | 0.192056 |
| rs4279551  | TRIM35 | 8 | 27200649 | 7 | 0.176196 |
| rs4279551  | TRIM35 | 8 | 27200649 | 5 | 0.159123 |
| rs6988218  | PTK2B  | 8 | 27225047 | 1 | 0.141313 |
| rs6988218  | PTK2B  | 8 | 27225047 | 2 | 2.736598 |
| rs6988218  | PTK2B  | 8 | 27225047 | 4 | 3.15166  |
| rs6988218  | PTK2B  | 8 | 27225047 | 3 | 1.920684 |
| rs6988218  | PTK2B  | 8 | 27225047 | 7 | 0.270689 |
| rs6988218  | PTK2B  | 8 | 27225047 | 6 | 0.057605 |
| rs6988218  | PTK2B  | 8 | 27225047 | 8 | 0.333889 |
| rs6988218  | PTK2B  | 8 | 27225047 | 5 | 0.258526 |
| rs2241649  | PTK2B  | 8 | 27310997 | 3 | 0.766239 |
| rs2241649  | PTK2B  | 8 | 27310997 | 7 | 1.161209 |
| rs2241649  | PTK2B  | 8 | 27310997 | 6 | 1.814946 |
| rs2241649  | PTK2B  | 8 | 27310997 | 2 | 1.031008 |
| rs2241649  | PTK2B  | 8 | 27310997 | 1 | 1.069037 |
| rs1045511  | PTK2B  | 8 | 27311063 | 7 | 5.835948 |
| rs1045511  | PTK2B  | 8 | 27311063 | 2 | 4.721864 |
| rs1045511  | PTK2B  | 8 | 27311063 | 6 | 1.08468  |
| rs1045511  | PTK2B  | 8 | 27311063 | 1 | 0.61151  |
| rs1045511  | PTK2B  | 8 | 27311063 | 3 | 9.363717 |
| rs45578935 | PTK2B  | 8 | 27357642 | 7 | 1.206471 |
| rs751019   | PTK2B  | 8 | 27364502 | 8 | 1.334172 |
| rs751019   | PTK2B  | 8 | 27364502 | 7 | 0.515068 |
| rs751019   | PTK2B  | 8 | 27364502 | 6 | 1.820634 |
| rs751019   | PTK2B  | 8 | 27364502 | 1 | 3.797734 |
| rs751019   | PTK2B  | 8 | 27364502 | 3 | 0.371135 |
| rs2292974  | CHRNA2 | 8 | 27374308 | 3 | 1.844716 |
| rs2292974  | CHRNA2 | 8 | 27374308 | 6 | 0.908488 |
| rs2292974  | CHRNA2 | 8 | 27374308 | 7 | 2.554671 |
| rs2292974  | CHRNA2 | 8 | 27374308 | 8 | 1.936549 |
| rs2292974  | CHRNA2 | 8 | 27374308 | 1 | 2.981935 |
| rs2292975  | CHRNA2 | 8 | 27374342 | 7 | 3.158539 |
| rs2292975  | CHRNA2 | 8 | 27374342 | 3 | 3.503073 |
| rs2292975  | CHRNA2 | 8 | 27374342 | 6 | 1.641496 |
| rs2292975  | CHRNA2 | 8 | 27374342 | 1 | 3.087733 |
| rs2292977  | CHRNA2 | 8 | 27374552 | 2 | 0.550091 |

|               |           |   |          |   |          |
|---------------|-----------|---|----------|---|----------|
| rs891398      | CHRNA2    | 8 | 27380739 | 4 | 1.3384   |
| rs751141      | EPHX2     | 8 | 27429782 | 8 | 6.503865 |
| rs9331947     | CLU       | 8 | 27510794 | 1 | 2.412086 |
| rs17057523    | SCARA3    | 8 | 27584365 | 3 | 0.862662 |
| rs17057523    | SCARA3    | 8 | 27584365 | 5 | 0.66028  |
| rs485609      | SCARA3    | 8 | 27586295 | 3 | 0.133403 |
| rs485609      | SCARA3    | 8 | 27586295 | 2 | 4.737588 |
| rs485609      | SCARA3    | 8 | 27586295 | 8 | 0.059159 |
| rs485609      | SCARA3    | 8 | 27586295 | 7 | 1.265585 |
| rs7842666     | CCDC25    | 8 | 27686071 | 7 | 0.163665 |
| rs7842666     | CCDC25    | 8 | 27686071 | 4 | 1.134901 |
| rs7842666     | CCDC25    | 8 | 27686071 | 5 | 0.149491 |
| rs1052874     | PBK       | 8 | 27723638 | 3 | 0.947605 |
| rs1052874     | PBK       | 8 | 27723638 | 2 | 6.916257 |
| rs1052874     | PBK       | 8 | 27723638 | 8 | 6.534574 |
| rs1052874     | PBK       | 8 | 27723638 | 7 | 0.708625 |
| rs2685390     | SCARA5    | 8 | 27906080 | 3 | 0.153434 |
| rs1046511     | ZNF395    | 8 | 28262194 | 5 | 7.616172 |
| rs1046511     | ZNF395    | 8 | 28262194 | 1 | 3.162458 |
| rs1046511     | ZNF395    | 8 | 28262194 | 7 | 0.004176 |
| rs6986672     | KIF13B    | 8 | 29061012 | 1 | 3.792399 |
| rs6986672     | KIF13B    | 8 | 29061012 | 6 | 1.014274 |
| rs13271770    | DUSP4     | 8 | 29259110 | 6 | 0.425966 |
| rs1455915     | DUSP4     | 8 | 29262045 | 8 | 0.188855 |
| rs2637819     | DUSP4     | 8 | 29263791 | 4 | 0.257278 |
| rs2637819     | DUSP4     | 8 | 29263791 | 2 | 3.918747 |
| rs7844812     | MBOAT4    | 8 | 30109106 | 6 | 0.480578 |
| rs7844812     | MBOAT4    | 8 | 30109106 | 5 | 0.906886 |
| SNP8-30822280 | TEX15     | 8 | 30822280 | 4 | 0.267812 |
| rs1800391     | WRN       | 8 | 31058246 | 7 | 0.085532 |
| rs10954782    | LOC642513 | 8 | 31196182 | 1 | 1.187192 |
| rs10954782    | LOC642513 | 8 | 31196182 | 4 | 1.018096 |
| rs11785668    | NRG1      | 8 | 32705534 | 5 | 0.266023 |
| rs16880994    | FUT10     | 8 | 33430477 | 3 | 0.064755 |
| rs10644       | RBM13     | 8 | 33477704 | 2 | 5.967345 |
| rs10644       | RBM13     | 8 | 33477704 | 5 | 1.771223 |
| rs10644       | RBM13     | 8 | 33477704 | 6 | 5.586212 |
| rs3735951     | RNF122    | 8 | 33535764 | 7 | 0.25774  |
| rs3735951     | RNF122    | 8 | 33535764 | 2 | 4.84973  |
| rs3735951     | RNF122    | 8 | 33535764 | 5 | 0.387707 |
| rs3735951     | RNF122    | 8 | 33535764 | 6 | 0.22712  |
| rs3735952     | RNF122    | 8 | 33544088 | 6 | 3.441934 |
| rs11776875    | LOC642879 | 8 | 37072804 | 4 | 0.759445 |
| rs4994        | ADRB3     | 8 | 37942955 | 5 | 1.332855 |
| rs35045158    | STAR      | 8 | 38120492 | 1 | 3.1105   |
| rs2234558     | WHSC1L1   | 8 | 38295592 | 6 | 6.207902 |
| rs3925        | FGFR1     | 8 | 38400815 | 8 | 2.108261 |

|               |          |   |          |   |          |
|---------------|----------|---|----------|---|----------|
| rs3925        | FGFR1    | 8 | 38400815 | 3 | 0.697368 |
| rs3925        | FGFR1    | 8 | 38400815 | 7 | 0.516598 |
| rs2304000     | FGFR1    | 8 | 38405968 | 7 | 0.2102   |
| rs2304000     | FGFR1    | 8 | 38405968 | 8 | 2.128108 |
| rs2304000     | FGFR1    | 8 | 38405968 | 3 | 0.047394 |
| rs4733951     | FLJ43582 | 8 | 38488988 | 5 | 0.190834 |
| SNP8-38796479 | TACC1    | 8 | 38796479 | 1 | 6.182807 |
| rs1802267     | TACC1    | 8 | 38825526 | 1 | 3.780039 |
| rs1135990     | TACC1    | 8 | 38828710 | 1 | 4.866418 |
| rs1135990     | TACC1    | 8 | 38828710 | 6 | 1.08966  |
| rs10105311    | TM2D2    | 8 | 38973198 | 6 | 1.00102  |
| rs10105311    | TM2D2    | 8 | 38973198 | 3 | 1.734968 |
| rs10105311    | TM2D2    | 8 | 38973198 | 5 | 1.075971 |
| rs10199       | C8orf4   | 8 | 40131220 | 1 | 1.620236 |
| rs753133      | ZMAT4    | 8 | 40507475 | 5 | 0.565959 |
| rs17851751    | ZMAT4    | 8 | 40557914 | 5 | 0.457086 |
| rs17851751    | ZMAT4    | 8 | 40557914 | 1 | 1.229408 |
| rs17851751    | ZMAT4    | 8 | 40557914 | 7 | 1.376834 |
| rs11337       | GOLGA7   | 8 | 41487443 | 2 | 5.487799 |
| rs508419      | ANK1     | 8 | 41642148 | 2 | 0.219181 |
| rs750625      | ANK1     | 8 | 41645071 | 2 | 4.690162 |
| rs504574      | ANK1     | 8 | 41673085 | 5 | 0.021275 |
| rs504574      | ANK1     | 8 | 41673085 | 1 | 0.042231 |
| rs2304880     | ANK1     | 8 | 41678766 | 2 | 2.493177 |
| rs2304880     | ANK1     | 8 | 41678766 | 3 | 1.656645 |
| rs2304880     | ANK1     | 8 | 41678766 | 1 | 1.231781 |
| rs2304880     | ANK1     | 8 | 41678766 | 8 | 1.303731 |
| rs2304873     | ANK1     | 8 | 41702451 | 2 | 3.079811 |
| rs2304871     | ANK1     | 8 | 41704595 | 5 | 3.013699 |
| rs2304871     | ANK1     | 8 | 41704595 | 3 | 2.736891 |
| rs3739365     | MYST3    | 8 | 41910440 | 3 | 0.205419 |
| rs7006698     | MYST3    | 8 | 42025851 | 2 | 3.013747 |
| rs7006698     | MYST3    | 8 | 42025851 | 1 | 0.06831  |
| rs7006698     | MYST3    | 8 | 42025851 | 4 | 1.084489 |
| rs1136159     | PLAT     | 8 | 42155734 | 4 | 1.467339 |
| rs1136159     | PLAT     | 8 | 42155734 | 1 | 0.966707 |
| rs6841        | SLC20A2  | 8 | 42393421 | 8 | 0.961734 |
| rs8178216     | PRKDC    | 8 | 48882397 | 4 | 1.542498 |
| rs8178046     | PRKDC    | 8 | 49004261 | 8 | 6.088364 |
| rs7827446     | PXDNL    | 8 | 52395961 | 2 | 4.869016 |
| rs2977020     | PXDNL    | 8 | 52483796 | 4 | 2.290398 |
| rs2278152     | ST18     | 8 | 53234014 | 7 | 0.249847 |
| SNP8-53749259 | RB1CC1   | 8 | 53749259 | 4 | 7.455423 |
| SNP8-53749259 | RB1CC1   | 8 | 53749259 | 8 | 5.13316  |
| SNP8-53749259 | RB1CC1   | 8 | 53749259 | 7 | 0.157944 |
| rs11992022    | OPRK1    | 8 | 54300844 | 3 | 0.294376 |
| rs7832417     | OPRK1    | 8 | 54301171 | 3 | 0.173841 |

|               |        |   |          |   |          |
|---------------|--------|---|----------|---|----------|
| rs7832417     | OPRK1  | 8 | 54301171 | 8 | 1.418505 |
| rs7832417     | OPRK1  | 8 | 54301171 | 6 | 0.503993 |
| rs16918842    | OPRK1  | 8 | 54301377 | 6 | 1.334342 |
| rs3802279     | OPRK1  | 8 | 54303501 | 6 | 0.649345 |
| rs3802279     | OPRK1  | 8 | 54303501 | 3 | 0.740425 |
| rs3802280     | OPRK1  | 8 | 54303552 | 6 | 0.22085  |
| rs3802280     | OPRK1  | 8 | 54303552 | 3 | 0.257545 |
| rs3802281     | OPRK1  | 8 | 54303716 | 3 | 1.060327 |
| rs3802282     | OPRK1  | 8 | 54303757 | 6 | 2.510038 |
| rs3802282     | OPRK1  | 8 | 54303757 | 3 | 1.016765 |
| rs963549      | OPRK1  | 8 | 54304377 | 3 | 1.974292 |
| rs963549      | OPRK1  | 8 | 54304377 | 6 | 0.592434 |
| rs702764      | OPRK1  | 8 | 54304710 | 6 | 0.519995 |
| rs702764      | OPRK1  | 8 | 54304710 | 3 | 0.04356  |
| rs7820949     | SEC11B | 8 | 55598186 | 7 | 3.456994 |
| rs7820949     | SEC11B | 8 | 55598186 | 1 | 4.145486 |
| rs7820949     | SEC11B | 8 | 55598186 | 5 | 3.724943 |
| rs7820949     | SEC11B | 8 | 55598186 | 8 | 2.424565 |
| rs444772      | RP1    | 8 | 55701610 | 2 | 4.606011 |
| rs444772      | RP1    | 8 | 55701610 | 5 | 0.121435 |
| rs2293869     | RP1    | 8 | 55701948 | 3 | 0.750357 |
| rs2293869     | RP1    | 8 | 55701948 | 1 | 0.061037 |
| rs2293869     | RP1    | 8 | 55701948 | 4 | 0.339986 |
| rs2293869     | RP1    | 8 | 55701948 | 5 | 1.841283 |
| rs2293869     | RP1    | 8 | 55701948 | 6 | 0.838001 |
| rs2293869     | RP1    | 8 | 55701948 | 2 | 0.037363 |
| rs446227      | RP1    | 8 | 55704003 | 5 | 0.44231  |
| rs446227      | RP1    | 8 | 55704003 | 2 | 2.399114 |
| rs446227      | RP1    | 8 | 55704003 | 8 | 2.471356 |
| rs441800      | RP1    | 8 | 55704170 | 8 | 0.417582 |
| rs441800      | RP1    | 8 | 55704170 | 5 | 0.051907 |
| SNP8-55705093 | RP1    | 8 | 55705093 | 3 | 0.771028 |
| SNP8-55705093 | RP1    | 8 | 55705093 | 6 | 0.420072 |
| SNP8-55705093 | RP1    | 8 | 55705093 | 4 | 0.18066  |
| SNP8-55705093 | RP1    | 8 | 55705093 | 1 | 0.561045 |
| SNP8-55705093 | RP1    | 8 | 55705093 | 5 | 4.957068 |
| rs7464499     | TMEM68 | 8 | 56839089 | 6 | 0.048354 |
| rs13276393    | TGS1   | 8 | 56848487 | 5 | 0.034347 |
| rs13276393    | TGS1   | 8 | 56848487 | 6 | 2.684452 |
| rs1818        | TGS1   | 8 | 56848778 | 5 | 5.188852 |
| rs2976047     | RPS20  | 8 | 57148368 | 6 | 3.683661 |
| rs2976047     | RPS20  | 8 | 57148368 | 3 | 0.282345 |
| rs35883156    | PLAG1  | 8 | 57241487 | 3 | 0.927999 |
| SNP8-60014461 | TOX    | 8 | 60014461 | 8 | 1.078331 |
| rs3140        | CA8    | 8 | 61264264 | 1 | 6.175226 |
| rs3140        | CA8    | 8 | 61264264 | 4 | 0.764807 |
| rs3140        | CA8    | 8 | 61264264 | 7 | 5.576098 |

|               |         |   |          |   |          |
|---------------|---------|---|----------|---|----------|
| rs6999971     | CHD7    | 8 | 61927973 | 6 | 0.730736 |
| rs4739003     | NKAIN3  | 8 | 63822189 | 1 | 0.418351 |
| rs4739003     | NKAIN3  | 8 | 63822189 | 2 | 0.321486 |
| rs4739003     | NKAIN3  | 8 | 63822189 | 7 | 0.139609 |
| rs16930023    | NULL    | 8 | 64055139 | 5 | 0.811974 |
| rs16930023    | NULL    | 8 | 64055139 | 4 | 3.425673 |
| rs11545078    | GGH     | 8 | 64101318 | 1 | 2.922189 |
| SNP8-64113866 | GGH     | 8 | 64113866 | 3 | 0.02282  |
| SNP8-64113866 | GGH     | 8 | 64113866 | 4 | 0.6552   |
| SNP8-64113866 | GGH     | 8 | 64113866 | 2 | 5.004317 |
| SNP8-64113866 | GGH     | 8 | 64113866 | 6 | 0.108323 |
| rs9650210     | BHLHB5  | 8 | 65658613 | 1 | 0.583468 |
| rs1053088     | ARMC1   | 8 | 66678337 | 4 | 1.903119 |
| rs1053088     | ARMC1   | 8 | 66678337 | 7 | 2.378813 |
| rs7011464     | PDE7A   | 8 | 66797841 | 7 | 0.668201 |
| rs7011464     | PDE7A   | 8 | 66797841 | 4 | 0.126214 |
| rs3739334     | RRS1    | 8 | 67503932 | 7 | 0.604979 |
| SNP8-67543082 | ADHFE1  | 8 | 67543082 | 8 | 1.263145 |
| SNP8-67543082 | ADHFE1  | 8 | 67543082 | 2 | 3.240024 |
| SNP8-67543082 | ADHFE1  | 8 | 67543082 | 7 | 0.412804 |
| rs12265       | ADHFE1  | 8 | 67543291 | 2 | 6.621294 |
| rs1108        | ADHFE1  | 8 | 67543417 | 8 | 1.169091 |
| rs1108        | ADHFE1  | 8 | 67543417 | 7 | 0.748227 |
| rs17332410    | C8orf45 | 8 | 67958674 | 6 | 0.213605 |
| rs4260880     | DEPDC2  | 8 | 69183050 | 1 | 1.042333 |
| rs4260880     | DEPDC2  | 8 | 69183050 | 6 | 1.857545 |
| rs4260880     | DEPDC2  | 8 | 69183050 | 5 | 1.245698 |
| rs2289831     | C8orf34 | 8 | 69596749 | 2 | 2.018174 |
| rs16935065    | C8orf34 | 8 | 69862310 | 7 | 0.032617 |
| rs13264163    | SULF1   | 8 | 70576714 | 7 | 1.143665 |
| rs3802278     | SULF1   | 8 | 70733867 | 6 | 0.730742 |
| rs3802278     | SULF1   | 8 | 70733867 | 1 | 4.59415  |
| rs6990375     | SULF1   | 8 | 70734085 | 6 | 0.138098 |
| rs6990375     | SULF1   | 8 | 70734085 | 1 | 3.309761 |
| rs10448034    | SLCO5A1 | 8 | 70751432 | 3 | 0.922532 |
| rs10448034    | SLCO5A1 | 8 | 70751432 | 7 | 1.437925 |
| rs3750266     | SLCO5A1 | 8 | 70907366 | 3 | 0.46591  |
| rs10089937    | PRDM14  | 8 | 71126953 | 4 | 0.885679 |
| rs10089937    | PRDM14  | 8 | 71126953 | 1 | 2.439875 |
| rs10089937    | PRDM14  | 8 | 71126953 | 2 | 2.406997 |
| rs10089937    | PRDM14  | 8 | 71126953 | 3 | 2.349999 |
| rs10089937    | PRDM14  | 8 | 71126953 | 5 | 2.272128 |
| rs12681420    | XKR9    | 8 | 71755752 | 4 | 2.323685 |
| rs12681420    | XKR9    | 8 | 71755752 | 3 | 2.743438 |
| rs6991329     | XKR9    | 8 | 71755979 | 8 | 2.539664 |
| rs6991329     | XKR9    | 8 | 71755979 | 4 | 3.604714 |
| rs6991329     | XKR9    | 8 | 71755979 | 3 | 2.051314 |

|               |          |   |          |   |          |
|---------------|----------|---|----------|---|----------|
| rs2290702     | XKR9     | 8 | 71809534 | 3 | 2.246223 |
| rs4738118     | EYA1     | 8 | 72291563 | 8 | 4.307797 |
| rs900126      | MSC      | 8 | 72916896 | 1 | 1.210869 |
| rs900126      | MSC      | 8 | 72916896 | 7 | 0.091933 |
| rs900126      | MSC      | 8 | 72916896 | 6 | 0.574001 |
| rs900126      | MSC      | 8 | 72916896 | 3 | 0.288833 |
| rs3779760     | MSC      | 8 | 72917193 | 5 | 0.150299 |
| rs3779760     | MSC      | 8 | 72917193 | 3 | 0.392566 |
| rs3779760     | MSC      | 8 | 72917193 | 8 | 4.746916 |
| rs3779760     | MSC      | 8 | 72917193 | 2 | 0.375349 |
| rs3779761     | MSC      | 8 | 72917302 | 7 | 0.353621 |
| rs2044270     | TRPA1    | 8 | 73096328 | 3 | 0.030079 |
| rs13280644    | TRPA1    | 8 | 73111142 | 6 | 0.858588 |
| rs13280644    | TRPA1    | 8 | 73111142 | 3 | 1.464497 |
| rs3735943     | TRPA1    | 8 | 73128556 | 7 | 3.320051 |
| rs3735943     | TRPA1    | 8 | 73128556 | 1 | 1.368635 |
| rs16937976    | TRPA1    | 8 | 73146595 | 5 | 0.411508 |
| rs16937976    | TRPA1    | 8 | 73146595 | 1 | 0.232525 |
| rs16937976    | TRPA1    | 8 | 73146595 | 6 | 1.107644 |
| rs13268757    | TRPA1    | 8 | 73150192 | 6 | 1.121466 |
| SNP8-74167685 | RPESP    | 8 | 74167685 | 5 | 6.151323 |
| SNP8-74167685 | RPESP    | 8 | 74167685 | 4 | 0.257269 |
| rs7819319     | NULL     | 8 | 74527921 | 7 | 0.137134 |
| rs7819319     | NULL     | 8 | 74527921 | 5 | 0.319304 |
| rs7819319     | NULL     | 8 | 74527921 | 4 | 0.568005 |
| rs2291217     | TMEM70   | 8 | 75057302 | 4 | 0.013692 |
| rs2291217     | TMEM70   | 8 | 75057302 | 2 | 0.350063 |
| rs2291217     | TMEM70   | 8 | 75057302 | 1 | 0.505682 |
| rs2291217     | TMEM70   | 8 | 75057302 | 6 | 2.191292 |
| rs2291217     | TMEM70   | 8 | 75057302 | 8 | 0.697189 |
| rs2291217     | TMEM70   | 8 | 75057302 | 5 | 4.121328 |
| rs7835278     | PI15     | 8 | 75928502 | 5 | 0.668489 |
| rs2085276     | CRISPLD1 | 8 | 76108405 | 3 | 0.401118 |
| rs2085276     | CRISPLD1 | 8 | 76108405 | 1 | 4.667213 |
| rs2085276     | CRISPLD1 | 8 | 76108405 | 5 | 5.213248 |
| rs13248650    | CRISPLD1 | 8 | 76109250 | 4 | 0.863702 |
| rs13248650    | CRISPLD1 | 8 | 76109250 | 7 | 0.01274  |
| rs13248650    | CRISPLD1 | 8 | 76109250 | 8 | 0.312746 |
| rs2272669     | HNF4G    | 8 | 76639012 | 4 | 0.260037 |
| rs2272669     | HNF4G    | 8 | 76639012 | 8 | 0.913259 |
| rs2272669     | HNF4G    | 8 | 76639012 | 6 | 0.553566 |
| rs2941477     | HNF4G    | 8 | 76639225 | 4 | 0.777573 |
| rs2941477     | HNF4G    | 8 | 76639225 | 6 | 1.353883 |
| rs2941478     | HNF4G    | 8 | 76639292 | 2 | 1.251747 |
| rs2941478     | HNF4G    | 8 | 76639292 | 1 | 0.715608 |
| rs2941478     | HNF4G    | 8 | 76639292 | 5 | 0.306609 |
| rs2941479     | HNF4G    | 8 | 76639514 | 7 | 0.031019 |

|               |           |   |          |   |          |
|---------------|-----------|---|----------|---|----------|
| rs2941479     | HNF4G     | 8 | 76639514 | 8 | 0.60387  |
| rs2941480     | HNF4G     | 8 | 76639677 | 7 | 0.615302 |
| rs2941480     | HNF4G     | 8 | 76639677 | 8 | 1.549879 |
| rs2941480     | HNF4G     | 8 | 76639677 | 2 | 4.187472 |
| rs2941481     | HNF4G     | 8 | 76639923 | 6 | 2.874902 |
| rs2941481     | HNF4G     | 8 | 76639923 | 8 | 3.371664 |
| rs2941481     | HNF4G     | 8 | 76639923 | 4 | 0.136316 |
| rs17306807    | HNF4G     | 8 | 76640084 | 4 | 0.274853 |
| rs17306807    | HNF4G     | 8 | 76640084 | 6 | 1.462865 |
| rs2941482     | HNF4G     | 8 | 76640550 | 6 | 1.159574 |
| rs2941483     | HNF4G     | 8 | 76641171 | 7 | 0.269566 |
| rs2941484     | HNF4G     | 8 | 76641323 | 4 | 0.0606   |
| rs2941484     | HNF4G     | 8 | 76641323 | 2 | 1.877497 |
| SNP8-77779074 | ZFHX4     | 8 | 77779074 | 6 | 5.752803 |
| SNP8-77779074 | ZFHX4     | 8 | 77779074 | 3 | 0.511157 |
| rs2728455     | ZFHX4     | 8 | 77928420 | 6 | 0.975251 |
| rs2728455     | ZFHX4     | 8 | 77928420 | 2 | 1.974922 |
| rs2728455     | ZFHX4     | 8 | 77928420 | 5 | 0.014512 |
| rs2728455     | ZFHX4     | 8 | 77928420 | 7 | 1.194703 |
| rs1046472     | HEY1      | 8 | 80839084 | 4 | 1.04793  |
| SNP8-81104896 | MRPS28    | 8 | 81104896 | 4 | 4.526748 |
| rs7464898     | LOC646437 | 8 | 81652979 | 7 | 0.582904 |
| rs7464898     | LOC646437 | 8 | 81652979 | 1 | 1.351205 |
| rs10755966    | ZNF704    | 8 | 81714207 | 3 | 0.27354  |
| rs10755966    | ZNF704    | 8 | 81714207 | 8 | 0.852601 |
| rs10755966    | ZNF704    | 8 | 81714207 | 2 | 1.782414 |
| rs11743       | PAG1      | 8 | 82042651 | 5 | 1.766558 |
| rs3739342     | PAG1      | 8 | 82045405 | 8 | 0.152376 |
| rs1445560     | PAG1      | 8 | 82047632 | 4 | 0.166919 |
| rs7017984     | PAG1      | 8 | 82049241 | 2 | 2.339281 |
| rs2016465     | PAG1      | 8 | 82067952 | 6 | 0.857932 |
| rs2167255     | PMP2      | 8 | 82515633 | 6 | 2.698261 |
| rs2167255     | PMP2      | 8 | 82515633 | 3 | 4.605055 |
| rs10113055    | PMP2      | 8 | 82516711 | 1 | 2.880318 |
| rs6473276     | PMP2      | 8 | 82518176 | 3 | 1.628282 |
| rs2229015     | PMP2      | 8 | 82519667 | 3 | 0.649292 |
| SNP8-82833326 | CHMP4C    | 8 | 82833326 | 7 | 1.74708  |
| rs13267859    | RALYL     | 8 | 85995723 | 7 | 0.062219 |
| rs12604       | RALYL     | 8 | 85996372 | 8 | 3.5567   |
| rs2072696     | CA3       | 8 | 86538303 | 4 | 0.956914 |
| rs2072696     | CA3       | 8 | 86538303 | 2 | 3.397774 |
| rs2072696     | CA3       | 8 | 86538303 | 7 | 0.304179 |
| rs16876805    | PSKH2     | 8 | 87129959 | 4 | 0.475139 |
| rs6998760     | PSKH2     | 8 | 87145636 | 6 | 1.09295  |
| rs6998760     | PSKH2     | 8 | 87145636 | 5 | 0.256772 |
| rs6983781     | ATP6V0D2  | 8 | 87235512 | 5 | 0.883513 |
| rs6983781     | ATP6V0D2  | 8 | 87235512 | 1 | 1.716919 |



|               |          |   |          |   |          |
|---------------|----------|---|----------|---|----------|
| SNP8-87590010 | FAM82B   | 8 | 87590010 | 3 | 0.815908 |
| SNP8-87590010 | FAM82B   | 8 | 87590010 | 6 | 4.404978 |
| rs990192      | CNGB3    | 8 | 87655509 | 5 | 2.743769 |
| rs17683284    | CNGB3    | 8 | 87655845 | 3 | 0.651343 |
| rs6471482     | CNGB3    | 8 | 87748419 | 3 | 0.098895 |
| rs1805794     | NBN      | 8 | 91059655 | 1 | 5.95845  |
| rs1055146     | NECAB1   | 8 | 92038845 | 1 | 3.286178 |
| rs1055146     | NECAB1   | 8 | 92038845 | 5 | 0.914642 |
| rs10109254    | SLC26A7  | 8 | 92433276 | 1 | 3.141233 |
| rs16912814    | SLC26A7  | 8 | 92477506 | 7 | 0.27312  |
| rs4734031     | SLC26A7  | 8 | 92478223 | 7 | 0.351432 |
| rs4734032     | SLC26A7  | 8 | 92478246 | 7 | 0.132266 |
| rs16916191    | RBM12B   | 8 | 94818741 | 2 | 1.783832 |
| rs16916191    | RBM12B   | 8 | 94818741 | 7 | 0.433139 |
| rs2513797     | CDH17    | 8 | 95212314 | 1 | 2.236493 |
| rs2513797     | CDH17    | 8 | 95212314 | 7 | 0.420256 |
| rs2513797     | CDH17    | 8 | 95212314 | 5 | 0.784859 |
| rs1051624     | CDH17    | 8 | 95212348 | 1 | 2.471249 |
| rs2251734     | CDH17    | 8 | 95227435 | 1 | 2.586688 |
| rs2251741     | CDH17    | 8 | 95227558 | 1 | 1.701805 |
| SNP8-95258026 | CDH17    | 8 | 95258026 | 2 | 2.590622 |
| SNP8-95258026 | CDH17    | 8 | 95258026 | 7 | 0.990325 |
| SNP8-95258026 | CDH17    | 8 | 95258026 | 3 | 0.744671 |
| SNP8-95258026 | CDH17    | 8 | 95258026 | 6 | 0.116292 |
| rs2623167     | GEM      | 8 | 95330858 | 6 | 2.24304  |
| rs2623167     | GEM      | 8 | 95330858 | 2 | 2.118246 |
| rs1050627     | GEM      | 8 | 95330869 | 5 | 0.273521 |
| rs1050627     | GEM      | 8 | 95330869 | 1 | 0.207952 |
| rs1050627     | GEM      | 8 | 95330869 | 6 | 0.916322 |
| rs1050627     | GEM      | 8 | 95330869 | 3 | 0.301931 |
| rs1050627     | GEM      | 8 | 95330869 | 2 | 1.177244 |
| rs1050627     | GEM      | 8 | 95330869 | 7 | 0.850411 |
| rs11985       | GEM      | 8 | 95330892 | 1 | 3.97917  |
| rs17036       | GEM      | 8 | 95331131 | 1 | 4.908241 |
| rs2170363     | GEM      | 8 | 95341781 | 3 | 0.634423 |
| rs2170363     | GEM      | 8 | 95341781 | 7 | 0.585184 |
| rs2250208     | GEM      | 8 | 95343533 | 1 | 3.547743 |
| rs2250208     | GEM      | 8 | 95343533 | 6 | 0.622101 |
| rs2250208     | GEM      | 8 | 95343533 | 5 | 0.046177 |
| rs2250208     | GEM      | 8 | 95343533 | 3 | 0.676301 |
| rs957448      | KIAA1429 | 8 | 95610478 | 5 | 0.591526 |
| rs957446      | KIAA1429 | 8 | 95610547 | 8 | 0.121398 |
| rs957446      | KIAA1429 | 8 | 95610547 | 7 | 0.004634 |
| rs957446      | KIAA1429 | 8 | 95610547 | 1 | 0.141789 |
| rs957446      | KIAA1429 | 8 | 95610547 | 5 | 0.172496 |
| rs957446      | KIAA1429 | 8 | 95610547 | 6 | 0.899444 |
| rs957446      | KIAA1429 | 8 | 95610547 | 2 | 0.742026 |

|                |           |   |           |   |          |
|----------------|-----------|---|-----------|---|----------|
| rs880938       | SDC2      | 8 | 97575549  | 8 | 5.323067 |
| rs3816208      | SDC2      | 8 | 97683801  | 3 | 3.076951 |
| rs2635164      | TSPYL5    | 8 | 98358890  | 2 | 0.54762  |
| rs2635164      | TSPYL5    | 8 | 98358890  | 6 | 0.247757 |
| rs2635164      | TSPYL5    | 8 | 98358890  | 1 | 0.594612 |
| rs2635164      | TSPYL5    | 8 | 98358890  | 7 | 0.039295 |
| rs2290470      | MATN2     | 8 | 99012622  | 8 | 1.571306 |
| rs2290470      | MATN2     | 8 | 99012622  | 6 | 1.520854 |
| rs2290470      | MATN2     | 8 | 99012622  | 4 | 0.901803 |
| rs2290470      | MATN2     | 8 | 99012622  | 7 | 0.067631 |
| rs35407519     | MATN2     | 8 | 99023284  | 4 | 0.522342 |
| rs35407519     | MATN2     | 8 | 99023284  | 5 | 0.737218 |
| rs1869608      | MATN2     | 8 | 99060399  | 4 | 0.844392 |
| rs1869608      | MATN2     | 8 | 99060399  | 5 | 0.24278  |
| rs2255317      | MATN2     | 8 | 99113704  | 2 | 4.015294 |
| rs4735538      | NPAL2     | 8 | 99273942  | 7 | 1.181313 |
| rs3802197      | KCNS2     | 8 | 99511080  | 1 | 3.745246 |
| rs3802197      | KCNS2     | 8 | 99511080  | 4 | 1.000695 |
| SNP8-100513061 | VPS13B    | 8 | 100513061 | 3 | 0.499371 |
| rs6468694      | VPS13B    | 8 | 100935012 | 1 | 5.746871 |
| rs4518636      | COX6C     | 8 | 100973453 | 1 | 3.602454 |
| rs7841915      | RGS22     | 8 | 101059353 | 7 | 1.407398 |
| rs2446917      | FBXO43    | 8 | 101214885 | 5 | 5.531954 |
| rs1460934      | FBXO43    | 8 | 101222200 | 6 | 1.559196 |
| rs1460934      | FBXO43    | 8 | 101222200 | 5 | 0.381846 |
| rs17335870     | SPAG1     | 8 | 101275567 | 6 | 0.852861 |
| rs17335870     | SPAG1     | 8 | 101275567 | 8 | 0.512125 |
| rs2022923      | MGC39715  | 8 | 101655309 | 4 | 0.507126 |
| rs2022923      | MGC39715  | 8 | 101655309 | 1 | 1.730487 |
| rs2022923      | MGC39715  | 8 | 101655309 | 3 | 2.165215 |
| rs3824090      | GRHL2     | 8 | 102748392 | 7 | 0.086825 |
| rs3824090      | GRHL2     | 8 | 102748392 | 4 | 5.874889 |
| rs3735715      | GRHL2     | 8 | 102749085 | 3 | 0.276649 |
| rs3735715      | GRHL2     | 8 | 102749085 | 4 | 2.819827 |
| rs3735715      | GRHL2     | 8 | 102749085 | 1 | 4.932859 |
| rs3735715      | GRHL2     | 8 | 102749085 | 7 | 1.633271 |
| rs6468783      | GRHL2     | 8 | 102750936 | 1 | 3.356691 |
| rs16868201     | NCALD     | 8 | 102769812 | 4 | 0.335487 |
| rs16868201     | NCALD     | 8 | 102769812 | 7 | 0.369122 |
| rs1265116      | RRM2B     | 8 | 103288049 | 6 | 0.697389 |
| rs1265116      | RRM2B     | 8 | 103288049 | 8 | 3.819268 |
| rs3808357      | ODF1      | 8 | 103633083 | 6 | 2.80973  |
| rs3808357      | ODF1      | 8 | 103633083 | 1 | 4.166613 |
| rs3808357      | ODF1      | 8 | 103633083 | 5 | 3.571724 |
| rs2304347      | AZIN1     | 8 | 103914548 | 7 | 0.427409 |
| rs1802539      | AZIN1     | 8 | 103945359 | 2 | 6.150192 |
| rs2454042      | LOC643972 | 8 | 104102681 | 2 | 1.667529 |

|            |           |   |           |   |          |
|------------|-----------|---|-----------|---|----------|
| rs4734684  | ATP6V1C1  | 8 | 104151587 | 1 | 4.480156 |
| rs4734684  | ATP6V1C1  | 8 | 104151587 | 3 | 0.314357 |
| rs2453994  | ATP6V1C1  | 8 | 104152827 | 1 | 6.571431 |
| rs2453994  | ATP6V1C1  | 8 | 104152827 | 4 | 0.172132 |
| rs16870033 | ATP6V1C1  | 8 | 104152962 | 5 | 0.078493 |
| rs16870033 | ATP6V1C1  | 8 | 104152962 | 4 | 1.345103 |
| rs16870033 | ATP6V1C1  | 8 | 104152962 | 6 | 0.857252 |
| rs16870033 | ATP6V1C1  | 8 | 104152962 | 1 | 6.055816 |
| rs16870270 | BAALC     | 8 | 104310942 | 1 | 4.017399 |
| rs3098233  | CTHRC1    | 8 | 104463920 | 2 | 2.717926 |
| rs3098233  | CTHRC1    | 8 | 104463920 | 3 | 0.560343 |
| rs17803441 | SLC25A32  | 8 | 104486221 | 3 | 0.381492 |
| rs3134295  | WDSOF1    | 8 | 104496535 | 7 | 0.150002 |
| rs3134295  | WDSOF1    | 8 | 104496535 | 2 | 1.751614 |
| rs3134295  | WDSOF1    | 8 | 104496535 | 3 | 0.09818  |
| rs3134295  | WDSOF1    | 8 | 104496535 | 5 | 0.168148 |
| rs3134295  | WDSOF1    | 8 | 104496535 | 6 | 0.390212 |
| rs3134295  | WDSOF1    | 8 | 104496535 | 1 | 0.363645 |
| rs3134296  | WDSOF1    | 8 | 104496717 | 2 | 2.148039 |
| rs10461    | RIMS2     | 8 | 105333155 | 7 | 0.054077 |
| rs10461    | RIMS2     | 8 | 105333155 | 8 | 3.220354 |
| rs1060441  | RIMS2     | 8 | 105333792 | 7 | 0.879753 |
| rs1060441  | RIMS2     | 8 | 105333792 | 5 | 0.490338 |
| rs1060441  | RIMS2     | 8 | 105333792 | 6 | 1.270938 |
| rs1060441  | RIMS2     | 8 | 105333792 | 4 | 1.064136 |
| rs1060441  | RIMS2     | 8 | 105333792 | 2 | 3.489857 |
| rs13279448 | LRP12     | 8 | 105570989 | 2 | 4.561985 |
| rs3134127  | LOC643319 | 8 | 107779021 | 3 | 3.698668 |
| rs3134127  | LOC643319 | 8 | 107779021 | 1 | 2.639265 |
| rs3134127  | LOC643319 | 8 | 107779021 | 2 | 4.593234 |
| rs11996457 | ABRA      | 8 | 107851511 | 3 | 0.728296 |
| rs11996457 | ABRA      | 8 | 107851511 | 6 | 0.999108 |
| rs11996466 | ABRA      | 8 | 107851571 | 3 | 0.194159 |
| rs11996466 | ABRA      | 8 | 107851571 | 6 | 1.11216  |
| rs2507800  | ANGPT1    | 8 | 108331845 | 1 | 2.973823 |
| rs2507800  | ANGPT1    | 8 | 108331845 | 5 | 0.15514  |
| rs2507800  | ANGPT1    | 8 | 108331845 | 3 | 0.147505 |
| rs1954727  | ANGPT1    | 8 | 108332310 | 1 | 3.670195 |
| rs1954727  | ANGPT1    | 8 | 108332310 | 3 | 0.228358 |
| rs1954727  | ANGPT1    | 8 | 108332310 | 8 | 3.375007 |
| rs1548083  | NUDCD1    | 8 | 110323055 | 6 | 0.117661 |
| rs1548083  | NUDCD1    | 8 | 110323055 | 8 | 5.023253 |
| rs1548083  | NUDCD1    | 8 | 110323055 | 3 | 0.029404 |
| rs1548083  | NUDCD1    | 8 | 110323055 | 7 | 4.617231 |
| rs1548083  | NUDCD1    | 8 | 110323055 | 1 | 5.277639 |
| rs1548083  | NUDCD1    | 8 | 110323055 | 5 | 0.064176 |
| rs1379369  | PKHD1L1   | 8 | 110481695 | 8 | 2.492998 |

|            |         |   |           |   |          |
|------------|---------|---|-----------|---|----------|
| rs1379369  | PKHD1L1 | 8 | 110481695 | 3 | 2.75327  |
| rs1379369  | PKHD1L1 | 8 | 110481695 | 6 | 1.995403 |
| rs1379369  | PKHD1L1 | 8 | 110481695 | 1 | 3.046196 |
| rs13252234 | PKHD1L1 | 8 | 110489605 | 3 | 3.597381 |
| rs10093885 | PKHD1L1 | 8 | 110517811 | 6 | 3.061454 |
| rs1673404  | PKHD1L1 | 8 | 110534236 | 6 | 1.986614 |
| rs1673404  | PKHD1L1 | 8 | 110534236 | 3 | 0.162697 |
| rs1673398  | PKHD1L1 | 8 | 110546169 | 3 | 1.202326 |
| rs1783174  | PKHD1L1 | 8 | 110608362 | 5 | 0.70665  |
| rs1895013  | CSMD3   | 8 | 113304905 | 2 | 3.074133 |
| rs1895013  | CSMD3   | 8 | 113304905 | 4 | 1.243325 |
| rs17629268 | CSMD3   | 8 | 113304918 | 4 | 0.63453  |
| rs4876458  | CSMD3   | 8 | 113306221 | 7 | 3.034608 |
| rs4876458  | CSMD3   | 8 | 113306221 | 8 | 0.08897  |
| rs11778209 | CSMD3   | 8 | 113433872 | 1 | 3.322416 |
| rs11778209 | CSMD3   | 8 | 113433872 | 4 | 2.571334 |
| rs11778209 | CSMD3   | 8 | 113433872 | 3 | 0.330195 |
| rs12155677 | CSMD3   | 8 | 113554111 | 7 | 0.24206  |
| rs17608189 | CSMD3   | 8 | 114360001 | 1 | 5.973108 |
| rs16884568 | CSMD3   | 8 | 114458524 | 5 | 2.22532  |
| rs13266634 | SLC30A8 | 8 | 118253964 | 3 | 0.379887 |
| rs3802177  | SLC30A8 | 8 | 118254206 | 3 | 0.958204 |
| rs3802177  | SLC30A8 | 8 | 118254206 | 7 | 4.269674 |
| rs3802177  | SLC30A8 | 8 | 118254206 | 5 | 2.699185 |
| rs3802177  | SLC30A8 | 8 | 118254206 | 6 | 2.382108 |
| rs2466294  | SLC30A8 | 8 | 118254244 | 5 | 3.426318 |
| rs2466294  | SLC30A8 | 8 | 118254244 | 3 | 0.240762 |
| rs2466294  | SLC30A8 | 8 | 118254244 | 7 | 5.312917 |
| rs2466294  | SLC30A8 | 8 | 118254244 | 6 | 2.531344 |
| rs11558471 | SLC30A8 | 8 | 118254914 | 7 | 4.952926 |
| rs11558471 | SLC30A8 | 8 | 118254914 | 6 | 1.433247 |
| rs11558471 | SLC30A8 | 8 | 118254914 | 5 | 3.235866 |
| rs11558471 | SLC30A8 | 8 | 118254914 | 3 | 0.153211 |
| rs2466293  | SLC30A8 | 8 | 118255119 | 3 | 1.465134 |
| rs2466293  | SLC30A8 | 8 | 118255119 | 2 | 2.125235 |
| rs2466293  | SLC30A8 | 8 | 118255119 | 6 | 0.655417 |
| rs2466293  | SLC30A8 | 8 | 118255119 | 7 | 4.424007 |
| rs10282940 | SLC30A8 | 8 | 118257007 | 2 | 2.787155 |
| rs17439693 | EXT1    | 8 | 118901201 | 7 | 0.515728 |
| rs17439693 | EXT1    | 8 | 118901201 | 1 | 0.565298 |
| rs17439693 | EXT1    | 8 | 118901201 | 6 | 2.079833 |
| rs17439875 | EXT1    | 8 | 118916963 | 3 | 0.791811 |
| rs17439875 | EXT1    | 8 | 118916963 | 1 | 3.16683  |
| rs11992702 | SAMD12  | 8 | 119460458 | 7 | 0.129342 |
| rs11992702 | SAMD12  | 8 | 119460458 | 8 | 0.129779 |
| rs11992702 | SAMD12  | 8 | 119460458 | 3 | 0.747646 |
| rs11992702 | SAMD12  | 8 | 119460458 | 2 | 3.706365 |

|                |           |   |           |   |          |
|----------------|-----------|---|-----------|---|----------|
| rs11992702     | SAMD12    | 8 | 119460458 | 5 | 0.008894 |
| rs11992702     | SAMD12    | 8 | 119460458 | 6 | 6.460093 |
| rs5020517      | SAMD12    | 8 | 119460972 | 5 | 0.124502 |
| rs5020517      | SAMD12    | 8 | 119460972 | 2 | 5.040233 |
| rs5020517      | SAMD12    | 8 | 119460972 | 3 | 0.638503 |
| rs2073617      | TNFRSF11B | 8 | 120033464 | 4 | 0.427671 |
| rs2073617      | TNFRSF11B | 8 | 120033464 | 1 | 4.381981 |
| rs2073617      | TNFRSF11B | 8 | 120033464 | 3 | 0.380834 |
| rs2073617      | TNFRSF11B | 8 | 120033464 | 8 | 0.795883 |
| rs17787689     | MAL2      | 8 | 120326285 | 4 | 7.388267 |
| rs2279112      | NOV       | 8 | 120498205 | 8 | 2.722102 |
| rs2279112      | NOV       | 8 | 120498205 | 2 | 0.805024 |
| rs14324        | NOV       | 8 | 120505667 | 2 | 6.107021 |
| rs14324        | NOV       | 8 | 120505667 | 3 | 0.934936 |
| rs14324        | NOV       | 8 | 120505667 | 8 | 0.772007 |
| rs11526        | NOV       | 8 | 120505722 | 8 | 0.86985  |
| rs11526        | NOV       | 8 | 120505722 | 2 | 2.873238 |
| rs2305129      | ENPP2     | 8 | 120639058 | 3 | 1.040653 |
| rs4871364      | ENPP2     | 8 | 120663983 | 2 | 3.789802 |
| rs4871364      | ENPP2     | 8 | 120663983 | 5 | 0.83626  |
| rs10283100     | ENPP2     | 8 | 120665204 | 8 | 1.1642   |
| rs10283100     | ENPP2     | 8 | 120665204 | 7 | 2.562642 |
| rs956749       | TAF2      | 8 | 120813580 | 5 | 6.572453 |
| rs1055133      | DCC1      | 8 | 120916259 | 5 | 0.048113 |
| rs1055133      | DCC1      | 8 | 120916259 | 4 | 0.245564 |
| rs1055133      | DCC1      | 8 | 120916259 | 7 | 1.1528   |
| rs1055133      | DCC1      | 8 | 120916259 | 1 | 6.340328 |
| SNP8-121131060 | DEPDC6    | 8 | 121131060 | 5 | 0.52643  |
| SNP8-121131060 | DEPDC6    | 8 | 121131060 | 3 | 0.140294 |
| SNP8-121131060 | DEPDC6    | 8 | 121131060 | 7 | 0.319144 |
| rs17833992     | COL14A1   | 8 | 121367337 | 4 | 0.316347 |
| rs17833992     | COL14A1   | 8 | 121367337 | 2 | 3.600509 |
| rs17833992     | COL14A1   | 8 | 121367337 | 1 | 0.218857 |
| rs12548759     | ZHX2      | 8 | 124035295 | 3 | 0.33528  |
| rs3802265      | ZHX2      | 8 | 124035340 | 3 | 0.206902 |
| rs3802265      | ZHX2      | 8 | 124035340 | 6 | 0.23319  |
| rs3802265      | ZHX2      | 8 | 124035340 | 8 | 1.24866  |
| rs2272722      | DERL1     | 8 | 124100722 | 4 | 0.005853 |
| rs2272722      | DERL1     | 8 | 124100722 | 5 | 0.259463 |
| rs16898013     | WDR67     | 8 | 124208072 | 3 | 0.053698 |
| rs16898013     | WDR67     | 8 | 124208072 | 8 | 5.558989 |
| rs3739291      | FAM83A    | 8 | 124264149 | 2 | 2.388606 |
| rs3739291      | FAM83A    | 8 | 124264149 | 4 | 0.191561 |
| rs3739291      | FAM83A    | 8 | 124264149 | 7 | 0.829419 |
| SNP8-124290904 | FAM83A    | 8 | 124290904 | 8 | 5.839843 |
| rs6470147      | C8orf32   | 8 | 124517985 | 3 | 0.060933 |
| rs6470147      | C8orf32   | 8 | 124517985 | 7 | 1.239761 |

|                |          |   |           |   |          |
|----------------|----------|---|-----------|---|----------|
| rs6470147      | C8orf32  | 8 | 124517985 | 1 | 6.115551 |
| rs6470147      | C8orf32  | 8 | 124517985 | 4 | 0.215512 |
| rs4871385      | FBXO32   | 8 | 124622403 | 4 | 6.121065 |
| rs4871385      | FBXO32   | 8 | 124622403 | 2 | 2.80106  |
| rs16898671     | C8ORFK36 | 8 | 124727391 | 1 | 5.503013 |
| rs16898671     | C8ORFK36 | 8 | 124727391 | 7 | 0.611503 |
| rs16898671     | C8ORFK36 | 8 | 124727391 | 4 | 0.012985 |
| rs16898671     | C8ORFK36 | 8 | 124727391 | 6 | 1.034648 |
| rs11779866     | C8ORFK36 | 8 | 124727395 | 3 | 1.069699 |
| rs16898689     | C8ORFK36 | 8 | 124733076 | 8 | 3.059157 |
| rs16898691     | C8ORFK36 | 8 | 124733168 | 8 | 1.024484 |
| rs4471017      | ANXA13   | 8 | 124762591 | 1 | 3.946914 |
| rs4471017      | ANXA13   | 8 | 124762591 | 3 | 3.952818 |
| rs2294013      | ANXA13   | 8 | 124779910 | 5 | 1.385881 |
| rs2294013      | ANXA13   | 8 | 124779910 | 1 | 0.074803 |
| rs2294013      | ANXA13   | 8 | 124779910 | 4 | 0.426532 |
| rs2294013      | ANXA13   | 8 | 124779910 | 2 | 0.040595 |
| rs6470179      | ANXA13   | 8 | 124818791 | 5 | 0.351786 |
| rs2272684      | FAM91A1  | 8 | 124887628 | 3 | 0.104352 |
| rs2272684      | FAM91A1  | 8 | 124887628 | 6 | 1.048842 |
| rs1897318      | FER1L6   | 8 | 124933585 | 3 | 0.391239 |
| SNP8-125037424 | FER1L6   | 8 | 125037424 | 3 | 1.084456 |
| rs7465584      | FER1L6   | 8 | 125056659 | 8 | 1.690644 |
| rs7465584      | FER1L6   | 8 | 125056659 | 1 | 0.906416 |
| rs7465584      | FER1L6   | 8 | 125056659 | 5 | 1.074476 |
| rs4358790      | FER1L6   | 8 | 125104969 | 7 | 4.002996 |
| rs4358790      | FER1L6   | 8 | 125104969 | 5 | 0.897297 |
| rs4358790      | FER1L6   | 8 | 125104969 | 1 | 3.229558 |
| rs4358790      | FER1L6   | 8 | 125104969 | 6 | 0.5813   |
| rs4870887      | FER1L6   | 8 | 125131076 | 8 | 2.076994 |
| rs4870887      | FER1L6   | 8 | 125131076 | 7 | 1.447384 |
| rs4483140      | FER1L6   | 8 | 125141607 | 6 | 0.825717 |
| rs6470219      | FER1L6   | 8 | 125176382 | 6 | 0.074587 |
| rs3812473      | TRMT12   | 8 | 125532264 | 2 | 3.690074 |
| rs3812473      | TRMT12   | 8 | 125532264 | 7 | 0.96052  |
| rs3829033      | MTSS1    | 8 | 125633823 | 2 | 5.461551 |
| rs3829033      | MTSS1    | 8 | 125633823 | 7 | 6.657586 |
| rs10104558     | ZNF572   | 8 | 126058641 | 5 | 4.116953 |
| rs10105106     | ZNF572   | 8 | 126058830 | 5 | 0.459048 |
| rs16900167     | ZNF572   | 8 | 126058879 | 1 | 5.204756 |
| rs16900167     | ZNF572   | 8 | 126058879 | 4 | 0.607858 |
| rs10107774     | ZNF572   | 8 | 126059033 | 5 | 0.413859 |
| rs7829785      | ZNF572   | 8 | 126060039 | 5 | 0.105349 |
| SNP8-128820383 | MYC      | 8 | 128820383 | 4 | 1.444901 |
| SNP8-128820383 | MYC      | 8 | 128820383 | 1 | 3.533303 |
| rs12677518     | PVT1     | 8 | 129021490 | 2 | 4.404695 |
| rs4736529      | EFR3A    | 8 | 133092345 | 2 | 4.040414 |

|                |        |   |           |   |          |
|----------------|--------|---|-----------|---|----------|
| rs4736529      | EFR3A  | 8 | 133092345 | 3 | 0.486669 |
| rs4736529      | EFR3A  | 8 | 133092345 | 4 | 6.667648 |
| rs4736529      | EFR3A  | 8 | 133092345 | 5 | 0.184841 |
| rs8859         | EFR3A  | 8 | 133094853 | 2 | 4.608044 |
| rs11779306     | OC90   | 8 | 133116253 | 4 | 0.188164 |
| rs11779306     | OC90   | 8 | 133116253 | 1 | 0.70086  |
| rs11779306     | OC90   | 8 | 133116253 | 7 | 0.138709 |
| rs1048490      | TMEM71 | 8 | 133791463 | 5 | 0.783767 |
| rs1048490      | TMEM71 | 8 | 133791463 | 4 | 0.200166 |
| rs1048490      | TMEM71 | 8 | 133791463 | 7 | 0.744975 |
| rs180222       | TG     | 8 | 133968342 | 4 | 0.649381 |
| rs180223       | TG     | 8 | 133969434 | 3 | 0.408705 |
| rs2069550      | TG     | 8 | 133969568 | 3 | 0.293917 |
| rs2069550      | TG     | 8 | 133969568 | 8 | 0.639549 |
| rs2069550      | TG     | 8 | 133969568 | 7 | 0.24101  |
| rs2069550      | TG     | 8 | 133969568 | 6 | 0.997455 |
| rs853326       | TG     | 8 | 133979156 | 8 | 0.185757 |
| rs853326       | TG     | 8 | 133979156 | 7 | 1.005206 |
| rs853326       | TG     | 8 | 133979156 | 3 | 0.103954 |
| rs853304       | TG     | 8 | 134000930 | 3 | 0.211071 |
| rs2069561      | TG     | 8 | 134044465 | 4 | 0.55032  |
| rs2069561      | TG     | 8 | 134044465 | 7 | 0.018445 |
| SNP8-134177728 | TG     | 8 | 134177728 | 3 | 0.010846 |
| SNP8-134177728 | TG     | 8 | 134177728 | 1 | 0.591923 |
| SNP8-134177728 | TG     | 8 | 134177728 | 2 | 1.087234 |
| SNP8-134177728 | TG     | 8 | 134177728 | 4 | 0.441799 |
| SNP8-134177728 | TG     | 8 | 134177728 | 6 | 0.200079 |
| rs1133076      | TG     | 8 | 134194864 | 3 | 2.62071  |
| rs1133076      | TG     | 8 | 134194864 | 1 | 2.038875 |
| rs1133076      | TG     | 8 | 134194864 | 8 | 4.958293 |
| rs1133076      | TG     | 8 | 134194864 | 4 | 0.616228 |
| rs1133076      | TG     | 8 | 134194864 | 7 | 2.26588  |
| rs1133076      | TG     | 8 | 134194864 | 6 | 2.239331 |
| rs2294024      | TG     | 8 | 134213295 | 2 | 3.428352 |
| rs2294024      | TG     | 8 | 134213295 | 7 | 0.554961 |
| rs2294024      | TG     | 8 | 134213295 | 8 | 5.051645 |
| rs2294024      | TG     | 8 | 134213295 | 3 | 2.036323 |
| rs2294024      | TG     | 8 | 134213295 | 4 | 1.522494 |
| rs3739261      | WISP1  | 8 | 134308952 | 8 | 2.669684 |
| rs3739261      | WISP1  | 8 | 134308952 | 2 | 1.972635 |
| rs2929969      | WISP1  | 8 | 134309879 | 3 | 0.968139 |
| rs12164193     | WISP1  | 8 | 134310105 | 4 | 0.650882 |
| rs12164193     | WISP1  | 8 | 134310105 | 2 | 1.683659 |
| rs2929970      | WISP1  | 8 | 134310319 | 2 | 1.983832 |
| rs2929970      | WISP1  | 8 | 134310319 | 8 | 1.182759 |
| rs2929970      | WISP1  | 8 | 134310319 | 3 | 0.152498 |
| rs3739429      | ZFAT1  | 8 | 135593979 | 5 | 8.370706 |

|            |           |   |           |   |          |
|------------|-----------|---|-----------|---|----------|
| rs16905194 | ZFAT1     | 8 | 135679389 | 5 | 0.055611 |
| rs16905194 | ZFAT1     | 8 | 135679389 | 8 | 0.15266  |
| rs6982146  | ZFAT1     | 8 | 135680299 | 5 | 5.471214 |
| rs6982146  | ZFAT1     | 8 | 135680299 | 8 | 2.670643 |
| rs12549256 | ZFAT1     | 8 | 135680336 | 1 | 0.511572 |
| rs12549256 | ZFAT1     | 8 | 135680336 | 2 | 0.289239 |
| rs894343   | ZFAT1     | 8 | 135681777 | 5 | 4.577228 |
| rs894343   | ZFAT1     | 8 | 135681777 | 4 | 1.299756 |
| rs894343   | ZFAT1     | 8 | 135681777 | 6 | 2.194351 |
| rs4131277  | COL22A1   | 8 | 139712156 | 7 | 0.699473 |
| rs10091563 | COL22A1   | 8 | 139716444 | 7 | 0.78074  |
| rs4909444  | COL22A1   | 8 | 139770391 | 3 | 0.189272 |
| rs4909444  | COL22A1   | 8 | 139770391 | 5 | 1.746814 |
| rs199226   | NIBP      | 8 | 140812382 | 6 | 0.507037 |
| rs199226   | NIBP      | 8 | 140812382 | 1 | 0.273449 |
| rs199226   | NIBP      | 8 | 140812382 | 2 | 0.307905 |
| rs2233230  | C8orf17   | 8 | 141012685 | 6 | 0.557618 |
| rs2233230  | C8orf17   | 8 | 141012685 | 2 | 4.053087 |
| rs11166965 | NIBP      | 8 | 141332197 | 4 | 7.220378 |
| rs11166965 | NIBP      | 8 | 141332197 | 7 | 7.519614 |
| rs3735801  | NIBP      | 8 | 141530448 | 5 | 0.323973 |
| rs2231516  | LOC729563 | 8 | 141590333 | 7 | 0.146845 |
| rs2231516  | LOC729563 | 8 | 141590333 | 5 | 0.146428 |
| rs2231516  | LOC729563 | 8 | 141590333 | 3 | 0.614763 |
| rs10216653 | CHRAC1    | 8 | 141596167 | 7 | 7.287837 |
| rs10216653 | CHRAC1    | 8 | 141596167 | 2 | 5.308562 |
| rs10216653 | CHRAC1    | 8 | 141596167 | 5 | 4.40542  |
| rs10216653 | CHRAC1    | 8 | 141596167 | 6 | 5.62647  |
| rs10216653 | CHRAC1    | 8 | 141596167 | 4 | 2.891079 |
| rs10216653 | CHRAC1    | 8 | 141596167 | 3 | 0.31441  |
| rs2977461  | EIF2C2    | 8 | 141610470 | 7 | 0.274745 |
| rs2977461  | EIF2C2    | 8 | 141610470 | 4 | 5.018185 |
| rs2977461  | EIF2C2    | 8 | 141610470 | 5 | 0.479276 |
| rs7460     | PTK2      | 8 | 141738042 | 5 | 0.155563 |
| rs7460     | PTK2      | 8 | 141738042 | 4 | 0.539871 |
| rs7460     | PTK2      | 8 | 141738042 | 3 | 0.134999 |
| rs7460     | PTK2      | 8 | 141738042 | 6 | 0.616784 |
| rs2304284  | DENND3    | 8 | 142231055 | 2 | 4.706683 |
| rs2304283  | DENND3    | 8 | 142231070 | 2 | 4.984022 |
| rs1045248  | DENND3    | 8 | 142273508 | 5 | 0.103846 |
| rs1045248  | DENND3    | 8 | 142273508 | 4 | 1.846571 |
| rs1045248  | DENND3    | 8 | 142273508 | 6 | 3.588362 |
| rs3739242  | SLC45A4   | 8 | 142288992 | 8 | 0.36287  |
| rs3739242  | SLC45A4   | 8 | 142288992 | 4 | 2.63278  |
| rs3739242  | SLC45A4   | 8 | 142288992 | 3 | 0.266158 |
| rs3739238  | SLC45A4   | 8 | 142291627 | 3 | 1.064383 |
| rs3739238  | SLC45A4   | 8 | 142291627 | 4 | 1.948492 |



|            |          |   |           |   |          |
|------------|----------|---|-----------|---|----------|
| rs3739238  | SLC45A4  | 8 | 142291627 | 5 | 0.844344 |
| rs2748421  | FLJ43860 | 8 | 142586404 | 7 | 2.844028 |
| rs10100935 | TSNARE1  | 8 | 143423627 | 8 | 2.870647 |
| rs10100935 | TSNARE1  | 8 | 143423627 | 5 | 0.737349 |
| rs10100935 | TSNARE1  | 8 | 143423627 | 1 | 0.653286 |
| rs10100935 | TSNARE1  | 8 | 143423627 | 7 | 1.322473 |
| rs10100935 | TSNARE1  | 8 | 143423627 | 2 | 1.32801  |
| rs7814359  | TSNARE1  | 8 | 143433941 | 6 | 1.103199 |
| rs7814359  | TSNARE1  | 8 | 143433941 | 3 | 1.476342 |
| rs10097505 | ARC      | 8 | 143691186 | 3 | 0.24145  |
| rs10097505 | ARC      | 8 | 143691186 | 7 | 0.012627 |
| rs3735995  | JRK      | 8 | 143741708 | 3 | 0.00413  |
| rs750530   | JRK      | 8 | 143741933 | 5 | 0.061568 |
| rs750530   | JRK      | 8 | 143741933 | 8 | 3.616951 |
| rs750530   | JRK      | 8 | 143741933 | 4 | 6.189205 |
| rs2976399  | JRK      | 8 | 143743052 | 3 | 0.0175   |
| rs2976399  | JRK      | 8 | 143743052 | 4 | 1.942222 |
| rs2976399  | JRK      | 8 | 143743052 | 5 | 2.700096 |
| rs3802234  | JRK      | 8 | 143743367 | 7 | 1.341885 |
| rs754957   | JRK      | 8 | 143743418 | 7 | 0.411689 |
| rs754957   | JRK      | 8 | 143743418 | 8 | 0.107895 |
| rs754957   | JRK      | 8 | 143743418 | 5 | 0.957991 |
| rs3802232  | JRK      | 8 | 143743703 | 5 | 0.208328 |
| rs3802232  | JRK      | 8 | 143743703 | 7 | 0.99367  |
| rs3802232  | JRK      | 8 | 143743703 | 8 | 0.392074 |
| rs2978973  | JRK      | 8 | 143744273 | 5 | 4.469451 |
| rs2978973  | JRK      | 8 | 143744273 | 3 | 0.11924  |
| rs2978973  | JRK      | 8 | 143744273 | 8 | 5.636205 |
| rs2978973  | JRK      | 8 | 143744273 | 4 | 2.192468 |
| rs3736001  | PSCA     | 8 | 143759809 | 7 | 1.091651 |
| rs2585138  | C8orf55  | 8 | 143805953 | 4 | 0.376077 |
| rs2585138  | C8orf55  | 8 | 143805953 | 6 | 1.168689 |
| rs2585138  | C8orf55  | 8 | 143805953 | 1 | 0.410598 |
| rs2585138  | C8orf55  | 8 | 143805953 | 2 | 0.955389 |
| rs2585138  | C8orf55  | 8 | 143805953 | 8 | 0.492725 |
| rs2585138  | C8orf55  | 8 | 143805953 | 5 | 0.959341 |
| rs13362    | LYNX1    | 8 | 143849966 | 1 | 5.234575 |
| rs13362    | LYNX1    | 8 | 143849966 | 6 | 2.21627  |
| rs2572925  | LY6D     | 8 | 143864907 | 7 | 3.755792 |
| rs2572925  | LY6D     | 8 | 143864907 | 5 | 2.18801  |
| rs2572925  | LY6D     | 8 | 143864907 | 8 | 2.191851 |
| rs2572925  | LY6D     | 8 | 143864907 | 6 | 1.441361 |
| rs5303     | CYP11B1  | 8 | 143952097 | 5 | 1.190545 |
| rs5303     | CYP11B1  | 8 | 143952097 | 6 | 0.710306 |
| rs5303     | CYP11B1  | 8 | 143952097 | 1 | 2.304521 |
| rs5283     | CYP11B1  | 8 | 143957599 | 5 | 0.136294 |
| rs5283     | CYP11B1  | 8 | 143957599 | 1 | 0.453617 |

|                |           |   |           |   |          |
|----------------|-----------|---|-----------|---|----------|
| rs5283         | CYP11B1   | 8 | 143957599 | 7 | 0.169603 |
| rs5283         | CYP11B1   | 8 | 143957599 | 3 | 0.220658 |
| rs12543416     | C8orf31   | 8 | 144192163 | 1 | 3.432395 |
| SNP8-144195984 | C8orf31   | 8 | 144195984 | 7 | 1.108187 |
| SNP8-144195984 | C8orf31   | 8 | 144195984 | 1 | 3.941125 |
| SNP8-144195984 | C8orf31   | 8 | 144195984 | 6 | 0.451996 |
| SNP8-144195984 | C8orf31   | 8 | 144195984 | 4 | 0.398557 |
| SNP8-144195984 | C8orf31   | 8 | 144195984 | 8 | 0.575504 |
| rs13248517     | C8orf31   | 8 | 144206336 | 4 | 3.62432  |
| rs13248517     | C8orf31   | 8 | 144206336 | 8 | 5.325205 |
| rs13248517     | C8orf31   | 8 | 144206336 | 1 | 5.300499 |
| rs13248517     | C8orf31   | 8 | 144206336 | 5 | 2.336971 |
| rs13248517     | C8orf31   | 8 | 144206336 | 6 | 0.590351 |
| rs7823214      | C8orf31   | 8 | 144206344 | 8 | 0.74254  |
| rs7823214      | C8orf31   | 8 | 144206344 | 1 | 6.103526 |
| rs7823214      | C8orf31   | 8 | 144206344 | 4 | 6.576227 |
| rs7823214      | C8orf31   | 8 | 144206344 | 5 | 0.920645 |
| rs7823214      | C8orf31   | 8 | 144206344 | 6 | 1.498278 |
| rs4977119      | C8orf31   | 8 | 144206762 | 1 | 6.084457 |
| rs4977119      | C8orf31   | 8 | 144206762 | 4 | 3.110379 |
| rs4977119      | C8orf31   | 8 | 144206762 | 6 | 4.331455 |
| rs4977119      | C8orf31   | 8 | 144206762 | 5 | 2.52834  |
| rs6988480      | HHCM      | 8 | 144242199 | 3 | 0.120932 |
| rs7007949      | LY6H      | 8 | 144311035 | 5 | 1.202825 |
| rs7007949      | LY6H      | 8 | 144311035 | 3 | 0.804801 |
| GA007224       | GPIHBP1   | 8 | 144367157 | 1 | 0.783868 |
| GA007224       | GPIHBP1   | 8 | 144367157 | 2 | 3.3603   |
| GA007224       | GPIHBP1   | 8 | 144367157 | 8 | 0.830999 |
| GA007224       | GPIHBP1   | 8 | 144367157 | 5 | 0.972454 |
| rs12545739     | LOC338328 | 8 | 144369042 | 5 | 3.277635 |
| rs12545739     | LOC338328 | 8 | 144369042 | 3 | 1.735142 |
| rs12545739     | LOC338328 | 8 | 144369042 | 2 | 1.086888 |
| rs12545739     | LOC338328 | 8 | 144369042 | 1 | 3.046652 |
| rs7387879      | ZFP41     | 8 | 144400672 | 3 | 1.61918  |
| rs7387879      | ZFP41     | 8 | 144400672 | 7 | 1.232165 |
| rs7387879      | ZFP41     | 8 | 144400672 | 1 | 1.349842 |
| rs7387879      | ZFP41     | 8 | 144400672 | 4 | 0.0747   |
| rs7387879      | ZFP41     | 8 | 144400672 | 2 | 0.014099 |
| rs7387879      | ZFP41     | 8 | 144400672 | 6 | 0.187924 |
| rs3750213      | ZFP41     | 8 | 144415762 | 2 | 0.780744 |
| rs3750213      | ZFP41     | 8 | 144415762 | 5 | 2.886854 |
| rs3750213      | ZFP41     | 8 | 144415762 | 7 | 0.115327 |
| rs3750217      | ZNF696    | 8 | 144450627 | 8 | 1.038071 |
| rs3750217      | ZNF696    | 8 | 144450627 | 5 | 0.407227 |
| rs3750217      | ZNF696    | 8 | 144450627 | 6 | 2.665295 |
| rs3750217      | ZNF696    | 8 | 144450627 | 4 | 1.399935 |
| rs3750217      | ZNF696    | 8 | 144450627 | 7 | 0.212022 |

|                |         |   |           |   |          |
|----------------|---------|---|-----------|---|----------|
| SNP8-144478080 | TOP1MT  | 8 | 144478080 | 8 | 7.914945 |
| SNP8-144478080 | TOP1MT  | 8 | 144478080 | 4 | 0.144226 |
| SNP8-144478080 | TOP1MT  | 8 | 144478080 | 3 | 0.581757 |
| SNP8-144478080 | TOP1MT  | 8 | 144478080 | 6 | 9.531603 |
| rs2450772      | TOP1MT  | 8 | 144484791 | 3 | 0.189014 |
| rs2450772      | TOP1MT  | 8 | 144484791 | 1 | 1.472078 |
| rs3812440      | RHPN1   | 8 | 144533312 | 7 | 1.462064 |
| rs4874147      | ZC3H3   | 8 | 144691326 | 8 | 0.937666 |
| rs3750206      | ZC3H3   | 8 | 144692234 | 2 | 0.534101 |
| rs3750206      | ZC3H3   | 8 | 144692234 | 1 | 0.039768 |
| rs3750206      | ZC3H3   | 8 | 144692234 | 5 | 0.23213  |
| SNP8-144725392 | C8orf73 | 8 | 144725392 | 4 | 0.332335 |
| SNP8-144725392 | C8orf73 | 8 | 144725392 | 6 | 0.301414 |
| SNP8-144725392 | C8orf73 | 8 | 144725392 | 5 | 0.542725 |
| SNP8-144725392 | C8orf73 | 8 | 144725392 | 1 | 1.56688  |
| SNP8-144725392 | C8orf73 | 8 | 144725392 | 3 | 0.576476 |
| SNP8-144725392 | C8orf73 | 8 | 144725392 | 8 | 0.301167 |
| rs4873803      | C8orf73 | 8 | 144725737 | 5 | 0.343017 |
| rs4873803      | C8orf73 | 8 | 144725737 | 3 | 0.366859 |
| rs2290416      | NAPRT1  | 8 | 144728743 | 1 | 2.370367 |
| rs1062391      | EEF1D   | 8 | 144733496 | 7 | 1.425437 |
| rs1062391      | EEF1D   | 8 | 144733496 | 1 | 1.42895  |
| rs1062391      | EEF1D   | 8 | 144733496 | 6 | 1.598433 |
| rs1062391      | EEF1D   | 8 | 144733496 | 5 | 0.436116 |
| rs1062391      | EEF1D   | 8 | 144733496 | 3 | 0.131498 |
| rs3812448      | EEF1D   | 8 | 144743065 | 5 | 0.952952 |
| rs3812448      | EEF1D   | 8 | 144743065 | 7 | 0.599707 |
| rs3812448      | EEF1D   | 8 | 144743065 | 1 | 3.465515 |
| rs3812448      | EEF1D   | 8 | 144743065 | 6 | 7.062067 |
| rs3210186      | TIGD5   | 8 | 144753454 | 3 | 0.27553  |
| rs3210186      | TIGD5   | 8 | 144753454 | 6 | 1.125301 |
| rs3210186      | TIGD5   | 8 | 144753454 | 5 | 0.659459 |
| rs3210186      | TIGD5   | 8 | 144753454 | 1 | 4.829423 |
| rs3210186      | TIGD5   | 8 | 144753454 | 7 | 0.424741 |
| rs2242089      | PYCRL   | 8 | 144760289 | 5 | 0.399953 |
| rs2242089      | PYCRL   | 8 | 144760289 | 8 | 2.513625 |
| rs2242089      | PYCRL   | 8 | 144760289 | 4 | 1.247428 |
| rs2242089      | PYCRL   | 8 | 144760289 | 3 | 0.626504 |
| rs2978         | TSTA3   | 8 | 144766033 | 6 | 0.095481 |
| rs2978         | TSTA3   | 8 | 144766033 | 4 | 0.448367 |
| rs2978         | TSTA3   | 8 | 144766033 | 1 | 7.475385 |
| rs2978         | TSTA3   | 8 | 144766033 | 3 | 0.832311 |
| rs2978         | TSTA3   | 8 | 144766033 | 5 | 0.990309 |
| rs2978         | TSTA3   | 8 | 144766033 | 8 | 7.123637 |
| rs3750204      | ZNF623  | 8 | 144803593 | 5 | 0.358633 |
| rs3750204      | ZNF623  | 8 | 144803593 | 1 | 6.870106 |
| rs3204171      | ZNF707  | 8 | 144849354 | 5 | 0.129242 |

|                |          |   |           |   |          |
|----------------|----------|---|-----------|---|----------|
| rs3204171      | ZNF707   | 8 | 144849354 | 7 | 0.867357 |
| rs11136316     | ZNF707   | 8 | 144849509 | 7 | 1.938932 |
| rs11136316     | ZNF707   | 8 | 144849509 | 5 | 1.264456 |
| SNP8-144873581 | MAPK15   | 8 | 144873581 | 3 | 0.878235 |
| rs6558394      | SCRIB    | 8 | 144965072 | 3 | 3.101487 |
| rs7839934      | EPPK1    | 8 | 145013169 | 6 | 5.506662 |
| rs7839934      | EPPK1    | 8 | 145013169 | 8 | 0.166489 |
| rs12542653     | EPPK1    | 8 | 145016164 | 4 | 2.177909 |
| rs12542653     | EPPK1    | 8 | 145016164 | 8 | 0.606476 |
| SNP8-145073019 | PLEC1    | 8 | 145073019 | 1 | 4.236478 |
| SNP8-145073019 | PLEC1    | 8 | 145073019 | 3 | 0.386718 |
| rs11544989     | PARP10   | 8 | 145129856 | 1 | 1.515036 |
| rs11544989     | PARP10   | 8 | 145129856 | 4 | 0.800077 |
| rs11544989     | PARP10   | 8 | 145129856 | 5 | 1.476257 |
| rs11136344     | PARP10   | 8 | 145131413 | 5 | 1.261183 |
| rs11136344     | PARP10   | 8 | 145131413 | 7 | 0.316276 |
| rs11136344     | PARP10   | 8 | 145131413 | 1 | 3.360886 |
| rs11136345     | PARP10   | 8 | 145132100 | 8 | 0.190737 |
| rs11136345     | PARP10   | 8 | 145132100 | 7 | 0.522953 |
| rs11136345     | PARP10   | 8 | 145132100 | 5 | 0.360342 |
| rs11136345     | PARP10   | 8 | 145132100 | 4 | 0.913855 |
| rs11136345     | PARP10   | 8 | 145132100 | 1 | 3.942909 |
| rs11993554     | OPLAH    | 8 | 145183517 | 7 | 0.703527 |
| rs6558292      | OPLAH    | 8 | 145186631 | 7 | 1.072882 |
| rs4977196      | KIAA1875 | 8 | 145235402 | 7 | 0.516827 |
| SNP8-145295276 | KIAA1833 | 8 | 145295276 | 3 | 0.246475 |
| rs2272663      | C8ORFK29 | 8 | 145549104 | 7 | 1.751691 |
| rs2272663      | C8ORFK29 | 8 | 145549104 | 1 | 1.705286 |
| rs2272663      | C8ORFK29 | 8 | 145549104 | 6 | 0.141627 |
| rs6599528      | ADCK5    | 8 | 145573922 | 6 | 1.177602 |
| rs6599528      | ADCK5    | 8 | 145573922 | 2 | 3.162037 |
| rs6599528      | ADCK5    | 8 | 145573922 | 7 | 7.577289 |
| rs6599528      | ADCK5    | 8 | 145573922 | 5 | 0.685505 |
| SNP8-145610489 | SLC39A4  | 8 | 145610489 | 3 | 0.510052 |
| rs2272662      | SLC39A4  | 8 | 145610534 | 5 | 2.68014  |
| rs2272662      | SLC39A4  | 8 | 145610534 | 6 | 3.236341 |
| rs2280839      | SLC39A4  | 8 | 145612372 | 5 | 0.545025 |
| rs2280839      | SLC39A4  | 8 | 145612372 | 7 | 0.447868 |
| rs1046830      | CYHR1    | 8 | 145660058 | 4 | 5.684203 |
| rs750472       | FOXH1    | 8 | 145672261 | 4 | 1.57782  |
| rs750472       | FOXH1    | 8 | 145672261 | 5 | 0.322261 |
| rs750472       | FOXH1    | 8 | 145672261 | 3 | 1.092342 |
| rs750472       | FOXH1    | 8 | 145672261 | 2 | 3.591821 |
| rs1063739      | GPT      | 8 | 145700535 | 2 | 4.77532  |
| rs1063739      | GPT      | 8 | 145700535 | 5 | 0.603499 |
| rs1063739      | GPT      | 8 | 145700535 | 3 | 1.851469 |
| rs1063739      | GPT      | 8 | 145700535 | 4 | 0.906377 |

|                |         |   |           |   |          |
|----------------|---------|---|-----------|---|----------|
| SNP8-145708624 | RECQL4  | 8 | 145708624 | 3 | 0.773676 |
| SNP8-145708624 | RECQL4  | 8 | 145708624 | 4 | 0.629121 |
| SNP8-145708624 | RECQL4  | 8 | 145708624 | 5 | 5.925172 |
| SNP8-145712510 | RECQL4  | 8 | 145712510 | 4 | 0.247934 |
| SNP8-145712510 | RECQL4  | 8 | 145712510 | 2 | 5.113111 |
| SNP8-145712510 | RECQL4  | 8 | 145712510 | 5 | 4.897736 |
| rs2306386      | RECQL4  | 8 | 145713687 | 4 | 2.221615 |
| rs2306386      | RECQL4  | 8 | 145713687 | 2 | 2.186096 |
| rs2306386      | RECQL4  | 8 | 145713687 | 5 | 3.949452 |
| rs2306386      | RECQL4  | 8 | 145713687 | 1 | 0.228392 |
| rs2620651      | LRRC24  | 8 | 145719561 | 3 | 0.295437 |
| rs2730059      | ZNF251  | 8 | 145952565 | 3 | 1.054326 |
| rs1060859      | RPL8    | 8 | 145986553 | 3 | 0.631049 |
| rs2954658      | RPL8    | 8 | 145988586 | 4 | 4.114035 |
| rs2954658      | RPL8    | 8 | 145988586 | 7 | 0.521091 |
| rs2954658      | RPL8    | 8 | 145988586 | 1 | 4.968027 |
| rs2954658      | RPL8    | 8 | 145988586 | 5 | 0.999987 |
| rs2242650      | COMMD5  | 8 | 146037222 | 1 | 2.000726 |
| rs2242650      | COMMD5  | 8 | 146037222 | 7 | 1.150324 |
| rs2242650      | COMMD5  | 8 | 146037222 | 5 | 3.428479 |
| rs2242650      | COMMD5  | 8 | 146037222 | 4 | 1.272793 |
| rs2242650      | COMMD5  | 8 | 146037222 | 2 | 0.927677 |
| rs2236547      | C9orf66 | 9 | 204864    | 7 | 0.910556 |
| rs2236547      | C9orf66 | 9 | 204864    | 3 | 1.288805 |
| rs2236547      | C9orf66 | 9 | 204864    | 5 | 0.154355 |
| rs11789099     | DOCK8   | 9 | 302134    | 8 | 0.166338 |
| rs12348944     | DOCK8   | 9 | 367066    | 4 | 3.363222 |
| rs2297079      | DOCK8   | 9 | 411032    | 2 | 3.885871 |
| rs2297079      | DOCK8   | 9 | 411032    | 5 | 8.197984 |
| rs2297079      | DOCK8   | 9 | 411032    | 6 | 2.904754 |
| rs2297079      | DOCK8   | 9 | 411032    | 3 | 0.440708 |
| rs10491684     | DOCK8   | 9 | 439798    | 3 | 0.639689 |
| rs10491684     | DOCK8   | 9 | 439798    | 5 | 0.135823 |
| rs4465020      | ANKRD15 | 9 | 702060    | 2 | 8.056294 |
| rs912175       | ANKRD15 | 9 | 702137    | 6 | 1.165621 |
| SNP9-1045870   | DMRT2   | 9 | 1045870   | 3 | 0.870541 |
| rs17641078     | DMRT2   | 9 | 1046959   | 5 | 0.050353 |
| rs4741030      | DMRT2   | 9 | 1047351   | 3 | 0.880642 |
| rs34881325     | VLDLR   | 9 | 2612134   | 2 | 4.920065 |
| rs34881325     | VLDLR   | 9 | 2612134   | 5 | 5.314839 |
| rs34881325     | VLDLR   | 9 | 2612134   | 8 | 7.391539 |
| rs34881325     | VLDLR   | 9 | 2612134   | 4 | 1.75795  |
| rs34881325     | VLDLR   | 9 | 2612134   | 3 | 0.470912 |
| rs10967705     | KCNV2   | 9 | 2707922   | 1 | 4.463718 |
| rs10967705     | KCNV2   | 9 | 2707922   | 7 | 5.619167 |
| rs17656693     | KCNV2   | 9 | 2708588   | 3 | 2.388311 |
| rs12352254     | KCNV2   | 9 | 2719686   | 1 | 3.457624 |

|              |          |   |         |   |          |
|--------------|----------|---|---------|---|----------|
| rs41306094   | KCNV2    | 9 | 2719733 | 1 | 1.964491 |
| SNP9-2818742 | KIAA0020 | 9 | 2818742 | 4 | 0.415716 |
| SNP9-2818742 | KIAA0020 | 9 | 2818742 | 8 | 0.110478 |
| SNP9-2818742 | KIAA0020 | 9 | 2818742 | 3 | 0.597679 |
| rs17715051   | RFX3     | 9 | 3237107 | 4 | 5.892805 |
| rs17715051   | RFX3     | 9 | 3237107 | 1 | 5.038545 |
| rs2228622    | SLC1A1   | 9 | 4554432 | 3 | 0.90185  |
| rs2228622    | SLC1A1   | 9 | 4554432 | 6 | 1.616648 |
| rs2228622    | SLC1A1   | 9 | 4554432 | 5 | 0.321238 |
| SNP9-4607999 | C9orf68  | 9 | 4607999 | 5 | 1.697516 |
| rs301487     | PPAPDC2  | 9 | 4652369 | 2 | 1.501342 |
| rs301487     | PPAPDC2  | 9 | 4652369 | 5 | 0.934605 |
| rs301487     | PPAPDC2  | 9 | 4652369 | 6 | 1.233376 |
| rs301487     | PPAPDC2  | 9 | 4652369 | 1 | 1.398388 |
| rs1485202    | PPAPDC2  | 9 | 4654749 | 6 | 6.511515 |
| rs1485202    | PPAPDC2  | 9 | 4654749 | 1 | 3.483414 |
| rs1485202    | PPAPDC2  | 9 | 4654749 | 3 | 0.353596 |
| rs1485202    | PPAPDC2  | 9 | 4654749 | 5 | 8.978486 |
| rs1053872    | RCL1     | 9 | 4850643 | 8 | 6.527235 |
| rs1053872    | RCL1     | 9 | 4850643 | 5 | 0.92762  |
| rs1053872    | RCL1     | 9 | 4850643 | 1 | 0.117181 |
| rs1053872    | RCL1     | 9 | 4850643 | 3 | 0.267565 |
| rs1053872    | RCL1     | 9 | 4850643 | 2 | 1.295964 |
| rs2273782    | RLN1     | 9 | 5325470 | 4 | 0.561438 |
| rs2273782    | RLN1     | 9 | 5325470 | 3 | 0.070263 |
| rs4143815    | CD274    | 9 | 5458257 | 3 | 0.274481 |
| rs16923189   | PDCD1LG2 | 9 | 5500644 | 8 | 1.393749 |
| rs3739646    | KIAA1432 | 9 | 5752600 | 3 | 0.019027 |
| rs1056798    | MLANA    | 9 | 5899259 | 5 | 0.695964 |
| rs1056798    | MLANA    | 9 | 5899259 | 3 | 0.519738 |
| rs10975519   | IL33     | 9 | 6243571 | 7 | 1.251795 |
| rs10975519   | IL33     | 9 | 6243571 | 4 | 0.527528 |
| rs10975519   | IL33     | 9 | 6243571 | 5 | 1.834445 |
| rs10975519   | IL33     | 9 | 6243571 | 3 | 1.972909 |
| rs10975519   | IL33     | 9 | 6243571 | 1 | 4.793776 |
| rs1048274    | IL33     | 9 | 6246292 | 4 | 0.965268 |
| rs1048274    | IL33     | 9 | 6246292 | 6 | 6.449054 |
| rs1048274    | IL33     | 9 | 6246292 | 5 | 0.346801 |
| rs1048274    | IL33     | 9 | 6246292 | 3 | 1.5369   |
| rs1048274    | IL33     | 9 | 6246292 | 1 | 3.270742 |
| rs1048274    | IL33     | 9 | 6246292 | 7 | 0.38871  |
| rs8172       | IL33     | 9 | 6247898 | 1 | 5.79807  |
| rs33962342   | UHRF2    | 9 | 6496038 | 5 | 0.747163 |
| rs33962342   | UHRF2    | 9 | 6496038 | 7 | 0.336272 |
| rs7848919    | GLDC     | 9 | 6522477 | 3 | 0.063234 |
| rs7848919    | GLDC     | 9 | 6522477 | 4 | 1.193387 |
| rs7848919    | GLDC     | 9 | 6522477 | 5 | 0.706998 |

|               |           |   |          |   |          |
|---------------|-----------|---|----------|---|----------|
| rs1061407     | GLDC      | 9 | 6522544  | 1 | 2.412076 |
| rs1061407     | GLDC      | 9 | 6522544  | 5 | 2.002972 |
| rs1061407     | GLDC      | 9 | 6522544  | 3 | 1.541286 |
| rs1061407     | GLDC      | 9 | 6522544  | 7 | 1.356962 |
| rs1061407     | GLDC      | 9 | 6522544  | 8 | 1.799068 |
| rs1061407     | GLDC      | 9 | 6522544  | 4 | 1.864956 |
| rs1061407     | GLDC      | 9 | 6522544  | 6 | 1.550575 |
| rs35374927    | GLDC      | 9 | 6600326  | 5 | 1.334928 |
| rs10976088    | JMJD2C    | 9 | 7164813  | 5 | 6.280111 |
| rs10976088    | JMJD2C    | 9 | 7164813  | 4 | 0.154697 |
| rs2279776     | PTPRD     | 9 | 8379364  | 5 | 0.703316 |
| rs2279776     | PTPRD     | 9 | 8379364  | 4 | 0.592518 |
| rs2279776     | PTPRD     | 9 | 8379364  | 1 | 0.219028 |
| rs2279776     | PTPRD     | 9 | 8379364  | 7 | 1.758702 |
| rs2279776     | PTPRD     | 9 | 8379364  | 2 | 3.377404 |
| rs3763653     | PTPRD     | 9 | 8508395  | 3 | 0.675267 |
| rs683         | TYRP1     | 9 | 12699305 | 3 | 0.583344 |
| rs683         | TYRP1     | 9 | 12699305 | 1 | 2.493045 |
| rs683         | TYRP1     | 9 | 12699305 | 4 | 0.545163 |
| SNP9-12811695 | C9orf150  | 9 | 12811695 | 1 | 2.86357  |
| rs4741289     | MPDZ      | 9 | 13180163 | 4 | 3.827814 |
| rs7858        | NFIB      | 9 | 14077769 | 4 | 0.30117  |
| rs3209160     | ZDHHC21   | 9 | 14608316 | 4 | 0.874375 |
| rs10961689    | FREM1     | 9 | 14727506 | 3 | 2.239466 |
| rs4741426     | FREM1     | 9 | 14737412 | 7 | 1.726999 |
| rs10738380    | FREM1     | 9 | 14791687 | 3 | 0.768429 |
| SNP9-14791710 | FREM1     | 9 | 14791710 | 1 | 0.415637 |
| SNP9-14791710 | FREM1     | 9 | 14791710 | 3 | 1.278057 |
| rs7023244     | FREM1     | 9 | 14809370 | 3 | 1.780785 |
| rs7023244     | FREM1     | 9 | 14809370 | 1 | 0.456166 |
| rs2665515     | PSIP1     | 9 | 15454743 | 3 | 0.155592 |
| rs4741510     | C9orf93   | 9 | 15581372 | 5 | 1.025329 |
| rs2296863     | BNC2      | 9 | 16405411 | 5 | 2.214863 |
| rs2296863     | BNC2      | 9 | 16405411 | 1 | 2.626356 |
| rs2296863     | BNC2      | 9 | 16405411 | 8 | 0.579954 |
| rs2296864     | BNC2      | 9 | 16405459 | 8 | 0.197613 |
| rs2296864     | BNC2      | 9 | 16405459 | 5 | 1.310452 |
| rs3739715     | BNC2      | 9 | 16425714 | 5 | 0.968266 |
| rs3739715     | BNC2      | 9 | 16425714 | 8 | 0.365124 |
| rs3739715     | BNC2      | 9 | 16425714 | 1 | 1.15328  |
| rs7860932     | LOC648570 | 9 | 16776898 | 3 | 0.686665 |
| rs3739489     | C9orf39   | 9 | 17384996 | 4 | 0.209784 |
| rs3739489     | C9orf39   | 9 | 17384996 | 3 | 0.776922 |
| rs41304755    | ADAMTSL1  | 9 | 18819952 | 3 | 3.786835 |
| rs10117672    | NULL      | 9 | 18899703 | 8 | 0.112839 |
| rs10117672    | NULL      | 9 | 18899703 | 3 | 0.323422 |
| rs10117672    | NULL      | 9 | 18899703 | 4 | 0.858297 |

|               |           |   |          |   |          |
|---------------|-----------|---|----------|---|----------|
| rs10117672    | NULL      | 9 | 18899703 | 2 | 4.473411 |
| rs11794832    | NULL      | 9 | 18900581 | 7 | 0.209501 |
| rs7021572     | C9orf138  | 9 | 18940895 | 3 | 0.45833  |
| rs17810415    | C9orf138  | 9 | 19022907 | 1 | 0.040209 |
| rs10963922    | C9orf138  | 9 | 19023058 | 3 | 0.442491 |
| rs10511670    | FAM29A    | 9 | 19048743 | 7 | 0.889678 |
| rs10511670    | FAM29A    | 9 | 19048743 | 1 | 5.38826  |
| rs13286328    | FAM29A    | 9 | 19066673 | 3 | 0.01001  |
| rs13286328    | FAM29A    | 9 | 19066673 | 7 | 0.956218 |
| rs13286328    | FAM29A    | 9 | 19066673 | 5 | 0.501631 |
| rs13286328    | FAM29A    | 9 | 19066673 | 8 | 3.936988 |
| rs2228416     | ADFP      | 9 | 19116281 | 7 | 6.36671  |
| rs3808657     | LOC729925 | 9 | 19117877 | 7 | 0.141542 |
| rs3808657     | LOC729925 | 9 | 19117877 | 3 | 0.166911 |
| rs10964136    | ASAH3L    | 9 | 19424980 | 5 | 6.515391 |
| rs12343276    | ASAH3L    | 9 | 19441807 | 7 | 0.748414 |
| rs12349140    | LOC392288 | 9 | 19451193 | 6 | 0.653789 |
| rs12349140    | LOC392288 | 9 | 19451193 | 5 | 2.411853 |
| rs4977308     | SLC24A2   | 9 | 19612268 | 7 | 0.370969 |
| rs4977881     | KIAA1797  | 9 | 20978426 | 5 | 1.005889 |
| rs4977881     | KIAA1797  | 9 | 20978426 | 1 | 4.141045 |
| rs4977881     | KIAA1797  | 9 | 20978426 | 3 | 1.141172 |
| rs4977881     | KIAA1797  | 9 | 20978426 | 4 | 0.911412 |
| rs2298260     | PTPLAD2   | 9 | 21019330 | 3 | 1.476944 |
| rs2298260     | PTPLAD2   | 9 | 21019330 | 4 | 1.71126  |
| rs2298260     | PTPLAD2   | 9 | 21019330 | 1 | 1.442365 |
| rs10964982    | IFNA8     | 9 | 21399901 | 5 | 0.664423 |
| rs10964982    | IFNA8     | 9 | 21399901 | 1 | 1.734363 |
| rs12380505    | LOC402359 | 9 | 21685893 | 2 | 1.983698 |
| rs12380505    | LOC402359 | 9 | 21685893 | 5 | 2.404684 |
| rs12380505    | LOC402359 | 9 | 21685893 | 7 | 1.826265 |
| rs12380505    | LOC402359 | 9 | 21685893 | 1 | 3.297236 |
| rs12380505    | LOC402359 | 9 | 21685893 | 4 | 1.839579 |
| SNP9-21854378 | MTAP      | 9 | 21854378 | 8 | 8.064959 |
| SNP9-21854378 | MTAP      | 9 | 21854378 | 5 | 5.430204 |
| SNP9-21854378 | MTAP      | 9 | 21854378 | 3 | 0.000117 |
| SNP9-21854378 | MTAP      | 9 | 21854378 | 1 | 0.014395 |
| SNP9-21854378 | MTAP      | 9 | 21854378 | 2 | 5.921109 |
| SNP9-22442002 | DMRTA1    | 9 | 22442002 | 1 | 1.120759 |
| SNP9-22442002 | DMRTA1    | 9 | 22442002 | 2 | 2.48236  |
| rs1128957     | TUSC1     | 9 | 25667257 | 3 | 0.008512 |
| rs1128957     | TUSC1     | 9 | 25667257 | 5 | 0.006324 |
| rs1128957     | TUSC1     | 9 | 25667257 | 1 | 5.967599 |
| rs1128957     | TUSC1     | 9 | 25667257 | 6 | 0.57083  |
| rs10967649    | LRRC19    | 9 | 26983755 | 1 | 3.325426 |
| rs10812509    | LRRC19    | 9 | 26983889 | 1 | 3.567941 |
| rs1334811     | TEK       | 9 | 27180655 | 1 | 1.611038 |



|            |           |   |          |   |          |
|------------|-----------|---|----------|---|----------|
| rs1334811  | TEK       | 9 | 27180655 | 7 | 0.855712 |
| rs639225   | TEK       | 9 | 27192870 | 5 | 0.812554 |
| rs639225   | TEK       | 9 | 27192870 | 4 | 1.410907 |
| rs639225   | TEK       | 9 | 27192870 | 1 | 0.527932 |
| rs639225   | TEK       | 9 | 27192870 | 2 | 1.172495 |
| rs639225   | TEK       | 9 | 27192870 | 3 | 1.588765 |
| rs542913   | TEK       | 9 | 27195021 | 1 | 5.133862 |
| rs542913   | TEK       | 9 | 27195021 | 4 | 0.133703 |
| rs542913   | TEK       | 9 | 27195021 | 5 | 1.420514 |
| rs542913   | TEK       | 9 | 27195021 | 3 | 0.248142 |
| rs3737188  | TEK       | 9 | 27203580 | 4 | 1.477346 |
| rs3737188  | TEK       | 9 | 27203580 | 2 | 4.470013 |
| rs7037246  | TEK       | 9 | 27219544 | 8 | 1.188819 |
| rs7037246  | TEK       | 9 | 27219544 | 6 | 0.070981 |
| rs857      | TEK       | 9 | 27219786 | 2 | 2.732777 |
| rs857      | TEK       | 9 | 27219786 | 7 | 0.760954 |
| rs9987817  | TEK       | 9 | 27220152 | 1 | 4.615392 |
| rs1057524  | C9orf11   | 9 | 27274708 | 4 | 1.270077 |
| rs1057524  | C9orf11   | 9 | 27274708 | 2 | 4.84743  |
| rs1057524  | C9orf11   | 9 | 27274708 | 5 | 0.619635 |
| rs3739530  | MOBKL2B   | 9 | 27320514 | 5 | 0.0912   |
| rs700782   | IFNK      | 9 | 27516047 | 6 | 1.036134 |
| rs700782   | IFNK      | 9 | 27516047 | 5 | 0.417882 |
| rs700782   | IFNK      | 9 | 27516047 | 1 | 6.071346 |
| rs3739527  | IFNK      | 9 | 27516480 | 6 | 0.797757 |
| rs3849944  | C9orf72   | 9 | 27550594 | 6 | 1.251186 |
| rs3849944  | C9orf72   | 9 | 27550594 | 3 | 1.004039 |
| rs3849944  | C9orf72   | 9 | 27550594 | 1 | 0.87097  |
| rs12347222 | C9orf72   | 9 | 27550965 | 6 | 1.478846 |
| rs813504   | LOC392298 | 9 | 27599207 | 3 | 3.300534 |
| rs813504   | LOC392298 | 9 | 27599207 | 7 | 2.151401 |
| rs813504   | LOC392298 | 9 | 27599207 | 4 | 1.968848 |
| rs2889829  | LOC392298 | 9 | 27600657 | 4 | 2.433335 |
| rs16918170 | LOC392301 | 9 | 32323630 | 8 | 2.283289 |
| rs16918170 | LOC392301 | 9 | 32323630 | 4 | 1.756137 |
| rs12555727 | DDX58     | 9 | 32446656 | 4 | 3.167038 |
| rs12555727 | DDX58     | 9 | 32446656 | 1 | 4.064765 |
| rs12555727 | DDX58     | 9 | 32446656 | 5 | 5.108715 |
| rs17217280 | DDX58     | 9 | 32470251 | 4 | 0.218942 |
| rs10813831 | DDX58     | 9 | 32516146 | 2 | 2.444882 |
| rs3739674  | DDX58     | 9 | 32516233 | 8 | 0.986754 |
| rs3739674  | DDX58     | 9 | 32516233 | 1 | 3.748376 |
| rs3739674  | DDX58     | 9 | 32516233 | 5 | 0.681771 |
| rs10971128 | LOC401498 | 9 | 32775076 | 7 | 0.462975 |
| rs10971128 | LOC401498 | 9 | 32775076 | 6 | 1.60564  |
| rs2297218  | DNAJA1    | 9 | 33015251 | 3 | 0.483893 |
| rs2297218  | DNAJA1    | 9 | 33015251 | 1 | 5.96331  |

|               |           |   |          |   |          |
|---------------|-----------|---|----------|---|----------|
| rs2228332     | AQP3      | 9 | 33432952 | 4 | 3.827877 |
| rs2228332     | AQP3      | 9 | 33432952 | 2 | 1.24586  |
| rs2228332     | AQP3      | 9 | 33432952 | 1 | 0.077891 |
| rs2228332     | AQP3      | 9 | 33432952 | 5 | 1.245843 |
| rs2228332     | AQP3      | 9 | 33432952 | 3 | 3.134581 |
| rs12555686    | AQP3      | 9 | 33437547 | 7 | 0.688107 |
| rs2777744     | NOL6      | 9 | 33463893 | 5 | 0.09898  |
| rs2777744     | NOL6      | 9 | 33463893 | 2 | 0.284969 |
| rs2777744     | NOL6      | 9 | 33463893 | 1 | 1.176191 |
| rs1378        | WDR40A    | 9 | 34097504 | 2 | 2.152793 |
| SNP9-34247095 | KIF24     | 9 | 34247095 | 6 | 0.635762 |
| SNP9-34247095 | KIF24     | 9 | 34247095 | 4 | 0.234589 |
| SNP9-34247095 | KIF24     | 9 | 34247095 | 1 | 5.966204 |
| SNP9-34612389 | ARID3C    | 9 | 34612389 | 8 | 0.316065 |
| SNP9-34612389 | ARID3C    | 9 | 34612389 | 5 | 0.314169 |
| SNP9-34612389 | ARID3C    | 9 | 34612389 | 4 | 0.017485 |
| SNP9-34612389 | ARID3C    | 9 | 34612389 | 1 | 3.260335 |
| SNP9-34612389 | ARID3C    | 9 | 34612389 | 6 | 0.246825 |
| rs11574915    | CCL21     | 9 | 34700084 | 2 | 0.9308   |
| rs3739873     | KIAA1045  | 9 | 34968431 | 7 | 0.259513 |
| rs3739873     | KIAA1045  | 9 | 34968431 | 3 | 0.171275 |
| rs13301981    | KIAA1045  | 9 | 34969623 | 6 | 0.206114 |
| rs13301981    | KIAA1045  | 9 | 34969623 | 3 | 1.754252 |
| rs13301981    | KIAA1045  | 9 | 34969623 | 1 | 1.95572  |
| rs885451      | DNAJB5    | 9 | 34987569 | 6 | 0.986042 |
| rs885451      | DNAJB5    | 9 | 34987569 | 1 | 5.415193 |
| rs885451      | DNAJB5    | 9 | 34987569 | 3 | 0.533415 |
| rs615474      | C9orf131  | 9 | 35033291 | 3 | 1.028134 |
| rs615474      | C9orf131  | 9 | 35033291 | 8 | 0.964915 |
| rs615474      | C9orf131  | 9 | 35033291 | 1 | 3.992308 |
| SNP9-35034398 | C9orf131  | 9 | 35034398 | 1 | 2.660172 |
| SNP9-35034398 | C9orf131  | 9 | 35034398 | 7 | 0.484132 |
| rs755774      | LOC730112 | 9 | 35552549 | 7 | 1.583141 |
| rs755774      | LOC730112 | 9 | 35552549 | 8 | 0.84504  |
| rs755774      | LOC730112 | 9 | 35552549 | 6 | 0.11748  |
| rs755774      | LOC730112 | 9 | 35552549 | 4 | 0.335809 |
| rs755774      | LOC730112 | 9 | 35552549 | 3 | 0.6328   |
| SNP9-35608053 | CD72      | 9 | 35608053 | 7 | 6.312865 |
| SNP9-35655153 | C9orf100  | 9 | 35655153 | 1 | 4.365793 |
| SNP9-35655153 | C9orf100  | 9 | 35655153 | 6 | 1.932793 |
| SNP9-35816038 | C9orf128  | 9 | 35816038 | 6 | 1.147501 |
| SNP9-35816038 | C9orf128  | 9 | 35816038 | 5 | 0.256774 |
| SNP9-35816038 | C9orf128  | 9 | 35816038 | 4 | 1.982307 |
| SNP9-35816058 | C9orf128  | 9 | 35816058 | 4 | 0.377845 |
| SNP9-35816058 | C9orf128  | 9 | 35816058 | 5 | 0.444152 |
| rs2236293     | C9orf127  | 9 | 35831783 | 7 | 0.798768 |
| rs2236293     | C9orf127  | 9 | 35831783 | 8 | 0.193844 |

|               |           |   |          |   |          |
|---------------|-----------|---|----------|---|----------|
| rs10491554    | LOC158376 | 9 | 35900690 | 7 | 0.129179 |
| rs10491554    | LOC158376 | 9 | 35900690 | 4 | 1.906407 |
| rs10491554    | LOC158376 | 9 | 35900690 | 1 | 1.204751 |
| rs10814297    | LOC158376 | 9 | 35900945 | 4 | 1.108923 |
| rs10814297    | LOC158376 | 9 | 35900945 | 7 | 0.002572 |
| rs10814297    | LOC158376 | 9 | 35900945 | 2 | 0.1671   |
| rs10814297    | LOC158376 | 9 | 35900945 | 1 | 0.302788 |
| rs11788747    | RECK      | 9 | 36095264 | 7 | 0.597093 |
| rs11788747    | RECK      | 9 | 36095264 | 3 | 0.934494 |
| rs10972727    | RECK      | 9 | 36100063 | 7 | 5.853789 |
| rs10972727    | RECK      | 9 | 36100063 | 8 | 0.723669 |
| rs10972727    | RECK      | 9 | 36100063 | 3 | 0.163636 |
| rs6610        | C9orf19   | 9 | 36153563 | 1 | 0.758604 |
| rs6610        | C9orf19   | 9 | 36153563 | 3 | 0.707604 |
| rs2840246     | ZBTB5     | 9 | 37428526 | 1 | 5.516098 |
| rs2840246     | ZBTB5     | 9 | 37428526 | 6 | 2.365787 |
| rs16934158    | POLR1E    | 9 | 37479378 | 3 | 0.593321 |
| rs16934158    | POLR1E    | 9 | 37479378 | 4 | 0.805463 |
| rs3739576     | POLR1E    | 9 | 37482679 | 2 | 4.350395 |
| rs7021977     | C9orf105  | 9 | 37582452 | 2 | 4.228872 |
| rs7021977     | C9orf105  | 9 | 37582452 | 3 | 0.250955 |
| rs2281872     | FRMPD1    | 9 | 37730637 | 8 | 0.092628 |
| rs3747541     | FRMPD1    | 9 | 37735413 | 3 | 2.126293 |
| rs3747541     | FRMPD1    | 9 | 37735413 | 1 | 1.825974 |
| rs3747541     | FRMPD1    | 9 | 37735413 | 7 | 0.490756 |
| rs10115457    | WDR32     | 9 | 37851794 | 1 | 4.825812 |
| rs10115457    | WDR32     | 9 | 37851794 | 7 | 0.068172 |
| rs4646769     | LOC730157 | 9 | 38382938 | 2 | 3.077257 |
| rs4646769     | LOC730157 | 9 | 38382938 | 3 | 0.670276 |
| rs3043        | ALDH1B1   | 9 | 38387355 | 4 | 0.233378 |
| rs7857013     | IGFBPL1   | 9 | 38399037 | 7 | 1.72737  |
| rs7857013     | IGFBPL1   | 9 | 38399037 | 8 | 1.78868  |
| rs7857013     | IGFBPL1   | 9 | 38399037 | 1 | 1.974213 |
| rs7857243     | IGFBPL1   | 9 | 38399081 | 5 | 0.043905 |
| rs7046879     | C9orf122  | 9 | 38612368 | 5 | 0.353596 |
| rs7046879     | C9orf122  | 9 | 38612368 | 4 | 0.792339 |
| rs13294677    | LOC647051 | 9 | 38633129 | 3 | 0.085759 |
| rs10869119    | LOC347097 | 9 | 70414748 | 1 | 4.144689 |
| rs10869119    | LOC347097 | 9 | 70414748 | 3 | 3.91448  |
| rs10869119    | LOC347097 | 9 | 70414748 | 6 | 4.895982 |
| rs2003195     | LOC347097 | 9 | 70414952 | 1 | 4.950215 |
| rs3730386     | PRKACG    | 9 | 70818027 | 3 | 0.129407 |
| rs2309428     | TJP2      | 9 | 71032843 | 5 | 0.255094 |
| SNP9-71931132 | MAMDC2    | 9 | 71931132 | 4 | 0.228569 |
| SNP9-72123594 | SMC5      | 9 | 72123594 | 8 | 6.887509 |
| SNP9-72123594 | SMC5      | 9 | 72123594 | 4 | 0.539883 |
| rs1123        | GDA       | 9 | 74053707 | 8 | 1.754011 |

|            |           |   |          |   |          |
|------------|-----------|---|----------|---|----------|
| rs1123     | GDA       | 9 | 74053707 | 1 | 5.378836 |
| rs1123     | GDA       | 9 | 74053707 | 4 | 0.214485 |
| rs2208744  | GDA       | 9 | 74054897 | 8 | 0.056723 |
| rs2208744  | GDA       | 9 | 74054897 | 6 | 1.247681 |
| rs2208744  | GDA       | 9 | 74054897 | 2 | 2.867208 |
| rs2208744  | GDA       | 9 | 74054897 | 7 | 0.103818 |
| rs7022441  | TMC1      | 9 | 74326609 | 1 | 3.576524 |
| rs13959    | ALDH1A1   | 9 | 74735702 | 6 | 1.7255   |
| rs13959    | ALDH1A1   | 9 | 74735702 | 2 | 3.108972 |
| rs13959    | ALDH1A1   | 9 | 74735702 | 1 | 0.391185 |
| rs2273975  | RORB      | 9 | 76447166 | 4 | 0.351156 |
| rs2274924  | TRPM6     | 9 | 76566467 | 5 | 0.082018 |
| rs2274924  | TRPM6     | 9 | 76566467 | 4 | 1.157818 |
| rs4145894  | TRPM6     | 9 | 76597456 | 8 | 3.62256  |
| rs4145894  | TRPM6     | 9 | 76597456 | 1 | 4.062367 |
| rs4145894  | TRPM6     | 9 | 76597456 | 7 | 0.42468  |
| rs7859201  | TRPM6     | 9 | 76605104 | 1 | 0.5437   |
| rs7859201  | TRPM6     | 9 | 76605104 | 8 | 4.651495 |
| rs7859201  | TRPM6     | 9 | 76605104 | 6 | 3.684346 |
| rs11144089 | TRPM6     | 9 | 76606792 | 6 | 1.347188 |
| rs11144089 | TRPM6     | 9 | 76606792 | 4 | 0.49078  |
| rs2273769  | OSTF1     | 9 | 76942330 | 2 | 1.94861  |
| rs34417623 | PCSK5     | 9 | 77828617 | 1 | 5.452226 |
| rs2490582  | RFK       | 9 | 78198926 | 4 | 0.445121 |
| rs683969   | GCNT1     | 9 | 78309572 | 7 | 0.21578  |
| rs589561   | GCNT1     | 9 | 78310295 | 2 | 0.700076 |
| rs13290974 | LOC392352 | 9 | 78354466 | 7 | 0.48185  |
| rs1425286  | NULL      | 9 | 78418844 | 1 | 5.04091  |
| rs1425286  | NULL      | 9 | 78418844 | 7 | 0.461267 |
| rs4745571  | NULL      | 9 | 78508187 | 4 | 0.277154 |
| rs4745571  | NULL      | 9 | 78508187 | 5 | 2.063767 |
| rs560094   | NULL      | 9 | 78508291 | 3 | 1.236468 |
| rs560094   | NULL      | 9 | 78508291 | 1 | 1.000641 |
| rs560094   | NULL      | 9 | 78508291 | 7 | 1.164928 |
| rs560094   | NULL      | 9 | 78508291 | 4 | 0.745229 |
| rs560094   | NULL      | 9 | 78508291 | 2 | 1.861112 |
| rs561970   | NULL      | 9 | 78508497 | 4 | 0.188974 |
| rs561970   | NULL      | 9 | 78508497 | 1 | 0.151565 |
| rs561970   | NULL      | 9 | 78508497 | 3 | 0.745729 |
| rs561970   | NULL      | 9 | 78508497 | 2 | 0.840238 |
| rs620985   | NULL      | 9 | 78508741 | 3 | 0.504451 |
| rs620985   | NULL      | 9 | 78508741 | 8 | 3.020438 |
| rs620985   | NULL      | 9 | 78508741 | 1 | 1.379374 |
| rs620985   | NULL      | 9 | 78508741 | 2 | 1.02826  |
| rs620985   | NULL      | 9 | 78508741 | 4 | 0.929345 |
| rs3739524  | NULL      | 9 | 78509915 | 8 | 0.379503 |
| rs512110   | NULL      | 9 | 78510460 | 3 | 0.709589 |

|               |           |   |          |   |          |
|---------------|-----------|---|----------|---|----------|
| rs512110      | NULL      | 9 | 78510460 | 1 | 1.09478  |
| rs517634      | NULL      | 9 | 78511096 | 2 | 0.399606 |
| rs517634      | NULL      | 9 | 78511096 | 1 | 0.121641 |
| rs517634      | NULL      | 9 | 78511096 | 4 | 0.080304 |
| rs517634      | NULL      | 9 | 78511096 | 3 | 0.586042 |
| rs577993      | NULL      | 9 | 78511691 | 4 | 1.206195 |
| rs577993      | NULL      | 9 | 78511691 | 7 | 0.718636 |
| rs577993      | NULL      | 9 | 78511691 | 2 | 2.24605  |
| rs577993      | NULL      | 9 | 78511691 | 3 | 1.021195 |
| rs577993      | NULL      | 9 | 78511691 | 8 | 3.778418 |
| rs577993      | NULL      | 9 | 78511691 | 1 | 1.516688 |
| rs683866      | NULL      | 9 | 78511888 | 3 | 0.715477 |
| rs683866      | NULL      | 9 | 78511888 | 1 | 1.295784 |
| rs683866      | NULL      | 9 | 78511888 | 2 | 1.142554 |
| rs680775      | NULL      | 9 | 78512494 | 3 | 1.007974 |
| rs680775      | NULL      | 9 | 78512494 | 1 | 0.994253 |
| rs680729      | NULL      | 9 | 78512540 | 2 | 1.944561 |
| rs680729      | NULL      | 9 | 78512540 | 1 | 0.561509 |
| rs680729      | NULL      | 9 | 78512540 | 3 | 0.457511 |
| rs530978      | NULL      | 9 | 78513999 | 8 | 4.2758   |
| rs530978      | NULL      | 9 | 78513999 | 3 | 1.060702 |
| rs530978      | NULL      | 9 | 78513999 | 2 | 3.755509 |
| rs530978      | NULL      | 9 | 78513999 | 4 | 5.602209 |
| rs530978      | NULL      | 9 | 78513999 | 1 | 0.879173 |
| rs530978      | NULL      | 9 | 78513999 | 7 | 1.366605 |
| rs12238013    | NULL      | 9 | 78514259 | 8 | 5.341271 |
| rs557352      | NULL      | 9 | 78514561 | 8 | 0.218808 |
| rs557352      | NULL      | 9 | 78514561 | 3 | 0.384577 |
| rs557352      | NULL      | 9 | 78514561 | 1 | 0.426676 |
| rs557352      | NULL      | 9 | 78514561 | 6 | 1.391375 |
| rs557352      | NULL      | 9 | 78514561 | 4 | 0.901552 |
| rs557352      | NULL      | 9 | 78514561 | 7 | 0.245058 |
| rs557352      | NULL      | 9 | 78514561 | 2 | 4.150951 |
| rs11145017    | NULL      | 9 | 78514775 | 8 | 0.135331 |
| rs611461      | NULL      | 9 | 78515435 | 4 | 0.246399 |
| rs611461      | NULL      | 9 | 78515435 | 3 | 0.437885 |
| rs611461      | NULL      | 9 | 78515435 | 1 | 0.005462 |
| rs611461      | NULL      | 9 | 78515435 | 2 | 0.818926 |
| rs11145226    | LOC645225 | 9 | 78845248 | 7 | 0.006144 |
| rs11145227    | LOC645225 | 9 | 78845315 | 7 | 0.32816  |
| SNP9-79080826 | VPS13A    | 9 | 79080826 | 1 | 5.3735   |
| rs1801258     | GNA14     | 9 | 79239118 | 5 | 0.576981 |
| rs1801258     | GNA14     | 9 | 79239118 | 4 | 5.583468 |
| rs1801258     | GNA14     | 9 | 79239118 | 3 | 0.38889  |
| rs10122426    | KRT18P24  | 9 | 80841766 | 1 | 1.967396 |
| rs4750        | GKAP1     | 9 | 85544331 | 5 | 0.159744 |
| rs4750        | GKAP1     | 9 | 85544331 | 1 | 6.567031 |

|               |          |   |          |   |          |
|---------------|----------|---|----------|---|----------|
| rs4750        | GKAP1    | 9 | 85544331 | 7 | 0.333494 |
| SNP9-85663935 | KIF27    | 9 | 85663935 | 1 | 0.188162 |
| SNP9-85663935 | KIF27    | 9 | 85663935 | 2 | 2.379779 |
| SNP9-85663935 | KIF27    | 9 | 85663935 | 6 | 3.176423 |
| SNP9-85663935 | KIF27    | 9 | 85663935 | 5 | 0.49039  |
| rs167203      | HNRPK    | 9 | 85783134 | 7 | 0.597766 |
| rs296887      | HNRPK    | 9 | 85784890 | 6 | 1.200469 |
| rs296887      | HNRPK    | 9 | 85784890 | 2 | 3.766343 |
| rs296887      | HNRPK    | 9 | 85784890 | 7 | 2.298413 |
| rs796003      | RMI1     | 9 | 85785621 | 6 | 0.28865  |
| rs796003      | RMI1     | 9 | 85785621 | 2 | 3.875077 |
| rs796003      | RMI1     | 9 | 85785621 | 7 | 0.743017 |
| rs1982151     | RMI1     | 9 | 85807085 | 7 | 1.158232 |
| rs1982151     | RMI1     | 9 | 85807085 | 6 | 2.537904 |
| rs1982151     | RMI1     | 9 | 85807085 | 2 | 4.216603 |
| rs1187325     | NTRK2    | 9 | 86475415 | 4 | 0.466609 |
| rs1187325     | NTRK2    | 9 | 86475415 | 3 | 0.220521 |
| rs1187325     | NTRK2    | 9 | 86475415 | 5 | 0.31512  |
| rs1187325     | NTRK2    | 9 | 86475415 | 7 | 0.262067 |
| rs7816        | NTRK2    | 9 | 86620341 | 7 | 0.234428 |
| rs7816        | NTRK2    | 9 | 86620341 | 5 | 0.656625 |
| rs10780691    | NTRK2    | 9 | 86681073 | 1 | 2.555476 |
| rs10780691    | NTRK2    | 9 | 86681073 | 8 | 0.49491  |
| rs10780691    | NTRK2    | 9 | 86681073 | 7 | 0.098225 |
| rs7450        | MAK10    | 9 | 87826707 | 4 | 5.199428 |
| rs7450        | MAK10    | 9 | 87826707 | 5 | 8.609934 |
| rs2225237     | GOLM1    | 9 | 87904824 | 5 | 0.268606 |
| rs2225237     | GOLM1    | 9 | 87904824 | 4 | 1.253268 |
| rs4440696     | ZCCHC6   | 9 | 88093187 | 5 | 6.63483  |
| rs4440696     | ZCCHC6   | 9 | 88093187 | 6 | 0.026298 |
| rs4440696     | ZCCHC6   | 9 | 88093187 | 3 | 0.52235  |
| rs4440696     | ZCCHC6   | 9 | 88093187 | 2 | 6.078143 |
| rs4440696     | ZCCHC6   | 9 | 88093187 | 8 | 6.152801 |
| rs791323      | ZCCHC6   | 9 | 88149758 | 2 | 3.14876  |
| rs791323      | ZCCHC6   | 9 | 88149758 | 8 | 0.295622 |
| rs791323      | ZCCHC6   | 9 | 88149758 | 5 | 9.636997 |
| rs461126      | FLJ45537 | 9 | 88953394 | 8 | 0.663035 |
| rs277755      | FLJ45537 | 9 | 88962233 | 7 | 2.33343  |
| rs277755      | FLJ45537 | 9 | 88962233 | 1 | 0.8219   |
| rs277755      | FLJ45537 | 9 | 88962233 | 3 | 0.189267 |
| rs277753      | FLJ45537 | 9 | 88962836 | 2 | 1.513674 |
| rs277753      | FLJ45537 | 9 | 88962836 | 1 | 2.004314 |
| rs3818584     | DAPK1    | 9 | 89454835 | 3 | 0.913095 |
| rs3818584     | DAPK1    | 9 | 89454835 | 1 | 1.759863 |
| SNP9-89511843 | DAPK1    | 9 | 89511843 | 2 | 0.360928 |
| SNP9-89511843 | DAPK1    | 9 | 89511843 | 5 | 6.519736 |
| rs10735592    | CTSL3    | 9 | 89578359 | 6 | 4.248715 |

|            |           |   |          |   |          |
|------------|-----------|---|----------|---|----------|
| rs4076795  | C9orf79   | 9 | 89691268 | 4 | 0.326924 |
| rs4076795  | C9orf79   | 9 | 89691268 | 3 | 0.030428 |
| rs4076794  | C9orf79   | 9 | 89691334 | 5 | 1.056391 |
| rs11789780 | C9orf79   | 9 | 89692827 | 5 | 1.194036 |
| rs11789780 | C9orf79   | 9 | 89692827 | 3 | 0.592682 |
| rs11789780 | C9orf79   | 9 | 89692827 | 4 | 0.786284 |
| rs11789780 | C9orf79   | 9 | 89692827 | 8 | 1.659427 |
| rs11789780 | C9orf79   | 9 | 89692827 | 6 | 1.009356 |
| rs11789780 | C9orf79   | 9 | 89692827 | 2 | 0.356484 |
| rs28364935 | CCRK      | 9 | 89778790 | 6 | 0.072647 |
| rs3818707  | LOC389768 | 9 | 89985821 | 5 | 4.806337 |
| rs3818707  | LOC389768 | 9 | 89985821 | 6 | 4.062048 |
| rs2814847  | LOC389768 | 9 | 89986087 | 1 | 1.1248   |
| rs2814848  | LOC389768 | 9 | 89986088 | 7 | 1.068496 |
| rs4269628  | NXNL2     | 9 | 90379897 | 3 | 0.095934 |
| rs6559331  | C9orf47   | 9 | 90797689 | 6 | 0.326482 |
| rs6559331  | C9orf47   | 9 | 90797689 | 5 | 1.41344  |
| rs3934594  | C9orf47   | 9 | 90800363 | 6 | 1.427921 |
| rs3934594  | C9orf47   | 9 | 90800363 | 1 | 2.364408 |
| rs7045576  | C9orf47   | 9 | 90800749 | 1 | 1.789361 |
| rs1867     | EDG3      | 9 | 90809604 | 2 | 2.702022 |
| rs1867     | EDG3      | 9 | 90809604 | 1 | 2.138068 |
| rs12519    | SHC3      | 9 | 90817902 | 3 | 0.472134 |
| rs12519    | SHC3      | 9 | 90817902 | 1 | 2.871161 |
| rs4876978  | C9orf164  | 9 | 91166340 | 2 | 6.107763 |
| rs4876978  | C9orf164  | 9 | 91166340 | 6 | 2.050291 |
| rs4876978  | C9orf164  | 9 | 91166340 | 7 | 1.411558 |
| rs4876978  | C9orf164  | 9 | 91166340 | 3 | 2.356458 |
| rs4876978  | C9orf164  | 9 | 91166340 | 5 | 1.850656 |
| rs13283164 | C9orf164  | 9 | 91169258 | 3 | 0.248111 |
| rs11526468 | SEMA4D    | 9 | 91193499 | 3 | 0.361329 |
| rs11526468 | SEMA4D    | 9 | 91193499 | 5 | 3.517191 |
| rs1542479  | DIRAS2    | 9 | 92412869 | 4 | 0.843222 |
| rs1542479  | DIRAS2    | 9 | 92412869 | 7 | 0.037461 |
| rs726214   | DIRAS2    | 9 | 92413821 | 1 | 4.387597 |
| rs726214   | DIRAS2    | 9 | 92413821 | 5 | 0.353217 |
| rs1049164  | SYK       | 9 | 92698027 | 1 | 3.021935 |
| rs7874056  | AUH       | 9 | 93127443 | 1 | 3.749268 |
| rs10820900 | ROR2      | 9 | 93535429 | 5 | 5.059938 |
| rs10820900 | ROR2      | 9 | 93535429 | 4 | 0.77278  |
| rs16907720 | ROR2      | 9 | 93539618 | 3 | 0.862837 |
| rs16907720 | ROR2      | 9 | 93539618 | 4 | 0.097695 |
| rs16907720 | ROR2      | 9 | 93539618 | 5 | 2.969201 |
| rs1058751  | IARS      | 9 | 94012737 | 7 | 9.164506 |
| rs710162   | NOL8      | 9 | 94099611 | 1 | 4.341421 |
| rs710162   | NOL8      | 9 | 94099611 | 8 | 1.002625 |
| rs710162   | NOL8      | 9 | 94099611 | 6 | 3.65012  |

|               |           |   |          |   |          |
|---------------|-----------|---|----------|---|----------|
| rs710162      | NOL8      | 9 | 94099611 | 3 | 0.014712 |
| rs4298540     | NOL8      | 9 | 94099654 | 3 | 0.062596 |
| rs7027898     | NOL8      | 9 | 94107867 | 1 | 4.350023 |
| rs7027898     | NOL8      | 9 | 94107867 | 6 | 0.250142 |
| rs7027898     | NOL8      | 9 | 94107867 | 3 | 0.213933 |
| rs17678735    | NOL8      | 9 | 94117648 | 3 | 0.157595 |
| rs10123342    | CENPP     | 9 | 94127645 | 1 | 4.444129 |
| rs10123342    | CENPP     | 9 | 94127645 | 6 | 0.453556 |
| rs10123342    | CENPP     | 9 | 94127645 | 8 | 1.827937 |
| rs1053446     | OGN       | 9 | 94186582 | 1 | 6.650029 |
| rs1380        | OGN       | 9 | 94187255 | 1 | 4.884429 |
| rs1053441     | OGN       | 9 | 94187661 | 3 | 0.188724 |
| rs1053441     | OGN       | 9 | 94187661 | 6 | 1.313539 |
| SNP9-94219000 | OMD       | 9 | 94219000 | 3 | 0.796741 |
| rs17519719    | ASPN      | 9 | 94258420 | 3 | 0.223319 |
| rs8067        | ASPN      | 9 | 94258650 | 1 | 4.569908 |
| rs8067        | ASPN      | 9 | 94258650 | 3 | 0.172415 |
| rs3174352     | ASPN      | 9 | 94259069 | 3 | 0.326142 |
| rs3174352     | ASPN      | 9 | 94259069 | 1 | 3.626031 |
| rs17591776    | ASPN      | 9 | 94259140 | 3 | 0.163669 |
| rs2296667     | ECM2      | 9 | 94314159 | 6 | 0.675117 |
| rs2296667     | ECM2      | 9 | 94314159 | 3 | 1.364303 |
| rs2296667     | ECM2      | 9 | 94314159 | 1 | 6.038015 |
| rs968040      | ECM2      | 9 | 94319806 | 1 | 4.037371 |
| SNP9-94415289 | CENPP     | 9 | 94415289 | 3 | 0.369994 |
| rs2277170     | IPPK      | 9 | 94436533 | 3 | 0.042421 |
| rs7045305     | EEF1DP2   | 9 | 94639646 | 7 | 0.600218 |
| rs7045305     | EEF1DP2   | 9 | 94639646 | 5 | 1.383566 |
| rs3802381     | FGD3      | 9 | 94778602 | 7 | 0.276591 |
| rs3802381     | FGD3      | 9 | 94778602 | 1 | 1.35559  |
| rs4073460     | FGD3      | 9 | 94837820 | 5 | 0.020658 |
| rs4073460     | FGD3      | 9 | 94837820 | 4 | 0.832385 |
| rs4073460     | FGD3      | 9 | 94837820 | 6 | 1.491975 |
| rs4073460     | FGD3      | 9 | 94837820 | 1 | 0.737987 |
| rs4744201     | WNK2      | 9 | 95055077 | 5 | 0.914281 |
| rs4744201     | WNK2      | 9 | 95055077 | 1 | 3.894948 |
| rs4744201     | WNK2      | 9 | 95055077 | 6 | 4.665025 |
| rs4744201     | WNK2      | 9 | 95055077 | 3 | 0.448966 |
| SNP9-95061133 | WNK2      | 9 | 95061133 | 3 | 0.279207 |
| SNP9-95061133 | WNK2      | 9 | 95061133 | 1 | 2.817756 |
| SNP9-95061133 | WNK2      | 9 | 95061133 | 5 | 7.823352 |
| SNP9-95061133 | WNK2      | 9 | 95061133 | 6 | 0.157557 |
| rs4744216     | WNK2      | 9 | 95092116 | 1 | 3.522521 |
| rs1055710     | FAM120AOS | 9 | 95254749 | 5 | 0.790021 |
| rs1055710     | FAM120AOS | 9 | 95254749 | 3 | 0.972989 |
| rs1055710     | FAM120AOS | 9 | 95254749 | 1 | 2.661333 |
| rs7038310     | PHF2      | 9 | 95447741 | 6 | 0.468286 |



|               |           |   |          |   |          |
|---------------|-----------|---|----------|---|----------|
| rs7038310     | PHF2      | 9 | 95447741 | 3 | 0.45105  |
| rs1536690     | ZNF169    | 9 | 96095131 | 4 | 3.06015  |
| rs1536690     | ZNF169    | 9 | 96095131 | 2 | 3.362957 |
| rs1536690     | ZNF169    | 9 | 96095131 | 8 | 4.280505 |
| rs1048510     | FBP2      | 9 | 96360948 | 1 | 2.373249 |
| rs1048510     | FBP2      | 9 | 96360948 | 7 | 1.177992 |
| rs2296707     | FBP1      | 9 | 96441607 | 3 | 2.860147 |
| rs357564      | PTCH1     | 9 | 97249415 | 3 | 1.009017 |
| rs357564      | PTCH1     | 9 | 97249415 | 7 | 0.693559 |
| rs357564      | PTCH1     | 9 | 97249415 | 5 | 4.761265 |
| rs357564      | PTCH1     | 9 | 97249415 | 1 | 6.248459 |
| rs690528      | LOC375748 | 9 | 97678109 | 6 | 0.34681  |
| rs690528      | LOC375748 | 9 | 97678109 | 8 | 6.009525 |
| rs690528      | LOC375748 | 9 | 97678109 | 1 | 3.759259 |
| rs690528      | LOC375748 | 9 | 97678109 | 3 | 0.096383 |
| rs10512243    | C9orf102  | 9 | 97815280 | 1 | 6.369836 |
| rs2066479     | HSD17B3   | 9 | 98037631 | 3 | 0.522543 |
| rs2066484     | HSD17B3   | 9 | 98104217 | 3 | 1.336082 |
| rs2066474     | HSD17B3   | 9 | 98104246 | 5 | 2.286399 |
| rs7030316     | HABP4     | 9 | 98290284 | 1 | 4.611615 |
| rs7030316     | HABP4     | 9 | 98290284 | 4 | 1.312928 |
| rs2493444     | KIAA1529  | 9 | 99089791 | 4 | 2.066379 |
| rs2487874     | KIAA1529  | 9 | 99089793 | 4 | 0.682955 |
| rs3747504     | KIAA1529  | 9 | 99114267 | 3 | 1.587542 |
| rs3747504     | KIAA1529  | 9 | 99114267 | 7 | 0.380124 |
| rs3747504     | KIAA1529  | 9 | 99114267 | 5 | 2.158977 |
| rs3747504     | KIAA1529  | 9 | 99114267 | 2 | 4.487398 |
| rs3747504     | KIAA1529  | 9 | 99114267 | 8 | 3.538989 |
| SNP9-99127166 | KIAA1529  | 9 | 99127166 | 3 | 0.700685 |
| SNP9-99127166 | KIAA1529  | 9 | 99127166 | 7 | 0.29685  |
| SNP9-99127166 | KIAA1529  | 9 | 99127166 | 2 | 2.080209 |
| SNP9-99127166 | KIAA1529  | 9 | 99127166 | 4 | 1.058357 |
| SNP9-99127166 | KIAA1529  | 9 | 99127166 | 8 | 1.329132 |
| SNP9-99127166 | KIAA1529  | 9 | 99127166 | 5 | 4.637595 |
| rs1947717     | KIAA1529  | 9 | 99145556 | 5 | 1.225646 |
| rs1947717     | KIAA1529  | 9 | 99145556 | 8 | 2.145619 |
| rs1947717     | KIAA1529  | 9 | 99145556 | 3 | 1.462536 |
| rs1947717     | KIAA1529  | 9 | 99145556 | 4 | 5.566036 |
| rs1947717     | KIAA1529  | 9 | 99145556 | 2 | 3.475156 |
| rs1947717     | KIAA1529  | 9 | 99145556 | 7 | 0.290398 |
| rs2061634     | KIAA1529  | 9 | 99145603 | 4 | 1.432282 |
| rs3747495     | KIAA1529  | 9 | 99162112 | 7 | 0.42506  |
| rs3747495     | KIAA1529  | 9 | 99162112 | 2 | 2.479161 |
| rs3747495     | KIAA1529  | 9 | 99162112 | 8 | 1.145505 |
| rs3747495     | KIAA1529  | 9 | 99162112 | 3 | 1.262105 |
| rs3747495     | KIAA1529  | 9 | 99162112 | 5 | 0.998287 |
| rs11581       | KIAA1529  | 9 | 99178982 | 2 | 0.684506 |

|            |           |   |           |   |          |
|------------|-----------|---|-----------|---|----------|
| rs11581    | KIAA1529  | 9 | 99178982  | 3 | 0.447632 |
| rs11581    | KIAA1529  | 9 | 99178982  | 7 | 1.695554 |
| rs898870   | KIAA1529  | 9 | 99179217  | 3 | 1.106439 |
| rs898870   | KIAA1529  | 9 | 99179217  | 2 | 2.034759 |
| rs898870   | KIAA1529  | 9 | 99179217  | 7 | 0.414358 |
| rs1800975  | XPA       | 9 | 99499399  | 3 | 1.807622 |
| rs1800975  | XPA       | 9 | 99499399  | 4 | 1.621055 |
| rs1800975  | XPA       | 9 | 99499399  | 6 | 0.592557 |
| rs1800975  | XPA       | 9 | 99499399  | 5 | 1.265142 |
| rs10984009 | FOXE1     | 9 | 99658481  | 6 | 2.809338 |
| rs6586     | C9orf156  | 9 | 99706752  | 7 | 0.071189 |
| rs6586     | C9orf156  | 9 | 99706752  | 5 | 5.580099 |
| rs6586     | C9orf156  | 9 | 99706752  | 2 | 3.585231 |
| rs6586     | C9orf156  | 9 | 99706752  | 8 | 1.136907 |
| rs3802475  | C9orf156  | 9 | 99724540  | 7 | 0.797751 |
| rs3802475  | C9orf156  | 9 | 99724540  | 1 | 0.172436 |
| rs3183927  | C9orf156  | 9 | 99724578  | 8 | 2.740747 |
| rs3183927  | C9orf156  | 9 | 99724578  | 7 | 0.804032 |
| rs3183927  | C9orf156  | 9 | 99724578  | 4 | 0.277279 |
| rs3183927  | C9orf156  | 9 | 99724578  | 1 | 3.366579 |
| rs1573025  | TBC1D2    | 9 | 100031251 | 7 | 0.598589 |
| rs10124070 | GABBR2    | 9 | 100091700 | 1 | 2.499878 |
| rs2808536  | GABBR2    | 9 | 100380122 | 5 | 1.689854 |
| rs10760479 | ANKS6     | 9 | 100538385 | 4 | 4.819118 |
| rs10760479 | ANKS6     | 9 | 100538385 | 2 | 6.046799 |
| rs2273846  | GALNT12   | 9 | 100651156 | 3 | 0.127878 |
| rs2075662  | COL15A1   | 9 | 100788055 | 4 | 2.667198 |
| rs2297603  | COL15A1   | 9 | 100818086 | 4 | 4.073938 |
| rs420549   | TGFBR1    | 9 | 100954694 | 5 | 0.105201 |
| rs1526267  | NR4A3     | 9 | 101629566 | 2 | 2.35512  |
| rs1526267  | NR4A3     | 9 | 101629566 | 6 | 2.192721 |
| rs1526267  | NR4A3     | 9 | 101629566 | 5 | 0.693957 |
| rs10988904 | NR4A3     | 9 | 101635506 | 4 | 0.106149 |
| rs10988904 | NR4A3     | 9 | 101635506 | 6 | 5.768388 |
| rs10988904 | NR4A3     | 9 | 101635506 | 5 | 5.518325 |
| rs2900223  | NR4A3     | 9 | 101636142 | 5 | 0.085703 |
| rs1131339  | NR4A3     | 9 | 101667123 | 7 | 0.821788 |
| rs1131339  | NR4A3     | 9 | 101667123 | 6 | 3.672651 |
| rs1131339  | NR4A3     | 9 | 101667123 | 8 | 1.154909 |
| rs1131339  | NR4A3     | 9 | 101667123 | 4 | 3.319874 |
| rs1131339  | NR4A3     | 9 | 101667123 | 1 | 5.583018 |
| rs7024375  | INVS      | 9 | 101901434 | 6 | 0.364602 |
| rs7024375  | INVS      | 9 | 101901434 | 4 | 0.087189 |
| rs7024375  | INVS      | 9 | 101901434 | 1 | 3.63506  |
| rs1226590  | LOC347273 | 9 | 102380190 | 3 | 1.113424 |
| rs1226590  | LOC347273 | 9 | 102380190 | 4 | 0.076112 |
| rs1226590  | LOC347273 | 9 | 102380190 | 8 | 2.51163  |

|            |           |   |           |   |          |
|------------|-----------|---|-----------|---|----------|
| rs1226590  | LOC347273 | 9 | 102380190 | 5 | 1.210512 |
| rs1226590  | LOC347273 | 9 | 102380190 | 2 | 4.397941 |
| rs1226590  | LOC347273 | 9 | 102380190 | 1 | 1.081678 |
| rs2780955  | LOC347273 | 9 | 102389031 | 5 | 0.549367 |
| rs2780955  | LOC347273 | 9 | 102389031 | 1 | 0.470718 |
| rs2780955  | LOC347273 | 9 | 102389031 | 8 | 0.819318 |
| rs2780955  | LOC347273 | 9 | 102389031 | 2 | 0.152761 |
| rs2780955  | LOC347273 | 9 | 102389031 | 4 | 0.228084 |
| rs2780955  | LOC347273 | 9 | 102389031 | 3 | 0.359693 |
| rs13302189 | LOC644160 | 9 | 102533779 | 8 | 0.434184 |
| rs4742792  | LOC644160 | 9 | 102533937 | 3 | 3.656658 |
| rs7043029  | BAAT      | 9 | 103163583 | 5 | 1.191817 |
| rs7043029  | BAAT      | 9 | 103163583 | 4 | 1.265706 |
| rs7043029  | BAAT      | 9 | 103163583 | 3 | 0.693589 |
| rs2229594  | BAAT      | 9 | 103164485 | 3 | 0.6338   |
| rs2229594  | BAAT      | 9 | 103164485 | 4 | 0.941554 |
| rs2229594  | BAAT      | 9 | 103164485 | 5 | 1.680249 |
| rs1572983  | BAAT      | 9 | 103173449 | 3 | 0.074967 |
| rs1572983  | BAAT      | 9 | 103173449 | 4 | 0.144233 |
| rs1572983  | BAAT      | 9 | 103173449 | 5 | 0.593595 |
| rs546577   | ZNF189    | 9 | 103212757 | 5 | 0.998725 |
| rs546577   | ZNF189    | 9 | 103212757 | 1 | 4.592554 |
| rs546577   | ZNF189    | 9 | 103212757 | 7 | 0.168124 |
| rs17772869 | ALDOB     | 9 | 103223706 | 4 | 2.425953 |
| rs17772869 | ALDOB     | 9 | 103223706 | 2 | 3.048503 |
| rs17187712 | C9orf125  | 9 | 103278551 | 7 | 1.218681 |
| rs11546567 | C9orf125  | 9 | 103279142 | 7 | 7.093332 |
| rs11546567 | C9orf125  | 9 | 103279142 | 4 | 0.88693  |
| rs16920477 | RNF20     | 9 | 103342446 | 1 | 3.988952 |
| rs10521057 | RNF20     | 9 | 103364366 | 5 | 1.206734 |
| rs10521057 | RNF20     | 9 | 103364366 | 6 | 0.588276 |
| rs10521057 | RNF20     | 9 | 103364366 | 1 | 5.023428 |
| rs1983812  | GRIN3A    | 9 | 103372864 | 1 | 0.654701 |
| rs3824473  | GRIN3A    | 9 | 103374598 | 2 | 2.156434 |
| rs10989563 | GRIN3A    | 9 | 103425532 | 6 | 4.787436 |
| rs10989563 | GRIN3A    | 9 | 103425532 | 5 | 3.396133 |
| rs10989563 | GRIN3A    | 9 | 103425532 | 8 | 2.626205 |
| rs10989563 | GRIN3A    | 9 | 103425532 | 2 | 2.970078 |
| rs10989563 | GRIN3A    | 9 | 103425532 | 1 | 5.106517 |
| rs10820341 | CYLC2     | 9 | 104820583 | 5 | 2.533133 |
| rs3818626  | SMC2      | 9 | 105896454 | 1 | 2.89126  |
| rs3818626  | SMC2      | 9 | 105896454 | 8 | 4.948279 |
| rs3818626  | SMC2      | 9 | 105896454 | 3 | 0.885153 |
| rs3818626  | SMC2      | 9 | 105896454 | 6 | 0.634472 |
| rs10991205 | LOC347281 | 9 | 106078011 | 3 | 0.114739 |
| rs10991205 | LOC347281 | 9 | 106078011 | 1 | 1.554638 |
| rs1851724  | OR13C5    | 9 | 106400743 | 3 | 0.788312 |

|                |           |   |           |   |          |
|----------------|-----------|---|-----------|---|----------|
| rs10761054     | OR13C9    | 9 | 106419716 | 1 | 1.299479 |
| rs10761054     | OR13C9    | 9 | 106419716 | 2 | 1.758657 |
| rs12347076     | OR13D1    | 9 | 106496754 | 3 | 0.33692  |
| rs12347076     | OR13D1    | 9 | 106496754 | 5 | 0.466817 |
| rs12338899     | OR13D1    | 9 | 106497546 | 3 | 1.234402 |
| rs12338899     | OR13D1    | 9 | 106497546 | 2 | 2.015297 |
| rs12338899     | OR13D1    | 9 | 106497546 | 5 | 0.391231 |
| rs10761084     | NIPSNAP3B | 9 | 106570973 | 5 | 3.724983 |
| rs10761084     | NIPSNAP3B | 9 | 106570973 | 3 | 3.089435 |
| rs3739741      | NIPSNAP3B | 9 | 106572996 | 3 | 0.992545 |
| rs3739741      | NIPSNAP3B | 9 | 106572996 | 5 | 0.013597 |
| rs10820730     | NIPSNAP3B | 9 | 106575843 | 3 | 0.457866 |
| rs10820730     | NIPSNAP3B | 9 | 106575843 | 5 | 1.598872 |
| rs363717       | ABCA1     | 9 | 106584521 | 1 | 0.085323 |
| rs363717       | ABCA1     | 9 | 106584521 | 6 | 0.024496 |
| rs4149313      | ABCA1     | 9 | 106626574 | 4 | 0.159314 |
| rs7031748      | ABCA1     | 9 | 106631093 | 5 | 0.940015 |
| rs7031748      | ABCA1     | 9 | 106631093 | 4 | 1.351532 |
| rs2274873      | ABCA1     | 9 | 106642499 | 7 | 0.538179 |
| rs2274873      | ABCA1     | 9 | 106642499 | 3 | 0.221585 |
| rs2230806      | ABCA1     | 9 | 106660688 | 6 | 0.190521 |
| rs2230806      | ABCA1     | 9 | 106660688 | 5 | 0.875569 |
| rs2230806      | ABCA1     | 9 | 106660688 | 7 | 0.174325 |
| rs2230805      | ABCA1     | 9 | 106663850 | 5 | 2.013792 |
| rs2230805      | ABCA1     | 9 | 106663850 | 7 | 0.436826 |
| rs2271247      | TMEM38B   | 9 | 107496709 | 2 | 4.403366 |
| rs2271247      | TMEM38B   | 9 | 107496709 | 7 | 0.612979 |
| SNP9-108729573 | ZNF462    | 9 | 108729573 | 8 | 1.878077 |
| SNP9-108729573 | ZNF462    | 9 | 108729573 | 3 | 0.038898 |
| rs10759212     | LOC644661 | 9 | 108972698 | 1 | 2.842333 |
| rs10759212     | LOC644661 | 9 | 108972698 | 6 | 2.344125 |
| rs10759212     | LOC644661 | 9 | 108972698 | 5 | 1.817056 |
| rs10759212     | LOC644661 | 9 | 108972698 | 3 | 3.100299 |
| rs3204145      | IKBKAP    | 9 | 110691441 | 2 | 3.433416 |
| rs10979601     | IKBKAP    | 9 | 110700672 | 6 | 0.542698 |
| rs10979601     | IKBKAP    | 9 | 110700672 | 7 | 0.701365 |
| rs10979604     | IKBKAP    | 9 | 110703575 | 2 | 7.019769 |
| rs10979605     | IKBKAP    | 9 | 110703614 | 2 | 4.492873 |
| rs12340246     | IKBKAP    | 9 | 110719693 | 7 | 0.705532 |
| rs2275639      | IKBKAP    | 9 | 110735980 | 7 | 0.738917 |
| rs2275640      | IKBKAP    | 9 | 110736035 | 7 | 0.417883 |
| rs10979727     | EPB41L4B  | 9 | 110976609 | 7 | 0.275458 |
| rs10979727     | EPB41L4B  | 9 | 110976609 | 4 | 0.31546  |
| rs10979729     | EPB41L4B  | 9 | 110978747 | 7 | 0.686101 |
| rs3750450      | EPB41L4B  | 9 | 110984870 | 1 | 0.581769 |
| rs3750450      | EPB41L4B  | 9 | 110984870 | 5 | 0.539703 |
| rs3750450      | EPB41L4B  | 9 | 110984870 | 6 | 0.035829 |

|                |             |   |           |   |          |
|----------------|-------------|---|-----------|---|----------|
| rs3750447      | EPB41L4B    | 9 | 110996420 | 7 | 0.766824 |
| rs3750447      | EPB41L4B    | 9 | 110996420 | 4 | 0.618088 |
| rs17803052     | PTPN3       | 9 | 111212495 | 2 | 2.511366 |
| rs17803052     | PTPN3       | 9 | 111212495 | 7 | 0.456006 |
| rs3793524      | PTPN3       | 9 | 111259295 | 7 | 0.360008 |
| rs12376235     | LOC402375   | 9 | 111335604 | 2 | 0.792952 |
| rs12376235     | LOC402375   | 9 | 111335604 | 7 | 1.442955 |
| rs12376235     | LOC402375   | 9 | 111335604 | 3 | 1.572812 |
| rs3741894      | PALM2       | 9 | 111751340 | 4 | 0.693795 |
| SNP9-111939182 | PALM2-AKAP2 | 9 | 111939182 | 2 | 6.193352 |
| SNP9-111939182 | PALM2-AKAP2 | 9 | 111939182 | 5 | 0.622987 |
| SNP9-111939182 | PALM2-AKAP2 | 9 | 111939182 | 7 | 0.21739  |
| rs4978888      | C9orf152    | 9 | 112003523 | 6 | 6.310619 |
| rs4978888      | C9orf152    | 9 | 112003523 | 8 | 0.995291 |
| rs4978888      | C9orf152    | 9 | 112003523 | 3 | 1.182714 |
| rs7041938      | TXNDC8      | 9 | 112131344 | 1 | 2.167402 |
| rs1410049      | SVEP1       | 9 | 112206518 | 7 | 6.737721 |
| rs1410049      | SVEP1       | 9 | 112206518 | 4 | 2.014439 |
| rs1410049      | SVEP1       | 9 | 112206518 | 6 | 6.121155 |
| rs1410049      | SVEP1       | 9 | 112206518 | 2 | 4.503621 |
| rs3739451      | SVEP1       | 9 | 112206613 | 1 | 2.518646 |
| rs2281937      | SVEP1       | 9 | 112208947 | 1 | 3.157221 |
| rs7853155      | SVEP1       | 9 | 112236495 | 3 | 1.540577 |
| rs1889323      | SVEP1       | 9 | 112249016 | 6 | 0.46451  |
| rs1889323      | SVEP1       | 9 | 112249016 | 2 | 2.817624 |
| rs1889323      | SVEP1       | 9 | 112249016 | 4 | 0.093665 |
| rs7038903      | SVEP1       | 9 | 112261068 | 3 | 2.409659 |
| rs872665       | SVEP1       | 9 | 112301304 | 4 | 1.845106 |
| rs872665       | SVEP1       | 9 | 112301304 | 3 | 1.706382 |
| rs872665       | SVEP1       | 9 | 112301304 | 8 | 8.16515  |
| rs872665       | SVEP1       | 9 | 112301304 | 2 | 5.663153 |
| rs872665       | SVEP1       | 9 | 112301304 | 7 | 0.844191 |
| rs3818764      | SVEP1       | 9 | 112316177 | 1 | 6.789428 |
| rs2274419      | MUSK        | 9 | 112577943 | 3 | 2.528347 |
| rs2274419      | MUSK        | 9 | 112577943 | 1 | 1.878042 |
| rs955888       | EDG2        | 9 | 112677483 | 7 | 0.321493 |
| rs955888       | EDG2        | 9 | 112677483 | 2 | 5.375846 |
| rs955888       | EDG2        | 9 | 112677483 | 8 | 7.248286 |
| rs955888       | EDG2        | 9 | 112677483 | 1 | 0.309734 |
| rs6477824      | ZNF483      | 9 | 113327274 | 5 | 0.643465 |
| rs6477824      | ZNF483      | 9 | 113327274 | 3 | 0.389359 |
| rs10759501     | ZNF483      | 9 | 113345397 | 2 | 4.121701 |
| rs10759501     | ZNF483      | 9 | 113345397 | 5 | 0.394303 |
| rs10759501     | ZNF483      | 9 | 113345397 | 4 | 2.160772 |
| rs10759501     | ZNF483      | 9 | 113345397 | 3 | 0.463833 |
| SNP9-113399445 | LTB4DH      | 9 | 113399445 | 2 | 1.878345 |
| SNP9-113399445 | LTB4DH      | 9 | 113399445 | 4 | 0.308285 |

|                |           |   |           |   |          |
|----------------|-----------|---|-----------|---|----------|
| rs7869279      | C9orf84   | 9 | 113494365 | 3 | 0.887531 |
| rs6477845      | C9orf84   | 9 | 113502143 | 3 | 0.016431 |
| rs11791445     | C9orf84   | 9 | 113516569 | 7 | 0.339727 |
| rs12352352     | C9orf84   | 9 | 113524604 | 7 | 0.142832 |
| rs12352352     | C9orf84   | 9 | 113524604 | 8 | 2.718492 |
| rs12352352     | C9orf84   | 9 | 113524604 | 2 | 2.434775 |
| rs10512411     | C9orf84   | 9 | 113530050 | 2 | 3.932814 |
| rs10512411     | C9orf84   | 9 | 113530050 | 7 | 0.470605 |
| rs7470491      | C9orf84   | 9 | 113530129 | 3 | 0.418776 |
| rs2281788      | SUSD1     | 9 | 113843107 | 8 | 7.310449 |
| rs2281790      | SUSD1     | 9 | 113843452 | 4 | 7.248973 |
| rs6575         | ROD1      | 9 | 114020788 | 5 | 7.290025 |
| rs6575         | ROD1      | 9 | 114020788 | 6 | 5.742983 |
| rs6575         | ROD1      | 9 | 114020788 | 4 | 1.433155 |
| rs14255        | ROD1      | 9 | 114021199 | 6 | 3.569104 |
| rs14255        | ROD1      | 9 | 114021199 | 5 | 7.149445 |
| rs7095         | HSDL2     | 9 | 114274215 | 4 | 0.084518 |
| rs2796036      | SNX30     | 9 | 114551866 | 2 | 4.474129 |
| rs2796036      | SNX30     | 9 | 114551866 | 6 | 1.197068 |
| rs2796036      | SNX30     | 9 | 114551866 | 3 | 0.468645 |
| rs2796036      | SNX30     | 9 | 114551866 | 4 | 0.339634 |
| SNP9-114638431 | SNX30     | 9 | 114638431 | 8 | 1.131833 |
| SNP9-114638431 | SNX30     | 9 | 114638431 | 1 | 3.394988 |
| rs16917417     | SNX30     | 9 | 114672719 | 3 | 0.127442 |
| rs16917440     | SLC46A2   | 9 | 114681390 | 1 | 3.607178 |
| rs3802491      | SLC46A2   | 9 | 114692702 | 1 | 1.255179 |
| rs3802491      | SLC46A2   | 9 | 114692702 | 4 | 0.7393   |
| rs13283782     | SLC46A2   | 9 | 114692847 | 3 | 0.231412 |
| rs10513176     | LOC169834 | 9 | 114801042 | 3 | 0.191238 |
| rs10981592     | LOC169834 | 9 | 114804168 | 5 | 0.113725 |
| rs2282076      | ZFP37     | 9 | 114858770 | 8 | 0.900371 |
| rs2282076      | ZFP37     | 9 | 114858770 | 5 | 0.131273 |
| rs1128786      | SLC31A2   | 9 | 114966084 | 7 | 1.13103  |
| rs1128786      | SLC31A2   | 9 | 114966084 | 5 | 0.003333 |
| rs1128786      | SLC31A2   | 9 | 114966084 | 4 | 0.398497 |
| SNP9-114973801 | FKBP15    | 9 | 114973801 | 4 | 0.476755 |
| SNP9-114973801 | FKBP15    | 9 | 114973801 | 1 | 4.01743  |
| rs10465129     | FKBP15    | 9 | 114989977 | 8 | 5.261974 |
| rs1133618      | FKBP15    | 9 | 115008618 | 7 | 1.22574  |
| rs1133618      | FKBP15    | 9 | 115008618 | 2 | 4.55005  |
| rs1133618      | FKBP15    | 9 | 115008618 | 5 | 0.015802 |
| rs2233914      | FKBP15    | 9 | 115023361 | 2 | 6.040877 |
| rs9299214      | CDC26     | 9 | 115075517 | 8 | 1.383388 |
| rs9299214      | CDC26     | 9 | 115075517 | 4 | 0.663256 |
| rs2418249      | PRPF4     | 9 | 115093861 | 8 | 6.966588 |
| rs3750535      | RNF183    | 9 | 115099554 | 8 | 1.145228 |
| rs3750535      | RNF183    | 9 | 115099554 | 4 | 0.388052 |

|                |         |   |           |   |          |
|----------------|---------|---|-----------|---|----------|
| rs3750533      | RNF183  | 9 | 115100042 | 4 | 1.161859 |
| rs16932583     | WDR31   | 9 | 115118192 | 6 | 5.914128 |
| rs41307479     | WDR31   | 9 | 115122468 | 6 | 1.893634 |
| rs10817479     | WDR31   | 9 | 115125244 | 5 | 1.153674 |
| rs818711       | BSPRY   | 9 | 115171913 | 8 | 0.603647 |
| rs17765613     | HDHD3   | 9 | 115175976 | 4 | 6.155419 |
| rs8177822      | ALAD    | 9 | 115189530 | 2 | 2.264693 |
| rs17525042     | POLE3   | 9 | 115212488 | 7 | 1.03495  |
| rs3810925      | C9orf43 | 9 | 115213027 | 7 | 1.609853 |
| SNP9-115226365 | C9orf43 | 9 | 115226365 | 3 | 0.725382 |
| SNP9-115226365 | C9orf43 | 9 | 115226365 | 5 | 1.028824 |
| rs34682731     | RGS3    | 9 | 115331335 | 4 | 1.986237 |
| rs7851718      | RGS3    | 9 | 115343986 | 5 | 7.007119 |
| rs7851718      | RGS3    | 9 | 115343986 | 3 | 0.939267 |
| rs7851937      | RGS3    | 9 | 115344125 | 3 | 1.041684 |
| rs7851937      | RGS3    | 9 | 115344125 | 8 | 0.404557 |
| rs3747813      | RGS3    | 9 | 115367281 | 7 | 5.622447 |
| rs12339493     | RGS3    | 9 | 115382865 | 3 | 0.374491 |
| SNP9-115385939 | RGS3    | 9 | 115385939 | 5 | 5.361562 |
| SNP9-115385939 | RGS3    | 9 | 115385939 | 3 | 0.292932 |
| rs3810927      | RGS3    | 9 | 115386108 | 1 | 5.014909 |
| rs12350531     | RGS3    | 9 | 115396194 | 7 | 0.604328 |
| rs12350531     | RGS3    | 9 | 115396194 | 1 | 0.025776 |
| rs12350531     | RGS3    | 9 | 115396194 | 3 | 0.289717 |
| rs7030167      | ZNF618  | 9 | 115830982 | 3 | 0.278948 |
| rs7030167      | ZNF618  | 9 | 115830982 | 6 | 5.258834 |
| rs12378906     | ZNF618  | 9 | 115850025 | 7 | 0.491313 |
| rs12554621     | NULL    | 9 | 115856601 | 2 | 0.432238 |
| rs12554621     | NULL    | 9 | 115856601 | 1 | 0.418342 |
| rs12554621     | NULL    | 9 | 115856601 | 3 | 0.747297 |
| rs2567707      | COL27A1 | 9 | 115969921 | 7 | 3.349374 |
| rs2567706      | COL27A1 | 9 | 115970015 | 7 | 0.911306 |
| rs2567706      | COL27A1 | 9 | 115970015 | 4 | 1.51613  |
| rs2241671      | COL27A1 | 9 | 115970920 | 1 | 4.900235 |
| rs2241671      | COL27A1 | 9 | 115970920 | 4 | 0.123567 |
| rs2808770      | COL27A1 | 9 | 115971266 | 7 | 5.89232  |
| rs2808770      | COL27A1 | 9 | 115971266 | 4 | 0.020984 |
| rs2808771      | COL27A1 | 9 | 115971558 | 7 | 0.503395 |
| rs2808771      | COL27A1 | 9 | 115971558 | 4 | 0.43625  |
| rs4143245      | COL27A1 | 9 | 116072843 | 5 | 0.409344 |
| rs4143245      | COL27A1 | 9 | 116072843 | 4 | 0.30621  |
| rs4143245      | COL27A1 | 9 | 116072843 | 3 | 0.038025 |
| rs4143245      | COL27A1 | 9 | 116072843 | 8 | 1.548378 |
| rs4143245      | COL27A1 | 9 | 116072843 | 6 | 0.231665 |
| rs4143245      | COL27A1 | 9 | 116072843 | 1 | 0.427356 |
| rs1388095      | COL27A1 | 9 | 116109816 | 1 | 4.193126 |
| rs2250242      | AKNA    | 9 | 116143794 | 5 | 0.090629 |

|                |           |   |           |   |          |
|----------------|-----------|---|-----------|---|----------|
| rs3748176      | AKNA      | 9 | 116164552 | 5 | 0.403381 |
| rs3748176      | AKNA      | 9 | 116164552 | 1 | 5.249444 |
| rs1058278      | C9orf91   | 9 | 116446422 | 1 | 3.512267 |
| rs3810936      | TNFSF15   | 9 | 116592706 | 6 | 0.36393  |
| rs12347433     | TNC       | 9 | 116837418 | 6 | 1.080803 |
| rs12347433     | TNC       | 9 | 116837418 | 4 | 0.264195 |
| rs12347433     | TNC       | 9 | 116837418 | 3 | 2.3035   |
| rs12347433     | TNC       | 9 | 116837418 | 5 | 0.957848 |
| rs2104772      | TNC       | 9 | 116848606 | 2 | 6.351362 |
| rs2104772      | TNC       | 9 | 116848606 | 7 | 0.36583  |
| rs17819466     | TNC       | 9 | 116859257 | 8 | 0.641105 |
| rs17819466     | TNC       | 9 | 116859257 | 4 | 4.487885 |
| SNP9-116875720 | TNC       | 9 | 116875720 | 7 | 1.036359 |
| SNP9-116875720 | TNC       | 9 | 116875720 | 2 | 6.940724 |
| SNP9-116875720 | TNC       | 9 | 116875720 | 3 | 1.500835 |
| SNP9-116875720 | TNC       | 9 | 116875720 | 1 | 1.165933 |
| SNP9-116886401 | TNC       | 9 | 116886401 | 8 | 0.546374 |
| SNP9-116886401 | TNC       | 9 | 116886401 | 5 | 0.290465 |
| SNP9-116886401 | TNC       | 9 | 116886401 | 1 | 4.015336 |
| SNP9-116886401 | TNC       | 9 | 116886401 | 6 | 0.099564 |
| rs944510       | TNC       | 9 | 116892843 | 8 | 7.486469 |
| rs944510       | TNC       | 9 | 116892843 | 6 | 4.28214  |
| rs944510       | TNC       | 9 | 116892843 | 5 | 5.859266 |
| rs944510       | TNC       | 9 | 116892843 | 1 | 5.42493  |
| rs10982521     | TNC       | 9 | 116892924 | 4 | 8.252887 |
| rs1989775      | C9orf27   | 9 | 117690510 | 1 | 5.148893 |
| rs1661300      | TRIM32    | 9 | 118501096 | 6 | 0.689759 |
| rs3761845      | ASTN2     | 9 | 118810301 | 5 | 0.412869 |
| rs4986791      | TLR4      | 9 | 119515423 | 5 | 0.073212 |
| rs10984217     | LOC442434 | 9 | 120564068 | 3 | 0.55751  |
| rs10984217     | LOC442434 | 9 | 120564068 | 1 | 1.242635 |
| rs10984217     | LOC442434 | 9 | 120564068 | 4 | 1.605974 |
| rs7029069      | LOC442434 | 9 | 120564106 | 1 | 2.594479 |
| rs7029069      | LOC442434 | 9 | 120564106 | 5 | 1.966607 |
| rs7849696      | LOC442434 | 9 | 120566091 | 3 | 0.408657 |
| rs1472883      | LOC442434 | 9 | 120566228 | 7 | 0.148058 |
| rs1472883      | LOC442434 | 9 | 120566228 | 5 | 1.740384 |
| rs1472883      | LOC442434 | 9 | 120566228 | 1 | 1.429921 |
| rs3739822      | CDK5RAP2  | 9 | 122202874 | 2 | 5.059011 |
| rs3780679      | CDK5RAP2  | 9 | 122245733 | 2 | 5.629279 |
| SNP9-122279464 | CDK5RAP2  | 9 | 122279464 | 8 | 0.329582 |
| rs4836822      | CDK5RAP2  | 9 | 122330857 | 3 | 0.053203 |
| rs3750494      | CDK5RAP2  | 9 | 122341167 | 3 | 0.858132 |
| rs9886724      | TRAF1     | 9 | 122704840 | 7 | 0.091723 |
| rs9886724      | TRAF1     | 9 | 122704840 | 2 | 1.328106 |
| rs9886724      | TRAF1     | 9 | 122704840 | 1 | 0.54206  |
| rs9886724      | TRAF1     | 9 | 122704840 | 6 | 3.304524 |



|                |        |   |           |   |          |
|----------------|--------|---|-----------|---|----------|
| rs2239657      | TRAF1  | 9 | 122711341 | 6 | 1.003807 |
| rs2239657      | TRAF1  | 9 | 122711341 | 5 | 1.685506 |
| rs2239657      | TRAF1  | 9 | 122711341 | 7 | 1.030805 |
| rs2239657      | TRAF1  | 9 | 122711341 | 1 | 0.816235 |
| rs2239657      | TRAF1  | 9 | 122711341 | 2 | 1.120331 |
| rs2239657      | TRAF1  | 9 | 122711341 | 4 | 3.952249 |
| rs34119250     | TRAF1  | 9 | 122728038 | 5 | 0.717699 |
| rs17611        | C5     | 9 | 122809021 | 7 | 0.136979 |
| rs17611        | C5     | 9 | 122809021 | 4 | 10.16889 |
| rs17611        | C5     | 9 | 122809021 | 1 | 4.731477 |
| SNP9-122822120 | C5     | 9 | 122822120 | 8 | 5.152308 |
| rs17216529     | C5     | 9 | 122840039 | 4 | 0.196117 |
| rs17216529     | C5     | 9 | 122840039 | 1 | 0.306164 |
| rs10818503     | CEP110 | 9 | 122890591 | 2 | 5.229843 |
| rs10818503     | CEP110 | 9 | 122890591 | 4 | 0.277049 |
| rs10818503     | CEP110 | 9 | 122890591 | 1 | 0.442147 |
| rs9408926      | CEP110 | 9 | 122954695 | 6 | 4.988095 |
| rs3736855      | CEP110 | 9 | 122956841 | 1 | 2.546701 |
| rs3736855      | CEP110 | 9 | 122956841 | 4 | 0.901789 |
| SNP9-122969591 | CEP110 | 9 | 122969591 | 6 | 0.024184 |
| SNP9-122969591 | CEP110 | 9 | 122969591 | 2 | 0.956149 |
| SNP9-123128729 | GSN    | 9 | 123128729 | 3 | 0.047276 |
| SNP9-123128729 | GSN    | 9 | 123128729 | 7 | 0.176076 |
| SNP9-123129513 | GSN    | 9 | 123129513 | 7 | 0.639858 |
| SNP9-123129513 | GSN    | 9 | 123129513 | 3 | 1.011276 |
| SNP9-123895032 | TTLL11 | 9 | 123895032 | 6 | 5.120058 |
| SNP9-123895032 | TTLL11 | 9 | 123895032 | 5 | 0.07137  |
| SNP9-123895032 | TTLL11 | 9 | 123895032 | 3 | 0.702882 |
| rs10306196     | PTGS1  | 9 | 124197137 | 6 | 3.330253 |
| rs4836891      | OR1J2  | 9 | 124313395 | 3 | 0.001921 |
| rs4836891      | OR1J2  | 9 | 124313395 | 6 | 0.341248 |
| rs1341043      | OR1N2  | 9 | 124355863 | 1 | 1.089965 |
| rs1341043      | OR1N2  | 9 | 124355863 | 2 | 0.501976 |
| rs1341043      | OR1N2  | 9 | 124355863 | 7 | 0.58557  |
| rs1341043      | OR1N2  | 9 | 124355863 | 8 | 0.488112 |
| rs1341044      | OR1N2  | 9 | 124356000 | 8 | 2.076536 |
| rs1341044      | OR1N2  | 9 | 124356000 | 1 | 2.67342  |
| rs1341044      | OR1N2  | 9 | 124356000 | 2 | 3.834769 |
| rs1341044      | OR1N2  | 9 | 124356000 | 6 | 2.358972 |
| rs1411272      | OR1N2  | 9 | 124356171 | 1 | 0.308996 |
| rs1411272      | OR1N2  | 9 | 124356171 | 6 | 0.647229 |
| rs1411272      | OR1N2  | 9 | 124356171 | 2 | 0.473922 |
| rs10739614     | OR1L8  | 9 | 124369946 | 6 | 0.349622 |
| rs10739614     | OR1L8  | 9 | 124369946 | 1 | 0.019531 |
| rs10739614     | OR1L8  | 9 | 124369946 | 2 | 0.330144 |
| rs10739614     | OR1L8  | 9 | 124369946 | 7 | 0.19626  |
| rs10985702     | OR1L8  | 9 | 124370005 | 6 | 1.008175 |

|                |           |   |           |   |          |
|----------------|-----------|---|-----------|---|----------|
| rs10985702     | OR1L8     | 9 | 124370005 | 8 | 0.188429 |
| rs10985704     | OR1L8     | 9 | 124370499 | 2 | 1.001953 |
| rs10985704     | OR1L8     | 9 | 124370499 | 6 | 0.274085 |
| rs10985704     | OR1L8     | 9 | 124370499 | 7 | 0.100108 |
| rs10985704     | OR1L8     | 9 | 124370499 | 1 | 1.200955 |
| rs10985704     | OR1L8     | 9 | 124370499 | 8 | 0.035066 |
| rs1999182      | OR1L8     | 9 | 124370560 | 8 | 0.754496 |
| rs1999182      | OR1L8     | 9 | 124370560 | 6 | 0.041715 |
| rs1999182      | OR1L8     | 9 | 124370560 | 1 | 0.436392 |
| rs1999182      | OR1L8     | 9 | 124370560 | 7 | 1.408643 |
| rs1999182      | OR1L8     | 9 | 124370560 | 2 | 0.893928 |
| rs972925       | OR1Q1     | 9 | 124416908 | 5 | 0.350709 |
| rs972925       | OR1Q1     | 9 | 124416908 | 4 | 4.050265 |
| rs972925       | OR1Q1     | 9 | 124416908 | 1 | 3.69732  |
| rs1329957      | OR1Q1     | 9 | 124417326 | 4 | 0.373079 |
| rs1329957      | OR1Q1     | 9 | 124417326 | 1 | 2.799151 |
| rs1329957      | OR1Q1     | 9 | 124417326 | 5 | 0.313701 |
| rs1329957      | OR1Q1     | 9 | 124417326 | 7 | 0.07965  |
| rs1476860      | OR1B1     | 9 | 124431062 | 8 | 3.984562 |
| rs1536929      | OR1B1     | 9 | 124431190 | 1 | 4.348625 |
| rs1536929      | OR1B1     | 9 | 124431190 | 4 | 0.825159 |
| rs1536929      | OR1B1     | 9 | 124431190 | 5 | 0.670105 |
| rs1536929      | OR1B1     | 9 | 124431190 | 6 | 0.660964 |
| rs1536928      | OR1B1     | 9 | 124431230 | 8 | 0.297271 |
| rs1536928      | OR1B1     | 9 | 124431230 | 3 | 0.299753 |
| rs1536928      | OR1B1     | 9 | 124431230 | 1 | 2.133013 |
| rs1536928      | OR1B1     | 9 | 124431230 | 4 | 0.951512 |
| rs1536928      | OR1B1     | 9 | 124431230 | 5 | 0.387174 |
| SNP9-125168032 | CRB2      | 9 | 125168032 | 5 | 0.215034 |
| rs1048616      | DENND1A   | 9 | 125182054 | 7 | 0.283949 |
| rs3739837      | DENND1A   | 9 | 125183483 | 1 | 4.322503 |
| rs3739837      | DENND1A   | 9 | 125183483 | 4 | 0.207951 |
| rs2065221      | LOC613206 | 9 | 126060649 | 8 | 0.056391 |
| rs2065221      | LOC613206 | 9 | 126060649 | 3 | 1.417842 |
| rs2065221      | LOC613206 | 9 | 126060649 | 2 | 3.177044 |
| rs2065221      | LOC613206 | 9 | 126060649 | 5 | 0.053216 |
| rs2065221      | LOC613206 | 9 | 126060649 | 7 | 0.389367 |
| rs2065221      | LOC613206 | 9 | 126060649 | 4 | 0.4065   |
| rs2416         | NEK6      | 9 | 126153481 | 8 | 0.394899 |
| rs7861556      | GPR144    | 9 | 126255165 | 3 | 0.799883 |
| rs7861556      | GPR144    | 9 | 126255165 | 1 | 1.195293 |
| rs10760365     | GPR144    | 9 | 126270712 | 1 | 0.059608 |
| rs10760365     | GPR144    | 9 | 126270712 | 5 | 0.155311 |
| rs10760365     | GPR144    | 9 | 126270712 | 4 | 0.087485 |
| rs10760365     | GPR144    | 9 | 126270712 | 3 | 0.518306 |
| rs915034       | NR5A1     | 9 | 126284776 | 3 | 0.001967 |
| rs915034       | NR5A1     | 9 | 126284776 | 1 | 0.16159  |

|            |           |   |           |   |          |
|------------|-----------|---|-----------|---|----------|
| rs1051358  | ARPC5L    | 9 | 126679516 | 4 | 0.5877   |
| rs1051358  | ARPC5L    | 9 | 126679516 | 5 | 0.01436  |
| rs17327817 | GOLGA1    | 9 | 126681957 | 3 | 0.836728 |
| rs17327817 | GOLGA1    | 9 | 126681957 | 8 | 7.803924 |
| rs17327817 | GOLGA1    | 9 | 126681957 | 5 | 0.251293 |
| rs764304   | C9orf126  | 9 | 126804126 | 3 | 0.876214 |
| rs764304   | C9orf126  | 9 | 126804126 | 5 | 3.62661  |
| rs459311   | LOC645842 | 9 | 126992031 | 1 | 0.972658 |
| rs459311   | LOC645842 | 9 | 126992031 | 3 | 1.060962 |
| rs459311   | LOC645842 | 9 | 126992031 | 6 | 0.172146 |
| rs16927965 | RABEPK    | 9 | 127015475 | 3 | 0.197708 |
| rs16927965 | RABEPK    | 9 | 127015475 | 4 | 0.937219 |
| rs16927965 | RABEPK    | 9 | 127015475 | 5 | 1.538414 |
| rs722538   | FAM125B   | 9 | 128197823 | 3 | 1.030617 |
| rs722538   | FAM125B   | 9 | 128197823 | 6 | 6.24618  |
| rs722538   | FAM125B   | 9 | 128197823 | 5 | 0.176359 |
| rs11793111 | FAM125B   | 9 | 128198192 | 5 | 0.270768 |
| rs2241011  | FAM125B   | 9 | 128199379 | 3 | 0.017555 |
| rs2241011  | FAM125B   | 9 | 128199379 | 5 | 0.285865 |
| rs2241011  | FAM125B   | 9 | 128199379 | 6 | 0.045333 |
| rs2241011  | FAM125B   | 9 | 128199379 | 8 | 0.426892 |
| rs2241011  | FAM125B   | 9 | 128199379 | 4 | 0.476356 |
| rs2052156  | FAM125B   | 9 | 128199704 | 1 | 1.44227  |
| rs3814127  | FAM125B   | 9 | 128305563 | 8 | 0.527297 |
| rs3814127  | FAM125B   | 9 | 128305563 | 7 | 1.60111  |
| rs3814127  | FAM125B   | 9 | 128305563 | 3 | 0.760441 |
| rs3814126  | FAM125B   | 9 | 128305618 | 3 | 0.076655 |
| rs3814126  | FAM125B   | 9 | 128305618 | 1 | 2.314265 |
| rs3814126  | FAM125B   | 9 | 128305618 | 4 | 0.760194 |
| rs7861319  | FAM125B   | 9 | 128308838 | 4 | 0.230424 |
| rs7861319  | FAM125B   | 9 | 128308838 | 8 | 1.328279 |
| rs7861319  | FAM125B   | 9 | 128308838 | 7 | 0.23476  |
| rs13295990 | LMX1B     | 9 | 128495408 | 3 | 0.166611 |
| rs13295990 | LMX1B     | 9 | 128495408 | 7 | 0.651211 |
| rs13295990 | LMX1B     | 9 | 128495408 | 6 | 2.124265 |
| rs13295990 | LMX1B     | 9 | 128495408 | 5 | 0.09734  |
| rs10819246 | ZBTB34    | 9 | 128683117 | 7 | 1.622202 |
| rs10819246 | ZBTB34    | 9 | 128683117 | 5 | 5.076562 |
| rs3118832  | LOC729721 | 9 | 128716872 | 7 | 0.674323 |
| rs3118832  | LOC729721 | 9 | 128716872 | 5 | 0.310032 |
| rs8838     | ANGPTL2   | 9 | 128889701 | 6 | 2.318534 |
| rs8838     | ANGPTL2   | 9 | 128889701 | 1 | 2.905605 |
| rs8838     | ANGPTL2   | 9 | 128889701 | 5 | 2.147597 |
| rs8838     | ANGPTL2   | 9 | 128889701 | 3 | 0.947785 |
| rs2297866  | ANGPTL2   | 9 | 128894020 | 5 | 2.246324 |
| rs2297866  | ANGPTL2   | 9 | 128894020 | 3 | 0.399431 |
| rs1058266  | RALGPS1   | 9 | 129024929 | 6 | 3.747189 |

|                |          |   |           |   |          |
|----------------|----------|---|-----------|---|----------|
| SNP9-129156479 | GARNL3   | 9 | 129156479 | 2 | 3.700167 |
| SNP9-129205794 | SLC2A8   | 9 | 129205794 | 7 | 0.335684 |
| rs3088163      | SLC2A8   | 9 | 129209821 | 7 | 0.700653 |
| rs3088163      | SLC2A8   | 9 | 129209821 | 1 | 5.708051 |
| rs13292096     | ZNF79    | 9 | 129231007 | 5 | 0.316592 |
| rs13292096     | ZNF79    | 9 | 129231007 | 1 | 3.395975 |
| rs4240420      | FAM129B  | 9 | 129381074 | 7 | 0.570066 |
| rs522328       | C9orf117 | 9 | 129514832 | 7 | 0.774932 |
| rs482095       | TTC16    | 9 | 129533334 | 7 | 1.043217 |
| rs505268       | TTC16    | 9 | 129533545 | 7 | 0.899427 |
| rs534652       | TOR2A    | 9 | 129534488 | 7 | 0.798767 |
| rs564754       | TOR2A    | 9 | 129535454 | 7 | 1.228626 |
| rs514024       | SH2D3C   | 9 | 129543891 | 5 | 0.926452 |
| rs514024       | SH2D3C   | 9 | 129543891 | 7 | 1.272508 |
| rs514024       | SH2D3C   | 9 | 129543891 | 3 | 1.060044 |
| rs8083         | CDK9     | 9 | 129592000 | 1 | 0.536939 |
| rs8083         | CDK9     | 9 | 129592000 | 3 | 0.419733 |
| rs8083         | CDK9     | 9 | 129592000 | 2 | 6.464406 |
| rs6781         | DPM2     | 9 | 129737864 | 5 | 0.029639 |
| rs6781         | DPM2     | 9 | 129737864 | 8 | 6.226412 |
| rs3003609      | DNM1     | 9 | 130024576 | 4 | 3.377394 |
| rs3003609      | DNM1     | 9 | 130024576 | 3 | 0.276963 |
| rs3003609      | DNM1     | 9 | 130024576 | 1 | 5.356839 |
| rs7258         | CERCAM   | 9 | 130236516 | 5 | 1.023286 |
| rs7258         | CERCAM   | 9 | 130236516 | 3 | 1.024443 |
| rs7259         | CERCAM   | 9 | 130236525 | 3 | 1.834598 |
| rs7259         | CERCAM   | 9 | 130236525 | 5 | 1.864048 |
| rs3750333      | SPTAN1   | 9 | 130419819 | 2 | 5.312304 |
| rs11539209     | ZDHHC12  | 9 | 130523372 | 6 | 1.10295  |
| rs11539209     | ZDHHC12  | 9 | 130523372 | 4 | 0.611088 |
| SNP9-130605375 | TBC1D13  | 9 | 130605375 | 6 | 0.127027 |
| SNP9-130605375 | TBC1D13  | 9 | 130605375 | 4 | 0.440975 |
| rs7033070      | C9orf114 | 9 | 130626195 | 4 | 1.232606 |
| rs6478854      | C9orf114 | 9 | 130628709 | 6 | 0.10741  |
| rs6478854      | C9orf114 | 9 | 130628709 | 4 | 0.084066 |
| rs10988134     | CCBL1    | 9 | 130635228 | 6 | 1.069198 |
| rs10988134     | CCBL1    | 9 | 130635228 | 4 | 0.417634 |
| rs3750318      | LRR8A    | 9 | 130710773 | 5 | 0.475436 |
| rs11542344     | LRR8A    | 9 | 130719998 | 1 | 3.490463 |
| rs751340       | PHYHD1   | 9 | 130729182 | 2 | 3.61361  |
| rs751340       | PHYHD1   | 9 | 130729182 | 8 | 6.179027 |
| rs751340       | PHYHD1   | 9 | 130729182 | 4 | 4.96894  |
| rs751340       | PHYHD1   | 9 | 130729182 | 6 | 7.669844 |
| rs751340       | PHYHD1   | 9 | 130729182 | 3 | 1.015946 |
| rs2273866      | PHYHD1   | 9 | 130742712 | 4 | 0.125799 |
| rs2273866      | PHYHD1   | 9 | 130742712 | 6 | 1.359146 |
| rs2273866      | PHYHD1   | 9 | 130742712 | 2 | 0.125964 |

|                |           |   |           |   |          |
|----------------|-----------|---|-----------|---|----------|
| rs2273866      | PHYHD1    | 9 | 130742712 | 3 | 0.195855 |
| rs2273866      | PHYHD1    | 9 | 130742712 | 8 | 6.041235 |
| rs11564096     | DOLPP1    | 9 | 130886778 | 8 | 0.296102 |
| rs3118625      | PPP2R4    | 9 | 130913077 | 6 | 0.378806 |
| rs3118625      | PPP2R4    | 9 | 130913077 | 7 | 0.132885 |
| rs3118625      | PPP2R4    | 9 | 130913077 | 8 | 0.721228 |
| rs3118625      | PPP2R4    | 9 | 130913077 | 5 | 1.309036 |
| rs2480452      | PPP2R4    | 9 | 130949557 | 5 | 0.004024 |
| rs2480452      | PPP2R4    | 9 | 130949557 | 3 | 0.257631 |
| SNP9-130949914 | PPP2R4    | 9 | 130949914 | 6 | 0.142545 |
| SNP9-130949914 | PPP2R4    | 9 | 130949914 | 5 | 2.846447 |
| SNP9-130949914 | PPP2R4    | 9 | 130949914 | 2 | 3.102496 |
| SNP9-130949914 | PPP2R4    | 9 | 130949914 | 7 | 0.127754 |
| rs4713         | PPP2R4    | 9 | 130950626 | 5 | 0.288206 |
| rs4713         | PPP2R4    | 9 | 130950626 | 2 | 2.388898 |
| rs4713         | PPP2R4    | 9 | 130950626 | 8 | 6.517242 |
| rs4713         | PPP2R4    | 9 | 130950626 | 6 | 7.470672 |
| rs4713         | PPP2R4    | 9 | 130950626 | 7 | 0.241607 |
| rs913770       | C9orf106  | 9 | 131124442 | 3 | 0.011064 |
| rs6478890      | C9orf106  | 9 | 131125058 | 5 | 0.178078 |
| rs6478890      | C9orf106  | 9 | 131125058 | 3 | 1.129815 |
| rs6478890      | C9orf106  | 9 | 131125058 | 4 | 0.371553 |
| rs7034728      | C9orf106  | 9 | 131125114 | 3 | 1.828338 |
| rs913772       | C9orf106  | 9 | 131125456 | 6 | 0.686046 |
| rs913772       | C9orf106  | 9 | 131125456 | 3 | 0.354697 |
| SNP9-131415253 | C9orf50   | 9 | 131415253 | 1 | 1.320893 |
| rs918165       | C9orf50   | 9 | 131417721 | 6 | 0.706668 |
| rs16936946     | TOR1B     | 9 | 131609353 | 2 | 6.364392 |
| rs3814547      | C9orf78   | 9 | 131636842 | 4 | 1.29391  |
| rs709611       | FREQ      | 9 | 132038180 | 1 | 5.191463 |
| rs11552451     | FREQ      | 9 | 132038378 | 1 | 5.240579 |
| rs10901072     | ASS1      | 9 | 132336047 | 5 | 0.510078 |
| rs10901072     | ASS1      | 9 | 132336047 | 3 | 1.354422 |
| rs4740197      | LOC158301 | 9 | 132443241 | 4 | 0.722824 |
| rs2229070      | ABL1      | 9 | 132749850 | 5 | 0.550127 |
| rs2229070      | ABL1      | 9 | 132749850 | 4 | 3.034534 |
| rs3847193      | QRFP      | 9 | 132758990 | 6 | 2.106704 |
| rs3847193      | QRFP      | 9 | 132758990 | 8 | 2.463515 |
| rs3847193      | QRFP      | 9 | 132758990 | 5 | 0.501266 |
| rs11789517     | FIBCD1    | 9 | 132767814 | 5 | 0.433182 |
| rs12349966     | LAMC3     | 9 | 132918166 | 3 | 0.768206 |
| rs12349966     | LAMC3     | 9 | 132918166 | 5 | 1.329184 |
| rs12349966     | LAMC3     | 9 | 132918166 | 1 | 1.57275  |
| rs3739510      | LAMC3     | 9 | 132926392 | 8 | 0.011114 |
| rs3739510      | LAMC3     | 9 | 132926392 | 1 | 3.569088 |
| rs3739510      | LAMC3     | 9 | 132926392 | 3 | 0.819242 |
| rs10901345     | LAMC3     | 9 | 132936736 | 5 | 1.374712 |

|                |           |   |           |   |          |
|----------------|-----------|---|-----------|---|----------|
| rs10901345     | LAMC3     | 9 | 132936736 | 3 | 1.926407 |
| rs2275140      | LAMC3     | 9 | 132937870 | 1 | 0.127591 |
| rs818056       | LAMC3     | 9 | 132957061 | 7 | 1.298581 |
| rs818056       | LAMC3     | 9 | 132957061 | 5 | 0.942044 |
| rs818056       | LAMC3     | 9 | 132957061 | 3 | 1.351111 |
| rs710074       | LAMC3     | 9 | 132957116 | 3 | 1.425569 |
| rs710074       | LAMC3     | 9 | 132957116 | 7 | 0.849692 |
| rs353510       | C9orf58   | 9 | 132986324 | 4 | 0.410236 |
| rs353510       | C9orf58   | 9 | 132986324 | 5 | 0.224481 |
| rs1043169      | C9orf58   | 9 | 132987364 | 4 | 0.118893 |
| rs9966         | FAM78A    | 9 | 133126069 | 1 | 0.544327 |
| rs9966         | FAM78A    | 9 | 133126069 | 7 | 0.34384  |
| rs9966         | FAM78A    | 9 | 133126069 | 5 | 0.486563 |
| rs9966         | FAM78A    | 9 | 133126069 | 2 | 1.208268 |
| rs9966         | FAM78A    | 9 | 133126069 | 8 | 0.273962 |
| rs4740427      | FAM78A    | 9 | 133141684 | 8 | 0.463186 |
| rs4740427      | FAM78A    | 9 | 133141684 | 3 | 1.305207 |
| rs4740427      | FAM78A    | 9 | 133141684 | 7 | 0.998272 |
| rs4740427      | FAM78A    | 9 | 133141684 | 1 | 3.464986 |
| rs7041276      | PPAPDC3   | 9 | 133155069 | 7 | 0.795893 |
| rs7041276      | PPAPDC3   | 9 | 133155069 | 1 | 1.485808 |
| rs7041276      | PPAPDC3   | 9 | 133155069 | 8 | 0.341528 |
| rs7029366      | PPAPDC3   | 9 | 133155189 | 8 | 1.649988 |
| rs7029366      | PPAPDC3   | 9 | 133155189 | 3 | 2.385025 |
| rs7029366      | PPAPDC3   | 9 | 133155189 | 1 | 0.455386 |
| rs7029366      | PPAPDC3   | 9 | 133155189 | 7 | 1.783783 |
| rs2966332      | PPAPDC3   | 9 | 133173200 | 7 | 0.106095 |
| rs2986606      | PPAPDC3   | 9 | 133173324 | 7 | 1.220662 |
| rs2483476      | PPAPDC3   | 9 | 133173734 | 4 | 5.389005 |
| rs2483476      | PPAPDC3   | 9 | 133173734 | 8 | 4.377651 |
| rs1541122      | PPAPDC3   | 9 | 133174294 | 4 | 0.742638 |
| rs1541122      | PPAPDC3   | 9 | 133174294 | 8 | 1.658436 |
| rs1541122      | PPAPDC3   | 9 | 133174294 | 7 | 0.09688  |
| SNP9-133311776 | KIAA0515  | 9 | 133311776 | 8 | 0.517708 |
| SNP9-133324409 | KIAA0515  | 9 | 133324409 | 5 | 0.165259 |
| SNP9-133340279 | KIAA0515  | 9 | 133340279 | 4 | 0.3046   |
| SNP9-133340279 | KIAA0515  | 9 | 133340279 | 6 | 7.448488 |
| SNP9-133340279 | KIAA0515  | 9 | 133340279 | 8 | 0.020359 |
| SNP9-133360986 | KIAA0515  | 9 | 133360986 | 6 | 0.059704 |
| rs3887873      | POMT1     | 9 | 133375256 | 4 | 2.845202 |
| rs2296949      | POMT1     | 9 | 133375257 | 6 | 0.646712 |
| rs4740164      | POMT1     | 9 | 133376602 | 6 | 4.462221 |
| rs3739494      | POMT1     | 9 | 133377309 | 6 | 4.418641 |
| rs3739495      | POMT1     | 9 | 133388355 | 6 | 0.059995 |
| rs10793885     | POMT1     | 9 | 133388592 | 6 | 0.777844 |
| rs4740167      | LOC642515 | 9 | 133423284 | 5 | 1.26996  |
| rs11243480     | RAPGEF1   | 9 | 133575002 | 6 | 0.371692 |

|                |          |   |           |   |          |
|----------------|----------|---|-----------|---|----------|
| rs11243480     | RAPGEF1  | 9 | 133575002 | 5 | 0.301862 |
| rs11243480     | RAPGEF1  | 9 | 133575002 | 7 | 1.345101 |
| rs11243480     | RAPGEF1  | 9 | 133575002 | 1 | 0.158551 |
| rs2149171      | NTNG2    | 9 | 134092075 | 5 | 0.068606 |
| rs2149171      | NTNG2    | 9 | 134092075 | 7 | 0.462691 |
| rs562350       | FLJ46082 | 9 | 134364719 | 5 | 0.160884 |
| rs562350       | FLJ46082 | 9 | 134364719 | 1 | 0.263853 |
| rs562350       | FLJ46082 | 9 | 134364719 | 6 | 2.515139 |
| rs2231403      | C9orf98  | 9 | 134743831 | 1 | 4.303122 |
| rs2231403      | C9orf98  | 9 | 134743831 | 6 | 1.33734  |
| rs2231403      | C9orf98  | 9 | 134743831 | 3 | 1.215148 |
| rs7862221      | TSC1     | 9 | 134772042 | 8 | 2.19747  |
| rs667805       | GFI1B    | 9 | 134856514 | 6 | 0.914907 |
| rs637435       | GTF3C5   | 9 | 134922056 | 3 | 0.638298 |
| rs7324         | GTF3C5   | 9 | 134923582 | 8 | 7.388444 |
| rs7324         | GTF3C5   | 9 | 134923582 | 1 | 0.135391 |
| rs7324         | GTF3C5   | 9 | 134923582 | 7 | 0.115606 |
| rs1062356      | RALGDS   | 9 | 134963900 | 5 | 0.741743 |
| rs1062356      | RALGDS   | 9 | 134963900 | 4 | 0.37131  |
| rs1062356      | RALGDS   | 9 | 134963900 | 6 | 0.906173 |
| rs2073924      | GBGT1    | 9 | 135027563 | 5 | 0.794967 |
| rs2073923      | GBGT1    | 9 | 135027666 | 2 | 2.130284 |
| rs2073923      | GBGT1    | 9 | 135027666 | 7 | 0.240404 |
| rs2073923      | GBGT1    | 9 | 135027666 | 5 | 0.078445 |
| rs2073923      | GBGT1    | 9 | 135027666 | 8 | 0.418945 |
| rs11244035     | OBP2B    | 9 | 135071140 | 3 | 0.078729 |
| rs4507838      | LCN1L1   | 9 | 135092020 | 8 | 4.905166 |
| rs8176749      | ABO      | 9 | 135121009 | 4 | 3.592316 |
| rs8176745      | ABO      | 9 | 135121168 | 5 | 1.082968 |
| rs8176745      | ABO      | 9 | 135121168 | 8 | 0.511519 |
| rs8176745      | ABO      | 9 | 135121168 | 1 | 3.227532 |
| rs8176743      | ABO      | 9 | 135121236 | 4 | 2.588633 |
| rs8176742      | ABO      | 9 | 135121258 | 5 | 0.517375 |
| rs8176742      | ABO      | 9 | 135121258 | 8 | 0.359555 |
| rs8176742      | ABO      | 9 | 135121258 | 1 | 3.641313 |
| rs8176741      | ABO      | 9 | 135121282 | 4 | 1.764854 |
| rs8176740      | ABO      | 9 | 135121293 | 5 | 0.618167 |
| rs8176740      | ABO      | 9 | 135121293 | 8 | 0.213531 |
| rs8176740      | ABO      | 9 | 135121293 | 1 | 3.922985 |
| rs8176739      | ABO      | 9 | 135121344 | 7 | 0.640704 |
| rs8176739      | ABO      | 9 | 135121344 | 5 | 0.723527 |
| rs8176720      | ABO      | 9 | 135122694 | 1 | 3.460869 |
| rs8176720      | ABO      | 9 | 135122694 | 5 | 0.998763 |
| rs8176720      | ABO      | 9 | 135122694 | 8 | 0.963785 |
| rs8176720      | ABO      | 9 | 135122694 | 4 | 2.203547 |
| SNP9-135122729 | ABO      | 9 | 135122729 | 3 | 0.523914 |
| SNP9-135122729 | ABO      | 9 | 135122729 | 6 | 0.287525 |

|                |          |   |           |   |          |
|----------------|----------|---|-----------|---|----------|
| SNP9-135122729 | ABO      | 9 | 135122729 | 4 | 0.909323 |
| rs512770       | ABO      | 9 | 135123327 | 1 | 5.443033 |
| rs512770       | ABO      | 9 | 135123327 | 7 | 0.45736  |
| rs549446       | ABO      | 9 | 135125059 | 5 | 0.449056 |
| rs549446       | ABO      | 9 | 135125059 | 1 | 4.481977 |
| rs688976       | ABO      | 9 | 135126591 | 8 | 1.523368 |
| rs688976       | ABO      | 9 | 135126591 | 5 | 0.020306 |
| rs688976       | ABO      | 9 | 135126591 | 1 | 6.074163 |
| rs10793964     | SURF6    | 9 | 135188410 | 1 | 5.127559 |
| rs10793964     | SURF6    | 9 | 135188410 | 3 | 0.423917 |
| rs622415       | MED22    | 9 | 135198014 | 2 | 7.331351 |
| rs616836       | MED22    | 9 | 135203342 | 3 | 0.225419 |
| rs616836       | MED22    | 9 | 135203342 | 5 | 0.39867  |
| rs616836       | MED22    | 9 | 135203342 | 1 | 1.664832 |
| rs616836       | MED22    | 9 | 135203342 | 7 | 0.525714 |
| rs616836       | MED22    | 9 | 135203342 | 8 | 0.018052 |
| rs553877       | MED22    | 9 | 135204776 | 3 | 0.644573 |
| rs553877       | MED22    | 9 | 135204776 | 8 | 0.421517 |
| rs553877       | MED22    | 9 | 135204776 | 5 | 1.700826 |
| rs553877       | MED22    | 9 | 135204776 | 7 | 0.470688 |
| rs553877       | MED22    | 9 | 135204776 | 1 | 5.917439 |
| SNP9-135209269 | SURF1    | 9 | 135209269 | 4 | 0.788466 |
| SNP9-135257905 | C9orf96  | 9 | 135257905 | 3 | 0.120427 |
| SNP9-135260359 | C9orf96  | 9 | 135260359 | 6 | 3.055393 |
| rs3124782      | C9orf96  | 9 | 135260817 | 7 | 0.952565 |
| rs3124782      | C9orf96  | 9 | 135260817 | 1 | 1.345572 |
| rs3124782      | C9orf96  | 9 | 135260817 | 3 | 1.516565 |
| rs3124782      | C9orf96  | 9 | 135260817 | 5 | 0.572523 |
| rs3124782      | C9orf96  | 9 | 135260817 | 2 | 1.961703 |
| rs3118667      | ADAMTS13 | 9 | 135280884 | 3 | 0.671143 |
| rs3118667      | ADAMTS13 | 9 | 135280884 | 7 | 1.317675 |
| rs3118667      | ADAMTS13 | 9 | 135280884 | 1 | 0.61812  |
| rs3118667      | ADAMTS13 | 9 | 135280884 | 2 | 3.545173 |
| rs2301612      | ADAMTS13 | 9 | 135291803 | 7 | 0.37759  |
| rs2301612      | ADAMTS13 | 9 | 135291803 | 1 | 4.180925 |
| rs2301612      | ADAMTS13 | 9 | 135291803 | 3 | 0.141668 |
| rs3124768      | ADAMTS13 | 9 | 135294318 | 7 | 0.685876 |
| rs3124768      | ADAMTS13 | 9 | 135294318 | 1 | 3.629564 |
| rs3124768      | ADAMTS13 | 9 | 135294318 | 3 | 0.390906 |
| rs2301614      | C9orf7   | 9 | 135314981 | 7 | 0.247871 |
| rs2301614      | C9orf7   | 9 | 135314981 | 3 | 0.440836 |
| rs2301614      | C9orf7   | 9 | 135314981 | 1 | 1.322302 |
| GA026127       | C9orf7   | 9 | 135318478 | 3 | 0.554907 |
| GA026127       | C9orf7   | 9 | 135318478 | 6 | 6.117198 |
| GA026127       | C9orf7   | 9 | 135318478 | 2 | 5.009055 |
| GA026127       | C9orf7   | 9 | 135318478 | 4 | 0.602826 |
| rs3094379      | C9orf7   | 9 | 135324731 | 3 | 0.216659 |



|            |              |   |           |   |          |
|------------|--------------|---|-----------|---|----------|
| rs45489391 | C9orf7       | 9 | 135325696 | 2 | 2.48132  |
| rs3094378  | SLC2A6       | 9 | 135326989 | 2 | 3.649561 |
| rs17758315 | RP13-388O5.1 | 9 | 135369711 | 3 | 0.521898 |
| rs2073874  | ADAMTSL2     | 9 | 135401991 | 7 | 0.140679 |
| rs2073874  | ADAMTSL2     | 9 | 135401991 | 8 | 0.775412 |
| GA007926   | ADAMTSL2     | 9 | 135424419 | 3 | 0.451354 |
| GA007926   | ADAMTSL2     | 9 | 135424419 | 7 | 0.530311 |
| rs1108580  | DBH          | 9 | 135494935 | 5 | 1.343687 |
| rs5320     | DBH          | 9 | 135497294 | 5 | 0.434193 |
| rs129932   | SARDH        | 9 | 135526500 | 3 | 2.321594 |
| rs129932   | SARDH        | 9 | 135526500 | 5 | 0.420446 |
| rs129932   | SARDH        | 9 | 135526500 | 2 | 1.898202 |
| rs886016   | SARDH        | 9 | 135545450 | 5 | 0.081129 |
| rs2073817  | SARDH        | 9 | 135549281 | 7 | 1.057023 |
| rs2073817  | SARDH        | 9 | 135549281 | 6 | 0.751206 |
| rs2502740  | SARDH        | 9 | 135551188 | 7 | 0.177245 |
| rs573904   | SARDH        | 9 | 135588967 | 3 | 0.908629 |
| rs509590   | VAV2         | 9 | 135618591 | 6 | 0.676933 |
| rs509590   | VAV2         | 9 | 135618591 | 8 | 0.449661 |
| rs509590   | VAV2         | 9 | 135618591 | 7 | 0.596916 |
| rs509590   | VAV2         | 9 | 135618591 | 1 | 4.355279 |
| rs602990   | VAV2         | 9 | 135633815 | 5 | 0.637761 |
| rs7865299  | VAV2         | 9 | 135652749 | 5 | 0.025176 |
| rs408307   | FLJ35348     | 9 | 135882344 | 3 | 0.866174 |
| GA026139   | WDR5         | 9 | 136013800 | 1 | 5.087874 |
| GA026139   | WDR5         | 9 | 136013800 | 7 | 4.908848 |
| GA026139   | WDR5         | 9 | 136013800 | 3 | 0.232114 |
| GA007943   | WDR5         | 9 | 136013888 | 4 | 1.305474 |
| GA007943   | WDR5         | 9 | 136013888 | 6 | 5.821666 |
| rs41310207 | COL5A1       | 9 | 136826772 | 6 | 0.010515 |
| rs41310207 | COL5A1       | 9 | 136826772 | 5 | 0.02517  |
| rs13946    | COL5A1       | 9 | 136874053 | 4 | 0.438521 |
| rs13946    | COL5A1       | 9 | 136874053 | 3 | 0.556702 |
| rs13946    | COL5A1       | 9 | 136874053 | 5 | 0.47162  |
| rs13946    | COL5A1       | 9 | 136874053 | 2 | 2.415482 |
| rs3128575  | COL5A1       | 9 | 136876471 | 7 | 0.776772 |
| rs7851696  | FCN2         | 9 | 136918912 | 5 | 1.535204 |
| rs7851696  | FCN2         | 9 | 136918912 | 2 | 2.63983  |
| rs4521835  | FCN2         | 9 | 136919127 | 7 | 0.728369 |
| rs500461   | OLFM1        | 9 | 137121948 | 4 | 4.802671 |
| rs10858334 | OLFM1        | 9 | 137129606 | 4 | 0.3765   |
| rs10858334 | OLFM1        | 9 | 137129606 | 7 | 0.647384 |
| rs10858334 | OLFM1        | 9 | 137129606 | 3 | 1.23243  |
| rs11103684 | OLFM1        | 9 | 137151891 | 6 | 0.781365 |
| rs2254812  | KIAA0649     | 9 | 137515693 | 6 | 8.683557 |
| rs2254812  | KIAA0649     | 9 | 137515693 | 4 | 6.015474 |
| rs2254812  | KIAA0649     | 9 | 137515693 | 8 | 5.179118 |

|                |          |   |           |   |          |
|----------------|----------|---|-----------|---|----------|
| rs2254812      | KIAA0649 | 9 | 137515693 | 5 | 3.341687 |
| SNP9-137579613 | OBP2A    | 9 | 137579613 | 1 | 2.577971 |
| SNP9-137579627 | OBP2A    | 9 | 137579627 | 5 | 4.008623 |
| SNP9-137579627 | OBP2A    | 9 | 137579627 | 4 | 1.583002 |
| SNP9-137579627 | OBP2A    | 9 | 137579627 | 7 | 4.729664 |
| rs3178137      | OBP2A    | 9 | 137580383 | 8 | 1.086697 |
| rs3178137      | OBP2A    | 9 | 137580383 | 7 | 0.072962 |
| rs3178137      | OBP2A    | 9 | 137580383 | 5 | 2.218447 |
| rs3178137      | OBP2A    | 9 | 137580383 | 4 | 1.756827 |
| rs3178137      | OBP2A    | 9 | 137580383 | 2 | 1.400101 |
| rs2853652      | OBP2A    | 9 | 137580462 | 7 | 4.005971 |
| rs2853652      | OBP2A    | 9 | 137580462 | 1 | 3.815152 |
| rs2853652      | OBP2A    | 9 | 137580462 | 8 | 3.807746 |
| rs45618736     | OBP2A    | 9 | 137580983 | 3 | 0.24721  |
| SNP9-137581581 | OBP2A    | 9 | 137581581 | 5 | 3.4948   |
| SNP9-137581581 | OBP2A    | 9 | 137581581 | 7 | 4.419397 |
| rs17040344     | GLT6D1   | 9 | 137655940 | 8 | 1.312617 |
| rs914428       | KCNT1    | 9 | 137809082 | 1 | 3.461273 |
| rs914428       | KCNT1    | 9 | 137809082 | 3 | 1.599844 |
| rs2280486      | BTBD14A  | 9 | 138044957 | 5 | 0.732964 |
| rs2280486      | BTBD14A  | 9 | 138044957 | 1 | 3.94531  |
| rs2280486      | BTBD14A  | 9 | 138044957 | 6 | 0.515081 |
| rs2280486      | BTBD14A  | 9 | 138044957 | 8 | 0.319938 |
| rs2280486      | BTBD14A  | 9 | 138044957 | 3 | 0.056556 |
| rs2275107      | BTBD14A  | 9 | 138048071 | 8 | 5.865259 |
| rs2275107      | BTBD14A  | 9 | 138048071 | 7 | 0.145203 |
| SNP9-138258494 | QSOX2    | 9 | 138258494 | 6 | 0.303874 |
| SNP9-138258494 | QSOX2    | 9 | 138258494 | 7 | 0.417993 |
| SNP9-138258494 | QSOX2    | 9 | 138258494 | 3 | 1.142247 |
| SNP9-138355236 | GPSM1    | 9 | 138355236 | 8 | 0.359815 |
| SNP9-138355236 | GPSM1    | 9 | 138355236 | 4 | 0.664366 |
| SNP9-138355236 | GPSM1    | 9 | 138355236 | 5 | 0.090621 |
| SNP9-138355236 | GPSM1    | 9 | 138355236 | 1 | 0.65497  |
| SNP9-138355236 | GPSM1    | 9 | 138355236 | 3 | 1.242132 |
| SNP9-138355236 | GPSM1    | 9 | 138355236 | 2 | 0.807606 |
| rs3812547      | GPSM1    | 9 | 138372316 | 5 | 2.985379 |
| rs3812547      | GPSM1    | 9 | 138372316 | 6 | 3.579974 |
| rs3812547      | GPSM1    | 9 | 138372316 | 3 | 0.860042 |
| rs3812547      | GPSM1    | 9 | 138372316 | 4 | 2.484677 |
| rs3812547      | GPSM1    | 9 | 138372316 | 2 | 2.042208 |
| rs3812552      | DNLZ     | 9 | 138376289 | 7 | 0.497997 |
| rs3812552      | DNLZ     | 9 | 138376289 | 6 | 0.485627 |
| rs3812552      | DNLZ     | 9 | 138376289 | 5 | 0.176934 |
| rs10781499     | CARD9    | 9 | 138386226 | 8 | 0.037987 |
| rs10781499     | CARD9    | 9 | 138386226 | 4 | 6.072834 |
| rs10781499     | CARD9    | 9 | 138386226 | 2 | 4.119631 |
| rs10781499     | CARD9    | 9 | 138386226 | 3 | 1.087054 |

|                |          |   |           |   |          |
|----------------|----------|---|-----------|---|----------|
| rs10781499     | CARD9    | 9 | 138386226 | 6 | 0.72666  |
| rs10781499     | CARD9    | 9 | 138386226 | 7 | 0.690184 |
| rs4077515      | CARD9    | 9 | 138386317 | 3 | 0.551669 |
| rs4077515      | CARD9    | 9 | 138386317 | 2 | 3.809314 |
| rs4077515      | CARD9    | 9 | 138386317 | 4 | 0.226373 |
| rs4077515      | CARD9    | 9 | 138386317 | 8 | 0.103676 |
| rs4077515      | CARD9    | 9 | 138386317 | 7 | 0.605159 |
| rs4077515      | CARD9    | 9 | 138386317 | 6 | 1.235916 |
| rs3812570      | SNAPC4   | 9 | 138395025 | 7 | 0.304238 |
| rs3812570      | SNAPC4   | 9 | 138395025 | 3 | 0.698836 |
| rs10781510     | SNAPC4   | 9 | 138398994 | 4 | 0.364969 |
| rs10781510     | SNAPC4   | 9 | 138398994 | 6 | 3.710604 |
| rs10781510     | SNAPC4   | 9 | 138398994 | 8 | 4.226657 |
| rs10781510     | SNAPC4   | 9 | 138398994 | 3 | 0.536143 |
| rs10781510     | SNAPC4   | 9 | 138398994 | 7 | 0.131635 |
| SNP9-138418401 | SDCCAG3  | 9 | 138418401 | 7 | 0.937054 |
| SNP9-138418401 | SDCCAG3  | 9 | 138418401 | 5 | 7.755934 |
| SNP9-138418401 | SDCCAG3  | 9 | 138418401 | 6 | 1.147779 |
| rs4418446      | SDCCAG3  | 9 | 138424845 | 3 | 0.109334 |
| rs4418446      | SDCCAG3  | 9 | 138424845 | 4 | 0.214138 |
| rs4418446      | SDCCAG3  | 9 | 138424845 | 5 | 1.05127  |
| rs10870144     | PMPCA    | 9 | 138426288 | 7 | 0.686308 |
| rs10870144     | PMPCA    | 9 | 138426288 | 5 | 0.962905 |
| rs10870144     | PMPCA    | 9 | 138426288 | 6 | 0.597455 |
| rs33982662     | INPP5E   | 9 | 138444558 | 8 | 0.563196 |
| rs33982662     | INPP5E   | 9 | 138444558 | 3 | 0.54156  |
| rs33982662     | INPP5E   | 9 | 138444558 | 4 | 0.048064 |
| rs10870194     | INPP5E   | 9 | 138446855 | 2 | 0.566728 |
| rs10870194     | INPP5E   | 9 | 138446855 | 3 | 0.181744 |
| rs10870194     | INPP5E   | 9 | 138446855 | 4 | 0.630667 |
| rs10870194     | INPP5E   | 9 | 138446855 | 7 | 0.603893 |
| SNP9-138491383 | SEC16A   | 9 | 138491383 | 7 | 0.04294  |
| SNP9-138491383 | SEC16A   | 9 | 138491383 | 6 | 7.022561 |
| rs1139057      | C9orf163 | 9 | 138500141 | 6 | 0.508034 |
| rs1139057      | C9orf163 | 9 | 138500141 | 8 | 0.62553  |
| rs1139057      | C9orf163 | 9 | 138500141 | 1 | 4.604046 |
| rs1139057      | C9orf163 | 9 | 138500141 | 4 | 0.541307 |
| rs1139057      | C9orf163 | 9 | 138500141 | 7 | 0.952556 |
| rs45494498     | EGFL7    | 9 | 138686942 | 4 | 0.132412 |
| SNP9-138736563 | FAM69B   | 9 | 138736563 | 7 | 0.222406 |
| rs7038042      | FAM69B   | 9 | 138737447 | 8 | 0.82757  |
| rs7038042      | FAM69B   | 9 | 138737447 | 5 | 3.645705 |
| rs7038042      | FAM69B   | 9 | 138737447 | 6 | 4.337083 |
| rs6874         | FAM69B   | 9 | 138737657 | 3 | 0.399059 |
| rs6873         | FAM69B   | 9 | 138738104 | 6 | 1.452838 |
| rs6873         | FAM69B   | 9 | 138738104 | 8 | 1.869521 |
| rs6873         | FAM69B   | 9 | 138738104 | 3 | 0.2907   |

|                |          |   |           |   |          |
|----------------|----------|---|-----------|---|----------|
| rs6873         | FAM69B   | 9 | 138738104 | 5 | 1.787769 |
| rs2282258      | LCN8     | 9 | 138769433 | 7 | 1.327856 |
| rs945386       | KIAA1984 | 9 | 138813417 | 2 | 1.061043 |
| rs945386       | KIAA1984 | 9 | 138813417 | 4 | 0.427707 |
| rs945386       | KIAA1984 | 9 | 138813417 | 7 | 0.375774 |
| rs945386       | KIAA1984 | 9 | 138813417 | 6 | 2.414959 |
| rs7859194      | KIAA1984 | 9 | 138814390 | 6 | 0.524354 |
| rs7859194      | KIAA1984 | 9 | 138814390 | 4 | 0.14012  |
| rs7859194      | KIAA1984 | 9 | 138814390 | 7 | 0.297514 |
| rs7859194      | KIAA1984 | 9 | 138814390 | 2 | 4.191488 |
| rs2811795      | KIAA1984 | 9 | 138820426 | 6 | 0.04046  |
| rs2811795      | KIAA1984 | 9 | 138820426 | 7 | 1.039764 |
| rs2254143      | KIAA1984 | 9 | 138820929 | 6 | 2.025561 |
| rs2254143      | KIAA1984 | 9 | 138820929 | 7 | 0.6402   |
| rs2811748      | C9orf86  | 9 | 138846060 | 2 | 6.361213 |
| rs2811748      | C9orf86  | 9 | 138846060 | 5 | 2.898711 |
| rs2811748      | C9orf86  | 9 | 138846060 | 3 | 2.64417  |
| rs2811748      | C9orf86  | 9 | 138846060 | 6 | 6.082608 |
| rs2811748      | C9orf86  | 9 | 138846060 | 1 | 2.455896 |
| rs45449193     | MAMDC4   | 9 | 138868304 | 5 | 0.750452 |
| rs45449193     | MAMDC4   | 9 | 138868304 | 8 | 0.042456 |
| SNP9-138960381 | C8G      | 9 | 138960381 | 7 | 1.298679 |
| SNP9-138960381 | C8G      | 9 | 138960381 | 8 | 3.682156 |
| SNP9-138960381 | C8G      | 9 | 138960381 | 1 | 0.625239 |
| SNP9-138960381 | C8G      | 9 | 138960381 | 5 | 1.368504 |
| SNP9-138960381 | C8G      | 9 | 138960381 | 2 | 0.73841  |
| rs6926         | PTGDS    | 9 | 138995962 | 4 | 0.801078 |
| rs6926         | PTGDS    | 9 | 138995962 | 5 | 0.021855 |
| rs2049043      | FLJ45224 | 9 | 138996950 | 5 | 3.922467 |
| rs2049043      | FLJ45224 | 9 | 138996950 | 6 | 3.644372 |
| rs2049043      | FLJ45224 | 9 | 138996950 | 8 | 0.072569 |
| rs2049043      | FLJ45224 | 9 | 138996950 | 4 | 2.847213 |
| rs7029565      | FLJ45224 | 9 | 138998138 | 5 | 0.446123 |
| rs2292925      | ENTPD2   | 9 | 139065184 | 5 | 0.657576 |
| rs2292925      | ENTPD2   | 9 | 139065184 | 8 | 0.887676 |
| rs2292925      | ENTPD2   | 9 | 139065184 | 6 | 1.117645 |
| rs3750517      | C9orf140 | 9 | 139078117 | 6 | 0.05362  |
| rs3750517      | C9orf140 | 9 | 139078117 | 5 | 0.921997 |
| rs3750517      | C9orf140 | 9 | 139078117 | 8 | 0.686192 |
| rs867476       | C9orf140 | 9 | 139078404 | 6 | 0.156106 |
| rs867476       | C9orf140 | 9 | 139078404 | 1 | 0.912502 |
| rs867476       | C9orf140 | 9 | 139078404 | 2 | 4.296648 |
| GA008048       | UAP1L1   | 9 | 139095016 | 1 | 5.716063 |
| rs6293         | GRIN1    | 9 | 139171059 | 3 | 0.755291 |
| rs11549105     | ANAPC2   | 9 | 139197460 | 3 | 1.222028 |
| rs11549105     | ANAPC2   | 9 | 139197460 | 1 | 4.699523 |
| rs11556580     | SSNA1    | 9 | 139204197 | 1 | 4.208374 |

|                |               |    |           |   |          |
|----------------|---------------|----|-----------|---|----------|
| rs11556580     | SSNA1         | 9  | 139204197 | 3 | 0.089033 |
| rs11526461     | NDOR1         | 9  | 139231092 | 2 | 4.340072 |
| rs28407527     | SLC34A3       | 9  | 139247906 | 1 | 0.172466 |
| rs28407527     | SLC34A3       | 9  | 139247906 | 8 | 1.5557   |
| rs28407527     | SLC34A3       | 9  | 139247906 | 5 | 0.561169 |
| rs28407527     | SLC34A3       | 9  | 139247906 | 4 | 0.508954 |
| rs4073074      | LOC401565     | 9  | 139259005 | 2 | 2.242397 |
| rs28740782     | RP13-122B23.3 | 9  | 139287806 | 7 | 7.239234 |
| rs28740782     | RP13-122B23.3 | 9  | 139287806 | 4 | 1.038819 |
| rs28740782     | RP13-122B23.3 | 9  | 139287806 | 2 | 2.878873 |
| rs28740782     | RP13-122B23.3 | 9  | 139287806 | 5 | 0.136854 |
| rs28740782     | RP13-122B23.3 | 9  | 139287806 | 3 | 0.162007 |
| rs13301565     | C9orf167      | 9  | 139296861 | 1 | 4.315201 |
| rs13301565     | C9orf167      | 9  | 139296861 | 7 | 0.158478 |
| SNP9-139363665 | FLJ20433      | 9  | 139363665 | 1 | 0.47519  |
| SNP9-139363665 | FLJ20433      | 9  | 139363665 | 3 | 0.753808 |
| SNP9-139366964 | FLJ20433      | 9  | 139366964 | 7 | 0.897062 |
| SNP9-139366964 | FLJ20433      | 9  | 139366964 | 2 | 1.53683  |
| SNP9-139366964 | FLJ20433      | 9  | 139366964 | 1 | 0.861049 |
| rs7389423      | FLJ20433      | 9  | 139370639 | 7 | 0.266728 |
| rs7389423      | FLJ20433      | 9  | 139370639 | 1 | 0.474401 |
| rs13291830     | FLJ20433      | 9  | 139397647 | 5 | 1.724753 |
| rs34155071     | NOXA1         | 9  | 139447484 | 5 | 1.928356 |
| rs13297080     | ENTPD8        | 9  | 139450797 | 4 | 3.919765 |
| rs6606582      | ENTPD8        | 9  | 139452299 | 4 | 0.599734 |
| rs4962237      | PNPLA7        | 9  | 139478402 | 3 | 0.48808  |
| rs11137410     | PNPLA7        | 9  | 139534231 | 3 | 0.904038 |
| rs1045777      | C9orf37       | 9  | 139632376 | 6 | 5.457963 |
| rs1045777      | C9orf37       | 9  | 139632376 | 3 | 0.280796 |
| rs1045777      | C9orf37       | 9  | 139632376 | 1 | 5.742015 |
| rs1129767      | EHMT1         | 9  | 139758237 | 5 | 5.308984 |
| rs1129767      | EHMT1         | 9  | 139758237 | 2 | 2.699837 |
| rs45450992     | EHMT1         | 9  | 139768563 | 4 | 0.651272 |
| SNP9-140037600 | CACNA1B       | 9  | 140037600 | 3 | 0.501379 |
| SNP9-140037600 | CACNA1B       | 9  | 140037600 | 1 | 0.254224 |
| SNP9-140037600 | CACNA1B       | 9  | 140037600 | 5 | 0.139054 |
| rs2229948      | CACNA1B       | 9  | 140128697 | 7 | 3.077065 |
| rs2229949      | CACNA1B       | 9  | 140136352 | 3 | 0.119157 |
| rs1017361      | ZMYND11       | 10 | 284953    | 4 | 0.661269 |
| rs10904083     | DIP2C         | 10 | 419977    | 5 | 0.044105 |
| rs10904083     | DIP2C         | 10 | 419977    | 1 | 4.405673 |
| rs12772979     | GTPBP4        | 10 | 1024412   | 6 | 1.745727 |
| rs13377037     | IDI2          | 10 | 1058639   | 3 | 1.518255 |
| rs13377037     | IDI2          | 10 | 1058639   | 1 | 0.636288 |
| rs11250238     | C10orf110     | 10 | 1079616   | 1 | 6.177379 |
| rs11250238     | C10orf110     | 10 | 1079616   | 7 | 2.749445 |
| rs11818314     | LOC727843     | 10 | 1138157   | 3 | 0.324457 |

|               |           |    |         |   |          |
|---------------|-----------|----|---------|---|----------|
| rs11818314    | LOC727843 | 10 | 1138157 | 1 | 3.010669 |
| rs12570526    | C10orf139 | 10 | 1195850 | 1 | 1.995803 |
| rs12570526    | C10orf139 | 10 | 1195850 | 2 | 1.860682 |
| rs1046914     | ADARB2    | 10 | 1218206 | 4 | 4.025776 |
| rs904957      | ADARB2    | 10 | 1218296 | 4 | 3.364728 |
| rs3750679     | ADARB2    | 10 | 1218623 | 4 | 2.136758 |
| rs11250317    | ADARB2    | 10 | 1218905 | 3 | 1.159034 |
| rs904960      | ADARB2    | 10 | 1219009 | 4 | 0.63402  |
| rs2271275     | ADARB2    | 10 | 1220968 | 4 | 2.666729 |
| rs12411758    | LOC728209 | 10 | 2254135 | 7 | 3.266514 |
| rs11542777    | PFKP      | 10 | 3133667 | 3 | 0.050949 |
| rs11251721    | PFKP      | 10 | 3140898 | 5 | 0.294191 |
| rs11251721    | PFKP      | 10 | 3140898 | 8 | 2.594927 |
| rs1132173     | PFKP      | 10 | 3140973 | 6 | 0.015786 |
| rs1132173     | PFKP      | 10 | 3140973 | 7 | 0.87656  |
| rs1132173     | PFKP      | 10 | 3140973 | 5 | 0.479    |
| rs1132173     | PFKP      | 10 | 3140973 | 2 | 1.974654 |
| rs2306302     | PFKP      | 10 | 3144461 | 1 | 1.905444 |
| rs1052929     | PFKP      | 10 | 3168814 | 1 | 0.905595 |
| rs1052929     | PFKP      | 10 | 3168814 | 2 | 8.686784 |
| rs1052929     | PFKP      | 10 | 3168814 | 8 | 6.14182  |
| rs7673        | PFKP      | 10 | 3168905 | 2 | 6.223527 |
| rs7673        | PFKP      | 10 | 3168905 | 4 | 5.130594 |
| rs9129        | PITRM1    | 10 | 3169968 | 2 | 7.511189 |
| rs9129        | PITRM1    | 10 | 3169968 | 1 | 0.372872 |
| rs9129        | PITRM1    | 10 | 3169968 | 8 | 7.160145 |
| rs6901        | PITRM1    | 10 | 3170227 | 2 | 2.929963 |
| rs6901        | PITRM1    | 10 | 3170227 | 7 | 6.788783 |
| rs35779348    | PITRM1    | 10 | 3170288 | 3 | 0.121844 |
| rs10175       | PITRM1    | 10 | 3170298 | 7 | 2.825575 |
| rs10175       | PITRM1    | 10 | 3170298 | 6 | 4.039044 |
| rs10175       | PITRM1    | 10 | 3170298 | 4 | 3.130985 |
| rs2388556     | PITRM1    | 10 | 3181823 | 2 | 1.461651 |
| rs2388556     | PITRM1    | 10 | 3181823 | 1 | 1.551444 |
| rs4242746     | PITRM1    | 10 | 3192065 | 7 | 0.87325  |
| rs9423502     | PITRM1    | 10 | 3197705 | 6 | 0.591593 |
| rs1127047     | PITRM1    | 10 | 3198512 | 6 | 6.850431 |
| rs12249207    | LOC338588 | 10 | 4688360 | 7 | 0.011165 |
| rs12249207    | LOC338588 | 10 | 4688360 | 8 | 0.583514 |
| rs12249207    | LOC338588 | 10 | 4688360 | 5 | 0.012058 |
| SNP10-4869748 | AKR1CL2   | 10 | 4869748 | 5 | 5.797677 |
| rs12573669    | AKR1CL2   | 10 | 4874642 | 6 | 0.486565 |
| rs17133779    | AKR1CL2   | 10 | 4879974 | 6 | 3.178512 |
| rs7092190     | tAKR      | 10 | 4908182 | 1 | 6.240312 |
| rs7092190     | tAKR      | 10 | 4908182 | 5 | 1.579926 |
| rs10904368    | tAKR      | 10 | 4922085 | 5 | 2.01441  |
| rs10904368    | tAKR      | 10 | 4922085 | 1 | 5.496139 |

|               |          |    |         |   |          |
|---------------|----------|----|---------|---|----------|
| rs12529       | AKR1C3   | 10 | 5126651 | 5 | 9.503338 |
| rs12529       | AKR1C3   | 10 | 5126651 | 4 | 0.368048 |
| rs12529       | AKR1C3   | 10 | 5126651 | 6 | 6.556791 |
| rs7741        | AKR1C3   | 10 | 5128607 | 3 | 0.592864 |
| rs7741        | AKR1C3   | 10 | 5128607 | 6 | 0.805977 |
| rs7741        | AKR1C3   | 10 | 5128607 | 7 | 0.786457 |
| rs7741        | AKR1C3   | 10 | 5128607 | 8 | 0.545393 |
| rs2210680     | AKR1CL1  | 10 | 5186993 | 1 | 1.694822 |
| rs1781931     | AKR1CL1  | 10 | 5187881 | 5 | 2.469525 |
| rs11253021    | AKR1CL1  | 10 | 5193864 | 3 | 0.341196 |
| rs17134592    | AKR1C4   | 10 | 5250682 | 3 | 0.017033 |
| rs17134592    | AKR1C4   | 10 | 5250682 | 4 | 0.369768 |
| rs17307359    | AKR1C4   | 10 | 5250859 | 4 | 0.007412 |
| rs3255        | TUBAL3   | 10 | 5425181 | 3 | 0.187334 |
| rs3255        | TUBAL3   | 10 | 5425181 | 6 | 3.32221  |
| rs3255        | TUBAL3   | 10 | 5425181 | 2 | 4.299958 |
| rs3255        | TUBAL3   | 10 | 5425181 | 8 | 0.185704 |
| rs7097775     | TUBAL3   | 10 | 5425918 | 2 | 5.861044 |
| rs7097775     | TUBAL3   | 10 | 5425918 | 4 | 2.118923 |
| rs7097775     | TUBAL3   | 10 | 5425918 | 8 | 0.886366 |
| rs7097775     | TUBAL3   | 10 | 5425918 | 1 | 1.659163 |
| rs7097775     | TUBAL3   | 10 | 5425918 | 3 | 0.423036 |
| rs7477466     | TUBAL3   | 10 | 5436794 | 1 | 0.587939 |
| rs7477466     | TUBAL3   | 10 | 5436794 | 3 | 0.399215 |
| rs7477466     | TUBAL3   | 10 | 5436794 | 6 | 1.227426 |
| rs7477466     | TUBAL3   | 10 | 5436794 | 8 | 0.512111 |
| rs10904517    | CALML5   | 10 | 5531183 | 2 | 0.888222 |
| rs10904517    | CALML5   | 10 | 5531183 | 8 | 6.488138 |
| rs10904517    | CALML5   | 10 | 5531183 | 1 | 0.467462 |
| rs10904517    | CALML5   | 10 | 5531183 | 3 | 0.133474 |
| rs2797486     | C10orf18 | 10 | 5821975 | 3 | 0.059969 |
| rs2797486     | C10orf18 | 10 | 5821975 | 4 | 5.208173 |
| rs2797486     | C10orf18 | 10 | 5821975 | 6 | 0.817551 |
| rs2797486     | C10orf18 | 10 | 5821975 | 7 | 7.084282 |
| SNP10-5824157 | C10orf18 | 10 | 5824157 | 5 | 0.758762 |
| SNP10-5824157 | C10orf18 | 10 | 5824157 | 4 | 7.014564 |
| SNP10-5824157 | C10orf18 | 10 | 5824157 | 8 | 7.389222 |
| SNP10-5843374 | C10orf18 | 10 | 5843374 | 7 | 0.397582 |
| rs1046393     | C10orf18 | 10 | 5845850 | 4 | 6.7422   |
| rs1046393     | C10orf18 | 10 | 5845850 | 5 | 5.70491  |
| rs11255072    | C10orf18 | 10 | 5846254 | 2 | 4.511948 |
| rs1057943     | C10orf18 | 10 | 5846260 | 6 | 0.366826 |
| rs1057943     | C10orf18 | 10 | 5846260 | 3 | 0.743643 |
| rs2296139     | IL15RA   | 10 | 6048178 | 8 | 3.595693 |
| rs3829148     | PFKFB3   | 10 | 6315790 | 2 | 2.137277 |
| rs3829148     | PFKFB3   | 10 | 6315790 | 4 | 0.934663 |
| rs3829148     | PFKFB3   | 10 | 6315790 | 5 | 0.610463 |

|            |          |    |          |   |          |
|------------|----------|----|----------|---|----------|
| rs3829148  | PFKFB3   | 10 | 6315790  | 6 | 0.594526 |
| rs3829148  | PFKFB3   | 10 | 6315790  | 1 | 0.651714 |
| rs582052   | PRKCQ    | 10 | 6509161  | 7 | 0.563421 |
| rs582052   | PRKCQ    | 10 | 6509161  | 3 | 0.118347 |
| rs2453     | PRKCQ    | 10 | 6509679  | 3 | 0.035049 |
| rs2453     | PRKCQ    | 10 | 6509679  | 8 | 0.079427 |
| rs2453     | PRKCQ    | 10 | 6509679  | 2 | 5.176111 |
| rs11258747 | PRKCQ    | 10 | 6512897  | 7 | 0.423687 |
| rs11258747 | PRKCQ    | 10 | 6512897  | 2 | 4.006057 |
| rs2248474  | SFMBT2   | 10 | 7325638  | 5 | 0.941447 |
| rs2248474  | SFMBT2   | 10 | 7325638  | 7 | 1.360052 |
| rs2248474  | SFMBT2   | 10 | 7325638  | 6 | 2.18484  |
| rs1244229  | TAF3     | 10 | 8047566  | 5 | 7.008794 |
| rs1244229  | TAF3     | 10 | 8047566  | 8 | 1.754742 |
| rs1244185  | FLJ45983 | 10 | 8132580  | 4 | 2.116922 |
| rs1244185  | FLJ45983 | 10 | 8132580  | 5 | 0.344218 |
| rs1244185  | FLJ45983 | 10 | 8132580  | 3 | 0.568228 |
| rs1244185  | FLJ45983 | 10 | 8132580  | 6 | 4.071643 |
| rs501764   | FLJ45983 | 10 | 8133040  | 4 | 0.03947  |
| rs501764   | FLJ45983 | 10 | 8133040  | 3 | 0.911318 |
| rs501764   | FLJ45983 | 10 | 8133040  | 5 | 1.353442 |
| rs485411   | FLJ45983 | 10 | 8133191  | 5 | 0.05444  |
| rs485411   | FLJ45983 | 10 | 8133191  | 6 | 0.356856 |
| rs485411   | FLJ45983 | 10 | 8133191  | 3 | 0.4467   |
| rs485411   | FLJ45983 | 10 | 8133191  | 4 | 0.606702 |
| rs2275806  | FLJ45983 | 10 | 8135346  | 6 | 0.372463 |
| rs2275806  | FLJ45983 | 10 | 8135346  | 8 | 0.32571  |
| rs2275806  | FLJ45983 | 10 | 8135346  | 4 | 0.330434 |
| rs2275806  | FLJ45983 | 10 | 8135346  | 5 | 0.368735 |
| rs2275806  | FLJ45983 | 10 | 8135346  | 3 | 0.54033  |
| rs2279809  | C10orf31 | 10 | 11400679 | 8 | 0.146501 |
| rs2279809  | C10orf31 | 10 | 11400679 | 1 | 0.487354 |
| rs2279809  | C10orf31 | 10 | 11400679 | 2 | 2.224869 |
| rs2279809  | C10orf31 | 10 | 11400679 | 6 | 1.642789 |
| rs1051765  | CUGBP2   | 10 | 11417005 | 6 | 3.960489 |
| rs1051765  | CUGBP2   | 10 | 11417005 | 5 | 0.314546 |
| rs1051765  | CUGBP2   | 10 | 11417005 | 7 | 5.932539 |
| rs2062988  | DHTKD1   | 10 | 12183111 | 3 | 0.110907 |
| rs2062988  | DHTKD1   | 10 | 12183111 | 5 | 6.917859 |
| rs2062988  | DHTKD1   | 10 | 12183111 | 6 | 0.74916  |
| rs10466280 | SEC61A2  | 10 | 12231939 | 4 | 0.625223 |
| rs10466280 | SEC61A2  | 10 | 12231939 | 1 | 0.685634 |
| rs10466280 | SEC61A2  | 10 | 12231939 | 8 | 4.07831  |
| rs3232     | CCDC3    | 10 | 12978760 | 5 | 0.381335 |
| rs3232     | CCDC3    | 10 | 12978760 | 6 | 0.532452 |
| rs3232     | CCDC3    | 10 | 12978760 | 4 | 0.325824 |
| rs2280076  | CCDC3    | 10 | 12978967 | 8 | 0.387844 |



|                |           |    |          |   |          |
|----------------|-----------|----|----------|---|----------|
| rs2280076      | CCDC3     | 10 | 12978967 | 4 | 0.169052 |
| rs10752280     | CCDC3     | 10 | 12980383 | 1 | 1.491019 |
| rs34630110     | MCM10     | 10 | 13254759 | 1 | 0.86876  |
| rs34630110     | MCM10     | 10 | 13254759 | 2 | 2.723591 |
| rs7905784      | MCM10     | 10 | 13274362 | 1 | 0.259558 |
| rs7905784      | MCM10     | 10 | 13274362 | 2 | 1.1738   |
| SNP10-13380242 | PHYH      | 10 | 13380242 | 6 | 6.621987 |
| SNP10-13380242 | PHYH      | 10 | 13380242 | 3 | 0.624989 |
| SNP10-13380242 | PHYH      | 10 | 13380242 | 4 | 0.913502 |
| rs4750356      | C10orf30  | 10 | 13520795 | 4 | 2.036216 |
| rs4750356      | C10orf30  | 10 | 13520795 | 1 | 1.779544 |
| rs4750356      | C10orf30  | 10 | 13520795 | 2 | 0.757794 |
| rs3814659      | C10orf30  | 10 | 13584870 | 5 | 0.527591 |
| rs3814659      | C10orf30  | 10 | 13584870 | 1 | 4.066965 |
| rs3814659      | C10orf30  | 10 | 13584870 | 7 | 0.212566 |
| rs9473         | FRMD4A    | 10 | 13727177 | 5 | 0.908075 |
| rs9473         | FRMD4A    | 10 | 13727177 | 7 | 0.573721 |
| rs9473         | FRMD4A    | 10 | 13727177 | 4 | 0.057758 |
| rs9473         | FRMD4A    | 10 | 13727177 | 1 | 0.5691   |
| rs9473         | FRMD4A    | 10 | 13727177 | 2 | 1.12494  |
| rs3780915      | FAM107B   | 10 | 14603103 | 5 | 1.692044 |
| rs3780915      | FAM107B   | 10 | 14603103 | 3 | 0.103047 |
| rs2278871      | ARMTL1    | 10 | 14901407 | 5 | 0.298254 |
| rs17353856     | SUV39H2   | 10 | 14981660 | 3 | 0.654833 |
| rs4750568      | MEIG1     | 10 | 15048499 | 5 | 2.53749  |
| rs4750568      | MEIG1     | 10 | 15048499 | 7 | 2.633825 |
| rs4750568      | MEIG1     | 10 | 15048499 | 4 | 2.002904 |
| rs4418687      | MEIG1     | 10 | 15054704 | 5 | 0.097227 |
| rs4418687      | MEIG1     | 10 | 15054704 | 7 | 0.528821 |
| rs4418687      | MEIG1     | 10 | 15054704 | 4 | 0.705663 |
| rs5019235      | MEIG1     | 10 | 15054850 | 4 | 0.504249 |
| rs5019235      | MEIG1     | 10 | 15054850 | 5 | 1.00277  |
| rs4750593      | ACBD7     | 10 | 15157547 | 5 | 0.521277 |
| rs4750593      | ACBD7     | 10 | 15157547 | 1 | 5.141597 |
| rs4750593      | ACBD7     | 10 | 15157547 | 3 | 0.062707 |
| rs6602811      | C10orf111 | 10 | 15177912 | 6 | 0.055788 |
| rs7896053      | C10orf111 | 10 | 15178621 | 5 | 1.434447 |
| rs7896053      | C10orf111 | 10 | 15178621 | 7 | 1.89064  |
| rs15772        | RPP38     | 10 | 15185861 | 7 | 6.865941 |
| rs15772        | RPP38     | 10 | 15185861 | 6 | 5.775016 |
| rs15772        | RPP38     | 10 | 15185861 | 8 | 4.775252 |
| rs7922050      | PTER      | 10 | 16519013 | 4 | 0.989059 |
| rs7922050      | PTER      | 10 | 16519013 | 5 | 1.120977 |
| rs7922050      | PTER      | 10 | 16519013 | 3 | 0.851216 |
| rs7922050      | PTER      | 10 | 16519013 | 1 | 3.695155 |
| rs7922050      | PTER      | 10 | 16519013 | 7 | 0.231338 |
| rs3087659      | PTER      | 10 | 16594729 | 4 | 0.667747 |

|                |           |    |          |   |          |
|----------------|-----------|----|----------|---|----------|
| rs3087659      | PTER      | 10 | 16594729 | 3 | 1.047959 |
| rs3087659      | PTER      | 10 | 16594729 | 8 | 0.763356 |
| rs3087659      | PTER      | 10 | 16594729 | 5 | 0.557285 |
| rs1055340      | PTER      | 10 | 16595534 | 3 | 1.310793 |
| rs1055340      | PTER      | 10 | 16595534 | 5 | 2.312475 |
| rs1055340      | PTER      | 10 | 16595534 | 4 | 2.926813 |
| rs1055340      | PTER      | 10 | 16595534 | 8 | 2.29222  |
| rs1801232      | CUBN      | 10 | 16910918 | 4 | 0.350749 |
| SNP10-16959003 | CUBN      | 10 | 16959003 | 5 | 0.314227 |
| SNP10-16959003 | CUBN      | 10 | 16959003 | 8 | 4.732297 |
| rs1801231      | CUBN      | 10 | 17064509 | 7 | 0.572327 |
| rs1801231      | CUBN      | 10 | 17064509 | 4 | 0.991663 |
| rs1873469      | CUBN      | 10 | 17127162 | 5 | 0.781407 |
| rs1801225      | CUBN      | 10 | 17153569 | 5 | 0.222256 |
| rs1801225      | CUBN      | 10 | 17153569 | 4 | 0.358288 |
| rs1801225      | CUBN      | 10 | 17153569 | 8 | 3.918638 |
| rs1801225      | CUBN      | 10 | 17153569 | 1 | 1.078763 |
| rs7905349      | CUBN      | 10 | 17166389 | 5 | 5.319118 |
| rs1801222      | CUBN      | 10 | 17196157 | 1 | 5.268238 |
| rs1801222      | CUBN      | 10 | 17196157 | 5 | 4.892531 |
| rs1801222      | CUBN      | 10 | 17196157 | 7 | 1.586692 |
| rs11254401     | TRDMT1    | 10 | 17228824 | 1 | 6.228011 |
| rs11254401     | TRDMT1    | 10 | 17228824 | 7 | 0.263036 |
| rs11254408     | TRDMT1    | 10 | 17239784 | 1 | 4.702236 |
| rs11254408     | TRDMT1    | 10 | 17239784 | 7 | 2.471765 |
| rs11254413     | TRDMT1    | 10 | 17244193 | 5 | 0.067683 |
| rs11254413     | TRDMT1    | 10 | 17244193 | 2 | 6.409945 |
| rs7096233      | TRDMT1    | 10 | 17250887 | 1 | 4.103822 |
| rs7096233      | TRDMT1    | 10 | 17250887 | 7 | 0.124501 |
| rs1061162      | STAM      | 10 | 17797302 | 1 | 5.04356  |
| rs2461153      | FAM23B    | 10 | 18129628 | 3 | 0.029823 |
| rs11012350     | SLC39A12  | 10 | 18371998 | 5 | 1.97749  |
| rs2228645      | CACNB2    | 10 | 18868377 | 7 | 0.009603 |
| SNP10-18868641 | CACNB2    | 10 | 18868641 | 2 | 4.66233  |
| rs12359433     | ARL5B     | 10 | 19004103 | 6 | 6.988505 |
| rs11593491     | LOC645120 | 10 | 19065203 | 5 | 0.144027 |
| rs11593491     | LOC645120 | 10 | 19065203 | 3 | 1.61659  |
| rs7096907      | LOC645120 | 10 | 19066847 | 6 | 1.555378 |
| rs7096907      | LOC645120 | 10 | 19066847 | 1 | 1.304937 |
| rs12771333     | C10orf112 | 10 | 19716567 | 5 | 2.278765 |
| rs12771333     | C10orf112 | 10 | 19716567 | 1 | 1.446326 |
| rs2151234      | C10orf112 | 10 | 19818062 | 1 | 0.235789 |
| rs2151234      | C10orf112 | 10 | 19818062 | 5 | 0.192829 |
| rs2151234      | C10orf112 | 10 | 19818062 | 2 | 0.913033 |
| rs2151234      | C10orf112 | 10 | 19818062 | 3 | 0.127847 |
| rs2151234      | C10orf112 | 10 | 19818062 | 7 | 1.0242   |
| rs16918863     | C10orf112 | 10 | 19820469 | 1 | 3.210076 |

|            |           |    |          |   |          |
|------------|-----------|----|----------|---|----------|
| rs10827499 | C10orf112 | 10 | 19820549 | 3 | 0.370532 |
| rs10827499 | C10orf112 | 10 | 19820549 | 2 | 1.655242 |
| rs10827628 | C10orf112 | 10 | 19924270 | 1 | 3.205379 |
| rs10827628 | C10orf112 | 10 | 19924270 | 3 | 0.096137 |
| rs10827628 | C10orf112 | 10 | 19924270 | 6 | 3.28019  |
| rs2778979  | PLXDC2    | 10 | 20574339 | 8 | 9.691453 |
| rs7074847  | SPAG6     | 10 | 22715863 | 3 | 1.022128 |
| rs1539322  | SPAG6     | 10 | 22745781 | 7 | 2.632581 |
| rs4747442  | LOC643475 | 10 | 22884105 | 7 | 0.285762 |
| rs4747442  | LOC643475 | 10 | 22884105 | 5 | 0.438273 |
| rs4747442  | LOC643475 | 10 | 22884105 | 4 | 0.141663 |
| rs4747443  | LOC643475 | 10 | 22884332 | 5 | 0.412827 |
| rs4748813  | LOC643475 | 10 | 22886741 | 4 | 0.204033 |
| rs4748814  | LOC643475 | 10 | 22887204 | 4 | 0.067274 |
| rs4748814  | LOC643475 | 10 | 22887204 | 2 | 4.467864 |
| rs4748814  | LOC643475 | 10 | 22887204 | 7 | 0.858511 |
| rs7094131  | LOC643475 | 10 | 22887445 | 7 | 0.623215 |
| rs7094131  | LOC643475 | 10 | 22887445 | 4 | 0.532682 |
| rs4326695  | C10orf67  | 10 | 23645936 | 1 | 0.419505 |
| rs2297329  | KIAA1217  | 10 | 24853288 | 3 | 0.356737 |
| rs2307047  | C10orf63  | 10 | 25311276 | 3 | 0.899395 |
| rs12257119 | MYO3A     | 10 | 26326165 | 2 | 0.025883 |
| rs12257119 | MYO3A     | 10 | 26326165 | 1 | 1.066508 |
| rs3824699  | MYO3A     | 10 | 26395998 | 3 | 0.817184 |
| rs3758449  | MYO3A     | 10 | 26486318 | 8 | 0.907218 |
| rs3758449  | MYO3A     | 10 | 26486318 | 3 | 0.120443 |
| rs3740232  | MYO3A     | 10 | 26502796 | 5 | 0.897995 |
| rs3740232  | MYO3A     | 10 | 26502796 | 3 | 0.362895 |
| rs1999240  | MYO3A     | 10 | 26503136 | 7 | 0.615825 |
| rs1999240  | MYO3A     | 10 | 26503136 | 3 | 0.558666 |
| rs1999240  | MYO3A     | 10 | 26503136 | 1 | 2.293791 |
| rs10829163 | ANKRD26   | 10 | 27357846 | 7 | 0.733916 |
| rs2297145  | ANKRD26   | 10 | 27421355 | 7 | 1.803533 |
| rs3737056  | ANKRD26   | 10 | 27429320 | 7 | 1.093755 |
| rs10764690 | ACBD5     | 10 | 27548764 | 4 | 0.152115 |
| rs10764690 | ACBD5     | 10 | 27548764 | 5 | 0.252094 |
| rs10764690 | ACBD5     | 10 | 27548764 | 8 | 2.94573  |
| rs2505323  | PTCHD3    | 10 | 27727231 | 8 | 3.967471 |
| rs2505323  | PTCHD3    | 10 | 27727231 | 4 | 2.59624  |
| rs2505323  | PTCHD3    | 10 | 27727231 | 5 | 2.57249  |
| rs1638630  | PTCHD3    | 10 | 27727781 | 4 | 3.478834 |
| rs2505327  | PTCHD3    | 10 | 27727971 | 6 | 3.843355 |
| rs2505327  | PTCHD3    | 10 | 27727971 | 3 | 0.541254 |
| rs2505327  | PTCHD3    | 10 | 27727971 | 8 | 2.431197 |
| rs2505327  | PTCHD3    | 10 | 27727971 | 4 | 3.925542 |
| rs2484173  | PTCHD3    | 10 | 27728000 | 4 | 3.892377 |
| rs2484173  | PTCHD3    | 10 | 27728000 | 3 | 1.959534 |

|            |          |    |          |   |          |
|------------|----------|----|----------|---|----------|
| rs2484173  | PTCHD3   | 10 | 27728000 | 8 | 5.527506 |
| rs2484173  | PTCHD3   | 10 | 27728000 | 6 | 4.635059 |
| rs2484173  | PTCHD3   | 10 | 27728000 | 2 | 4.623122 |
| rs2429485  | PTCHD3   | 10 | 27728115 | 5 | 1.484926 |
| rs2429485  | PTCHD3   | 10 | 27728115 | 4 | 4.259051 |
| rs2429485  | PTCHD3   | 10 | 27728115 | 3 | 0.470554 |
| rs2429485  | PTCHD3   | 10 | 27728115 | 6 | 4.654571 |
| rs2429485  | PTCHD3   | 10 | 27728115 | 2 | 2.786904 |
| rs6482625  | PTCHD3   | 10 | 27742175 | 8 | 3.701364 |
| rs6482625  | PTCHD3   | 10 | 27742175 | 3 | 5.002977 |
| rs6482625  | PTCHD3   | 10 | 27742175 | 6 | 1.591055 |
| rs6482626  | PTCHD3   | 10 | 27742731 | 6 | 2.353918 |
| rs6482626  | PTCHD3   | 10 | 27742731 | 3 | 0.521566 |
| rs11015754 | PTCHD3   | 10 | 27742750 | 8 | 1.919972 |
| rs2492909  | MKX      | 10 | 28003252 | 7 | 0.244737 |
| rs2492909  | MKX      | 10 | 28003252 | 3 | 0.194794 |
| rs2172085  | MKX      | 10 | 28003678 | 3 | 0.046875 |
| rs2172085  | MKX      | 10 | 28003678 | 4 | 0.89418  |
| rs2172085  | MKX      | 10 | 28003678 | 7 | 0.360815 |
| rs2130809  | MKX      | 10 | 28003898 | 3 | 0.442525 |
| rs2130809  | MKX      | 10 | 28003898 | 4 | 1.338984 |
| rs2253230  | MKX      | 10 | 28004476 | 4 | 1.210611 |
| rs2253230  | MKX      | 10 | 28004476 | 3 | 1.136125 |
| rs2253230  | MKX      | 10 | 28004476 | 1 | 0.23425  |
| rs11006957 | MPP7     | 10 | 28583741 | 6 | 1.004123 |
| rs11006957 | MPP7     | 10 | 28583741 | 2 | 1.172126 |
| rs11006957 | MPP7     | 10 | 28583741 | 7 | 0.091942 |
| rs1063205  | KIAA1462 | 10 | 30344924 | 2 | 1.890667 |
| rs1063205  | KIAA1462 | 10 | 30344924 | 7 | 0.3562   |
| rs3739998  | KIAA1462 | 10 | 30356078 | 7 | 0.519368 |
| rs3739998  | KIAA1462 | 10 | 30356078 | 3 | 0.590586 |
| rs2185724  | KIAA1462 | 10 | 30356214 | 7 | 0.486924 |
| rs3739996  | KIAA1462 | 10 | 30356878 | 7 | 0.069445 |
| rs3739996  | KIAA1462 | 10 | 30356878 | 5 | 0.617414 |
| rs9337951  | KIAA1462 | 10 | 30357079 | 5 | 1.305509 |
| rs9337951  | KIAA1462 | 10 | 30357079 | 3 | 0.870664 |
| rs9337951  | KIAA1462 | 10 | 30357079 | 8 | 3.332934 |
| rs9337951  | KIAA1462 | 10 | 30357079 | 7 | 3.988267 |
| rs9337951  | KIAA1462 | 10 | 30357079 | 2 | 2.367506 |
| rs7920682  | KIAA1462 | 10 | 30357832 | 5 | 0.41018  |
| rs7920682  | KIAA1462 | 10 | 30357832 | 7 | 0.275986 |
| rs2478835  | KIAA1462 | 10 | 30357955 | 3 | 0.559285 |
| rs2478835  | KIAA1462 | 10 | 30357955 | 5 | 0.29764  |
| rs2478835  | KIAA1462 | 10 | 30357955 | 2 | 2.001192 |
| rs2478835  | KIAA1462 | 10 | 30357955 | 7 | 0.991477 |
| rs8177036  | MAP3K8   | 10 | 30790650 | 4 | 3.393874 |
| rs8177036  | MAP3K8   | 10 | 30790650 | 5 | 0.036451 |

|               |           |    |          |   |          |
|---------------|-----------|----|----------|---|----------|
| rs2994626     | ZNF438    | 10 | 31239356 | 1 | 5.927479 |
| rs2994626     | ZNF438    | 10 | 31239356 | 3 | 1.160566 |
| SNP10-3262021 | EPC1      | 10 | 32620211 | 4 | 6.83033  |
| rs11009107    | C1orf68   | 10 | 33163780 | 5 | 0.142367 |
| rs11009107    | C1orf68   | 10 | 33163780 | 3 | 1.870918 |
| rs11009107    | C1orf68   | 10 | 33163780 | 4 | 2.94578  |
| rs11009107    | C1orf68   | 10 | 33163780 | 7 | 0.103017 |
| rs2504011     | C1orf68   | 10 | 33177557 | 3 | 0.080552 |
| rs2504011     | C1orf68   | 10 | 33177557 | 7 | 0.475775 |
| rs2504011     | C1orf68   | 10 | 33177557 | 5 | 0.136665 |
| rs1316757     | ITGB1     | 10 | 33237203 | 3 | 0.810735 |
| rs7079624     | ITGB1     | 10 | 33257116 | 3 | 0.00595  |
| rs13324       | NRP1      | 10 | 33507656 | 4 | 5.976103 |
| rs13324       | NRP1      | 10 | 33507656 | 3 | 0.139463 |
| rs2506144     | NRP1      | 10 | 33508462 | 4 | 6.642202 |
| rs2228638     | NRP1      | 10 | 33515288 | 6 | 0.744325 |
| rs2228638     | NRP1      | 10 | 33515288 | 3 | 0.330521 |
| rs2228638     | NRP1      | 10 | 33515288 | 4 | 0.999671 |
| rs3750733     | NRP1      | 10 | 33663257 | 4 | 0.160703 |
| rs17499247    | CREM      | 10 | 35466761 | 2 | 0.218505 |
| rs17499247    | CREM      | 10 | 35466761 | 5 | 0.767421 |
| rs17499247    | CREM      | 10 | 35466761 | 8 | 0.268209 |
| rs17499247    | CREM      | 10 | 35466761 | 1 | 0.353027 |
| rs17499247    | CREM      | 10 | 35466761 | 3 | 0.591755 |
| rs1209750     | ANKRD30A  | 10 | 37528695 | 1 | 3.077947 |
| rs7091441     | hCG_25653 | 10 | 37675828 | 1 | 2.679891 |
| rs2295872     | ZNF248    | 10 | 38186224 | 8 | 3.566149 |
| rs2295872     | ZNF248    | 10 | 38186224 | 1 | 6.05894  |
| rs1148295     | ZNF248    | 10 | 38186265 | 8 | 1.847367 |
| rs1148295     | ZNF248    | 10 | 38186265 | 7 | 4.407538 |
| rs1148295     | ZNF248    | 10 | 38186265 | 3 | 0.334285 |
| rs10508862    | ZNF33A    | 10 | 38385471 | 7 | 3.581092 |
| rs10508862    | ZNF33A    | 10 | 38385471 | 3 | 0.37602  |
| rs10508862    | ZNF33A    | 10 | 38385471 | 8 | 0.412998 |
| rs2142349     | ZNF33A    | 10 | 38386098 | 4 | 5.596322 |
| rs2472161     | ZNF33A    | 10 | 38386162 | 8 | 0.128412 |
| rs2472165     | ZNF33A    | 10 | 38387812 | 8 | 4.530655 |
| rs2472165     | ZNF33A    | 10 | 38387812 | 3 | 0.143172 |
| rs2472165     | ZNF33A    | 10 | 38387812 | 7 | 0.049732 |
| rs2472175     | LOC340947 | 10 | 38422907 | 4 | 3.027816 |
| rs2472175     | LOC340947 | 10 | 38422907 | 7 | 3.607618 |
| rs2472175     | LOC340947 | 10 | 38422907 | 1 | 3.276801 |
| rs2474570     | LOC340947 | 10 | 38423763 | 3 | 0.524011 |
| rs2505860     | CCNYL2    | 10 | 42227207 | 1 | 1.988833 |
| rs2505861     | CCNYL2    | 10 | 42227266 | 1 | 2.578002 |
| rs12261168    | ZNF33B    | 10 | 42404995 | 3 | 0.644703 |
| rs12261168    | ZNF33B    | 10 | 42404995 | 7 | 4.513384 |

|                |          |    |          |   |          |
|----------------|----------|----|----------|---|----------|
| rs12261168     | ZNF33B   | 10 | 42404995 | 4 | 4.293138 |
| rs1799939      | RET      | 10 | 42930125 | 7 | 0.489257 |
| rs1800861      | RET      | 10 | 42933849 | 3 | 0.227412 |
| rs1800861      | RET      | 10 | 42933849 | 5 | 0.115175 |
| rs2075912      | RET      | 10 | 42942223 | 3 | 0.388078 |
| rs2075912      | RET      | 10 | 42942223 | 5 | 0.558582 |
| rs17028        | RET      | 10 | 42943818 | 3 | 0.37321  |
| rs17028        | RET      | 10 | 42943818 | 5 | 0.759544 |
| rs17028        | RET      | 10 | 42943818 | 1 | 2.768722 |
| SNP10-42944111 | RET      | 10 | 42944111 | 7 | 1.088881 |
| SNP10-42944111 | RET      | 10 | 42944111 | 1 | 0.128171 |
| rs2435355      | RET      | 10 | 42944839 | 3 | 1.777448 |
| rs2435355      | RET      | 10 | 42944839 | 1 | 1.894762 |
| rs1254967      | RASGEF1A | 10 | 43010397 | 5 | 0.35445  |
| rs1254967      | RASGEF1A | 10 | 43010397 | 3 | 0.039662 |
| rs10793442     | ZNF239   | 10 | 43371825 | 7 | 1.122762 |
| rs10793442     | ZNF239   | 10 | 43371825 | 5 | 0.861794 |
| rs10793442     | ZNF239   | 10 | 43371825 | 2 | 5.321347 |
| rs2999277      | ZNF239   | 10 | 43371907 | 4 | 0.360713 |
| rs2999277      | ZNF239   | 10 | 43371907 | 8 | 7.131142 |
| rs2999277      | ZNF239   | 10 | 43371907 | 1 | 6.454421 |
| rs2999277      | ZNF239   | 10 | 43371907 | 3 | 0.478236 |
| rs2230660      | ZNF239   | 10 | 43373019 | 1 | 5.063129 |
| rs2230660      | ZNF239   | 10 | 43373019 | 4 | 0.422769 |
| rs2393938      | ZNF239   | 10 | 43383818 | 5 | 1.207565 |
| rs2393938      | ZNF239   | 10 | 43383818 | 7 | 1.806146 |
| rs1998748      | HNRPA3P1 | 10 | 43605165 | 8 | 1.511497 |
| rs1998748      | HNRPA3P1 | 10 | 43605165 | 3 | 1.611523 |
| rs266093       | CXCL12   | 10 | 44186214 | 3 | 1.54444  |
| rs17886066     | CXCL12   | 10 | 44194001 | 4 | 0.882751 |
| rs12773699     | RASSF4   | 10 | 44775233 | 8 | 4.05802  |
| rs870957       | RASSF4   | 10 | 44798098 | 3 | 0.204717 |
| rs11239305     | RASSF4   | 10 | 44809230 | 3 | 0.603499 |
| rs11239305     | RASSF4   | 10 | 44809230 | 8 | 5.075356 |
| rs12269028     | C10orf25 | 10 | 44816126 | 2 | 5.724641 |
| rs12269028     | C10orf25 | 10 | 44816126 | 6 | 5.005913 |
| SNP10-44816132 | C10orf25 | 10 | 44816132 | 3 | 0.292799 |
| SNP10-44816132 | C10orf25 | 10 | 44816132 | 8 | 4.037671 |
| rs3740092      | ZNF22    | 10 | 44819278 | 3 | 0.159826 |
| rs1048156      | PPYR1    | 10 | 46507377 | 7 | 0.223384 |
| rs1048156      | PPYR1    | 10 | 46507377 | 1 | 1.872668 |
| rs2999345      | SLC9A3P4 | 10 | 47486220 | 3 | 0.306443 |
| rs3739968      | ASAH2C   | 10 | 47523998 | 8 | 4.101578 |
| rs3739968      | ASAH2C   | 10 | 47523998 | 7 | 4.19184  |
| rs3739968      | ASAH2C   | 10 | 47523998 | 6 | 2.641218 |
| rs3739968      | ASAH2C   | 10 | 47523998 | 2 | 5.021584 |
| rs11204210     | ZNF488   | 10 | 47990601 | 6 | 0.568209 |

|                |           |    |          |   |          |
|----------------|-----------|----|----------|---|----------|
| rs11204210     | ZNF488    | 10 | 47990601 | 5 | 0.000295 |
| rs11204210     | ZNF488    | 10 | 47990601 | 1 | 0.376341 |
| rs11204210     | ZNF488    | 10 | 47990601 | 4 | 0.80891  |
| rs11204210     | ZNF488    | 10 | 47990601 | 2 | 1.27012  |
| rs11204210     | ZNF488    | 10 | 47990601 | 7 | 0.688321 |
| SNP10-47991283 | ZNF488    | 10 | 47991283 | 4 | 0.117262 |
| SNP10-47991283 | ZNF488    | 10 | 47991283 | 7 | 0.211993 |
| rs17095800     | ZNF488    | 10 | 47992263 | 2 | 4.314974 |
| rs4080665      | ARHGAP22  | 10 | 49357806 | 5 | 1.161883 |
| rs4080665      | ARHGAP22  | 10 | 49357806 | 2 | 3.231394 |
| rs7072606      | C10orf64  | 10 | 49603980 | 5 | 0.44162  |
| rs4838645      | LOC642343 | 10 | 49614255 | 8 | 4.939486 |
| rs17773851     | C10orf73  | 10 | 50010310 | 3 | 1.460982 |
| SNP10-50205192 | C10orf71  | 10 | 50205192 | 3 | 1.291237 |
| SNP10-50205192 | C10orf71  | 10 | 50205192 | 2 | 1.289349 |
| SNP10-50205192 | C10orf71  | 10 | 50205192 | 6 | 1.415791 |
| SNP10-50417077 | ERCC6     | 10 | 50417077 | 5 | 4.116185 |
| SNP10-50417077 | ERCC6     | 10 | 50417077 | 2 | 5.737489 |
| rs3729496      | CHAT      | 10 | 50491197 | 5 | 0.400966 |
| rs3729496      | CHAT      | 10 | 50491197 | 7 | 0.960067 |
| rs8178992      | CHAT      | 10 | 50533153 | 4 | 1.947925 |
| rs8178992      | CHAT      | 10 | 50533153 | 3 | 2.424871 |
| rs6816         | OGDHL     | 10 | 50612769 | 4 | 0.228213 |
| rs6816         | OGDHL     | 10 | 50612769 | 5 | 0.496231 |
| rs13736        | OGDHL     | 10 | 50613074 | 4 | 0.386202 |
| rs13736        | OGDHL     | 10 | 50613074 | 5 | 1.107613 |
| rs1258256      | OGDHL     | 10 | 50613192 | 5 | 0.514109 |
| rs11101224     | OGDHL     | 10 | 50620982 | 7 | 0.123264 |
| rs11101224     | OGDHL     | 10 | 50620982 | 3 | 0.257979 |
| rs1258184      | OGDHL     | 10 | 50630215 | 6 | 2.800584 |
| rs1258184      | OGDHL     | 10 | 50630215 | 4 | 0.005424 |
| rs1258184      | OGDHL     | 10 | 50630215 | 5 | 1.555467 |
| rs1258184      | OGDHL     | 10 | 50630215 | 2 | 1.066918 |
| rs11006229     | SGMS1     | 10 | 52020012 | 3 | 0.418475 |
| rs11006229     | SGMS1     | 10 | 52020012 | 5 | 2.195436 |
| rs11006229     | SGMS1     | 10 | 52020012 | 6 | 1.111605 |
| rs4497350      | LOC729047 | 10 | 52169886 | 8 | 1.151325 |
| rs1881597      | PRKG1     | 10 | 53723823 | 7 | 1.841671 |
| rs1881597      | PRKG1     | 10 | 53723823 | 6 | 0.042473 |
| rs1896368      | LOC440558 | 10 | 53738910 | 5 | 0.598565 |
| rs1896368      | LOC440558 | 10 | 53738910 | 7 | 0.603336 |
| rs930507       | MBL2      | 10 | 54198272 | 3 | 0.034565 |
| rs11004439     | PCDH15    | 10 | 56093974 | 3 | 1.555155 |
| rs11005328     | ZWINT     | 10 | 57790994 | 1 | 2.842731 |
| rs1049432      | TFAM      | 10 | 59825126 | 3 | 0.461992 |
| rs1049432      | TFAM      | 10 | 59825126 | 5 | 4.992768 |
| rs1049432      | TFAM      | 10 | 59825126 | 4 | 6.610035 |

|                |           |    |          |   |          |
|----------------|-----------|----|----------|---|----------|
| rs1049432      | TFAM      | 10 | 59825126 | 6 | 1.359724 |
| rs4948550      | BICC1     | 10 | 60258559 | 1 | 2.283407 |
| rs4948550      | BICC1     | 10 | 60258559 | 5 | 0.189642 |
| rs2452505      | PHYHIPL   | 10 | 60675250 | 5 | 0.377992 |
| rs17776046     | SLC16A9   | 10 | 61082207 | 6 | 1.806577 |
| rs17776046     | SLC16A9   | 10 | 61082207 | 5 | 0.917565 |
| rs3763747      | SLC16A9   | 10 | 61082341 | 5 | 0.728773 |
| rs2242206      | SLC16A9   | 10 | 61084017 | 7 | 0.694586 |
| rs2242206      | SLC16A9   | 10 | 61084017 | 5 | 2.506656 |
| rs2242206      | SLC16A9   | 10 | 61084017 | 1 | 2.999278 |
| rs12356776     | ANK3      | 10 | 61489562 | 1 | 3.4366   |
| SNP10-61501657 | ANK3      | 10 | 61501657 | 6 | 1.206512 |
| rs17208576     | ANK3      | 10 | 61504579 | 4 | 5.648045 |
| rs3750800      | ANK3      | 10 | 61538722 | 8 | 1.497731 |
| rs10994754     | TMEM26    | 10 | 62836779 | 3 | 0.411702 |
| rs2176929      | TMEM26    | 10 | 62837138 | 5 | 2.561956 |
| rs2280449      | TMEM26    | 10 | 62839957 | 5 | 0.917676 |
| rs1992625      | C10orf107 | 10 | 63190704 | 3 | 0.931765 |
| rs1992625      | C10orf107 | 10 | 63190704 | 6 | 0.054615 |
| SNP10-63646920 | RTKN2     | 10 | 63646920 | 7 | 1.40049  |
| SNP10-63646920 | RTKN2     | 10 | 63646920 | 4 | 0.529774 |
| rs11819488     | ZNF365    | 10 | 63909715 | 1 | 5.912771 |
| rs729739       | ZNF365    | 10 | 64100308 | 3 | 0.237521 |
| rs10995311     | ADO       | 10 | 64234940 | 4 | 0.70702  |
| rs10995311     | ADO       | 10 | 64234940 | 2 | 3.673858 |
| rs10995311     | ADO       | 10 | 64234940 | 8 | 8.425517 |
| rs1509964      | ADO       | 10 | 64237370 | 5 | 0.808643 |
| rs1227236      | ANXA2P3   | 10 | 66256311 | 5 | 0.459572 |
| rs2273771      | DNAJC12   | 10 | 69267792 | 4 | 5.921671 |
| rs2273771      | DNAJC12   | 10 | 69267792 | 3 | 0.037635 |
| rs2273771      | DNAJC12   | 10 | 69267792 | 7 | 0.309308 |
| rs2273771      | DNAJC12   | 10 | 69267792 | 8 | 4.417839 |
| rs2234975      | SIRT1     | 10 | 69348084 | 3 | 0.601538 |
| rs2673794      | MYPN      | 10 | 69596103 | 1 | 4.722919 |
| rs2673794      | MYPN      | 10 | 69596103 | 7 | 4.438302 |
| rs2673794      | MYPN      | 10 | 69596103 | 6 | 4.4561   |
| rs731063       | PBLD      | 10 | 69713196 | 8 | 0.15783  |
| rs731063       | PBLD      | 10 | 69713196 | 1 | 0.094174 |
| rs731063       | PBLD      | 10 | 69713196 | 2 | 0.989796 |
| rs4142048      | PBLD      | 10 | 69714037 | 8 | 6.862468 |
| rs4142048      | PBLD      | 10 | 69714037 | 1 | 0.694748 |
| rs4142048      | PBLD      | 10 | 69714037 | 2 | 0.802378 |
| rs1162756      | HNRPH3    | 10 | 69772942 | 6 | 0.075148 |
| rs1801041      | DNA2      | 10 | 69844713 | 7 | 0.275885 |
| rs1801041      | DNA2      | 10 | 69844713 | 6 | 0.660312 |
| rs1801041      | DNA2      | 10 | 69844713 | 4 | 0.343727 |
| rs1535539      | DNA2      | 10 | 69901707 | 1 | 2.677509 |



|                |           |    |          |   |          |
|----------------|-----------|----|----------|---|----------|
| rs1535539      | DNA2      | 10 | 69901707 | 6 | 0.701793 |
| rs10998219     | SLC25A16  | 10 | 69912911 | 6 | 0.430305 |
| rs10823229     | CXXC6     | 10 | 70002586 | 7 | 0.659487 |
| rs10823229     | CXXC6     | 10 | 70002586 | 2 | 3.435234 |
| rs10823229     | CXXC6     | 10 | 70002586 | 1 | 0.007858 |
| rs10823229     | CXXC6     | 10 | 70002586 | 3 | 0.647215 |
| rs10823229     | CXXC6     | 10 | 70002586 | 4 | 4.130752 |
| rs10509304     | STOX1     | 10 | 70315113 | 8 | 2.104523 |
| rs10509306     | STOX1     | 10 | 70315703 | 1 | 5.248794 |
| rs5030895      | DDX50     | 10 | 70366719 | 3 | 0.093615 |
| rs5030895      | DDX50     | 10 | 70366719 | 2 | 0.515355 |
| rs5030900      | DDX50     | 10 | 70370950 | 3 | 0.147863 |
| rs5030900      | DDX50     | 10 | 70370950 | 1 | 0.054035 |
| rs10823277     | LOC389976 | 10 | 70453081 | 8 | 2.947487 |
| rs12437        | SRGN      | 10 | 70534071 | 3 | 0.876996 |
| rs12437        | SRGN      | 10 | 70534071 | 4 | 0.500328 |
| rs2292192      | SUPV3L1   | 10 | 70610197 | 4 | 2.015    |
| rs10823320     | HKDC1     | 10 | 70657066 | 3 | 0.16885  |
| rs874556       | HKDC1     | 10 | 70662670 | 7 | 0.159735 |
| rs874556       | HKDC1     | 10 | 70662670 | 5 | 0.045386 |
| rs874556       | HKDC1     | 10 | 70662670 | 6 | 2.068717 |
| rs2611         | HKDC1     | 10 | 70697237 | 7 | 1.870702 |
| rs2611         | HKDC1     | 10 | 70697237 | 4 | 0.241824 |
| rs2611         | HKDC1     | 10 | 70697237 | 2 | 0.209977 |
| rs2611         | HKDC1     | 10 | 70697237 | 3 | 0.557912 |
| rs2611         | HKDC1     | 10 | 70697237 | 1 | 0.062078 |
| rs1133189      | HK1       | 10 | 70773603 | 3 | 0.083009 |
| rs1133189      | HK1       | 10 | 70773603 | 7 | 0.268593 |
| rs1133189      | HK1       | 10 | 70773603 | 5 | 0.073621 |
| rs12020        | C10orf35  | 10 | 71062563 | 1 | 0.334684 |
| rs12020        | C10orf35  | 10 | 71062563 | 2 | 0.832223 |
| rs12020        | C10orf35  | 10 | 71062563 | 4 | 0.105981 |
| rs1052152      | C10orf35  | 10 | 71062698 | 4 | 6.841353 |
| rs1052152      | C10orf35  | 10 | 71062698 | 2 | 0.096475 |
| rs1052152      | C10orf35  | 10 | 71062698 | 1 | 0.428124 |
| rs2395272      | COL13A1   | 10 | 71310261 | 3 | 0.829188 |
| rs2395272      | COL13A1   | 10 | 71310261 | 6 | 0.377125 |
| rs2395272      | COL13A1   | 10 | 71310261 | 4 | 0.092785 |
| rs1061966      | COL13A1   | 10 | 71388730 | 1 | 4.91065  |
| rs2394655      | AIFM2     | 10 | 71542141 | 3 | 0.13481  |
| rs10823484     | AIFM2     | 10 | 71542578 | 3 | 0.876608 |
| rs7893137      | AIFM2     | 10 | 71542953 | 3 | 0.395465 |
| rs7908957      | AIFM2     | 10 | 71543587 | 3 | 0.694397 |
| rs10999144     | AIFM2     | 10 | 71543925 | 1 | 4.351006 |
| SNP10-71550864 | AIFM2     | 10 | 71550864 | 7 | 0.101268 |
| rs3750774      | TYSND1    | 10 | 71575575 | 4 | 0.505177 |
| rs3750774      | TYSND1    | 10 | 71575575 | 8 | 0.451025 |

|                |          |    |          |   |          |
|----------------|----------|----|----------|---|----------|
| rs3750774      | TYSND1   | 10 | 71575575 | 5 | 0.393875 |
| rs3750774      | TYSND1   | 10 | 71575575 | 1 | 0.565998 |
| rs10999250     | LRRRC20  | 10 | 71731005 | 4 | 1.211356 |
| rs1904589      | NODAL    | 10 | 71865445 | 7 | 0.10077  |
| rs1904589      | NODAL    | 10 | 71865445 | 8 | 0.270784 |
| rs1904589      | NODAL    | 10 | 71865445 | 5 | 0.818041 |
| rs1904589      | NODAL    | 10 | 71865445 | 3 | 0.097805 |
| rs1904589      | NODAL    | 10 | 71865445 | 4 | 0.13508  |
| rs1904589      | NODAL    | 10 | 71865445 | 1 | 0.654986 |
| rs2275059      | KIAA1274 | 10 | 71959707 | 3 | 0.801958 |
| rs2275060      | KIAA1274 | 10 | 71959784 | 8 | 0.198245 |
| rs3740447      | KIAA1274 | 10 | 71977107 | 3 | 1.024675 |
| SNP10-71996406 | KIAA1274 | 10 | 71996406 | 6 | 0.590981 |
| rs3740444      | KIAA1274 | 10 | 71996689 | 1 | 1.262523 |
| rs3740444      | KIAA1274 | 10 | 71996689 | 5 | 0.208514 |
| rs3740442      | KIAA1274 | 10 | 71996948 | 6 | 1.444687 |
| rs3740442      | KIAA1274 | 10 | 71996948 | 7 | 0.398562 |
| rs1889490      | PRF1     | 10 | 72027719 | 3 | 0.214053 |
| rs1889490      | PRF1     | 10 | 72027719 | 5 | 0.440998 |
| rs1889490      | PRF1     | 10 | 72027719 | 4 | 0.606418 |
| rs10823607     | ADAMTS14 | 10 | 72170769 | 2 | 0.171917 |
| rs2587475      | ADAMTS14 | 10 | 72183688 | 7 | 0.407555 |
| rs2587475      | ADAMTS14 | 10 | 72183688 | 5 | 1.446157 |
| rs2587475      | ADAMTS14 | 10 | 72183688 | 1 | 0.295105 |
| rs10999516     | ADAMTS14 | 10 | 72187836 | 5 | 0.48243  |
| rs827249       | SGPL1    | 10 | 72299573 | 7 | 4.730491 |
| rs1060184      | UNC5B    | 10 | 72729364 | 6 | 0.073513 |
| rs1060184      | UNC5B    | 10 | 72729364 | 5 | 0.544508 |
| rs1060184      | UNC5B    | 10 | 72729364 | 3 | 0.302853 |
| rs1060184      | UNC5B    | 10 | 72729364 | 8 | 8.36786  |
| rs1084004      | SLC29A3  | 10 | 72791951 | 8 | 5.870646 |
| rs2275579      | SLC29A3  | 10 | 72793082 | 4 | 1.618816 |
| rs3802720      | CDH23    | 10 | 72940912 | 1 | 4.044562 |
| rs3802720      | CDH23    | 10 | 72940912 | 3 | 1.24071  |
| rs10999947     | CDH23    | 10 | 73104912 | 1 | 0.578513 |
| rs3752752      | CDH23    | 10 | 73125207 | 5 | 0.82808  |
| rs3752752      | CDH23    | 10 | 73125207 | 3 | 0.0513   |
| rs3752752      | CDH23    | 10 | 73125207 | 1 | 1.743241 |
| rs3752751      | CDH23    | 10 | 73125279 | 3 | 0.506617 |
| SNP10-73160316 | CDH23    | 10 | 73160316 | 1 | 5.27187  |
| SNP10-73160316 | CDH23    | 10 | 73160316 | 5 | 4.0528   |
| rs1227065      | CDH23    | 10 | 73162085 | 1 | 1.292256 |
| rs1227065      | CDH23    | 10 | 73162085 | 3 | 1.230503 |
| rs1227051      | CDH23    | 10 | 73171562 | 1 | 0.01291  |
| rs1227051      | CDH23    | 10 | 73171562 | 2 | 0.823896 |
| rs1227051      | CDH23    | 10 | 73171562 | 3 | 0.922706 |
| rs748113       | C10orf54 | 10 | 73178797 | 5 | 0.048908 |

|                |          |    |          |   |          |
|----------------|----------|----|----------|---|----------|
| rs748113       | C10orf54 | 10 | 73178797 | 2 | 0.761684 |
| rs748113       | C10orf54 | 10 | 73178797 | 3 | 0.631123 |
| rs748113       | C10orf54 | 10 | 73178797 | 7 | 0.408579 |
| rs748113       | C10orf54 | 10 | 73178797 | 1 | 0.923105 |
| rs748505       | C10orf54 | 10 | 73179772 | 1 | 2.866894 |
| rs748505       | C10orf54 | 10 | 73179772 | 7 | 0.195428 |
| SNP10-73203183 | C10orf54 | 10 | 73203183 | 3 | 0.239608 |
| SNP10-73203183 | C10orf54 | 10 | 73203183 | 7 | 0.456568 |
| SNP10-73203183 | C10orf54 | 10 | 73203183 | 2 | 5.249336 |
| SNP10-73203183 | C10orf54 | 10 | 73203183 | 1 | 0.138425 |
| rs17712523     | CDH23    | 10 | 73207620 | 3 | 1.119819 |
| rs17712523     | CDH23    | 10 | 73207620 | 7 | 0.068306 |
| rs3802711      | CDH23    | 10 | 73214092 | 8 | 0.595714 |
| rs11592462     | CDH23    | 10 | 73220123 | 1 | 1.794244 |
| rs11592462     | CDH23    | 10 | 73220123 | 2 | 0.643305 |
| rs11592462     | CDH23    | 10 | 73220123 | 4 | 1.080426 |
| rs10466026     | CDH23    | 10 | 73220975 | 5 | 3.143649 |
| rs10466026     | CDH23    | 10 | 73220975 | 4 | 0.931787 |
| rs10466026     | CDH23    | 10 | 73220975 | 8 | 3.272905 |
| rs2290021      | CDH23    | 10 | 73244849 | 4 | 0.700896 |
| rs2070188      | PSAP     | 10 | 73280988 | 5 | 0.562845 |
| rs3740129      | CHST3    | 10 | 73437865 | 5 | 0.26293  |
| rs3740129      | CHST3    | 10 | 73437865 | 6 | 1.063808 |
| rs3740129      | CHST3    | 10 | 73437865 | 7 | 0.188411 |
| rs3740129      | CHST3    | 10 | 73437865 | 1 | 2.861845 |
| rs1871452      | CHST3    | 10 | 73442667 | 1 | 5.250543 |
| rs1871452      | CHST3    | 10 | 73442667 | 8 | 4.307011 |
| rs1871452      | CHST3    | 10 | 73442667 | 7 | 5.930022 |
| rs1871452      | CHST3    | 10 | 73442667 | 6 | 0.321058 |
| rs1871452      | CHST3    | 10 | 73442667 | 5 | 0.04831  |
| rs7307         | SPOCK2   | 10 | 73488939 | 7 | 3.18348  |
| rs7307         | SPOCK2   | 10 | 73488939 | 3 | 0.291918 |
| rs7307         | SPOCK2   | 10 | 73488939 | 6 | 1.58165  |
| rs7307         | SPOCK2   | 10 | 73488939 | 4 | 2.796139 |
| rs7307         | SPOCK2   | 10 | 73488939 | 5 | 1.333277 |
| rs7307         | SPOCK2   | 10 | 73488939 | 1 | 4.179596 |
| rs1049269      | SPOCK2   | 10 | 73490007 | 1 | 4.218668 |
| rs1049269      | SPOCK2   | 10 | 73490007 | 5 | 0.192863 |
| rs1049269      | SPOCK2   | 10 | 73490007 | 8 | 0.994482 |
| rs1049269      | SPOCK2   | 10 | 73490007 | 6 | 0.070337 |
| rs1049269      | SPOCK2   | 10 | 73490007 | 7 | 0.23319  |
| rs1049269      | SPOCK2   | 10 | 73490007 | 4 | 0.511881 |
| rs896079       | SPOCK2   | 10 | 73490402 | 5 | 1.762897 |
| rs896079       | SPOCK2   | 10 | 73490402 | 1 | 3.469005 |
| rs896079       | SPOCK2   | 10 | 73490402 | 7 | 1.618964 |
| rs896079       | SPOCK2   | 10 | 73490402 | 4 | 3.140226 |
| rs896079       | SPOCK2   | 10 | 73490402 | 3 | 0.074823 |

|                |           |    |          |   |          |
|----------------|-----------|----|----------|---|----------|
| rs896079       | SPOCK2    | 10 | 73490402 | 6 | 1.013528 |
| rs15256        | SPOCK2    | 10 | 73490554 | 3 | 1.478395 |
| rs15256        | SPOCK2    | 10 | 73490554 | 8 | 0.29409  |
| rs3180         | SPOCK2    | 10 | 73490628 | 7 | 3.816307 |
| rs3180         | SPOCK2    | 10 | 73490628 | 1 | 5.427369 |
| rs3180         | SPOCK2    | 10 | 73490628 | 8 | 0.103694 |
| rs3180         | SPOCK2    | 10 | 73490628 | 5 | 0.201621 |
| rs3180         | SPOCK2    | 10 | 73490628 | 6 | 0.000298 |
| rs3180         | SPOCK2    | 10 | 73490628 | 4 | 0.933577 |
| rs1049246      | SPOCK2    | 10 | 73492031 | 7 | 0.015274 |
| rs1049246      | SPOCK2    | 10 | 73492031 | 1 | 1.186952 |
| rs1049245      | SPOCK2    | 10 | 73492249 | 5 | 7.735084 |
| rs1049245      | SPOCK2    | 10 | 73492249 | 3 | 0.186414 |
| rs1049245      | SPOCK2    | 10 | 73492249 | 7 | 5.427973 |
| rs1049245      | SPOCK2    | 10 | 73492249 | 6 | 0.844717 |
| rs1049245      | SPOCK2    | 10 | 73492249 | 1 | 4.948673 |
| rs1049245      | SPOCK2    | 10 | 73492249 | 4 | 0.100168 |
| rs11591720     | ZMYND17   | 10 | 74854450 | 7 | 0.735366 |
| rs2227553      | C10orf55  | 10 | 75339949 | 1 | 3.298437 |
| rs2227568      | PLAU      | 10 | 75343885 | 4 | 0.815674 |
| rs2131956      | VCL       | 10 | 75541741 | 7 | 0.548655 |
| rs2131956      | VCL       | 10 | 75541741 | 3 | 0.601499 |
| rs2131956      | VCL       | 10 | 75541741 | 2 | 6.864528 |
| rs703258       | VCL       | 10 | 75549517 | 3 | 0.036858 |
| rs703258       | VCL       | 10 | 75549517 | 7 | 7.090466 |
| rs703258       | VCL       | 10 | 75549517 | 2 | 9.007542 |
| rs3740317      | DUSP13    | 10 | 76525418 | 4 | 0.96705  |
| rs3740317      | DUSP13    | 10 | 76525418 | 3 | 0.741098 |
| rs3740316      | DUSP13    | 10 | 76525427 | 1 | 0.622652 |
| rs3740316      | DUSP13    | 10 | 76525427 | 7 | 1.193072 |
| SNP10-76531686 | DUSP13    | 10 | 76531686 | 2 | 1.366849 |
| SNP10-76531686 | DUSP13    | 10 | 76531686 | 7 | 0.785191 |
| SNP10-76531686 | DUSP13    | 10 | 76531686 | 1 | 0.035062 |
| SNP10-76531686 | DUSP13    | 10 | 76531686 | 4 | 1.856946 |
| SNP10-76531686 | DUSP13    | 10 | 76531686 | 3 | 0.529441 |
| rs7912300      | DUSP13    | 10 | 76537905 | 3 | 0.454143 |
| rs10762666     | LOC439985 | 10 | 76827495 | 6 | 0.065974 |
| rs10762666     | LOC439985 | 10 | 76827495 | 4 | 0.580118 |
| rs11001819     | LOC729716 | 10 | 77985230 | 5 | 0.261931 |
| rs11001819     | LOC729716 | 10 | 77985230 | 3 | 0.741256 |
| rs12761718     | LOC399783 | 10 | 79162976 | 1 | 2.83864  |
| rs12761718     | LOC399783 | 10 | 79162976 | 4 | 0.005835 |
| rs12768275     | LOC399783 | 10 | 79163930 | 4 | 2.304395 |
| rs12768275     | LOC399783 | 10 | 79163930 | 1 | 5.024027 |
| rs2289310      | DLG5      | 10 | 79240879 | 6 | 1.014089 |
| rs1248629      | DLG5      | 10 | 79254184 | 1 | 6.05549  |
| rs1248629      | DLG5      | 10 | 79254184 | 3 | 0.063877 |

|            |           |    |          |   |          |
|------------|-----------|----|----------|---|----------|
| rs2241547  | POLR3A    | 10 | 79406970 | 8 | 0.651786 |
| rs2241547  | POLR3A    | 10 | 79406970 | 4 | 0.47372  |
| rs2241547  | POLR3A    | 10 | 79406970 | 5 | 0.000961 |
| rs1782652  | ZMIZ1     | 10 | 80744131 | 3 | 0.208581 |
| rs1782652  | ZMIZ1     | 10 | 80744131 | 2 | 2.579371 |
| rs1782652  | ZMIZ1     | 10 | 80744131 | 8 | 10.86702 |
| rs1782652  | ZMIZ1     | 10 | 80744131 | 7 | 5.861484 |
| rs3088308  | SFTPD     | 10 | 81687848 | 4 | 7.085073 |
| rs2243639  | SFTPD     | 10 | 81691702 | 8 | 6.331562 |
| rs2243639  | SFTPD     | 10 | 81691702 | 7 | 6.40214  |
| rs2243639  | SFTPD     | 10 | 81691702 | 4 | 1.047174 |
| rs2243639  | SFTPD     | 10 | 81691702 | 5 | 2.070338 |
| rs2243639  | SFTPD     | 10 | 81691702 | 3 | 1.963455 |
| rs2243639  | SFTPD     | 10 | 81691702 | 2 | 2.661547 |
| rs721917   | SFTPD     | 10 | 81696304 | 7 | 0.414784 |
| rs1932574  | C10orf57  | 10 | 81831672 | 8 | 0.241063 |
| rs1932574  | C10orf57  | 10 | 81831672 | 4 | 0.756211 |
| rs2789686  | ANXA11    | 10 | 81905116 | 7 | 0.431879 |
| rs17100686 | ANXA11    | 10 | 81917039 | 6 | 0.453391 |
| rs1832683  | MAT1A     | 10 | 82022311 | 3 | 1.005394 |
| rs1832683  | MAT1A     | 10 | 82022311 | 5 | 0.027863 |
| rs1832683  | MAT1A     | 10 | 82022311 | 4 | 3.546366 |
| rs2993763  | MAT1A     | 10 | 82023574 | 3 | 0.233887 |
| rs2993763  | MAT1A     | 10 | 82023574 | 6 | 0.929663 |
| rs10887711 | MAT1A     | 10 | 82024822 | 4 | 0.016995 |
| rs10887711 | MAT1A     | 10 | 82024822 | 3 | 1.125786 |
| rs10887711 | MAT1A     | 10 | 82024822 | 8 | 1.185562 |
| rs10788546 | MAT1A     | 10 | 82024834 | 4 | 0.812134 |
| rs10788546 | MAT1A     | 10 | 82024834 | 3 | 1.031883 |
| rs1143694  | MAT1A     | 10 | 82030032 | 4 | 0.279548 |
| rs1143694  | MAT1A     | 10 | 82030032 | 8 | 1.275949 |
| rs1143694  | MAT1A     | 10 | 82030032 | 3 | 1.011486 |
| rs1538818  | DYDC2     | 10 | 82112773 | 7 | 0.808207 |
| rs1047952  | DYDC2     | 10 | 82116788 | 4 | 0.515051 |
| rs8735     | C10orf58  | 10 | 82182693 | 3 | 0.422106 |
| rs8735     | C10orf58  | 10 | 82182693 | 5 | 0.468281 |
| rs8735     | C10orf58  | 10 | 82182693 | 8 | 0.972489 |
| rs11185932 | LOC727923 | 10 | 82285378 | 7 | 3.562619 |
| rs11185932 | LOC727923 | 10 | 82285378 | 6 | 0.757314 |
| rs11185932 | LOC727923 | 10 | 82285378 | 5 | 0.463271 |
| rs12257181 | SH2D4B    | 10 | 82394116 | 4 | 0.986182 |
| rs17107451 | SH2D4B    | 10 | 82394945 | 3 | 0.275081 |
| rs11186419 | SH2D4B    | 10 | 82395063 | 8 | 3.265709 |
| rs7087704  | SH2D4B    | 10 | 82395234 | 1 | 0.455229 |
| rs7087704  | SH2D4B    | 10 | 82395234 | 5 | 0.501232 |
| rs7081754  | SH2D4B    | 10 | 82395520 | 2 | 1.372345 |
| rs7081754  | SH2D4B    | 10 | 82395520 | 3 | 0.268133 |

|                |           |    |          |   |          |
|----------------|-----------|----|----------|---|----------|
| rs7081754      | SH2D4B    | 10 | 82395520 | 5 | 0.982668 |
| rs7077636      | SH2D4B    | 10 | 82395567 | 4 | 0.840859 |
| rs7096619      | LOC728027 | 10 | 85052021 | 1 | 5.184002 |
| rs7096619      | LOC728027 | 10 | 85052021 | 4 | 3.508707 |
| rs12781048     | PCDH21    | 10 | 85946248 | 5 | 0.514166 |
| rs10749482     | PCDH21    | 10 | 85962023 | 5 | 0.590056 |
| rs10749482     | PCDH21    | 10 | 85962023 | 2 | 2.466268 |
| rs10749482     | PCDH21    | 10 | 85962023 | 6 | 6.9516   |
| rs10749482     | PCDH21    | 10 | 85962023 | 3 | 1.523744 |
| rs3814212      | PCDH21    | 10 | 85964361 | 1 | 1.069922 |
| rs1059341      | PCDH21    | 10 | 85966945 | 6 | 0.058655 |
| rs1059342      | PCDH21    | 10 | 85967000 | 5 | 0.235679 |
| rs1059342      | PCDH21    | 10 | 85967000 | 7 | 4.607345 |
| rs1059342      | PCDH21    | 10 | 85967000 | 6 | 0.133807 |
| rs7074150      | LRIT2     | 10 | 85970295 | 3 | 4.562715 |
| rs4933982      | LRIT2     | 10 | 85970845 | 7 | 1.408124 |
| rs11200925     | LRIT2     | 10 | 85974303 | 5 | 0.428704 |
| rs11200925     | LRIT2     | 10 | 85974303 | 7 | 0.383101 |
| rs10887259     | LRIT1     | 10 | 85987230 | 5 | 0.072186 |
| rs10887259     | LRIT1     | 10 | 85987230 | 1 | 0.661807 |
| rs10887259     | LRIT1     | 10 | 85987230 | 3 | 0.258375 |
| rs10887259     | LRIT1     | 10 | 85987230 | 6 | 0.232671 |
| rs2279227      | RGR       | 10 | 85994853 | 7 | 0.148436 |
| rs2279227      | RGR       | 10 | 85994853 | 6 | 0.7916   |
| rs2279227      | RGR       | 10 | 85994853 | 1 | 2.01672  |
| rs2279227      | RGR       | 10 | 85994853 | 3 | 0.846254 |
| rs1042454      | RGR       | 10 | 86002693 | 5 | 0.675852 |
| rs1042454      | RGR       | 10 | 86002693 | 8 | 0.577593 |
| rs1042454      | RGR       | 10 | 86002693 | 1 | 2.072333 |
| SNP10-86007720 | RGR       | 10 | 86007720 | 7 | 0.086041 |
| rs1050943      | KIAA1128  | 10 | 86266936 | 4 | 0.745849 |
| rs1050943      | KIAA1128  | 10 | 86266936 | 2 | 4.902389 |
| rs2664404      | GRID1     | 10 | 87350703 | 5 | 0.649345 |
| rs7094132      | WAPAL     | 10 | 88193048 | 3 | 0.063322 |
| rs7094132      | WAPAL     | 10 | 88193048 | 5 | 0.556558 |
| rs34191521     | OPN4      | 10 | 88412008 | 4 | 1.010626 |
| rs1079610      | OPN4      | 10 | 88412096 | 7 | 1.305112 |
| rs4934281      | MMRN2     | 10 | 88692330 | 1 | 4.938396 |
| rs10887673     | MMRN2     | 10 | 88692370 | 6 | 1.891003 |
| rs3750823      | MMRN2     | 10 | 88707134 | 3 | 1.659226 |
| rs760113       | SNCG      | 10 | 88709769 | 7 | 0.319545 |
| rs286484       | C10orf59  | 10 | 90034883 | 1 | 4.534078 |
| rs2296545      | C10orf59  | 10 | 90332817 | 8 | 0.208331 |
| rs2296545      | C10orf59  | 10 | 90332817 | 3 | 0.522188 |
| rs2296545      | C10orf59  | 10 | 90332817 | 6 | 0.289699 |
| rs2296545      | C10orf59  | 10 | 90332817 | 5 | 0.327934 |
| rs1214464      | LIPK      | 10 | 90502286 | 7 | 0.488495 |

|                |          |    |          |   |          |
|----------------|----------|----|----------|---|----------|
| rs41284088     | LIPN     | 10 | 90514315 | 3 | 1.44444  |
| rs41284088     | LIPN     | 10 | 90514315 | 4 | 2.087478 |
| rs17382301     | CH25H    | 10 | 90956373 | 2 | 3.562461 |
| rs17382301     | CH25H    | 10 | 90956373 | 1 | 0.959157 |
| rs17382301     | CH25H    | 10 | 90956373 | 8 | 0.100226 |
| rs1131706      | LIPA     | 10 | 90963656 | 1 | 0.856337 |
| rs954439       | IFIT2    | 10 | 91056440 | 3 | 0.012059 |
| rs954439       | IFIT2    | 10 | 91056440 | 1 | 7.174821 |
| rs954439       | IFIT2    | 10 | 91056440 | 5 | 0.610752 |
| rs954439       | IFIT2    | 10 | 91056440 | 7 | 8.619853 |
| rs4934470      | IFIT2    | 10 | 91057418 | 8 | 1.950561 |
| rs4934470      | IFIT2    | 10 | 91057418 | 5 | 0.432132 |
| rs4934470      | IFIT2    | 10 | 91057418 | 3 | 0.155439 |
| rs4934470      | IFIT2    | 10 | 91057418 | 4 | 2.551354 |
| rs4934470      | IFIT2    | 10 | 91057418 | 6 | 0.425219 |
| rs4933504      | IFIT2    | 10 | 91057575 | 5 | 0.486492 |
| rs4933504      | IFIT2    | 10 | 91057575 | 3 | 0.373877 |
| rs4933504      | IFIT2    | 10 | 91057575 | 1 | 1.547329 |
| rs4933504      | IFIT2    | 10 | 91057575 | 8 | 4.781227 |
| rs4933504      | IFIT2    | 10 | 91057575 | 7 | 0.990989 |
| rs3780878      | IFIT3    | 10 | 91089610 | 7 | 0.05251  |
| rs3780878      | IFIT3    | 10 | 91089610 | 3 | 0.251077 |
| rs17119665     | IFIT3    | 10 | 91089637 | 8 | 0.608088 |
| rs10749607     | IFIT3    | 10 | 91089923 | 7 | 2.044706 |
| rs10749607     | IFIT3    | 10 | 91089923 | 3 | 0.214028 |
| rs304504       | IFIT1L   | 10 | 91127806 | 3 | 0.013518 |
| rs303210       | IFIT1    | 10 | 91152657 | 8 | 2.547069 |
| rs2296616      | PANK1    | 10 | 91342946 | 6 | 0.142019 |
| rs2296616      | PANK1    | 10 | 91342946 | 3 | 0.721565 |
| rs2296616      | PANK1    | 10 | 91342946 | 5 | 1.262906 |
| rs2296616      | PANK1    | 10 | 91342946 | 7 | 0.389603 |
| rs2296616      | PANK1    | 10 | 91342946 | 8 | 0.486356 |
| rs2296616      | PANK1    | 10 | 91342946 | 2 | 5.718439 |
| rs2296616      | PANK1    | 10 | 91342946 | 4 | 0.620887 |
| SNP10-91395024 | PANK1    | 10 | 91395024 | 5 | 0.519707 |
| rs3758383      | MPHOSPH1 | 10 | 91458905 | 7 | 4.689477 |
| rs12572012     | MPHOSPH1 | 10 | 91477629 | 7 | 0.465432 |
| rs1062465      | MPHOSPH1 | 10 | 91487611 | 3 | 0.375823 |
| rs1062465      | MPHOSPH1 | 10 | 91487611 | 4 | 0.853605 |
| rs1062465      | MPHOSPH1 | 10 | 91487611 | 5 | 5.751588 |
| rs1062465      | MPHOSPH1 | 10 | 91487611 | 1 | 0.396298 |
| rs1062465      | MPHOSPH1 | 10 | 91487611 | 2 | 3.922943 |
| rs1126480      | MPHOSPH1 | 10 | 91493640 | 2 | 0.217868 |
| rs1126480      | MPHOSPH1 | 10 | 91493640 | 3 | 0.24361  |
| rs1126480      | MPHOSPH1 | 10 | 91493640 | 5 | 0.103108 |
| rs1126480      | MPHOSPH1 | 10 | 91493640 | 4 | 0.033273 |
| rs1126480      | MPHOSPH1 | 10 | 91493640 | 1 | 0.27718  |

|            |             |    |          |   |          |
|------------|-------------|----|----------|---|----------|
| rs3740040  | hCG_2024094 | 10 | 91587406 | 1 | 1.436664 |
| rs3740040  | hCG_2024094 | 10 | 91587406 | 5 | 1.26707  |
| rs10881718 | LOC119358   | 10 | 91728735 | 6 | 1.914124 |
| rs10881718 | LOC119358   | 10 | 91728735 | 7 | 3.676837 |
| rs10881718 | LOC119358   | 10 | 91728735 | 3 | 3.69974  |
| rs1045949  | HTR7        | 10 | 92490704 | 3 | 1.736479 |
| rs1418213  | HTR7        | 10 | 92491630 | 6 | 4.598456 |
| rs3939     | ANKRD1      | 10 | 92662544 | 4 | 1.007637 |
| rs3939     | ANKRD1      | 10 | 92662544 | 1 | 0.002771 |
| rs3939     | ANKRD1      | 10 | 92662544 | 5 | 0.095405 |
| rs10881855 | ANKRD1      | 10 | 92670909 | 1 | 0.884105 |
| rs6583740  | LOC643599   | 10 | 92710906 | 4 | 0.23455  |
| rs6583740  | LOC643599   | 10 | 92710906 | 3 | 0.852908 |
| rs6583740  | LOC643599   | 10 | 92710906 | 1 | 0.984306 |
| rs6583740  | LOC643599   | 10 | 92710906 | 7 | 1.218723 |
| rs1044563  | PPP1R3C     | 10 | 93380129 | 3 | 1.57021  |
| rs1044563  | PPP1R3C     | 10 | 93380129 | 1 | 4.706492 |
| rs3758499  | TNKS2       | 10 | 93598122 | 1 | 2.237951 |
| rs3758499  | TNKS2       | 10 | 93598122 | 5 | 0.681286 |
| rs3758499  | TNKS2       | 10 | 93598122 | 7 | 1.829429 |
| rs3758499  | TNKS2       | 10 | 93598122 | 8 | 1.046567 |
| rs11186737 | FGFBP3      | 10 | 93656329 | 5 | 1.262787 |
| rs11186737 | FGFBP3      | 10 | 93656329 | 7 | 0.352653 |
| rs11186737 | FGFBP3      | 10 | 93656329 | 1 | 1.737182 |
| rs1107947  | FGFBP3      | 10 | 93658090 | 1 | 3.461692 |
| rs1107947  | FGFBP3      | 10 | 93658090 | 4 | 2.176484 |
| rs1107947  | FGFBP3      | 10 | 93658090 | 7 | 7.118555 |
| rs1107947  | FGFBP3      | 10 | 93658090 | 5 | 0.257144 |
| rs746842   | 5-Mar       | 10 | 94040968 | 3 | 0.06658  |
| rs746842   | 5-Mar       | 10 | 94040968 | 5 | 0.923492 |
| rs1057848  | 5-Mar       | 10 | 94102136 | 8 | 0.134169 |
| rs1057848  | 5-Mar       | 10 | 94102136 | 5 | 0.29196  |
| rs1057848  | 5-Mar       | 10 | 94102136 | 3 | 0.267137 |
| rs2209972  | LOC643768   | 10 | 94169008 | 2 | 0.585022 |
| rs2209972  | LOC643768   | 10 | 94169008 | 8 | 0.731193 |
| rs2209972  | LOC643768   | 10 | 94169008 | 1 | 1.089876 |
| rs2209972  | LOC643768   | 10 | 94169008 | 3 | 1.300823 |
| rs2490741  | EXOC6       | 10 | 94584545 | 3 | 0.070166 |
| rs11187225 | EXOC6       | 10 | 94704407 | 6 | 0.441771 |
| rs11187225 | EXOC6       | 10 | 94704407 | 7 | 5.439477 |
| rs7070947  | LOC387703   | 10 | 94957066 | 5 | 4.667833 |
| rs7070947  | LOC387703   | 10 | 94957066 | 4 | 2.77897  |
| rs7070947  | LOC387703   | 10 | 94957066 | 1 | 4.467407 |
| rs7070947  | LOC387703   | 10 | 94957066 | 8 | 3.300088 |
| rs7070947  | LOC387703   | 10 | 94957066 | 2 | 2.836952 |
| rs11187393 | FER1L3      | 10 | 95097418 | 4 | 1.584569 |
| rs11187393 | FER1L3      | 10 | 95097418 | 1 | 4.938193 |



|                |           |    |          |   |          |
|----------------|-----------|----|----------|---|----------|
| SNP10-95151258 | FER1L3    | 10 | 95151258 | 8 | 4.593122 |
| rs12262721     | FER1L3    | 10 | 95153799 | 2 | 9.474972 |
| rs3740370      | CEP55     | 10 | 95249969 | 1 | 6.297589 |
| rs3740370      | CEP55     | 10 | 95249969 | 7 | 0.124319 |
| rs3740370      | CEP55     | 10 | 95249969 | 5 | 0.1168   |
| rs12781149     | PDE6C     | 10 | 95362754 | 6 | 1.485076 |
| rs714550       | PDE6C     | 10 | 95379031 | 1 | 1.298259 |
| rs714550       | PDE6C     | 10 | 95379031 | 7 | 2.06185  |
| rs714550       | PDE6C     | 10 | 95379031 | 4 | 2.063571 |
| rs714550       | PDE6C     | 10 | 95379031 | 2 | 2.915796 |
| rs2275438      | C10orf4   | 10 | 95444671 | 7 | 0.545434 |
| rs2275438      | C10orf4   | 10 | 95444671 | 5 | 0.122414 |
| rs12768993     | PIPSL     | 10 | 95708027 | 5 | 0.132075 |
| rs10882386     | PLCE1     | 10 | 95780659 | 5 | 0.564315 |
| rs17517313     | PLCE1     | 10 | 96077718 | 1 | 2.421548 |
| rs12572897     | NOC3L     | 10 | 96104825 | 3 | 1.510171 |
| SNP10-96285436 | TBC1D12   | 10 | 96285436 | 8 | 5.050084 |
| rs1042192      | CYP2C18   | 10 | 96485274 | 3 | 0.046893 |
| rs4244285      | CYP2C19   | 10 | 96531606 | 3 | 0.159128 |
| VG10S3890      | CYP2C9    | 10 | 96731043 | 3 | 0.123422 |
| rs1057911      | CYP2C9    | 10 | 96738727 | 3 | 1.925063 |
| rs9332242      | CYP2C9    | 10 | 96738883 | 7 | 0.396797 |
| rs9332242      | CYP2C9    | 10 | 96738883 | 5 | 0.397424 |
| rs9332242      | CYP2C9    | 10 | 96738883 | 2 | 0.524289 |
| rs1058932      | CYP2C8    | 10 | 96786851 | 4 | 2.793628 |
| rs1058932      | CYP2C8    | 10 | 96786851 | 3 | 0.537157 |
| rs10509681     | CYP2C8    | 10 | 96788739 | 2 | 4.715539 |
| rs10509681     | CYP2C8    | 10 | 96788739 | 7 | 1.115927 |
| rs10509681     | CYP2C8    | 10 | 96788739 | 5 | 0.134793 |
| rs1058930      | CYP2C8    | 10 | 96808109 | 4 | 5.013978 |
| rs591157       | C10orf129 | 10 | 96944288 | 5 | 1.096052 |
| rs591157       | C10orf129 | 10 | 96944288 | 3 | 1.38595  |
| rs591157       | C10orf129 | 10 | 96944288 | 1 | 1.095751 |
| rs11188225     | C10orf129 | 10 | 96944350 | 3 | 0.267171 |
| rs689207       | C10orf129 | 10 | 96975533 | 3 | 0.535494 |
| rs689207       | C10orf129 | 10 | 96975533 | 1 | 1.56743  |
| rs688706       | C10orf129 | 10 | 96975691 | 3 | 0.084624 |
| rs688706       | C10orf129 | 10 | 96975691 | 1 | 0.041049 |
| rs1132810      | SORBS1    | 10 | 97061739 | 2 | 4.022068 |
| rs9313         | SORBS1    | 10 | 97061862 | 2 | 3.616979 |
| rs2281939      | SORBS1    | 10 | 97164342 | 8 | 0.538236 |
| rs10509698     | CC2D2B    | 10 | 97782342 | 3 | 0.381745 |
| SNP10-97909001 | ZNF518A   | 10 | 97909001 | 1 | 0.088429 |
| SNP10-97909001 | ZNF518A   | 10 | 97909001 | 3 | 0.172941 |
| SNP10-97909001 | ZNF518A   | 10 | 97909001 | 2 | 4.949771 |
| rs4917734      | TLL2      | 10 | 98115387 | 2 | 0.09931  |
| rs4917734      | TLL2      | 10 | 98115387 | 4 | 0.188612 |

|                |           |    |           |   |          |
|----------------|-----------|----|-----------|---|----------|
| rs4917734      | TLL2      | 10 | 98115387  | 6 | 0.394767 |
| rs3814221      | TLL2      | 10 | 98117580  | 7 | 0.450434 |
| rs7448         | PIK3AP1   | 10 | 98343203  | 3 | 0.452552 |
| rs7448         | PIK3AP1   | 10 | 98343203  | 7 | 0.417353 |
| rs7448         | PIK3AP1   | 10 | 98343203  | 2 | 1.324336 |
| SNP10-98370127 | PIK3AP1   | 10 | 98370127  | 1 | 3.611142 |
| SNP10-98370127 | PIK3AP1   | 10 | 98370127  | 7 | 0.088245 |
| SNP10-98370127 | PIK3AP1   | 10 | 98370127  | 6 | 1.770521 |
| rs3748229      | PIK3AP1   | 10 | 98459497  | 4 | 0.299803 |
| rs3748229      | PIK3AP1   | 10 | 98459497  | 7 | 0.122429 |
| rs3748229      | PIK3AP1   | 10 | 98459497  | 6 | 2.234466 |
| rs3748229      | PIK3AP1   | 10 | 98459497  | 3 | 0.805484 |
| rs17112076     | PIK3AP1   | 10 | 98459683  | 5 | 0.433768 |
| rs7098255      | C10orf12  | 10 | 98732011  | 1 | 3.850732 |
| rs7098255      | C10orf12  | 10 | 98732011  | 8 | 0.41835  |
| rs3814163      | C10orf12  | 10 | 98732595  | 1 | 5.552813 |
| rs12572241     | ARHGAP19  | 10 | 98975602  | 7 | 0.749961 |
| rs13439        | ARHGAP19  | 10 | 98996073  | 7 | 0.400424 |
| rs13439        | ARHGAP19  | 10 | 98996073  | 5 | 0.399876 |
| rs13439        | ARHGAP19  | 10 | 98996073  | 3 | 0.277474 |
| rs928603       | LOC644215 | 10 | 99173392  | 1 | 0.60481  |
| rs928603       | LOC644215 | 10 | 99173392  | 2 | 1.063111 |
| rs928603       | LOC644215 | 10 | 99173392  | 3 | 0.727887 |
| rs928603       | LOC644215 | 10 | 99173392  | 6 | 3.316973 |
| rs928603       | LOC644215 | 10 | 99173392  | 4 | 0.019637 |
| rs4919098      | EXOSC1    | 10 | 99195721  | 7 | 0.637315 |
| rs4919098      | EXOSC1    | 10 | 99195721  | 3 | 1.126788 |
| rs7094973      | ANKRD2    | 10 | 99327562  | 6 | 4.397575 |
| rs7093643      | C10orf62  | 10 | 99340118  | 2 | 2.278769 |
| rs7093643      | C10orf62  | 10 | 99340118  | 7 | 1.753744 |
| rs7093643      | C10orf62  | 10 | 99340118  | 1 | 4.867271 |
| rs7093643      | C10orf62  | 10 | 99340118  | 5 | 0.440108 |
| rs933057       | C10orf65  | 10 | 99361719  | 7 | 2.011873 |
| rs933057       | C10orf65  | 10 | 99361719  | 4 | 1.449894 |
| rs1977640      | C10orf65  | 10 | 99362043  | 7 | 1.198386 |
| rs1977640      | C10orf65  | 10 | 99362043  | 4 | 0.015815 |
| rs3814556      | C10orf83  | 10 | 99366142  | 7 | 0.652773 |
| SNP10-99383224 | C10orf83  | 10 | 99383224  | 7 | 1.360948 |
| rs2039826      | SFRP5     | 10 | 99516658  | 3 | 1.653141 |
| rs2039826      | SFRP5     | 10 | 99516658  | 7 | 1.121528 |
| SNP10-99959465 | C10orf28  | 10 | 99959465  | 3 | 0.125507 |
| SNP10-99959465 | C10orf28  | 10 | 99959465  | 5 | 1.058097 |
| SNP10-99959465 | C10orf28  | 10 | 99959465  | 4 | 0.667709 |
| rs4345897      | C10orf33  | 10 | 100137050 | 5 | 3.843261 |
| rs4345897      | C10orf33  | 10 | 100137050 | 3 | 0.102964 |
| rs4345897      | C10orf33  | 10 | 100137050 | 8 | 5.056016 |
| rs12763326     | C10orf33  | 10 | 100157386 | 3 | 1.269903 |

|                |          |    |           |   |          |
|----------------|----------|----|-----------|---|----------|
| rs12763326     | C10orf33 | 10 | 100157386 | 1 | 3.798969 |
| rs1061437      | HPS1     | 10 | 100166144 | 8 | 0.844612 |
| rs1061437      | HPS1     | 10 | 100166144 | 3 | 0.044248 |
| rs1061437      | HPS1     | 10 | 100166144 | 1 | 5.070756 |
| rs3830020      | HPS1     | 10 | 100166605 | 3 | 0.296864 |
| rs3830019      | HPS1     | 10 | 100166838 | 1 | 4.339053 |
| rs10883099     | HPSE2    | 10 | 100209304 | 2 | 1.746312 |
| rs10883099     | HPSE2    | 10 | 100209304 | 4 | 1.358498 |
| rs10883099     | HPSE2    | 10 | 100209304 | 8 | 1.118569 |
| rs10883099     | HPSE2    | 10 | 100209304 | 1 | 1.782955 |
| rs10883099     | HPSE2    | 10 | 100209304 | 6 | 0.641478 |
| rs10883100     | HPSE2    | 10 | 100209364 | 6 | 0.287205 |
| rs10883100     | HPSE2    | 10 | 100209364 | 1 | 1.243293 |
| rs10883100     | HPSE2    | 10 | 100209364 | 2 | 1.262502 |
| rs10883100     | HPSE2    | 10 | 100209364 | 4 | 0.642832 |
| rs2862600      | CNNM1    | 10 | 101080418 | 1 | 0.536978 |
| SNP10-10113768 | CNNM1    | 10 | 101137682 | 1 | 5.123082 |
| SNP10-10113768 | CNNM1    | 10 | 101137682 | 7 | 0.626804 |
| rs2641         | GOT1     | 10 | 101146749 | 5 | 5.039377 |
| rs11867        | GOT1     | 10 | 101147150 | 5 | 0.953171 |
| rs2234971      | GOT1     | 10 | 101156534 | 3 | 0.279014 |
| rs11190245     | ENTPD7   | 10 | 101441249 | 7 | 0.460496 |
| rs11190245     | ENTPD7   | 10 | 101441249 | 4 | 3.713639 |
| rs11190245     | ENTPD7   | 10 | 101441249 | 8 | 1.139277 |
| rs2231687      | COX15    | 10 | 101463208 | 1 | 5.168186 |
| rs717620       | ABCC2    | 10 | 101532568 | 1 | 2.520728 |
| rs2273697      | ABCC2    | 10 | 101553805 | 6 | 2.57831  |
| rs2273697      | ABCC2    | 10 | 101553805 | 7 | 0.885591 |
| rs2273697      | ABCC2    | 10 | 101553805 | 4 | 0.091339 |
| rs2273697      | ABCC2    | 10 | 101553805 | 2 | 3.972447 |
| rs2273697      | ABCC2    | 10 | 101553805 | 8 | 0.071762 |
| rs1137968      | ABCC2    | 10 | 101596851 | 2 | 4.655564 |
| rs8187707      | ABCC2    | 10 | 101600523 | 2 | 6.057557 |
| SNP10-10165780 | DNMBP    | 10 | 101657804 | 5 | 0.765662 |
| SNP10-10170610 | DNMBP    | 10 | 101706102 | 6 | 7.862457 |
| rs2270962      | CWF19L1  | 10 | 102006034 | 3 | 0.478607 |
| rs12784396     | CWF19L1  | 10 | 102017397 | 7 | 1.250459 |
| rs12784396     | CWF19L1  | 10 | 102017397 | 3 | 1.431816 |
| rs11557934     | SCD      | 10 | 102112702 | 5 | 1.602756 |
| rs11557934     | SCD      | 10 | 102112702 | 1 | 2.405097 |
| rs3793772      | WNT8B    | 10 | 102212815 | 3 | 0.757035 |
| rs3793772      | WNT8B    | 10 | 102212815 | 6 | 0.424245 |
| rs3793772      | WNT8B    | 10 | 102212815 | 5 | 2.865299 |
| rs3793771      | WNT8B    | 10 | 102212947 | 3 | 1.100338 |
| rs3793771      | WNT8B    | 10 | 102212947 | 5 | 0.361329 |
| rs11190581     | WNT8B    | 10 | 102233377 | 7 | 0.908357 |
| rs11190581     | WNT8B    | 10 | 102233377 | 6 | 0.283027 |

|            |         |    |           |   |          |
|------------|---------|----|-----------|---|----------|
| rs11190581 | WNT8B   | 10 | 102233377 | 5 | 1.39175  |
| rs11190581 | WNT8B   | 10 | 102233377 | 3 | 0.93357  |
| rs2298075  | SEC31B  | 10 | 102237398 | 3 | 0.904856 |
| rs2298075  | SEC31B  | 10 | 102237398 | 5 | 0.100303 |
| rs2298075  | SEC31B  | 10 | 102237398 | 6 | 2.756122 |
| rs2298075  | SEC31B  | 10 | 102237398 | 7 | 0.287316 |
| rs41290542 | SEC31B  | 10 | 102248981 | 7 | 0.814232 |
| rs3793706  | SEC31B  | 10 | 102259075 | 3 | 1.604394 |
| rs3793706  | SEC31B  | 10 | 102259075 | 5 | 0.880601 |
| rs3763695  | SEC31B  | 10 | 102259196 | 6 | 0.280271 |
| rs3763695  | SEC31B  | 10 | 102259196 | 3 | 0.323136 |
| rs3763695  | SEC31B  | 10 | 102259196 | 5 | 0.141294 |
| rs3763695  | SEC31B  | 10 | 102259196 | 7 | 0.097858 |
| rs1800898  | PAX2    | 10 | 102558973 | 7 | 2.313592 |
| rs1800898  | PAX2    | 10 | 102558973 | 2 | 1.868646 |
| rs1800898  | PAX2    | 10 | 102558973 | 6 | 2.607718 |
| rs1800898  | PAX2    | 10 | 102558973 | 4 | 1.450364 |
| rs12098288 | PAX2    | 10 | 102577564 | 6 | 2.049003 |
| rs927302   | C10orf6 | 10 | 102712906 | 2 | 7.157846 |
| rs927302   | C10orf6 | 10 | 102712906 | 1 | 0.696315 |
| GA009036   | C10orf2 | 10 | 102743778 | 3 | 0.064084 |
| GA009036   | C10orf2 | 10 | 102743778 | 8 | 2.743096 |
| GA009036   | C10orf2 | 10 | 102743778 | 6 | 0.934741 |
| rs3740488  | C10orf2 | 10 | 102744023 | 2 | 3.426668 |
| rs3740488  | C10orf2 | 10 | 102744023 | 1 | 0.291229 |
| rs752974   | LZTS2   | 10 | 102752246 | 1 | 1.96189  |
| rs752974   | LZTS2   | 10 | 102752246 | 4 | 0.109154 |
| rs701836   | LZTS2   | 10 | 102757107 | 2 | 0.799249 |
| rs701836   | LZTS2   | 10 | 102757107 | 1 | 0.04064  |
| rs701836   | LZTS2   | 10 | 102757107 | 4 | 0.319424 |
| rs14177    | LZTS2   | 10 | 102757145 | 1 | 0.243985 |
| rs14177    | LZTS2   | 10 | 102757145 | 4 | 0.620658 |
| rs807023   | NULL    | 10 | 102760072 | 2 | 4.917305 |
| GA027197   | KAZALD1 | 10 | 102814339 | 4 | 1.034296 |
| GA027197   | KAZALD1 | 10 | 102814339 | 5 | 1.506701 |
| rs807037   | KAZALD1 | 10 | 102814339 | 4 | 8.614371 |
| rs807037   | KAZALD1 | 10 | 102814339 | 2 | 5.820859 |
| rs807037   | KAZALD1 | 10 | 102814339 | 5 | 5.361336 |
| rs12359843 | KAZALD1 | 10 | 102814750 | 5 | 4.997954 |
| rs17113735 | TLX1    | 10 | 102886839 | 1 | 0.976869 |
| rs1051723  | TLX1    | 10 | 102887047 | 4 | 1.428338 |
| rs4919551  | BTRC    | 10 | 103303536 | 7 | 0.770061 |
| rs4919552  | BTRC    | 10 | 103305168 | 7 | 0.512883 |
| rs10883689 | KCNIP2  | 10 | 103576346 | 2 | 1.937287 |
| rs10883689 | KCNIP2  | 10 | 103576346 | 6 | 0.093171 |
| rs10883689 | KCNIP2  | 10 | 103576346 | 7 | 0.550435 |
| rs10883689 | KCNIP2  | 10 | 103576346 | 4 | 0.752765 |

|            |          |    |           |   |          |
|------------|----------|----|-----------|---|----------|
| rs11596387 | C10orf76 | 10 | 103596112 | 4 | 0.108702 |
| rs3737243  | HPS6     | 10 | 103815737 | 4 | 0.002869 |
| rs3737243  | HPS6     | 10 | 103815737 | 6 | 0.512744 |
| rs3737243  | HPS6     | 10 | 103815737 | 2 | 2.739481 |
| rs11191274 | GBF1     | 10 | 104130340 | 1 | 4.154084 |
| rs1057050  | GBF1     | 10 | 104132284 | 5 | 7.930473 |
| rs11574851 | NFKB2    | 10 | 104150949 | 8 | 1.404136 |
| rs2282295  | PSD      | 10 | 104164885 | 1 | 2.926664 |
| rs11191295 | TMEM180  | 10 | 104221044 | 2 | 3.635098 |
| rs11191295 | TMEM180  | 10 | 104221044 | 1 | 0.781738 |
| rs1056744  | TMEM180  | 10 | 104226677 | 1 | 0.56027  |
| rs1056744  | TMEM180  | 10 | 104226677 | 2 | 0.851068 |
| rs17114808 | SUFU     | 10 | 104381275 | 1 | 5.807912 |
| rs12573077 | ARL3     | 10 | 104424620 | 6 | 0.140575 |
| rs12573077 | ARL3     | 10 | 104424620 | 8 | 3.927767 |
| rs6163     | CYP17A1  | 10 | 104586914 | 1 | 1.713482 |
| rs743572   | CYP17A1  | 10 | 104587142 | 1 | 0.635169 |
| rs943037   | CNNM2    | 10 | 104825909 | 1 | 3.468187 |
| rs2296568  | CNNM2    | 10 | 104826930 | 8 | 4.095263 |
| rs12573199 | NT5C2    | 10 | 104838834 | 2 | 1.233159 |
| rs1163236  | NT5C2    | 10 | 104942997 | 2 | 3.628722 |
| rs1063461  | INA      | 10 | 105039095 | 7 | 0.627558 |
| rs1063461  | INA      | 10 | 105039095 | 6 | 0.223371 |
| rs2986014  | PDCD11   | 10 | 105184076 | 4 | 0.740373 |
| rs11191692 | FAM26C   | 10 | 105203755 | 7 | 0.624112 |
| rs11191692 | FAM26C   | 10 | 105203755 | 4 | 1.705531 |
| rs11191692 | FAM26C   | 10 | 105203755 | 1 | 1.099883 |
| rs11191692 | FAM26C   | 10 | 105203755 | 2 | 0.137877 |
| rs11191692 | FAM26C   | 10 | 105203755 | 6 | 0.989832 |
| rs2986016  | FAM26C   | 10 | 105205006 | 6 | 1.534605 |
| rs7918186  | NEURL    | 10 | 105340437 | 5 | 3.163869 |
| rs7918186  | NEURL    | 10 | 105340437 | 4 | 0.520802 |
| rs41287516 | SH3PXD2A | 10 | 105362913 | 3 | 1.083602 |
| rs10786775 | OBFC1    | 10 | 105647306 | 2 | 0.257051 |
| rs10786775 | OBFC1    | 10 | 105647306 | 1 | 0.553486 |
| rs10786775 | OBFC1    | 10 | 105647306 | 3 | 0.690163 |
| rs2274100  | COL17A1  | 10 | 105788862 | 8 | 0.644659 |
| rs2274100  | COL17A1  | 10 | 105788862 | 1 | 3.431923 |
| rs2296219  | COL17A1  | 10 | 105789206 | 1 | 3.156043 |
| rs2296219  | COL17A1  | 10 | 105789206 | 8 | 1.495852 |
| rs2296219  | COL17A1  | 10 | 105789206 | 4 | 1.190581 |
| rs4918079  | COL17A1  | 10 | 105791243 | 4 | 1.531865 |
| rs4918079  | COL17A1  | 10 | 105791243 | 8 | 3.438286 |
| rs4918079  | COL17A1  | 10 | 105791243 | 1 | 1.881884 |
| rs805722   | COL17A1  | 10 | 105800390 | 3 | 0.266719 |
| rs805722   | COL17A1  | 10 | 105800390 | 8 | 0.904988 |
| rs805722   | COL17A1  | 10 | 105800390 | 4 | 1.047247 |

|            |           |    |           |   |          |
|------------|-----------|----|-----------|---|----------|
| rs17750886 | C10orf79  | 10 | 105917450 | 4 | 0.132391 |
| rs17750886 | C10orf79  | 10 | 105917450 | 3 | 1.145593 |
| rs17750886 | C10orf79  | 10 | 105917450 | 8 | 2.981967 |
| rs505701   | KIAA1754  | 10 | 106063556 | 4 | 6.300952 |
| rs17754543 | KIAA1754  | 10 | 106083473 | 4 | 0.316886 |
| rs17754543 | KIAA1754  | 10 | 106083473 | 8 | 2.163329 |
| rs3750261  | SORCS3    | 10 | 107013380 | 5 | 0.615138 |
| rs3750261  | SORCS3    | 10 | 107013380 | 3 | 0.670077 |
| rs874241   | RBM20     | 10 | 112586560 | 5 | 3.439571 |
| rs874241   | RBM20     | 10 | 112586560 | 1 | 2.207697 |
| rs7081726  | PDCD4     | 10 | 112631043 | 7 | 6.118694 |
| rs11195419 | ADRA2A    | 10 | 112829358 | 7 | 0.390972 |
| rs13306146 | ADRA2A    | 10 | 112830161 | 7 | 1.667874 |
| rs1129555  | GPAM      | 10 | 113900711 | 1 | 3.671683 |
| rs1129555  | GPAM      | 10 | 113900711 | 7 | 0.59789  |
| rs1129555  | GPAM      | 10 | 113900711 | 3 | 0.11246  |
| rs2254537  | GPAM      | 10 | 113907075 | 7 | 4.186681 |
| rs2254537  | GPAM      | 10 | 113907075 | 3 | 0.223477 |
| rs2254537  | GPAM      | 10 | 113907075 | 1 | 5.080107 |
| rs10787428 | GPAM      | 10 | 113925369 | 7 | 1.107417 |
| rs10787428 | GPAM      | 10 | 113925369 | 1 | 5.528226 |
| rs10787428 | GPAM      | 10 | 113925369 | 3 | 0.635892 |
| rs2792751  | GPAM      | 10 | 113930319 | 1 | 5.654753 |
| rs2290965  | ZDHHC6    | 10 | 114180342 | 4 | 5.056522 |
| rs2290965  | ZDHHC6    | 10 | 114180342 | 7 | 8.21628  |
| rs3740530  | HABP2     | 10 | 115324114 | 2 | 0.082712 |
| rs2245056  | HABP2     | 10 | 115331743 | 8 | 1.855334 |
| rs3832698  | NRAP      | 10 | 115338717 | 8 | 0.508787 |
| rs3127106  | NRAP      | 10 | 115395605 | 6 | 1.353907 |
| rs3127106  | NRAP      | 10 | 115395605 | 7 | 0.525121 |
| rs3127106  | NRAP      | 10 | 115395605 | 2 | 0.704163 |
| rs3121478  | NRAP      | 10 | 115395654 | 6 | 1.252367 |
| rs3121478  | NRAP      | 10 | 115395654 | 7 | 1.867333 |
| rs3121478  | NRAP      | 10 | 115395654 | 2 | 2.20891  |
| rs2154028  | NRAP      | 10 | 115401604 | 2 | 1.741747 |
| rs2227310  | CASP7     | 10 | 115479142 | 7 | 0.802084 |
| rs2227310  | CASP7     | 10 | 115479142 | 5 | 1.35689  |
| rs2227310  | CASP7     | 10 | 115479142 | 3 | 0.193282 |
| rs10567    | DCLRE1A   | 10 | 115584715 | 5 | 2.592142 |
| rs7095762  | C10orf118 | 10 | 115900918 | 1 | 5.525638 |
| rs7095762  | C10orf118 | 10 | 115900918 | 8 | 4.824356 |
| rs1061159  | C10orf118 | 10 | 115912764 | 8 | 8.766489 |
| rs1061159  | C10orf118 | 10 | 115912764 | 1 | 5.441538 |
| rs12266538 | TDRD1     | 10 | 115981735 | 6 | 0.774661 |
| rs9664945  | VWA2      | 10 | 115998487 | 1 | 3.253517 |
| rs7350409  | AFAP1L2   | 10 | 116044575 | 1 | 4.207278 |
| rs2781806  | AFAP1L2   | 10 | 116050417 | 2 | 5.35481  |

|            |               |    |           |   |          |
|------------|---------------|----|-----------|---|----------|
| rs621375   | AFAP1L2       | 10 | 116063791 | 3 | 0.72405  |
| rs621375   | AFAP1L2       | 10 | 116063791 | 5 | 0.510443 |
| rs6646     | ABLIM1        | 10 | 116181164 | 4 | 0.218664 |
| rs6646     | ABLIM1        | 10 | 116181164 | 6 | 0.969984 |
| rs3802734  | ABLIM1        | 10 | 116184200 | 2 | 3.49081  |
| rs3802734  | ABLIM1        | 10 | 116184200 | 4 | 0.91516  |
| rs3802734  | ABLIM1        | 10 | 116184200 | 8 | 4.949328 |
| rs1061413  | GFRA1         | 10 | 117812953 | 1 | 1.76865  |
| rs2072277  | GFRA1         | 10 | 117813194 | 2 | 6.401078 |
| rs1078080  | GFRA1         | 10 | 117813729 | 1 | 0.526047 |
| rs2245020  | GFRA1         | 10 | 117874940 | 7 | 1.388664 |
| rs2245020  | GFRA1         | 10 | 117874940 | 1 | 0.848369 |
| rs2245020  | GFRA1         | 10 | 117874940 | 6 | 2.754101 |
| rs2245020  | GFRA1         | 10 | 117874940 | 2 | 7.915876 |
| rs10787669 | PNLIPRP3      | 10 | 118177389 | 5 | 0.524116 |
| rs11544712 | PNLIPRP2      | 10 | 118377272 | 3 | 1.158584 |
| rs2301179  | PNLIPRP2      | 10 | 118394610 | 3 | 0.492757 |
| rs2301179  | PNLIPRP2      | 10 | 118394610 | 6 | 1.264777 |
| rs2301179  | PNLIPRP2      | 10 | 118394610 | 2 | 2.508899 |
| rs2301179  | PNLIPRP2      | 10 | 118394610 | 4 | 1.316778 |
| rs17095095 | HSPA12A       | 10 | 118421287 | 6 | 1.236751 |
| rs17095095 | HSPA12A       | 10 | 118421287 | 4 | 0.753897 |
| rs17095095 | HSPA12A       | 10 | 118421287 | 3 | 0.138758 |
| rs17095095 | HSPA12A       | 10 | 118421287 | 1 | 4.699339 |
| rs11197793 | HSPA12A       | 10 | 118425979 | 5 | 0.247516 |
| rs7083543  | DKFZp781N1041 | 10 | 118606100 | 8 | 0.95339  |
| rs7083543  | DKFZp781N1041 | 10 | 118606100 | 2 | 0.547062 |
| rs11197835 | DKFZp781N1041 | 10 | 118610449 | 4 | 0.157316 |
| rs11197835 | DKFZp781N1041 | 10 | 118610449 | 7 | 0.228794 |
| rs3814230  | PDZD8         | 10 | 119123958 | 4 | 0.212191 |
| rs3814230  | PDZD8         | 10 | 119123958 | 6 | 0.409455 |
| rs3814230  | PDZD8         | 10 | 119123958 | 3 | 0.149816 |
| rs2768327  | EMX2OS        | 10 | 119237657 | 1 | 1.776551 |
| rs242965   | EMX2OS        | 10 | 119240201 | 1 | 1.106307 |
| rs242964   | EMX2OS        | 10 | 119240373 | 5 | 0.066541 |
| rs1369     | CASC2         | 10 | 119957233 | 5 | 0.403957 |
| rs1369     | CASC2         | 10 | 119957233 | 1 | 4.062564 |
| rs703434   | C10orf84      | 10 | 120059107 | 5 | 0.080418 |
| rs7899785  | LOC729666     | 10 | 120682761 | 7 | 3.451338 |
| rs10749291 | SFXN4         | 10 | 120910578 | 7 | 1.803483 |
| rs10749291 | SFXN4         | 10 | 120910578 | 1 | 4.097441 |
| rs10749291 | SFXN4         | 10 | 120910578 | 4 | 2.209666 |
| rs11199005 | RGS10         | 10 | 121286019 | 7 | 1.9908   |
| rs11199005 | RGS10         | 10 | 121286019 | 2 | 0.728764 |
| rs11199005 | RGS10         | 10 | 121286019 | 1 | 1.060068 |
| rs11199005 | RGS10         | 10 | 121286019 | 6 | 1.424004 |
| rs7919868  | TIAL1         | 10 | 121346372 | 3 | 1.66717  |

|            |           |    |           |   |          |
|------------|-----------|----|-----------|---|----------|
| rs7919868  | TIAL1     | 10 | 121346372 | 1 | 1.976263 |
| rs7919868  | TIAL1     | 10 | 121346372 | 6 | 0.179503 |
| rs11199065 | BAG3      | 10 | 121427319 | 7 | 1.764863 |
| rs11199065 | BAG3      | 10 | 121427319 | 1 | 3.998759 |
| rs2901257  | C10orf85  | 10 | 122348453 | 8 | 5.066378 |
| rs2901257  | C10orf85  | 10 | 122348453 | 3 | 0.430412 |
| rs35350755 | ATE1      | 10 | 123539681 | 6 | 3.407081 |
| rs35350755 | ATE1      | 10 | 123539681 | 8 | 0.839979 |
| rs35350755 | ATE1      | 10 | 123539681 | 1 | 4.306954 |
| rs35350755 | ATE1      | 10 | 123539681 | 3 | 0.93682  |
| rs11200385 | TACC2     | 10 | 123832513 | 3 | 0.192268 |
| rs11200385 | TACC2     | 10 | 123832513 | 6 | 0.491585 |
| rs4752642  | TACC2     | 10 | 123836278 | 8 | 1.940363 |
| rs4752642  | TACC2     | 10 | 123836278 | 3 | 0.50686  |
| rs4752642  | TACC2     | 10 | 123836278 | 2 | 2.716678 |
| rs4752642  | TACC2     | 10 | 123836278 | 6 | 0.479746 |
| rs4751871  | TACC2     | 10 | 123836475 | 3 | 0.070388 |
| rs4751871  | TACC2     | 10 | 123836475 | 6 | 0.280995 |
| rs7100442  | BTBD16    | 10 | 124056721 | 4 | 1.303117 |
| rs2421013  | BTBD16    | 10 | 124079026 | 7 | 0.488407 |
| rs2421013  | BTBD16    | 10 | 124079026 | 4 | 1.938709 |
| rs2421013  | BTBD16    | 10 | 124079026 | 1 | 3.716661 |
| rs2421013  | BTBD16    | 10 | 124079026 | 3 | 0.36638  |
| rs3817281  | BTBD16    | 10 | 124086025 | 1 | 0.580261 |
| rs3817281  | BTBD16    | 10 | 124086025 | 4 | 0.285009 |
| rs3817281  | BTBD16    | 10 | 124086025 | 3 | 1.378092 |
| rs11523871 | DMBT1     | 10 | 124319700 | 8 | 3.254501 |
| rs11523871 | DMBT1     | 10 | 124319700 | 1 | 1.823238 |
| rs11523871 | DMBT1     | 10 | 124319700 | 6 | 2.107878 |
| rs11523871 | DMBT1     | 10 | 124319700 | 2 | 0.998725 |
| rs11523871 | DMBT1     | 10 | 124319700 | 3 | 1.422671 |
| rs11523871 | DMBT1     | 10 | 124319700 | 7 | 2.597405 |
| rs11248317 | LOC729800 | 10 | 124575823 | 2 | 1.29913  |
| rs11248317 | LOC729800 | 10 | 124575823 | 1 | 1.246802 |
| rs36212407 | CUZD1     | 10 | 124595656 | 6 | 0.994173 |
| rs36212407 | CUZD1     | 10 | 124595656 | 8 | 0.841935 |
| rs36212407 | CUZD1     | 10 | 124595656 | 7 | 0.804992 |
| rs36212407 | CUZD1     | 10 | 124595656 | 5 | 0.709643 |
| rs10902838 | LOC399815 | 10 | 124638140 | 1 | 5.911601 |
| rs10902838 | LOC399815 | 10 | 124638140 | 5 | 0.274438 |
| rs10902838 | LOC399815 | 10 | 124638140 | 4 | 0.640844 |
| rs10902838 | LOC399815 | 10 | 124638140 | 8 | 0.032486 |
| rs10902838 | LOC399815 | 10 | 124638140 | 7 | 6.751032 |
| rs10902838 | LOC399815 | 10 | 124638140 | 3 | 1.214173 |
| rs2293436  | FAM24A    | 10 | 124660288 | 4 | 0.074818 |
| rs3736582  | PSTK      | 10 | 124732885 | 1 | 3.67981  |
| rs3736582  | PSTK      | 10 | 124732885 | 4 | 4.450808 |



|                |           |    |           |   |          |
|----------------|-----------|----|-----------|---|----------|
| rs3736582      | PSTK      | 10 | 124732885 | 5 | 0.765449 |
| rs12263012     | ACADSB    | 10 | 124758573 | 1 | 2.083692 |
| rs12263012     | ACADSB    | 10 | 124758573 | 7 | 1.131449 |
| SNP10-12479676 | ACADSB    | 10 | 124796760 | 4 | 0.394713 |
| rs11248371     | ACADSB    | 10 | 124804471 | 5 | 0.030432 |
| rs11248371     | ACADSB    | 10 | 124804471 | 2 | 5.98311  |
| rs6838         | ACADSB    | 10 | 124807738 | 5 | 0.077192 |
| rs6838         | ACADSB    | 10 | 124807738 | 4 | 0.457892 |
| rs11248409     | HMX3      | 10 | 124884159 | 1 | 1.663572 |
| rs7897156      | BUB3      | 10 | 124903986 | 3 | 0.634893 |
| rs7095154      | BUB3      | 10 | 124914392 | 3 | 0.238259 |
| rs17608415     | GPR26     | 10 | 125441603 | 5 | 0.996595 |
| rs8277         | CPXM2     | 10 | 125495391 | 1 | 0.648687 |
| rs10794566     | CPXM2     | 10 | 125511523 | 8 | 0.983211 |
| rs10751601     | FAM53B    | 10 | 126299438 | 3 | 0.538687 |
| rs10751601     | FAM53B    | 10 | 126299438 | 1 | 2.762642 |
| rs10751601     | FAM53B    | 10 | 126299438 | 7 | 0.229889 |
| rs3740536      | FAM53B    | 10 | 126301485 | 7 | 0.316488 |
| rs2946994      | CTBP2     | 10 | 126704704 | 4 | 4.832959 |
| rs2946994      | CTBP2     | 10 | 126704704 | 1 | 0.254901 |
| rs2946994      | CTBP2     | 10 | 126704704 | 2 | 6.391717 |
| rs2946994      | CTBP2     | 10 | 126704704 | 6 | 0.133928 |
| rs2946994      | CTBP2     | 10 | 126704704 | 8 | 4.712567 |
| rs2946994      | CTBP2     | 10 | 126704704 | 5 | 2.431553 |
| rs3012075      | CTBP2     | 10 | 126704956 | 6 | 0.010224 |
| rs3012075      | CTBP2     | 10 | 126704956 | 2 | 0.649748 |
| rs3012075      | CTBP2     | 10 | 126704956 | 5 | 0.064129 |
| rs3012075      | CTBP2     | 10 | 126704956 | 8 | 1.447157 |
| rs3012075      | CTBP2     | 10 | 126704956 | 1 | 0.162953 |
| rs3781413      | CTBP2     | 10 | 126705065 | 3 | 0.328478 |
| rs3781413      | CTBP2     | 10 | 126705065 | 5 | 0.273213 |
| rs3781413      | CTBP2     | 10 | 126705065 | 1 | 1.904992 |
| rs3781411      | CTBP2     | 10 | 126705426 | 5 | 1.152123 |
| rs3781411      | CTBP2     | 10 | 126705426 | 1 | 4.701676 |
| rs3781411      | CTBP2     | 10 | 126705426 | 3 | 2.196332 |
| rs3781409      | CTBP2     | 10 | 126705619 | 2 | 0.265113 |
| rs3781409      | CTBP2     | 10 | 126705619 | 4 | 0.181739 |
| rs3781408      | CTBP2     | 10 | 126705682 | 5 | 1.16114  |
| rs2938006      | CTBP2     | 10 | 126706336 | 2 | 0.834554 |
| rs2938006      | CTBP2     | 10 | 126706336 | 8 | 2.938824 |
| rs2938006      | CTBP2     | 10 | 126706336 | 6 | 0.108241 |
| rs2938006      | CTBP2     | 10 | 126706336 | 4 | 0.813182 |
| rs2938006      | CTBP2     | 10 | 126706336 | 1 | 0.460122 |
| rs2938006      | CTBP2     | 10 | 126706336 | 5 | 0.31895  |
| rs17153510     | C10orf137 | 10 | 127431429 | 2 | 2.907063 |
| rs7913591      | ADAM12    | 10 | 127695394 | 3 | 0.894479 |
| rs7913591      | ADAM12    | 10 | 127695394 | 8 | 5.580747 |

|                |             |    |           |   |          |
|----------------|-------------|----|-----------|---|----------|
| rs2292692      | ADAM12      | 10 | 127727920 | 4 | 0.80661  |
| rs2292692      | ADAM12      | 10 | 127727920 | 3 | 0.115255 |
| rs1278279      | ADAM12      | 10 | 127743468 | 8 | 4.803943 |
| rs1278279      | ADAM12      | 10 | 127743468 | 4 | 1.131559 |
| rs7077404      | hCG_2044975 | 10 | 128137874 | 7 | 1.149405 |
| rs7077404      | hCG_2044975 | 10 | 128137874 | 3 | 1.421522 |
| rs7077404      | hCG_2044975 | 10 | 128137874 | 5 | 1.209292 |
| SNP10-12818335 | C10orf90    | 10 | 128183358 | 2 | 4.458402 |
| rs1436803      | C10orf90    | 10 | 128192425 | 8 | 6.240668 |
| rs1436803      | C10orf90    | 10 | 128192425 | 2 | 4.763984 |
| rs4962342      | C10orf90    | 10 | 128199949 | 3 | 0.115409 |
| rs11595374     | C10orf141   | 10 | 128825473 | 6 | 0.851167 |
| rs11595374     | C10orf141   | 10 | 128825473 | 1 | 5.076645 |
| rs2229599      | DOCK1       | 10 | 129097419 | 3 | 1.207287 |
| rs1051039      | DOCK1       | 10 | 129140593 | 6 | 0.140827 |
| rs1051039      | DOCK1       | 10 | 129140593 | 2 | 1.947024 |
| rs1051039      | DOCK1       | 10 | 129140593 | 8 | 0.083081 |
| rs1051039      | DOCK1       | 10 | 129140593 | 1 | 0.372343 |
| rs1051039      | DOCK1       | 10 | 129140593 | 5 | 0.454038 |
| rs4143258      | LOC387720   | 10 | 129423831 | 7 | 0.434284 |
| SNP10-12974440 | PTPRE       | 10 | 129744404 | 1 | 5.578781 |
| rs7100666      | PTPRE       | 10 | 129756439 | 7 | 0.551799 |
| rs7100666      | PTPRE       | 10 | 129756439 | 1 | 5.322532 |
| rs8436         | MKI67       | 10 | 129784973 | 4 | 0.621512 |
| rs8436         | MKI67       | 10 | 129784973 | 7 | 0.271807 |
| rs8436         | MKI67       | 10 | 129784973 | 8 | 0.551672 |
| rs8436         | MKI67       | 10 | 129784973 | 2 | 6.858843 |
| rs1050793      | MKI67       | 10 | 129785351 | 7 | 0.799297 |
| rs1050793      | MKI67       | 10 | 129785351 | 8 | 11.94529 |
| rs1050793      | MKI67       | 10 | 129785351 | 2 | 7.323301 |
| rs1050793      | MKI67       | 10 | 129785351 | 4 | 0.305421 |
| rs1050793      | MKI67       | 10 | 129785351 | 1 | 0.262457 |
| rs4750935      | MKI67       | 10 | 129787304 | 7 | 0.351481 |
| rs2071496      | MKI67       | 10 | 129791491 | 1 | 2.688748 |
| rs2071496      | MKI67       | 10 | 129791491 | 5 | 2.638221 |
| rs2071496      | MKI67       | 10 | 129791491 | 6 | 8.016119 |
| SNP10-12979173 | MKI67       | 10 | 129791737 | 1 | 1.845386 |
| SNP10-12979173 | MKI67       | 10 | 129791737 | 5 | 0.472774 |
| rs1277740      | MKI67       | 10 | 129792148 | 7 | 0.351389 |
| SNP10-12979446 | MKI67       | 10 | 129794464 | 3 | 0.872726 |
| SNP10-12979446 | MKI67       | 10 | 129794464 | 7 | 0.758237 |
| SNP10-12979446 | MKI67       | 10 | 129794467 | 7 | 0.72524  |
| SNP10-12979446 | MKI67       | 10 | 129794467 | 4 | 3.260813 |
| rs3740423      | MKI67       | 10 | 129795886 | 6 | 0.212156 |
| rs3740423      | MKI67       | 10 | 129795886 | 1 | 3.539714 |
| rs2240         | MKI67       | 10 | 129797534 | 7 | 6.990494 |
| rs2240         | MKI67       | 10 | 129797534 | 4 | 0.825317 |

|                |             |    |           |   |          |
|----------------|-------------|----|-----------|---|----------|
| SNP10-12979760 | MKI67       | 10 | 129797600 | 5 | 1.576401 |
| rs2071498      | MKI67       | 10 | 129807550 | 4 | 2.117279 |
| rs2071498      | MKI67       | 10 | 129807550 | 1 | 4.104061 |
| rs2071498      | MKI67       | 10 | 129807550 | 8 | 0.832094 |
| rs2071498      | MKI67       | 10 | 129807550 | 6 | 0.802697 |
| rs3740427      | hCG_1795091 | 10 | 130603278 | 7 | 1.234846 |
| rs12917        | MGMT        | 10 | 131396273 | 2 | 6.176935 |
| rs12917        | MGMT        | 10 | 131396273 | 1 | 0.465458 |
| rs12917        | MGMT        | 10 | 131396273 | 3 | 0.21378  |
| rs8217         | EBF3        | 10 | 131523710 | 4 | 0.063507 |
| rs8217         | EBF3        | 10 | 131523710 | 2 | 2.022042 |
| rs8217         | EBF3        | 10 | 131523710 | 5 | 1.332794 |
| rs8217         | EBF3        | 10 | 131523710 | 7 | 0.993928 |
| rs8217         | EBF3        | 10 | 131523710 | 8 | 0.093935 |
| rs13991        | GLRX3       | 10 | 131824737 | 6 | 0.447488 |
| rs13991        | GLRX3       | 10 | 131824737 | 2 | 0.146637 |
| rs7088377      | TCERG1L     | 10 | 132781016 | 8 | 0.583068 |
| rs7088377      | TCERG1L     | 10 | 132781016 | 3 | 1.447327 |
| rs7088377      | TCERG1L     | 10 | 132781016 | 1 | 0.310908 |
| rs7088377      | TCERG1L     | 10 | 132781016 | 5 | 0.12038  |
| rs7088377      | TCERG1L     | 10 | 132781016 | 2 | 0.363058 |
| rs7088377      | TCERG1L     | 10 | 132781016 | 6 | 1.282479 |
| rs7088377      | TCERG1L     | 10 | 132781016 | 4 | 1.479833 |
| rs7071145      | TCERG1L     | 10 | 132781192 | 3 | 0.650197 |
| rs7071145      | TCERG1L     | 10 | 132781192 | 2 | 1.334309 |
| rs7071145      | TCERG1L     | 10 | 132781192 | 6 | 4.014691 |
| rs7071145      | TCERG1L     | 10 | 132781192 | 5 | 1.113459 |
| rs9419600      | FLJ46300    | 10 | 133457501 | 2 | 0.115616 |
| rs9419600      | FLJ46300    | 10 | 133457501 | 3 | 0.070252 |
| rs9419600      | FLJ46300    | 10 | 133457501 | 4 | 0.885133 |
| rs4897739      | FLJ46300    | 10 | 133457882 | 3 | 0.346268 |
| rs4897783      | FLJ46300    | 10 | 133458227 | 2 | 0.540549 |
| rs4897783      | FLJ46300    | 10 | 133458227 | 3 | 0.153116 |
| rs4897742      | FLJ46300    | 10 | 133458281 | 4 | 1.234799 |
| rs2818384      | C10orf39    | 10 | 133811484 | 5 | 0.069751 |
| rs2818384      | C10orf39    | 10 | 133811484 | 7 | 0.475717 |
| rs2818384      | C10orf39    | 10 | 133811484 | 1 | 0.826988 |
| rs2818384      | C10orf39    | 10 | 133811484 | 2 | 0.788271 |
| rs2247705      | DPYSL4      | 10 | 133863980 | 4 | 0.415474 |
| rs2247705      | DPYSL4      | 10 | 133863980 | 6 | 3.212413 |
| rs2247705      | DPYSL4      | 10 | 133863980 | 1 | 4.46288  |
| rs12313        | DPYSL4      | 10 | 133867285 | 1 | 1.420738 |
| rs12313        | DPYSL4      | 10 | 133867285 | 4 | 0.672512 |
| rs12313        | DPYSL4      | 10 | 133867285 | 2 | 3.668167 |
| rs2474329      | LRRC27      | 10 | 134011507 | 5 | 0.664803 |
| rs4443996      | LRRC27      | 10 | 134040995 | 5 | 1.355089 |
| rs4443996      | LRRC27      | 10 | 134040995 | 1 | 1.408032 |

|                |           |    |           |   |          |
|----------------|-----------|----|-----------|---|----------|
| rs4443996      | LRRC27    | 10 | 134040995 | 6 | 1.520476 |
| rs4443996      | LRRC27    | 10 | 134040995 | 7 | 2.286313 |
| rs4443996      | LRRC27    | 10 | 134040995 | 2 | 1.89891  |
| rs10870302     | LRRC27    | 10 | 134041728 | 1 | 0.225338 |
| rs10870303     | LRRC27    | 10 | 134041801 | 5 | 0.907976 |
| rs10870303     | LRRC27    | 10 | 134041801 | 1 | 1.606969 |
| rs10870303     | LRRC27    | 10 | 134041801 | 7 | 1.282884 |
| rs11146378     | C10orf91  | 10 | 134111800 | 1 | 3.499603 |
| rs945943       | INPP5A    | 10 | 134390390 | 5 | 0.226481 |
| rs7090011      | C10orf92  | 10 | 134476373 | 7 | 0.975525 |
| rs4880433      | C10orf92  | 10 | 134496978 | 7 | 0.095513 |
| rs4880433      | C10orf92  | 10 | 134496978 | 4 | 0.059983 |
| rs4880433      | C10orf92  | 10 | 134496978 | 6 | 0.184975 |
| rs10870341     | C10orf92  | 10 | 134509616 | 7 | 1.150663 |
| rs12781609     | C10orf93  | 10 | 134598321 | 1 | 5.341069 |
| rs12781609     | C10orf93  | 10 | 134598321 | 8 | 3.582228 |
| rs12781609     | C10orf93  | 10 | 134598321 | 4 | 0.767382 |
| rs12781609     | C10orf93  | 10 | 134598321 | 6 | 1.824087 |
| rs2998139      | KNDC1     | 10 | 134862152 | 7 | 1.462647 |
| rs2998139      | KNDC1     | 10 | 134862152 | 2 | 2.739445 |
| rs2998139      | KNDC1     | 10 | 134862152 | 4 | 2.231241 |
| rs1131718      | ADAM8     | 10 | 134935744 | 3 | 0.175934 |
| rs1131718      | ADAM8     | 10 | 134935744 | 5 | 1.089672 |
| rs3008326      | ADAM8     | 10 | 134937511 | 6 | 0.643158 |
| rs2275725      | ADAM8     | 10 | 134939025 | 5 | 0.870641 |
| SNP10-13504513 | PAOX      | 10 | 135045138 | 5 | 0.26753  |
| rs1046175      | PAOX      | 10 | 135054940 | 7 | 0.216522 |
| rs1046175      | PAOX      | 10 | 135054940 | 6 | 1.534847 |
| rs1329151      | SPRN      | 10 | 135084383 | 1 | 2.001637 |
| rs10776681     | SPRN      | 10 | 135085679 | 1 | 4.231163 |
| rs2492654      | LOC619207 | 10 | 135128183 | 3 | 0.512455 |
| rs2492654      | LOC619207 | 10 | 135128183 | 1 | 3.435976 |
| rs10776682     | LOC619207 | 10 | 135131627 | 1 | 6.502957 |
| rs10776682     | LOC619207 | 10 | 135131627 | 3 | 0.936184 |
| rs10857722     | LOC619207 | 10 | 135131734 | 3 | 0.173085 |
| rs10857722     | LOC619207 | 10 | 135131734 | 1 | 6.922055 |
| rs6413419      | CYP2E1    | 10 | 135195665 | 5 | 0.721752 |
| rs6413419      | CYP2E1    | 10 | 135195665 | 2 | 6.747701 |
| rs2515641      | CYP2E1    | 10 | 135201352 | 1 | 0.07777  |
| rs2515641      | CYP2E1    | 10 | 135201352 | 2 | 2.857474 |
| rs2515641      | CYP2E1    | 10 | 135201352 | 5 | 0.53249  |
| rs7081484      | CYP2E1    | 10 | 135202480 | 1 | 2.612894 |
| rs8181357      | SYCE1     | 10 | 135220629 | 8 | 2.609795 |
| rs12226697     | SIRT3     | 11 | 206056    | 3 | 0.89098  |
| rs11555236     | SIRT3     | 11 | 223212    | 1 | 4.646088 |
| rs11555236     | SIRT3     | 11 | 223212    | 5 | 4.694514 |
| rs11555236     | SIRT3     | 11 | 223212    | 8 | 5.385862 |

|              |          |    |        |   |          |
|--------------|----------|----|--------|---|----------|
| rs11555236   | SIRT3    | 11 | 223212 | 6 | 2.268603 |
| rs7116130    | PSMD13   | 11 | 234129 | 7 | 2.047704 |
| rs7116130    | PSMD13   | 11 | 234129 | 8 | 0.662912 |
| rs7116130    | PSMD13   | 11 | 234129 | 5 | 0.968187 |
| rs7128029    | PSMD13   | 11 | 234141 | 7 | 1.713488 |
| rs7128029    | PSMD13   | 11 | 234141 | 5 | 1.73124  |
| rs7128029    | PSMD13   | 11 | 234141 | 6 | 2.707653 |
| rs1128320    | PSMD13   | 11 | 234167 | 5 | 1.629566 |
| rs1128320    | PSMD13   | 11 | 234167 | 8 | 4.81929  |
| rs1128320    | PSMD13   | 11 | 234167 | 6 | 5.621275 |
| rs1128321    | PSMD13   | 11 | 234171 | 6 | 1.811678 |
| rs1128321    | PSMD13   | 11 | 234171 | 5 | 0.540073 |
| rs1128321    | PSMD13   | 11 | 234171 | 7 | 5.994257 |
| rs1128322    | PSMD13   | 11 | 234197 | 5 | 0.907549 |
| rs1128322    | PSMD13   | 11 | 234197 | 8 | 1.586649 |
| rs1128322    | PSMD13   | 11 | 234197 | 6 | 0.770325 |
| rs1128322    | PSMD13   | 11 | 234197 | 7 | 0.706743 |
| rs11246050   | NLRP6    | 11 | 274257 | 1 | 3.771123 |
| rs11246050   | NLRP6    | 11 | 274257 | 6 | 2.430403 |
| rs11246050   | NLRP6    | 11 | 274257 | 3 | 2.543894 |
| rs2242564    | ATHL1    | 11 | 285006 | 1 | 0.434032 |
| rs2242564    | ATHL1    | 11 | 285006 | 5 | 4.224383 |
| rs2242564    | ATHL1    | 11 | 285006 | 2 | 5.362169 |
| SNP11-371754 | B4GALNT4 | 11 | 371754 | 7 | 0.521135 |
| rs3210908    | SIGIRR   | 11 | 396483 | 7 | 0.044277 |
| rs3210908    | SIGIRR   | 11 | 396483 | 6 | 5.224015 |
| rs10794324   | TMEM16J  | 11 | 418489 | 6 | 0.801671 |
| rs10794324   | TMEM16J  | 11 | 418489 | 3 | 1.202963 |
| rs10794324   | TMEM16J  | 11 | 418489 | 5 | 0.978843 |
| GA009268     | PTDSS2   | 11 | 480035 | 5 | 0.255025 |
| GA009268     | PTDSS2   | 11 | 480035 | 3 | 0.032222 |
| rs10540      | RNH1     | 11 | 484662 | 5 | 7.04973  |
| rs10540      | RNH1     | 11 | 484662 | 6 | 1.024376 |
| rs7944548    | RNH1     | 11 | 492217 | 1 | 4.956624 |
| rs7944548    | RNH1     | 11 | 492217 | 3 | 0.304746 |
| rs7944548    | RNH1     | 11 | 492217 | 6 | 4.254479 |
| rs7944548    | RNH1     | 11 | 492217 | 5 | 0.684749 |
| SNP11-541753 | LRRRC56  | 11 | 541753 | 7 | 1.219652 |
| SNP11-541753 | LRRRC56  | 11 | 541753 | 3 | 0.559066 |
| SNP11-541753 | LRRRC56  | 11 | 541753 | 5 | 0.945671 |
| SNP11-541753 | LRRRC56  | 11 | 541753 | 4 | 1.099073 |
| rs12277611   | LRRRC56  | 11 | 544798 | 6 | 2.15736  |
| rs12277611   | LRRRC56  | 11 | 544798 | 5 | 0.163744 |
| rs12277611   | LRRRC56  | 11 | 544798 | 7 | 0.758502 |
| rs2061586    | C11orf35 | 11 | 548884 | 5 | 0.110334 |
| rs2061586    | C11orf35 | 11 | 548884 | 7 | 0.151393 |
| rs2061586    | C11orf35 | 11 | 548884 | 4 | 0.778204 |

|               |           |    |         |   |          |
|---------------|-----------|----|---------|---|----------|
| rs12285942    | LOC143666 | 11 | 564813  | 7 | 1.61806  |
| rs12285942    | LOC143666 | 11 | 564813  | 4 | 1.06456  |
| rs12285942    | LOC143666 | 11 | 564813  | 5 | 1.478635 |
| SNP11-599577  | KIAA1542  | 11 | 599577  | 4 | 0.577095 |
| SNP11-599577  | KIAA1542  | 11 | 599577  | 7 | 0.167818 |
| SNP11-599577  | KIAA1542  | 11 | 599577  | 5 | 6.510931 |
| rs702965      | KIAA1542  | 11 | 601868  | 8 | 8.280188 |
| rs702966      | KIAA1542  | 11 | 601919  | 5 | 0.224023 |
| rs702966      | KIAA1542  | 11 | 601919  | 4 | 0.106597 |
| SNP11-604318  | IRF7      | 11 | 604318  | 7 | 4.971803 |
| SNP11-604318  | IRF7      | 11 | 604318  | 5 | 0.332163 |
| SNP11-604318  | IRF7      | 11 | 604318  | 4 | 1.0757   |
| rs7946354     | CEND1     | 11 | 777679  | 7 | 1.6136   |
| rs7946354     | CEND1     | 11 | 777679  | 3 | 0.236987 |
| rs6597982     | CEND1     | 11 | 778007  | 6 | 1.25061  |
| rs6597982     | CEND1     | 11 | 778007  | 8 | 0.758664 |
| rs6597982     | CEND1     | 11 | 778007  | 7 | 1.446764 |
| rs10902221    | LRDD      | 11 | 792379  | 3 | 0.70875  |
| rs7126805     | EFCAB4A   | 11 | 818916  | 4 | 0.487124 |
| rs7126805     | EFCAB4A   | 11 | 818916  | 6 | 7.921579 |
| rs7126805     | EFCAB4A   | 11 | 818916  | 5 | 0.124044 |
| rs7126805     | EFCAB4A   | 11 | 818916  | 2 | 1.264613 |
| rs7126805     | EFCAB4A   | 11 | 818916  | 1 | 0.444862 |
| rs28558789    | EFCAB4A   | 11 | 819539  | 6 | 1.692979 |
| rs28558789    | EFCAB4A   | 11 | 819539  | 4 | 0.434694 |
| rs28558789    | EFCAB4A   | 11 | 819539  | 1 | 2.098572 |
| rs28558789    | EFCAB4A   | 11 | 819539  | 2 | 3.026375 |
| rs28558789    | EFCAB4A   | 11 | 819539  | 5 | 1.169762 |
| SNP11-820044  | EFCAB4A   | 11 | 820044  | 8 | 0.181745 |
| rs35042031    | CD151     | 11 | 828222  | 3 | 0.561622 |
| rs8672        | CD151     | 11 | 828634  | 6 | 0.245332 |
| rs8672        | CD151     | 11 | 828634  | 5 | 0.591927 |
| rs8672        | CD151     | 11 | 828634  | 1 | 0.710999 |
| rs8672        | CD151     | 11 | 828634  | 2 | 5.743292 |
| rs8672        | CD151     | 11 | 828634  | 4 | 0.44988  |
| rs8672        | CD151     | 11 | 828634  | 8 | 6.721175 |
| rs1130719     | CD151     | 11 | 828760  | 4 | 6.83917  |
| rs1130719     | CD151     | 11 | 828760  | 5 | 0.349745 |
| rs1130719     | CD151     | 11 | 828760  | 8 | 0.478966 |
| rs1130719     | CD151     | 11 | 828760  | 2 | 1.641614 |
| rs1130719     | CD151     | 11 | 828760  | 1 | 0.484534 |
| rs1130719     | CD151     | 11 | 828760  | 6 | 0.534209 |
| GA009352      | AP2A2     | 11 | 1000649 | 6 | 0.644513 |
| GA009352      | AP2A2     | 11 | 1000649 | 3 | 0.183063 |
| SNP11-1001597 | AP2A2     | 11 | 1001597 | 8 | 4.773722 |
| rs7481521     | MUC6      | 11 | 1017811 | 1 | 0.625096 |
| rs7481521     | MUC6      | 11 | 1017811 | 7 | 1.73368  |

|               |           |    |         |   |          |
|---------------|-----------|----|---------|---|----------|
| rs11245929    | MUC2      | 11 | 1070954 | 1 | 0.75977  |
| rs11245929    | MUC2      | 11 | 1070954 | 6 | 0.066677 |
| rs41345745    | MUC2      | 11 | 1071112 | 8 | 0.194563 |
| rs41345745    | MUC2      | 11 | 1071112 | 4 | 0.713543 |
| rs41345745    | MUC2      | 11 | 1071112 | 6 | 0.424561 |
| rs41345745    | MUC2      | 11 | 1071112 | 3 | 0.264821 |
| rs41345745    | MUC2      | 11 | 1071112 | 1 | 0.927915 |
| SNP11-1071757 | MUC2      | 11 | 1071757 | 1 | 1.597587 |
| SNP11-1071757 | MUC2      | 11 | 1071757 | 3 | 0.062707 |
| rs11245936    | MUC2      | 11 | 1074362 | 1 | 4.49409  |
| rs11245936    | MUC2      | 11 | 1074362 | 6 | 1.036472 |
| SNP11-1083769 | MUC2      | 11 | 1083769 | 1 | 5.346468 |
| rs11245950    | MUC2      | 11 | 1084629 | 3 | 0.373254 |
| rs6421972     | MUC2      | 11 | 1086494 | 3 | 0.601261 |
| rs6421972     | MUC2      | 11 | 1086494 | 5 | 0.096468 |
| rs11245954    | MUC2      | 11 | 1091078 | 1 | 4.038243 |
| rs7126405     | MUC2      | 11 | 1093296 | 1 | 3.788242 |
| rs7126405     | MUC2      | 11 | 1093296 | 5 | 0.585061 |
| rs35783651    | NULL      | 11 | 1146646 | 7 | 0.245713 |
| rs4072884     | BRSK2     | 11 | 1439296 | 6 | 1.091163 |
| rs4072884     | BRSK2     | 11 | 1439296 | 4 | 0.334322 |
| rs4072884     | BRSK2     | 11 | 1439296 | 3 | 0.87826  |
| rs10742185    | HCCA2     | 11 | 1458246 | 2 | 4.572846 |
| SNP11-1737443 | CTSD      | 11 | 1737443 | 5 | 1.215149 |
| SNP11-1737443 | CTSD      | 11 | 1737443 | 1 | 1.86089  |
| rs10743009    | LOC390029 | 11 | 1780829 | 7 | 1.524531 |
| rs10743009    | LOC390029 | 11 | 1780829 | 8 | 1.139102 |
| rs10743009    | LOC390029 | 11 | 1780829 | 3 | 2.216578 |
| GA009397      | SYT8      | 11 | 1814327 | 5 | 8.104205 |
| GA009397      | SYT8      | 11 | 1814327 | 2 | 6.847538 |
| GA009397      | SYT8      | 11 | 1814327 | 3 | 0.122138 |
| GA009397      | SYT8      | 11 | 1814327 | 1 | 0.085206 |
| rs484955      | SYT8      | 11 | 1814838 | 5 | 7.597427 |
| SNP11-1934128 | MRPL23    | 11 | 1934128 | 6 | 5.973927 |
| SNP11-1934128 | MRPL23    | 11 | 1934128 | 4 | 8.995149 |
| SNP11-1934128 | MRPL23    | 11 | 1934128 | 2 | 2.582929 |
| rs2839698     | H19       | 11 | 1975429 | 6 | 0.459862 |
| rs2839698     | H19       | 11 | 1975429 | 1 | 0.355703 |
| rs2585        | IGF2      | 11 | 2107020 | 4 | 5.031769 |
| rs7873        | IGF2      | 11 | 2107273 | 5 | 0.923487 |
| rs2230949     | IGF2      | 11 | 2110764 | 6 | 1.554761 |
| rs1003483     | IGF2AS    | 11 | 2124119 | 3 | 0.05587  |
| rs1003483     | IGF2AS    | 11 | 2124119 | 5 | 1.358003 |
| rs1003483     | IGF2AS    | 11 | 2124119 | 7 | 0.580929 |
| rs1003483     | IGF2AS    | 11 | 2124119 | 1 | 0.401412 |
| rs10770125    | IGF2AS    | 11 | 2125590 | 7 | 1.414231 |
| rs3741205     | IGF2AS    | 11 | 2126460 | 1 | 1.917894 |

|            |          |    |         |   |          |
|------------|----------|----|---------|---|----------|
| rs3741205  | IGF2AS   | 11 | 2126460 | 6 | 1.208524 |
| rs6357     | TH       | 11 | 2144814 | 5 | 1.838534 |
| rs6357     | TH       | 11 | 2144814 | 3 | 0.644848 |
| rs6357     | TH       | 11 | 2144814 | 7 | 0.907    |
| rs2072072  | ASCL2    | 11 | 2246772 | 6 | 1.170962 |
| rs1501466  | C11orf21 | 11 | 2277460 | 3 | 0.607654 |
| rs756924   | C11orf21 | 11 | 2279605 | 5 | 0.155615 |
| rs1057128  | KCNQ1    | 11 | 2753813 | 1 | 5.574856 |
| rs1057128  | KCNQ1    | 11 | 2753813 | 4 | 2.655369 |
| rs10798    | KCNQ1    | 11 | 2826741 | 2 | 1.037153 |
| rs10798    | KCNQ1    | 11 | 2826741 | 4 | 4.626581 |
| rs10798    | KCNQ1    | 11 | 2826741 | 1 | 2.306383 |
| rs10798    | KCNQ1    | 11 | 2826741 | 5 | 3.417628 |
| rs1048046  | SLC22A18 | 11 | 2881167 | 3 | 0.17607  |
| rs1048046  | SLC22A18 | 11 | 2881167 | 4 | 0.462082 |
| rs1048046  | SLC22A18 | 11 | 2881167 | 6 | 0.886734 |
| rs1129782  | SLC22A18 | 11 | 2900247 | 4 | 3.962619 |
| rs1129782  | SLC22A18 | 11 | 2900247 | 6 | 0.123066 |
| rs1056819  | PHLDA2   | 11 | 2906437 | 6 | 7.561292 |
| rs8505     | NAP1L4   | 11 | 2922869 | 1 | 4.610391 |
| rs8505     | NAP1L4   | 11 | 2922869 | 3 | 0.355132 |
| rs8505     | NAP1L4   | 11 | 2922869 | 4 | 0.442628 |
| rs8505     | NAP1L4   | 11 | 2922869 | 8 | 0.55812  |
| rs2411767  | NAP1L4   | 11 | 2949929 | 6 | 0.276046 |
| rs729662   | CARS     | 11 | 2984716 | 3 | 0.657181 |
| rs729662   | CARS     | 11 | 2984716 | 1 | 2.862735 |
| rs729662   | CARS     | 11 | 2984716 | 7 | 0.25096  |
| rs729662   | CARS     | 11 | 2984716 | 4 | 6.776284 |
| rs3741350  | OSBPL5   | 11 | 3085603 | 4 | 0.261002 |
| rs3741350  | OSBPL5   | 11 | 3085603 | 3 | 1.113371 |
| rs11026004 | C11orf36 | 11 | 3199922 | 3 | 0.422271 |
| rs11026004 | C11orf36 | 11 | 3199922 | 5 | 0.456944 |
| rs12275900 | C11orf36 | 11 | 3200003 | 3 | 0.636896 |
| rs12275900 | C11orf36 | 11 | 3200003 | 1 | 0.485399 |
| rs12275900 | C11orf36 | 11 | 3200003 | 5 | 1.01826  |
| rs10766783 | C11orf36 | 11 | 3200214 | 3 | 0.001386 |
| rs7924967  | ZNF195   | 11 | 3336572 | 5 | 1.918265 |
| rs7924967  | ZNF195   | 11 | 3336572 | 7 | 8.757331 |
| rs2271584  | TRPC2    | 11 | 3613097 | 5 | 0.745197 |
| rs2271584  | TRPC2    | 11 | 3613097 | 2 | 0.913709 |
| rs2271584  | TRPC2    | 11 | 3613097 | 3 | 0.699093 |
| rs2271584  | TRPC2    | 11 | 3613097 | 7 | 1.305897 |
| rs1514691  | TRPC2    | 11 | 3614012 | 2 | 3.57363  |
| rs1514691  | TRPC2    | 11 | 3614012 | 7 | 2.333268 |
| rs1514691  | TRPC2    | 11 | 3614012 | 5 | 0.137707 |
| rs6578404  | TRPC2    | 11 | 3615061 | 5 | 0.754699 |
| rs6578404  | TRPC2    | 11 | 3615061 | 7 | 2.754303 |



|            |           |    |         |   |          |
|------------|-----------|----|---------|---|----------|
| rs2271585  | ART5      | 11 | 3616344 | 3 | 1.45099  |
| rs2271585  | ART5      | 11 | 3616344 | 5 | 1.539881 |
| rs2271586  | ART5      | 11 | 3616569 | 7 | 0.091366 |
| rs2271586  | ART5      | 11 | 3616569 | 3 | 0.205274 |
| rs2271586  | ART5      | 11 | 3616569 | 5 | 4.028309 |
| rs7128137  | ART5      | 11 | 3619777 | 8 | 1.003476 |
| rs7128137  | ART5      | 11 | 3619777 | 1 | 1.914636 |
| rs7128137  | ART5      | 11 | 3619777 | 4 | 2.955573 |
| rs7128137  | ART5      | 11 | 3619777 | 7 | 2.710927 |
| rs15820    | FRAG1     | 11 | 3804006 | 6 | 0.724017 |
| rs15820    | FRAG1     | 11 | 3804006 | 8 | 3.443345 |
| rs15820    | FRAG1     | 11 | 3804006 | 1 | 3.31772  |
| rs926101   | TRIM21    | 11 | 4367817 | 5 | 1.623813 |
| rs926101   | TRIM21    | 11 | 4367817 | 1 | 3.883668 |
| rs1426378  | TRIM21    | 11 | 4371449 | 1 | 6.522783 |
| rs1426378  | TRIM21    | 11 | 4371449 | 5 | 0.373299 |
| rs12295898 | OR52M1    | 11 | 4523761 | 1 | 0.184365 |
| rs12795289 | C11orf40  | 11 | 4551121 | 3 | 0.078382 |
| rs4910638  | TRIM68    | 11 | 4577437 | 6 | 0.779988 |
| rs4910638  | TRIM68    | 11 | 4577437 | 3 | 2.433299 |
| rs4910638  | TRIM68    | 11 | 4577437 | 5 | 4.260857 |
| rs2231975  | TRIM68    | 11 | 4578215 | 3 | 0.354972 |
| rs905871   | OR51D1    | 11 | 4617861 | 6 | 3.50057  |
| rs3817098  | OR51E1    | 11 | 4631151 | 1 | 1.266681 |
| rs10836532 | LOC643447 | 11 | 4701730 | 8 | 1.400932 |
| rs10836532 | LOC643447 | 11 | 4701730 | 1 | 0.912994 |
| rs10836532 | LOC643447 | 11 | 4701730 | 4 | 1.032601 |
| rs10836532 | LOC643447 | 11 | 4701730 | 3 | 0.602884 |
| rs11033544 | LOC643447 | 11 | 4701741 | 7 | 0.04453  |
| rs11033544 | LOC643447 | 11 | 4701741 | 3 | 0.722435 |
| rs1030726  | OR51F1    | 11 | 4746844 | 3 | 1.040538 |
| rs11033796 | OR51F1    | 11 | 4747334 | 4 | 3.472557 |
| rs11033796 | OR51F1    | 11 | 4747334 | 3 | 0.77154  |
| rs2053116  | OR52R1    | 11 | 4781454 | 3 | 0.393037 |
| rs2499953  | MMP26     | 11 | 4967481 | 1 | 2.172769 |
| rs10768450 | OR51L1    | 11 | 4977408 | 5 | 1.617923 |
| rs10768450 | OR51L1    | 11 | 4977408 | 3 | 0.166663 |
| rs2500017  | OR52J3    | 11 | 5024713 | 3 | 0.638956 |
| rs2500017  | OR52J3    | 11 | 5024713 | 7 | 0.277073 |
| rs2500017  | OR52J3    | 11 | 5024713 | 1 | 1.006876 |
| rs17350764 | OR52J3    | 11 | 5025007 | 8 | 0.150934 |
| rs10837374 | OR52A4    | 11 | 5098478 | 2 | 2.916264 |
| rs7947334  | OR52A4    | 11 | 5099125 | 7 | 0.380771 |
| rs7947334  | OR52A4    | 11 | 5099125 | 1 | 6.277489 |
| rs2472530  | OR52A5    | 11 | 5109837 | 2 | 2.223158 |
| rs2472530  | OR52A5    | 11 | 5109837 | 7 | 2.567839 |
| rs1894397  | HBG2      | 11 | 5232563 | 5 | 1.810971 |

|            |           |    |         |   |          |
|------------|-----------|----|---------|---|----------|
| rs11036814 | OR51B2    | 11 | 5301168 | 3 | 0.813311 |
| rs4910551  | OR51B5    | 11 | 5320852 | 1 | 1.339052 |
| rs11036913 | OR51B5    | 11 | 5321318 | 8 | 4.485866 |
| rs4910756  | OR51B6    | 11 | 5329432 | 1 | 1.235955 |
| rs5006887  | OR51B6    | 11 | 5329705 | 3 | 1.035235 |
| rs5006884  | OR51B6    | 11 | 5329827 | 3 | 0.294199 |
| rs5006884  | OR51B6    | 11 | 5329827 | 1 | 0.057045 |
| rs5006884  | OR51B6    | 11 | 5329827 | 7 | 0.319523 |
| rs5006884  | OR51B6    | 11 | 5329827 | 6 | 1.457643 |
| rs5024042  | OR51B6    | 11 | 5330138 | 3 | 0.039551 |
| rs2647598  | LOC643745 | 11 | 5332852 | 1 | 1.767002 |
| rs2647598  | LOC643745 | 11 | 5332852 | 3 | 0.524103 |
| rs17270818 | LOC643753 | 11 | 5340646 | 6 | 2.032888 |
| rs17270818 | LOC643753 | 11 | 5340646 | 3 | 2.627629 |
| rs17270818 | LOC643753 | 11 | 5340646 | 1 | 4.188945 |
| rs17270818 | LOC643753 | 11 | 5340646 | 7 | 2.863736 |
| rs2736588  | OR51Q1    | 11 | 5400276 | 1 | 2.119082 |
| rs10838092 | OR51Q1    | 11 | 5400443 | 3 | 1.10892  |
| rs10838092 | OR51Q1    | 11 | 5400443 | 1 | 1.190215 |
| rs10838093 | OR51Q1    | 11 | 5400463 | 1 | 1.291456 |
| rs10838093 | OR51Q1    | 11 | 5400463 | 7 | 2.627786 |
| rs10838093 | OR51Q1    | 11 | 5400463 | 3 | 2.043424 |
| rs10838095 | OR51Q1    | 11 | 5400539 | 3 | 0.333841 |
| rs10838095 | OR51Q1    | 11 | 5400539 | 1 | 2.420731 |
| rs10838095 | OR51Q1    | 11 | 5400539 | 8 | 3.707262 |
| rs2736586  | OR51Q1    | 11 | 5400637 | 3 | 0.140296 |
| rs2736586  | OR51Q1    | 11 | 5400637 | 1 | 2.671853 |
| rs11037445 | OR51I1    | 11 | 5418831 | 1 | 0.57519  |
| rs12577167 | OR51I2    | 11 | 5431694 | 4 | 0.145776 |
| rs7950082  | OR52D1    | 11 | 5467174 | 4 | 1.379943 |
| rs7101919  | OR52D1    | 11 | 5467264 | 2 | 0.311614 |
| rs2227271  | UBQLN3    | 11 | 5485494 | 4 | 0.456473 |
| rs1044392  | UBQLNL    | 11 | 5492247 | 2 | 2.329056 |
| rs1044392  | UBQLNL    | 11 | 5492247 | 6 | 0.628462 |
| rs2017434  | UBQLNL    | 11 | 5493428 | 2 | 4.240033 |
| rs2017434  | UBQLNL    | 11 | 5493428 | 6 | 0.841908 |
| rs872751   | UBQLNL    | 11 | 5493621 | 6 | 0.483443 |
| rs872751   | UBQLNL    | 11 | 5493621 | 2 | 4.205136 |
| rs2047456  | UBQLNL    | 11 | 5493737 | 6 | 1.088683 |
| rs7131665  | LOC643810 | 11 | 5496246 | 8 | 0.070752 |
| rs7945342  | LOC643810 | 11 | 5500281 | 6 | 0.559482 |
| rs7934354  | OR52H1    | 11 | 5522482 | 4 | 0.187114 |
| rs1995158  | OR52H1    | 11 | 5522606 | 3 | 1.503279 |
| rs1995157  | OR52H1    | 11 | 5522627 | 4 | 0.569931 |
| rs1995156  | OR52H1    | 11 | 5522688 | 4 | 0.485558 |
| rs1566275  | OR52H1    | 11 | 5522941 | 3 | 1.667214 |
| rs1566275  | OR52H1    | 11 | 5522941 | 8 | 0.36863  |

|            |              |    |         |   |          |
|------------|--------------|----|---------|---|----------|
| rs10769054 | OR52H1       | 11 | 5523065 | 6 | 0.770295 |
| rs10769054 | OR52H1       | 11 | 5523065 | 4 | 1.49311  |
| rs11038141 | LOC728732    | 11 | 5548802 | 4 | 4.491746 |
| rs1077126  | OR52B6       | 11 | 5558851 | 4 | 0.889999 |
| rs2341434  | OR52B6       | 11 | 5559191 | 7 | 1.184716 |
| rs2163946  | OR52B6       | 11 | 5559366 | 7 | 0.947135 |
| rs2163946  | OR52B6       | 11 | 5559366 | 6 | 0.007563 |
| rs2163946  | OR52B6       | 11 | 5559366 | 2 | 1.124882 |
| rs10769086 | OR52B6       | 11 | 5559544 | 1 | 3.046909 |
| rs12272467 | TRIM6-TRIM34 | 11 | 5574563 | 3 | 0.938926 |
| rs12272467 | TRIM6-TRIM34 | 11 | 5574563 | 2 | 4.403503 |
| rs12272467 | TRIM6-TRIM34 | 11 | 5574563 | 6 | 0.741438 |
| rs12272467 | TRIM6-TRIM34 | 11 | 5574563 | 1 | 0.894217 |
| rs12272467 | TRIM6-TRIM34 | 11 | 5574563 | 7 | 0.036196 |
| rs7104648  | TRIM6        | 11 | 5590323 | 7 | 1.71456  |
| rs11038346 | TRIM6        | 11 | 5590621 | 7 | 1.318634 |
| rs3740998  | TRIM34       | 11 | 5621407 | 1 | 4.899729 |
| rs3740998  | TRIM34       | 11 | 5621407 | 6 | 5.635925 |
| rs3740995  | TRIM5        | 11 | 5656916 | 6 | 4.66283  |
| rs10838525 | TRIM5        | 11 | 5657577 | 2 | 5.136875 |
| rs10838525 | TRIM5        | 11 | 5657577 | 3 | 1.015766 |
| rs10838525 | TRIM5        | 11 | 5657577 | 8 | 1.516392 |
| rs10838525 | TRIM5        | 11 | 5657577 | 7 | 1.501328 |
| rs1063303  | TRIM22       | 11 | 5676326 | 4 | 1.761627 |
| rs1063303  | TRIM22       | 11 | 5676326 | 6 | 0.243353 |
| rs1063303  | TRIM22       | 11 | 5676326 | 7 | 1.452588 |
| rs12364019 | TRIM22       | 11 | 5686919 | 4 | 2.734281 |
| rs12417798 | TRIM22       | 11 | 5688158 | 2 | 4.467559 |
| rs12417798 | TRIM22       | 11 | 5688158 | 1 | 0.529011 |
| rs7397032  | OR56B1       | 11 | 5714638 | 6 | 0.796551 |
| rs7397032  | OR56B1       | 11 | 5714638 | 1 | 1.321857 |
| rs7397032  | OR56B1       | 11 | 5714638 | 2 | 1.129563 |
| rs4910844  | OR52N4       | 11 | 5733060 | 3 | 1.067305 |
| rs12363178 | OR52N4       | 11 | 5733171 | 1 | 1.18095  |
| rs10769224 | OR52N1       | 11 | 5766249 | 3 | 2.908937 |
| rs4758435  | OR52N2       | 11 | 5798432 | 7 | 1.479095 |
| rs8181512  | OR52N2       | 11 | 5798932 | 1 | 0.640284 |
| rs8181512  | OR52N2       | 11 | 5798932 | 7 | 1.182736 |
| rs8181512  | OR52N2       | 11 | 5798932 | 3 | 1.610102 |
| rs10160336 | OR52E5       | 11 | 5878798 | 7 | 0.61634  |
| rs1840178  | OR56A3       | 11 | 5925304 | 7 | 0.717297 |
| rs1840178  | OR56A3       | 11 | 5925304 | 3 | 1.080212 |
| rs1462983  | OR56B4       | 11 | 6086413 | 4 | 1.150409 |
| rs10839531 | OR52W1       | 11 | 6177745 | 5 | 0.561561 |
| rs10839531 | OR52W1       | 11 | 6177745 | 2 | 0.455031 |
| rs11040799 | OR52W1       | 11 | 6177790 | 3 | 0.841461 |
| rs11040799 | OR52W1       | 11 | 6177790 | 5 | 0.208514 |

|               |           |    |         |   |          |
|---------------|-----------|----|---------|---|----------|
| rs10769671    | C11orf42  | 11 | 6188307 | 1 | 1.345259 |
| rs10769671    | C11orf42  | 11 | 6188307 | 8 | 0.187233 |
| rs10769671    | C11orf42  | 11 | 6188307 | 5 | 0.075785 |
| rs10769671    | C11orf42  | 11 | 6188307 | 3 | 0.594058 |
| rs10769671    | C11orf42  | 11 | 6188307 | 2 | 0.581289 |
| SNP11-6195239 | C11orf56  | 11 | 6195239 | 7 | 0.094972 |
| rs11040809    | C11orf56  | 11 | 6195715 | 3 | 0.599708 |
| rs11040809    | C11orf56  | 11 | 6195715 | 7 | 0.306708 |
| rs11040809    | C11orf56  | 11 | 6195715 | 4 | 0.591307 |
| rs11040809    | C11orf56  | 11 | 6195715 | 8 | 3.259348 |
| rs3750945     | C11orf56  | 11 | 6200380 | 2 | 4.738434 |
| rs3750945     | C11orf56  | 11 | 6200380 | 5 | 0.101678 |
| rs7129498     | CNGA4     | 11 | 6219291 | 5 | 0.275421 |
| rs7129498     | CNGA4     | 11 | 6219291 | 2 | 2.648361 |
| rs1042047     | CCKBR     | 11 | 6249758 | 3 | 1.397637 |
| rs1042047     | CCKBR     | 11 | 6249758 | 2 | 3.895615 |
| rs1042047     | CCKBR     | 11 | 6249758 | 7 | 0.644145 |
| SNP11-6297941 | PRKCDBP   | 11 | 6297941 | 8 | 1.350355 |
| SNP11-6297941 | PRKCDBP   | 11 | 6297941 | 4 | 1.176491 |
| SNP11-6297941 | PRKCDBP   | 11 | 6297941 | 7 | 0.181774 |
| rs10606       | TRIM3     | 11 | 6434407 | 8 | 0.372242 |
| rs10606       | TRIM3     | 11 | 6434407 | 4 | 0.619457 |
| rs10606       | TRIM3     | 11 | 6434407 | 7 | 0.920861 |
| rs11604726    | FXC1      | 11 | 6459303 | 8 | 1.686937 |
| rs11604726    | FXC1      | 11 | 6459303 | 4 | 1.034039 |
| rs11555935    | FXC1      | 11 | 6459356 | 4 | 0.035254 |
| rs11555935    | FXC1      | 11 | 6459356 | 7 | 0.241129 |
| SNP11-6476218 | C11orf47  | 11 | 6476218 | 1 | 4.607425 |
| SNP11-6476218 | C11orf47  | 11 | 6476218 | 3 | 0.617249 |
| rs2555158     | C11orf47  | 11 | 6476740 | 3 | 0.382693 |
| rs2555158     | C11orf47  | 11 | 6476740 | 1 | 5.099719 |
| rs11603869    | C11orf47  | 11 | 6497801 | 8 | 1.058044 |
| rs11603869    | C11orf47  | 11 | 6497801 | 4 | 0.504554 |
| rs11040923    | LOC728714 | 11 | 6541583 | 6 | 3.918961 |
| rs11040923    | LOC728714 | 11 | 6541583 | 1 | 3.211869 |
| rs11040923    | LOC728714 | 11 | 6541583 | 4 | 0.787852 |
| rs1045450     | TPP1      | 11 | 6591235 | 4 | 0.133343 |
| rs1128396     | TPP1      | 11 | 6592682 | 4 | 0.594705 |
| rs4758443     | DCHS1     | 11 | 6605000 | 2 | 2.817892 |
| rs4758443     | DCHS1     | 11 | 6605000 | 7 | 0.821549 |
| rs4758443     | DCHS1     | 11 | 6605000 | 4 | 1.032468 |
| rs7937911     | GVIN1     | 11 | 6692445 | 3 | 0.517519 |
| rs11040982    | GVIN1     | 11 | 6694555 | 2 | 2.711665 |
| rs11040982    | GVIN1     | 11 | 6694555 | 7 | 1.105497 |
| rs11040983    | GVIN1     | 11 | 6694867 | 6 | 0.501378 |
| rs10769716    | GVIN1     | 11 | 6695528 | 3 | 0.291968 |
| rs10769716    | GVIN1     | 11 | 6695528 | 4 | 1.571699 |

|            |        |    |         |   |          |
|------------|--------|----|---------|---|----------|
| rs12284429 | GVIN1  | 11 | 6695983 | 3 | 1.16754  |
| rs12284429 | GVIN1  | 11 | 6695983 | 7 | 0.940881 |
| rs12284429 | GVIN1  | 11 | 6695983 | 5 | 0.57847  |
| rs12284429 | GVIN1  | 11 | 6695983 | 4 | 0.461613 |
| rs12284429 | GVIN1  | 11 | 6695983 | 6 | 0.821365 |
| rs12223353 | GVIN1  | 11 | 6696884 | 7 | 0.80357  |
| rs12223353 | GVIN1  | 11 | 6696884 | 3 | 0.272948 |
| rs11040999 | GVIN1  | 11 | 6724185 | 5 | 0.988044 |
| rs11040999 | GVIN1  | 11 | 6724185 | 4 | 1.712662 |
| rs11040999 | GVIN1  | 11 | 6724185 | 2 | 2.876496 |
| rs11040999 | GVIN1  | 11 | 6724185 | 3 | 0.339103 |
| rs10839616 | OR2AG2 | 11 | 6746604 | 7 | 0.008335 |
| rs10839616 | OR2AG2 | 11 | 6746604 | 4 | 1.566481 |
| rs10839616 | OR2AG2 | 11 | 6746604 | 5 | 0.430167 |
| rs866347   | OR6A2  | 11 | 6773354 | 3 | 0.349219 |
| rs866347   | OR6A2  | 11 | 6773354 | 6 | 0.698662 |
| rs7926083  | OR10A2 | 11 | 6848334 | 4 | 1.458412 |
| rs7926083  | OR10A2 | 11 | 6848334 | 7 | 0.284406 |
| rs7926083  | OR10A2 | 11 | 6848334 | 3 | 0.451689 |
| rs10839635 | OR10A4 | 11 | 6855239 | 5 | 3.61059  |
| rs10839635 | OR10A4 | 11 | 6855239 | 6 | 0.908987 |
| rs10839635 | OR10A4 | 11 | 6855239 | 2 | 3.132854 |
| rs7102808  | OR10A4 | 11 | 6855334 | 4 | 0.949499 |
| rs7102808  | OR10A4 | 11 | 6855334 | 3 | 0.930789 |
| rs7102808  | OR10A4 | 11 | 6855334 | 6 | 0.815507 |
| rs2741804  | OR2D2  | 11 | 6869703 | 6 | 2.037151 |
| rs2741804  | OR2D2  | 11 | 6869703 | 5 | 1.135274 |
| rs1965209  | OR2D2  | 11 | 6869866 | 4 | 0.681615 |
| rs1965209  | OR2D2  | 11 | 6869866 | 6 | 4.139277 |
| rs1965209  | OR2D2  | 11 | 6869866 | 3 | 0.842335 |
| rs10839659 | OR2D3  | 11 | 6899302 | 1 | 6.281151 |
| rs10839659 | OR2D3  | 11 | 6899302 | 7 | 0.495402 |
| rs10839659 | OR2D3  | 11 | 6899302 | 3 | 0.22929  |
| rs10839659 | OR2D3  | 11 | 6899302 | 8 | 0.818266 |
| rs1466682  | ZNF215 | 11 | 6904337 | 6 | 0.728761 |
| rs1466682  | ZNF215 | 11 | 6904337 | 1 | 0.389753 |
| rs1466682  | ZNF215 | 11 | 6904337 | 2 | 7.568447 |
| rs1466682  | ZNF215 | 11 | 6904337 | 7 | 0.0416   |
| rs2239731  | ZNF215 | 11 | 6933564 | 1 | 6.378442 |
| rs2239731  | ZNF215 | 11 | 6933564 | 5 | 4.431909 |
| rs2239731  | ZNF215 | 11 | 6933564 | 6 | 0.507128 |
| rs2239730  | ZNF215 | 11 | 6933751 | 5 | 0.363664 |
| rs2239730  | ZNF215 | 11 | 6933751 | 8 | 4.752633 |
| rs2239730  | ZNF215 | 11 | 6933751 | 6 | 6.665671 |
| rs2239730  | ZNF215 | 11 | 6933751 | 1 | 5.750574 |
| rs2638096  | ZNF215 | 11 | 6934492 | 5 | 0.275501 |
| rs2638096  | ZNF215 | 11 | 6934492 | 8 | 4.289837 |

|               |         |    |         |   |          |
|---------------|---------|----|---------|---|----------|
| rs2638096     | ZNF215  | 11 | 6934492 | 1 | 5.26647  |
| rs2638096     | ZNF215  | 11 | 6934492 | 6 | 5.531185 |
| rs1156525     | ZNF214  | 11 | 6979107 | 5 | 0.206196 |
| rs1156525     | ZNF214  | 11 | 6979107 | 4 | 1.521547 |
| rs1156525     | ZNF214  | 11 | 6979107 | 8 | 0.005066 |
| rs1156525     | ZNF214  | 11 | 6979107 | 1 | 0.149722 |
| rs1156525     | ZNF214  | 11 | 6979107 | 2 | 2.443158 |
| rs1156525     | ZNF214  | 11 | 6979107 | 3 | 0.016291 |
| rs1156526     | ZNF214  | 11 | 6979293 | 5 | 0.500755 |
| rs1156526     | ZNF214  | 11 | 6979293 | 3 | 0.804578 |
| rs1156526     | ZNF214  | 11 | 6979293 | 8 | 0.713869 |
| rs1156526     | ZNF214  | 11 | 6979293 | 1 | 0.094785 |
| rs1156526     | ZNF214  | 11 | 6979293 | 4 | 1.059319 |
| SNP11-7016557 | NLRP14  | 11 | 7016557 | 4 | 3.987681 |
| SNP11-7016557 | NLRP14  | 11 | 7016557 | 1 | 0.08272  |
| SNP11-7016557 | NLRP14  | 11 | 7016557 | 3 | 0.219276 |
| rs10839708    | NLRP14  | 11 | 7035614 | 5 | 0.618304 |
| rs10839708    | NLRP14  | 11 | 7035614 | 2 | 1.375424 |
| rs10839708    | NLRP14  | 11 | 7035614 | 3 | 1.084493 |
| rs10839708    | NLRP14  | 11 | 7035614 | 1 | 1.91211  |
| rs17280682    | NLRP14  | 11 | 7048145 | 4 | 0.367391 |
| rs17280682    | NLRP14  | 11 | 7048145 | 3 | 1.293468 |
| rs17280682    | NLRP14  | 11 | 7048145 | 2 | 0.905476 |
| rs17280682    | NLRP14  | 11 | 7048145 | 8 | 0.030632 |
| rs17280682    | NLRP14  | 11 | 7048145 | 5 | 0.001144 |
| rs17280682    | NLRP14  | 11 | 7048145 | 1 | 0.408412 |
| rs4344466     | SYT9    | 11 | 7444917 | 5 | 0.410292 |
| rs4344466     | SYT9    | 11 | 7444917 | 4 | 2.014573 |
| rs10732509    | SYT9    | 11 | 7445448 | 1 | 0.579528 |
| rs10732509    | SYT9    | 11 | 7445448 | 4 | 0.675618 |
| rs10732510    | SYT9    | 11 | 7445503 | 1 | 2.123441 |
| rs10732510    | SYT9    | 11 | 7445503 | 4 | 0.470734 |
| rs10732510    | SYT9    | 11 | 7445503 | 2 | 0.722026 |
| rs10732510    | SYT9    | 11 | 7445503 | 8 | 0.790181 |
| rs4408288     | SYT9    | 11 | 7446016 | 4 | 0.886528 |
| rs4408288     | SYT9    | 11 | 7446016 | 2 | 3.182616 |
| rs4408288     | SYT9    | 11 | 7446016 | 5 | 1.297877 |
| rs4351800     | SYT9    | 11 | 7446395 | 1 | 5.397428 |
| rs4351800     | SYT9    | 11 | 7446395 | 4 | 0.088685 |
| rs12803046    | OLFML1  | 11 | 7487561 | 1 | 3.102233 |
| rs3884596     | OLFML1  | 11 | 7488751 | 3 | 8.325927 |
| rs3884596     | OLFML1  | 11 | 7488751 | 8 | 2.934689 |
| rs3884596     | OLFML1  | 11 | 7488751 | 7 | 0.381676 |
| rs11041490    | PPFIBP2 | 11 | 7613385 | 1 | 0.650744 |
| rs11041490    | PPFIBP2 | 11 | 7613385 | 6 | 0.409424 |
| rs945888      | CYB5R2  | 11 | 7651338 | 3 | 0.659819 |
| rs4509745     | OVCH2   | 11 | 7669047 | 3 | 1.145745 |

|               |        |    |         |   |          |
|---------------|--------|----|---------|---|----------|
| rs4509745     | OVCH2  | 11 | 7669047 | 1 | 3.12875  |
| rs4509745     | OVCH2  | 11 | 7669047 | 4 | 0.500355 |
| rs4633461     | OVCH2  | 11 | 7669099 | 3 | 0.593223 |
| SNP11-7678550 | OVCH2  | 11 | 7678550 | 3 | 0.901111 |
| rs1482791     | OR5P3  | 11 | 7803784 | 5 | 1.381464 |
| rs1482791     | OR5P3  | 11 | 7803784 | 7 | 0.538887 |
| rs1482791     | OR5P3  | 11 | 7803784 | 4 | 0.636886 |
| rs1482791     | OR5P3  | 11 | 7803784 | 6 | 0.573821 |
| rs4758258     | OR10A6 | 11 | 7905926 | 7 | 0.309195 |
| rs12363522    | NLRP10 | 11 | 7938670 | 3 | 0.426028 |
| rs17847539    | TUB    | 11 | 8017807 | 2 | 1.630009 |
| rs17323959    | TUB    | 11 | 8081804 | 4 | 3.160434 |
| rs4758291     | TUB    | 11 | 8081870 | 5 | 0.97797  |
| rs11041742    | TUB    | 11 | 8083499 | 3 | 0.383331 |
| rs11041742    | TUB    | 11 | 8083499 | 8 | 4.278822 |
| rs11041742    | TUB    | 11 | 8083499 | 6 | 1.043592 |
| rs1055233     | TUB    | 11 | 8084071 | 6 | 0.653225 |
| SNP11-8116419 | RIC3   | 11 | 8116419 | 5 | 0.744386 |
| SNP11-8116419 | RIC3   | 11 | 8116419 | 3 | 0.2233   |
| SNP11-8116433 | RIC3   | 11 | 8116433 | 5 | 0.353327 |
| rs1042359     | LMO1   | 11 | 8202757 | 4 | 0.234241 |
| rs3750952     | LMO1   | 11 | 8208497 | 8 | 0.248225 |
| rs3750952     | LMO1   | 11 | 8208497 | 2 | 0.408056 |
| rs3750952     | LMO1   | 11 | 8208497 | 4 | 0.575774 |
| rs7934876     | STK33  | 11 | 8370177 | 7 | 0.858522 |
| rs7934876     | STK33  | 11 | 8370177 | 4 | 0.034831 |
| rs7934876     | STK33  | 11 | 8370177 | 3 | 0.085833 |
| rs7934876     | STK33  | 11 | 8370177 | 2 | 1.736324 |
| rs35296353    | STK33  | 11 | 8370805 | 3 | 0.719458 |
| rs3751096     | STK33  | 11 | 8391654 | 8 | 4.757671 |
| rs3751096     | STK33  | 11 | 8391654 | 2 | 1.237849 |
| rs3751096     | STK33  | 11 | 8391654 | 1 | 0.245421 |
| rs3751096     | STK33  | 11 | 8391654 | 7 | 0.655153 |
| rs3751096     | STK33  | 11 | 8391654 | 4 | 1.751855 |
| rs1446464     | STK33  | 11 | 8442886 | 8 | 5.097145 |
| rs1446464     | STK33  | 11 | 8442886 | 7 | 0.821686 |
| rs1446464     | STK33  | 11 | 8442886 | 1 | 0.596378 |
| rs1446464     | STK33  | 11 | 8442886 | 3 | 0.924542 |
| rs2289923     | STK33  | 11 | 8453092 | 7 | 1.068995 |
| rs2289923     | STK33  | 11 | 8453092 | 1 | 1.81961  |
| rs2289923     | STK33  | 11 | 8453092 | 8 | 1.735323 |
| rs2289923     | STK33  | 11 | 8453092 | 3 | 0.743044 |
| rs2289921     | STK33  | 11 | 8453187 | 8 | 1.92435  |
| rs2289921     | STK33  | 11 | 8453187 | 2 | 1.725431 |
| rs2289921     | STK33  | 11 | 8453187 | 7 | 0.025528 |
| rs2289921     | STK33  | 11 | 8453187 | 1 | 0.519359 |
| rs2073687     | RPL27A | 11 | 8663809 | 1 | 4.040846 |

|            |           |    |          |   |          |
|------------|-----------|----|----------|---|----------|
| rs10840112 | RPL27A    | 11 | 8667087  | 1 | 0.599966 |
| rs3812762  | ST5       | 11 | 8708216  | 4 | 0.014835 |
| rs3812762  | ST5       | 11 | 8708216  | 6 | 0.572672 |
| rs3812762  | ST5       | 11 | 8708216  | 7 | 0.395267 |
| rs3812762  | ST5       | 11 | 8708216  | 8 | 7.738828 |
| rs3794153  | ST5       | 11 | 8708465  | 6 | 3.776795 |
| rs3794153  | ST5       | 11 | 8708465  | 3 | 0.027023 |
| rs3794153  | ST5       | 11 | 8708465  | 4 | 0.133543 |
| rs2653601  | C11orf16  | 11 | 8899518  | 2 | 0.072859 |
| rs2653601  | C11orf16  | 11 | 8899518  | 4 | 0.5889   |
| rs2653601  | C11orf16  | 11 | 8899518  | 1 | 0.621014 |
| rs2653601  | C11orf16  | 11 | 8899518  | 7 | 0.032619 |
| rs11042127 | C11orf16  | 11 | 8904162  | 7 | 0.921435 |
| rs11042127 | C11orf16  | 11 | 8904162  | 3 | 0.184472 |
| rs1136966  | SCUBE2    | 11 | 8998907  | 7 | 1.421577 |
| rs1136966  | SCUBE2    | 11 | 8998907  | 2 | 1.908383 |
| rs1136966  | SCUBE2    | 11 | 8998907  | 1 | 1.807559 |
| rs1367     | SCUBE2    | 11 | 8999145  | 1 | 2.865658 |
| rs1367     | SCUBE2    | 11 | 8999145  | 7 | 0.086626 |
| rs3751057  | SCUBE2    | 11 | 9008051  | 1 | 2.465363 |
| rs3751057  | SCUBE2    | 11 | 9008051  | 7 | 0.055575 |
| rs3751055  | SCUBE2    | 11 | 9025622  | 3 | 0.654267 |
| rs3751055  | SCUBE2    | 11 | 9025622  | 8 | 0.62981  |
| GA009535   | TMEM41B   | 11 | 9292647  | 1 | 4.869978 |
| GA009535   | TMEM41B   | 11 | 9292647  | 6 | 3.812778 |
| rs4910052  | IPO7      | 11 | 9411950  | 3 | 0.140625 |
| rs7102464  | SBF2      | 11 | 9836414  | 5 | 0.27148  |
| rs899011   | AMPD3     | 11 | 10433474 | 6 | 1.10347  |
| rs899011   | AMPD3     | 11 | 10433474 | 2 | 1.014579 |
| rs899011   | AMPD3     | 11 | 10433474 | 1 | 0.225493 |
| rs899011   | AMPD3     | 11 | 10433474 | 8 | 3.577665 |
| rs899011   | AMPD3     | 11 | 10433474 | 5 | 1.569621 |
| rs11042836 | AMPD3     | 11 | 10460312 | 5 | 0.284748 |
| rs11042883 | MRVI1     | 11 | 10554247 | 4 | 0.139495 |
| rs11042883 | MRVI1     | 11 | 10554247 | 3 | 2.606328 |
| rs11042883 | MRVI1     | 11 | 10554247 | 6 | 1.091928 |
| rs2241489  | MRVI1     | 11 | 10604278 | 8 | 0.26683  |
| rs2241489  | MRVI1     | 11 | 10604278 | 3 | 0.821643 |
| rs2241489  | MRVI1     | 11 | 10604278 | 6 | 0.74107  |
| rs2278125  | MRVI1     | 11 | 10606905 | 7 | 0.679162 |
| rs2278125  | MRVI1     | 11 | 10606905 | 3 | 1.547627 |
| rs11345    | LOC729013 | 11 | 10856885 | 8 | 8.77733  |
| rs11345    | LOC729013 | 11 | 10856885 | 4 | 0.216755 |
| rs11345    | LOC729013 | 11 | 10856885 | 1 | 3.40103  |
| rs11345    | LOC729013 | 11 | 10856885 | 3 | 0.903917 |
| rs2270511  | MICAL2    | 11 | 12222118 | 3 | 0.976745 |
| rs2270511  | MICAL2    | 11 | 12222118 | 6 | 0.784308 |



|                |                |    |          |   |          |
|----------------|----------------|----|----------|---|----------|
| SNP11-12272218 | MICALCL        | 11 | 12272218 | 8 | 3.854443 |
| rs3812754      | MICALCL        | 11 | 12272965 | 4 | 0.025171 |
| rs10831923     | TEAD1          | 11 | 12917502 | 1 | 3.807469 |
| rs10831923     | TEAD1          | 11 | 12917502 | 8 | 0.672256 |
| rs10831923     | TEAD1          | 11 | 12917502 | 5 | 0.098432 |
| rs10831923     | TEAD1          | 11 | 12917502 | 4 | 0.210044 |
| rs16911836     | TEAD1          | 11 | 12918836 | 5 | 8.458844 |
| rs16911836     | TEAD1          | 11 | 12918836 | 4 | 0.076026 |
| rs16911836     | TEAD1          | 11 | 12918836 | 2 | 6.88853  |
| rs1507535      | LOC729147      | 11 | 13816574 | 3 | 0.008164 |
| rs12794714     | CYP2R1         | 11 | 14870151 | 7 | 0.584166 |
| rs12794714     | CYP2R1         | 11 | 14870151 | 2 | 5.801785 |
| rs12794714     | CYP2R1         | 11 | 14870151 | 8 | 0.663292 |
| rs12794714     | CYP2R1         | 11 | 14870151 | 5 | 0.066018 |
| rs12274674     | CALCB          | 11 | 15056271 | 8 | 1.263    |
| rs12274674     | CALCB          | 11 | 15056271 | 3 | 0.155905 |
| rs12274674     | CALCB          | 11 | 15056271 | 4 | 0.249672 |
| rs3928         | CALCB          | 11 | 15056472 | 4 | 2.710559 |
| rs3928         | CALCB          | 11 | 15056472 | 3 | 0.116239 |
| rs3928         | CALCB          | 11 | 15056472 | 8 | 1.626436 |
| rs1054952      | INSC           | 11 | 15224173 | 1 | 0.090512 |
| rs1054952      | INSC           | 11 | 15224173 | 7 | 3.415253 |
| rs1054952      | INSC           | 11 | 15224173 | 4 | 0.156428 |
| rs1054952      | INSC           | 11 | 15224173 | 8 | 0.60952  |
| rs1054952      | INSC           | 11 | 15224173 | 2 | 1.102103 |
| rs1054952      | INSC           | 11 | 15224173 | 5 | 2.641915 |
| rs10832616     | AKR1B1P3       | 11 | 16462666 | 1 | 0.123462 |
| rs1846936      | C11orf58       | 11 | 16716820 | 1 | 0.51648  |
| rs1846936      | C11orf58       | 11 | 16716820 | 8 | 1.547741 |
| rs1846936      | C11orf58       | 11 | 16716820 | 2 | 0.278916 |
| rs217750       | PLEKHA7        | 11 | 16794364 | 4 | 0.097498 |
| rs217750       | PLEKHA7        | 11 | 16794364 | 3 | 0.717589 |
| rs217750       | PLEKHA7        | 11 | 16794364 | 8 | 5.285807 |
| rs214087       | NUCB2          | 11 | 17254941 | 7 | 4.408206 |
| rs214087       | NUCB2          | 11 | 17254941 | 6 | 0.479255 |
| rs10832778     | DKFZp686O24166 | 11 | 17350649 | 3 | 0.042308 |
| rs10832778     | DKFZp686O24166 | 11 | 17350649 | 2 | 4.017969 |
| rs10832778     | DKFZp686O24166 | 11 | 17350649 | 8 | 0.244177 |
| rs10832778     | DKFZp686O24166 | 11 | 17350649 | 6 | 0.025871 |
| rs10832781     | DKFZp686O24166 | 11 | 17353093 | 3 | 0.053375 |
| rs10832781     | DKFZp686O24166 | 11 | 17353093 | 6 | 2.299007 |
| rs10832782     | DKFZp686O24166 | 11 | 17353849 | 2 | 1.891096 |
| rs10832782     | DKFZp686O24166 | 11 | 17353849 | 3 | 0.659811 |
| rs10832782     | DKFZp686O24166 | 11 | 17353849 | 7 | 0.068008 |
| rs2285676      | KCNJ11         | 11 | 17364601 | 3 | 0.402495 |
| rs2285676      | KCNJ11         | 11 | 17364601 | 6 | 1.748121 |
| rs5213         | KCNJ11         | 11 | 17364980 | 8 | 1.134841 |

|                |           |    |          |   |          |
|----------------|-----------|----|----------|---|----------|
| rs5213         | KCNJ11    | 11 | 17364980 | 2 | 1.163464 |
| rs5213         | KCNJ11    | 11 | 17364980 | 3 | 1.232631 |
| rs5213         | KCNJ11    | 11 | 17364980 | 6 | 1.345017 |
| rs5215         | KCNJ11    | 11 | 17365206 | 2 | 0.374497 |
| rs5215         | KCNJ11    | 11 | 17365206 | 3 | 1.417716 |
| rs5215         | KCNJ11    | 11 | 17365206 | 6 | 0.659751 |
| rs1800467      | KCNJ11    | 11 | 17365407 | 1 | 4.295188 |
| rs5219         | KCNJ11    | 11 | 17366148 | 3 | 0.557438 |
| rs5219         | KCNJ11    | 11 | 17366148 | 6 | 1.051372 |
| rs757110       | ABCC8     | 11 | 17375053 | 2 | 4.731425 |
| rs757110       | ABCC8     | 11 | 17375053 | 6 | 0.900145 |
| rs757110       | ABCC8     | 11 | 17375053 | 3 | 2.314725 |
| rs1799857      | ABCC8     | 11 | 17409068 | 1 | 0.527045 |
| rs1799857      | ABCC8     | 11 | 17409068 | 3 | 0.633267 |
| rs1799857      | ABCC8     | 11 | 17409068 | 5 | 0.026847 |
| rs1055581      | USH1C     | 11 | 17472244 | 7 | 1.576072 |
| rs1055581      | USH1C     | 11 | 17472244 | 5 | 0.308158 |
| rs1055577      | USH1C     | 11 | 17472269 | 3 | 0.547971 |
| rs1055577      | USH1C     | 11 | 17472269 | 5 | 1.56869  |
| rs1055577      | USH1C     | 11 | 17472269 | 7 | 1.267874 |
| rs1055577      | USH1C     | 11 | 17472269 | 1 | 0.902046 |
| rs1055574      | USH1C     | 11 | 17472409 | 3 | 1.036811 |
| rs1055574      | USH1C     | 11 | 17472409 | 2 | 1.453384 |
| rs1055574      | USH1C     | 11 | 17472409 | 1 | 1.220471 |
| rs1055574      | USH1C     | 11 | 17472409 | 7 | 1.339119 |
| rs1055574      | USH1C     | 11 | 17472409 | 5 | 0.236008 |
| rs1064074      | USH1C     | 11 | 17476318 | 4 | 2.233808 |
| rs1064074      | USH1C     | 11 | 17476318 | 2 | 3.219271 |
| rs1064074      | USH1C     | 11 | 17476318 | 8 | 1.877851 |
| rs11024333     | OTOG      | 11 | 17571779 | 7 | 0.950985 |
| rs875696       | OTOG      | 11 | 17571825 | 8 | 4.380358 |
| rs10832824     | OTOG      | 11 | 17620020 | 2 | 2.463209 |
| rs10832824     | OTOG      | 11 | 17620020 | 5 | 1.773493 |
| SNP11-18065088 | SAAL1     | 11 | 18065088 | 7 | 0.150657 |
| rs11024532     | MRGPRX4   | 11 | 18151924 | 8 | 3.342091 |
| rs11024532     | MRGPRX4   | 11 | 18151924 | 6 | 2.986614 |
| rs7936382      | LOC645312 | 11 | 18167390 | 8 | 5.204717 |
| rs7936382      | LOC645312 | 11 | 18167390 | 6 | 5.1409   |
| rs16935005     | LOC645319 | 11 | 18175254 | 5 | 0.19855  |
| rs4757627      | LOC494141 | 11 | 18187865 | 1 | 5.404602 |
| rs4757627      | LOC494141 | 11 | 18187865 | 8 | 2.363653 |
| rs10741739     | HPS5      | 11 | 18284260 | 5 | 0.37918  |
| rs10741739     | HPS5      | 11 | 18284260 | 6 | 0.801592 |
| rs10741739     | HPS5      | 11 | 18284260 | 3 | 0.922609 |
| rs10741739     | HPS5      | 11 | 18284260 | 4 | 2.761734 |
| rs4150530      | HPS5      | 11 | 18300270 | 6 | 0.293725 |
| SNP11-18590473 | SPTY2D1   | 11 | 18590473 | 2 | 1.89772  |

|                |           |    |          |   |          |
|----------------|-----------|----|----------|---|----------|
| rs16935599     | SPTY2D1   | 11 | 18593057 | 7 | 3.480217 |
| SNP11-18694905 | IGSF22    | 11 | 18694905 | 8 | 0.182446 |
| SNP11-18694905 | IGSF22    | 11 | 18694905 | 6 | 3.161385 |
| rs1550870      | PTPN5     | 11 | 18707617 | 5 | 0.172596 |
| rs1550870      | PTPN5     | 11 | 18707617 | 8 | 0.995089 |
| rs7946550      | LOC390101 | 11 | 18950041 | 8 | 0.022603 |
| rs7946550      | LOC390101 | 11 | 18950041 | 5 | 0.28264  |
| rs7126647      | MRGPRX2   | 11 | 19033193 | 4 | 1.360798 |
| rs7126647      | MRGPRX2   | 11 | 19033193 | 7 | 1.962096 |
| rs7126647      | MRGPRX2   | 11 | 19033193 | 3 | 1.082152 |
| rs7126647      | MRGPRX2   | 11 | 19033193 | 5 | 1.777463 |
| rs7126647      | MRGPRX2   | 11 | 19033193 | 8 | 1.549051 |
| rs7126647      | MRGPRX2   | 11 | 19033193 | 6 | 0.59488  |
| rs7112398      | MRGPRX2   | 11 | 19033234 | 4 | 2.041522 |
| rs7112398      | MRGPRX2   | 11 | 19033234 | 7 | 3.287447 |
| rs7112398      | MRGPRX2   | 11 | 19033234 | 3 | 2.27968  |
| rs4757028      | NAV2      | 11 | 20055688 | 1 | 6.010008 |
| rs4757028      | NAV2      | 11 | 20055688 | 7 | 0.345687 |
| rs6483642      | NAV2      | 11 | 20056117 | 7 | 0.049725 |
| rs1443547      | SLC6A5    | 11 | 20579551 | 5 | 3.390584 |
| rs8176789      | NELL1     | 11 | 21538381 | 4 | 0.894587 |
| rs8176789      | NELL1     | 11 | 21538381 | 3 | 0.814264 |
| rs4312063      | TMEM16E   | 11 | 22199305 | 8 | 0.861589 |
| rs4312063      | TMEM16E   | 11 | 22199305 | 1 | 5.194271 |
| rs4312063      | TMEM16E   | 11 | 22199305 | 7 | 0.380956 |
| rs4312063      | TMEM16E   | 11 | 22199305 | 5 | 0.799916 |
| rs7481951      | TMEM16E   | 11 | 22228446 | 7 | 1.265362 |
| rs7481951      | TMEM16E   | 11 | 22228446 | 1 | 5.883161 |
| rs7481951      | TMEM16E   | 11 | 22228446 | 5 | 1.532943 |
| rs7481951      | TMEM16E   | 11 | 22228446 | 3 | 0.538408 |
| rs922571       | GAS2      | 11 | 22653027 | 8 | 2.194843 |
| rs922571       | GAS2      | 11 | 22653027 | 2 | 1.761626 |
| rs922571       | GAS2      | 11 | 22653027 | 3 | 1.353656 |
| rs2302423      | LOC645581 | 11 | 22825513 | 2 | 1.229378 |
| rs3213706      | LOC645581 | 11 | 22837578 | 2 | 0.786855 |
| rs3213706      | LOC645581 | 11 | 22837578 | 4 | 0.678642 |
| rs3213706      | LOC645581 | 11 | 22837578 | 5 | 0.246993 |
| rs10500994     | LUZP2     | 11 | 25056805 | 5 | 1.022968 |
| rs10500994     | LUZP2     | 11 | 25056805 | 3 | 1.196365 |
| rs1531394      | TMEM16C   | 11 | 26310219 | 3 | 0.005094 |
| rs1531394      | TMEM16C   | 11 | 26310219 | 4 | 0.154594 |
| rs7946841      | TMEM16C   | 11 | 26613139 | 8 | 6.124429 |
| rs7946841      | TMEM16C   | 11 | 26613139 | 5 | 0.089149 |
| rs7946841      | TMEM16C   | 11 | 26613139 | 2 | 2.652635 |
| rs3802753      | TMEM16C   | 11 | 26638963 | 6 | 1.64696  |
| rs3802754      | TMEM16C   | 11 | 26639010 | 4 | 0.461726 |
| rs3802754      | TMEM16C   | 11 | 26639010 | 6 | 1.386574 |

|            |           |    |          |   |          |
|------------|-----------|----|----------|---|----------|
| rs3802754  | TMEM16C   | 11 | 26639010 | 3 | 0.652408 |
| rs3802754  | TMEM16C   | 11 | 26639010 | 5 | 0.976748 |
| rs3802755  | TMEM16C   | 11 | 26639410 | 4 | 0.198256 |
| rs3802755  | TMEM16C   | 11 | 26639410 | 3 | 0.515558 |
| rs2305095  | BBOX1     | 11 | 27033553 | 8 | 9.481888 |
| rs10734392 | CCDC34    | 11 | 27328116 | 3 | 0.001245 |
| rs10734392 | CCDC34    | 11 | 27328116 | 8 | 1.254298 |
| rs10734392 | CCDC34    | 11 | 27328116 | 1 | 5.787271 |
| rs10734392 | CCDC34    | 11 | 27328116 | 5 | 0.738859 |
| rs7124442  | BDNF      | 11 | 27633617 | 2 | 0.197017 |
| rs7124442  | BDNF      | 11 | 27633617 | 1 | 0.767806 |
| rs7124442  | BDNF      | 11 | 27633617 | 4 | 0.685389 |
| rs7124442  | BDNF      | 11 | 27633617 | 8 | 0.145176 |
| rs6265     | BDNFOS    | 11 | 27636492 | 3 | 0.660499 |
| rs2726836  | HSP90AA2  | 11 | 27868222 | 5 | 1.828406 |
| rs11821836 | LOC645846 | 11 | 29704373 | 3 | 3.252292 |
| rs506197   | FSHB      | 11 | 30212399 | 4 | 1.857264 |
| rs506197   | FSHB      | 11 | 30212399 | 3 | 1.726159 |
| rs506306   | FSHB      | 11 | 30212443 | 3 | 2.620348 |
| rs676349   | FSHB      | 11 | 30212558 | 3 | 0.796025 |
| rs13642    | MPPED2    | 11 | 30388796 | 3 | 1.248094 |
| rs2616815  | DCDC1     | 11 | 31283892 | 4 | 0.35929  |
| rs2616815  | DCDC1     | 11 | 31283892 | 1 | 3.429065 |
| rs5030317  | WT1       | 11 | 32366913 | 3 | 1.750401 |
| rs5030317  | WT1       | 11 | 32366913 | 1 | 1.777966 |
| rs5030317  | WT1       | 11 | 32366913 | 2 | 0.323069 |
| rs16754    | WT1       | 11 | 32374521 | 1 | 0.487137 |
| rs7946086  | WIT1      | 11 | 32417666 | 8 | 5.448214 |
| rs966191   | DEPDC7    | 11 | 33009683 | 4 | 6.298993 |
| rs966191   | DEPDC7    | 11 | 33009683 | 1 | 6.409074 |
| rs966191   | DEPDC7    | 11 | 33009683 | 3 | 0.834717 |
| rs966191   | DEPDC7    | 11 | 33009683 | 8 | 2.272487 |
| rs12420931 | CD59      | 11 | 33682725 | 1 | 5.100543 |
| rs11032349 | CD59      | 11 | 33686248 | 3 | 0.173802 |
| rs3740616  | LMO2      | 11 | 33837472 | 7 | 0.909628 |
| rs3740616  | LMO2      | 11 | 33837472 | 5 | 0.224968 |
| rs3740616  | LMO2      | 11 | 33837472 | 3 | 7.690727 |
| rs3740617  | LMO2      | 11 | 33837592 | 5 | 0.687243 |
| rs3740617  | LMO2      | 11 | 33837592 | 6 | 0.085028 |
| rs3740617  | LMO2      | 11 | 33837592 | 8 | 3.076751 |
| rs2038602  | LMO2      | 11 | 33842870 | 7 | 0.526594 |
| rs2038602  | LMO2      | 11 | 33842870 | 5 | 0.279726 |
| rs2038602  | LMO2      | 11 | 33842870 | 2 | 1.882614 |
| rs2038602  | LMO2      | 11 | 33842870 | 6 | 0.327932 |
| rs1535719  | ELF5      | 11 | 34457142 | 1 | 5.680827 |
| rs1535719  | ELF5      | 11 | 34457142 | 6 | 5.648575 |
| rs1535719  | ELF5      | 11 | 34457142 | 4 | 0.147317 |

|                |               |    |          |   |          |
|----------------|---------------|----|----------|---|----------|
| rs10836251     | LOC729710     | 11 | 34491707 | 7 | 1.231914 |
| rs10836251     | LOC729710     | 11 | 34491707 | 1 | 5.284451 |
| rs10836251     | LOC729710     | 11 | 34491707 | 8 | 0.95105  |
| rs10836251     | LOC729710     | 11 | 34491707 | 3 | 0.156637 |
| rs286925       | EHF           | 11 | 34599244 | 7 | 1.533257 |
| rs286925       | EHF           | 11 | 34599244 | 4 | 0.261556 |
| rs2281910      | EHF           | 11 | 34624719 | 3 | 0.207741 |
| rs2281910      | EHF           | 11 | 34624719 | 1 | 0.676328 |
| rs2281910      | EHF           | 11 | 34624719 | 2 | 2.731853 |
| rs286891       | EHF           | 11 | 34636976 | 4 | 0.954142 |
| rs286891       | EHF           | 11 | 34636976 | 7 | 3.809829 |
| rs286887       | EHF           | 11 | 34639343 | 4 | 1.151766 |
| rs1977420      | APIP          | 11 | 34866973 | 3 | 1.242985 |
| SNP11-34873233 | APIP          | 11 | 34873233 | 2 | 3.453139 |
| SNP11-34873233 | APIP          | 11 | 34873233 | 6 | 1.50735  |
| rs497582       | PDHX          | 11 | 34948303 | 1 | 4.046098 |
| rs1071695      | CD44          | 11 | 35158418 | 3 | 1.020056 |
| rs1467558      | CD44          | 11 | 35186249 | 7 | 0.266037 |
| rs3088168      | SLC1A2        | 11 | 35229844 | 5 | 0.431624 |
| rs3088168      | SLC1A2        | 11 | 35229844 | 3 | 1.784399 |
| rs3088168      | SLC1A2        | 11 | 35229844 | 4 | 0.642733 |
| rs3088168      | SLC1A2        | 11 | 35229844 | 2 | 3.893641 |
| rs1043101      | SLC1A2        | 11 | 35231405 | 4 | 0.03772  |
| rs1043101      | SLC1A2        | 11 | 35231405 | 3 | 0.881209 |
| rs12360706     | SLC1A2        | 11 | 35232635 | 3 | 0.206268 |
| rs3829280      | SLC1A2        | 11 | 35233299 | 3 | 0.199692 |
| rs7936950      | SLC1A2        | 11 | 35235535 | 1 | 2.93175  |
| rs12294045     | SLC1A2        | 11 | 35235877 | 1 | 0.468822 |
| rs10768121     | SLC1A2        | 11 | 35236232 | 3 | 1.030794 |
| rs1042113      | SLC1A2        | 11 | 35264945 | 3 | 0.235579 |
| rs7767         | DKFZP586H2123 | 11 | 35410295 | 6 | 3.723764 |
| rs7767         | DKFZP586H2123 | 11 | 35410295 | 3 | 0.945905 |
| rs7767         | DKFZP586H2123 | 11 | 35410295 | 5 | 1.740384 |
| rs16927500     | DKFZP586H2123 | 11 | 35448927 | 2 | 2.447345 |
| rs597254       | TRIM44        | 11 | 35785579 | 1 | 4.628731 |
| rs597254       | TRIM44        | 11 | 35785579 | 6 | 7.288165 |
| rs597254       | TRIM44        | 11 | 35785579 | 5 | 0.013823 |
| rs597254       | TRIM44        | 11 | 35785579 | 4 | 1.124137 |
| rs2422249      | C11orf55      | 11 | 36247836 | 6 | 1.302586 |
| rs2422249      | C11orf55      | 11 | 36247836 | 2 | 4.232011 |
| rs4756305      | C11orf55      | 11 | 36248641 | 1 | 0.312705 |
| rs4756305      | C11orf55      | 11 | 36248641 | 8 | 0.502584 |
| rs4756305      | C11orf55      | 11 | 36248641 | 2 | 0.07171  |
| rs4756305      | C11orf55      | 11 | 36248641 | 6 | 0.349135 |
| rs7107433      | C11orf55      | 11 | 36249624 | 2 | 3.224941 |
| rs7107433      | C11orf55      | 11 | 36249624 | 6 | 0.681331 |
| rs7107433      | C11orf55      | 11 | 36249624 | 3 | 1.077096 |

|                |           |    |          |   |          |
|----------------|-----------|----|----------|---|----------|
| rs3740958      | FLJ14213  | 11 | 36429376 | 8 | 2.812225 |
| rs331439       | FLJ14213  | 11 | 36441921 | 6 | 0.300538 |
| rs331439       | FLJ14213  | 11 | 36441921 | 7 | 2.764344 |
| rs331436       | FLJ14213  | 11 | 36442640 | 6 | 1.276525 |
| rs331436       | FLJ14213  | 11 | 36442640 | 3 | 0.257734 |
| rs331436       | FLJ14213  | 11 | 36442640 | 7 | 3.992675 |
| rs331436       | FLJ14213  | 11 | 36442640 | 1 | 5.355266 |
| rs3740955      | RAG1      | 11 | 36552176 | 7 | 0.755234 |
| rs3740955      | RAG1      | 11 | 36552176 | 3 | 1.201144 |
| rs3740955      | RAG1      | 11 | 36552176 | 2 | 2.097845 |
| rs3740955      | RAG1      | 11 | 36552176 | 5 | 0.709376 |
| rs3740955      | RAG1      | 11 | 36552176 | 6 | 0.759583 |
| rs2227973      | RAG1      | 11 | 36553889 | 2 | 2.66608  |
| rs4151044      | RAG1      | 11 | 36556540 | 5 | 0.196595 |
| rs4151044      | RAG1      | 11 | 36556540 | 3 | 0.019917 |
| rs1056403      | RAG1      | 11 | 36557746 | 5 | 0.087551 |
| rs1056403      | RAG1      | 11 | 36557746 | 6 | 2.910781 |
| rs1056403      | RAG1      | 11 | 36557746 | 3 | 0.167384 |
| rs1056403      | RAG1      | 11 | 36557746 | 7 | 1.063068 |
| rs1056403      | RAG1      | 11 | 36557746 | 2 | 0.918839 |
| rs3740957      | C11orf74  | 11 | 36572688 | 5 | 0.340492 |
| rs3740957      | C11orf74  | 11 | 36572688 | 3 | 0.064925 |
| rs6485450      | LOC729798 | 11 | 43696998 | 7 | 1.687687 |
| rs11555762     | HSD17B12  | 11 | 43833274 | 6 | 2.991419 |
| rs12799548     | ALKBH3    | 11 | 43859196 | 1 | 5.610402 |
| rs2460130      | LOC729799 | 11 | 43876270 | 3 | 1.260579 |
| rs2460130      | LOC729799 | 11 | 43876270 | 2 | 5.348457 |
| rs2460130      | LOC729799 | 11 | 43876270 | 7 | 2.160549 |
| rs2460130      | LOC729799 | 11 | 43876270 | 6 | 4.191957 |
| rs2460130      | LOC729799 | 11 | 43876270 | 5 | 4.156013 |
| rs2460131      | LOC729799 | 11 | 43876362 | 3 | 0.656224 |
| rs2460131      | LOC729799 | 11 | 43876362 | 7 | 3.103609 |
| rs2460131      | LOC729799 | 11 | 43876362 | 2 | 5.410533 |
| rs2460131      | LOC729799 | 11 | 43876362 | 6 | 4.332522 |
| rs2460131      | LOC729799 | 11 | 43876362 | 8 | 10.72282 |
| rs1973717      | LOC387763 | 11 | 43903543 | 3 | 0.742319 |
| SNP11-44045928 | ACCS      | 11 | 44045928 | 4 | 1.176439 |
| rs7950395      | PHACS     | 11 | 44057694 | 2 | 3.591768 |
| rs10458911     | EXT2      | 11 | 44073678 | 4 | 0.483144 |
| rs10458911     | EXT2      | 11 | 44073678 | 5 | 0.080062 |
| rs10458911     | EXT2      | 11 | 44073678 | 1 | 0.405085 |
| rs4755798      | ALX4      | 11 | 44242752 | 7 | 3.583194 |
| rs3802805      | ALX4      | 11 | 44243142 | 3 | 0.653803 |
| rs12419361     | ALX4      | 11 | 44245647 | 7 | 0.855496 |
| rs12802362     | TSPAN18   | 11 | 44838573 | 1 | 5.058187 |
| rs860694       | TSPAN18   | 11 | 44908193 | 1 | 0.086396 |
| rs860694       | TSPAN18   | 11 | 44908193 | 3 | 0.274371 |

|                |          |    |          |   |          |
|----------------|----------|----|----------|---|----------|
| rs860694       | TSPAN18  | 11 | 44908193 | 4 | 0.705394 |
| rs2911         | TSPAN18  | 11 | 44908407 | 8 | 1.366774 |
| rs2911         | TSPAN18  | 11 | 44908407 | 4 | 0.307054 |
| rs836001       | TSPAN18  | 11 | 44909245 | 2 | 3.871986 |
| rs1078931      | PRDM11   | 11 | 45160424 | 7 | 0.425633 |
| rs1078931      | PRDM11   | 11 | 45160424 | 6 | 1.095488 |
| rs1078931      | PRDM11   | 11 | 45160424 | 1 | 3.726369 |
| rs3740784      | PRDM11   | 11 | 45203146 | 2 | 1.653695 |
| rs3740784      | PRDM11   | 11 | 45203146 | 3 | 0.202954 |
| rs3740784      | PRDM11   | 11 | 45203146 | 4 | 2.697547 |
| rs714215       | PRDM11   | 11 | 45203445 | 7 | 0.052886 |
| rs714215       | PRDM11   | 11 | 45203445 | 1 | 1.072847 |
| rs714215       | PRDM11   | 11 | 45203445 | 3 | 0.810294 |
| rs8929         | SYT13    | 11 | 45218702 | 3 | 0.019943 |
| rs2863173      | SYT13    | 11 | 45218818 | 3 | 0.141831 |
| rs2902427      | SYT13    | 11 | 45218832 | 3 | 0.599478 |
| rs2902427      | SYT13    | 11 | 45218832 | 5 | 0.27525  |
| rs2902427      | SYT13    | 11 | 45218832 | 2 | 1.290157 |
| rs6416129      | SYT13    | 11 | 45220270 | 5 | 0.719633 |
| rs4756026      | SLC35C1  | 11 | 45790536 | 2 | 3.188068 |
| rs4756026      | SLC35C1  | 11 | 45790536 | 4 | 6.321761 |
| rs4756026      | SLC35C1  | 11 | 45790536 | 6 | 0.063677 |
| rs7476         | CREB3L1  | 11 | 46299410 | 3 | 0.007807 |
| SNP11-46344444 | DGKZ     | 11 | 46344444 | 3 | 1.431118 |
| SNP11-46344444 | DGKZ     | 11 | 46344444 | 5 | 1.480078 |
| rs8914         | ARHGAP1  | 11 | 46655700 | 5 | 0.76027  |
| rs5898         | F2       | 11 | 46706224 | 1 | 0.558056 |
| rs5898         | F2       | 11 | 46706224 | 3 | 0.335196 |
| rs5898         | F2       | 11 | 46706224 | 4 | 0.549943 |
| rs3816614      | LRP4     | 11 | 46846741 | 3 | 0.140828 |
| rs3816614      | LRP4     | 11 | 46846741 | 1 | 0.253762 |
| rs6485702      | LRP4     | 11 | 46855347 | 3 | 0.393517 |
| rs6485702      | LRP4     | 11 | 46855347 | 5 | 0.832488 |
| rs6485702      | LRP4     | 11 | 46855347 | 8 | 0.71582  |
| rs6485702      | LRP4     | 11 | 46855347 | 1 | 1.033107 |
| SNP11-46872755 | LRP4     | 11 | 46872755 | 7 | 0.540765 |
| rs17787930     | C11orf49 | 11 | 46914875 | 4 | 3.41739  |
| rs17787930     | C11orf49 | 11 | 46914875 | 3 | 0.000519 |
| rs17787930     | C11orf49 | 11 | 46914875 | 1 | 0.742274 |
| rs17787930     | C11orf49 | 11 | 46914875 | 2 | 0.184209 |
| rs3740694      | C11orf49 | 11 | 47139502 | 1 | 0.690663 |
| rs3740694      | C11orf49 | 11 | 47139502 | 2 | 1.080492 |
| rs11039114     | C11orf49 | 11 | 47142256 | 6 | 3.265806 |
| rs11039114     | C11orf49 | 11 | 47142256 | 1 | 0.390112 |
| rs11039114     | C11orf49 | 11 | 47142256 | 2 | 0.369667 |
| rs2167079      | ACP2     | 11 | 47226831 | 4 | 0.837139 |
| rs2167079      | ACP2     | 11 | 47226831 | 5 | 0.054187 |

|                |          |    |          |   |          |
|----------------|----------|----|----------|---|----------|
| rs1449627      | MADD     | 11 | 47247560 | 5 | 0.261329 |
| rs1449627      | MADD     | 11 | 47247560 | 4 | 0.194015 |
| rs3736101      | MADD     | 11 | 47263204 | 4 | 4.93122  |
| SNP11-47263206 | MADD     | 11 | 47263206 | 5 | 2.443293 |
| rs11570058     | MYBPC3   | 11 | 47326019 | 5 | 0.38275  |
| SNP11-47388279 | SLC39A13 | 11 | 47388279 | 5 | 0.162123 |
| SNP11-47388279 | SLC39A13 | 11 | 47388279 | 4 | 0.327128 |
| rs7126210      | RAPSN    | 11 | 47416882 | 4 | 1.00419  |
| rs7111873      | RAPSN    | 11 | 47426015 | 4 | 1.224183 |
| rs7111873      | RAPSN    | 11 | 47426015 | 5 | 0.790667 |
| rs2280231      | KBTBD4   | 11 | 47557014 | 1 | 6.155967 |
| rs2280231      | KBTBD4   | 11 | 47557014 | 5 | 2.960969 |
| rs1064608      | MTCH2    | 11 | 47597005 | 8 | 7.976683 |
| rs1064608      | MTCH2    | 11 | 47597005 | 3 | 0.259035 |
| rs1064608      | MTCH2    | 11 | 47597005 | 2 | 8.830401 |
| rs1064608      | MTCH2    | 11 | 47597005 | 4 | 0.273365 |
| rs1064608      | MTCH2    | 11 | 47597005 | 1 | 0.645246 |
| rs1056387      | AGBL2    | 11 | 47637946 | 1 | 0.590492 |
| rs1056387      | AGBL2    | 11 | 47637946 | 2 | 0.279985 |
| rs1056387      | AGBL2    | 11 | 47637946 | 4 | 8.193455 |
| rs12286721     | AGBL2    | 11 | 47658104 | 4 | 0.193238 |
| rs12286721     | AGBL2    | 11 | 47658104 | 1 | 0.713682 |
| SNP11-47668789 | AGBL2    | 11 | 47668789 | 5 | 4.256341 |
| rs2270993      | PTPRJ    | 11 | 48101742 | 8 | 1.018025 |
| rs4752904      | PTPRJ    | 11 | 48122843 | 1 | 0.635753 |
| rs4752904      | PTPRJ    | 11 | 48122843 | 8 | 4.295466 |
| rs4752904      | PTPRJ    | 11 | 48122843 | 3 | 0.019961 |
| rs4752904      | PTPRJ    | 11 | 48122843 | 2 | 7.667586 |
| rs12790125     | OR4C15   | 11 | 55079115 | 1 | 0.195754 |
| rs557590       | OR4C16   | 11 | 55096405 | 3 | 0.129388 |
| rs557590       | OR4C16   | 11 | 55096405 | 2 | 1.230793 |
| rs11230600     | OR4C6    | 11 | 55189616 | 7 | 0.717087 |
| rs11230600     | OR4C6    | 11 | 55189616 | 1 | 1.798377 |
| rs297055       | OR5D14   | 11 | 55320476 | 2 | 0.570115 |
| rs297055       | OR5D14   | 11 | 55320476 | 5 | 0.679422 |
| rs297055       | OR5D14   | 11 | 55320476 | 7 | 0.742715 |
| rs297055       | OR5D14   | 11 | 55320476 | 3 | 0.447389 |
| rs12790505     | OR5L1    | 11 | 55336377 | 5 | 1.082312 |
| rs10791893     | OR5T2    | 11 | 55756979 | 5 | 0.401193 |
| rs10896290     | OR8J1    | 11 | 55884657 | 2 | 2.700131 |
| rs10896290     | OR8J1    | 11 | 55884657 | 7 | 1.58531  |
| rs10896290     | OR8J1    | 11 | 55884657 | 1 | 3.371258 |
| rs10896290     | OR8J1    | 11 | 55884657 | 5 | 3.965289 |
| rs10896290     | OR8J1    | 11 | 55884657 | 3 | 1.883709 |
| rs12788990     | OR8U8    | 11 | 55900000 | 5 | 0.334773 |
| rs10791961     | OR8U8    | 11 | 55900010 | 4 | 4.685716 |
| rs605734       | OR5M3    | 11 | 55994298 | 3 | 0.358167 |



|                |           |    |          |   |          |
|----------------|-----------|----|----------|---|----------|
| rs513873       | OR9G4     | 11 | 56267199 | 7 | 0.367001 |
| rs11820215     | LRRRC55   | 11 | 56712253 | 3 | 1.892536 |
| rs1124847      | LRRRC55   | 11 | 56712658 | 3 | 0.600908 |
| SNP11-56833396 | TNKS1BP1  | 11 | 56833396 | 6 | 6.139753 |
| SNP11-56837773 | TNKS1BP1  | 11 | 56837773 | 4 | 0.29338  |
| SNP11-56837773 | TNKS1BP1  | 11 | 56837773 | 2 | 4.965244 |
| SNP11-56837773 | TNKS1BP1  | 11 | 56837773 | 1 | 0.090335 |
| SNP11-56837773 | TNKS1BP1  | 11 | 56837773 | 3 | 0.031657 |
| rs2276038      | P2RX3     | 11 | 56894000 | 3 | 0.605519 |
| rs2276038      | P2RX3     | 11 | 56894000 | 5 | 0.06847  |
| SNP11-56902801 | PRG3      | 11 | 56902801 | 6 | 6.652679 |
| SNP11-56902801 | PRG3      | 11 | 56902801 | 1 | 0.917461 |
| rs28362944     | SERPING1  | 11 | 57122299 | 6 | 0.337176 |
| rs4926         | SERPING1  | 11 | 57138565 | 4 | 1.237485 |
| rs1783978      | ZDHHC5    | 11 | 57220076 | 6 | 1.24178  |
| rs1783978      | ZDHHC5    | 11 | 57220076 | 1 | 2.769892 |
| rs10896644     | CTNND1    | 11 | 57320567 | 1 | 2.644661 |
| rs708228       | CTNND1    | 11 | 57342238 | 8 | 5.765987 |
| rs708228       | CTNND1    | 11 | 57342238 | 4 | 0.368419 |
| rs708228       | CTNND1    | 11 | 57342238 | 6 | 6.393664 |
| rs921135       | OR6Q1     | 11 | 57555299 | 3 | 0.613759 |
| rs1966836      | OR1S1     | 11 | 57738805 | 7 | 0.672455 |
| rs11229410     | OR5B3     | 11 | 57926867 | 2 | 2.334175 |
| rs11229410     | OR5B3     | 11 | 57926867 | 4 | 2.204637 |
| rs11229410     | OR5B3     | 11 | 57926867 | 1 | 2.878853 |
| rs11229411     | OR5B3     | 11 | 57926918 | 1 | 3.649054 |
| rs11229411     | OR5B3     | 11 | 57926918 | 4 | 3.304897 |
| rs11229411     | OR5B3     | 11 | 57926918 | 2 | 4.194493 |
| rs4298923      | OR5B2     | 11 | 57946712 | 2 | 4.062878 |
| rs2515362      | CNTF      | 11 | 58149527 | 1 | 0.712448 |
| rs2515362      | CNTF      | 11 | 58149527 | 3 | 0.180171 |
| rs2515362      | CNTF      | 11 | 58149527 | 2 | 0.59181  |
| rs2515362      | CNTF      | 11 | 58149527 | 8 | 7.593804 |
| rs1938717      | LOC643589 | 11 | 58282640 | 3 | 0.069082 |
| rs1938717      | LOC643589 | 11 | 58282640 | 5 | 0.009964 |
| rs11229651     | GLYATL2   | 11 | 58358885 | 5 | 1.633057 |
| rs11229651     | GLYATL2   | 11 | 58358885 | 8 | 3.235779 |
| rs11229651     | GLYATL2   | 11 | 58358885 | 3 | 2.114623 |
| rs1943281      | GLYATL2   | 11 | 58368525 | 3 | 2.053897 |
| rs1943281      | GLYATL2   | 11 | 58368525 | 5 | 0.457165 |
| rs1943281      | GLYATL2   | 11 | 58368525 | 2 | 0.146464 |
| rs1943281      | GLYATL2   | 11 | 58368525 | 8 | 2.193012 |
| rs1943282      | GLYATL2   | 11 | 58368570 | 8 | 1.989147 |
| rs1943282      | GLYATL2   | 11 | 58368570 | 5 | 2.283511 |
| rs1943282      | GLYATL2   | 11 | 58368570 | 3 | 2.665607 |
| rs517039       | GLYATL1   | 11 | 58480725 | 4 | 0.535543 |
| rs517039       | GLYATL1   | 11 | 58480725 | 8 | 1.204924 |

|                |           |    |          |   |          |
|----------------|-----------|----|----------|---|----------|
| rs1048696      | DTX4      | 11 | 58733210 | 5 | 4.365342 |
| rs3847         | DTX4      | 11 | 58733287 | 2 | 4.864047 |
| rs3847         | DTX4      | 11 | 58733287 | 3 | 0.542129 |
| rs5029315      | DTX4      | 11 | 58734344 | 3 | 1.62165  |
| rs5029315      | DTX4      | 11 | 58734344 | 5 | 0.442107 |
| rs7926933      | MPEG1     | 11 | 58735260 | 5 | 2.53267  |
| rs7926933      | MPEG1     | 11 | 58735260 | 8 | 1.236906 |
| rs544864       | MPEG1     | 11 | 58735516 | 2 | 0.810421 |
| rs544864       | MPEG1     | 11 | 58735516 | 3 | 0.734505 |
| rs544864       | MPEG1     | 11 | 58735516 | 1 | 0.190733 |
| rs11229895     | LOC341112 | 11 | 58783477 | 3 | 0.057804 |
| rs11229895     | LOC341112 | 11 | 58783477 | 1 | 1.008659 |
| rs7941190      | OR5AN1    | 11 | 58889374 | 3 | 0.411746 |
| rs7941190      | OR5AN1    | 11 | 58889374 | 2 | 0.356636 |
| rs1453541      | OR4D6     | 11 | 58981797 | 6 | 2.345115 |
| rs1453541      | OR4D6     | 11 | 58981797 | 3 | 2.490002 |
| rs1453541      | OR4D6     | 11 | 58981797 | 1 | 2.397426 |
| rs34528912     | TCN1      | 11 | 59388111 | 2 | 3.592474 |
| rs569108       | MS4A2     | 11 | 59619680 | 2 | 2.417438 |
| rs1019670      | MS4A6A    | 11 | 59697175 | 3 | 0.265043 |
| rs12453        | MS4A6A    | 11 | 59702321 | 3 | 1.607426 |
| rs12453        | MS4A6A    | 11 | 59702321 | 4 | 1.395797 |
| rs2304934      | MS4A6E    | 11 | 59858972 | 3 | 0.251083 |
| rs2304933      | MS4A6E    | 11 | 59859083 | 3 | 0.310694 |
| rs950802       | MS4A7     | 11 | 59909160 | 1 | 1.620811 |
| SNP11-60021578 | MS4A12    | 11 | 60021578 | 1 | 1.786686 |
| SNP11-60021578 | MS4A12    | 11 | 60021578 | 6 | 0.536363 |
| SNP11-60021578 | MS4A12    | 11 | 60021578 | 5 | 0.852052 |
| rs6591595      | MS4A13    | 11 | 60047989 | 7 | 1.290618 |
| rs12419635     | MS4A10    | 11 | 60322497 | 6 | 4.126635 |
| rs592637       | MS4A10    | 11 | 60324731 | 8 | 1.751016 |
| rs489172       | ZP1       | 11 | 60393740 | 8 | 0.138179 |
| rs489172       | ZP1       | 11 | 60393740 | 5 | 0.354895 |
| rs489172       | ZP1       | 11 | 60393740 | 3 | 0.84089  |
| rs10897122     | ZP1       | 11 | 60395037 | 1 | 4.136195 |
| rs10897122     | ZP1       | 11 | 60395037 | 5 | 2.166846 |
| rs10897122     | ZP1       | 11 | 60395037 | 3 | 0.055239 |
| rs10897122     | ZP1       | 11 | 60395037 | 8 | 0.587611 |
| rs3763840      | PRPF19    | 11 | 60422917 | 3 | 0.399525 |
| rs3763840      | PRPF19    | 11 | 60422917 | 2 | 1.538564 |
| SNP11-60460353 | TMEM132A  | 11 | 60460353 | 3 | 0.165355 |
| SNP11-60460353 | TMEM132A  | 11 | 60460353 | 1 | 4.369452 |
| SNP11-60460353 | TMEM132A  | 11 | 60460353 | 5 | 0.119231 |
| rs1050922      | CD6       | 11 | 60541928 | 5 | 1.223439 |
| rs1050922      | CD6       | 11 | 60541928 | 1 | 0.844603 |
| rs1050922      | CD6       | 11 | 60541928 | 6 | 4.938635 |
| rs1050922      | CD6       | 11 | 60541928 | 2 | 2.254042 |

|                |           |    |          |   |          |
|----------------|-----------|----|----------|---|----------|
| rs2186409      | CD5       | 11 | 60651068 | 7 | 0.836333 |
| rs11230648     | VWCE      | 11 | 60782706 | 8 | 0.173816 |
| rs11230648     | VWCE      | 11 | 60782706 | 3 | 1.11731  |
| rs198430       | DAGLA     | 11 | 61244266 | 1 | 5.850488 |
| rs198430       | DAGLA     | 11 | 61244266 | 7 | 0.765165 |
| rs149803       | C11orf9   | 11 | 61295596 | 7 | 0.057397 |
| rs149803       | C11orf9   | 11 | 61295596 | 3 | 0.699146 |
| rs149803       | C11orf9   | 11 | 61295596 | 6 | 0.203575 |
| rs149803       | C11orf9   | 11 | 61295596 | 2 | 3.219575 |
| rs174538       | C11orf10  | 11 | 61316657 | 6 | 1.217966 |
| rs174538       | C11orf10  | 11 | 61316657 | 2 | 5.556189 |
| rs412334       | FEN1      | 11 | 61316837 | 6 | 1.954026 |
| rs412334       | FEN1      | 11 | 61316837 | 3 | 0.99309  |
| rs174545       | FADS1     | 11 | 61325882 | 6 | 0.935381 |
| rs174545       | FADS1     | 11 | 61325882 | 5 | 0.336546 |
| rs174545       | FADS1     | 11 | 61325882 | 2 | 6.595754 |
| GA009790       | FADS2     | 11 | 61390523 | 6 | 3.345833 |
| rs13966        | RAB3IL1   | 11 | 61421568 | 8 | 4.347717 |
| rs13966        | RAB3IL1   | 11 | 61421568 | 3 | 0.656599 |
| rs174474       | RAB3IL1   | 11 | 61428841 | 5 | 0.804712 |
| rs739789       | RAB3IL1   | 11 | 61441545 | 6 | 0.748893 |
| rs1109748      | BEST1     | 11 | 61479221 | 5 | 0.410645 |
| rs1047738      | INCENP    | 11 | 61676091 | 8 | 5.208643 |
| rs1047738      | INCENP    | 11 | 61676091 | 2 | 4.522167 |
| rs2232942      | SCGB1D1   | 11 | 61717555 | 3 | 0.311229 |
| rs3741245      | ASRGL1    | 11 | 61862017 | 4 | 4.328814 |
| rs4281490      | ASRGL1    | 11 | 61916502 | 4 | 0.496596 |
| rs3741240      | SCGB1A1   | 11 | 61943118 | 4 | 0.695656 |
| rs3888173      | TUT1      | 11 | 62102707 | 5 | 0.127604 |
| rs11553576     | EML3      | 11 | 62135377 | 5 | 0.906236 |
| rs11553576     | EML3      | 11 | 62135377 | 8 | 0.409401 |
| rs2512561      | LOC221091 | 11 | 62210528 | 3 | 0.985163 |
| rs2512561      | LOC221091 | 11 | 62210528 | 4 | 1.959894 |
| SNP11-62214851 | BSCL2     | 11 | 62214851 | 6 | 6.399303 |
| SNP11-62214851 | BSCL2     | 11 | 62214851 | 5 | 0.093004 |
| SNP11-62214851 | BSCL2     | 11 | 62214851 | 4 | 0.655012 |
| SNP11-62214851 | BSCL2     | 11 | 62214851 | 1 | 2.592262 |
| SNP11-62214851 | BSCL2     | 11 | 62214851 | 3 | 0.300916 |
| rs2067477      | CHRM1     | 11 | 62434882 | 4 | 1.141795 |
| rs11568628     | SLC22A6   | 11 | 62508487 | 6 | 4.332405 |
| rs11568628     | SLC22A6   | 11 | 62508487 | 4 | 2.31299  |
| rs11568628     | SLC22A6   | 11 | 62508487 | 2 | 3.540407 |
| rs4963245      | MGC34821  | 11 | 62643376 | 3 | 0.181409 |
| rs1939748      | MGC34821  | 11 | 62667655 | 1 | 0.015245 |
| rs1939748      | MGC34821  | 11 | 62667655 | 3 | 1.220723 |
| rs1790218      | SLC22A10  | 11 | 62814501 | 3 | 0.160946 |
| rs940611       | HRASLS5   | 11 | 63013017 | 8 | 0.858156 |

|                |          |    |          |   |          |
|----------------|----------|----|----------|---|----------|
| rs940611       | HRASLS5  | 11 | 63013017 | 6 | 0.197236 |
| rs3781604      | LGALS12  | 11 | 63040611 | 6 | 2.088556 |
| rs11551944     | RTN3     | 11 | 63205701 | 8 | 1.578383 |
| rs11551944     | RTN3     | 11 | 63205701 | 6 | 5.663688 |
| rs11551942     | RTN3     | 11 | 63283277 | 8 | 7.783292 |
| rs11551942     | RTN3     | 11 | 63283277 | 6 | 9.174203 |
| rs3740637      | NAT11    | 11 | 63469893 | 7 | 0.769798 |
| rs3740637      | NAT11    | 11 | 63469893 | 6 | 2.396064 |
| rs3740637      | NAT11    | 11 | 63469893 | 4 | 2.162206 |
| rs3740637      | NAT11    | 11 | 63469893 | 5 | 2.372192 |
| rs10897465     | NAT11    | 11 | 63479024 | 5 | 0.252638 |
| rs10897465     | NAT11    | 11 | 63479024 | 2 | 5.535333 |
| rs638227       | FLRT1    | 11 | 63628125 | 1 | 0.059404 |
| rs638227       | FLRT1    | 11 | 63628125 | 3 | 0.800766 |
| rs638227       | FLRT1    | 11 | 63628125 | 5 | 0.388253 |
| rs638227       | FLRT1    | 11 | 63628125 | 6 | 0.423909 |
| rs614397       | FLRT1    | 11 | 63640561 | 6 | 4.638441 |
| rs614397       | FLRT1    | 11 | 63640561 | 4 | 0.910335 |
| rs3751120      | FLRT1    | 11 | 63641029 | 6 | 5.80327  |
| rs3751120      | FLRT1    | 11 | 63641029 | 4 | 0.539656 |
| rs3751121      | FLRT1    | 11 | 63641050 | 6 | 0.928874 |
| rs947939       | FLRT1    | 11 | 63641863 | 3 | 0.459715 |
| rs947939       | FLRT1    | 11 | 63641863 | 1 | 1.207436 |
| rs947939       | FLRT1    | 11 | 63641863 | 5 | 0.333086 |
| rs677447       | FLRT1    | 11 | 63642280 | 1 | 1.31614  |
| rs677447       | FLRT1    | 11 | 63642280 | 6 | 0.240063 |
| rs677447       | FLRT1    | 11 | 63642280 | 4 | 3.616736 |
| rs677447       | FLRT1    | 11 | 63642280 | 2 | 1.553134 |
| rs677447       | FLRT1    | 11 | 63642280 | 3 | 0.887152 |
| rs677447       | FLRT1    | 11 | 63642280 | 5 | 0.710639 |
| rs663149       | FLRT1    | 11 | 63643115 | 2 | 8.710609 |
| rs663149       | FLRT1    | 11 | 63643115 | 3 | 0.53399  |
| rs663149       | FLRT1    | 11 | 63643115 | 4 | 0.23923  |
| rs663149       | FLRT1    | 11 | 63643115 | 5 | 3.928681 |
| rs663149       | FLRT1    | 11 | 63643115 | 1 | 0.912319 |
| rs2286612      | NUDT22   | 11 | 63750806 | 7 | 0.177094 |
| rs3741403      | DNAJC4   | 11 | 63756105 | 5 | 0.124767 |
| rs3741403      | DNAJC4   | 11 | 63756105 | 1 | 0.844671 |
| rs3741403      | DNAJC4   | 11 | 63756105 | 2 | 2.438062 |
| rs953778       | KCNK4    | 11 | 63823575 | 6 | 1.338749 |
| SNP11-63865694 | CCDC88B  | 11 | 63865694 | 7 | 0.866372 |
| rs685870       | CCDC88B  | 11 | 63868504 | 7 | 0.978853 |
| rs612448       | CCDC88B  | 11 | 63881091 | 7 | 0.818233 |
| rs600377       | CCDC88B  | 11 | 63881516 | 7 | 0.106243 |
| rs9734313      | SLC22A12 | 11 | 64114887 | 5 | 0.765355 |
| rs9734313      | SLC22A12 | 11 | 64114887 | 1 | 2.337042 |
| rs11231825     | SLC22A12 | 11 | 64116850 | 5 | 4.097795 |

|                |              |    |          |   |          |
|----------------|--------------|----|----------|---|----------|
| rs607969       | MEN1         | 11 | 64332081 | 4 | 6.154584 |
| rs10792447     | CDC42BPG     | 11 | 64348548 | 8 | 0.124772 |
| rs10792447     | CDC42BPG     | 11 | 64348548 | 5 | 0.654307 |
| rs10792447     | CDC42BPG     | 11 | 64348548 | 2 | 2.45229  |
| rs10792447     | CDC42BPG     | 11 | 64348548 | 4 | 0.43354  |
| rs10792447     | CDC42BPG     | 11 | 64348548 | 7 | 1.03606  |
| rs3741395      | CDC42BPG     | 11 | 64354082 | 6 | 0.501261 |
| rs3741395      | CDC42BPG     | 11 | 64354082 | 4 | 0.717917 |
| rs3741395      | CDC42BPG     | 11 | 64354082 | 7 | 0.223209 |
| rs3741395      | CDC42BPG     | 11 | 64354082 | 5 | 0.370118 |
| rs3741395      | CDC42BPG     | 11 | 64354082 | 8 | 0.07931  |
| rs7933683      | CDC42BPG     | 11 | 64358509 | 7 | 0.040641 |
| rs7933683      | CDC42BPG     | 11 | 64358509 | 4 | 0.468354 |
| rs7933683      | CDC42BPG     | 11 | 64358509 | 2 | 2.403386 |
| rs7933683      | CDC42BPG     | 11 | 64358509 | 6 | 0.602306 |
| rs7933683      | CDC42BPG     | 11 | 64358509 | 5 | 0.584328 |
| rs1211284      | EHD1         | 11 | 64402447 | 7 | 0.25958  |
| rs1211284      | EHD1         | 11 | 64402447 | 6 | 6.576282 |
| rs673995       | GPHA2        | 11 | 64458776 | 3 | 0.233502 |
| rs673995       | GPHA2        | 11 | 64458776 | 1 | 1.305558 |
| rs542175       | SNX15        | 11 | 64562846 | 2 | 5.553077 |
| rs542175       | SNX15        | 11 | 64562846 | 8 | 0.608954 |
| SNP11-6456381  | SNX15        | 11 | 64563811 | 8 | 0.722179 |
| rs11605377     | CDC45        | 11 | 64602146 | 3 | 0.119635 |
| rs13807        | FAU          | 11 | 64645610 | 6 | 6.478919 |
| rs3953797      | LOC728975    | 11 | 64704853 | 7 | 0.335762 |
| rs3953797      | LOC728975    | 11 | 64704853 | 1 | 3.874437 |
| SNP11-64880984 | TIGD3        | 11 | 64880984 | 4 | 0.393785 |
| SNP11-64880984 | TIGD3        | 11 | 64880984 | 2 | 4.007596 |
| rs2073800      | FRMD8        | 11 | 64917705 | 3 | 0.774737 |
| rs1144924      | TncRNA       | 11 | 64960137 | 5 | 0.835115 |
| rs12790427     | PCNXL3       | 11 | 65141303 | 4 | 0.049844 |
| rs1193851      | PCNXL3       | 11 | 65142782 | 2 | 2.748621 |
| rs1193851      | PCNXL3       | 11 | 65142782 | 7 | 7.067056 |
| rs1193851      | PCNXL3       | 11 | 65142782 | 3 | 0.731187 |
| rs746429       | SIPA1        | 11 | 65174010 | 1 | 1.365186 |
| rs746429       | SIPA1        | 11 | 65174010 | 7 | 0.647941 |
| rs746429       | SIPA1        | 11 | 65174010 | 3 | 0.751283 |
| rs746429       | SIPA1        | 11 | 65174010 | 4 | 0.26644  |
| rs610037       | DKFZp761E198 | 11 | 65303433 | 5 | 0.652115 |
| rs610037       | DKFZp761E198 | 11 | 65303433 | 7 | 0.893185 |
| rs610037       | DKFZp761E198 | 11 | 65303433 | 2 | 2.966818 |
| rs610037       | DKFZp761E198 | 11 | 65303433 | 4 | 0.827779 |
| rs610037       | DKFZp761E198 | 11 | 65303433 | 3 | 1.069291 |
| rs656040       | FLJ30934     | 11 | 65377633 | 8 | 4.894553 |
| rs656040       | FLJ30934     | 11 | 65377633 | 7 | 0.663628 |
| rs656040       | FLJ30934     | 11 | 65377633 | 1 | 4.244901 |

|            |          |    |          |   |          |
|------------|----------|----|----------|---|----------|
| rs656040   | FLJ30934 | 11 | 65377633 | 3 | 0.933664 |
| rs13817    | MUS81    | 11 | 65384910 | 1 | 1.777395 |
| rs13817    | MUS81    | 11 | 65384910 | 3 | 0.450843 |
| rs659857   | MUS81    | 11 | 65386508 | 7 | 0.981978 |
| rs659857   | MUS81    | 11 | 65386508 | 3 | 0.990959 |
| rs34891773 | MUS81    | 11 | 65387937 | 6 | 1.766089 |
| rs630303   | MUS81    | 11 | 65388549 | 7 | 1.689727 |
| rs630303   | MUS81    | 11 | 65388549 | 3 | 1.615222 |
| rs630303   | MUS81    | 11 | 65388549 | 1 | 3.069286 |
| rs687672   | CTSW     | 11 | 65406560 | 8 | 2.239454 |
| rs491973   | TSGA10IP | 11 | 65483877 | 6 | 0.615549 |
| rs491973   | TSGA10IP | 11 | 65483877 | 2 | 1.494959 |
| rs491973   | TSGA10IP | 11 | 65483877 | 8 | 0.707365 |
| rs1047464  | EIF1AD   | 11 | 65526032 | 2 | 0.636902 |
| rs1047464  | EIF1AD   | 11 | 65526032 | 1 | 0.578208 |
| rs1203998  | CATSPER1 | 11 | 65550030 | 2 | 4.90674  |
| rs1203998  | CATSPER1 | 11 | 65550030 | 3 | 0.151884 |
| rs1893316  | CATSPER1 | 11 | 65550373 | 3 | 1.060927 |
| GA028131   | SF3B2    | 11 | 65583280 | 3 | 0.546703 |
| GA028131   | SF3B2    | 11 | 65583280 | 6 | 1.473255 |
| GA028131   | SF3B2    | 11 | 65583280 | 2 | 4.44526  |
| rs3741367  | CD248    | 11 | 65839705 | 1 | 0.90772  |
| rs3741367  | CD248    | 11 | 65839705 | 4 | 0.866732 |
| rs3741367  | CD248    | 11 | 65839705 | 3 | 0.06912  |
| rs3741367  | CD248    | 11 | 65839705 | 2 | 1.260097 |
| rs3741368  | CD248    | 11 | 65840358 | 3 | 0.206934 |
| rs11550299 | DPP3     | 11 | 66010661 | 4 | 0.349731 |
| rs11550299 | DPP3     | 11 | 66010661 | 8 | 1.734212 |
| rs2305535  | DPP3     | 11 | 66028813 | 8 | 1.946303 |
| rs2305535  | DPP3     | 11 | 66028813 | 4 | 1.138138 |
| rs17065    | DPP3     | 11 | 66033611 | 8 | 6.629381 |
| rs17065    | DPP3     | 11 | 66033611 | 4 | 6.990897 |
| rs3816492  | BBS1     | 11 | 66053939 | 4 | 0.430657 |
| rs3816492  | BBS1     | 11 | 66053939 | 8 | 5.973736 |
| rs1815739  | ACTN3    | 11 | 66084671 | 6 | 1.73903  |
| rs540874   | ACTN3    | 11 | 66086308 | 3 | 1.319526 |
| rs540874   | ACTN3    | 11 | 66086308 | 4 | 1.110229 |
| rs572846   | CTSF     | 11 | 66088034 | 5 | 1.026689 |
| rs572846   | CTSF     | 11 | 66088034 | 3 | 0.262107 |
| rs1127894  | CTSF     | 11 | 66092124 | 6 | 2.82237  |
| rs1127894  | CTSF     | 11 | 66092124 | 4 | 2.997234 |
| rs1127894  | CTSF     | 11 | 66092124 | 5 | 1.129045 |
| rs1127894  | CTSF     | 11 | 66092124 | 3 | 1.233154 |
| rs486584   | CCDC87   | 11 | 66114702 | 8 | 5.137405 |
| rs486584   | CCDC87   | 11 | 66114702 | 4 | 5.897844 |
| rs486584   | CCDC87   | 11 | 66114702 | 3 | 1.181287 |
| rs486584   | CCDC87   | 11 | 66114702 | 6 | 0.412831 |

|            |          |    |          |   |          |
|------------|----------|----|----------|---|----------|
| rs486584   | CCDC87   | 11 | 66114702 | 5 | 0.155758 |
| GA028156   | CCS      | 11 | 66129881 | 4 | 0.511946 |
| rs35532855 | SPTBN2   | 11 | 66214257 | 3 | 0.259977 |
| rs623022   | SPTBN2   | 11 | 66215556 | 8 | 6.434323 |
| rs3741194  | LRFN4    | 11 | 66382810 | 6 | 0.87185  |
| rs3741194  | LRFN4    | 11 | 66382810 | 5 | 3.012166 |
| rs3741194  | LRFN4    | 11 | 66382810 | 3 | 0.465226 |
| rs1626067  | KIAA1394 | 11 | 66949131 | 5 | 0.361202 |
| rs1626067  | KIAA1394 | 11 | 66949131 | 2 | 4.438927 |
| rs1626067  | KIAA1394 | 11 | 66949131 | 4 | 1.047214 |
| rs1626067  | KIAA1394 | 11 | 66949131 | 3 | 1.799818 |
| rs8191439  | GSTP1    | 11 | 67107873 | 4 | 0.438554 |
| rs1695     | GSTP1    | 11 | 67109265 | 7 | 0.445498 |
| rs1695     | GSTP1    | 11 | 67109265 | 2 | 1.950525 |
| rs1695     | GSTP1    | 11 | 67109265 | 5 | 0.309005 |
| rs4024254  | C11orf72 | 11 | 67127342 | 5 | 0.958985 |
| rs4024254  | C11orf72 | 11 | 67127342 | 6 | 0.919517 |
| rs12421329 | C11orf72 | 11 | 67129053 | 6 | 0.86233  |
| rs3127     | ALDH3B2  | 11 | 67187165 | 3 | 0.109945 |
| rs3127     | ALDH3B2  | 11 | 67187165 | 2 | 6.790769 |
| rs2286168  | ALDH3B1  | 11 | 67545714 | 8 | 0.524551 |
| rs2286168  | ALDH3B1  | 11 | 67545714 | 1 | 0.541042 |
| rs3751082  | ALDH3B1  | 11 | 67551929 | 1 | 0.529499 |
| rs3751082  | ALDH3B1  | 11 | 67551929 | 8 | 3.056572 |
| rs3751082  | ALDH3B1  | 11 | 67551929 | 4 | 4.402077 |
| rs3751082  | ALDH3B1  | 11 | 67551929 | 7 | 0.063509 |
| GA010046   | NDUFS8   | 11 | 67560650 | 2 | 11.81793 |
| rs36027301 | TCIRG1   | 11 | 67565844 | 3 | 0.265946 |
| rs11481    | CHKA     | 11 | 67576911 | 2 | 5.519087 |
| rs11481    | CHKA     | 11 | 67576911 | 6 | 0.543124 |
| rs11481    | CHKA     | 11 | 67576911 | 1 | 0.081089 |
| rs11481    | CHKA     | 11 | 67576911 | 4 | 0.232851 |
| rs6591334  | SUV420H1 | 11 | 67681135 | 3 | 0.052763 |
| rs2277268  | LRP5     | 11 | 67930698 | 4 | 0.25443  |
| rs17149104 | LRP5     | 11 | 67949206 | 5 | 0.743955 |
| rs3736228  | LRP5     | 11 | 67957871 | 3 | 0.489372 |
| rs3736228  | LRP5     | 11 | 67957871 | 6 | 0.242205 |
| rs11574422 | LRP5     | 11 | 67970565 | 5 | 0.848121 |
| rs1996     | SAPS3    | 11 | 68139167 | 7 | 1.491131 |
| rs1996     | SAPS3    | 11 | 68139167 | 4 | 0.701425 |
| rs1042577  | GAL      | 11 | 68215046 | 3 | 0.294815 |
| rs1042577  | GAL      | 11 | 68215046 | 7 | 0.25491  |
| rs1042577  | GAL      | 11 | 68215046 | 6 | 8.534685 |
| rs2228502  | CPT1A    | 11 | 68305916 | 7 | 0.431816 |
| rs11228356 | CPT1A    | 11 | 68317363 | 4 | 0.8587   |
| rs17610395 | CPT1A    | 11 | 68318904 | 4 | 5.771464 |
| rs17610395 | CPT1A    | 11 | 68318904 | 1 | 4.705216 |

|                |          |    |          |   |          |
|----------------|----------|----|----------|---|----------|
| rs2236654      | IGHMBP2  | 11 | 68460604 | 5 | 7.04324  |
| rs2236654      | IGHMBP2  | 11 | 68460604 | 7 | 0.141461 |
| rs2236654      | IGHMBP2  | 11 | 68460604 | 8 | 9.822748 |
| rs2236654      | IGHMBP2  | 11 | 68460604 | 6 | 4.963927 |
| rs546382       | IGHMBP2  | 11 | 68460840 | 5 | 5.493331 |
| rs546382       | IGHMBP2  | 11 | 68460840 | 8 | 3.16727  |
| rs546382       | IGHMBP2  | 11 | 68460840 | 3 | 0.152317 |
| rs17612126     | IGHMBP2  | 11 | 68462250 | 7 | 1.26494  |
| rs17612126     | IGHMBP2  | 11 | 68462250 | 3 | 0.997776 |
| rs17612126     | IGHMBP2  | 11 | 68462250 | 6 | 0.882081 |
| rs17612126     | IGHMBP2  | 11 | 68462250 | 4 | 1.874526 |
| rs896973       | TPCN2    | 11 | 68608042 | 8 | 0.399685 |
| rs896973       | TPCN2    | 11 | 68608042 | 7 | 0.023131 |
| rs3829241      | TPCN2    | 11 | 68611939 | 7 | 3.85672  |
| rs3829241      | TPCN2    | 11 | 68611939 | 8 | 0.043699 |
| rs3862792      | CCND1    | 11 | 69172037 | 6 | 0.386898 |
| rs3862792      | CCND1    | 11 | 69172037 | 1 | 4.31298  |
| rs948992       | FGF19    | 11 | 69222519 | 2 | 1.57658  |
| rs948992       | FGF19    | 11 | 69222519 | 5 | 0.078441 |
| rs948992       | FGF19    | 11 | 69222519 | 4 | 0.953376 |
| rs948992       | FGF19    | 11 | 69222519 | 7 | 0.683283 |
| rs643301       | CTTN     | 11 | 69957414 | 4 | 0.363283 |
| rs643301       | CTTN     | 11 | 69957414 | 7 | 0.520589 |
| rs643301       | CTTN     | 11 | 69957414 | 6 | 0.339327 |
| rs2664         | KRTAP5-9 | 11 | 70937891 | 5 | 1.126413 |
| rs2663         | KRTAP5-9 | 11 | 70937944 | 1 | 2.492143 |
| rs392565       | PDE2A    | 11 | 71968277 | 1 | 0.806178 |
| rs2306615      | CENTD2   | 11 | 72092977 | 3 | 0.004694 |
| rs2306615      | CENTD2   | 11 | 72092977 | 5 | 0.203379 |
| rs3741152      | P2RY6    | 11 | 72686562 | 1 | 3.795018 |
| rs7115806      | P2RY6    | 11 | 72687080 | 1 | 5.489985 |
| rs12272360     | ARHGEF17 | 11 | 72697706 | 8 | 2.94095  |
| rs10898932     | RAB6A    | 11 | 73066237 | 4 | 9.4089   |
| rs1792174      | MRPL48   | 11 | 73176581 | 7 | 1.520164 |
| GA010135       | CHCHD8   | 11 | 73265481 | 4 | 1.41845  |
| rs2067912      | PAAF1    | 11 | 73288997 | 1 | 5.299846 |
| rs3741138      | PAAF1    | 11 | 73298185 | 6 | 0.585652 |
| rs653263       | DNAJB13  | 11 | 73348293 | 1 | 0.813924 |
| rs2306819      | DNAJB13  | 11 | 73358738 | 5 | 1.032929 |
| rs2306819      | DNAJB13  | 11 | 73358738 | 7 | 0.498735 |
| rs2306819      | DNAJB13  | 11 | 73358738 | 1 | 1.975345 |
| rs647126       | UCP3     | 11 | 73389668 | 1 | 0.303696 |
| rs647126       | UCP3     | 11 | 73389668 | 2 | 1.29928  |
| rs1800006      | UCP3     | 11 | 73394902 | 2 | 1.884997 |
| rs1800006      | UCP3     | 11 | 73394902 | 5 | 1.063716 |
| rs1800006      | UCP3     | 11 | 73394902 | 6 | 1.452201 |
| SNP11-73446201 | C2CD3    | 11 | 73446201 | 7 | 0.080105 |



|                |          |    |          |   |          |
|----------------|----------|----|----------|---|----------|
| rs4453265      | C2CD3    | 11 | 73462974 | 1 | 0.273047 |
| rs4453265      | C2CD3    | 11 | 73462974 | 5 | 0.138173 |
| rs4453265      | C2CD3    | 11 | 73462974 | 4 | 1.985507 |
| rs4453265      | C2CD3    | 11 | 73462974 | 7 | 0.555662 |
| rs826058       | C2CD3    | 11 | 73474565 | 1 | 4.69522  |
| rs826058       | C2CD3    | 11 | 73474565 | 4 | 1.669926 |
| rs826058       | C2CD3    | 11 | 73474565 | 7 | 0.840824 |
| rs11235995     | C2CD3    | 11 | 73484091 | 4 | 3.887882 |
| rs3741133      | PPME1    | 11 | 73642337 | 4 | 0.628694 |
| rs3741133      | PPME1    | 11 | 73642337 | 2 | 4.589447 |
| rs17132882     | PPME1    | 11 | 73642810 | 4 | 1.255633 |
| rs17132882     | PPME1    | 11 | 73642810 | 5 | 7.267884 |
| rs3741132      | P4HA3    | 11 | 73655891 | 4 | 0.046509 |
| rs3741132      | P4HA3    | 11 | 73655891 | 2 | 3.875196 |
| rs8471         | PGM2L1   | 11 | 73719240 | 5 | 0.8019   |
| rs1053021      | PGM2L1   | 11 | 73722205 | 7 | 0.783598 |
| rs1053021      | PGM2L1   | 11 | 73722205 | 6 | 0.807277 |
| rs1053021      | PGM2L1   | 11 | 73722205 | 1 | 4.867454 |
| SNP11-73786814 | PGM2L1   | 11 | 73786814 | 4 | 0.118695 |
| SNP11-73786814 | PGM2L1   | 11 | 73786814 | 2 | 2.779314 |
| rs9516         | KCNE3    | 11 | 73843926 | 4 | 1.29738  |
| rs9516         | KCNE3    | 11 | 73843926 | 1 | 0.318176 |
| rs9516         | KCNE3    | 11 | 73843926 | 6 | 2.397416 |
| rs7789         | KCNE3    | 11 | 73843968 | 1 | 2.870716 |
| rs12271177     | KCNE3    | 11 | 73845278 | 4 | 1.034545 |
| rs12271177     | KCNE3    | 11 | 73845278 | 6 | 1.496485 |
| rs12271177     | KCNE3    | 11 | 73845278 | 5 | 0.380371 |
| rs12271177     | KCNE3    | 11 | 73845278 | 1 | 1.022137 |
| rs1280091      | NULL     | 11 | 73886874 | 1 | 4.924663 |
| rs1280091      | NULL     | 11 | 73886874 | 7 | 1.604467 |
| rs7948433      | CHRD2    | 11 | 74097026 | 6 | 0.219707 |
| rs2298746      | XRRA1    | 11 | 74231482 | 5 | 1.383941 |
| rs2298746      | XRRA1    | 11 | 74231482 | 6 | 5.388471 |
| rs4944960      | XRRA1    | 11 | 74237094 | 5 | 0.968774 |
| rs4944960      | XRRA1    | 11 | 74237094 | 6 | 5.681388 |
| rs4944961      | XRRA1    | 11 | 74237129 | 6 | 5.734375 |
| rs4944961      | XRRA1    | 11 | 74237129 | 5 | 2.511163 |
| rs2165163      | XRRA1    | 11 | 74337791 | 6 | 0.259695 |
| rs2165163      | XRRA1    | 11 | 74337791 | 5 | 1.681281 |
| rs7115499      | NEU3     | 11 | 74383250 | 1 | 5.156972 |
| rs2851069      | SLCO2B1  | 11 | 74540004 | 3 | 1.593733 |
| rs2851069      | SLCO2B1  | 11 | 74540004 | 5 | 1.411413 |
| rs2851069      | SLCO2B1  | 11 | 74540004 | 6 | 2.050754 |
| rs877711       | ARRB1    | 11 | 74672000 | 1 | 0.242538 |
| rs877711       | ARRB1    | 11 | 74672000 | 4 | 1.100024 |
| rs651581       | SERPINH1 | 11 | 74955640 | 1 | 2.874995 |
| rs651581       | SERPINH1 | 11 | 74955640 | 7 | 1.565077 |

|                |          |    |          |   |          |
|----------------|----------|----|----------|---|----------|
| rs651581       | SERPINH1 | 11 | 74955640 | 6 | 1.032837 |
| rs651581       | SERPINH1 | 11 | 74955640 | 8 | 1.221902 |
| rs3197153      | LRRC32   | 11 | 76046720 | 2 | 1.050943 |
| rs3197153      | LRRC32   | 11 | 76046720 | 1 | 0.792773 |
| rs3197153      | LRRC32   | 11 | 76046720 | 3 | 0.046334 |
| rs3197153      | LRRC32   | 11 | 76046720 | 6 | 0.386205 |
| rs3197153      | LRRC32   | 11 | 76046720 | 8 | 0.398226 |
| rs3197153      | LRRC32   | 11 | 76046720 | 5 | 0.100778 |
| rs3197153      | LRRC32   | 11 | 76046720 | 7 | 0.5701   |
| rs3781701      | LRRC32   | 11 | 76047067 | 5 | 0.513902 |
| rs3781701      | LRRC32   | 11 | 76047067 | 6 | 0.298938 |
| rs3781701      | LRRC32   | 11 | 76047067 | 3 | 0.537568 |
| rs3781701      | LRRC32   | 11 | 76047067 | 1 | 0.936656 |
| rs3781700      | LRRC32   | 11 | 76047357 | 6 | 0.034012 |
| rs3781700      | LRRC32   | 11 | 76047357 | 3 | 0.425571 |
| rs3781700      | LRRC32   | 11 | 76047357 | 1 | 0.722285 |
| rs11236839     | LRRC32   | 11 | 76047561 | 3 | 0.642828 |
| rs3824890      | LRRC32   | 11 | 76047652 | 7 | 0.183189 |
| rs1320646      | LRRC32   | 11 | 76047695 | 1 | 1.177082 |
| rs1320645      | LRRC32   | 11 | 76047736 | 7 | 0.661346 |
| rs1320645      | LRRC32   | 11 | 76047736 | 1 | 0.648406 |
| rs10899257     | GUCY2E   | 11 | 76092857 | 5 | 0.405947 |
| rs11546727     | TSKU     | 11 | 76184536 | 2 | 5.458511 |
| SNP11-76315299 | PHCA     | 11 | 76315299 | 1 | 0.131237 |
| SNP11-76315299 | PHCA     | 11 | 76315299 | 5 | 0.80836  |
| SNP11-76315299 | PHCA     | 11 | 76315299 | 2 | 1.258204 |
| rs3740767      | PHCA     | 11 | 76379254 | 1 | 0.390946 |
| rs3740767      | PHCA     | 11 | 76379254 | 5 | 0.967373 |
| rs3740767      | PHCA     | 11 | 76379254 | 2 | 0.247179 |
| rs2233549      | OMP      | 11 | 76491758 | 4 | 1.960532 |
| rs2277276      | CAPN5    | 11 | 76513488 | 1 | 4.530737 |
| rs2276288      | MYO7A    | 11 | 76590284 | 8 | 0.759982 |
| rs2276288      | MYO7A    | 11 | 76590284 | 1 | 0.463483 |
| rs2276288      | MYO7A    | 11 | 76590284 | 2 | 3.509236 |
| rs2276288      | MYO7A    | 11 | 76590284 | 7 | 6.271622 |
| rs41298757     | MYO7A    | 11 | 76600516 | 2 | 2.322488 |
| rs12363944     | GDPD4    | 11 | 76605673 | 3 | 0.412881 |
| rs2276415      | AQP11    | 11 | 76978989 | 4 | 5.571201 |
| rs2276415      | AQP11    | 11 | 76978989 | 5 | 0.487725 |
| rs588217       | C11orf67 | 11 | 77261024 | 1 | 0.359048 |
| rs588217       | C11orf67 | 11 | 77261024 | 6 | 0.827637 |
| rs588217       | C11orf67 | 11 | 77261024 | 3 | 0.060166 |
| rs11237362     | KCTD14   | 11 | 77411857 | 1 | 3.404686 |
| rs655445       | THRSP    | 11 | 77456459 | 5 | 0.659967 |
| rs655445       | THRSP    | 11 | 77456459 | 1 | 7.351521 |
| rs1263505      | ALG8     | 11 | 77489638 | 5 | 6.464677 |
| rs1263505      | ALG8     | 11 | 77489638 | 1 | 3.142054 |

|                |           |    |          |   |          |
|----------------|-----------|----|----------|---|----------|
| rs2510044      | USP35     | 11 | 77586662 | 4 | 0.530282 |
| rs2510044      | USP35     | 11 | 77586662 | 1 | 5.020264 |
| rs2510045      | USP35     | 11 | 77598211 | 1 | 3.583192 |
| rs2510045      | USP35     | 11 | 77598211 | 4 | 1.020062 |
| rs2512527      | USP35     | 11 | 77598511 | 1 | 3.555327 |
| rs2512527      | USP35     | 11 | 77598511 | 4 | 0.473988 |
| SNP11-77598578 | USP35     | 11 | 77598578 | 1 | 4.505023 |
| SNP11-77598578 | USP35     | 11 | 77598578 | 4 | 0.771831 |
| rs2450138      | USP35     | 11 | 77602518 | 4 | 1.827957 |
| rs2450138      | USP35     | 11 | 77602518 | 1 | 4.622886 |
| rs1055250      | USP35     | 11 | 77603356 | 1 | 1.232003 |
| rs1055250      | USP35     | 11 | 77603356 | 4 | 0.353984 |
| rs2248407      | GAB2      | 11 | 77615448 | 1 | 5.390025 |
| rs2248407      | GAB2      | 11 | 77615448 | 4 | 4.815573 |
| rs2292572      | GAB2      | 11 | 77730512 | 1 | 4.531417 |
| rs2292572      | GAB2      | 11 | 77730512 | 4 | 0.123479 |
| rs10501429     | NARS2     | 11 | 77957438 | 1 | 0.291485 |
| rs10501429     | NARS2     | 11 | 77957438 | 4 | 1.589635 |
| rs10501429     | NARS2     | 11 | 77957438 | 5 | 8.458336 |
| rs585747       | LOC646112 | 11 | 79377793 | 1 | 2.085808 |
| rs585747       | LOC646112 | 11 | 79377793 | 3 | 2.407179 |
| rs585747       | LOC646112 | 11 | 79377793 | 5 | 2.246855 |
| rs585747       | LOC646112 | 11 | 79377793 | 8 | 1.930518 |
| rs2291793      | MGC33846  | 11 | 82121465 | 3 | 3.811129 |
| rs2291793      | MGC33846  | 11 | 82121465 | 8 | 0.696259 |
| rs2291793      | MGC33846  | 11 | 82121465 | 6 | 2.968682 |
| rs2291793      | MGC33846  | 11 | 82121465 | 7 | 2.707129 |
| SNP11-82303462 | C11orf82  | 11 | 82303462 | 5 | 0.051296 |
| rs11826199     | C11orf82  | 11 | 82322412 | 7 | 4.41721  |
| rs11826199     | C11orf82  | 11 | 82322412 | 6 | 4.208806 |
| rs11601610     | RAB30     | 11 | 82370170 | 4 | 0.211441 |
| rs12284052     | PCF11     | 11 | 82557989 | 6 | 5.038976 |
| rs557913       | LOC729964 | 11 | 82598706 | 4 | 3.683575 |
| rs557913       | LOC729964 | 11 | 82598706 | 8 | 2.793393 |
| rs557913       | LOC729964 | 11 | 82598706 | 6 | 7.408422 |
| rs646348       | CCDC90B   | 11 | 82650652 | 2 | 1.468188 |
| rs646348       | CCDC90B   | 11 | 82650652 | 4 | 0.844399 |
| rs646348       | CCDC90B   | 11 | 82650652 | 5 | 0.277376 |
| rs646348       | CCDC90B   | 11 | 82650652 | 6 | 0.250237 |
| rs646348       | CCDC90B   | 11 | 82650652 | 1 | 0.180218 |
| rs2512676      | DLG2      | 11 | 82844368 | 1 | 0.692939 |
| rs1991923      | CREBZF    | 11 | 85046846 | 4 | 4.576534 |
| rs1237203      | CCDC89    | 11 | 85072828 | 1 | 3.012892 |
| rs290185       | CCDC89    | 11 | 85073366 | 5 | 0.313307 |
| rs290185       | CCDC89    | 11 | 85073366 | 8 | 5.458645 |
| rs290185       | CCDC89    | 11 | 85073366 | 4 | 2.412308 |
| rs290185       | CCDC89    | 11 | 85073366 | 1 | 5.06026  |

|                |           |    |          |   |          |
|----------------|-----------|----|----------|---|----------|
| SNP11-85114000 | SYTL2     | 11 | 85114000 | 8 | 0.018842 |
| SNP11-85114000 | SYTL2     | 11 | 85114000 | 4 | 0.146152 |
| SNP11-85114000 | SYTL2     | 11 | 85114000 | 1 | 5.153602 |
| SNP11-85114000 | SYTL2     | 11 | 85114000 | 5 | 6.498245 |
| SNP11-85114000 | SYTL2     | 11 | 85114000 | 6 | 5.163502 |
| rs17744245     | SYTL2     | 11 | 85126327 | 4 | 0.263647 |
| rs7927222      | CCDC83    | 11 | 85304756 | 3 | 0.513892 |
| rs12805520     | CCDC83    | 11 | 85308059 | 1 | 0.29576  |
| rs7118279      | CCDC83    | 11 | 85308485 | 1 | 0.240122 |
| rs7118279      | CCDC83    | 11 | 85308485 | 2 | 0.559699 |
| rs694353       | PICALM    | 11 | 85369829 | 5 | 0.331319 |
| rs694353       | PICALM    | 11 | 85369829 | 3 | 0.463602 |
| rs974144       | EED       | 11 | 85646271 | 3 | 0.59212  |
| rs974144       | EED       | 11 | 85646271 | 6 | 0.36423  |
| rs11234604     | C11orf73  | 11 | 85691028 | 3 | 0.161243 |
| rs3741005      | CCDC81    | 11 | 85801204 | 1 | 4.153796 |
| rs1056194      | CCDC81    | 11 | 85811432 | 3 | 0.982551 |
| rs1056194      | CCDC81    | 11 | 85811432 | 7 | 5.255199 |
| rs1056194      | CCDC81    | 11 | 85811432 | 4 | 0.727397 |
| rs11234648     | CCDC81    | 11 | 85811585 | 3 | 1.002428 |
| rs12287767     | ME3       | 11 | 85945362 | 7 | 0.737158 |
| rs12287767     | ME3       | 11 | 85945362 | 1 | 4.212014 |
| rs12287767     | ME3       | 11 | 85945362 | 3 | 0.484397 |
| rs10898563     | FZD4      | 11 | 86336861 | 8 | 1.977572 |
| rs10898563     | FZD4      | 11 | 86336861 | 5 | 0.889587 |
| rs3802892      | FZD4      | 11 | 86338534 | 3 | 0.711963 |
| rs3802892      | FZD4      | 11 | 86338534 | 2 | 3.557976 |
| rs3812730      | RAB38     | 11 | 87548211 | 3 | 1.294435 |
| rs3812730      | RAB38     | 11 | 87548211 | 6 | 0.634417 |
| rs11600158     | CTSC      | 11 | 87710562 | 5 | 0.701994 |
| rs16924538     | GAPDHL15  | 11 | 87782001 | 3 | 0.53815  |
| rs16924538     | GAPDHL15  | 11 | 87782001 | 4 | 0.805799 |
| rs16924538     | GAPDHL15  | 11 | 87782001 | 7 | 0.910096 |
| rs16924538     | GAPDHL15  | 11 | 87782001 | 5 | 0.394995 |
| rs1138531      | NAALAD2   | 11 | 89565060 | 1 | 4.494759 |
| rs1138531      | NAALAD2   | 11 | 89565060 | 4 | 0.976916 |
| rs1138531      | NAALAD2   | 11 | 89565060 | 7 | 0.47933  |
| rs1138531      | NAALAD2   | 11 | 89565060 | 5 | 0.269864 |
| rs1061470      | NAALAD2   | 11 | 89565410 | 1 | 0.520968 |
| rs1061470      | NAALAD2   | 11 | 89565410 | 2 | 2.688348 |
| rs1061470      | NAALAD2   | 11 | 89565410 | 8 | 2.099478 |
| rs1061470      | NAALAD2   | 11 | 89565410 | 6 | 0.541762 |
| SNP11-89595854 | CHORDC1   | 11 | 89595854 | 3 | 0.641666 |
| rs1458209      | LOC727998 | 11 | 91598124 | 3 | 0.264048 |
| rs1458209      | LOC727998 | 11 | 91598124 | 5 | 1.308051 |
| rs1458209      | LOC727998 | 11 | 91598124 | 8 | 1.578118 |
| rs1458209      | LOC727998 | 11 | 91598124 | 7 | 0.072591 |

|                |           |    |          |   |          |
|----------------|-----------|----|----------|---|----------|
| rs11823754     | FAT3      | 11 | 92265592 | 5 | 1.225205 |
| rs11823754     | FAT3      | 11 | 92265592 | 4 | 1.237345 |
| rs2197678      | FAT3      | 11 | 92266076 | 5 | 0.787832 |
| rs2197678      | FAT3      | 11 | 92266076 | 2 | 0.267307 |
| SNP11-92535568 | SLC36A4   | 11 | 92535568 | 5 | 0.111143 |
| rs3020061      | CCDC67    | 11 | 92702848 | 1 | 0.968345 |
| rs12282288     | CCDC67    | 11 | 92769132 | 5 | 0.874631 |
| rs7108501      | HEPHL1    | 11 | 93485000 | 3 | 1.56103  |
| rs7108501      | HEPHL1    | 11 | 93485000 | 1 | 4.171407 |
| rs7108501      | HEPHL1    | 11 | 93485000 | 6 | 0.114565 |
| rs7108501      | HEPHL1    | 11 | 93485000 | 4 | 2.940235 |
| rs7108501      | HEPHL1    | 11 | 93485000 | 8 | 1.964382 |
| rs7933565      | GPR83     | 11 | 93751456 | 1 | 2.08082  |
| rs7933565      | GPR83     | 11 | 93751456 | 3 | 0.74445  |
| rs7933565      | GPR83     | 11 | 93751456 | 4 | 0.047496 |
| rs2155209      | MRE11A    | 11 | 93790438 | 2 | 1.115959 |
| rs2155209      | MRE11A    | 11 | 93790438 | 8 | 5.761142 |
| rs2155209      | MRE11A    | 11 | 93790438 | 1 | 0.207778 |
| rs2155209      | MRE11A    | 11 | 93790438 | 4 | 0.426906 |
| SNP11-93866600 | MRE11A    | 11 | 93866600 | 5 | 3.658851 |
| SNP11-93866600 | MRE11A    | 11 | 93866600 | 6 | 1.84765  |
| rs647484       | LOC643037 | 11 | 93900903 | 8 | 5.790566 |
| rs10741490     | FUT4      | 11 | 93921662 | 5 | 0.245525 |
| rs7110167      | PIWIL4    | 11 | 93959885 | 7 | 0.359631 |
| rs7110167      | PIWIL4    | 11 | 93959885 | 2 | 0.088963 |
| rs7110167      | PIWIL4    | 11 | 93959885 | 1 | 0.508161 |
| rs7110167      | PIWIL4    | 11 | 93959885 | 5 | 0.292659 |
| rs7119735      | PIWIL4    | 11 | 93966358 | 3 | 0.818455 |
| rs7119735      | PIWIL4    | 11 | 93966358 | 2 | 3.955772 |
| SNP11-93966413 | PIWIL4    | 11 | 93966413 | 3 | 0.124576 |
| SNP11-93966413 | PIWIL4    | 11 | 93966413 | 6 | 1.423484 |
| SNP11-93966413 | PIWIL4    | 11 | 93966413 | 1 | 3.973573 |
| SNP11-93966413 | PIWIL4    | 11 | 93966413 | 4 | 4.427902 |
| rs593690       | PIWIL4    | 11 | 93976868 | 6 | 0.622986 |
| rs593690       | PIWIL4    | 11 | 93976868 | 1 | 0.326575 |
| rs593690       | PIWIL4    | 11 | 93976868 | 3 | 0.027767 |
| rs593690       | PIWIL4    | 11 | 93976868 | 4 | 0.246858 |
| rs593690       | PIWIL4    | 11 | 93976868 | 5 | 0.120449 |
| rs593690       | PIWIL4    | 11 | 93976868 | 2 | 0.503865 |
| rs593690       | PIWIL4    | 11 | 93976868 | 7 | 0.167323 |
| rs3740853      | JMJD2D    | 11 | 94371407 | 3 | 0.619183 |
| rs3740853      | JMJD2D    | 11 | 94371407 | 4 | 1.203863 |
| rs16921265     | LOC390245 | 11 | 94398486 | 8 | 1.958007 |
| rs12275165     | CEP57     | 11 | 95205488 | 2 | 4.673575 |
| rs16922613     | MTMR2     | 11 | 95205696 | 5 | 0.367226 |
| rs7123272      | MAML2     | 11 | 95352672 | 5 | 0.678001 |
| rs11021542     | MAML2     | 11 | 95715937 | 5 | 5.469197 |

|                |          |    |           |   |          |
|----------------|----------|----|-----------|---|----------|
| rs543146       | FLJ32810 | 11 | 100319780 | 1 | 0.650903 |
| rs543146       | FLJ32810 | 11 | 100319780 | 2 | 1.132655 |
| rs569336       | FLJ32810 | 11 | 100352279 | 4 | 0.855807 |
| rs569336       | FLJ32810 | 11 | 100352279 | 2 | 3.755015 |
| rs569336       | FLJ32810 | 11 | 100352279 | 1 | 0.011981 |
| rs1047624      | TMEM133  | 11 | 100368943 | 5 | 4.765356 |
| rs17654386     | TMEM133  | 11 | 100369024 | 5 | 0.302715 |
| rs17654410     | TMEM133  | 11 | 100369356 | 5 | 0.773553 |
| rs500760       | PGR      | 11 | 100415201 | 3 | 0.801701 |
| rs1042838      | PGR      | 11 | 100438622 | 2 | 0.004062 |
| rs1042838      | PGR      | 11 | 100438622 | 5 | 0.008911 |
| rs7105709      | ANGPTL5  | 11 | 101292322 | 5 | 0.956992 |
| rs7105709      | ANGPTL5  | 11 | 101292322 | 2 | 4.58918  |
| rs7105709      | ANGPTL5  | 11 | 101292322 | 3 | 1.012625 |
| rs7105709      | ANGPTL5  | 11 | 101292322 | 4 | 0.424621 |
| rs7105709      | ANGPTL5  | 11 | 101292322 | 7 | 0.205334 |
| rs7105709      | ANGPTL5  | 11 | 101292322 | 6 | 0.266203 |
| SNP11-10133421 | KIAA1377 | 11 | 101334216 | 8 | 0.529349 |
| rs11225089     | KIAA1377 | 11 | 101337800 | 5 | 9.68056  |
| rs11225091     | KIAA1377 | 11 | 101337880 | 5 | 0.692274 |
| rs3740930      | KIAA1377 | 11 | 101337918 | 3 | 0.192489 |
| rs11225174     | YAP1     | 11 | 101607156 | 5 | 0.99144  |
| rs11225174     | YAP1     | 11 | 101607156 | 6 | 5.820054 |
| rs484068       | TMEM123  | 11 | 101773737 | 1 | 4.566735 |
| rs484068       | TMEM123  | 11 | 101773737 | 5 | 0.203043 |
| rs484068       | TMEM123  | 11 | 101773737 | 3 | 0.546736 |
| rs485020       | TMEM123  | 11 | 101773838 | 1 | 4.354529 |
| rs485020       | TMEM123  | 11 | 101773838 | 3 | 0.52872  |
| rs1784424      | MMP20    | 11 | 101982587 | 4 | 0.199233 |
| rs1784424      | MMP20    | 11 | 101982587 | 1 | 0.468958 |
| rs1784424      | MMP20    | 11 | 101982587 | 5 | 4.448846 |
| rs1784424      | MMP20    | 11 | 101982587 | 7 | 1.844884 |
| rs1784423      | MMP20    | 11 | 101982605 | 6 | 2.710102 |
| rs1784423      | MMP20    | 11 | 101982605 | 4 | 2.865874 |
| rs1784423      | MMP20    | 11 | 101982605 | 2 | 3.47948  |
| rs1784423      | MMP20    | 11 | 101982605 | 7 | 1.299618 |
| rs1784423      | MMP20    | 11 | 101982605 | 1 | 2.061799 |
| rs1784423      | MMP20    | 11 | 101982605 | 5 | 1.480465 |
| rs2509010      | MMP27    | 11 | 102067910 | 7 | 0.858974 |
| rs2509010      | MMP27    | 11 | 102067910 | 1 | 3.591887 |
| rs2509010      | MMP27    | 11 | 102067910 | 8 | 0.35455  |
| rs470168       | MMP10    | 11 | 102146592 | 5 | 7.90153  |
| rs470168       | MMP10    | 11 | 102146592 | 2 | 1.705229 |
| rs470168       | MMP10    | 11 | 102146592 | 6 | 0.803948 |
| rs470168       | MMP10    | 11 | 102146592 | 3 | 0.812477 |
| rs17359286     | MMP10    | 11 | 102148928 | 5 | 2.653793 |
| rs17293607     | MMP10    | 11 | 102155599 | 7 | 0.640709 |

|            |           |    |           |   |          |
|------------|-----------|----|-----------|---|----------|
| rs17435959 | MMP10     | 11 | 102156523 | 6 | 1.754824 |
| rs5854     | MMP1      | 11 | 102166084 | 2 | 1.307956 |
| rs5854     | MMP1      | 11 | 102166084 | 6 | 1.063095 |
| rs5854     | MMP1      | 11 | 102166084 | 3 | 0.754866 |
| rs2239008  | MMP1      | 11 | 102166290 | 8 | 4.580434 |
| rs2239008  | MMP1      | 11 | 102166290 | 3 | 1.476276 |
| rs470558   | MMP1      | 11 | 102171526 | 4 | 0.299753 |
| rs10488    | MMP1      | 11 | 102173232 | 4 | 0.616695 |
| rs10488    | MMP1      | 11 | 102173232 | 6 | 0.80473  |
| rs10488    | MMP1      | 11 | 102173232 | 7 | 2.239534 |
| rs2510091  | DCUN1D5   | 11 | 102468042 | 7 | 0.624193 |
| rs17301028 | DYNC2H1   | 11 | 102485534 | 2 | 8.224899 |
| rs12146610 | DYNC2H1   | 11 | 102493714 | 8 | 0.750421 |
| rs1053861  | PDGFD     | 11 | 103283364 | 4 | 0.748543 |
| rs1053861  | PDGFD     | 11 | 103283364 | 8 | 4.34672  |
| rs1053861  | PDGFD     | 11 | 103283364 | 7 | 0.526176 |
| rs11226057 | PDGFD     | 11 | 103284235 | 7 | 1.351129 |
| rs11226057 | PDGFD     | 11 | 103284235 | 8 | 0.253456 |
| rs10895534 | PDGFD     | 11 | 103285003 | 4 | 3.928059 |
| rs10895534 | PDGFD     | 11 | 103285003 | 8 | 0.475306 |
| rs1056205  | PDGFD     | 11 | 103285305 | 8 | 4.716636 |
| rs35045740 | PDGFD     | 11 | 103323605 | 4 | 5.738715 |
| rs2279789  | DDI1      | 11 | 103414178 | 3 | 2.450433 |
| rs2279789  | DDI1      | 11 | 103414178 | 1 | 1.778611 |
| rs2279789  | DDI1      | 11 | 103414178 | 5 | 1.670865 |
| rs523104   | CASP5     | 11 | 104374918 | 1 | 0.127372 |
| rs523104   | CASP5     | 11 | 104374918 | 2 | 0.872595 |
| rs523104   | CASP5     | 11 | 104374918 | 5 | 0.749214 |
| rs523104   | CASP5     | 11 | 104374918 | 3 | 0.248858 |
| rs507879   | CASP5     | 11 | 104383137 | 3 | 1.12145  |
| rs10895893 | KIAA1826  | 11 | 105397209 | 7 | 1.077171 |
| rs10895893 | KIAA1826  | 11 | 105397209 | 5 | 0.643873 |
| rs10895893 | KIAA1826  | 11 | 105397209 | 6 | 3.806563 |
| rs2236663  | KIAA1826  | 11 | 105397361 | 5 | 0.755333 |
| rs2236663  | KIAA1826  | 11 | 105397361 | 6 | 1.113803 |
| rs2236663  | KIAA1826  | 11 | 105397361 | 7 | 2.252743 |
| rs17093811 | KBTBD3    | 11 | 105427145 | 6 | 0.34741  |
| rs4754188  | LOC341230 | 11 | 106553206 | 7 | 0.876283 |
| rs4754188  | LOC341230 | 11 | 106553206 | 5 | 0.717861 |
| rs1046095  | CWF19L2   | 11 | 106702445 | 1 | 4.302009 |
| rs1046095  | CWF19L2   | 11 | 106702445 | 5 | 0.553049 |
| rs1046095  | CWF19L2   | 11 | 106702445 | 7 | 1.504731 |
| rs1046095  | CWF19L2   | 11 | 106702445 | 8 | 5.133224 |
| rs1046095  | CWF19L2   | 11 | 106702445 | 4 | 0.608668 |
| rs512574   | CWF19L2   | 11 | 106702529 | 1 | 4.45628  |
| rs630693   | CWF19L2   | 11 | 106702816 | 4 | 0.898076 |
| rs630693   | CWF19L2   | 11 | 106702816 | 5 | 0.199275 |

|                |          |    |           |   |          |
|----------------|----------|----|-----------|---|----------|
| rs630693       | CWF19L2  | 11 | 106702816 | 2 | 5.634277 |
| rs630693       | CWF19L2  | 11 | 106702816 | 8 | 6.393379 |
| SNP11-10680483 | CWF19L2  | 11 | 106804833 | 6 | 0.032916 |
| rs583362       | SLN      | 11 | 107083931 | 8 | 0.591159 |
| rs583362       | SLN      | 11 | 107083931 | 2 | 0.054904 |
| rs583362       | SLN      | 11 | 107083931 | 5 | 0.189296 |
| rs518073       | SLC35F2  | 11 | 107168051 | 2 | 2.469736 |
| rs518073       | SLC35F2  | 11 | 107168051 | 7 | 0.142032 |
| rs518073       | SLC35F2  | 11 | 107168051 | 8 | 8.188636 |
| rs518073       | SLC35F2  | 11 | 107168051 | 5 | 0.330691 |
| rs516091       | SLC35F2  | 11 | 107168313 | 6 | 1.417726 |
| rs516091       | SLC35F2  | 11 | 107168313 | 8 | 0.930999 |
| rs516091       | SLC35F2  | 11 | 107168313 | 3 | 0.305935 |
| rs516091       | SLC35F2  | 11 | 107168313 | 5 | 0.387936 |
| rs516091       | SLC35F2  | 11 | 107168313 | 2 | 10.27461 |
| rs516091       | SLC35F2  | 11 | 107168313 | 7 | 0.090645 |
| rs3741065      | SLC35F2  | 11 | 107234771 | 5 | 0.854508 |
| rs3741065      | SLC35F2  | 11 | 107234771 | 8 | 1.716172 |
| rs3741065      | SLC35F2  | 11 | 107234771 | 1 | 1.378671 |
| rs3741065      | SLC35F2  | 11 | 107234771 | 3 | 1.346898 |
| rs2442683      | SLC35F2  | 11 | 107234825 | 5 | 2.438372 |
| rs2442683      | SLC35F2  | 11 | 107234825 | 3 | 1.186562 |
| rs2442683      | SLC35F2  | 11 | 107234825 | 1 | 0.913171 |
| rs2442683      | SLC35F2  | 11 | 107234825 | 7 | 0.004854 |
| rs2442683      | SLC35F2  | 11 | 107234825 | 8 | 0.856735 |
| rs4754282      | RAB39    | 11 | 107338755 | 3 | 1.968358 |
| rs7117111      | CUL5     | 11 | 107422297 | 5 | 0.189844 |
| rs4144901      | NPAT     | 11 | 107549301 | 6 | 0.227885 |
| rs4144901      | NPAT     | 11 | 107549301 | 7 | 0.180973 |
| rs4144901      | NPAT     | 11 | 107549301 | 8 | 0.135139 |
| rs609261       | ATM      | 11 | 107663344 | 2 | 2.590494 |
| rs609261       | ATM      | 11 | 107663344 | 7 | 0.759204 |
| rs609261       | ATM      | 11 | 107663344 | 5 | 0.348667 |
| rs609261       | ATM      | 11 | 107663344 | 6 | 0.709891 |
| rs664143       | C11orf65 | 11 | 107730871 | 7 | 1.146977 |
| rs664143       | C11orf65 | 11 | 107730871 | 8 | 4.739764 |
| rs664143       | C11orf65 | 11 | 107730871 | 6 | 1.791475 |
| rs664143       | C11orf65 | 11 | 107730871 | 5 | 0.764801 |
| rs664143       | C11orf65 | 11 | 107730871 | 2 | 4.947237 |
| rs2640785      | EXPH5    | 11 | 107914994 | 6 | 3.479448 |
| rs2640785      | EXPH5    | 11 | 107914994 | 2 | 3.348097 |
| rs2640785      | EXPH5    | 11 | 107914994 | 5 | 0.423516 |
| rs7936226      | ARHGAP20 | 11 | 109959548 | 7 | 0.991403 |
| rs11213821     | FLJ45803 | 11 | 110669861 | 1 | 0.321635 |
| rs11213821     | FLJ45803 | 11 | 110669861 | 6 | 0.228432 |
| rs11213821     | FLJ45803 | 11 | 110669861 | 2 | 1.490986 |
| rs11213821     | FLJ45803 | 11 | 110669861 | 3 | 0.589085 |



|            |           |    |           |   |          |
|------------|-----------|----|-----------|---|----------|
| rs6589218  | FLJ45803  | 11 | 110672767 | 4 | 0.266782 |
| rs6589218  | FLJ45803  | 11 | 110672767 | 1 | 0.852497 |
| rs10244    | FLJ45803  | 11 | 110674320 | 5 | 0.172832 |
| rs1046872  | LOC120376 | 11 | 110684600 | 1 | 5.330492 |
| rs1046872  | LOC120376 | 11 | 110684600 | 3 | 0.171748 |
| rs1046872  | LOC120376 | 11 | 110684600 | 7 | 0.975507 |
| rs1046872  | LOC120376 | 11 | 110684600 | 6 | 0.699501 |
| rs1046872  | LOC120376 | 11 | 110684600 | 4 | 5.224811 |
| rs1042752  | POU2AF1   | 11 | 110728321 | 7 | 0.264978 |
| rs1042752  | POU2AF1   | 11 | 110728321 | 1 | 0.70544  |
| rs1042752  | POU2AF1   | 11 | 110728321 | 2 | 0.796441 |
| rs542275   | LAYN      | 11 | 110936824 | 8 | 0.925164 |
| rs542275   | LAYN      | 11 | 110936824 | 7 | 0.83422  |
| rs542275   | LAYN      | 11 | 110936824 | 1 | 1.0785   |
| rs647080   | PPP2R1B   | 11 | 111114384 | 1 | 5.889512 |
| rs647080   | PPP2R1B   | 11 | 111114384 | 4 | 3.496936 |
| rs10502151 | ALG9      | 11 | 111229343 | 5 | 0.095017 |
| rs10502151 | ALG9      | 11 | 111229343 | 8 | 2.983204 |
| rs10502151 | ALG9      | 11 | 111229343 | 4 | 0.597826 |
| rs4252588  | HSPB2     | 11 | 111289439 | 4 | 4.472651 |
| rs4252590  | HSPB2     | 11 | 111290026 | 1 | 4.140631 |
| rs11214077 | SDHD      | 11 | 111463887 | 1 | 1.976582 |
| rs360712   | TEX12     | 11 | 111545237 | 1 | 0.071547 |
| rs360712   | TEX12     | 11 | 111545237 | 2 | 0.727935 |
| rs360712   | TEX12     | 11 | 111545237 | 5 | 0.004026 |
| rs2564872  | C11orf34  | 11 | 111628305 | 5 | 4.065214 |
| rs2564872  | C11orf34  | 11 | 111628305 | 1 | 5.100149 |
| rs2564872  | C11orf34  | 11 | 111628305 | 4 | 1.137281 |
| rs2518369  | LOC399950 | 11 | 111644045 | 5 | 1.585574 |
| rs2518369  | LOC399950 | 11 | 111644045 | 1 | 2.41385  |
| rs2518369  | LOC399950 | 11 | 111644045 | 6 | 0.794146 |
| rs584427   | NCAM1     | 11 | 112609206 | 7 | 0.180748 |
| rs584427   | NCAM1     | 11 | 112609206 | 8 | 2.161981 |
| rs584427   | NCAM1     | 11 | 112609206 | 6 | 0.341967 |
| rs584427   | NCAM1     | 11 | 112609206 | 2 | 2.208604 |
| rs584427   | NCAM1     | 11 | 112609206 | 3 | 0.743642 |
| rs635903   | NCAM1     | 11 | 112651995 | 3 | 0.934132 |
| rs635903   | NCAM1     | 11 | 112651995 | 8 | 0.46927  |
| rs17115439 | ANKK1     | 11 | 112769482 | 7 | 0.403164 |
| rs17115439 | ANKK1     | 11 | 112769482 | 3 | 0.857964 |
| rs17115439 | ANKK1     | 11 | 112769482 | 5 | 0.954953 |
| rs17115439 | ANKK1     | 11 | 112769482 | 2 | 3.517488 |
| rs4938013  | ANKK1     | 11 | 112769680 | 3 | 1.150701 |
| rs4938013  | ANKK1     | 11 | 112769680 | 7 | 0.362817 |
| rs4938013  | ANKK1     | 11 | 112769680 | 2 | 3.132026 |
| rs7118900  | ANKK1     | 11 | 112772031 | 7 | 0.012533 |
| rs7118900  | ANKK1     | 11 | 112772031 | 3 | 0.238539 |

|                |           |    |           |   |          |
|----------------|-----------|----|-----------|---|----------|
| rs4938016      | ANKK1     | 11 | 112775225 | 5 | 0.066928 |
| rs2734849      | ANKK1     | 11 | 112775370 | 7 | 0.328685 |
| rs2734849      | ANKK1     | 11 | 112775370 | 5 | 0.322701 |
| rs2734849      | ANKK1     | 11 | 112775370 | 3 | 0.587081 |
| rs2734849      | ANKK1     | 11 | 112775370 | 4 | 0.566653 |
| rs6278         | DRD2      | 11 | 112785934 | 2 | 4.386745 |
| rs6278         | DRD2      | 11 | 112785934 | 3 | 0.754757 |
| rs6278         | DRD2      | 11 | 112785934 | 7 | 0.587044 |
| rs6279         | DRD2      | 11 | 112786283 | 4 | 0.486801 |
| rs6279         | DRD2      | 11 | 112786283 | 5 | 0.46296  |
| rs6277         | DRD2      | 11 | 112788669 | 2 | 2.263823 |
| rs6277         | DRD2      | 11 | 112788669 | 3 | 0.705914 |
| rs6277         | DRD2      | 11 | 112788669 | 4 | 0.006368 |
| rs6277         | DRD2      | 11 | 112788669 | 5 | 1.00699  |
| rs6277         | DRD2      | 11 | 112788669 | 7 | 0.746082 |
| rs1800499      | DRD2      | 11 | 112792904 | 8 | 3.159615 |
| rs17115826     | TMPRSS5   | 11 | 113064055 | 5 | 6.601131 |
| rs17115841     | TMPRSS5   | 11 | 113070532 | 5 | 1.236249 |
| rs11601425     | TMPRSS5   | 11 | 113075595 | 4 | 0.317065 |
| rs11601425     | TMPRSS5   | 11 | 113075595 | 3 | 2.422745 |
| rs3802854      | TMPRSS5   | 11 | 113076062 | 2 | 0.30754  |
| rs3802854      | TMPRSS5   | 11 | 113076062 | 1 | 0.274953 |
| rs3802854      | TMPRSS5   | 11 | 113076062 | 5 | 1.613693 |
| rs3802854      | TMPRSS5   | 11 | 113076062 | 3 | 0.742734 |
| rs1713676      | LOC390251 | 11 | 113165786 | 2 | 1.744417 |
| rs1713676      | LOC390251 | 11 | 113165786 | 7 | 2.365254 |
| rs1713676      | LOC390251 | 11 | 113165786 | 1 | 2.681814 |
| rs1633550      | USP28     | 11 | 113174415 | 4 | 0.41443  |
| rs1633550      | USP28     | 11 | 113174415 | 3 | 0.006817 |
| rs1062613      | HTR3A     | 11 | 113351216 | 1 | 2.129049 |
| rs1062613      | HTR3A     | 11 | 113351216 | 4 | 0.134032 |
| rs17629751     | C11orf71  | 11 | 113776432 | 5 | 1.170337 |
| rs17629751     | C11orf71  | 11 | 113776432 | 3 | 1.327701 |
| rs7944960      | FAM55A    | 11 | 113906821 | 1 | 1.025386 |
| rs7944960      | FAM55A    | 11 | 113906821 | 8 | 1.499997 |
| rs10891705     | FAM55D    | 11 | 113947153 | 1 | 3.024857 |
| rs11215158     | FAM55B    | 11 | 114074152 | 6 | 2.234575 |
| rs1712838      | FAM55B    | 11 | 114074264 | 6 | 1.346838 |
| rs1712838      | FAM55B    | 11 | 114074264 | 2 | 2.432236 |
| rs11820589     | BUD13     | 11 | 116139072 | 4 | 0.50531  |
| rs11820589     | BUD13     | 11 | 116139072 | 2 | 4.882337 |
| SNP11-11616081 | ZNF259    | 11 | 116160810 | 4 | 0.433331 |
| rs619054       | APOA5     | 11 | 116166023 | 1 | 0.242092 |
| rs619054       | APOA5     | 11 | 116166023 | 3 | 0.080717 |
| rs12225230     | KIAA0999  | 11 | 116233840 | 6 | 7.745255 |
| rs12225230     | KIAA0999  | 11 | 116233840 | 1 | 6.33339  |
| rs2305830      | CEP164    | 11 | 116771522 | 2 | 4.48342  |

|            |          |    |           |   |          |
|------------|----------|----|-----------|---|----------|
| rs2305830  | CEP164   | 11 | 116771522 | 4 | 0.696033 |
| rs2305830  | CEP164   | 11 | 116771522 | 7 | 0.34243  |
| rs521099   | CEP164   | 11 | 116788189 | 3 | 0.208527 |
| rs3741283  | DSCAML1  | 11 | 116804249 | 5 | 1.908078 |
| rs35503235 | DSCAML1  | 11 | 116897320 | 5 | 0.933407 |
| rs11999    | FXVD2    | 11 | 117196128 | 3 | 0.873266 |
| rs11999    | FXVD2    | 11 | 117196128 | 4 | 0.417433 |
| rs11999    | FXVD2    | 11 | 117196128 | 1 | 2.214332 |
| rs869789   | FXVD2    | 11 | 117196596 | 1 | 1.785699 |
| rs869789   | FXVD2    | 11 | 117196596 | 5 | 0.76032  |
| rs7117314  | FXVD2    | 11 | 117203972 | 6 | 0.702589 |
| rs7117314  | FXVD2    | 11 | 117203972 | 7 | 0.422375 |
| rs7117314  | FXVD2    | 11 | 117203972 | 8 | 1.548554 |
| rs520333   | FXVD6    | 11 | 117213835 | 7 | 1.395826 |
| rs520333   | FXVD6    | 11 | 117213835 | 8 | 4.584275 |
| rs520333   | FXVD6    | 11 | 117213835 | 2 | 4.646197 |
| rs520333   | FXVD6    | 11 | 117213835 | 6 | 0.271752 |
| rs520333   | FXVD6    | 11 | 117213835 | 4 | 5.46994  |
| rs520333   | FXVD6    | 11 | 117213835 | 5 | 1.198481 |
| rs520333   | FXVD6    | 11 | 117213835 | 3 | 0.316428 |
| rs575535   | TMPRSS13 | 11 | 117277439 | 5 | 0.869458 |
| rs575535   | TMPRSS13 | 11 | 117277439 | 3 | 0.857826 |
| rs575535   | TMPRSS13 | 11 | 117277439 | 6 | 6.943379 |
| rs575535   | TMPRSS13 | 11 | 117277439 | 7 | 3.370086 |
| rs491822   | TMPRSS13 | 11 | 117278058 | 6 | 3.697568 |
| rs491822   | TMPRSS13 | 11 | 117278058 | 7 | 0.002664 |
| rs491822   | TMPRSS13 | 11 | 117278058 | 3 | 0.891308 |
| rs10892196 | TMPRSS13 | 11 | 117305293 | 5 | 4.597755 |
| rs10892196 | TMPRSS13 | 11 | 117305293 | 4 | 0.388721 |
| rs10892196 | TMPRSS13 | 11 | 117305293 | 3 | 1.54384  |
| rs2256111  | IL10RA   | 11 | 117369257 | 5 | 0.590878 |
| rs2256111  | IL10RA   | 11 | 117369257 | 6 | 1.446544 |
| rs3135932  | IL10RA   | 11 | 117369273 | 8 | 1.385113 |
| rs3135932  | IL10RA   | 11 | 117369273 | 5 | 1.296379 |
| rs2228054  | IL10RA   | 11 | 117369323 | 2 | 2.72766  |
| rs2228054  | IL10RA   | 11 | 117369323 | 3 | 1.674513 |
| rs17121493 | IL10RA   | 11 | 117370056 | 3 | 0.302092 |
| rs2229114  | IL10RA   | 11 | 117375088 | 5 | 0.625835 |
| rs9610     | IL10RA   | 11 | 117377296 | 8 | 0.329806 |
| rs9610     | IL10RA   | 11 | 117377296 | 5 | 1.416606 |
| rs7123209  | TMPRSS4  | 11 | 117493864 | 4 | 1.243704 |
| rs7123209  | TMPRSS4  | 11 | 117493864 | 7 | 0.546108 |
| rs1814964  | SCN4B    | 11 | 117512167 | 3 | 1.68301  |
| rs1814964  | SCN4B    | 11 | 117512167 | 7 | 0.324723 |
| rs1814964  | SCN4B    | 11 | 117512167 | 2 | 2.128958 |
| rs625464   | SCN2B    | 11 | 117538755 | 7 | 1.189981 |
| rs625464   | SCN2B    | 11 | 117538755 | 1 | 0.441994 |

|                |           |    |           |   |          |
|----------------|-----------|----|-----------|---|----------|
| rs625464       | SCN2B     | 11 | 117538755 | 4 | 3.361331 |
| rs625464       | SCN2B     | 11 | 117538755 | 8 | 1.691382 |
| rs11216788     | SCN2B     | 11 | 117539411 | 7 | 1.511763 |
| rs11216788     | SCN2B     | 11 | 117539411 | 4 | 0.508666 |
| rs11216788     | SCN2B     | 11 | 117539411 | 1 | 0.170732 |
| rs11216788     | SCN2B     | 11 | 117539411 | 8 | 0.371043 |
| rs11216788     | SCN2B     | 11 | 117539411 | 5 | 1.078933 |
| rs688911       | SCN2B     | 11 | 117541742 | 7 | 0.729777 |
| rs688911       | SCN2B     | 11 | 117541742 | 8 | 0.118775 |
| rs676685       | SCN2B     | 11 | 117542152 | 7 | 0.738321 |
| rs676685       | SCN2B     | 11 | 117542152 | 5 | 3.106035 |
| rs676685       | SCN2B     | 11 | 117542152 | 4 | 1.715441 |
| rs676685       | SCN2B     | 11 | 117542152 | 1 | 2.38218  |
| rs676685       | SCN2B     | 11 | 117542152 | 8 | 1.994284 |
| rs2298831      | AMICA1    | 11 | 117573962 | 6 | 1.269362 |
| rs17121881     | AMICA1    | 11 | 117586555 | 2 | 1.170259 |
| rs17121881     | AMICA1    | 11 | 117586555 | 6 | 0.487492 |
| rs17121881     | AMICA1    | 11 | 117586555 | 4 | 0.538654 |
| rs17121881     | AMICA1    | 11 | 117586555 | 8 | 0.012011 |
| rs2853006      | MPZL3     | 11 | 117616187 | 3 | 1.000028 |
| rs2853006      | MPZL3     | 11 | 117616187 | 8 | 3.243188 |
| rs2853006      | MPZL3     | 11 | 117616187 | 4 | 0.682964 |
| rs9332871      | MLL       | 11 | 117899066 | 1 | 5.150269 |
| rs12289253     | TMEM25    | 11 | 117910278 | 6 | 2.36955  |
| rs12289253     | TMEM25    | 11 | 117910278 | 4 | 0.171345 |
| rs3741324      | TMEM25    | 11 | 117911045 | 6 | 0.85508  |
| rs3741324      | TMEM25    | 11 | 117911045 | 2 | 3.656727 |
| rs2277291      | C11orf60  | 11 | 117940966 | 4 | 0.22931  |
| rs2277291      | C11orf60  | 11 | 117940966 | 6 | 1.159089 |
| rs10892245     | ARCN1     | 11 | 117977564 | 4 | 0.877467 |
| rs10892245     | ARCN1     | 11 | 117977564 | 2 | 3.335381 |
| GA028457       | ARCN1     | 11 | 117978212 | 5 | 0.387328 |
| rs498872       | PHLDB1    | 11 | 117982577 | 6 | 0.739042 |
| rs498872       | PHLDB1    | 11 | 117982577 | 3 | 0.865995 |
| rs10892246     | LOC729024 | 11 | 117986641 | 3 | 0.44812  |
| rs35435609     | PHLDB1    | 11 | 118007382 | 2 | 0.732322 |
| rs483598       | PHLDB1    | 11 | 118014878 | 5 | 2.404009 |
| rs483598       | PHLDB1    | 11 | 118014878 | 4 | 1.513565 |
| rs483598       | PHLDB1    | 11 | 118014878 | 6 | 0.348697 |
| rs483598       | PHLDB1    | 11 | 118014878 | 8 | 0.336529 |
| rs483598       | PHLDB1    | 11 | 118014878 | 7 | 0.68438  |
| rs483598       | PHLDB1    | 11 | 118014878 | 1 | 4.46919  |
| rs7928371      | TREH      | 11 | 118034337 | 3 | 2.240631 |
| rs7928371      | TREH      | 11 | 118034337 | 4 | 0.730308 |
| SNP11-11803582 | TREH      | 11 | 118035821 | 4 | 3.023703 |
| SNP11-11803582 | TREH      | 11 | 118035821 | 7 | 2.261808 |
| SNP11-11803582 | TREH      | 11 | 118035821 | 3 | 2.571458 |

|                |         |    |           |   |          |
|----------------|---------|----|-----------|---|----------|
| rs598207       | BLR1    | 11 | 118270477 | 5 | 0.83117  |
| rs598207       | BLR1    | 11 | 118270477 | 4 | 0.003977 |
| rs598207       | BLR1    | 11 | 118270477 | 2 | 0.936157 |
| rs598207       | BLR1    | 11 | 118270477 | 3 | 0.741757 |
| rs598207       | BLR1    | 11 | 118270477 | 7 | 0.58119  |
| rs3922         | BLR1    | 11 | 118270810 | 1 | 0.160343 |
| rs3922         | BLR1    | 11 | 118270810 | 5 | 1.917351 |
| rs3922         | BLR1    | 11 | 118270810 | 3 | 0.496396 |
| rs3922         | BLR1    | 11 | 118270810 | 7 | 0.168458 |
| rs676925       | BLR1    | 11 | 118270898 | 8 | 0.568664 |
| rs676925       | BLR1    | 11 | 118270898 | 3 | 0.151314 |
| rs676925       | BLR1    | 11 | 118270898 | 7 | 1.067    |
| rs676925       | BLR1    | 11 | 118270898 | 5 | 0.131725 |
| rs676925       | BLR1    | 11 | 118270898 | 1 | 0.989535 |
| rs676925       | BLR1    | 11 | 118270898 | 4 | 0.142945 |
| rs2846281      | SLC37A4 | 11 | 118406376 | 1 | 0.089199 |
| rs2846281      | SLC37A4 | 11 | 118406376 | 5 | 1.923104 |
| rs13929        | HYOU1   | 11 | 118420965 | 7 | 6.461143 |
| rs13929        | HYOU1   | 11 | 118420965 | 1 | 5.526747 |
| rs13929        | HYOU1   | 11 | 118420965 | 4 | 0.612308 |
| rs1784302      | VPS11   | 11 | 118446167 | 7 | 0.156848 |
| rs1784302      | VPS11   | 11 | 118446167 | 1 | 0.655087 |
| rs1784302      | VPS11   | 11 | 118446167 | 4 | 0.678751 |
| rs1784302      | VPS11   | 11 | 118446167 | 5 | 0.138548 |
| rs540261       | VPS11   | 11 | 118452844 | 5 | 5.53523  |
| rs540261       | VPS11   | 11 | 118452844 | 7 | 1.160846 |
| rs540261       | VPS11   | 11 | 118452844 | 1 | 5.151719 |
| rs540261       | VPS11   | 11 | 118452844 | 4 | 0.368531 |
| rs15818        | VPS11   | 11 | 118457383 | 1 | 0.526777 |
| rs15818        | VPS11   | 11 | 118457383 | 7 | 1.054223 |
| rs15818        | VPS11   | 11 | 118457383 | 4 | 1.049786 |
| rs15818        | VPS11   | 11 | 118457383 | 2 | 1.903214 |
| rs643423       | NLRX1   | 11 | 118548866 | 4 | 0.858215 |
| rs643423       | NLRX1   | 11 | 118548866 | 2 | 2.238454 |
| rs1815811      | PDZD3   | 11 | 118564614 | 3 | 0.364084 |
| rs11604328     | CBL     | 11 | 118679786 | 1 | 4.638683 |
| rs11604328     | CBL     | 11 | 118679786 | 3 | 0.398928 |
| rs11604328     | CBL     | 11 | 118679786 | 7 | 0.030945 |
| rs1052121      | CBL     | 11 | 118683260 | 5 | 4.599022 |
| rs1052121      | CBL     | 11 | 118683260 | 3 | 0.027874 |
| rs1052121      | CBL     | 11 | 118683260 | 7 | 0.20722  |
| rs1052121      | CBL     | 11 | 118683260 | 1 | 3.010401 |
| SNP11-11869088 | MCAM    | 11 | 118690887 | 5 | 0.373134 |
| SNP11-11869088 | MCAM    | 11 | 118690887 | 4 | 4.610629 |
| rs6649         | RNF26   | 11 | 118713138 | 2 | 4.267071 |
| rs587985       | USP2    | 11 | 118749305 | 1 | 4.006624 |
| rs587985       | USP2    | 11 | 118749305 | 5 | 0.506481 |

|                |           |    |           |   |          |
|----------------|-----------|----|-----------|---|----------|
| rs12280992     | LOC390255 | 11 | 119197667 | 3 | 0.491875 |
| rs542903       | LOC390255 | 11 | 119197873 | 4 | 3.830405 |
| rs542903       | LOC390255 | 11 | 119197873 | 6 | 3.601638 |
| rs11604169     | TRIM29    | 11 | 119491329 | 4 | 0.911201 |
| rs4936509      | LOC729173 | 11 | 119546654 | 5 | 1.199798 |
| rs4936509      | LOC729173 | 11 | 119546654 | 6 | 0.164724 |
| rs4936509      | LOC729173 | 11 | 119546654 | 3 | 1.015913 |
| SNP11-11960486 | OAF       | 11 | 119604868 | 3 | 5.151904 |
| rs2305013      | ARHGEF12  | 11 | 119845270 | 3 | 0.091276 |
| rs2230297      | GRIK4     | 11 | 120251084 | 8 | 0.356995 |
| rs35380371     | TBCEL     | 11 | 120434361 | 4 | 4.933968 |
| rs35507522     | TECTA     | 11 | 120478640 | 4 | 3.621932 |
| rs612969       | TECTA     | 11 | 120494545 | 8 | 0.41273  |
| rs612969       | TECTA     | 11 | 120494545 | 6 | 0.387618 |
| rs612969       | TECTA     | 11 | 120494545 | 7 | 0.93892  |
| rs536069       | TECTA     | 11 | 120501502 | 7 | 0.226185 |
| rs10502247     | TECTA     | 11 | 120504152 | 4 | 0.18138  |
| rs520805       | TECTA     | 11 | 120505984 | 8 | 1.012197 |
| rs586473       | TECTA     | 11 | 120505994 | 4 | 0.177316 |
| rs586473       | TECTA     | 11 | 120505994 | 7 | 1.13173  |
| rs2155369      | TECTA     | 11 | 120544020 | 3 | 1.340311 |
| rs4936621      | LOC283155 | 11 | 120738021 | 3 | 2.777407 |
| rs4936621      | LOC283155 | 11 | 120738021 | 4 | 2.775009 |
| rs2298813      | SORL1     | 11 | 120898894 | 1 | 6.837737 |
| rs2298813      | SORL1     | 11 | 120898894 | 4 | 5.196343 |
| rs2070045      | SORL1     | 11 | 120953300 | 3 | 0.632413 |
| rs7127978      | UBASH3B   | 11 | 122031711 | 2 | 1.445332 |
| rs7127978      | UBASH3B   | 11 | 122031711 | 3 | 0.184065 |
| rs7127978      | UBASH3B   | 11 | 122031711 | 5 | 0.960889 |
| rs7127978      | UBASH3B   | 11 | 122031711 | 6 | 3.567114 |
| rs872414       | UBASH3B   | 11 | 122170647 | 3 | 0.135938 |
| rs872414       | UBASH3B   | 11 | 122170647 | 7 | 0.038331 |
| rs1996841      | UBASH3B   | 11 | 122187321 | 3 | 0.117722 |
| rs11218828     | UBASH3B   | 11 | 122189565 | 3 | 0.353604 |
| rs1057704      | C11orf63  | 11 | 122335484 | 7 | 1.351025 |
| rs1057704      | C11orf63  | 11 | 122335484 | 3 | 0.370472 |
| rs1057704      | C11orf63  | 11 | 122335484 | 6 | 0.303844 |
| rs1057704      | C11orf63  | 11 | 122335484 | 1 | 0.795734 |
| rs1057704      | C11orf63  | 11 | 122335484 | 2 | 0.110949 |
| rs1057704      | C11orf63  | 11 | 122335484 | 5 | 2.552134 |
| rs7933723      | LOC341056 | 11 | 122393780 | 1 | 4.574534 |
| rs7933723      | LOC341056 | 11 | 122393780 | 4 | 1.621951 |
| rs7933723      | LOC341056 | 11 | 122393780 | 6 | 3.664544 |
| rs7933723      | LOC341056 | 11 | 122393780 | 7 | 4.191927 |
| rs7933723      | LOC341056 | 11 | 122393780 | 2 | 4.458663 |
| rs2276075      | HSPA8     | 11 | 122438012 | 8 | 4.991063 |
| rs2276075      | HSPA8     | 11 | 122438012 | 1 | 6.257876 |

|                |           |    |           |   |          |
|----------------|-----------|----|-----------|---|----------|
| rs2276077      | HSPA8     | 11 | 122438027 | 8 | 8.830704 |
| rs2276077      | HSPA8     | 11 | 122438027 | 1 | 4.205683 |
| rs2027767      | SCN3B     | 11 | 123005969 | 3 | 0.192725 |
| rs2027767      | SCN3B     | 11 | 123005969 | 1 | 2.674699 |
| rs2027767      | SCN3B     | 11 | 123005969 | 4 | 0.400178 |
| rs10400374     | SCN3B     | 11 | 123007971 | 8 | 0.734732 |
| rs1275085      | SCN3B     | 11 | 123018371 | 5 | 1.851372 |
| rs11825443     | ZNF202    | 11 | 123105107 | 7 | 0.600734 |
| rs7952150      | OR6M1     | 11 | 123181623 | 7 | 0.574538 |
| rs7952150      | OR6M1     | 11 | 123181623 | 3 | 0.474112 |
| rs10790610     | OR8D4     | 11 | 123282946 | 4 | 2.102339 |
| rs17759447     | OR10S1    | 11 | 123353274 | 5 | 0.375672 |
| rs17686210     | OR10S1    | 11 | 123353331 | 8 | 1.877913 |
| rs9326269      | LOH11CR2A | 11 | 123521950 | 7 | 5.694364 |
| rs9326269      | LOH11CR2A | 11 | 123521950 | 2 | 2.774271 |
| rs9326269      | LOH11CR2A | 11 | 123521950 | 3 | 0.240782 |
| rs3741107      | LOH11CR2A | 11 | 123522127 | 1 | 3.85883  |
| rs3741107      | LOH11CR2A | 11 | 123522127 | 3 | 0.158033 |
| rs2512167      | OR8G5     | 11 | 123640648 | 3 | 1.071347 |
| rs2512167      | OR8G5     | 11 | 123640648 | 5 | 2.122215 |
| rs4936919      | OR8D1     | 11 | 123685292 | 3 | 0.567899 |
| rs4057750      | OR8B4     | 11 | 123799587 | 4 | 3.08218  |
| SNP11-12403587 | SIAE      | 11 | 124035874 | 2 | 4.727011 |
| SNP11-12403587 | SIAE      | 11 | 124035874 | 4 | 5.762231 |
| SNP11-12403587 | SIAE      | 11 | 124035874 | 3 | 0.286475 |
| SNP11-12403587 | SIAE      | 11 | 124035874 | 8 | 4.59568  |
| rs12541        | ESAM      | 11 | 124128702 | 4 | 5.225204 |
| rs12792040     | ESAM      | 11 | 124129360 | 1 | 4.543924 |
| rs12792040     | ESAM      | 11 | 124129360 | 7 | 0.069957 |
| rs7933204      | ROBO3     | 11 | 124253047 | 4 | 0.416306 |
| rs12823        | ROBO4     | 11 | 124259821 | 1 | 4.225185 |
| SNP11-12427227 | ROBO4     | 11 | 124272277 | 8 | 0.810812 |
| rs3802904      | HEPN1     | 11 | 124294965 | 4 | 2.155521 |
| rs3802904      | HEPN1     | 11 | 124294965 | 2 | 3.583153 |
| rs3802904      | HEPN1     | 11 | 124294965 | 6 | 0.090976 |
| rs3802904      | HEPN1     | 11 | 124294965 | 5 | 0.479334 |
| rs10790716     | HEPACAM   | 11 | 124298926 | 3 | 1.057339 |
| rs3809054      | CCDC15    | 11 | 124329276 | 7 | 0.389257 |
| rs3809054      | CCDC15    | 11 | 124329276 | 5 | 0.001345 |
| rs3809054      | CCDC15    | 11 | 124329276 | 6 | 0.140243 |
| rs3809054      | CCDC15    | 11 | 124329276 | 1 | 3.587739 |
| rs3809054      | CCDC15    | 11 | 124329276 | 3 | 1.030095 |
| SNP11-12445260 | SLC37A2   | 11 | 124452606 | 8 | 9.608348 |
| SNP11-12445260 | SLC37A2   | 11 | 124452606 | 1 | 3.58627  |
| SNP11-12445260 | SLC37A2   | 11 | 124452606 | 3 | 0.49393  |
| rs7110840      | SLC37A2   | 11 | 124463536 | 3 | 0.399864 |
| rs7110840      | SLC37A2   | 11 | 124463536 | 5 | 1.203482 |

|                |           |    |           |   |          |
|----------------|-----------|----|-----------|---|----------|
| rs7110840      | SLC37A2   | 11 | 124463536 | 7 | 0.145196 |
| rs3802809      | SLC37A2   | 11 | 124463607 | 3 | 0.683543 |
| rs3802809      | SLC37A2   | 11 | 124463607 | 5 | 1.203842 |
| rs3802809      | SLC37A2   | 11 | 124463607 | 7 | 0.768086 |
| rs4936978      | SLC37A2   | 11 | 124464124 | 7 | 0.8911   |
| rs4936978      | SLC37A2   | 11 | 124464124 | 3 | 0.77706  |
| rs4936978      | SLC37A2   | 11 | 124464124 | 5 | 0.492915 |
| rs7108003      | LOC219854 | 11 | 124471683 | 5 | 1.122818 |
| rs7108003      | LOC219854 | 11 | 124471683 | 7 | 0.41466  |
| rs7108003      | LOC219854 | 11 | 124471683 | 3 | 0.354522 |
| rs2155666      | LOC219854 | 11 | 124477901 | 3 | 0.75255  |
| rs2155666      | LOC219854 | 11 | 124477901 | 7 | 1.155119 |
| rs2155666      | LOC219854 | 11 | 124477901 | 6 | 0.595709 |
| rs2155666      | LOC219854 | 11 | 124477901 | 5 | 0.557397 |
| rs7118508      | LOC219854 | 11 | 124478042 | 5 | 2.141069 |
| rs7118508      | LOC219854 | 11 | 124478042 | 8 | 0.364904 |
| rs7118508      | LOC219854 | 11 | 124478042 | 7 | 1.320127 |
| rs645172       | PKNOX2    | 11 | 124807932 | 7 | 0.752264 |
| rs645172       | PKNOX2    | 11 | 124807932 | 3 | 0.271707 |
| rs531312       | FEZ1      | 11 | 124863800 | 6 | 0.70833  |
| rs2241502      | STT3A     | 11 | 124984573 | 4 | 0.448418 |
| rs506504       | CHEK1     | 11 | 125030405 | 6 | 0.218066 |
| rs2114084      | PATE      | 11 | 125122820 | 4 | 0.266827 |
| rs2114084      | PATE      | 11 | 125122820 | 5 | 0.122451 |
| rs2114084      | PATE      | 11 | 125122820 | 3 | 1.052101 |
| rs2114084      | PATE      | 11 | 125122820 | 1 | 0.383072 |
| rs1054997      | PATE      | 11 | 125124023 | 6 | 1.632307 |
| rs1056417      | PATE      | 11 | 125124788 | 5 | 0.630758 |
| rs1056417      | PATE      | 11 | 125124788 | 6 | 2.691816 |
| rs1056417      | PATE      | 11 | 125124788 | 1 | 0.757693 |
| rs4937035      | C11orf38  | 11 | 125151433 | 1 | 0.810807 |
| rs484670       | C11orf38  | 11 | 125151496 | 5 | 0.15578  |
| rs484670       | C11orf38  | 11 | 125151496 | 4 | 1.341001 |
| rs484670       | C11orf38  | 11 | 125151496 | 1 | 0.773642 |
| rs12224646     | FLJ41047  | 11 | 125213503 | 2 | 0.966876 |
| rs12224646     | FLJ41047  | 11 | 125213503 | 1 | 0.665322 |
| rs10893435     | FLJ41047  | 11 | 125213995 | 4 | 0.331385 |
| rs11220237     | FLJ41047  | 11 | 125214047 | 4 | 1.382327 |
| rs7110718      | FLJ41047  | 11 | 125214220 | 3 | 0.031945 |
| rs3862621      | FLJ41047  | 11 | 125214437 | 3 | 0.835736 |
| rs3851106      | FLJ41047  | 11 | 125214634 | 7 | 1.141885 |
| rs3851106      | FLJ41047  | 11 | 125214634 | 3 | 1.501171 |
| SNP11-12527073 | PUS3      | 11 | 125270738 | 2 | 8.103459 |
| rs600761       | PUS3      | 11 | 125271414 | 7 | 4.980257 |
| rs483216       | LOC338667 | 11 | 125323447 | 7 | 1.282024 |
| rs635346       | LOC338667 | 11 | 125323615 | 1 | 0.837903 |
| rs635346       | LOC338667 | 11 | 125323615 | 3 | 0.68476  |



|            |           |    |           |   |          |
|------------|-----------|----|-----------|---|----------|
| rs635346   | LOC338667 | 11 | 125323615 | 7 | 0.023124 |
| rs635346   | LOC338667 | 11 | 125323615 | 4 | 0.646    |
| rs4937076  | LOC338667 | 11 | 125331912 | 7 | 1.015142 |
| rs4937076  | LOC338667 | 11 | 125331912 | 4 | 1.385578 |
| rs4937076  | LOC338667 | 11 | 125331912 | 3 | 1.900996 |
| rs3039     | CDON      | 11 | 125331995 | 6 | 1.59783  |
| rs684535   | CDON      | 11 | 125336180 | 1 | 6.888701 |
| rs684535   | CDON      | 11 | 125336180 | 3 | 4.09839  |
| rs684535   | CDON      | 11 | 125336180 | 4 | 5.927728 |
| rs684535   | CDON      | 11 | 125336180 | 7 | 8.997784 |
| rs2276061  | CDON      | 11 | 125336911 | 6 | 2.212802 |
| rs12274923 | CDON      | 11 | 125376925 | 1 | 5.354731 |
| rs12274923 | CDON      | 11 | 125376925 | 7 | 0.14769  |
| rs12274923 | CDON      | 11 | 125376925 | 5 | 3.994003 |
| rs12274923 | CDON      | 11 | 125376925 | 3 | 1.091234 |
| rs3740909  | CDON      | 11 | 125394736 | 2 | 3.809934 |
| rs3740909  | CDON      | 11 | 125394736 | 3 | 1.043764 |
| rs3740909  | CDON      | 11 | 125394736 | 7 | 2.109854 |
| rs1786702  | FOXRED1   | 11 | 125644310 | 5 | 5.55351  |
| rs3802814  | TIRAP     | 11 | 125667817 | 7 | 0.300532 |
| rs611953   | TIRAP     | 11 | 125668901 | 2 | 4.937728 |
| rs611953   | TIRAP     | 11 | 125668901 | 5 | 0.490908 |
| rs611953   | TIRAP     | 11 | 125668901 | 8 | 5.894424 |
| rs12269776 | KIRREL3   | 11 | 125896507 | 5 | 0.596537 |
| rs675759   | KCNJ1     | 11 | 128213185 | 3 | 1.230348 |
| rs675759   | KCNJ1     | 11 | 128213185 | 2 | 1.416695 |
| rs675388   | KCNJ1     | 11 | 128213219 | 3 | 0.51897  |
| rs673992   | KCNJ1     | 11 | 128213554 | 3 | 0.237977 |
| rs673992   | KCNJ1     | 11 | 128213554 | 2 | 0.792257 |
| rs1231254  | KCNJ1     | 11 | 128214157 | 3 | 0.770798 |
| rs12362800 | C11orf45  | 11 | 128277347 | 4 | 0.190973 |
| rs12362800 | C11orf45  | 11 | 128277347 | 2 | 3.330721 |
| rs6590357  | KCNJ5     | 11 | 128286549 | 2 | 0.450575 |
| rs6590357  | KCNJ5     | 11 | 128286549 | 3 | 0.429116 |
| rs6590357  | KCNJ5     | 11 | 128286549 | 1 | 0.884292 |
| rs6590357  | KCNJ5     | 11 | 128286549 | 6 | 0.606751 |
| rs2846675  | KCNJ5     | 11 | 128292246 | 3 | 0.507937 |
| rs2846675  | KCNJ5     | 11 | 128292246 | 1 | 1.989927 |
| rs2846675  | KCNJ5     | 11 | 128292246 | 6 | 1.035092 |
| rs7925056  | KCNJ5     | 11 | 128292764 | 1 | 0.021759 |
| rs7925056  | KCNJ5     | 11 | 128292764 | 6 | 0.24991  |
| rs10791011 | BARX2     | 11 | 128826276 | 1 | 4.388622 |
| rs11221912 | PRDM10    | 11 | 129336006 | 7 | 5.901921 |
| rs11221912 | PRDM10    | 11 | 129336006 | 4 | 5.103775 |
| rs704625   | ST14      | 11 | 129585247 | 2 | 7.718427 |
| rs704625   | ST14      | 11 | 129585247 | 1 | 0.429764 |
| rs704625   | ST14      | 11 | 129585247 | 4 | 0.090112 |

|                |           |    |           |   |          |
|----------------|-----------|----|-----------|---|----------|
| rs704625       | ST14      | 11 | 129585247 | 6 | 0.282427 |
| rs5852         | ST14      | 11 | 129585275 | 4 | 1.119467 |
| rs5852         | ST14      | 11 | 129585275 | 6 | 6.388192 |
| rs5852         | ST14      | 11 | 129585275 | 1 | 0.128382 |
| rs5852         | ST14      | 11 | 129585275 | 2 | 0.312621 |
| rs11222085     | ADAMTS8   | 11 | 129780959 | 6 | 0.864059 |
| rs11222085     | ADAMTS8   | 11 | 129780959 | 8 | 0.232599 |
| rs2131535      | ADAMTS8   | 11 | 129786698 | 1 | 0.51787  |
| rs2291348      | ADAMTS8   | 11 | 129794327 | 5 | 0.184794 |
| rs731446       | ADAMTS15  | 11 | 129844522 | 5 | 0.284665 |
| rs7933829      | C11orf44  | 11 | 130048092 | 5 | 0.049078 |
| rs1050071      | SNX19     | 11 | 130252441 | 2 | 0.509726 |
| rs1050071      | SNX19     | 11 | 130252441 | 4 | 0.82116  |
| rs1050071      | SNX19     | 11 | 130252441 | 5 | 0.772556 |
| rs1050071      | SNX19     | 11 | 130252441 | 3 | 8.772753 |
| rs4373936      | SNX19     | 11 | 130281823 | 5 | 0.005693 |
| rs4373936      | SNX19     | 11 | 130281823 | 1 | 5.197229 |
| rs4373936      | SNX19     | 11 | 130281823 | 4 | 1.073553 |
| SNP11-13028960 | SNX19     | 11 | 130289606 | 2 | 3.845348 |
| SNP11-13028960 | SNX19     | 11 | 130289606 | 1 | 0.349763 |
| SNP11-13028960 | SNX19     | 11 | 130289606 | 3 | 0.281713 |
| rs2658859      | C11orf39  | 11 | 131036433 | 1 | 2.649708 |
| rs10894557     | OPCML     | 11 | 131794070 | 4 | 1.131075 |
| rs3360         | OPCML     | 11 | 131794971 | 3 | 0.545625 |
| rs3360         | OPCML     | 11 | 131794971 | 5 | 0.75563  |
| rs3360         | OPCML     | 11 | 131794971 | 8 | 0.322547 |
| rs3360         | OPCML     | 11 | 131794971 | 7 | 0.4227   |
| rs2250123      | SPATA19   | 11 | 133216006 | 3 | 0.794441 |
| rs329652       | LOC283174 | 11 | 133274909 | 4 | 0.232097 |
| rs329652       | LOC283174 | 11 | 133274909 | 6 | 0.307467 |
| rs329652       | LOC283174 | 11 | 133274909 | 1 | 4.285701 |
| rs329652       | LOC283174 | 11 | 133274909 | 7 | 1.204554 |
| rs3824992      | IGSF9B    | 11 | 133291800 | 3 | 0.8009   |
| rs3802923      | IGSF9B    | 11 | 133292034 | 3 | 0.717556 |
| rs3802923      | IGSF9B    | 11 | 133292034 | 1 | 1.541748 |
| rs3802920      | IGSF9B    | 11 | 133292211 | 4 | 1.66728  |
| rs3802920      | IGSF9B    | 11 | 133292211 | 1 | 3.675181 |
| rs3802920      | IGSF9B    | 11 | 133292211 | 7 | 1.040499 |
| rs12800905     | IGSF9B    | 11 | 133294202 | 3 | 1.297864 |
| rs12800905     | IGSF9B    | 11 | 133294202 | 2 | 1.477721 |
| rs12800905     | IGSF9B    | 11 | 133294202 | 1 | 1.904923 |
| rs12800905     | IGSF9B    | 11 | 133294202 | 5 | 0.482745 |
| rs12800905     | IGSF9B    | 11 | 133294202 | 4 | 1.039002 |
| rs12800905     | IGSF9B    | 11 | 133294202 | 6 | 4.724415 |
| rs12800905     | IGSF9B    | 11 | 133294202 | 7 | 2.562649 |
| rs329637       | IGSF9B    | 11 | 133310795 | 4 | 2.129979 |
| rs329637       | IGSF9B    | 11 | 133310795 | 1 | 4.23571  |

|              |           |    |           |   |          |
|--------------|-----------|----|-----------|---|----------|
| rs329637     | IGSF9B    | 11 | 133310795 | 3 | 0.354404 |
| rs329637     | IGSF9B    | 11 | 133310795 | 5 | 5.773912 |
| rs329637     | IGSF9B    | 11 | 133310795 | 7 | 0.89921  |
| rs329637     | IGSF9B    | 11 | 133310795 | 6 | 6.150681 |
| rs595986     | IGSF9B    | 11 | 133319401 | 5 | 0.156848 |
| rs595986     | IGSF9B    | 11 | 133319401 | 6 | 0.772881 |
| rs595986     | IGSF9B    | 11 | 133319401 | 4 | 0.694471 |
| rs641024     | JAM3      | 11 | 133526058 | 2 | 4.421217 |
| rs11607699   | NCAPD3    | 11 | 133599098 | 8 | 5.976175 |
| rs11607699   | NCAPD3    | 11 | 133599098 | 6 | 0.525522 |
| rs11607699   | NCAPD3    | 11 | 133599098 | 3 | 0.193496 |
| rs12180      | VPS26B    | 11 | 133621335 | 6 | 0.025935 |
| rs12180      | VPS26B    | 11 | 133621335 | 2 | 4.784023 |
| rs12180      | VPS26B    | 11 | 133621335 | 3 | 0.328975 |
| rs12180      | VPS26B    | 11 | 133621335 | 1 | 1.018421 |
| rs2443558    | LOC729860 | 11 | 133651235 | 1 | 2.208161 |
| rs2443558    | LOC729860 | 11 | 133651235 | 3 | 0.723426 |
| rs2443558    | LOC729860 | 11 | 133651235 | 5 | 1.305206 |
| rs2443558    | LOC729860 | 11 | 133651235 | 7 | 0.973637 |
| rs3824995    | GLB1L3    | 11 | 133663955 | 4 | 1.606387 |
| rs3824995    | GLB1L3    | 11 | 133663955 | 5 | 0.865608 |
| rs3824995    | GLB1L3    | 11 | 133663955 | 3 | 2.456111 |
| rs481252     | GLB1L3    | 11 | 133693752 | 8 | 1.005345 |
| rs481252     | GLB1L3    | 11 | 133693752 | 1 | 1.80128  |
| rs7124693    | LOC89944  | 11 | 133707246 | 3 | 0.617617 |
| rs893952     | B3GAT1    | 11 | 133754559 | 2 | 2.524971 |
| rs893952     | B3GAT1    | 11 | 133754559 | 8 | 2.271825 |
| rs893952     | B3GAT1    | 11 | 133754559 | 1 | 0.645057 |
| rs893952     | B3GAT1    | 11 | 133754559 | 4 | 1.592697 |
| SNP12-118463 | IQSEC3    | 12 | 118463    | 5 | 1.445104 |
| SNP12-118463 | IQSEC3    | 12 | 118463    | 3 | 0.768852 |
| SNP12-118463 | IQSEC3    | 12 | 118463    | 1 | 1.123369 |
| rs542736     | SLC6A12   | 12 | 169976    | 1 | 0.609967 |
| rs542736     | SLC6A12   | 12 | 169976    | 5 | 2.106472 |
| rs542736     | SLC6A12   | 12 | 169976    | 3 | 0.058589 |
| rs2075228    | SLC6A12   | 12 | 170148    | 3 | 0.416368 |
| rs2075228    | SLC6A12   | 12 | 170148    | 1 | 2.040711 |
| rs2075228    | SLC6A12   | 12 | 170148    | 5 | 0.284221 |
| rs577294     | SLC6A13   | 12 | 203454    | 7 | 1.155908 |
| rs2302258    | CCDC77    | 12 | 421721    | 6 | 3.939224 |
| rs2075033    | B4GALNT3  | 12 | 514598    | 6 | 0.240838 |
| rs2075033    | B4GALNT3  | 12 | 514598    | 7 | 0.717043 |
| rs11063529   | B4GALNT3  | 12 | 527665    | 7 | 0.428725 |
| rs11063529   | B4GALNT3  | 12 | 527665    | 2 | 0.003248 |
| rs11063529   | B4GALNT3  | 12 | 527665    | 1 | 0.182549 |
| rs7298766    | B4GALNT3  | 12 | 531917    | 6 | 0.080462 |
| rs7298766    | B4GALNT3  | 12 | 531917    | 1 | 0.788392 |

|               |          |    |         |   |          |
|---------------|----------|----|---------|---|----------|
| rs7298766     | B4GALNT3 | 12 | 531917  | 7 | 0.043088 |
| rs2245918     | NINJ2    | 12 | 543776  | 2 | 1.435301 |
| rs2245918     | NINJ2    | 12 | 543776  | 3 | 1.639291 |
| rs2245910     | NINJ2    | 12 | 543965  | 3 | 0.103356 |
| rs2245910     | NINJ2    | 12 | 543965  | 2 | 0.234921 |
| rs2245906     | NINJ2    | 12 | 544049  | 3 | 1.313997 |
| rs34578646    | NINJ2    | 12 | 545600  | 3 | 0.475171 |
| rs1064125     | ERC1     | 12 | 1471239 | 6 | 2.244378 |
| rs1064125     | ERC1     | 12 | 1471239 | 1 | 5.834318 |
| rs35466364    | FBXL14   | 12 | 1573173 | 1 | 5.230947 |
| rs3803163     | WNT5B    | 12 | 1626221 | 3 | 0.220892 |
| rs3803163     | WNT5B    | 12 | 1626221 | 1 | 4.447506 |
| rs2286380     | ADIPOR2  | 12 | 1767545 | 7 | 5.708216 |
| rs2286380     | ADIPOR2  | 12 | 1767545 | 2 | 5.965259 |
| rs1044825     | CACNA2D4 | 12 | 1771746 | 1 | 0.728391 |
| rs1044825     | CACNA2D4 | 12 | 1771746 | 6 | 1.591489 |
| rs1044825     | CACNA2D4 | 12 | 1771746 | 4 | 5.153153 |
| rs1044825     | CACNA2D4 | 12 | 1771746 | 5 | 0.372214 |
| rs2286379     | CACNA2D4 | 12 | 1772425 | 2 | 1.326169 |
| rs2286379     | CACNA2D4 | 12 | 1772425 | 1 | 1.212531 |
| rs2286379     | CACNA2D4 | 12 | 1772425 | 5 | 0.38629  |
| rs2286379     | CACNA2D4 | 12 | 1772425 | 6 | 3.799402 |
| rs2286379     | CACNA2D4 | 12 | 1772425 | 4 | 0.65851  |
| rs2058111     | CACNA2D4 | 12 | 1773027 | 6 | 0.914325 |
| rs2058111     | CACNA2D4 | 12 | 1773027 | 5 | 1.161912 |
| rs2058111     | CACNA2D4 | 12 | 1773027 | 1 | 0.070178 |
| rs34730825    | DPC1B    | 12 | 1934863 | 1 | 0.294664 |
| rs1544514     | CACNA1C  | 12 | 2428447 | 8 | 0.778603 |
| rs11062319    | CACNA1C  | 12 | 2670910 | 3 | 0.639819 |
| rs2907608     | C12orf32 | 12 | 2867658 | 7 | 3.697833 |
| rs2907608     | C12orf32 | 12 | 2867658 | 6 | 0.437609 |
| rs634076      | TSPAN9   | 12 | 3262819 | 1 | 0.697486 |
| rs634076      | TSPAN9   | 12 | 3262819 | 2 | 0.154741 |
| rs634076      | TSPAN9   | 12 | 3262819 | 3 | 0.252037 |
| rs634076      | TSPAN9   | 12 | 3262819 | 4 | 1.156942 |
| rs887305      | EFCAB4B  | 12 | 3627514 | 5 | 3.360775 |
| rs887305      | EFCAB4B  | 12 | 3627514 | 7 | 0.264753 |
| rs887305      | EFCAB4B  | 12 | 3627514 | 2 | 2.548722 |
| rs887305      | EFCAB4B  | 12 | 3627514 | 6 | 2.25663  |
| rs877554      | EFCAB4B  | 12 | 3627685 | 6 | 0.115642 |
| rs877554      | EFCAB4B  | 12 | 3627685 | 2 | 3.418389 |
| rs877554      | EFCAB4B  | 12 | 3627685 | 7 | 3.252891 |
| rs877554      | EFCAB4B  | 12 | 3627685 | 5 | 0.372553 |
| rs877554      | EFCAB4B  | 12 | 3627685 | 3 | 0.090932 |
| rs887304      | EFCAB4B  | 12 | 3627809 | 1 | 6.04109  |
| rs887304      | EFCAB4B  | 12 | 3627809 | 3 | 1.874088 |
| SNP12-3652908 | EFCAB4B  | 12 | 3652908 | 7 | 0.254433 |

|               |           |    |         |   |          |
|---------------|-----------|----|---------|---|----------|
| rs3803135     | EFCAB4B   | 12 | 3658449 | 7 | 0.065762 |
| rs242017      | EFCAB4B   | 12 | 3658483 | 1 | 4.763704 |
| rs10491974    | EFCAB4B   | 12 | 3712450 | 6 | 1.458271 |
| rs10491974    | EFCAB4B   | 12 | 3712450 | 4 | 1.059806 |
| rs10491974    | EFCAB4B   | 12 | 3712450 | 5 | 6.965749 |
| rs700481      | PARP11    | 12 | 3788736 | 7 | 0.019044 |
| rs700481      | PARP11    | 12 | 3788736 | 6 | 1.175558 |
| rs12823996    | PARP11    | 12 | 3852736 | 7 | 1.159381 |
| rs7315461     | LOC399988 | 12 | 4077029 | 4 | 0.304484 |
| rs7309402     | C12orf5   | 12 | 4329293 | 1 | 5.298956 |
| rs11063112    | FGF23     | 12 | 4348341 | 3 | 0.681752 |
| rs11063112    | FGF23     | 12 | 4348341 | 7 | 0.362323 |
| rs2241279     | FGF6      | 12 | 4423644 | 4 | 0.878738 |
| rs2241279     | FGF6      | 12 | 4423644 | 5 | 0.922324 |
| SNP12-4572472 | DYRK4     | 12 | 4572472 | 7 | 0.562561 |
| rs3741925     | DYRK4     | 12 | 4575578 | 3 | 0.063676 |
| rs3741925     | DYRK4     | 12 | 4575578 | 1 | 0.154561 |
| rs3741925     | DYRK4     | 12 | 4575578 | 4 | 0.235283 |
| rs3741925     | DYRK4     | 12 | 4575578 | 2 | 0.953853 |
| SNP12-4606830 | AKAP3     | 12 | 4606830 | 4 | 1.712098 |
| rs34076756    | NDUFA9    | 12 | 4661712 | 5 | 0.051652 |
| rs2286578     | GALNT8    | 12 | 4706143 | 4 | 0.505816 |
| rs2286578     | GALNT8    | 12 | 4706143 | 7 | 5.061582 |
| rs2286581     | GALNT8    | 12 | 4752027 | 1 | 2.194874 |
| rs2286581     | GALNT8    | 12 | 4752027 | 7 | 0.107098 |
| rs2286581     | GALNT8    | 12 | 4752027 | 4 | 0.823402 |
| rs2286582     | GALNT8    | 12 | 4752036 | 1 | 2.673664 |
| rs2286582     | GALNT8    | 12 | 4752036 | 5 | 0.25568  |
| rs758534      | KCNA6     | 12 | 4789528 | 5 | 2.566066 |
| rs2239503     | KCNA6     | 12 | 4791489 | 7 | 1.75501  |
| rs3741930     | KCNA5     | 12 | 5023408 | 5 | 2.558087 |
| rs6332        | NTF3      | 12 | 5473893 | 1 | 0.251083 |
| rs6332        | NTF3      | 12 | 5473893 | 6 | 0.948492 |
| rs6332        | NTF3      | 12 | 5473893 | 2 | 1.20443  |
| rs6332        | NTF3      | 12 | 5473893 | 7 | 1.536839 |
| rs6332        | NTF3      | 12 | 5473893 | 3 | 0.505777 |
| rs10849277    | NTF3      | 12 | 5474196 | 6 | 1.038322 |
| rs10849277    | NTF3      | 12 | 5474196 | 8 | 0.84693  |
| rs10849277    | NTF3      | 12 | 5474196 | 7 | 1.026475 |
| rs10849277    | NTF3      | 12 | 5474196 | 3 | 1.020698 |
| SNP12-5948685 | VWF       | 12 | 5948685 | 7 | 1.021839 |
| rs216902      | VWF       | 12 | 5975648 | 3 | 0.221872 |
| rs7312411     | VWF       | 12 | 6037457 | 3 | 2.286406 |
| rs7312411     | VWF       | 12 | 6037457 | 1 | 3.41441  |
| SNP12-6053089 | VWF       | 12 | 6053089 | 1 | 0.757756 |
| rs740842      | PLEKHG6   | 12 | 6291756 | 1 | 3.231939 |
| rs740842      | PLEKHG6   | 12 | 6291756 | 7 | 4.727143 |

|            |                      |    |         |   |          |
|------------|----------------------|----|---------|---|----------|
| rs740842   | PLEKHG6              | 12 | 6291756 | 8 | 4.814869 |
| rs740842   | PLEKHG6              | 12 | 6291756 | 4 | 10.07127 |
| rs740842   | PLEKHG6              | 12 | 6291756 | 3 | 0.118077 |
| rs4149584  | TNFRSF1A             | 12 | 6312904 | 8 | 5.716362 |
| rs25680    | CD27                 | 12 | 6424889 | 6 | 0.067572 |
| rs25680    | CD27                 | 12 | 6424889 | 5 | 1.60009  |
| rs1059501  | CD27                 | 12 | 6430834 | 6 | 1.426018 |
| rs1059501  | CD27                 | 12 | 6430834 | 2 | 2.1601   |
| rs1059501  | CD27                 | 12 | 6430834 | 4 | 0.442171 |
| rs1045546  | TAPBPL               | 12 | 6438168 | 2 | 3.840463 |
| rs1045546  | TAPBPL               | 12 | 6438168 | 6 | 0.044582 |
| rs1045546  | TAPBPL               | 12 | 6438168 | 3 | 1.066845 |
| rs2534712  | VAMP1                | 12 | 6442810 | 6 | 1.835856 |
| rs2534712  | VAMP1                | 12 | 6442810 | 2 | 4.864945 |
| rs2534713  | VAMP1                | 12 | 6442848 | 8 | 5.113341 |
| rs2534713  | VAMP1                | 12 | 6442848 | 4 | 5.253699 |
| rs2534713  | VAMP1                | 12 | 6442848 | 3 | 0.06631  |
| rs2534715  | VAMP1                | 12 | 6443407 | 3 | 0.086419 |
| rs2534715  | VAMP1                | 12 | 6443407 | 4 | 0.601046 |
| rs2534717  | VAMP1                | 12 | 6444010 | 4 | 0.255721 |
| rs2534717  | VAMP1                | 12 | 6444010 | 8 | 0.499098 |
| rs2534717  | VAMP1                | 12 | 6444010 | 3 | 0.710191 |
| rs1034969  | VAMP1                | 12 | 6444117 | 8 | 0.317093 |
| rs1034969  | VAMP1                | 12 | 6444117 | 4 | 0.662073 |
| rs1034969  | VAMP1                | 12 | 6444117 | 3 | 0.892645 |
| rs2072375  | VAMP1                | 12 | 6445305 | 4 | 0.707082 |
| rs2072375  | VAMP1                | 12 | 6445305 | 3 | 0.88051  |
| rs2072376  | VAMP1                | 12 | 6450073 | 4 | 0.649198 |
| rs2072376  | VAMP1                | 12 | 6450073 | 3 | 1.216301 |
| rs2072376  | VAMP1                | 12 | 6450073 | 6 | 0.34289  |
| rs3180589  | MRPL51               | 12 | 6472683 | 2 | 4.716038 |
| rs3180589  | MRPL51               | 12 | 6472683 | 6 | 0.261209 |
| rs7976498  | MRPL51               | 12 | 6472694 | 2 | 3.826087 |
| rs7976498  | MRPL51               | 12 | 6472694 | 6 | 1.323366 |
| rs714774   | NCAPD2               | 12 | 6489545 | 4 | 0.16266  |
| rs714774   | NCAPD2               | 12 | 6489545 | 8 | 0.069202 |
| rs714774   | NCAPD2               | 12 | 6489545 | 3 | 0.194393 |
| rs740850   | NCAPD2               | 12 | 6508377 | 6 | 0.920213 |
| rs1136666  | GAPDH                | 12 | 6514252 | 6 | 5.078034 |
| rs1136666  | GAPDH                | 12 | 6514252 | 8 | 6.799929 |
| rs1047792  | HOM- <i>TES</i> -103 | 12 | 6519360 | 8 | 0.351347 |
| GA028649   | CHD4                 | 12 | 6577787 | 2 | 6.035218 |
| rs11539542 | CHD4                 | 12 | 6579320 | 6 | 4.3576   |
| rs11539542 | CHD4                 | 12 | 6579320 | 2 | 4.170676 |
| rs1639122  | CHD4                 | 12 | 6581408 | 4 | 1.175765 |
| rs1639122  | CHD4                 | 12 | 6581408 | 3 | 1.239565 |
| rs1639122  | CHD4                 | 12 | 6581408 | 6 | 0.250191 |

|               |           |    |         |   |          |
|---------------|-----------|----|---------|---|----------|
| rs7964510     | ZNF384    | 12 | 6657883 | 7 | 0.580504 |
| rs870849      | LAG3      | 12 | 6757281 | 8 | 0.421353 |
| rs870849      | LAG3      | 12 | 6757281 | 1 | 0.76886  |
| rs870849      | LAG3      | 12 | 6757281 | 4 | 0.478265 |
| rs870849      | LAG3      | 12 | 6757281 | 3 | 0.412858 |
| rs870849      | LAG3      | 12 | 6757281 | 2 | 0.567392 |
| rs11612427    | GPR162    | 12 | 6806238 | 4 | 0.376139 |
| rs11612427    | GPR162    | 12 | 6806238 | 3 | 0.776226 |
| rs11612427    | GPR162    | 12 | 6806238 | 5 | 0.500206 |
| rs11612427    | GPR162    | 12 | 6806238 | 7 | 0.86669  |
| rs10744716    | LEPREL2   | 12 | 6810111 | 2 | 1.679438 |
| rs10744716    | LEPREL2   | 12 | 6810111 | 3 | 0.530777 |
| rs10744716    | LEPREL2   | 12 | 6810111 | 6 | 0.6916   |
| SNP12-6817457 | LEPREL2   | 12 | 6817457 | 8 | 5.950159 |
| rs1129649     | LEPREL2   | 12 | 6818729 | 3 | 0.292648 |
| rs1129649     | LEPREL2   | 12 | 6818729 | 1 | 0.509279 |
| rs1984564     | MBOAT5    | 12 | 6960454 | 6 | 1.042572 |
| rs1984564     | MBOAT5    | 12 | 6960454 | 7 | 4.739348 |
| rs12146727    | C1S       | 12 | 7040597 | 8 | 3.182184 |
| rs12146727    | C1S       | 12 | 7040597 | 6 | 0.189641 |
| rs7965055     | C1S       | 12 | 7041881 | 2 | 3.051282 |
| SNP12-7172584 | RBP5      | 12 | 7172584 | 4 | 0.335849 |
| rs7306824     | CD163L1   | 12 | 7419738 | 7 | 0.580015 |
| rs10845159    | CD163L1   | 12 | 7477238 | 1 | 0.114159 |
| rs10772331    | LOC727815 | 12 | 7483406 | 1 | 4.267474 |
| rs10772331    | LOC727815 | 12 | 7483406 | 5 | 4.86262  |
| rs4883263     | CD163     | 12 | 7540751 | 5 | 1.538217 |
| rs4294629     | NANOG     | 12 | 7836826 | 5 | 0.581629 |
| rs35297839    | FOXJ2     | 12 | 8077120 | 4 | 0.585274 |
| rs7842        | C3AR1     | 12 | 8102454 | 7 | 0.500603 |
| rs7842        | C3AR1     | 12 | 8102454 | 2 | 3.585209 |
| rs7842        | C3AR1     | 12 | 8102454 | 8 | 2.851069 |
| rs7842        | C3AR1     | 12 | 8102454 | 5 | 0.280036 |
| rs7842        | C3AR1     | 12 | 8102454 | 6 | 1.883533 |
| rs1062836     | NECAP1    | 12 | 8140317 | 5 | 0.051263 |
| rs1062836     | NECAP1    | 12 | 8140317 | 6 | 3.485997 |
| rs2024301     | CLEC4A    | 12 | 8169448 | 6 | 2.958223 |
| rs2024301     | CLEC4A    | 12 | 8169448 | 7 | 0.788999 |
| rs2024301     | CLEC4A    | 12 | 8169448 | 5 | 0.064239 |
| rs10841845    | CLEC4E    | 12 | 8577700 | 7 | 0.354849 |
| rs10841845    | CLEC4E    | 12 | 8577700 | 3 | 1.132438 |
| rs14541       | MFAP5     | 12 | 8691833 | 8 | 1.727919 |
| rs1860967     | A2ML1     | 12 | 8905022 | 1 | 3.652746 |
| rs1860967     | A2ML1     | 12 | 8905022 | 8 | 4.275124 |
| rs1860967     | A2ML1     | 12 | 8905022 | 3 | 0.145288 |
| SNP12-8907723 | A2ML1     | 12 | 8907723 | 2 | 4.778116 |
| rs1476910     | A2ML1     | 12 | 8912179 | 6 | 5.696188 |

|               |         |    |          |   |          |
|---------------|---------|----|----------|---|----------|
| rs1476910     | A2ML1   | 12 | 8912179  | 7 | 0.895389 |
| rs1805723     | KLRG1   | 12 | 9033564  | 5 | 0.064291 |
| rs1805716     | KLRG1   | 12 | 9054163  | 7 | 1.028332 |
| rs1805716     | KLRG1   | 12 | 9054163  | 8 | 1.609755 |
| rs1805716     | KLRG1   | 12 | 9054163  | 5 | 0.547459 |
| rs12826054    | KLRG1   | 12 | 9054570  | 7 | 0.427074 |
| rs12826054    | KLRG1   | 12 | 9054570  | 5 | 0.777234 |
| rs226380      | A2M     | 12 | 9159740  | 5 | 0.898197 |
| rs226380      | A2M     | 12 | 9159740  | 7 | 0.308284 |
| rs226380      | A2M     | 12 | 9159740  | 1 | 2.480256 |
| rs226380      | A2M     | 12 | 9159740  | 8 | 2.850664 |
| rs10842971    | PZP     | 12 | 9194563  | 1 | 0.549551 |
| rs10771357    | PZP     | 12 | 9196740  | 8 | 0.779075 |
| rs10771357    | PZP     | 12 | 9196740  | 7 | 2.354546 |
| rs10771357    | PZP     | 12 | 9196740  | 1 | 0.848407 |
| rs10771357    | PZP     | 12 | 9196740  | 5 | 0.721788 |
| SNP12-9204218 | PZP     | 12 | 9204218  | 1 | 1.958019 |
| rs10771407    | PZP     | 12 | 9236540  | 1 | 2.254682 |
| SNP12-9238059 | PZP     | 12 | 9238059  | 3 | 0.534141 |
| SNP12-9238059 | PZP     | 12 | 9238059  | 1 | 2.485678 |
| SNP12-9238059 | PZP     | 12 | 9238059  | 5 | 0.658088 |
| rs1135816     | KLRB1   | 12 | 9641936  | 5 | 1.2634   |
| rs1135816     | KLRB1   | 12 | 9641936  | 1 | 2.285788 |
| rs1135816     | KLRB1   | 12 | 9641936  | 4 | 1.312315 |
| SNP12-9724791 | CLEC2D  | 12 | 9724791  | 6 | 1.063024 |
| SNP12-9724791 | CLEC2D  | 12 | 9724791  | 7 | 0.514424 |
| SNP12-9724791 | CLEC2D  | 12 | 9724791  | 4 | 0.549483 |
| SNP12-9724791 | CLEC2D  | 12 | 9724791  | 5 | 0.014129 |
| rs11052877    | CD69    | 12 | 9796957  | 1 | 1.565542 |
| rs11052877    | CD69    | 12 | 9796957  | 5 | 0.804809 |
| rs917911      | CD69    | 12 | 9797118  | 1 | 0.061155 |
| rs917911      | CD69    | 12 | 9797118  | 5 | 0.555194 |
| rs2232548     | KLRF1   | 12 | 9877182  | 5 | 2.646249 |
| rs7980232     | KLRF1   | 12 | 9888542  | 5 | 6.244244 |
| rs479499      | CLEC12A | 12 | 10028824 | 2 | 3.733127 |
| rs479499      | CLEC12A | 12 | 10028824 | 4 | 4.705637 |
| rs494312      | CLEC12B | 12 | 10059978 | 8 | 3.631846 |
| rs494312      | CLEC12B | 12 | 10059978 | 4 | 1.761287 |
| rs7315231     | CLEC9A  | 12 | 10098192 | 5 | 1.057396 |
| rs7315231     | CLEC9A  | 12 | 10098192 | 1 | 1.145275 |
| rs7959451     | CLEC7A  | 12 | 10162322 | 4 | 1.147128 |
| rs7959451     | CLEC7A  | 12 | 10162322 | 5 | 0.928931 |
| rs1050289     | OLR1    | 12 | 10202433 | 1 | 4.184905 |
| rs1050286     | OLR1    | 12 | 10202830 | 1 | 3.261717 |
| rs17808009    | OLR1    | 12 | 10203196 | 3 | 0.581254 |
| rs10505755    | OLR1    | 12 | 10203229 | 5 | 0.12842  |
| rs10505755    | OLR1    | 12 | 10203229 | 7 | 1.267848 |



|            |          |    |          |   |          |
|------------|----------|----|----------|---|----------|
| rs10505755 | OLR1     | 12 | 10203229 | 1 | 1.134424 |
| rs10505755 | OLR1     | 12 | 10203229 | 3 | 1.991835 |
| rs4523782  | C12orf59 | 12 | 10234360 | 5 | 1.025557 |
| rs1049172  | KLRK1    | 12 | 10417007 | 1 | 5.949605 |
| rs1049172  | KLRK1    | 12 | 10417007 | 5 | 0.089589 |
| rs2255336  | KLRK1    | 12 | 10423593 | 4 | 4.917839 |
| rs2255336  | KLRK1    | 12 | 10423593 | 5 | 0.876607 |
| rs1841957  | KLRC4    | 12 | 10453292 | 1 | 3.988187 |
| rs2244387  | KLRA1    | 12 | 10637652 | 1 | 4.023879 |
| rs2168749  | KLRA1    | 12 | 10639581 | 1 | 0.862019 |
| rs2168749  | KLRA1    | 12 | 10639581 | 3 | 1.162329 |
| rs2682484  | KLRA1    | 12 | 10639670 | 1 | 5.255132 |
| rs2682484  | KLRA1    | 12 | 10639670 | 5 | 0.981892 |
| rs1054396  | FLJ10292 | 12 | 10648122 | 3 | 0.35552  |
| rs1054396  | FLJ10292 | 12 | 10648122 | 1 | 0.069516 |
| rs1054396  | FLJ10292 | 12 | 10648122 | 5 | 0.098508 |
| rs1548803  | TAS2R8   | 12 | 10850298 | 1 | 0.556135 |
| rs3741845  | TAS2R9   | 12 | 10853382 | 5 | 0.98207  |
| rs3741845  | TAS2R9   | 12 | 10853382 | 2 | 1.174726 |
| rs3741845  | TAS2R9   | 12 | 10853382 | 1 | 0.350767 |
| rs1047699  | PRR4     | 12 | 10890975 | 1 | 0.169857 |
| rs1047699  | PRR4     | 12 | 10890975 | 2 | 0.441417 |
| rs1015442  | TAS2R13  | 12 | 10951962 | 5 | 0.858227 |
| rs1015442  | TAS2R13  | 12 | 10951962 | 7 | 0.804346 |
| rs1015442  | TAS2R13  | 12 | 10951962 | 1 | 0.430766 |
| rs1015443  | TAS2R13  | 12 | 10952389 | 1 | 0.358381 |
| rs1015443  | TAS2R13  | 12 | 10952389 | 2 | 2.917399 |
| rs1015443  | TAS2R13  | 12 | 10952389 | 6 | 0.188231 |
| rs1015443  | TAS2R13  | 12 | 10952389 | 5 | 0.189559 |
| rs1015443  | TAS2R13  | 12 | 10952389 | 7 | 1.03339  |
| rs10492101 | PRH2     | 12 | 10977431 | 5 | 0.442466 |
| rs10492102 | PRH2     | 12 | 10977650 | 5 | 4.586023 |
| rs10492102 | PRH2     | 12 | 10977650 | 7 | 3.548877 |
| rs10772397 | TAS2R50  | 12 | 11029950 | 5 | 1.383329 |
| rs10772397 | TAS2R50  | 12 | 11029950 | 1 | 1.111936 |
| rs10772397 | TAS2R50  | 12 | 11029950 | 7 | 1.282216 |
| rs10772397 | TAS2R50  | 12 | 11029950 | 2 | 0.362161 |
| rs10845279 | TAS2R49  | 12 | 11040978 | 5 | 0.906716 |
| rs10845279 | TAS2R49  | 12 | 11040978 | 1 | 3.907149 |
| rs10845279 | TAS2R49  | 12 | 11040978 | 4 | 1.354362 |
| rs10845279 | TAS2R49  | 12 | 11040978 | 3 | 0.887756 |
| rs10845280 | TAS2R49  | 12 | 11040987 | 1 | 3.944212 |
| rs10845280 | TAS2R49  | 12 | 11040987 | 3 | 0.268545 |
| rs10845280 | TAS2R49  | 12 | 11040987 | 5 | 0.840393 |
| rs10845280 | TAS2R49  | 12 | 11040987 | 4 | 0.413762 |
| rs12226919 | TAS2R49  | 12 | 11041300 | 4 | 0.478275 |
| rs12226919 | TAS2R49  | 12 | 11041300 | 5 | 0.14976  |

|            |           |    |          |   |          |
|------------|-----------|----|----------|---|----------|
| rs12226919 | TAS2R49   | 12 | 11041300 | 3 | 0.426542 |
| rs12226919 | TAS2R49   | 12 | 11041300 | 1 | 3.610975 |
| rs12226920 | TAS2R49   | 12 | 11041313 | 3 | 0.156548 |
| rs12226920 | TAS2R49   | 12 | 11041313 | 5 | 0.119015 |
| rs12226920 | TAS2R49   | 12 | 11041313 | 1 | 4.344348 |
| rs12318612 | TAS2R44   | 12 | 11074375 | 3 | 1.549245 |
| rs12318612 | TAS2R44   | 12 | 11074375 | 2 | 6.375581 |
| rs12318612 | TAS2R44   | 12 | 11074375 | 4 | 0.602593 |
| rs12318612 | TAS2R44   | 12 | 11074375 | 7 | 1.067498 |
| rs1451772  | TAS2R42   | 12 | 11230017 | 2 | 2.347885 |
| rs1451772  | TAS2R42   | 12 | 11230017 | 5 | 1.739586 |
| rs1669413  | TAS2R42   | 12 | 11230048 | 1 | 3.934806 |
| rs1650019  | TAS2R42   | 12 | 11230250 | 1 | 2.510404 |
| rs1863842  | PRB4      | 12 | 11351330 | 1 | 3.035991 |
| rs1863842  | PRB4      | 12 | 11351330 | 5 | 1.117019 |
| rs11611479 | ETV6      | 12 | 11883435 | 4 | 0.180972 |
| rs2287154  | BCL2L14   | 12 | 12115810 | 1 | 4.379607 |
| rs11054682 | BCL2L14   | 12 | 12138861 | 1 | 4.418007 |
| rs11054683 | BCL2L14   | 12 | 12138883 | 1 | 2.864888 |
| rs1797647  | BCL2L14   | 12 | 12143345 | 2 | 1.762181 |
| rs17375215 | MANSC1    | 12 | 12375031 | 5 | 5.110914 |
| rs3751262  | LOH12CR1  | 12 | 12509957 | 2 | 4.126451 |
| rs3751262  | LOH12CR1  | 12 | 12509957 | 5 | 1.182273 |
| rs3803098  | LOH12CR1  | 12 | 12510393 | 2 | 4.303171 |
| rs3803098  | LOH12CR1  | 12 | 12510393 | 5 | 0.263115 |
| rs4237941  | LOC644467 | 12 | 12612565 | 3 | 4.159403 |
| rs4237941  | LOC644467 | 12 | 12612565 | 5 | 4.126291 |
| rs4237941  | LOC644467 | 12 | 12612565 | 6 | 2.721052 |
| rs4237941  | LOC644467 | 12 | 12612565 | 1 | 0.891824 |
| rs1802173  | CREBL2    | 12 | 12689037 | 7 | 0.044922 |
| rs4763861  | GPR19     | 12 | 12706005 | 8 | 3.828522 |
| rs34330    | CDKN1B    | 12 | 12761962 | 7 | 4.723854 |
| rs34330    | CDKN1B    | 12 | 12761962 | 3 | 0.465409 |
| rs34330    | CDKN1B    | 12 | 12761962 | 4 | 3.517488 |
| rs34330    | CDKN1B    | 12 | 12761962 | 1 | 0.48147  |
| rs2110596  | APOLD1    | 12 | 12832097 | 5 | 0.38724  |
| rs2110596  | APOLD1    | 12 | 12832097 | 4 | 0.234523 |
| rs2110596  | APOLD1    | 12 | 12832097 | 1 | 0.721821 |
| rs1420022  | APOLD1    | 12 | 12832963 | 4 | 2.853935 |
| rs1420022  | APOLD1    | 12 | 12832963 | 3 | 0.488903 |
| rs1420022  | APOLD1    | 12 | 12832963 | 8 | 2.855671 |
| rs1420022  | APOLD1    | 12 | 12832963 | 1 | 5.25437  |
| rs1420022  | APOLD1    | 12 | 12832963 | 7 | 0.923736 |
| rs1420022  | APOLD1    | 12 | 12832963 | 6 | 0.713953 |
| rs7301360  | APOLD1    | 12 | 12833800 | 4 | 0.315404 |
| rs7301360  | APOLD1    | 12 | 12833800 | 8 | 0.84567  |
| rs7301360  | APOLD1    | 12 | 12833800 | 6 | 3.004058 |

|            |           |    |          |   |          |
|------------|-----------|----|----------|---|----------|
| rs7301360  | APOLD1    | 12 | 12833800 | 3 | 0.843534 |
| rs7301360  | APOLD1    | 12 | 12833800 | 1 | 5.287297 |
| rs1061036  | GPRC5A    | 12 | 12956971 | 4 | 0.39216  |
| rs1061036  | GPRC5A    | 12 | 12956971 | 3 | 0.638194 |
| rs1061036  | GPRC5A    | 12 | 12956971 | 8 | 1.062714 |
| rs3825272  | HTR7P     | 12 | 13046606 | 7 | 2.18224  |
| rs3825272  | HTR7P     | 12 | 13046606 | 3 | 1.018199 |
| rs3825272  | HTR7P     | 12 | 13046606 | 1 | 5.524107 |
| rs3825272  | HTR7P     | 12 | 13046606 | 4 | 5.456228 |
| rs4763924  | KIAA1467  | 12 | 13099819 | 2 | 2.792149 |
| rs3741818  | KIAA1467  | 12 | 13105804 | 2 | 6.042129 |
| rs17821405 | C12orf36  | 12 | 13417595 | 7 | 2.048014 |
| rs17821405 | C12orf36  | 12 | 13417595 | 6 | 2.936726 |
| rs17821405 | C12orf36  | 12 | 13417595 | 8 | 3.267469 |
| rs11055390 | C12orf36  | 12 | 13420903 | 1 | 2.973365 |
| rs1805502  | GRIN2B    | 12 | 13605448 | 6 | 0.83148  |
| rs1805502  | GRIN2B    | 12 | 13605448 | 5 | 0.172638 |
| rs1805502  | GRIN2B    | 12 | 13605448 | 4 | 0.744605 |
| rs1805476  | GRIN2B    | 12 | 13605630 | 2 | 0.653012 |
| rs1805476  | GRIN2B    | 12 | 13605630 | 7 | 4.611781 |
| rs1805476  | GRIN2B    | 12 | 13605630 | 4 | 0.141758 |
| rs1805476  | GRIN2B    | 12 | 13605630 | 1 | 0.394896 |
| rs1805503  | GRIN2B    | 12 | 13606417 | 1 | 3.922485 |
| rs890      | GRIN2B    | 12 | 13606575 | 8 | 1.311597 |
| rs890      | GRIN2B    | 12 | 13606575 | 5 | 0.392349 |
| rs890      | GRIN2B    | 12 | 13606575 | 1 | 1.001419 |
| rs890      | GRIN2B    | 12 | 13606575 | 7 | 0.923802 |
| rs890      | GRIN2B    | 12 | 13606575 | 2 | 1.277094 |
| rs1806191  | GRIN2B    | 12 | 13607905 | 7 | 1.305974 |
| rs1806191  | GRIN2B    | 12 | 13607905 | 1 | 1.549769 |
| rs3026160  | GRIN2B    | 12 | 13611310 | 6 | 1.571236 |
| rs1805482  | GRIN2B    | 12 | 13656041 | 3 | 0.709764 |
| rs1805482  | GRIN2B    | 12 | 13656041 | 1 | 0.8976   |
| rs2231908  | ATF7IP    | 12 | 14468948 | 4 | 0.076399 |
| rs3748289  | H2AFJ     | 12 | 14820934 | 7 | 0.143231 |
| rs3748289  | H2AFJ     | 12 | 14820934 | 4 | 1.000128 |
| rs3748289  | H2AFJ     | 12 | 14820934 | 5 | 0.630505 |
| rs2241221  | LOC440087 | 12 | 14850658 | 7 | 0.061539 |
| rs7304054  | C12orf60  | 12 | 14867330 | 7 | 0.458612 |
| rs7304054  | C12orf60  | 12 | 14867330 | 2 | 3.858356 |
| rs7304054  | C12orf60  | 12 | 14867330 | 8 | 0.458859 |
| rs3088189  | ART4      | 12 | 14884875 | 6 | 0.013133 |
| rs3088189  | ART4      | 12 | 14884875 | 3 | 0.459389 |
| rs3088189  | ART4      | 12 | 14884875 | 1 | 3.756081 |
| rs1861698  | ART4      | 12 | 14885121 | 7 | 0.480152 |
| rs1861698  | ART4      | 12 | 14885121 | 3 | 0.240593 |
| rs1861698  | ART4      | 12 | 14885121 | 1 | 5.60833  |

|                |           |    |          |   |          |
|----------------|-----------|----|----------|---|----------|
| rs1861698      | ART4      | 12 | 14885121 | 6 | 0.170427 |
| rs3748299      | PTPRO     | 12 | 15624936 | 1 | 0.436561 |
| rs11056575     | PTPRO     | 12 | 15639682 | 6 | 0.566772 |
| rs11875        | MGST1     | 12 | 16408261 | 2 | 5.103265 |
| rs941047       | RERGL     | 12 | 18125364 | 1 | 2.672494 |
| rs12312266     | PIK3C2G   | 12 | 18540324 | 3 | 0.851455 |
| rs12312266     | PIK3C2G   | 12 | 18540324 | 8 | 7.264722 |
| rs11044142     | PIK3C2G   | 12 | 18547492 | 1 | 4.948025 |
| rs11044142     | PIK3C2G   | 12 | 18547492 | 5 | 7.037895 |
| rs10505830     | PLCZ1     | 12 | 18732382 | 5 | 0.533317 |
| rs1075421      | CAPZA3    | 12 | 18782346 | 1 | 0.368547 |
| rs1075421      | CAPZA3    | 12 | 18782346 | 7 | 1.24965  |
| rs1075421      | CAPZA3    | 12 | 18782346 | 4 | 0.468381 |
| rs1844950      | LOC400013 | 12 | 19985791 | 6 | 0.199111 |
| rs4149117      | SLCO1B3   | 12 | 20902747 | 3 | 0.767396 |
| SNP12-20919475 | SLCO1B3   | 12 | 20919475 | 7 | 2.001443 |
| SNP12-20919475 | SLCO1B3   | 12 | 20919475 | 2 | 4.90341  |
| rs11045676     | LST-3TM12 | 12 | 21087691 | 4 | 0.519637 |
| rs4149056      | SLCO1B1   | 12 | 21222816 | 3 | 2.700069 |
| rs4149056      | SLCO1B1   | 12 | 21222816 | 1 | 1.927104 |
| rs4149057      | SLCO1B1   | 12 | 21222866 | 1 | 0.63803  |
| rs4149087      | SLCO1B1   | 12 | 21283829 | 1 | 1.726015 |
| rs4149087      | SLCO1B1   | 12 | 21283829 | 3 | 1.559442 |
| rs4149088      | SLCO1B1   | 12 | 21283853 | 3 | 2.663321 |
| rs4149088      | SLCO1B1   | 12 | 21283853 | 2 | 1.840059 |
| rs4149088      | SLCO1B1   | 12 | 21283853 | 6 | 2.91977  |
| rs2058464      | PYROXD1   | 12 | 21481888 | 4 | 4.091116 |
| rs2058464      | PYROXD1   | 12 | 21481888 | 3 | 0.657805 |
| rs2058464      | PYROXD1   | 12 | 21481888 | 6 | 0.283782 |
| rs2058464      | PYROXD1   | 12 | 21481888 | 8 | 0.188808 |
| rs2110161      | GOLT1B    | 12 | 21561122 | 1 | 3.820281 |
| rs11046097     | GOLT1B    | 12 | 21561151 | 5 | 10.28052 |
| rs936          | GYS2      | 12 | 21581003 | 4 | 1.08006  |
| rs936          | GYS2      | 12 | 21581003 | 1 | 0.874368 |
| rs936          | GYS2      | 12 | 21581003 | 7 | 0.105845 |
| rs936          | GYS2      | 12 | 21581003 | 2 | 0.102668 |
| rs704219       | ST8SIA1   | 12 | 22246188 | 3 | 0.81277  |
| rs3803101      | ST8SIA1   | 12 | 22378575 | 7 | 2.445204 |
| rs3803101      | ST8SIA1   | 12 | 22378575 | 3 | 0.470769 |
| rs2292488      | KIAA0528  | 12 | 22588690 | 8 | 0.893907 |
| rs2129613      | ETNK1     | 12 | 22731003 | 3 | 0.792224 |
| rs2129613      | ETNK1     | 12 | 22731003 | 1 | 3.316269 |
| rs1043881      | BCAT1     | 12 | 24855650 | 8 | 0.085379 |
| rs1043881      | BCAT1     | 12 | 24855650 | 4 | 0.362836 |
| rs1872644      | BCAT1     | 12 | 24858424 | 6 | 3.676037 |
| rs1872644      | BCAT1     | 12 | 24858424 | 3 | 1.543612 |
| rs1872644      | BCAT1     | 12 | 24858424 | 4 | 0.852965 |

|            |           |    |          |   |          |
|------------|-----------|----|----------|---|----------|
| rs1872644  | BCAT1     | 12 | 24858424 | 1 | 2.596019 |
| rs1872645  | BCAT1     | 12 | 24858479 | 6 | 0.574332 |
| rs1872645  | BCAT1     | 12 | 24858479 | 3 | 0.782984 |
| rs1872645  | BCAT1     | 12 | 24858479 | 1 | 2.924054 |
| rs1872645  | BCAT1     | 12 | 24858479 | 4 | 0.607572 |
| rs6487419  | BCAT1     | 12 | 24858737 | 6 | 0.265938 |
| rs6487419  | BCAT1     | 12 | 24858737 | 4 | 0.198395 |
| rs1054281  | BCAT1     | 12 | 24859042 | 3 | 0.065731 |
| rs1054281  | BCAT1     | 12 | 24859042 | 1 | 4.426697 |
| rs1054281  | BCAT1     | 12 | 24859042 | 6 | 0.315544 |
| rs1054281  | BCAT1     | 12 | 24859042 | 4 | 0.750835 |
| rs1054279  | BCAT1     | 12 | 24859336 | 1 | 4.94418  |
| rs1054279  | BCAT1     | 12 | 24859336 | 4 | 0.307196 |
| rs1054279  | BCAT1     | 12 | 24859336 | 3 | 0.258467 |
| rs1054277  | BCAT1     | 12 | 24859398 | 6 | 0.027575 |
| rs1054277  | BCAT1     | 12 | 24859398 | 4 | 3.577537 |
| rs1054277  | BCAT1     | 12 | 24859398 | 1 | 2.742525 |
| rs1054277  | BCAT1     | 12 | 24859398 | 3 | 0.163625 |
| rs6487420  | BCAT1     | 12 | 24859417 | 6 | 0.071169 |
| rs6487420  | BCAT1     | 12 | 24859417 | 4 | 2.644639 |
| rs6487420  | BCAT1     | 12 | 24859417 | 1 | 3.675415 |
| rs6487420  | BCAT1     | 12 | 24859417 | 3 | 0.598946 |
| rs1471842  | BCAT1     | 12 | 24860095 | 6 | 3.625798 |
| rs1471842  | BCAT1     | 12 | 24860095 | 4 | 2.920663 |
| rs1471842  | BCAT1     | 12 | 24860095 | 1 | 4.237644 |
| rs1471842  | BCAT1     | 12 | 24860095 | 3 | 0.809431 |
| rs2046524  | BCAT1     | 12 | 24860321 | 1 | 3.905419 |
| rs2046524  | BCAT1     | 12 | 24860321 | 6 | 0.713964 |
| rs2046524  | BCAT1     | 12 | 24860321 | 4 | 0.663162 |
| rs2046524  | BCAT1     | 12 | 24860321 | 3 | 0.829166 |
| rs7305794  | BCAT1     | 12 | 24860894 | 6 | 1.171912 |
| rs7305794  | BCAT1     | 12 | 24860894 | 4 | 0.515191 |
| rs7305794  | BCAT1     | 12 | 24860894 | 3 | 0.128866 |
| rs7305794  | BCAT1     | 12 | 24860894 | 1 | 1.662527 |
| rs6487421  | BCAT1     | 12 | 24861502 | 6 | 1.039458 |
| rs6487421  | BCAT1     | 12 | 24861502 | 4 | 0.517951 |
| rs6487421  | BCAT1     | 12 | 24861502 | 3 | 1.185508 |
| rs6487421  | BCAT1     | 12 | 24861502 | 1 | 3.581275 |
| rs2200509  | BCAT1     | 12 | 24861855 | 3 | 0.40825  |
| rs2200509  | BCAT1     | 12 | 24861855 | 4 | 0.039259 |
| rs2200509  | BCAT1     | 12 | 24861855 | 1 | 2.437757 |
| rs2200509  | BCAT1     | 12 | 24861855 | 6 | 0.223076 |
| rs2220269  | BCAT1     | 12 | 24861975 | 3 | 0.241651 |
| rs2220269  | BCAT1     | 12 | 24861975 | 1 | 3.557285 |
| rs2220269  | BCAT1     | 12 | 24861975 | 4 | 0.505788 |
| rs2220269  | BCAT1     | 12 | 24861975 | 6 | 0.268679 |
| rs16928315 | LOC196415 | 12 | 25038459 | 5 | 4.115056 |

|                |             |    |          |   |          |
|----------------|-------------|----|----------|---|----------|
| rs1908946      | LRMP        | 12 | 25134382 | 6 | 0.60083  |
| rs1908946      | LRMP        | 12 | 25134382 | 8 | 0.450449 |
| rs1908946      | LRMP        | 12 | 25134382 | 7 | 1.526155 |
| rs1908946      | LRMP        | 12 | 25134382 | 5 | 1.174548 |
| rs10842496     | CASC1       | 12 | 25202756 | 4 | 0.773814 |
| rs10842496     | CASC1       | 12 | 25202756 | 5 | 0.612903 |
| rs12313736     | SSPN        | 12 | 26275226 | 2 | 2.924317 |
| rs17381729     | SSPN        | 12 | 26276878 | 7 | 0.970152 |
| rs17381729     | SSPN        | 12 | 26276878 | 2 | 1.992149 |
| rs9214         | SSPN        | 12 | 26277053 | 5 | 0.081043 |
| rs9214         | SSPN        | 12 | 26277053 | 3 | 0.110593 |
| rs2230376      | ITPR2       | 12 | 26624254 | 6 | 0.008453 |
| rs2230376      | ITPR2       | 12 | 26624254 | 7 | 0.526121 |
| rs2230376      | ITPR2       | 12 | 26624254 | 5 | 0.170352 |
| rs2230376      | ITPR2       | 12 | 26624254 | 1 | 5.203889 |
| rs2230375      | ITPR2       | 12 | 26624329 | 5 | 1.411892 |
| rs2230375      | ITPR2       | 12 | 26624329 | 1 | 4.951081 |
| rs2230375      | ITPR2       | 12 | 26624329 | 6 | 4.47471  |
| rs2230375      | ITPR2       | 12 | 26624329 | 7 | 0.472328 |
| rs2230377      | ITPR2       | 12 | 26641098 | 7 | 0.450213 |
| rs2230377      | ITPR2       | 12 | 26641098 | 5 | 0.365943 |
| rs2230377      | ITPR2       | 12 | 26641098 | 1 | 3.819921 |
| rs3963548      | MED21       | 12 | 27066761 | 3 | 2.104338 |
| rs708165       | hCG_1794298 | 12 | 27125467 | 2 | 0.632903 |
| rs12228215     | hCG_1794298 | 12 | 27126546 | 1 | 4.441467 |
| rs12228215     | hCG_1794298 | 12 | 27126546 | 6 | 2.275855 |
| rs411816       | LOC341346   | 12 | 27519072 | 6 | 2.973014 |
| rs411816       | LOC341346   | 12 | 27519072 | 2 | 3.231154 |
| rs411816       | LOC341346   | 12 | 27519072 | 5 | 0.231164 |
| SNP12-27692013 | PPFIBP1     | 12 | 27692013 | 2 | 3.150522 |
| SNP12-27692013 | PPFIBP1     | 12 | 27692013 | 3 | 3.179822 |
| SNP12-27692013 | PPFIBP1     | 12 | 27692013 | 7 | 3.117917 |
| SNP12-27692013 | PPFIBP1     | 12 | 27692013 | 8 | 11.72038 |
| SNP12-27692013 | PPFIBP1     | 12 | 27692013 | 4 | 7.833741 |
| SNP12-27692013 | PPFIBP1     | 12 | 27692013 | 1 | 2.852279 |
| SNP12-27692013 | PPFIBP1     | 12 | 27692013 | 6 | 5.120539 |
| SNP12-27692013 | PPFIBP1     | 12 | 27692013 | 5 | 3.579013 |
| rs12819160     | REP15       | 12 | 27741380 | 4 | 0.061842 |
| rs12819160     | REP15       | 12 | 27741380 | 3 | 0.440619 |
| SNP12-29487632 | OVCH1       | 12 | 29487632 | 6 | 1.258384 |
| rs7967676      | OVCH1       | 12 | 29489559 | 5 | 0.965981 |
| rs7967676      | OVCH1       | 12 | 29489559 | 2 | 0.750518 |
| rs1347570      | OVCH1       | 12 | 29495659 | 7 | 1.082821 |
| rs1347570      | OVCH1       | 12 | 29495659 | 1 | 0.079979 |
| rs1347570      | OVCH1       | 12 | 29495659 | 2 | 3.167267 |
| rs11050243     | OVCH1       | 12 | 29508817 | 6 | 1.063326 |
| rs11050243     | OVCH1       | 12 | 29508817 | 5 | 1.612502 |

|                |           |    |          |   |          |
|----------------|-----------|----|----------|---|----------|
| rs2043623      | OVCH1     | 12 | 29519283 | 5 | 0.931107 |
| rs2043623      | OVCH1     | 12 | 29519283 | 1 | 1.012865 |
| rs3847680      | OVCH1     | 12 | 29530453 | 7 | 2.578869 |
| rs3847680      | OVCH1     | 12 | 29530453 | 4 | 0.15537  |
| rs967181       | OVCH1     | 12 | 29533840 | 7 | 0.836545 |
| rs10843438     | OVCH1     | 12 | 29539542 | 6 | 0.212442 |
| rs10843438     | OVCH1     | 12 | 29539542 | 7 | 2.041344 |
| rs10843438     | OVCH1     | 12 | 29539542 | 4 | 0.470037 |
| rs6487834      | TMTC1     | 12 | 29548400 | 1 | 0.045952 |
| rs6487834      | TMTC1     | 12 | 29548400 | 2 | 2.259661 |
| rs11834712     | TMTC1     | 12 | 29549461 | 5 | 0.351226 |
| rs11834712     | TMTC1     | 12 | 29549461 | 1 | 0.145827 |
| rs11834712     | TMTC1     | 12 | 29549461 | 2 | 1.176299 |
| rs11834712     | TMTC1     | 12 | 29549461 | 8 | 6.049682 |
| rs4931199      | TMTC1     | 12 | 29550042 | 7 | 0.356186 |
| rs4931199      | TMTC1     | 12 | 29550042 | 3 | 0.566949 |
| rs12809335     | IPO8      | 12 | 30739942 | 3 | 0.554772 |
| rs12809335     | IPO8      | 12 | 30739942 | 4 | 5.981275 |
| SNP12-30770243 | CAPRIN2   | 12 | 30770243 | 2 | 4.409315 |
| SNP12-30770243 | CAPRIN2   | 12 | 30770243 | 5 | 3.915348 |
| SNP12-30770243 | CAPRIN2   | 12 | 30770243 | 4 | 0.247507 |
| rs17688567     | CAPRIN2   | 12 | 30797625 | 5 | 1.462102 |
| rs17688567     | CAPRIN2   | 12 | 30797625 | 6 | 1.480881 |
| rs17688567     | CAPRIN2   | 12 | 30797625 | 4 | 3.538576 |
| rs2075333      | TSPAN11   | 12 | 31026846 | 6 | 1.1841   |
| rs2075333      | TSPAN11   | 12 | 31026846 | 1 | 0.112999 |
| rs35076        | TSPAN11   | 12 | 31036151 | 3 | 0.102203 |
| rs35076        | TSPAN11   | 12 | 31036151 | 1 | 0.613859 |
| rs2075322      | DDX11     | 12 | 31141128 | 1 | 6.873134 |
| rs2075322      | DDX11     | 12 | 31141128 | 4 | 0.617118 |
| rs2075322      | DDX11     | 12 | 31141128 | 7 | 0.694376 |
| rs11051266     | OVOS2     | 12 | 31180222 | 4 | 4.743429 |
| rs11051266     | OVOS2     | 12 | 31180222 | 8 | 3.745695 |
| rs11051266     | OVOS2     | 12 | 31180222 | 2 | 1.825621 |
| rs11051266     | OVOS2     | 12 | 31180222 | 1 | 5.342634 |
| rs11051266     | OVOS2     | 12 | 31180222 | 5 | 3.486775 |
| rs11051274     | OVOS2     | 12 | 31193155 | 1 | 4.697006 |
| rs11051274     | OVOS2     | 12 | 31193155 | 5 | 0.443996 |
| rs7966525      | MGC50559  | 12 | 31713091 | 7 | 1.124059 |
| rs3759295      | LOC440093 | 12 | 31836252 | 4 | 1.836223 |
| rs16919122     | C12orf35  | 12 | 32026082 | 5 | 0.269763 |
| rs16919122     | C12orf35  | 12 | 32026082 | 6 | 5.394612 |
| rs3207618      | C12orf35  | 12 | 32026193 | 1 | 5.631402 |
| rs3759302      | C12orf35  | 12 | 32026453 | 5 | 0.00807  |
| rs3759301      | C12orf35  | 12 | 32026708 | 3 | 0.153247 |
| rs3759299      | C12orf35  | 12 | 32028779 | 3 | 0.02456  |
| rs3759297      | C12orf35  | 12 | 32029119 | 5 | 4.989743 |

|                |           |    |          |   |          |
|----------------|-----------|----|----------|---|----------|
| rs1151016      | LOC729457 | 12 | 32150634 | 4 | 0.915164 |
| rs11051966     | BICD1     | 12 | 32421847 | 1 | 1.052031 |
| rs11051966     | BICD1     | 12 | 32421847 | 6 | 1.66398  |
| rs11051966     | BICD1     | 12 | 32421847 | 2 | 4.555833 |
| rs11052110     | FGD4      | 12 | 32668629 | 7 | 0.481607 |
| rs11052110     | FGD4      | 12 | 32668629 | 5 | 0.706178 |
| rs1059422      | DNM1L     | 12 | 32787632 | 5 | 0.008102 |
| rs1059422      | DNM1L     | 12 | 32787632 | 2 | 3.533295 |
| rs1059422      | DNM1L     | 12 | 32787632 | 1 | 1.14802  |
| rs1059422      | DNM1L     | 12 | 32787632 | 4 | 0.387863 |
| rs1059422      | DNM1L     | 12 | 32787632 | 7 | 0.176566 |
| rs1020670      | DNM1L     | 12 | 32787882 | 7 | 1.672401 |
| rs1020670      | DNM1L     | 12 | 32787882 | 2 | 5.358761 |
| rs1020670      | DNM1L     | 12 | 32787882 | 4 | 0.62914  |
| rs1020670      | DNM1L     | 12 | 32787882 | 1 | 0.121229 |
| rs1020670      | DNM1L     | 12 | 32787882 | 5 | 0.287369 |
| rs3759139      | CPNE8     | 12 | 37373876 | 4 | 3.157355 |
| rs3759139      | CPNE8     | 12 | 37373876 | 7 | 0.048903 |
| rs3759139      | CPNE8     | 12 | 37373876 | 1 | 4.841079 |
| rs35598213     | CPNE8     | 12 | 37410361 | 2 | 1.19222  |
| SNP12-38021615 | KIF21A    | 12 | 38021615 | 5 | 0.049451 |
| rs11173440     | SLC2A13   | 12 | 38435649 | 4 | 0.207414 |
| rs4322461      | SLC2A13   | 12 | 38437190 | 4 | 0.19366  |
| rs10735885     | SLC2A13   | 12 | 38437813 | 4 | 4.998029 |
| SNP12-38708546 | SLC2A13   | 12 | 38708546 | 8 | 0.1617   |
| SNP12-38708546 | SLC2A13   | 12 | 38708546 | 7 | 1.424652 |
| SNP12-38708546 | SLC2A13   | 12 | 38708546 | 3 | 1.61984  |
| SNP12-38708546 | SLC2A13   | 12 | 38708546 | 4 | 0.563811 |
| SNP12-38708546 | SLC2A13   | 12 | 38708546 | 2 | 3.630745 |
| SNP12-38708546 | SLC2A13   | 12 | 38708546 | 6 | 0.220721 |
| SNP12-38708546 | SLC2A13   | 12 | 38708546 | 5 | 0.788442 |
| SNP12-38708546 | SLC2A13   | 12 | 38708546 | 1 | 0.653526 |
| rs10878245     | LRRK2     | 12 | 38918058 | 2 | 4.869528 |
| rs7966550      | LRRK2     | 12 | 38974962 | 2 | 2.67355  |
| rs7966550      | LRRK2     | 12 | 38974962 | 8 | 0.299066 |
| rs11176013     | LRRK2     | 12 | 39000140 | 3 | 0.411291 |
| rs11564148     | LRRK2     | 12 | 39000168 | 6 | 5.799387 |
| rs11564148     | LRRK2     | 12 | 39000168 | 3 | 0.437933 |
| rs11564148     | LRRK2     | 12 | 39000168 | 2 | 1.050991 |
| rs10878371     | LRRK2     | 12 | 39002527 | 3 | 0.450482 |
| rs3761863      | LRRK2     | 12 | 39044919 | 2 | 2.114093 |
| rs3761863      | LRRK2     | 12 | 39044919 | 8 | 6.295028 |
| rs3761863      | LRRK2     | 12 | 39044919 | 3 | 1.192834 |
| rs10878441     | LRRK2     | 12 | 39048198 | 8 | 5.757386 |
| rs10878441     | LRRK2     | 12 | 39048198 | 2 | 4.94744  |
| rs10878441     | LRRK2     | 12 | 39048198 | 3 | 0.547635 |
| rs3886747      | LRRK2     | 12 | 39048218 | 8 | 4.770317 |



|            |           |    |          |   |          |
|------------|-----------|----|----------|---|----------|
| rs10784548 | LRRK2     | 12 | 39048813 | 2 | 2.754817 |
| rs10784548 | LRRK2     | 12 | 39048813 | 8 | 0.415537 |
| rs10784548 | LRRK2     | 12 | 39048813 | 3 | 0.71575  |
| rs11564245 | MUC19     | 12 | 39109621 | 5 | 0.102389 |
| rs11564245 | MUC19     | 12 | 39109621 | 6 | 0.036606 |
| rs2114567  | MUC19     | 12 | 39111754 | 1 | 1.213644 |
| rs7966110  | MUC19     | 12 | 39122001 | 3 | 1.586309 |
| rs11176655 | MUC19     | 12 | 39122016 | 7 | 4.786028 |
| rs1492313  | MUC19     | 12 | 39159293 | 3 | 0.128856 |
| rs1492313  | MUC19     | 12 | 39159293 | 4 | 0.198861 |
| rs2588400  | MUC19     | 12 | 39159518 | 2 | 2.529746 |
| rs2588400  | MUC19     | 12 | 39159518 | 4 | 3.972191 |
| rs2588411  | MUC19     | 12 | 39164719 | 3 | 0.065091 |
| rs2638868  | MUC19     | 12 | 39166327 | 3 | 0.389685 |
| rs2638868  | MUC19     | 12 | 39166327 | 7 | 0.22152  |
| rs2638868  | MUC19     | 12 | 39166327 | 1 | 2.243546 |
| rs2638868  | MUC19     | 12 | 39166327 | 4 | 0.470511 |
| rs2197356  | MUC19     | 12 | 39180255 | 7 | 0.194167 |
| rs2197356  | MUC19     | 12 | 39180255 | 1 | 3.38022  |
| rs4768288  | MUC19     | 12 | 39208358 | 5 | 2.384769 |
| rs4768288  | MUC19     | 12 | 39208358 | 1 | 0.724723 |
| rs1444220  | MUC19     | 12 | 39208371 | 4 | 3.057191 |
| rs1444220  | MUC19     | 12 | 39208371 | 5 | 3.052437 |
| rs935105   | CNTN1     | 12 | 39616878 | 3 | 0.458695 |
| rs935105   | CNTN1     | 12 | 39616878 | 4 | 0.432796 |
| rs935105   | CNTN1     | 12 | 39616878 | 8 | 7.637064 |
| rs2406567  | YAF2      | 12 | 40837746 | 1 | 5.665498 |
| rs2406567  | YAF2      | 12 | 40837746 | 5 | 0.386686 |
| rs2406567  | YAF2      | 12 | 40837746 | 6 | 5.095947 |
| rs2406567  | YAF2      | 12 | 40837746 | 8 | 0.523279 |
| rs2406567  | YAF2      | 12 | 40837746 | 7 | 0.166777 |
| rs2406567  | YAF2      | 12 | 40837746 | 3 | 0.214117 |
| rs11181355 | YAF2      | 12 | 40838113 | 6 | 5.200976 |
| rs7968314  | LOC727884 | 12 | 40967935 | 3 | 4.10565  |
| rs7968314  | LOC727884 | 12 | 40967935 | 7 | 5.402549 |
| rs7968314  | LOC727884 | 12 | 40967935 | 5 | 0.14657  |
| rs7968314  | LOC727884 | 12 | 40967935 | 8 | 5.03416  |
| rs7295326  | LOC727884 | 12 | 40968332 | 3 | 5.843545 |
| rs7295326  | LOC727884 | 12 | 40968332 | 2 | 5.248809 |
| rs7295326  | LOC727884 | 12 | 40968332 | 7 | 2.144918 |
| rs7295326  | LOC727884 | 12 | 40968332 | 8 | 3.319148 |
| rs7295326  | LOC727884 | 12 | 40968332 | 5 | 4.231208 |
| rs7295326  | LOC727884 | 12 | 40968332 | 1 | 5.632441 |
| rs7295326  | LOC727884 | 12 | 40968332 | 6 | 5.022581 |
| rs7295326  | LOC727884 | 12 | 40968332 | 4 | 6.787029 |
| rs12371762 | LOC727884 | 12 | 40968618 | 5 | 4.647023 |
| rs12371762 | LOC727884 | 12 | 40968618 | 6 | 3.435349 |

|                |               |    |          |   |          |
|----------------|---------------|----|----------|---|----------|
| rs12371762     | LOC727884     | 12 | 40968618 | 3 | 5.096076 |
| rs12371762     | LOC727884     | 12 | 40968618 | 8 | 4.845126 |
| rs3747560      | ZCRB1         | 12 | 41006157 | 2 | 0.810365 |
| rs3747560      | ZCRB1         | 12 | 41006157 | 7 | 1.821953 |
| rs3747560      | ZCRB1         | 12 | 41006157 | 6 | 2.007374 |
| rs3747560      | ZCRB1         | 12 | 41006157 | 3 | 0.973927 |
| rs3747560      | ZCRB1         | 12 | 41006157 | 5 | 0.957946 |
| rs10506226     | ADAMTS20      | 12 | 42055495 | 1 | 3.435895 |
| rs11182088     | ADAMTS20      | 12 | 42146793 | 5 | 2.7598   |
| rs11182235     | PUS7L         | 12 | 42410062 | 7 | 0.244897 |
| rs4251545      | IRAK4         | 12 | 42466562 | 7 | 0.937084 |
| rs7974460      | TMEM117       | 12 | 43069390 | 2 | 3.876509 |
| rs3803178      | TMEM16F       | 12 | 44110848 | 4 | 5.758322 |
| rs724909       | SFRS2IP       | 12 | 44609978 | 1 | 3.538594 |
| rs724909       | SFRS2IP       | 12 | 44609978 | 7 | 0.6078   |
| rs724909       | SFRS2IP       | 12 | 44609978 | 4 | 0.934035 |
| rs724909       | SFRS2IP       | 12 | 44609978 | 3 | 0.538861 |
| rs2242355      | SLC38A1       | 12 | 44948752 | 3 | 0.875139 |
| rs2242355      | SLC38A1       | 12 | 44948752 | 4 | 1.39402  |
| rs2242355      | SLC38A1       | 12 | 44948752 | 5 | 0.166383 |
| rs11183605     | SLC38A4       | 12 | 45445235 | 4 | 0.470077 |
| rs12582305     | SLC38A4       | 12 | 45445262 | 8 | 0.10339  |
| rs2430921      | SLC38A4       | 12 | 45445463 | 4 | 1.023991 |
| rs2429467      | SLC38A4       | 12 | 45473037 | 3 | 0.21617  |
| rs2429467      | SLC38A4       | 12 | 45473037 | 2 | 5.196938 |
| rs2244818      | FAM113B       | 12 | 45915635 | 8 | 4.147722 |
| rs215351       | LOC643063     | 12 | 46021667 | 5 | 1.279234 |
| rs215351       | LOC643063     | 12 | 46021667 | 3 | 1.133123 |
| rs215351       | LOC643063     | 12 | 46021667 | 8 | 1.179246 |
| rs9859         | HDAC7A        | 12 | 46463167 | 7 | 0.256446 |
| rs9859         | HDAC7A        | 12 | 46463167 | 4 | 10.18748 |
| rs3847987      | VDR           | 12 | 46524335 | 5 | 0.187179 |
| rs3847987      | VDR           | 12 | 46524335 | 7 | 0.248446 |
| rs3847987      | VDR           | 12 | 46524335 | 2 | 4.490133 |
| rs10735810     | VDR           | 12 | 46559162 | 3 | 1.108249 |
| rs10735810     | VDR           | 12 | 46559162 | 6 | 0.603801 |
| rs10735810     | VDR           | 12 | 46559162 | 1 | 0.76925  |
| rs10735810     | VDR           | 12 | 46559162 | 2 | 0.413888 |
| rs11168293     | VDR           | 12 | 46579983 | 8 | 6.435713 |
| rs11168293     | VDR           | 12 | 46579983 | 1 | 6.3246   |
| rs11168293     | VDR           | 12 | 46579983 | 6 | 1.178325 |
| rs11168293     | VDR           | 12 | 46579983 | 4 | 1.009304 |
| rs2070739      | COL2A1        | 12 | 46654243 | 7 | 0.41652  |
| rs12721379     | COL2A1        | 12 | 46654352 | 7 | 1.527465 |
| SNP12-46654808 | COL2A1        | 12 | 46654808 | 1 | 6.030547 |
| rs7487682      | LOC387856     | 12 | 46865932 | 7 | 0.46613  |
| rs11168453     | DKFZP779L1853 | 12 | 46878606 | 7 | 0.477714 |

|                |               |    |          |   |          |
|----------------|---------------|----|----------|---|----------|
| rs11168453     | DKFZP779L1853 | 12 | 46878606 | 5 | 3.614543 |
| rs10506276     | DKFZP779L1853 | 12 | 46880781 | 4 | 0.076664 |
| rs10506277     | DKFZP779L1853 | 12 | 46880886 | 4 | 0.649798 |
| rs11168459     | OR10AD1       | 12 | 46882508 | 6 | 1.015652 |
| rs11168459     | OR10AD1       | 12 | 46882508 | 8 | 0.889759 |
| rs17224674     | OR10AD1       | 12 | 46882846 | 4 | 0.961334 |
| rs17823193     | OR10AD1       | 12 | 46883157 | 4 | 3.843255 |
| rs17122812     | OR10AD1       | 12 | 46883320 | 8 | 2.591222 |
| rs17122812     | OR10AD1       | 12 | 46883320 | 6 | 1.526494 |
| rs11458        | C12orf54      | 12 | 47174861 | 8 | 0.190904 |
| rs11458        | C12orf54      | 12 | 47174861 | 2 | 3.101323 |
| rs11458        | C12orf54      | 12 | 47174861 | 4 | 0.133226 |
| rs2232565      | LALBA         | 12 | 47249288 | 1 | 0.400261 |
| rs3741628      | C12orf41      | 12 | 47335005 | 3 | 0.161945 |
| rs3741628      | C12orf41      | 12 | 47335005 | 5 | 0.401049 |
| rs3741628      | C12orf41      | 12 | 47335005 | 6 | 3.282103 |
| rs3741628      | C12orf41      | 12 | 47335005 | 7 | 1.572662 |
| rs3013         | CCNT1         | 12 | 47373923 | 3 | 0.621179 |
| rs2291728      | CCNT1         | 12 | 47396849 | 5 | 0.364855 |
| rs1057908      | DDX23         | 12 | 47516302 | 3 | 0.693199 |
| rs1057908      | DDX23         | 12 | 47516302 | 1 | 5.249254 |
| rs1057908      | DDX23         | 12 | 47516302 | 8 | 4.762302 |
| rs1565933      | RND1          | 12 | 47542065 | 3 | 0.106406 |
| rs3809147      | CCDC65        | 12 | 47584326 | 6 | 0.62306  |
| rs3809147      | CCDC65        | 12 | 47584326 | 3 | 0.707631 |
| rs3809147      | CCDC65        | 12 | 47584326 | 5 | 0.236832 |
| SNP12-47594551 | CCDC65        | 12 | 47594551 | 4 | 0.949397 |
| SNP12-47594551 | CCDC65        | 12 | 47594551 | 6 | 0.057179 |
| SNP12-47594551 | CCDC65        | 12 | 47594551 | 2 | 0.964626 |
| SNP12-47594551 | CCDC65        | 12 | 47594551 | 3 | 0.817845 |
| SNP12-47594551 | CCDC65        | 12 | 47594551 | 5 | 0.957523 |
| SNP12-47597054 | CCDC65        | 12 | 47597054 | 4 | 0.368457 |
| SNP12-47597054 | CCDC65        | 12 | 47597054 | 3 | 0.766782 |
| SNP12-47598807 | CCDC65        | 12 | 47598807 | 4 | 0.765646 |
| SNP12-47598807 | CCDC65        | 12 | 47598807 | 3 | 0.112611 |
| rs10875894     | CCDC65        | 12 | 47601129 | 3 | 1.051981 |
| rs10875894     | CCDC65        | 12 | 47601129 | 5 | 0.549718 |
| rs10875894     | CCDC65        | 12 | 47601129 | 4 | 0.505945 |
| rs4760600      | CCDC65        | 12 | 47601261 | 3 | 0.324259 |
| rs4760600      | CCDC65        | 12 | 47601261 | 4 | 5.916472 |
| rs4760600      | CCDC65        | 12 | 47601261 | 2 | 5.256187 |
| rs4760600      | CCDC65        | 12 | 47601261 | 5 | 6.052627 |
| rs4760600      | CCDC65        | 12 | 47601261 | 6 | 2.685364 |
| rs3741627      | WNT10B        | 12 | 47645854 | 3 | 0.242839 |
| rs3741627      | WNT10B        | 12 | 47645854 | 6 | 6.492293 |
| rs3741627      | WNT10B        | 12 | 47645854 | 4 | 0.265303 |
| rs3741627      | WNT10B        | 12 | 47645854 | 5 | 0.031788 |

|                |           |    |          |   |          |
|----------------|-----------|----|----------|---|----------|
| rs10783299     | DDN       | 12 | 47676944 | 2 | 2.16568  |
| rs10783299     | DDN       | 12 | 47676944 | 1 | 0.078277 |
| rs3782357      | MLL2      | 12 | 47713919 | 1 | 0.460588 |
| rs3782357      | MLL2      | 12 | 47713919 | 6 | 5.139888 |
| rs10747561     | LMBR1L    | 12 | 47786776 | 6 | 5.620928 |
| rs10747561     | LMBR1L    | 12 | 47786776 | 2 | 4.652408 |
| rs1150057      | KCNH3     | 12 | 48224080 | 3 | 0.092023 |
| rs7953534      | LOC283331 | 12 | 48484147 | 6 | 0.024071 |
| rs7953534      | LOC283331 | 12 | 48484147 | 3 | 1.517439 |
| rs7953534      | LOC283331 | 12 | 48484147 | 2 | 4.356709 |
| rs4898510      | BCDIN3D   | 12 | 48518958 | 5 | 0.478903 |
| rs1044677      | FAIM2     | 12 | 48547092 | 5 | 2.10165  |
| rs1044677      | FAIM2     | 12 | 48547092 | 4 | 0.709651 |
| rs1044677      | FAIM2     | 12 | 48547092 | 6 | 3.706727 |
| rs1064722      | FAIM2     | 12 | 48547596 | 1 | 0.31002  |
| rs1064722      | FAIM2     | 12 | 48547596 | 7 | 1.414389 |
| rs1064722      | FAIM2     | 12 | 48547596 | 5 | 0.022637 |
| rs1454193      | FAIM2     | 12 | 48548036 | 7 | 1.035077 |
| rs1454193      | FAIM2     | 12 | 48548036 | 5 | 0.241494 |
| rs426496       | AQP2      | 12 | 48634345 | 5 | 0.265265 |
| rs467323       | AQP2      | 12 | 48636032 | 3 | 0.540383 |
| rs2878771      | AQP2      | 12 | 48638660 | 5 | 0.446405 |
| rs2878771      | AQP2      | 12 | 48638660 | 6 | 1.855781 |
| rs2878771      | AQP2      | 12 | 48638660 | 2 | 1.27454  |
| rs2878771      | AQP2      | 12 | 48638660 | 3 | 0.616055 |
| rs2878771      | AQP2      | 12 | 48638660 | 1 | 0.453283 |
| rs653576       | ACCN2     | 12 | 48738975 | 8 | 5.951782 |
| rs836180       | GPD1      | 12 | 48789536 | 1 | 0.082437 |
| rs836180       | GPD1      | 12 | 48789536 | 8 | 0.506809 |
| rs7532         | LASS5     | 12 | 48810231 | 8 | 7.547651 |
| rs7532         | LASS5     | 12 | 48810231 | 2 | 1.727182 |
| rs7532         | LASS5     | 12 | 48810231 | 1 | 0.279471 |
| rs3741562      | LASS5     | 12 | 48816003 | 1 | 5.858983 |
| rs3741562      | LASS5     | 12 | 48816003 | 8 | 0.702835 |
| rs3741562      | LASS5     | 12 | 48816003 | 4 | 0.381368 |
| rs7302981      | LASS5     | 12 | 48824082 | 1 | 0.485187 |
| rs7302981      | LASS5     | 12 | 48824082 | 2 | 1.169454 |
| rs7302981      | LASS5     | 12 | 48824082 | 8 | 6.042248 |
| rs6580741      | LOC643275 | 12 | 49013973 | 1 | 3.679177 |
| rs6580742      | LOC643275 | 12 | 49014078 | 1 | 0.565897 |
| rs7296291      | LOC643275 | 12 | 49030386 | 1 | 1.052943 |
| rs7312252      | LOC643275 | 12 | 49030438 | 1 | 1.423011 |
| rs4421818      | LOC121006 | 12 | 49035561 | 4 | 0.507505 |
| rs4421818      | LOC121006 | 12 | 49035561 | 1 | 1.663017 |
| rs12303082     | LOC121006 | 12 | 49040830 | 1 | 2.636797 |
| SNP12-49366631 | DIP2B     | 12 | 49366631 | 4 | 6.751543 |
| SNP12-49366631 | DIP2B     | 12 | 49366631 | 7 | 0.384967 |

|                |           |    |          |   |          |
|----------------|-----------|----|----------|---|----------|
| rs11169524     | DIP2B     | 12 | 49376001 | 4 | 4.389194 |
| rs11169524     | DIP2B     | 12 | 49376001 | 5 | 0.091552 |
| rs11169524     | DIP2B     | 12 | 49376001 | 1 | 3.539818 |
| rs4768915      | DIP2B     | 12 | 49428150 | 8 | 9.143355 |
| rs17291650     | ATF1      | 12 | 49499700 | 1 | 5.219681 |
| rs861204       | TMPRSS12  | 12 | 49524083 | 1 | 3.993327 |
| rs11169736     | TFCP2     | 12 | 49852924 | 2 | 2.478844 |
| rs11169736     | TFCP2     | 12 | 49852924 | 8 | 4.393534 |
| rs11169736     | TFCP2     | 12 | 49852924 | 6 | 0.682892 |
| rs11169736     | TFCP2     | 12 | 49852924 | 5 | 1.105229 |
| SNP12-49950414 | LOC57228  | 12 | 49950414 | 1 | 6.328279 |
| rs1044981      | BIN2      | 12 | 49961133 | 6 | 0.930928 |
| rs1044981      | BIN2      | 12 | 49961133 | 5 | 0.282592 |
| rs7312857      | BIN2      | 12 | 49993893 | 4 | 3.706471 |
| SNP12-50009766 | ELA1      | 12 | 50009766 | 1 | 1.491902 |
| rs17860299     | ELA1      | 12 | 50023874 | 4 | 1.94394  |
| rs17860299     | ELA1      | 12 | 50023874 | 1 | 2.747481 |
| rs4761936      | LOC728476 | 12 | 50063395 | 5 | 0.940688 |
| rs4761936      | LOC728476 | 12 | 50063395 | 6 | 3.014251 |
| rs7305599      | SLC4A8    | 12 | 50187657 | 8 | 0.395199 |
| rs2292221      | SLC4A8    | 12 | 50188262 | 8 | 0.024883 |
| rs2292220      | SLC4A8    | 12 | 50188516 | 6 | 0.955133 |
| rs4761829      | SCN8A     | 12 | 50367232 | 1 | 0.804487 |
| rs60637        | SCN8A     | 12 | 50487009 | 1 | 0.867531 |
| rs3741705      | SCN8A     | 12 | 50488291 | 2 | 2.773767 |
| rs303782       | LOC728503 | 12 | 50527973 | 1 | 2.343791 |
| rs303782       | LOC728503 | 12 | 50527973 | 5 | 1.641294 |
| rs697633       | ANKRD33   | 12 | 50568187 | 5 | 1.396214 |
| rs697633       | ANKRD33   | 12 | 50568187 | 3 | 2.728242 |
| rs7303030      | ANKRD33   | 12 | 50570750 | 8 | 0.395174 |
| rs7303030      | ANKRD33   | 12 | 50570750 | 5 | 0.774431 |
| rs7303030      | ANKRD33   | 12 | 50570750 | 2 | 0.21717  |
| rs7303030      | ANKRD33   | 12 | 50570750 | 3 | 0.493783 |
| rs12368048     | ANKRD33   | 12 | 50570935 | 3 | 0.978164 |
| rs12368048     | ANKRD33   | 12 | 50570935 | 5 | 1.624776 |
| rs12368048     | ANKRD33   | 12 | 50570935 | 2 | 2.743409 |
| rs2252518      | ACVR1B    | 12 | 50667293 | 8 | 5.308931 |
| rs2603751      | NR4A1     | 12 | 50739549 | 1 | 0.743854 |
| rs3660         | KRT81     | 12 | 50966204 | 6 | 0.059803 |
| rs6580873      | KRT81     | 12 | 50968192 | 4 | 0.030691 |
| rs2852456      | KRT83     | 12 | 50994508 | 5 | 0.521531 |
| rs2852456      | KRT83     | 12 | 50994508 | 8 | 5.582062 |
| rs2852456      | KRT83     | 12 | 50994508 | 3 | 0.99393  |
| rs1732293      | KRT84     | 12 | 51060572 | 1 | 0.915596 |
| rs1732304      | KRT84     | 12 | 51065511 | 3 | 0.365357 |
| rs1732262      | KRT82     | 12 | 51074279 | 3 | 0.633294 |
| rs2852473      | KRT82     | 12 | 51074570 | 1 | 0.872645 |

|            |       |    |          |   |          |
|------------|-------|----|----------|---|----------|
| rs2852473  | KRT82 | 12 | 51074570 | 4 | 0.181771 |
| rs2852473  | KRT82 | 12 | 51074570 | 5 | 0.013142 |
| rs2852473  | KRT82 | 12 | 51074570 | 8 | 0.183524 |
| rs2852473  | KRT82 | 12 | 51074570 | 2 | 0.378552 |
| rs2658658  | KRT82 | 12 | 51075195 | 2 | 2.73097  |
| rs2293639  | KRT75 | 12 | 51104124 | 4 | 1.261627 |
| rs2293639  | KRT75 | 12 | 51104124 | 3 | 0.744535 |
| rs2293639  | KRT75 | 12 | 51104124 | 1 | 2.268425 |
| rs188462   | KRT75 | 12 | 51104337 | 7 | 0.977435 |
| rs188462   | KRT75 | 12 | 51104337 | 5 | 0.70449  |
| rs1798640  | KRT75 | 12 | 51111630 | 1 | 2.004204 |
| rs1798640  | KRT75 | 12 | 51111630 | 2 | 1.630144 |
| rs1798640  | KRT75 | 12 | 51111630 | 4 | 0.098864 |
| rs1798640  | KRT75 | 12 | 51111630 | 8 | 1.857673 |
| rs298109   | KRT75 | 12 | 51114085 | 8 | 2.402372 |
| rs298109   | KRT75 | 12 | 51114085 | 1 | 0.537002 |
| rs583678   | KRT6C | 12 | 51148881 | 1 | 1.130961 |
| rs583678   | KRT6C | 12 | 51148881 | 2 | 0.791637 |
| rs583678   | KRT6C | 12 | 51148881 | 4 | 0.337099 |
| rs11608915 | KRT6C | 12 | 51152327 | 8 | 3.61522  |
| rs11608915 | KRT6C | 12 | 51152327 | 4 | 3.021112 |
| rs11608915 | KRT6C | 12 | 51152327 | 2 | 4.206581 |
| rs11608915 | KRT6C | 12 | 51152327 | 1 | 3.394094 |
| rs11170164 | KRT5  | 12 | 51199935 | 2 | 1.92458  |
| rs12821071 | KRT5  | 12 | 51200478 | 4 | 0.702459 |
| rs12821071 | KRT5  | 12 | 51200478 | 7 | 7.517198 |
| rs665470   | KRT71 | 12 | 51232765 | 3 | 0.368402 |
| rs665522   | KRT71 | 12 | 51232810 | 6 | 0.181147 |
| rs628819   | KRT71 | 12 | 51233157 | 3 | 0.965337 |
| rs628819   | KRT71 | 12 | 51233157 | 6 | 1.779533 |
| rs13121    | KRT74 | 12 | 51245972 | 8 | 0.887696 |
| rs13121    | KRT74 | 12 | 51245972 | 1 | 0.513214 |
| rs584436   | KRT74 | 12 | 51246335 | 3 | 0.104513 |
| rs584436   | KRT74 | 12 | 51246335 | 2 | 0.628073 |
| rs584436   | KRT74 | 12 | 51246335 | 6 | 1.201708 |
| rs584436   | KRT74 | 12 | 51246335 | 1 | 1.886283 |
| rs11170183 | KRT72 | 12 | 51267709 | 4 | 5.569502 |
| rs11170183 | KRT72 | 12 | 51267709 | 3 | 2.373321 |
| rs11170183 | KRT72 | 12 | 51267709 | 5 | 3.180212 |
| rs12818575 | KRT72 | 12 | 51270887 | 3 | 0.218943 |
| rs12833456 | KRT72 | 12 | 51272454 | 3 | 0.165798 |
| rs2634041  | KRT2  | 12 | 51331893 | 5 | 1.158835 |
| rs2634041  | KRT2  | 12 | 51331893 | 4 | 1.751577 |
| rs2634041  | KRT2  | 12 | 51331893 | 2 | 1.633736 |
| rs2634041  | KRT2  | 12 | 51331893 | 6 | 3.536285 |
| rs2634041  | KRT2  | 12 | 51331893 | 1 | 1.103794 |
| rs2634041  | KRT2  | 12 | 51331893 | 3 | 1.638806 |

|                |           |    |          |   |          |
|----------------|-----------|----|----------|---|----------|
| rs10783528     | KRT77     | 12 | 51374751 | 6 | 2.863535 |
| rs10783528     | KRT77     | 12 | 51374751 | 1 | 2.312205 |
| rs1567759      | KRT77     | 12 | 51377833 | 5 | 1.752562 |
| rs1567759      | KRT77     | 12 | 51377833 | 7 | 3.702576 |
| rs1567759      | KRT77     | 12 | 51377833 | 1 | 4.166288 |
| rs668313       | KRT77     | 12 | 51377943 | 7 | 1.52202  |
| rs10876328     | LOC400036 | 12 | 51412714 | 8 | 2.118121 |
| rs10876328     | LOC400036 | 12 | 51412714 | 1 | 3.03151  |
| rs10876328     | LOC400036 | 12 | 51412714 | 5 | 2.219734 |
| rs2280481      | KRT76     | 12 | 51448473 | 5 | 2.277922 |
| SNP12-51471759 | KRT3      | 12 | 51471759 | 4 | 1.169033 |
| rs4432093      | KRT3      | 12 | 51472389 | 4 | 2.263016 |
| rs7956809      | KRT4      | 12 | 51488450 | 3 | 0.577898 |
| rs7959052      | KRT4      | 12 | 51492024 | 1 | 1.511598 |
| SNP12-51493895 | KRT4      | 12 | 51493895 | 3 | 1.281346 |
| SNP12-51493895 | KRT4      | 12 | 51493895 | 1 | 6.314938 |
| rs2070910      | KRT8      | 12 | 51585102 | 4 | 1.277264 |
| rs2070910      | KRT8      | 12 | 51585102 | 3 | 0.529131 |
| rs12816417     | TENC1     | 12 | 51743885 | 5 | 0.970224 |
| rs12816417     | TENC1     | 12 | 51743885 | 3 | 0.380288 |
| rs12816417     | TENC1     | 12 | 51743885 | 2 | 5.082938 |
| rs7398691      | MFSD5     | 12 | 51932152 | 7 | 0.176455 |
| rs6580942      | ESPL1     | 12 | 51948891 | 5 | 0.393281 |
| rs6580942      | ESPL1     | 12 | 51948891 | 8 | 5.274025 |
| rs6580942      | ESPL1     | 12 | 51948891 | 3 | 0.861473 |
| rs6580942      | ESPL1     | 12 | 51948891 | 4 | 0.228376 |
| rs6580942      | ESPL1     | 12 | 51948891 | 6 | 0.214367 |
| rs1318648      | ESPL1     | 12 | 51956812 | 6 | 0.314101 |
| rs1318648      | ESPL1     | 12 | 51956812 | 4 | 0.083262 |
| rs1318648      | ESPL1     | 12 | 51956812 | 5 | 0.204239 |
| rs1318648      | ESPL1     | 12 | 51956812 | 8 | 0.230862 |
| rs1318648      | ESPL1     | 12 | 51956812 | 2 | 5.079337 |
| SNP12-51987127 | C12orf10  | 12 | 51987127 | 7 | 3.90776  |
| SNP12-51987127 | C12orf10  | 12 | 51987127 | 3 | 3.489562 |
| SNP12-51987127 | C12orf10  | 12 | 51987127 | 8 | 2.191677 |
| SNP12-51987127 | C12orf10  | 12 | 51987127 | 2 | 5.935968 |
| SNP12-51987127 | C12orf10  | 12 | 51987127 | 5 | 2.867713 |
| SNP12-51987127 | C12orf10  | 12 | 51987127 | 4 | 2.710121 |
| SNP12-51987127 | C12orf10  | 12 | 51987127 | 1 | 3.868971 |
| rs12427129     | HOXC11    | 12 | 52653957 | 1 | 3.221024 |
| rs12427129     | HOXC11    | 12 | 52653957 | 6 | 0.82062  |
| rs2241820      | HOXC9     | 12 | 52680764 | 3 | 0.6688   |
| rs2241820      | HOXC9     | 12 | 52680764 | 4 | 1.221783 |
| rs2241820      | HOXC9     | 12 | 52680764 | 1 | 1.048648 |
| rs2241820      | HOXC9     | 12 | 52680764 | 7 | 0.541319 |
| rs4016778      | HOXC5     | 12 | 52714638 | 8 | 2.563285 |
| rs4016778      | HOXC5     | 12 | 52714638 | 3 | 0.348481 |

|            |           |    |          |   |          |
|------------|-----------|----|----------|---|----------|
| rs2071450  | HOXC5     | 12 | 52714799 | 7 | 0.411844 |
| rs2071450  | HOXC5     | 12 | 52714799 | 2 | 1.397559 |
| rs2071450  | HOXC5     | 12 | 52714799 | 1 | 0.779615 |
| GA010838   | HOXC4     | 12 | 52735926 | 8 | 5.170058 |
| GA010838   | HOXC4     | 12 | 52735926 | 3 | 0.401789 |
| rs1140681  | CBX5      | 12 | 52937738 | 1 | 4.015302 |
| rs1140681  | CBX5      | 12 | 52937738 | 7 | 0.84702  |
| rs1140681  | CBX5      | 12 | 52937738 | 4 | 1.393999 |
| rs1140681  | CBX5      | 12 | 52937738 | 8 | 1.364421 |
| rs884510   | PDE1B     | 12 | 53258566 | 2 | 2.177276 |
| rs884510   | PDE1B     | 12 | 53258566 | 8 | 3.727477 |
| rs884510   | PDE1B     | 12 | 53258566 | 7 | 2.421057 |
| rs884510   | PDE1B     | 12 | 53258566 | 1 | 3.716003 |
| rs1048371  | MUCL1     | 12 | 53534624 | 7 | 0.61337  |
| rs1048371  | MUCL1     | 12 | 53534624 | 2 | 2.221673 |
| rs1048371  | MUCL1     | 12 | 53534624 | 4 | 1.908392 |
| rs1048371  | MUCL1     | 12 | 53534624 | 1 | 1.945757 |
| rs1801876  | KIAA0748  | 12 | 53630291 | 2 | 1.054577 |
| rs1801876  | KIAA0748  | 12 | 53630291 | 3 | 1.241972 |
| rs1801876  | KIAA0748  | 12 | 53630291 | 1 | 1.983521 |
| rs7301705  | OR6C74    | 12 | 53927342 | 1 | 1.403827 |
| rs7132076  | LOC653441 | 12 | 54094736 | 4 | 6.249505 |
| rs7132076  | LOC653441 | 12 | 54094736 | 2 | 5.065926 |
| rs7304753  | OR6C68    | 12 | 54172756 | 6 | 0.145374 |
| rs10876838 | OR10P1    | 12 | 54317205 | 3 | 0.682153 |
| rs10876838 | OR10P1    | 12 | 54317205 | 7 | 1.726553 |
| rs10876838 | OR10P1    | 12 | 54317205 | 6 | 0.567885 |
| rs10876838 | OR10P1    | 12 | 54317205 | 1 | 0.645365 |
| rs7970885  | OR10P1    | 12 | 54317540 | 3 | 0.792214 |
| rs11171631 | OR10P1    | 12 | 54317878 | 5 | 3.932609 |
| rs17117883 | ITGA7     | 12 | 54368292 | 1 | 5.038906 |
| rs17117883 | ITGA7     | 12 | 54368292 | 3 | 0.682206 |
| rs17117883 | ITGA7     | 12 | 54368292 | 6 | 1.099517 |
| rs17117883 | ITGA7     | 12 | 54368292 | 7 | 3.938039 |
| rs1800974  | ITGA7     | 12 | 54375624 | 5 | 5.228092 |
| rs1800974  | ITGA7     | 12 | 54375624 | 3 | 0.982419 |
| rs1800974  | ITGA7     | 12 | 54375624 | 7 | 1.249434 |
| rs750667   | LOC440104 | 12 | 54514771 | 6 | 0.074077 |
| rs750667   | LOC440104 | 12 | 54514771 | 4 | 0.402225 |
| rs750667   | LOC440104 | 12 | 54514771 | 7 | 0.578631 |
| rs750667   | LOC440104 | 12 | 54514771 | 1 | 0.014543 |
| rs750667   | LOC440104 | 12 | 54514771 | 2 | 0.097836 |
| rs750667   | LOC440104 | 12 | 54514771 | 5 | 0.387902 |
| rs1136082  | DGKA      | 12 | 54621374 | 2 | 1.376897 |
| rs1136082  | DGKA      | 12 | 54621374 | 8 | 1.345397 |
| rs1052165  | SILV      | 12 | 54637613 | 2 | 3.853297 |
| rs1052165  | SILV      | 12 | 54637613 | 3 | 0.572078 |



|                |           |    |          |   |          |
|----------------|-----------|----|----------|---|----------|
| rs1052165      | SILV      | 12 | 54637613 | 8 | 1.330695 |
| rs1131017      | RPS26     | 12 | 54722196 | 1 | 4.086179 |
| rs1131017      | RPS26     | 12 | 54722196 | 5 | 0.240827 |
| rs1131017      | RPS26     | 12 | 54722196 | 6 | 0.407324 |
| SNP12-54773468 | ERBB3     | 12 | 54773468 | 1 | 3.805029 |
| rs2271192      | FAM62A    | 12 | 54817421 | 4 | 0.992499 |
| rs2271192      | FAM62A    | 12 | 54817421 | 1 | 2.855327 |
| rs17118409     | SLC39A5   | 12 | 54917031 | 3 | 0.115316 |
| rs11171806     | IL23A     | 12 | 55019798 | 3 | 0.514673 |
| rs2066807      | STAT2     | 12 | 55026949 | 3 | 1.245702 |
| rs2291739      | TIMELESS  | 12 | 55100920 | 7 | 3.481946 |
| rs2291739      | TIMELESS  | 12 | 55100920 | 6 | 0.656272 |
| rs2291739      | TIMELESS  | 12 | 55100920 | 5 | 0.337168 |
| rs2291739      | TIMELESS  | 12 | 55100920 | 4 | 2.722976 |
| rs774027       | TIMELESS  | 12 | 55108645 | 4 | 3.856829 |
| rs774027       | TIMELESS  | 12 | 55108645 | 7 | 1.426926 |
| rs774027       | TIMELESS  | 12 | 55108645 | 5 | 0.704792 |
| rs774027       | TIMELESS  | 12 | 55108645 | 2 | 5.396734 |
| rs774027       | TIMELESS  | 12 | 55108645 | 6 | 7.806148 |
| rs2371455      | MIP       | 12 | 55130160 | 3 | 0.739263 |
| rs2371455      | MIP       | 12 | 55130160 | 4 | 2.872543 |
| rs3809125      | MIP       | 12 | 55130616 | 4 | 1.047242 |
| rs3809125      | MIP       | 12 | 55130616 | 3 | 1.276376 |
| rs3809125      | MIP       | 12 | 55130616 | 2 | 2.605582 |
| rs2657880      | SPRYD4    | 12 | 55150037 | 3 | 0.074779 |
| rs2638315      | GLS2      | 12 | 55151323 | 3 | 0.719342 |
| rs2638315      | GLS2      | 12 | 55151323 | 6 | 0.280742 |
| rs2638315      | GLS2      | 12 | 55151323 | 7 | 1.038606 |
| GA010905       | NACA      | 12 | 55394470 | 3 | 0.659421 |
| GA010905       | NACA      | 12 | 55394470 | 5 | 1.13743  |
| GA010905       | NACA      | 12 | 55394470 | 6 | 6.539768 |
| GA010905       | NACA      | 12 | 55394470 | 7 | 0.240576 |
| rs2279743      | LOC390332 | 12 | 55663776 | 1 | 1.625867 |
| rs2279743      | LOC390332 | 12 | 55663776 | 8 | 0.935662 |
| rs3741578      | ZBTB39    | 12 | 55680902 | 6 | 0.809699 |
| rs3741578      | ZBTB39    | 12 | 55680902 | 1 | 6.752812 |
| rs748894       | ZBTB39    | 12 | 55684561 | 8 | 0.625378 |
| rs12814239     | LRP1      | 12 | 55855745 | 8 | 5.391882 |
| SNP12-55910968 | SHMT2     | 12 | 55910968 | 6 | 1.001808 |
| rs3204635      | STAC3     | 12 | 55923860 | 1 | 0.467547 |
| rs3204635      | STAC3     | 12 | 55923860 | 5 | 0.371212 |
| rs4075325      | R3HDM2    | 12 | 55936107 | 1 | 0.331562 |
| rs4075325      | R3HDM2    | 12 | 55936107 | 5 | 0.078304 |
| rs4075325      | R3HDM2    | 12 | 55936107 | 2 | 3.297802 |
| rs4075325      | R3HDM2    | 12 | 55936107 | 8 | 4.601325 |
| rs4075325      | R3HDM2    | 12 | 55936107 | 4 | 2.51267  |
| rs2228225      | GLI1      | 12 | 56145698 | 5 | 0.065921 |

|            |           |    |          |   |          |
|------------|-----------|----|----------|---|----------|
| rs2228225  | GLI1      | 12 | 56145698 | 1 | 0.690054 |
| rs2228225  | GLI1      | 12 | 56145698 | 2 | 1.143109 |
| rs2228225  | GLI1      | 12 | 56145698 | 3 | 0.612701 |
| rs2228225  | GLI1      | 12 | 56145698 | 8 | 0.746206 |
| rs2228225  | GLI1      | 12 | 56145698 | 4 | 0.031144 |
| rs2228226  | GLI1      | 12 | 56152088 | 3 | 1.161924 |
| rs2228226  | GLI1      | 12 | 56152088 | 1 | 1.079742 |
| rs2228226  | GLI1      | 12 | 56152088 | 5 | 0.400665 |
| rs2228226  | GLI1      | 12 | 56152088 | 8 | 0.358375 |
| rs11544238 | ARHGAP9   | 12 | 56156422 | 3 | 0.038312 |
| rs11544238 | ARHGAP9   | 12 | 56156422 | 8 | 0.690948 |
| rs11544238 | ARHGAP9   | 12 | 56156422 | 1 | 0.522391 |
| rs11544238 | ARHGAP9   | 12 | 56156422 | 7 | 1.100917 |
| rs34160414 | ARHGAP9   | 12 | 56157704 | 7 | 1.62262  |
| rs2277319  | PIP4K2C   | 12 | 56280946 | 1 | 5.192119 |
| rs923828   | SLC26A10  | 12 | 56301761 | 6 | 2.226824 |
| rs923828   | SLC26A10  | 12 | 56301761 | 1 | 2.118718 |
| rs774898   | B4GALNT1  | 12 | 56313053 | 5 | 2.874983 |
| rs799265   | OS9       | 12 | 56398456 | 1 | 3.153944 |
| rs799265   | OS9       | 12 | 56398456 | 4 | 0.293715 |
| rs799265   | OS9       | 12 | 56398456 | 3 | 0.678308 |
| GA029106   | CENTG1    | 12 | 56412501 | 3 | 0.298461 |
| GA029106   | CENTG1    | 12 | 56412501 | 6 | 5.081379 |
| GA029106   | CENTG1    | 12 | 56412501 | 4 | 1.17153  |
| rs2291617  | FAM119B   | 12 | 56452670 | 5 | 1.212705 |
| rs923829   | FAM119B   | 12 | 56460573 | 4 | 1.061796 |
| rs923829   | FAM119B   | 12 | 56460573 | 3 | 0.238869 |
| rs923829   | FAM119B   | 12 | 56460573 | 5 | 1.020108 |
| rs3751325  | XRCC6BP1  | 12 | 56621893 | 5 | 0.77486  |
| rs3751325  | XRCC6BP1  | 12 | 56621893 | 1 | 6.180772 |
| rs3751325  | XRCC6BP1  | 12 | 56621893 | 4 | 2.783959 |
| rs3751325  | XRCC6BP1  | 12 | 56621893 | 3 | 0.364287 |
| rs11172796 | LRIG3     | 12 | 57565927 | 5 | 5.868339 |
| rs11172796 | LRIG3     | 12 | 57565927 | 1 | 6.903915 |
| rs11172796 | LRIG3     | 12 | 57565927 | 3 | 0.694044 |
| rs4432061  | SLC16A7   | 12 | 58460155 | 4 | 1.807845 |
| rs4432061  | SLC16A7   | 12 | 58460155 | 1 | 6.353131 |
| rs10877783 | LOC645000 | 12 | 60706430 | 1 | 1.377977 |
| rs2044846  | USP15     | 12 | 61064332 | 4 | 7.111801 |
| rs2044846  | USP15     | 12 | 61064332 | 3 | 0.598596 |
| rs2044846  | USP15     | 12 | 61064332 | 5 | 1.227071 |
| rs2044846  | USP15     | 12 | 61064332 | 8 | 7.375789 |
| rs2044846  | USP15     | 12 | 61064332 | 6 | 4.49891  |
| rs11174557 | MON2      | 12 | 61265483 | 6 | 0.794178 |
| rs11174557 | MON2      | 12 | 61265483 | 1 | 3.765646 |
| rs10877885 | C12orf61  | 12 | 61282251 | 4 | 5.280571 |
| rs10877901 | PPM1H     | 12 | 61324905 | 7 | 6.794378 |

|                |             |    |          |   |          |
|----------------|-------------|----|----------|---|----------|
| rs1532394      | PPM1H       | 12 | 61325946 | 5 | 0.236639 |
| rs1532394      | PPM1H       | 12 | 61325946 | 8 | 5.107744 |
| rs17098126     | PPM1H       | 12 | 61326530 | 2 | 6.085851 |
| rs772580       | PPM1H       | 12 | 61614824 | 7 | 0.748389 |
| rs772580       | PPM1H       | 12 | 61614824 | 3 | 0.111539 |
| rs12426017     | hCG_1820764 | 12 | 61682539 | 4 | 3.359567 |
| rs12426017     | hCG_1820764 | 12 | 61682539 | 1 | 3.56669  |
| rs1042615      | AVPR1A      | 12 | 61830476 | 4 | 0.579758 |
| rs1042615      | AVPR1A      | 12 | 61830476 | 3 | 1.331288 |
| rs1042615      | AVPR1A      | 12 | 61830476 | 7 | 0.166926 |
| rs1042615      | AVPR1A      | 12 | 61830476 | 5 | 0.311487 |
| rs10878073     | DPY19L2     | 12 | 62348290 | 6 | 1.561344 |
| rs10878073     | DPY19L2     | 12 | 62348290 | 7 | 1.051954 |
| SNP12-62771420 | SRGAP1      | 12 | 62771420 | 1 | 4.313215 |
| rs1002392      | C12orf56    | 12 | 62955357 | 1 | 0.148375 |
| rs11609829     | LOC729435   | 12 | 63018561 | 3 | 1.07761  |
| rs11609829     | LOC729435   | 12 | 63018561 | 2 | 0.912352 |
| rs11609829     | LOC729435   | 12 | 63018561 | 8 | 1.123053 |
| rs11609829     | LOC729435   | 12 | 63018561 | 4 | 0.557415 |
| SNP12-63033100 | C12orf56    | 12 | 63033100 | 6 | 1.291018 |
| rs7486100      | TBK1        | 12 | 63162054 | 4 | 0.167996 |
| rs7486100      | TBK1        | 12 | 63162054 | 6 | 0.851332 |
| rs7486100      | TBK1        | 12 | 63162054 | 5 | 0.384545 |
| rs1061743      | GNS         | 12 | 63394427 | 8 | 0.340645 |
| rs17764513     | KIAA0984    | 12 | 63556483 | 5 | 0.157931 |
| rs7311657      | KIAA0984    | 12 | 63556703 | 5 | 0.586074 |
| rs7311657      | KIAA0984    | 12 | 63556703 | 7 | 0.617821 |
| rs7311657      | KIAA0984    | 12 | 63556703 | 8 | 0.171953 |
| rs3741742      | KIAA0984    | 12 | 63559303 | 5 | 0.022501 |
| rs3741742      | KIAA0984    | 12 | 63559303 | 7 | 0.292226 |
| rs3741742      | KIAA0984    | 12 | 63559303 | 8 | 0.092636 |
| rs7316024      | MSRB3       | 12 | 64143822 | 2 | 0.915541 |
| rs7316024      | MSRB3       | 12 | 64143822 | 7 | 0.543992 |
| rs7316024      | MSRB3       | 12 | 64143822 | 1 | 0.171256 |
| rs7316024      | MSRB3       | 12 | 64143822 | 4 | 0.073772 |
| SNP12-64644388 | HMGA2       | 12 | 64644388 | 3 | 0.802877 |
| rs1152888      | IRAK3       | 12 | 64891495 | 1 | 3.449309 |
| rs3741604      | HELB        | 12 | 64982677 | 4 | 0.164208 |
| rs3741604      | HELB        | 12 | 64982677 | 5 | 0.328282 |
| rs17224845     | MDM1        | 12 | 67006602 | 4 | 4.695107 |
| rs2287477      | LOC729376   | 12 | 67112000 | 5 | 0.318637 |
| rs2259588      | NUP107      | 12 | 67369072 | 6 | 0.289421 |
| rs7971479      | CPM         | 12 | 67533750 | 7 | 0.026387 |
| rs7971479      | CPM         | 12 | 67533750 | 3 | 0.067046 |
| rs7971479      | CPM         | 12 | 67533750 | 1 | 3.400357 |
| rs9817         | CPM         | 12 | 67534215 | 3 | 0.276254 |
| rs9817         | CPM         | 12 | 67534215 | 1 | 3.107582 |

|                |           |    |          |   |          |
|----------------|-----------|----|----------|---|----------|
| rs9817         | CPM       | 12 | 67534215 | 7 | 0.71328  |
| rs10082893     | CPM       | 12 | 67551845 | 7 | 0.287312 |
| rs10082893     | CPM       | 12 | 67551845 | 1 | 3.233964 |
| rs12184493     | CPSF6     | 12 | 67950119 | 1 | 4.985015 |
| rs3177122      | CCT2      | 12 | 68281614 | 3 | 0.31128  |
| rs28203        | LRRRC10   | 12 | 68289706 | 1 | 0.884105 |
| rs17225440     | BEST3     | 12 | 68334286 | 6 | 0.552244 |
| rs17225440     | BEST3     | 12 | 68334286 | 1 | 1.753412 |
| rs17225440     | BEST3     | 12 | 68334286 | 8 | 0.485653 |
| rs17225440     | BEST3     | 12 | 68334286 | 3 | 1.163479 |
| rs17225440     | BEST3     | 12 | 68334286 | 5 | 0.464964 |
| rs775419       | BEST3     | 12 | 68369170 | 5 | 0.656511 |
| rs775419       | BEST3     | 12 | 68369170 | 1 | 1.357021 |
| rs775419       | BEST3     | 12 | 68369170 | 2 | 0.616005 |
| rs11177879     | RAB3IP    | 12 | 68497094 | 1 | 0.109915 |
| rs11177879     | RAB3IP    | 12 | 68497094 | 8 | 0.94212  |
| rs11177879     | RAB3IP    | 12 | 68497094 | 2 | 3.008127 |
| rs11177879     | RAB3IP    | 12 | 68497094 | 4 | 0.048169 |
| rs11177879     | RAB3IP    | 12 | 68497094 | 5 | 0.876407 |
| rs1882194      | RAB3IP    | 12 | 68501353 | 4 | 0.431013 |
| rs1466711      | RAB3IP    | 12 | 68502227 | 7 | 0.422406 |
| rs1466711      | RAB3IP    | 12 | 68502227 | 3 | 0.408813 |
| rs1466711      | RAB3IP    | 12 | 68502227 | 5 | 4.770273 |
| rs1466711      | RAB3IP    | 12 | 68502227 | 4 | 0.73358  |
| rs1466711      | RAB3IP    | 12 | 68502227 | 6 | 5.347136 |
| rs3752703      | PTPRB     | 12 | 69214883 | 7 | 0.496364 |
| rs3752703      | PTPRB     | 12 | 69214883 | 4 | 0.200884 |
| rs3752703      | PTPRB     | 12 | 69214883 | 3 | 0.891101 |
| rs3752703      | PTPRB     | 12 | 69214883 | 5 | 1.165583 |
| rs1051344      | TSPAN8    | 12 | 69805363 | 3 | 1.235428 |
| rs1051344      | TSPAN8    | 12 | 69805363 | 5 | 0.813615 |
| rs1051344      | TSPAN8    | 12 | 69805363 | 4 | 1.200942 |
| rs1051344      | TSPAN8    | 12 | 69805363 | 1 | 1.864723 |
| rs3763978      | TSPAN8    | 12 | 69819801 | 1 | 2.199362 |
| rs3763978      | TSPAN8    | 12 | 69819801 | 5 | 0.031233 |
| rs3763978      | TSPAN8    | 12 | 69819801 | 3 | 0.987005 |
| SNP12-69824218 | TSPAN8    | 12 | 69824218 | 2 | 3.333999 |
| rs3741688      | RAB21     | 12 | 70450662 | 1 | 5.547964 |
| rs11609372     | TBC1D15   | 12 | 70604075 | 1 | 5.371749 |
| rs17110747     | TPH2      | 12 | 70712221 | 5 | 1.474019 |
| rs11180483     | GLIPR1L2  | 12 | 74071367 | 3 | 1.868843 |
| rs11180483     | GLIPR1L2  | 12 | 74071367 | 7 | 2.353752 |
| rs11180483     | GLIPR1L2  | 12 | 74071367 | 5 | 2.132334 |
| rs11180483     | GLIPR1L2  | 12 | 74071367 | 4 | 2.461626 |
| rs17042412     | LOC441642 | 12 | 75518380 | 5 | 0.053729 |
| rs1587110      | LOC727777 | 12 | 75797341 | 1 | 0.959082 |
| rs1587110      | LOC727777 | 12 | 75797341 | 7 | 0.846595 |

|                |           |    |          |   |          |
|----------------|-----------|----|----------|---|----------|
| rs1587110      | LOC727777 | 12 | 75797341 | 6 | 0.747352 |
| rs7958377      | E2F7      | 12 | 75940098 | 2 | 3.445538 |
| rs7958377      | E2F7      | 12 | 75940098 | 1 | 0.060213 |
| rs310831       | E2F7      | 12 | 75943472 | 1 | 0.312641 |
| rs310831       | E2F7      | 12 | 75943472 | 2 | 6.83695  |
| rs366527       | NAV3      | 12 | 77066830 | 6 | 0.310546 |
| rs9971904      | NAV3      | 12 | 77123022 | 7 | 0.595203 |
| rs3803039      | NAV3      | 12 | 77129759 | 4 | 3.30489  |
| rs10778677     | LOC338756 | 12 | 78464026 | 3 | 5.22211  |
| rs10778679     | LOC338756 | 12 | 78476708 | 3 | 0.342245 |
| rs10862089     | NULL      | 12 | 79223606 | 5 | 0.156764 |
| rs10862089     | NULL      | 12 | 79223606 | 7 | 0.001432 |
| rs1551118      | C12orf64  | 12 | 79285561 | 6 | 5.722969 |
| rs1551118      | C12orf64  | 12 | 79285561 | 8 | 0.738733 |
| rs1551122      | C12orf64  | 12 | 79289931 | 6 | 1.438544 |
| rs1551122      | C12orf64  | 12 | 79289931 | 5 | 0.108734 |
| rs1551122      | C12orf64  | 12 | 79289931 | 4 | 0.418195 |
| rs2717477      | C12orf64  | 12 | 79295944 | 6 | 1.091733 |
| rs1153046      | PTPRQ     | 12 | 79598034 | 5 | 2.147363 |
| rs1153046      | PTPRQ     | 12 | 79598034 | 1 | 2.713224 |
| rs1153046      | PTPRQ     | 12 | 79598034 | 3 | 1.136069 |
| rs3121         | MYF6      | 12 | 79627052 | 1 | 0.459845 |
| rs1047185      | MYF6      | 12 | 79627275 | 2 | 6.579528 |
| rs11114581     | MYF5      | 12 | 79637013 | 3 | 5.014896 |
| rs17552524     | TMTC2     | 12 | 82050990 | 5 | 0.04208  |
| rs17183577     | SLC6A15   | 12 | 83801692 | 8 | 0.26549  |
| rs3765044      | LRR1Q1    | 12 | 83962630 | 2 | 3.296232 |
| rs3765044      | LRR1Q1    | 12 | 83962630 | 5 | 0.500847 |
| rs3765044      | LRR1Q1    | 12 | 83962630 | 4 | 2.914958 |
| rs3765044      | LRR1Q1    | 12 | 83962630 | 3 | 0.178139 |
| rs7974418      | LRR1Q1    | 12 | 83973596 | 5 | 0.274988 |
| rs7974418      | LRR1Q1    | 12 | 83973596 | 6 | 0.181187 |
| rs7974418      | LRR1Q1    | 12 | 83973596 | 4 | 1.344749 |
| rs7974418      | LRR1Q1    | 12 | 83973596 | 8 | 0.035934 |
| rs7974418      | LRR1Q1    | 12 | 83973596 | 1 | 3.453042 |
| SNP12-83990854 | LRR1Q1    | 12 | 83990854 | 2 | 2.048128 |
| SNP12-83990854 | LRR1Q1    | 12 | 83990854 | 3 | 0.802956 |
| SNP12-84039650 | LRR1Q1    | 12 | 84039650 | 5 | 0.159964 |
| rs7397266      | PAMCI     | 12 | 84723066 | 1 | 0.129926 |
| rs7397266      | PAMCI     | 12 | 84723066 | 2 | 1.032165 |
| rs1907699      | KITLG     | 12 | 87414108 | 4 | 0.762345 |
| rs1907699      | KITLG     | 12 | 87414108 | 8 | 5.999954 |
| rs7973791      | KERA      | 12 | 89968856 | 4 | 1.876391 |
| rs12694        | BTG1      | 12 | 91063721 | 3 | 0.641824 |
| rs12694        | BTG1      | 12 | 91063721 | 6 | 1.100048 |
| rs12694        | BTG1      | 12 | 91063721 | 2 | 3.24804  |
| rs12580153     | CLLU1     | 12 | 91342613 | 1 | 1.220835 |

|                |           |    |          |   |          |
|----------------|-----------|----|----------|---|----------|
| rs7303412      | CLLU1     | 12 | 91347241 | 5 | 0.381222 |
| rs7303412      | CLLU1     | 12 | 91347241 | 6 | 1.259483 |
| rs7303412      | CLLU1     | 12 | 91347241 | 4 | 1.133668 |
| rs6538329      | CLLU1     | 12 | 91348724 | 4 | 2.998798 |
| rs6538329      | CLLU1     | 12 | 91348724 | 5 | 0.306142 |
| rs6538329      | CLLU1     | 12 | 91348724 | 6 | 0.30601  |
| rs7308198      | CLLU1     | 12 | 91348829 | 3 | 0.865472 |
| rs7308198      | CLLU1     | 12 | 91348829 | 4 | 1.314567 |
| rs7308198      | CLLU1     | 12 | 91348829 | 6 | 0.300343 |
| rs7308198      | CLLU1     | 12 | 91348829 | 5 | 0.370478 |
| rs7308198      | CLLU1     | 12 | 91348829 | 2 | 2.738691 |
| rs2036553      | PLEKHG7   | 12 | 91655334 | 3 | 0.139555 |
| rs2036553      | PLEKHG7   | 12 | 91655334 | 1 | 1.773193 |
| SNP12-91674233 | PLEKHG7   | 12 | 91674233 | 1 | 0.199334 |
| SNP12-91674233 | PLEKHG7   | 12 | 91674233 | 3 | 0.125517 |
| rs17790340     | PLEKHG7   | 12 | 91689023 | 5 | 7.357733 |
| rs10507017     | PLEKHG7   | 12 | 91689067 | 5 | 0.283816 |
| rs17194402     | PLEKHG7   | 12 | 91689750 | 5 | 1.259017 |
| rs17194451     | EEA1      | 12 | 91782796 | 6 | 6.422246 |
| rs17194451     | EEA1      | 12 | 91782796 | 3 | 0.643731 |
| rs17194451     | EEA1      | 12 | 91782796 | 2 | 3.259201 |
| rs1498708      | SOCS2     | 12 | 92488095 | 6 | 0.529506 |
| rs1498708      | SOCS2     | 12 | 92488095 | 1 | 3.363524 |
| rs1498708      | SOCS2     | 12 | 92488095 | 7 | 0.965371 |
| SNP12-93353232 | CCDC41    | 12 | 93353232 | 1 | 5.865001 |
| rs7139313      | LOC283398 | 12 | 93466354 | 1 | 3.777523 |
| rs7139313      | LOC283398 | 12 | 93466354 | 5 | 4.175623 |
| rs7139313      | LOC283398 | 12 | 93466354 | 3 | 3.301719 |
| rs7139313      | LOC283398 | 12 | 93466354 | 6 | 4.039619 |
| rs7139313      | LOC283398 | 12 | 93466354 | 2 | 3.696616 |
| rs7139313      | LOC283398 | 12 | 93466354 | 8 | 3.464715 |
| rs10859724     | LOC283398 | 12 | 93467678 | 8 | 5.994382 |
| rs10859724     | LOC283398 | 12 | 93467678 | 4 | 0.168022 |
| rs10859724     | LOC283398 | 12 | 93467678 | 5 | 3.253375 |
| rs10859724     | LOC283398 | 12 | 93467678 | 1 | 5.588622 |
| rs10859725     | LOC283398 | 12 | 93468003 | 4 | 0.053423 |
| rs10859725     | LOC283398 | 12 | 93468003 | 1 | 0.183795 |
| rs10859725     | LOC283398 | 12 | 93468003 | 5 | 0.585868 |
| rs17022649     | LOC283398 | 12 | 93468108 | 6 | 0.823155 |
| rs17022649     | LOC283398 | 12 | 93468108 | 3 | 0.263482 |
| rs4761630      | LOC283398 | 12 | 93468312 | 5 | 1.293184 |
| rs4761630      | LOC283398 | 12 | 93468312 | 1 | 2.337434 |
| rs1290004      | TMCC3     | 12 | 93486922 | 1 | 5.108474 |
| rs1290004      | TMCC3     | 12 | 93486922 | 3 | 1.068449 |
| rs1290005      | TMCC3     | 12 | 93488288 | 7 | 2.915353 |
| rs1290005      | TMCC3     | 12 | 93488288 | 6 | 2.564744 |
| rs1290005      | TMCC3     | 12 | 93488288 | 5 | 1.362342 |

|                |           |    |          |   |          |
|----------------|-----------|----|----------|---|----------|
| rs1290005      | TMCC3     | 12 | 93488288 | 4 | 3.466549 |
| rs1290005      | TMCC3     | 12 | 93488288 | 1 | 5.506721 |
| rs1290005      | TMCC3     | 12 | 93488288 | 8 | 4.870172 |
| rs11107606     | TMCC3     | 12 | 93488496 | 3 | 2.34371  |
| rs11107606     | TMCC3     | 12 | 93488496 | 8 | 1.072799 |
| rs11107606     | TMCC3     | 12 | 93488496 | 1 | 2.848378 |
| rs11107606     | TMCC3     | 12 | 93488496 | 6 | 1.453956 |
| rs11107606     | TMCC3     | 12 | 93488496 | 7 | 0.519823 |
| rs1290910      | TMCC3     | 12 | 93489189 | 6 | 1.190121 |
| rs1290910      | TMCC3     | 12 | 93489189 | 5 | 0.691901 |
| rs1290910      | TMCC3     | 12 | 93489189 | 1 | 5.627155 |
| rs1290910      | TMCC3     | 12 | 93489189 | 8 | 0.547336 |
| rs1290910      | TMCC3     | 12 | 93489189 | 4 | 2.947986 |
| rs2270893      | TMCC3     | 12 | 93496421 | 4 | 1.114258 |
| rs2270893      | TMCC3     | 12 | 93496421 | 7 | 0.175975 |
| rs2270893      | TMCC3     | 12 | 93496421 | 3 | 0.4955   |
| rs2306884      | FGD6      | 12 | 94126803 | 3 | 2.210901 |
| rs2306884      | FGD6      | 12 | 94126803 | 2 | 4.3997   |
| rs17023760     | FGD6      | 12 | 94127229 | 7 | 0.119399 |
| rs6538617      | FGD6      | 12 | 94135272 | 8 | 2.677023 |
| rs6538617      | FGD6      | 12 | 94135272 | 1 | 2.888999 |
| rs6538617      | FGD6      | 12 | 94135272 | 7 | 0.27016  |
| rs6538617      | FGD6      | 12 | 94135272 | 5 | 0.172587 |
| rs3812814      | USP44     | 12 | 94451168 | 6 | 1.226621 |
| rs3812813      | USP44     | 12 | 94451893 | 5 | 3.913902 |
| rs3812813      | USP44     | 12 | 94451893 | 3 | 0.607454 |
| rs17024783     | SNRPF     | 12 | 94776964 | 1 | 0.05844  |
| rs7960706      | CCDC38    | 12 | 94785078 | 6 | 0.45589  |
| rs7960706      | CCDC38    | 12 | 94785078 | 4 | 3.936638 |
| rs2117914      | CCDC38    | 12 | 94790166 | 4 | 1.100287 |
| rs2117914      | CCDC38    | 12 | 94790166 | 5 | 0.1391   |
| rs2230885      | HAL       | 12 | 94892031 | 3 | 0.805405 |
| rs2230885      | HAL       | 12 | 94892031 | 1 | 4.218284 |
| rs2230885      | HAL       | 12 | 94892031 | 4 | 0.427977 |
| rs2160501      | C12orf55  | 12 | 95452103 | 1 | 2.418177 |
| rs2160501      | C12orf55  | 12 | 95452103 | 2 | 1.973425 |
| rs2160502      | C12orf55  | 12 | 95452117 | 2 | 0.368204 |
| rs2160502      | C12orf55  | 12 | 95452117 | 4 | 0.507086 |
| rs2160502      | C12orf55  | 12 | 95452117 | 1 | 0.22407  |
| SNP12-95569612 | C12orf63  | 12 | 95569612 | 7 | 1.721384 |
| rs7978894      | C12orf63  | 12 | 95660349 | 8 | 1.970084 |
| rs7978894      | C12orf63  | 12 | 95660349 | 1 | 2.364734 |
| rs829863       | LOC121456 | 12 | 97372827 | 1 | 0.843861 |
| rs829863       | LOC121456 | 12 | 97372827 | 3 | 0.826971 |
| rs17028572     | IKIP      | 12 | 97543761 | 4 | 3.833976 |
| SNP12-98164290 | ANKS1B    | 12 | 98164290 | 6 | 0.223601 |
| SNP12-98164290 | ANKS1B    | 12 | 98164290 | 4 | 0.103851 |

|                |           |    |           |   |          |
|----------------|-----------|----|-----------|---|----------|
| SNP12-98164290 | ANKS1B    | 12 | 98164290  | 1 | 0.043714 |
| rs3751323      | ANKS1B    | 12 | 98164559  | 1 | 4.354478 |
| rs3751323      | ANKS1B    | 12 | 98164559  | 4 | 2.988887 |
| rs3751323      | ANKS1B    | 12 | 98164559  | 6 | 0.363148 |
| rs1552759      | ANKS1B    | 12 | 98164688  | 3 | 0.012769 |
| rs1552759      | ANKS1B    | 12 | 98164688  | 4 | 0.809799 |
| rs1552759      | ANKS1B    | 12 | 98164688  | 1 | 3.490188 |
| rs1552759      | ANKS1B    | 12 | 98164688  | 6 | 0.007935 |
| rs11109969     | FAM71C    | 12 | 98566294  | 4 | 1.312905 |
| rs11613157     | FAM71C    | 12 | 98567776  | 4 | 0.89413  |
| SNP12-99006997 | UHRF1BP1L | 12 | 99006997  | 6 | 0.527422 |
| rs7307415      | DEPDC4    | 12 | 99181595  | 8 | 9.132805 |
| rs7307415      | DEPDC4    | 12 | 99181595  | 5 | 0.269799 |
| rs33968174     | SCYL2     | 12 | 99232498  | 4 | 0.290868 |
| SNP12-99542192 | GAS2L3    | 12 | 99542192  | 7 | 0.759619 |
| rs1045603      | GAS2L3    | 12 | 99542292  | 7 | 0.858185 |
| rs1842887      | LOC728467 | 12 | 99986949  | 2 | 3.186545 |
| rs1842887      | LOC728467 | 12 | 99986949  | 6 | 0.964683 |
| rs1842887      | LOC728467 | 12 | 99986949  | 8 | 3.003609 |
| rs1842887      | LOC728467 | 12 | 99986949  | 1 | 3.894566 |
| rs1849710      | TMEM16D   | 12 | 100046209 | 8 | 4.512396 |
| rs1849710      | TMEM16D   | 12 | 100046209 | 6 | 0.23761  |
| rs2671444      | SLC5A8    | 12 | 100076206 | 7 | 0.48087  |
| rs2671444      | SLC5A8    | 12 | 100076206 | 1 | 1.927431 |
| rs9634221      | SLC5A8    | 12 | 100086071 | 5 | 1.051628 |
| rs4764643      | UTP20     | 12 | 100217665 | 7 | 0.963433 |
| rs4764643      | UTP20     | 12 | 100217665 | 8 | 0.671153 |
| rs4764643      | UTP20     | 12 | 100217665 | 3 | 0.129199 |
| rs3817552      | MYBPC1    | 12 | 100569294 | 8 | 7.971531 |
| rs3817552      | MYBPC1    | 12 | 100569294 | 6 | 1.893638 |
| rs3817552      | MYBPC1    | 12 | 100569294 | 1 | 5.330707 |
| rs731682       | ASCL1     | 12 | 101876779 | 5 | 0.678812 |
| rs10778257     | C12orf42  | 12 | 102396302 | 7 | 0.286709 |
| rs697212       | STAB2     | 12 | 102624747 | 7 | 2.037893 |
| rs2292688      | STAB2     | 12 | 102660446 | 7 | 1.394535 |
| rs2292688      | STAB2     | 12 | 102660446 | 1 | 5.370501 |
| rs11616136     | NT5DC3    | 12 | 102690225 | 1 | 5.280768 |
| rs11616136     | NT5DC3    | 12 | 102690225 | 4 | 3.516036 |
| rs4964830      | NT5DC3    | 12 | 102693038 | 1 | 3.899156 |
| rs6539101      | NT5DC3    | 12 | 102693112 | 3 | 0.217927 |
| rs6539101      | NT5DC3    | 12 | 102693112 | 4 | 0.271845 |
| rs11111761     | NT5DC3    | 12 | 102693958 | 7 | 0.956574 |
| rs11111761     | NT5DC3    | 12 | 102693958 | 4 | 2.185749 |
| rs11111764     | NT5DC3    | 12 | 102694481 | 7 | 0.702137 |
| rs10861097     | NT5DC3    | 12 | 102694604 | 7 | 0.694495 |
| rs10861097     | NT5DC3    | 12 | 102694604 | 1 | 4.650759 |
| rs3751205      | NT5DC3    | 12 | 102695401 | 7 | 6.550654 |



|                |           |    |           |   |          |
|----------------|-----------|----|-----------|---|----------|
| rs3751205      | NT5DC3    | 12 | 102695401 | 4 | 6.335227 |
| rs1370780      | LOC253724 | 12 | 102761959 | 3 | 1.283426 |
| rs10778292     | LOC253724 | 12 | 102784417 | 7 | 0.330473 |
| rs10778292     | LOC253724 | 12 | 102784417 | 3 | 1.420001 |
| rs10745988     | LOC253724 | 12 | 102807336 | 1 | 0.110275 |
| rs10745988     | LOC253724 | 12 | 102807336 | 3 | 0.129543 |
| rs7298655      | LOC253724 | 12 | 102811086 | 3 | 1.315151 |
| rs7298655      | LOC253724 | 12 | 102811086 | 6 | 0.0549   |
| rs7298655      | LOC253724 | 12 | 102811086 | 1 | 0.702147 |
| rs2583235      | LOC253724 | 12 | 102811245 | 7 | 0.570627 |
| rs9788136      | LOC253724 | 12 | 102829287 | 1 | 3.891221 |
| rs7645         | HSP90B1   | 12 | 102865233 | 3 | 0.821628 |
| rs7645         | HSP90B1   | 12 | 102865233 | 8 | 0.964227 |
| rs7645         | HSP90B1   | 12 | 102865233 | 5 | 0.446384 |
| rs7645         | HSP90B1   | 12 | 102865233 | 7 | 0.308556 |
| rs17035132     | GLT8D2    | 12 | 102937566 | 1 | 2.179745 |
| rs11111979     | TXNRD1    | 12 | 103204912 | 1 | 4.720717 |
| rs11111979     | TXNRD1    | 12 | 103204912 | 7 | 0.457776 |
| rs11111979     | TXNRD1    | 12 | 103204912 | 6 | 0.09461  |
| rs11111979     | TXNRD1    | 12 | 103204912 | 5 | 0.615694 |
| rs11111979     | TXNRD1    | 12 | 103204912 | 4 | 0.882392 |
| rs4964287      | TXNRD1    | 12 | 103233689 | 4 | 7.578656 |
| rs4964287      | TXNRD1    | 12 | 103233689 | 5 | 0.272023 |
| rs4964287      | TXNRD1    | 12 | 103233689 | 6 | 0.363883 |
| rs4964287      | TXNRD1    | 12 | 103233689 | 7 | 0.276289 |
| rs4964287      | TXNRD1    | 12 | 103233689 | 8 | 0.650775 |
| rs11611385     | TXNRD1    | 12 | 103266440 | 7 | 0.303479 |
| rs11611385     | TXNRD1    | 12 | 103266440 | 4 | 0.238592 |
| rs34775780     | APPL2     | 12 | 104113252 | 8 | 0.48861  |
| rs6539247      | NUAK1     | 12 | 104984032 | 5 | 5.531903 |
| rs6539247      | NUAK1     | 12 | 104984032 | 8 | 5.815425 |
| rs6539247      | NUAK1     | 12 | 104984032 | 3 | 0.640961 |
| rs3741883      | NUAK1     | 12 | 104985068 | 6 | 5.146896 |
| rs3741883      | NUAK1     | 12 | 104985068 | 2 | 4.259902 |
| rs3853777      | LOC341378 | 12 | 105090304 | 1 | 0.097705 |
| rs11831752     | TCP11L2   | 12 | 105220716 | 4 | 1.115939 |
| rs11831752     | TCP11L2   | 12 | 105220716 | 6 | 0.391972 |
| rs2252929      | TCP11L2   | 12 | 105264670 | 4 | 0.661783 |
| rs2252929      | TCP11L2   | 12 | 105264670 | 2 | 0.340847 |
| rs2252929      | TCP11L2   | 12 | 105264670 | 1 | 0.049254 |
| rs2252929      | TCP11L2   | 12 | 105264670 | 3 | 0.098659 |
| SNP12-10567924 | RFX4      | 12 | 105679247 | 5 | 0.39882  |
| rs1055332      | LOC728705 | 12 | 105872755 | 7 | 0.238703 |
| rs1043156      | MTERFD3   | 12 | 105896407 | 1 | 4.586616 |
| rs1043156      | MTERFD3   | 12 | 105896407 | 3 | 0.380396 |
| rs2287162      | MTERFD3   | 12 | 105905035 | 1 | 4.299421 |
| rs2287162      | MTERFD3   | 12 | 105905035 | 6 | 4.034196 |

|                |           |    |           |   |          |
|----------------|-----------|----|-----------|---|----------|
| rs2287162      | MTERFD3   | 12 | 105905035 | 4 | 0.042347 |
| rs2287162      | MTERFD3   | 12 | 105905035 | 3 | 0.324181 |
| rs3809235      | CRY1      | 12 | 106011199 | 8 | 2.652236 |
| rs3809235      | CRY1      | 12 | 106011199 | 3 | 0.332924 |
| rs12303478     | BTBD11    | 12 | 106575536 | 1 | 2.534088 |
| rs12303478     | BTBD11    | 12 | 106575536 | 3 | 0.017142 |
| rs11893        | BTBD11    | 12 | 106577349 | 3 | 0.163162 |
| rs11893        | BTBD11    | 12 | 106577349 | 1 | 2.036196 |
| rs11113472     | ASCL4     | 12 | 106692715 | 3 | 1.256531 |
| rs10861834     | LOC728739 | 12 | 106821041 | 5 | 0.630256 |
| rs10861834     | LOC728739 | 12 | 106821041 | 1 | 0.247741 |
| rs10861834     | LOC728739 | 12 | 106821041 | 3 | 0.158933 |
| rs12579216     | SART3     | 12 | 107465809 | 2 | 2.738259 |
| rs7980427      | DAO       | 12 | 107805439 | 2 | 0.378065 |
| rs10778660     | SVOP      | 12 | 107829650 | 5 | 1.481959 |
| rs11065772     | ACACB     | 12 | 108102248 | 3 | 0.293215 |
| rs2300455      | ACACB     | 12 | 108107899 | 7 | 1.686092 |
| rs2300455      | ACACB     | 12 | 108107899 | 8 | 1.56843  |
| rs2300455      | ACACB     | 12 | 108107899 | 4 | 0.910224 |
| SNP12-10817643 | ACACB     | 12 | 108176436 | 4 | 0.355918 |
| SNP12-10817643 | ACACB     | 12 | 108176436 | 1 | 5.090928 |
| SNP12-10817643 | ACACB     | 12 | 108176436 | 5 | 0.158358 |
| rs2075263      | ACACB     | 12 | 108188708 | 4 | 0.812141 |
| rs2075438      | FOXN4     | 12 | 108201593 | 3 | 0.148121 |
| rs10774641     | FOXN4     | 12 | 108202080 | 3 | 1.041035 |
| rs7295954      | KCTD10    | 12 | 108372975 | 7 | 4.611768 |
| rs877710       | MMAB      | 12 | 108478359 | 2 | 3.741123 |
| rs877710       | MMAB      | 12 | 108478359 | 4 | 0.886509 |
| rs877710       | MMAB      | 12 | 108478359 | 7 | 0.649511 |
| rs877710       | MMAB      | 12 | 108478359 | 8 | 8.559825 |
| rs11067233     | MMAB      | 12 | 108478591 | 2 | 5.365279 |
| rs9593         | MMAB      | 12 | 108479253 | 8 | 4.963033 |
| rs9593         | MMAB      | 12 | 108479253 | 2 | 1.684024 |
| rs9593         | MMAB      | 12 | 108479253 | 7 | 8.155943 |
| rs9593         | MMAB      | 12 | 108479253 | 4 | 6.906627 |
| rs10774775     | MMAB      | 12 | 108495613 | 7 | 0.945817 |
| rs10774775     | MMAB      | 12 | 108495613 | 2 | 2.290234 |
| rs3742037      | TRPV4     | 12 | 108710762 | 3 | 0.322588 |
| rs3742030      | TRPV4     | 12 | 108736930 | 1 | 3.585735 |
| rs17680262     | TCHP      | 12 | 108838919 | 6 | 6.54992  |
| rs7314498      | GIT2      | 12 | 108854524 | 7 | 2.742796 |
| rs7314498      | GIT2      | 12 | 108854524 | 1 | 4.016156 |
| rs7314498      | GIT2      | 12 | 108854524 | 3 | 0.155209 |
| rs11068997     | GIT2      | 12 | 108867524 | 1 | 5.931691 |
| rs2287174      | ANKRD13A  | 12 | 108958453 | 1 | 2.499179 |
| rs34513555     | RAD9B     | 12 | 109444579 | 7 | 1.083454 |
| rs1973505      | PPP1CC    | 12 | 109644386 | 3 | 0.744658 |

|            |           |    |           |   |          |
|------------|-----------|----|-----------|---|----------|
| rs1973505  | PPP1CC    | 12 | 109644386 | 1 | 4.958706 |
| rs1973505  | PPP1CC    | 12 | 109644386 | 7 | 0.044109 |
| rs12303008 | CCDC63    | 12 | 109769214 | 7 | 1.066912 |
| rs2301610  | MYL2      | 12 | 109837939 | 3 | 1.521467 |
| rs2301610  | MYL2      | 12 | 109837939 | 7 | 1.432074 |
| rs3803167  | CUX2      | 12 | 110269969 | 1 | 0.610857 |
| rs3803167  | CUX2      | 12 | 110269969 | 3 | 0.613269 |
| rs7398833  | CUX2      | 12 | 110271275 | 3 | 0.276579 |
| rs7398833  | CUX2      | 12 | 110271275 | 6 | 0.95841  |
| rs7398833  | CUX2      | 12 | 110271275 | 1 | 3.393652 |
| rs7398833  | CUX2      | 12 | 110271275 | 4 | 0.534213 |
| rs10849938 | FAM109A   | 12 | 110284442 | 3 | 0.521435 |
| rs10849938 | FAM109A   | 12 | 110284442 | 1 | 3.006722 |
| rs10849938 | FAM109A   | 12 | 110284442 | 6 | 0.978717 |
| rs3184504  | SH2B3     | 12 | 110368991 | 8 | 4.213616 |
| rs3184504  | SH2B3     | 12 | 110368991 | 5 | 0.295541 |
| rs3184504  | SH2B3     | 12 | 110368991 | 2 | 1.841621 |
| rs3184504  | SH2B3     | 12 | 110368991 | 3 | 0.884697 |
| rs3184504  | SH2B3     | 12 | 110368991 | 6 | 0.14749  |
| rs3184504  | SH2B3     | 12 | 110368991 | 4 | 0.1658   |
| rs3184504  | SH2B3     | 12 | 110368991 | 1 | 0.132883 |
| rs695871   | ATXN2     | 12 | 110521383 | 1 | 1.258181 |
| rs695871   | ATXN2     | 12 | 110521383 | 4 | 1.507627 |
| rs34245489 | ACAD10    | 12 | 110670657 | 8 | 0.314999 |
| rs3177647  | C12orf47  | 12 | 110761959 | 1 | 3.772458 |
| rs3177647  | C12orf47  | 12 | 110761959 | 4 | 0.096927 |
| rs7135514  | LOC728543 | 12 | 110932868 | 8 | 4.213221 |
| rs7135514  | LOC728543 | 12 | 110932868 | 5 | 0.323799 |
| rs7295294  | C12orf30  | 12 | 110949276 | 1 | 3.977106 |
| rs3519     | NULL      | 12 | 111082704 | 1 | 4.054058 |
| rs1005902  | NULL      | 12 | 111152058 | 5 | 0.548823 |
| rs1005902  | NULL      | 12 | 111152058 | 4 | 6.649547 |
| rs1005902  | NULL      | 12 | 111152058 | 1 | 2.722488 |
| rs1005902  | NULL      | 12 | 111152058 | 6 | 1.036764 |
| rs1005902  | NULL      | 12 | 111152058 | 8 | 6.995534 |
| rs2240194  | RPH3A     | 12 | 111803983 | 4 | 1.830455 |
| rs4141253  | RPH3A     | 12 | 111810012 | 3 | 0.190522 |
| rs2285933  | OAS3      | 12 | 111871162 | 5 | 0.219677 |
| rs2285933  | OAS3      | 12 | 111871162 | 2 | 4.700678 |
| rs2240188  | OAS3      | 12 | 111888067 | 2 | 3.344286 |
| rs2010549  | OAS3      | 12 | 111893380 | 1 | 6.947328 |
| rs2010549  | OAS3      | 12 | 111893380 | 3 | 0.114754 |
| rs2010549  | OAS3      | 12 | 111893380 | 5 | 0.314876 |
| rs2010549  | OAS3      | 12 | 111893380 | 7 | 0.316018 |
| rs7023     | OAS3      | 12 | 111895358 | 2 | 4.450263 |
| rs7023     | OAS3      | 12 | 111895358 | 5 | 0.587011 |
| rs2072138  | OAS2      | 12 | 111909276 | 2 | 4.38726  |

|                |        |    |           |   |          |
|----------------|--------|----|-----------|---|----------|
| rs2072138      | OAS2   | 12 | 111909276 | 5 | 0.167627 |
| rs1293767      | OAS2   | 12 | 111909537 | 7 | 0.621523 |
| rs1293767      | OAS2   | 12 | 111909537 | 8 | 1.193766 |
| rs1293767      | OAS2   | 12 | 111909537 | 3 | 0.153117 |
| rs1293766      | OAS2   | 12 | 111909665 | 7 | 0.592821 |
| rs1293766      | OAS2   | 12 | 111909665 | 3 | 1.098898 |
| rs1293766      | OAS2   | 12 | 111909665 | 1 | 3.144348 |
| rs1293766      | OAS2   | 12 | 111909665 | 5 | 0.653416 |
| rs1293765      | OAS2   | 12 | 111909876 | 3 | 0.815907 |
| rs1293765      | OAS2   | 12 | 111909876 | 7 | 0.545424 |
| rs1293765      | OAS2   | 12 | 111909876 | 8 | 0.316556 |
| rs1293765      | OAS2   | 12 | 111909876 | 4 | 0.375227 |
| rs12425514     | OAS2   | 12 | 111909920 | 5 | 1.603071 |
| rs12425514     | OAS2   | 12 | 111909920 | 2 | 6.362084 |
| rs1293764      | OAS2   | 12 | 111910062 | 8 | 0.217618 |
| rs1293764      | OAS2   | 12 | 111910062 | 4 | 0.438548 |
| rs1293764      | OAS2   | 12 | 111910062 | 7 | 0.316898 |
| rs1293764      | OAS2   | 12 | 111910062 | 3 | 0.762355 |
| rs1293755      | OAS2   | 12 | 111919833 | 1 | 4.471197 |
| rs1293755      | OAS2   | 12 | 111919833 | 4 | 2.282768 |
| rs1293755      | OAS2   | 12 | 111919833 | 3 | 0.507156 |
| rs1293755      | OAS2   | 12 | 111919833 | 7 | 0.447728 |
| rs1293755      | OAS2   | 12 | 111919833 | 8 | 0.693554 |
| rs1293743      | OAS2   | 12 | 111931955 | 2 | 0.961174 |
| rs1293743      | OAS2   | 12 | 111931955 | 6 | 4.888826 |
| rs1293743      | OAS2   | 12 | 111931955 | 7 | 3.918853 |
| rs1293743      | OAS2   | 12 | 111931955 | 1 | 0.764724 |
| rs1293743      | OAS2   | 12 | 111931955 | 4 | 4.746427 |
| rs1293743      | OAS2   | 12 | 111931955 | 3 | 0.890337 |
| rs13311        | OAS2   | 12 | 111933035 | 5 | 0.103399 |
| rs12427377     | DTX1   | 12 | 112017000 | 2 | 1.368976 |
| rs12427377     | DTX1   | 12 | 112017000 | 4 | 0.765261 |
| rs12426056     | DTX1   | 12 | 112017268 | 8 | 1.013482 |
| rs12423570     | RASAL1 | 12 | 112026481 | 2 | 2.09628  |
| rs12423570     | RASAL1 | 12 | 112026481 | 8 | 0.140265 |
| rs12423570     | RASAL1 | 12 | 112026481 | 4 | 0.898873 |
| rs34456143     | RASAL1 | 12 | 112039329 | 8 | 0.540309 |
| rs34456143     | RASAL1 | 12 | 112039329 | 4 | 5.399217 |
| rs34456143     | RASAL1 | 12 | 112039329 | 2 | 5.363894 |
| rs3812826      | SDS    | 12 | 112315040 | 2 | 2.623291 |
| rs2075387      | RBM19  | 12 | 112766879 | 7 | 0.217118 |
| SNP12-11285927 | RBM19  | 12 | 112859270 | 1 | 2.689878 |
| SNP12-11285927 | RBM19  | 12 | 112859270 | 6 | 4.895917 |
| SNP12-11285927 | RBM19  | 12 | 112859270 | 8 | 3.569518 |
| rs12321179     | RBM19  | 12 | 112868034 | 6 | 2.06547  |
| rs12321179     | RBM19  | 12 | 112868034 | 1 | 6.113993 |
| rs10850665     | KRTHB5 | 12 | 115481578 | 4 | 0.702975 |

|                |          |    |           |   |          |
|----------------|----------|----|-----------|---|----------|
| SNP12-11565999 | C12orf49 | 12 | 115659991 | 3 | 0.612341 |
| SNP12-11565999 | C12orf49 | 12 | 115659991 | 8 | 6.111263 |
| rs4767452      | TMEM118  | 12 | 115701524 | 7 | 0.49769  |
| rs903772       | TMEM118  | 12 | 115774984 | 2 | 3.417296 |
| rs903772       | TMEM118  | 12 | 115774984 | 7 | 0.452868 |
| rs4076700      | FBXW8    | 12 | 115867703 | 8 | 1.698012 |
| rs4076700      | FBXW8    | 12 | 115867703 | 2 | 4.471141 |
| rs4076700      | FBXW8    | 12 | 115867703 | 6 | 3.468673 |
| rs11068296     | FBXW8    | 12 | 115951755 | 6 | 0.998198 |
| rs11068296     | FBXW8    | 12 | 115951755 | 8 | 3.789843 |
| rs3741467      | FBXO21   | 12 | 116068449 | 3 | 0.187661 |
| rs7955803      | KSR2     | 12 | 116477447 | 1 | 4.753264 |
| rs7955803      | KSR2     | 12 | 116477447 | 5 | 0.233802 |
| rs7955803      | KSR2     | 12 | 116477447 | 8 | 0.243657 |
| rs7955803      | KSR2     | 12 | 116477447 | 6 | 1.860577 |
| rs617641       | KSR2     | 12 | 116683669 | 8 | 0.276334 |
| SNP12-11699357 | FLJ20674 | 12 | 116993574 | 7 | 1.000093 |
| SNP12-11699357 | FLJ20674 | 12 | 116993574 | 8 | 1.166099 |
| SNP12-11699357 | FLJ20674 | 12 | 116993574 | 3 | 0.794437 |
| SNP12-11699357 | FLJ20674 | 12 | 116993574 | 4 | 1.091871 |
| SNP12-11699357 | FLJ20674 | 12 | 116993574 | 5 | 0.54639  |
| rs428073       | TAOK3    | 12 | 117167134 | 6 | 1.206955 |
| rs10850968     | SUDS3    | 12 | 117339455 | 7 | 9.97401  |
| rs7305647      | SUDS3    | 12 | 117339949 | 5 | 0.717306 |
| rs7305647      | SUDS3    | 12 | 117339949 | 4 | 8.035619 |
| rs7305647      | SUDS3    | 12 | 117339949 | 3 | 1.198112 |
| rs1568923      | KIAA1853 | 12 | 117903986 | 5 | 1.151631 |
| rs1568924      | KIAA1853 | 12 | 117904015 | 5 | 1.60592  |
| rs1568924      | KIAA1853 | 12 | 117904015 | 3 | 1.102716 |
| rs1568924      | KIAA1853 | 12 | 117904015 | 4 | 0.932527 |
| SNP12-11805297 | KIAA1853 | 12 | 118052979 | 7 | 0.413588 |
| rs2555272      | KIAA1853 | 12 | 118079212 | 3 | 0.256648 |
| rs3809304      | KIAA1853 | 12 | 118080126 | 1 | 1.070724 |
| rs3809304      | KIAA1853 | 12 | 118080126 | 3 | 0.600326 |
| rs3809304      | KIAA1853 | 12 | 118080126 | 7 | 0.102482 |
| rs1064319      | CCDC60   | 12 | 118350916 | 1 | 2.702408 |
| rs1064319      | CCDC60   | 12 | 118350916 | 4 | 0.820928 |
| rs1064319      | CCDC60   | 12 | 118350916 | 3 | 0.013604 |
| rs784847       | CCDC60   | 12 | 118463203 | 5 | 1.073472 |
| rs278109       | CIT      | 12 | 118656378 | 1 | 4.633065 |
| rs278109       | CIT      | 12 | 118656378 | 5 | 0.024277 |
| rs17442937     | CIT      | 12 | 118755021 | 3 | 0.065877 |
| SNP12-11879833 | CIT      | 12 | 118798336 | 5 | 6.242741 |
| rs2286046      | GCN1L1   | 12 | 119073543 | 7 | 0.17878  |
| rs2286046      | GCN1L1   | 12 | 119073543 | 2 | 4.641958 |
| rs2286046      | GCN1L1   | 12 | 119073543 | 1 | 0.017344 |
| rs4767884      | PXN      | 12 | 119146360 | 1 | 0.205404 |

|                |          |    |           |   |          |
|----------------|----------|----|-----------|---|----------|
| rs4767884      | PXN      | 12 | 119146360 | 2 | 1.88456  |
| rs5637         | PLA2G1B  | 12 | 119247148 | 7 | 1.249835 |
| rs5637         | PLA2G1B  | 12 | 119247148 | 1 | 2.818838 |
| rs2522137      | MSI1     | 12 | 119264314 | 5 | 0.422043 |
| rs2522137      | MSI1     | 12 | 119264314 | 3 | 1.087327 |
| rs8903         | COX6A1   | 12 | 119362913 | 3 | 0.911731 |
| rs8903         | COX6A1   | 12 | 119362913 | 7 | 0.540667 |
| rs17431446     | GATC     | 12 | 119368674 | 1 | 4.514714 |
| rs11548264     | SFRS9    | 12 | 119391715 | 1 | 3.832216 |
| rs3088345      | RNF10    | 12 | 119499224 | 5 | 0.133581 |
| rs3088345      | RNF10    | 12 | 119499224 | 7 | 0.708801 |
| rs949443       | KIAA0152 | 12 | 119609374 | 1 | 0.338614 |
| rs949443       | KIAA0152 | 12 | 119609374 | 2 | 5.852875 |
| rs3914         | ACADS    | 12 | 119659282 | 7 | 0.357323 |
| rs3914         | ACADS    | 12 | 119659282 | 3 | 0.557584 |
| rs3914         | ACADS    | 12 | 119659282 | 5 | 0.131422 |
| rs1799958      | ACADS    | 12 | 119660466 | 3 | 0.12884  |
| rs1799958      | ACADS    | 12 | 119660466 | 7 | 0.204615 |
| rs3915         | ACADS    | 12 | 119661062 | 3 | 0.664697 |
| rs3915         | ACADS    | 12 | 119661062 | 5 | 2.925326 |
| rs3915         | ACADS    | 12 | 119661062 | 7 | 0.080177 |
| rs3916         | ACADS    | 12 | 119661655 | 1 | 0.015965 |
| rs3916         | ACADS    | 12 | 119661655 | 2 | 1.421261 |
| rs1169309      | HNF1A    | 12 | 119923575 | 5 | 0.320727 |
| rs1169309      | HNF1A    | 12 | 119923575 | 1 | 4.642653 |
| rs1169309      | HNF1A    | 12 | 119923575 | 8 | 1.499689 |
| rs1169309      | HNF1A    | 12 | 119923575 | 7 | 0.279117 |
| rs1169310      | HNF1A    | 12 | 119923816 | 1 | 4.969739 |
| rs1169310      | HNF1A    | 12 | 119923816 | 8 | 0.536798 |
| rs1169310      | HNF1A    | 12 | 119923816 | 7 | 0.413373 |
| rs1169310      | HNF1A    | 12 | 119923816 | 5 | 5.518805 |
| SNP12-11992464 | HNF1A    | 12 | 119924646 | 4 | 0.507024 |
| rs2258227      | C12orf43 | 12 | 119938640 | 3 | 0.670185 |
| rs2258227      | C12orf43 | 12 | 119938640 | 1 | 4.988211 |
| rs2258227      | C12orf43 | 12 | 119938640 | 4 | 0.016423 |
| rs2258227      | C12orf43 | 12 | 119938640 | 5 | 0.39404  |
| rs17525809     | P2RX7    | 12 | 120077072 | 3 | 2.7987   |
| rs17525809     | P2RX7    | 12 | 120077072 | 7 | 2.266616 |
| rs7958311      | P2RX7    | 12 | 120089738 | 5 | 1.585387 |
| rs1718119      | P2RX7    | 12 | 120099486 | 5 | 0.218837 |
| rs1718119      | P2RX7    | 12 | 120099486 | 1 | 0.031973 |
| rs1063843      | CAMKK2   | 12 | 120166070 | 3 | 0.428768 |
| rs3817190      | CAMKK2   | 12 | 120196460 | 7 | 6.531827 |
| SNP12-12024046 | ANAPC5   | 12 | 120240467 | 2 | 2.186881 |
| rs3751131      | FBXL10   | 12 | 120364903 | 5 | 0.163297 |
| rs3751131      | FBXL10   | 12 | 120364903 | 3 | 0.480135 |
| rs3751131      | FBXL10   | 12 | 120364903 | 4 | 0.621145 |

|                |          |    |           |   |          |
|----------------|----------|----|-----------|---|----------|
| rs3741595      | ORAI1    | 12 | 120563572 | 3 | 0.184495 |
| rs3741595      | ORAI1    | 12 | 120563572 | 1 | 2.615955 |
| rs1154510      | HPD      | 12 | 120779718 | 4 | 1.322446 |
| rs2230681      | PSMD9    | 12 | 120811195 | 8 | 8.093091 |
| SNP12-12083923 | PSMD9    | 12 | 120839231 | 8 | 4.880174 |
| SNP12-12083923 | PSMD9    | 12 | 120839231 | 3 | 0.70568  |
| SNP12-12083923 | PSMD9    | 12 | 120839231 | 7 | 0.677491 |
| SNP12-12083923 | PSMD9    | 12 | 120839231 | 5 | 0.667522 |
| rs11043265     | WDR66    | 12 | 120876421 | 3 | 0.781991 |
| SNP12-12088077 | WDR66    | 12 | 120880778 | 7 | 3.184591 |
| SNP12-12088077 | WDR66    | 12 | 120880778 | 8 | 7.050903 |
| SNP12-12088077 | WDR66    | 12 | 120880778 | 5 | 2.644845 |
| SNP12-12088077 | WDR66    | 12 | 120880778 | 3 | 1.050864 |
| SNP12-12088077 | WDR66    | 12 | 120880778 | 2 | 5.283085 |
| SNP12-12089757 | WDR66    | 12 | 120897579 | 3 | 0.450589 |
| rs11060094     | LRRC43   | 12 | 121240733 | 2 | 1.147271 |
| rs11060094     | LRRC43   | 12 | 121240733 | 1 | 0.696197 |
| rs1129167      | CLIP1    | 12 | 121378456 | 2 | 1.408061 |
| rs1129167      | CLIP1    | 12 | 121378456 | 7 | 0.582952 |
| SNP12-12138353 | CLIP1    | 12 | 121383533 | 6 | 0.858479 |
| SNP12-12138353 | CLIP1    | 12 | 121383533 | 5 | 0.893486 |
| SNP12-12162374 | KNTC1    | 12 | 121623745 | 3 | 0.184479 |
| rs2270775      | KNTC1    | 12 | 121671096 | 6 | 0.095029 |
| rs2270775      | KNTC1    | 12 | 121671096 | 7 | 1.486883 |
| rs676404       | GPR109A  | 12 | 121753258 | 8 | 7.667925 |
| rs676404       | GPR109A  | 12 | 121753258 | 7 | 0.018    |
| rs676404       | GPR109A  | 12 | 121753258 | 5 | 1.379067 |
| rs676404       | GPR109A  | 12 | 121753258 | 4 | 0.466853 |
| rs676404       | GPR109A  | 12 | 121753258 | 6 | 0.645075 |
| rs676404       | GPR109A  | 12 | 121753258 | 2 | 1.319429 |
| rs676404       | GPR109A  | 12 | 121753258 | 1 | 0.690829 |
| rs676404       | GPR109A  | 12 | 121753258 | 3 | 2.04348  |
| rs7131791      | GPR81    | 12 | 121778693 | 4 | 1.688654 |
| rs7131791      | GPR81    | 12 | 121778693 | 3 | 1.883154 |
| rs7131791      | GPR81    | 12 | 121778693 | 1 | 2.698823 |
| rs2280424      | C12orf65 | 12 | 122304447 | 5 | 0.089151 |
| rs6633         | CDK2AP1  | 12 | 122311762 | 3 | 0.665387 |
| rs6633         | CDK2AP1  | 12 | 122311762 | 8 | 4.754585 |
| rs6633         | CDK2AP1  | 12 | 122311762 | 1 | 1.665059 |
| rs3825141      | SBNO1    | 12 | 122360057 | 5 | 6.764383 |
| rs6488868      | SBNO1    | 12 | 122365927 | 5 | 4.051943 |
| rs6488868      | SBNO1    | 12 | 122365927 | 3 | 1.249183 |
| rs12322888     | SBNO1    | 12 | 122391512 | 3 | 0.121216 |
| rs28434767     | RILPL2   | 12 | 122487217 | 6 | 0.4736   |
| rs28434767     | RILPL2   | 12 | 122487217 | 1 | 5.339504 |
| rs28434767     | RILPL2   | 12 | 122487217 | 5 | 0.291649 |
| rs28434767     | RILPL2   | 12 | 122487217 | 8 | 0.131525 |

|                |          |    |           |   |          |
|----------------|----------|----|-----------|---|----------|
| rs10846532     | EIF2B1   | 12 | 122671525 | 8 | 0.511457 |
| rs7966867      | TCTN2    | 12 | 122745370 | 7 | 0.053312 |
| rs7966867      | TCTN2    | 12 | 122745370 | 6 | 0.960175 |
| rs7966867      | TCTN2    | 12 | 122745370 | 1 | 5.139486 |
| rs11830658     | ATP6V0A2 | 12 | 122775285 | 1 | 1.348553 |
| SNP12-12280851 | ATP6V0A2 | 12 | 122808510 | 6 | 0.190698 |
| SNP12-12283164 | DNAH10   | 12 | 122831640 | 7 | 0.542482 |
| SNP12-12283164 | DNAH10   | 12 | 122831640 | 2 | 2.148592 |
| rs11057355     | DNAH10   | 12 | 122833656 | 6 | 0.851002 |
| rs11057355     | DNAH10   | 12 | 122833656 | 2 | 0.054368 |
| rs11057355     | DNAH10   | 12 | 122833656 | 4 | 0.565128 |
| rs11057355     | DNAH10   | 12 | 122833656 | 8 | 1.000131 |
| rs11057355     | DNAH10   | 12 | 122833656 | 7 | 0.128775 |
| rs11057401     | CCDC92   | 12 | 122993259 | 2 | 1.476016 |
| rs11057401     | CCDC92   | 12 | 122993259 | 5 | 0.532573 |
| rs12318072     | FAM101A  | 12 | 123364754 | 8 | 2.854468 |
| rs904647       | FAM101A  | 12 | 123365340 | 8 | 3.43635  |
| rs904647       | FAM101A  | 12 | 123365340 | 3 | 1.913058 |
| rs904647       | FAM101A  | 12 | 123365340 | 5 | 3.15655  |
| rs904647       | FAM101A  | 12 | 123365340 | 4 | 2.33914  |
| rs10846654     | FAM101A  | 12 | 123365411 | 6 | 2.106074 |
| rs10846654     | FAM101A  | 12 | 123365411 | 5 | 2.464911 |
| rs10846654     | FAM101A  | 12 | 123365411 | 8 | 5.299276 |
| rs10846654     | FAM101A  | 12 | 123365411 | 3 | 2.325651 |
| rs4765540      | FAM101A  | 12 | 123365595 | 3 | 0.030183 |
| rs4765540      | FAM101A  | 12 | 123365595 | 6 | 1.381212 |
| rs4765540      | FAM101A  | 12 | 123365595 | 8 | 3.636371 |
| rs12551        | FAM101A  | 12 | 123366271 | 8 | 4.879814 |
| SNP12-12338736 | NCOR2    | 12 | 123387369 | 5 | 5.511125 |
| rs2229840      | NCOR2    | 12 | 123392415 | 4 | 0.198605 |
| rs2229840      | NCOR2    | 12 | 123392415 | 8 | 1.005112 |
| rs41276688     | UBC      | 12 | 123965086 | 7 | 0.034493 |
| rs13624        | UBC      | 12 | 123965120 | 7 | 0.308094 |
| rs12427062     | DHX37    | 12 | 124033111 | 1 | 1.919353 |
| rs12427062     | DHX37    | 12 | 124033111 | 5 | 0.133645 |
| rs1491893      | TMEM132B | 12 | 124400048 | 7 | 0.180888 |
| rs1491893      | TMEM132B | 12 | 124400048 | 8 | 0.615442 |
| rs1491893      | TMEM132B | 12 | 124400048 | 6 | 0.4699   |
| SNP12-12457008 | TMEM132B | 12 | 124570083 | 7 | 4.741684 |
| SNP12-12457008 | TMEM132B | 12 | 124570083 | 3 | 4.225696 |
| SNP12-12457008 | TMEM132B | 12 | 124570083 | 2 | 3.622654 |
| SNP12-12457008 | TMEM132B | 12 | 124570083 | 5 | 3.072467 |
| SNP12-12457008 | TMEM132B | 12 | 124570083 | 8 | 3.749694 |
| SNP12-12457008 | TMEM132B | 12 | 124570083 | 1 | 4.388525 |
| SNP12-12457008 | TMEM132B | 12 | 124570083 | 6 | 3.892424 |
| SNP12-12457008 | TMEM132B | 12 | 124570083 | 4 | 3.253617 |
| rs2240496      | TMEM132B | 12 | 124705478 | 2 | 2.085311 |



|                |           |    |           |   |          |
|----------------|-----------|----|-----------|---|----------|
| rs740328       | TMEM132B  | 12 | 124708795 | 5 | 3.350084 |
| rs740330       | TMEM132B  | 12 | 124708897 | 5 | 0.981582 |
| rs1043607      | TMEM132B  | 12 | 124709299 | 8 | 1.028949 |
| rs2302271      | LOC728173 | 12 | 125484541 | 4 | 2.680704 |
| rs4760085      | FZD10     | 12 | 129215496 | 4 | 1.830107 |
| rs1046893      | FZD10     | 12 | 129215969 | 6 | 1.214045 |
| rs1046895      | FZD10     | 12 | 129215994 | 6 | 2.934234 |
| rs1046895      | FZD10     | 12 | 129215994 | 7 | 1.866394 |
| rs28416520     | LOC728983 | 12 | 129389610 | 4 | 0.504231 |
| rs28416520     | LOC728983 | 12 | 129389610 | 5 | 0.665472 |
| rs28416520     | LOC728983 | 12 | 129389610 | 2 | 2.289907 |
| rs10848087     | PIWIL1    | 12 | 129405118 | 5 | 0.804375 |
| rs2277361      | RIMBP2    | 12 | 129507103 | 5 | 1.176169 |
| rs2277361      | RIMBP2    | 12 | 129507103 | 4 | 0.014232 |
| rs1236         | STX2      | 12 | 129840347 | 3 | 0.557924 |
| rs1236         | STX2      | 12 | 129840347 | 2 | 2.36133  |
| rs1236         | STX2      | 12 | 129840347 | 8 | 0.286418 |
| rs1236         | STX2      | 12 | 129840347 | 6 | 5.318069 |
| rs34515698     | MMP17     | 12 | 130891329 | 3 | 0.99925  |
| rs34515698     | MMP17     | 12 | 130891329 | 4 | 0.094372 |
| rs11835665     | MMP17     | 12 | 130901545 | 6 | 7.422127 |
| SNP12-13096751 | ULK1      | 12 | 130967519 | 6 | 2.315645 |
| SNP12-13096751 | ULK1      | 12 | 130967519 | 3 | 0.904806 |
| SNP12-13096751 | ULK1      | 12 | 130967519 | 5 | 0.078084 |
| rs12313437     | EP400     | 12 | 131128364 | 2 | 5.646249 |
| rs12309945     | EP400     | 12 | 131129207 | 2 | 4.755502 |
| rs7484529      | EP400     | 12 | 131129324 | 2 | 3.932737 |
| rs1133690      | DDX51     | 12 | 131192621 | 3 | 0.987517 |
| rs12308155     | GALNT9    | 12 | 131248434 | 4 | 1.943315 |
| rs12308155     | GALNT9    | 12 | 131248434 | 3 | 1.261712 |
| rs12308155     | GALNT9    | 12 | 131248434 | 1 | 0.030557 |
| rs11246991     | GALNT9    | 12 | 131254068 | 2 | 6.046157 |
| rs7486927      | GALNT9    | 12 | 131254090 | 1 | 1.019501 |
| rs7964634      | P2RX2     | 12 | 131706669 | 7 | 0.431621 |
| rs7973007      | P2RX2     | 12 | 131708982 | 3 | 0.515527 |
| rs5744944      | POLE      | 12 | 131729904 | 7 | 0.323643 |
| SNP12-13173059 | POLE      | 12 | 131730599 | 5 | 0.2041   |
| SNP12-13178254 | PXMP2     | 12 | 131782543 | 3 | 0.511309 |
| SNP12-13178254 | PXMP2     | 12 | 131782543 | 2 | 5.14026  |
| SNP12-13178254 | PXMP2     | 12 | 131782543 | 8 | 5.252012 |
| rs7979132      | PXMP2     | 12 | 131791549 | 3 | 0.24277  |
| rs7979132      | PXMP2     | 12 | 131791549 | 2 | 4.697402 |
| rs7979132      | PXMP2     | 12 | 131791549 | 8 | 0.299519 |
| SNP12-13181678 | KIAA0692  | 12 | 131816783 | 2 | 3.264306 |
| rs7134809      | GOLGA3    | 12 | 131900071 | 3 | 0.853071 |
| rs7134809      | GOLGA3    | 12 | 131900071 | 1 | 2.083352 |
| rs7134809      | GOLGA3    | 12 | 131900071 | 4 | 0.486401 |

|                |               |    |           |   |          |
|----------------|---------------|----|-----------|---|----------|
| rs7134809      | GOLGA3        | 12 | 131900071 | 2 | 0.657768 |
| rs2291256      | GOLGA3        | 12 | 131903396 | 1 | 4.734256 |
| rs2291256      | GOLGA3        | 12 | 131903396 | 7 | 3.357774 |
| rs3741490      | CHFR          | 12 | 131927981 | 7 | 0.07917  |
| rs3741490      | CHFR          | 12 | 131927981 | 2 | 4.965315 |
| rs3741490      | CHFR          | 12 | 131927981 | 5 | 0.576268 |
| rs2306537      | CHFR          | 12 | 131933768 | 2 | 4.604096 |
| rs2306537      | CHFR          | 12 | 131933768 | 4 | 5.75673  |
| rs2306537      | CHFR          | 12 | 131933768 | 8 | 1.019417 |
| rs2306537      | CHFR          | 12 | 131933768 | 3 | 0.96965  |
| rs2306537      | CHFR          | 12 | 131933768 | 7 | 0.998981 |
| rs9888336      | ZNF26         | 12 | 132073327 | 3 | 0.983232 |
| rs9888336      | ZNF26         | 12 | 132073327 | 6 | 0.223018 |
| SNP12-13212806 | ZNF84         | 12 | 132128064 | 7 | 5.843286 |
| rs7961682      | ZNF84         | 12 | 132128095 | 7 | 0.402723 |
| rs601679       | ZNF84         | 12 | 132145686 | 3 | 6.741029 |
| SNP12-13219309 | ZNF140        | 12 | 132193093 | 6 | 0.411368 |
| rs905225       | ZNF140        | 12 | 132193353 | 5 | 0.309212 |
| rs905225       | ZNF140        | 12 | 132193353 | 8 | 7.092015 |
| rs905225       | ZNF140        | 12 | 132193353 | 6 | 0.932129 |
| rs905225       | ZNF140        | 12 | 132193353 | 3 | 0.179743 |
| rs905225       | ZNF140        | 12 | 132193353 | 4 | 4.526696 |
| rs2292029      | ZNF10         | 12 | 132244186 | 7 | 0.637617 |
| rs2292029      | ZNF10         | 12 | 132244186 | 8 | 5.84896  |
| rs2292029      | ZNF10         | 12 | 132244186 | 5 | 0.026068 |
| rs2292029      | ZNF10         | 12 | 132244186 | 1 | 4.40364  |
| SNP12-13227862 | ZNF268        | 12 | 132278626 | 7 | 5.072872 |
| SNP12-13227862 | ZNF268        | 12 | 132278626 | 1 | 3.922742 |
| SNP12-13227862 | ZNF268        | 12 | 132278626 | 5 | 0.44851  |
| SNP12-13227862 | ZNF268        | 12 | 132278626 | 8 | 5.543869 |
| rs9553323      | DKFZp686A1627 | 13 | 18523340  | 6 | 5.536339 |
| rs9553323      | DKFZp686A1627 | 13 | 18523340  | 5 | 5.323467 |
| rs9553323      | DKFZp686A1627 | 13 | 18523340  | 4 | 3.506903 |
| rs9553323      | DKFZp686A1627 | 13 | 18523340  | 3 | 5.068422 |
| rs9553323      | DKFZp686A1627 | 13 | 18523340  | 2 | 4.634592 |
| rs9553323      | DKFZp686A1627 | 13 | 18523340  | 1 | 6.43239  |
| rs4608194      | DKFZp686A1627 | 13 | 18524818  | 5 | 4.990272 |
| rs4608194      | DKFZp686A1627 | 13 | 18524818  | 2 | 3.691737 |
| rs4608194      | DKFZp686A1627 | 13 | 18524818  | 4 | 1.933938 |
| rs4608194      | DKFZp686A1627 | 13 | 18524818  | 8 | 2.194771 |
| rs9512066      | LOC642395     | 13 | 18680646  | 1 | 4.826775 |
| rs9512066      | LOC642395     | 13 | 18680646  | 5 | 4.961741 |
| rs9512066      | LOC642395     | 13 | 18680646  | 3 | 3.884557 |
| rs4112696      | LOC645771     | 13 | 18841770  | 3 | 0.554692 |
| rs4112696      | LOC645771     | 13 | 18841770  | 7 | 0.68567  |
| rs4112696      | LOC645771     | 13 | 18841770  | 1 | 0.762008 |
| rs1057093      | MPHOSPH8      | 13 | 19118659  | 5 | 2.993817 |

|                |           |    |          |   |          |
|----------------|-----------|----|----------|---|----------|
| rs1057093      | MPHOSPH8  | 13 | 19118659 | 2 | 5.241718 |
| rs1057093      | MPHOSPH8  | 13 | 19118659 | 1 | 4.054203 |
| rs9578176      | MPHOSPH8  | 13 | 19122387 | 1 | 0.645186 |
| rs9578176      | MPHOSPH8  | 13 | 19122387 | 2 | 0.759861 |
| rs9578176      | MPHOSPH8  | 13 | 19122387 | 4 | 1.062932 |
| rs9508887      | PSPC1     | 13 | 19254941 | 7 | 1.227115 |
| rs9508887      | PSPC1     | 13 | 19254941 | 1 | 0.360693 |
| rs9508887      | PSPC1     | 13 | 19254941 | 2 | 0.19613  |
| rs9508887      | PSPC1     | 13 | 19254941 | 4 | 6.652818 |
| rs7988277      | ZMYM5     | 13 | 19309701 | 2 | 0.807068 |
| rs7988277      | ZMYM5     | 13 | 19309701 | 1 | 0.5893   |
| rs7988277      | ZMYM5     | 13 | 19309701 | 7 | 0.467254 |
| rs7988277      | ZMYM5     | 13 | 19309701 | 4 | 1.113031 |
| SNP13-19323948 | ZMYM5     | 13 | 19323948 | 4 | 6.760339 |
| SNP13-19323948 | ZMYM5     | 13 | 19323948 | 1 | 0.084237 |
| SNP13-19323948 | ZMYM5     | 13 | 19323948 | 7 | 1.84488  |
| SNP13-19323948 | ZMYM5     | 13 | 19323948 | 2 | 6.032827 |
| rs10161995     | LOC400099 | 13 | 19336935 | 7 | 2.637592 |
| rs10161995     | LOC400099 | 13 | 19336935 | 1 | 0.036671 |
| rs10161995     | LOC400099 | 13 | 19336935 | 4 | 6.948872 |
| rs9509372      | XPO4      | 13 | 20253927 | 2 | 5.022347 |
| SNP13-20460832 | LATS2     | 13 | 20460832 | 8 | 6.203898 |
| SNP13-20460948 | LATS2     | 13 | 20460948 | 3 | 0.21053  |
| rs3742221      | SAP18     | 13 | 20618956 | 1 | 4.19675  |
| rs1046530      | SAP18     | 13 | 20620190 | 1 | 3.506828 |
| rs9316143      | C13orf3   | 13 | 20626012 | 4 | 0.037515 |
| rs9316143      | C13orf3   | 13 | 20626012 | 5 | 6.534063 |
| rs3087726      | C13orf3   | 13 | 20626088 | 4 | 0.823393 |
| rs3087726      | C13orf3   | 13 | 20626088 | 5 | 0.104152 |
| rs11147977     | C13orf3   | 13 | 20627267 | 4 | 3.856906 |
| rs11147977     | C13orf3   | 13 | 20627267 | 6 | 2.292968 |
| rs17345690     | C13orf3   | 13 | 20633998 | 4 | 0.9978   |
| rs17345690     | C13orf3   | 13 | 20633998 | 5 | 0.746587 |
| SNP13-20640311 | C13orf3   | 13 | 20640311 | 8 | 5.281552 |
| SNP13-20640311 | C13orf3   | 13 | 20640311 | 6 | 2.449756 |
| SNP13-20640311 | C13orf3   | 13 | 20640311 | 4 | 5.237402 |
| rs4638420      | LOC650794 | 13 | 20770348 | 7 | 0.473164 |
| rs4638420      | LOC650794 | 13 | 20770348 | 6 | 0.315113 |
| rs4638420      | LOC650794 | 13 | 20770348 | 4 | 2.516545 |
| rs9509664      | LOC728099 | 13 | 20830459 | 4 | 0.188261 |
| rs9509664      | LOC728099 | 13 | 20830459 | 3 | 3.640577 |
| rs9509664      | LOC728099 | 13 | 20830459 | 6 | 0.518371 |
| rs4770145      | LOC728099 | 13 | 20833210 | 4 | 0.273836 |
| rs1044069      | EFHA1     | 13 | 20964934 | 1 | 5.433878 |
| rs1800353      | SGCG      | 13 | 22796509 | 7 | 0.401274 |
| rs3751372      | SGCG      | 13 | 22796816 | 5 | 1.117382 |
| rs3751371      | SGCG      | 13 | 22796934 | 4 | 1.77567  |

|                |          |    |          |   |          |
|----------------|----------|----|----------|---|----------|
| rs3751371      | SGCG     | 13 | 22796934 | 5 | 1.908664 |
| rs3751371      | SGCG     | 13 | 22796934 | 3 | 1.032987 |
| rs3751371      | SGCG     | 13 | 22796934 | 2 | 5.666636 |
| rs3829352      | SGCG     | 13 | 22796975 | 4 | 1.251497 |
| rs3829352      | SGCG     | 13 | 22796975 | 3 | 1.464207 |
| rs3829352      | SGCG     | 13 | 22796975 | 5 | 1.150009 |
| rs2737700      | SACS     | 13 | 22806034 | 4 | 5.198041 |
| rs2737700      | SACS     | 13 | 22806034 | 5 | 5.170554 |
| rs2737700      | SACS     | 13 | 22806034 | 3 | 0.241003 |
| rs9550987      | TNFRSF19 | 13 | 23065505 | 1 | 4.162743 |
| rs3751363      | TNFRSF19 | 13 | 23141200 | 6 | 2.1406   |
| rs3751363      | TNFRSF19 | 13 | 23141200 | 8 | 5.06824  |
| rs3751361      | TNFRSF19 | 13 | 23141360 | 2 | 3.605813 |
| rs6490814      | TNFRSF19 | 13 | 23147957 | 6 | 0.087326 |
| rs9580931      | SPATA13  | 13 | 23775550 | 4 | 0.747047 |
| rs9580931      | SPATA13  | 13 | 23775550 | 3 | 0.322512 |
| rs9580931      | SPATA13  | 13 | 23775550 | 6 | 2.145265 |
| SNP13-23793684 | C1QTNF9  | 13 | 23793684 | 7 | 5.722221 |
| rs1822135      | PARP4    | 13 | 23906630 | 6 | 0.740109 |
| rs9511259      | PARP4    | 13 | 23907099 | 6 | 5.042128 |
| rs9511259      | PARP4    | 13 | 23907099 | 7 | 0.387562 |
| rs2722         | ATP12A   | 13 | 24183768 | 1 | 4.856248 |
| rs2722         | ATP12A   | 13 | 24183768 | 4 | 1.109221 |
| rs17081086     | ATP12A   | 13 | 24183811 | 1 | 3.640609 |
| rs17081086     | ATP12A   | 13 | 24183811 | 4 | 1.446088 |
| rs10507338     | ATP12A   | 13 | 24183914 | 1 | 4.81836  |
| rs10507338     | ATP12A   | 13 | 24183914 | 4 | 1.604846 |
| rs1451568      | RNF17    | 13 | 24265282 | 1 | 1.25703  |
| rs1451568      | RNF17    | 13 | 24265282 | 7 | 1.527232 |
| rs3783082      | RNF17    | 13 | 24326002 | 2 | 0.947185 |
| rs3783082      | RNF17    | 13 | 24326002 | 7 | 0.416255 |
| SNP13-24385103 | CENPJ    | 13 | 24385103 | 7 | 1.386699 |
| SNP13-24385103 | CENPJ    | 13 | 24385103 | 4 | 0.725047 |
| SNP13-24385103 | CENPJ    | 13 | 24385103 | 2 | 4.117828 |
| rs7995033      | MTMR6    | 13 | 24729888 | 4 | 0.121308 |
| rs7995033      | MTMR6    | 13 | 24729888 | 1 | 4.758967 |
| rs7335858      | ATP8A2   | 13 | 25171403 | 6 | 2.284965 |
| rs7335858      | ATP8A2   | 13 | 25171403 | 5 | 1.687057 |
| rs1055252      | TMEM46   | 13 | 25516922 | 3 | 0.003235 |
| rs12100154     | TMEM46   | 13 | 25517547 | 8 | 2.141851 |
| rs12100154     | TMEM46   | 13 | 25517547 | 2 | 6.193283 |
| rs12100154     | TMEM46   | 13 | 25517547 | 3 | 0.018045 |
| rs11558132     | RNF6     | 13 | 25693463 | 2 | 1.06107  |
| rs11558132     | RNF6     | 13 | 25693463 | 6 | 0.908182 |
| rs11558132     | RNF6     | 13 | 25693463 | 5 | 0.216235 |
| rs7669         | MTIF3    | 13 | 26907851 | 5 | 1.40997  |
| rs7669         | MTIF3    | 13 | 26907851 | 1 | 5.076824 |

|                |          |    |          |   |          |
|----------------|----------|----|----------|---|----------|
| rs7669         | MTIF3    | 13 | 26907851 | 3 | 0.372403 |
| rs7669         | MTIF3    | 13 | 26907851 | 6 | 8.140965 |
| rs11617897     | LNX2     | 13 | 27053920 | 3 | 0.677743 |
| SNP13-27460605 | PRHOXNB  | 13 | 27460605 | 7 | 0.073031 |
| rs1933437      | FLT3     | 13 | 27522294 | 3 | 0.019799 |
| rs11619230     | PAN3     | 13 | 27765245 | 2 | 2.994739 |
| rs4769636      | SLC46A3  | 13 | 28172633 | 3 | 0.142129 |
| rs4769636      | SLC46A3  | 13 | 28172633 | 7 | 6.496422 |
| rs4769636      | SLC46A3  | 13 | 28172633 | 5 | 8.018923 |
| rs4769636      | SLC46A3  | 13 | 28172633 | 2 | 3.736382 |
| rs4769636      | SLC46A3  | 13 | 28172633 | 4 | 0.797829 |
| rs2987346      | KIAA0774 | 13 | 28498415 | 3 | 0.697124 |
| rs3751336      | KIAA0774 | 13 | 28753847 | 8 | 0.648688 |
| SNP13-28796783 | KIAA0774 | 13 | 28796783 | 1 | 2.202121 |
| rs3011623      | SLC7A1   | 13 | 28984225 | 8 | 0.740162 |
| rs3011624      | SLC7A1   | 13 | 28985146 | 8 | 1.781263 |
| rs17689385     | KATNAL1  | 13 | 29676781 | 4 | 0.620883 |
| rs10161651     | KATNAL1  | 13 | 29678458 | 5 | 0.86867  |
| rs10161651     | KATNAL1  | 13 | 29678458 | 4 | 0.323713 |
| rs17632858     | KATNAL1  | 13 | 29678588 | 4 | 0.29659  |
| rs17632858     | KATNAL1  | 13 | 29678588 | 2 | 1.693896 |
| rs9506275      | KATNAL1  | 13 | 29679111 | 5 | 0.072978 |
| rs9506275      | KATNAL1  | 13 | 29679111 | 4 | 0.611985 |
| rs7328946      | KATNAL1  | 13 | 29680099 | 2 | 4.624394 |
| rs7328946      | KATNAL1  | 13 | 29680099 | 4 | 0.829752 |
| rs6490453      | KATNAL1  | 13 | 29779573 | 4 | 1.25357  |
| rs6490453      | KATNAL1  | 13 | 29779573 | 8 | 1.55015  |
| rs6490453      | KATNAL1  | 13 | 29779573 | 3 | 1.394475 |
| rs6490453      | KATNAL1  | 13 | 29779573 | 1 | 1.068183 |
| rs6490453      | KATNAL1  | 13 | 29779573 | 6 | 0.630705 |
| rs6490453      | KATNAL1  | 13 | 29779573 | 2 | 2.212094 |
| rs1047086      | HSPH1    | 13 | 30627729 | 1 | 1.735716 |
| rs1047086      | HSPH1    | 13 | 30627729 | 3 | 0.511828 |
| rs1047086      | HSPH1    | 13 | 30627729 | 7 | 6.730349 |
| rs17703938     | B3GALTL  | 13 | 30803498 | 3 | 0.409739 |
| rs756910       | EEF1DP3  | 13 | 31422656 | 4 | 0.335518 |
| rs756910       | EEF1DP3  | 13 | 31422656 | 5 | 0.139373 |
| rs17077179     | FRY      | 13 | 31645654 | 3 | 0.114044 |
| rs17077179     | FRY      | 13 | 31645654 | 5 | 1.315596 |
| rs1799943      | BRCA2    | 13 | 31788572 | 5 | 0.335248 |
| rs1799943      | BRCA2    | 13 | 31788572 | 4 | 2.969679 |
| rs1799943      | BRCA2    | 13 | 31788572 | 3 | 0.239659 |
| rs15869        | BRCA2    | 13 | 31871012 | 8 | 0.762488 |
| rs15869        | BRCA2    | 13 | 31871012 | 1 | 4.434159 |
| rs15869        | BRCA2    | 13 | 31871012 | 6 | 0.367288 |
| rs11571836     | BRCA2    | 13 | 31871439 | 4 | 1.643498 |
| rs11571836     | BRCA2    | 13 | 31871439 | 7 | 0.202422 |

|                |           |    |          |   |          |
|----------------|-----------|----|----------|---|----------|
| rs7994229      | PDS5B     | 13 | 32058705 | 5 | 6.85705  |
| rs7994229      | PDS5B     | 13 | 32058705 | 1 | 3.942491 |
| rs7994229      | PDS5B     | 13 | 32058705 | 8 | 5.454602 |
| rs648202       | KL        | 13 | 32533463 | 1 | 0.581237 |
| rs770266       | STARD13   | 13 | 32576065 | 4 | 0.441077 |
| SNP13-32602065 | STARD13   | 13 | 32602065 | 6 | 0.260765 |
| rs2274550      | NBEA      | 13 | 35127873 | 4 | 0.410165 |
| rs1045696      | DCLK1     | 13 | 35243816 | 4 | 0.679925 |
| rs2322807      | DCLK1     | 13 | 35283031 | 6 | 7.43507  |
| rs2322807      | DCLK1     | 13 | 35283031 | 4 | 3.114372 |
| rs2296968      | SOHLH2    | 13 | 35642910 | 5 | 2.013781 |
| rs9546784      | LOC728591 | 13 | 35699256 | 4 | 9.789636 |
| rs9546784      | LOC728591 | 13 | 35699256 | 1 | 5.529642 |
| rs9546784      | LOC728591 | 13 | 35699256 | 6 | 1.484146 |
| rs9546784      | LOC728591 | 13 | 35699256 | 5 | 1.70262  |
| rs9546785      | LOC728591 | 13 | 35699415 | 6 | 3.201366 |
| rs9546785      | LOC728591 | 13 | 35699415 | 5 | 1.992393 |
| rs9546785      | LOC728591 | 13 | 35699415 | 8 | 2.537705 |
| rs9546785      | LOC728591 | 13 | 35699415 | 1 | 4.430015 |
| rs9546785      | LOC728591 | 13 | 35699415 | 4 | 1.693265 |
| rs9546897      | LOC728591 | 13 | 35726237 | 1 | 4.825002 |
| rs9546897      | LOC728591 | 13 | 35726237 | 5 | 0.585014 |
| rs9546897      | LOC728591 | 13 | 35726237 | 6 | 0.67922  |
| rs9546897      | LOC728591 | 13 | 35726237 | 4 | 0.147671 |
| rs1998800      | LOC728591 | 13 | 35755639 | 8 | 1.40665  |
| rs1998800      | LOC728591 | 13 | 35755639 | 5 | 0.075541 |
| rs1886856      | LOC646871 | 13 | 35841777 | 6 | 0.300401 |
| rs1886856      | LOC646871 | 13 | 35841777 | 5 | 1.451557 |
| rs1886856      | LOC646871 | 13 | 35841777 | 2 | 3.832701 |
| rs1886856      | LOC646871 | 13 | 35841777 | 3 | 0.773989 |
| rs1886856      | LOC646871 | 13 | 35841777 | 4 | 4.985795 |
| rs10976        | RFXAP     | 13 | 36301143 | 1 | 4.504364 |
| rs10976        | RFXAP     | 13 | 36301143 | 7 | 4.679219 |
| rs1127446      | EXOSC8    | 13 | 36478139 | 8 | 0.167946 |
| rs1127446      | EXOSC8    | 13 | 36478139 | 2 | 0.427454 |
| rs1127446      | EXOSC8    | 13 | 36478139 | 4 | 0.887251 |
| rs1127446      | EXOSC8    | 13 | 36478139 | 7 | 0.32693  |
| rs1127446      | EXOSC8    | 13 | 36478139 | 5 | 4.200342 |
| rs1127446      | EXOSC8    | 13 | 36478139 | 1 | 0.726726 |
| rs1856028      | CSNK1A1L  | 13 | 36576149 | 1 | 3.906044 |
| rs1856028      | CSNK1A1L  | 13 | 36576149 | 4 | 3.546399 |
| rs17773251     | CSNK1A1L  | 13 | 36576884 | 3 | 6.01061  |
| rs17773251     | CSNK1A1L  | 13 | 36576884 | 6 | 3.683056 |
| rs9576175      | CSNK1A1L  | 13 | 36577268 | 3 | 1.001134 |
| rs9576175      | CSNK1A1L  | 13 | 36577268 | 4 | 0.386449 |
| rs9576175      | CSNK1A1L  | 13 | 36577268 | 1 | 0.938811 |
| rs9576176      | CSNK1A1L  | 13 | 36577535 | 1 | 3.042425 |

|            |           |    |          |   |          |
|------------|-----------|----|----------|---|----------|
| rs9576177  | CSNK1A1L  | 13 | 36577729 | 1 | 1.197459 |
| rs9576177  | CSNK1A1L  | 13 | 36577729 | 3 | 1.315913 |
| rs9576178  | CSNK1A1L  | 13 | 36577776 | 1 | 0.278869 |
| rs12583681 | TRPC4     | 13 | 37255494 | 4 | 4.358498 |
| rs7999240  | LOC646910 | 13 | 37466017 | 4 | 0.621569 |
| rs7999240  | LOC646910 | 13 | 37466017 | 2 | 0.91597  |
| rs7999240  | LOC646910 | 13 | 37466017 | 8 | 1.101776 |
| rs7999240  | LOC646910 | 13 | 37466017 | 1 | 2.121048 |
| rs2485783  | UFM1      | 13 | 37834310 | 2 | 4.179258 |
| rs2485783  | UFM1      | 13 | 37834310 | 8 | 5.084849 |
| rs2485783  | UFM1      | 13 | 37834310 | 3 | 4.869584 |
| rs2485783  | UFM1      | 13 | 37834310 | 7 | 0.382807 |
| rs2485783  | UFM1      | 13 | 37834310 | 4 | 4.191046 |
| rs2485783  | UFM1      | 13 | 37834310 | 1 | 4.857592 |
| rs2485783  | UFM1      | 13 | 37834310 | 5 | 4.146133 |
| rs9576597  | FREM2     | 13 | 38160435 | 3 | 0.496603 |
| rs9548505  | FREM2     | 13 | 38320624 | 3 | 0.529965 |
| rs7990956  | STOML3    | 13 | 38438353 | 8 | 0.025537 |
| rs9576697  | C13orf23  | 13 | 38484343 | 8 | 0.267183 |
| rs9576697  | C13orf23  | 13 | 38484343 | 6 | 0.09417  |
| rs9576711  | NHLRC3    | 13 | 38521621 | 6 | 8.533583 |
| rs9576711  | NHLRC3    | 13 | 38521621 | 8 | 5.412198 |
| rs3812883  | COG6      | 13 | 39127957 | 3 | 0.513899 |
| rs3812883  | COG6      | 13 | 39127957 | 2 | 5.338726 |
| rs3783167  | MRPS31    | 13 | 40221397 | 7 | 1.37192  |
| rs3783167  | MRPS31    | 13 | 40221397 | 8 | 1.044221 |
| rs3783167  | MRPS31    | 13 | 40221397 | 3 | 0.862769 |
| rs3783167  | MRPS31    | 13 | 40221397 | 4 | 0.024686 |
| rs9577152  | SLC25A15  | 13 | 40277272 | 6 | 1.783477 |
| rs1056824  | ELF1      | 13 | 40404884 | 2 | 2.43521  |
| rs1056824  | ELF1      | 13 | 40404884 | 3 | 0.67415  |
| rs1056824  | ELF1      | 13 | 40404884 | 1 | 0.846292 |
| rs7324235  | DGKH      | 13 | 41662564 | 6 | 3.562043 |
| rs7324235  | DGKH      | 13 | 41662564 | 3 | 0.487513 |
| rs7324235  | DGKH      | 13 | 41662564 | 8 | 0.101674 |
| rs545602   | DGKH      | 13 | 41701341 | 2 | 4.840586 |
| rs545602   | DGKH      | 13 | 41701341 | 3 | 0.18273  |
| rs545602   | DGKH      | 13 | 41701341 | 6 | 2.043557 |
| rs545602   | DGKH      | 13 | 41701341 | 8 | 3.241995 |
| rs9525605  | AKAP11    | 13 | 41771782 | 4 | 1.246673 |
| rs9315906  | AKAP11    | 13 | 41775265 | 4 | 0.064315 |
| rs9533064  | AKAP11    | 13 | 41792287 | 4 | 0.431903 |
| rs7335649  | C13orf30  | 13 | 42262859 | 7 | 1.054989 |
| rs7335649  | C13orf30  | 13 | 42262859 | 1 | 0.773905 |
| rs7335649  | C13orf30  | 13 | 42262859 | 6 | 2.410728 |
| rs1044856  | EPST11    | 13 | 42360422 | 8 | 6.221404 |
| rs1044856  | EPST11    | 13 | 42360422 | 4 | 1.519566 |

|                |           |    |          |   |          |
|----------------|-----------|----|----------|---|----------|
| rs1044856      | EPSTI1    | 13 | 42360422 | 6 | 0.635028 |
| rs1359184      | EPSTI1    | 13 | 42367211 | 2 | 2.446707 |
| rs1359184      | EPSTI1    | 13 | 42367211 | 7 | 0.489933 |
| rs1359184      | EPSTI1    | 13 | 42367211 | 1 | 0.733159 |
| rs1359184      | EPSTI1    | 13 | 42367211 | 4 | 0.792977 |
| rs3825511      | EPSTI1    | 13 | 42464373 | 1 | 0.808489 |
| rs3825511      | EPSTI1    | 13 | 42464373 | 3 | 0.130879 |
| rs3825511      | EPSTI1    | 13 | 42464373 | 6 | 0.106748 |
| rs3825511      | EPSTI1    | 13 | 42464373 | 8 | 0.459064 |
| rs3825511      | EPSTI1    | 13 | 42464373 | 4 | 1.819052 |
| rs17553284     | DNAJC15   | 13 | 42495706 | 8 | 1.337632 |
| rs17553284     | DNAJC15   | 13 | 42495706 | 3 | 2.59     |
| rs17553284     | DNAJC15   | 13 | 42495706 | 6 | 2.305016 |
| rs17553284     | DNAJC15   | 13 | 42495706 | 5 | 0.909664 |
| rs17553284     | DNAJC15   | 13 | 42495706 | 1 | 2.295093 |
| rs3816311      | CCDC122   | 13 | 43351783 | 1 | 1.233214 |
| rs3816311      | CCDC122   | 13 | 43351783 | 3 | 0.517098 |
| rs3816311      | CCDC122   | 13 | 43351783 | 7 | 1.176097 |
| rs3816311      | CCDC122   | 13 | 43351783 | 2 | 0.245271 |
| rs3816311      | CCDC122   | 13 | 43351783 | 8 | 5.888304 |
| rs11692        | TSC22D1   | 13 | 43905697 | 6 | 0.145999 |
| rs1053948      | TSC22D1   | 13 | 43906333 | 3 | 0.13484  |
| SNP13-4404625  | TSC22D1   | 13 | 44046257 | 5 | 4.329238 |
| rs9534059      | KCTD4     | 13 | 44666759 | 3 | 0.146094 |
| rs9534059      | KCTD4     | 13 | 44666759 | 4 | 4.448516 |
| rs7331090      | GTF2F2    | 13 | 44739502 | 3 | 0.180778 |
| rs7331090      | GTF2F2    | 13 | 44739502 | 4 | 0.263151 |
| rs7997155      | SLC25A30  | 13 | 44883608 | 5 | 0.323182 |
| SNP13-45185374 | SPERT     | 13 | 45185374 | 1 | 3.32654  |
| rs4942433      | LOC283514 | 13 | 45251691 | 8 | 6.119086 |
| rs4942433      | LOC283514 | 13 | 45251691 | 3 | 0.864802 |
| rs4942434      | LOC283514 | 13 | 45251787 | 3 | 0.451688 |
| rs17350833     | ZC3H13    | 13 | 45435758 | 3 | 1.243705 |
| rs17350833     | ZC3H13    | 13 | 45435758 | 5 | 0.651967 |
| rs1087         | CPB2      | 13 | 45525440 | 6 | 2.211912 |
| rs1087         | CPB2      | 13 | 45525440 | 4 | 1.836436 |
| rs1087         | CPB2      | 13 | 45525440 | 8 | 1.208954 |
| rs1087         | CPB2      | 13 | 45525440 | 1 | 0.495851 |
| rs1087         | CPB2      | 13 | 45525440 | 2 | 5.236637 |
| rs940          | CPB2      | 13 | 45525481 | 6 | 1.499099 |
| rs940          | CPB2      | 13 | 45525481 | 5 | 1.533306 |
| rs940          | CPB2      | 13 | 45525481 | 3 | 1.220757 |
| rs1926447      | CPB2      | 13 | 45527945 | 6 | 0.937712 |
| rs1926447      | CPB2      | 13 | 45527945 | 1 | 0.796433 |
| rs1926447      | CPB2      | 13 | 45527945 | 5 | 0.326149 |
| rs1926447      | CPB2      | 13 | 45527945 | 2 | 1.175915 |
| rs1926447      | CPB2      | 13 | 45527945 | 4 | 0.865208 |



|            |           |    |          |   |          |
|------------|-----------|----|----------|---|----------|
| rs1926447  | CPB2      | 13 | 45527945 | 3 | 0.520881 |
| rs2277440  | CPB2      | 13 | 45536827 | 8 | 0.465771 |
| rs9316179  | CPB2      | 13 | 45539467 | 4 | 4.560537 |
| rs9316179  | CPB2      | 13 | 45539467 | 6 | 1.820812 |
| rs9316179  | CPB2      | 13 | 45539467 | 1 | 3.759314 |
| rs9316179  | CPB2      | 13 | 45539467 | 8 | 0.14964  |
| rs7337140  | CPB2      | 13 | 45539482 | 5 | 0.756303 |
| rs7337140  | CPB2      | 13 | 45539482 | 3 | 1.827657 |
| rs7337140  | CPB2      | 13 | 45539482 | 2 | 3.490048 |
| rs3742264  | CPB2      | 13 | 45546095 | 4 | 0.331098 |
| rs3742264  | CPB2      | 13 | 45546095 | 1 | 4.186135 |
| rs3742264  | CPB2      | 13 | 45546095 | 6 | 0.887184 |
| rs2296642  | CPB2      | 13 | 45554670 | 5 | 0.948646 |
| rs1409431  | LCP1      | 13 | 45599207 | 7 | 4.037829 |
| rs17601331 | LCP1      | 13 | 45603069 | 5 | 4.244719 |
| rs2296118  | LCP1      | 13 | 45654333 | 1 | 3.503648 |
| rs1408184  | C13orf18  | 13 | 45844158 | 5 | 0.500976 |
| rs1408184  | C13orf18  | 13 | 45844158 | 1 | 4.658958 |
| rs1408184  | C13orf18  | 13 | 45844158 | 8 | 0.566363 |
| rs6313     | HTR2A     | 13 | 46367941 | 5 | 0.045798 |
| rs6313     | HTR2A     | 13 | 46367941 | 3 | 1.163339 |
| rs8248     | LOC647131 | 13 | 48447572 | 2 | 5.191309 |
| rs8248     | LOC647131 | 13 | 48447572 | 7 | 1.262873 |
| rs8248     | LOC647131 | 13 | 48447572 | 3 | 6.106871 |
| rs8248     | LOC647131 | 13 | 48447572 | 8 | 7.6235   |
| rs9535193  | CDADC1    | 13 | 48764323 | 8 | 0.072896 |
| rs9535193  | CDADC1    | 13 | 48764323 | 5 | 4.080569 |
| rs3751418  | CDADC1    | 13 | 48764870 | 5 | 1.173273 |
| rs3751418  | CDADC1    | 13 | 48764870 | 8 | 0.563036 |
| rs3751418  | CDADC1    | 13 | 48764870 | 2 | 1.587427 |
| rs3087770  | CDADC1    | 13 | 48765291 | 8 | 4.778588 |
| rs7998427  | SETDB2    | 13 | 48948621 | 1 | 0.211417 |
| rs7998427  | SETDB2    | 13 | 48948621 | 2 | 4.206449 |
| rs2031532  | PHF11     | 13 | 48978848 | 1 | 0.173694 |
| rs2031532  | PHF11     | 13 | 48978848 | 2 | 0.297402 |
| rs3033     | PHF11     | 13 | 49000993 | 1 | 0.153788 |
| rs3033     | PHF11     | 13 | 49000993 | 2 | 1.932637 |
| rs9562900  | RCBTB1    | 13 | 49039363 | 7 | 0.889757 |
| rs9526582  | ARL11     | 13 | 49105221 | 2 | 0.789851 |
| rs9526582  | ARL11     | 13 | 49105221 | 1 | 0.525144 |
| rs9526582  | ARL11     | 13 | 49105221 | 3 | 1.446295 |
| rs9526582  | ARL11     | 13 | 49105221 | 4 | 0.29379  |
| rs9526582  | ARL11     | 13 | 49105221 | 6 | 0.01201  |
| rs1127021  | KPNA3     | 13 | 49194116 | 4 | 0.846108 |
| rs9568354  | C13orf1   | 13 | 49385994 | 2 | 3.862104 |
| rs11839292 | C13orf1   | 13 | 49386112 | 7 | 0.456521 |
| rs11839292 | C13orf1   | 13 | 49386112 | 3 | 0.028454 |

|                |              |    |          |   |          |
|----------------|--------------|----|----------|---|----------|
| rs11839292     | C13orf1      | 13 | 49386112 | 8 | 2.889083 |
| rs1609571      | C13orf1      | 13 | 49386856 | 2 | 5.477463 |
| rs1063181      | C13orf1      | 13 | 49408402 | 4 | 3.739681 |
| rs2066549      | TRIM13       | 13 | 49488424 | 4 | 0.734063 |
| rs2066549      | TRIM13       | 13 | 49488424 | 2 | 4.264405 |
| rs2066549      | TRIM13       | 13 | 49488424 | 3 | 0.318449 |
| rs2066549      | TRIM13       | 13 | 49488424 | 7 | 0.02466  |
| rs3803200      | LOC647166    | 13 | 50556357 | 3 | 0.606707 |
| rs959952       | LOC647166    | 13 | 50584110 | 3 | 0.375903 |
| rs7318961      | LOC341674    | 13 | 50634084 | 3 | 1.913948 |
| rs17075482     | FAM124A      | 13 | 50724045 | 1 | 5.42915  |
| rs9535646      | LOC647174    | 13 | 50811709 | 2 | 2.257521 |
| rs9535646      | LOC647174    | 13 | 50811709 | 5 | 1.039071 |
| rs9535646      | LOC647174    | 13 | 50811709 | 4 | 0.763728 |
| rs17837214     | INTS6        | 13 | 50834201 | 7 | 0.236242 |
| rs17837216     | INTS6        | 13 | 50834636 | 7 | 0.516001 |
| rs2277445      | INTS6        | 13 | 50922937 | 8 | 0.867004 |
| rs2277445      | INTS6        | 13 | 50922937 | 2 | 1.424904 |
| rs2277445      | INTS6        | 13 | 50922937 | 7 | 0.616028 |
| rs2277445      | INTS6        | 13 | 50922937 | 5 | 0.275123 |
| rs2277445      | INTS6        | 13 | 50922937 | 3 | 0.081023 |
| rs2277445      | INTS6        | 13 | 50922937 | 4 | 0.918087 |
| rs1885854      | WDFY2        | 13 | 51211196 | 7 | 0.626103 |
| rs1885854      | WDFY2        | 13 | 51211196 | 4 | 0.336895 |
| rs7334118      | ATP7B        | 13 | 51411267 | 1 | 3.365443 |
| rs1061472      | ATP7B        | 13 | 51422489 | 8 | 1.177522 |
| rs1061472      | ATP7B        | 13 | 51422489 | 1 | 4.710793 |
| rs17402034     | UTP14C       | 13 | 51501897 | 5 | 10.95165 |
| SNP13-51574276 | NEK5         | 13 | 51574276 | 3 | 1.601736 |
| SNP13-51574276 | NEK5         | 13 | 51574276 | 6 | 0.563081 |
| rs1886540      | NEK3         | 13 | 51604877 | 1 | 4.364955 |
| rs9536067      | VPS36        | 13 | 51886351 | 5 | 3.242629 |
| rs617660       | RP11-78J21.1 | 13 | 52101390 | 5 | 0.848383 |
| rs9536243      | LECT1        | 13 | 52175640 | 5 | 0.86254  |
| rs9536244      | LECT1        | 13 | 52175647 | 5 | 2.638293 |
| rs7330220      | LECT1        | 13 | 52184951 | 8 | 0.167179 |
| rs17053844     | OLFM4        | 13 | 52523422 | 4 | 0.119321 |
| SNP13-59464645 | DIAPH3       | 13 | 59464645 | 1 | 6.042481 |
| rs339531       | DIAPH3       | 13 | 59485257 | 4 | 0.980385 |
| rs9563808      | LOC440142    | 13 | 59746943 | 1 | 0.257446 |
| rs9563808      | LOC440142    | 13 | 59746943 | 7 | 0.25393  |
| rs9563808      | LOC440142    | 13 | 59746943 | 5 | 0.609753 |
| rs9563808      | LOC440142    | 13 | 59746943 | 3 | 0.22376  |
| rs9563808      | LOC440142    | 13 | 59746943 | 2 | 1.93889  |
| rs9528094      | LOC440142    | 13 | 59747049 | 8 | 4.866386 |
| rs9528094      | LOC440142    | 13 | 59747049 | 5 | 4.534335 |
| rs9528094      | LOC440142    | 13 | 59747049 | 7 | 4.521824 |

|                |             |    |          |   |          |
|----------------|-------------|----|----------|---|----------|
| rs9528094      | LOC440142   | 13 | 59747049 | 3 | 5.301778 |
| rs3829388      | PCDH20      | 13 | 60882782 | 5 | 0.470512 |
| rs3812872      | PCDH20      | 13 | 60884919 | 5 | 1.416393 |
| rs3812872      | PCDH20      | 13 | 60884919 | 6 | 2.591432 |
| rs3812860      | PCDH9       | 13 | 66702233 | 1 | 5.467533 |
| rs7319217      | LOC647277   | 13 | 70396781 | 5 | 3.911792 |
| rs7319217      | LOC647277   | 13 | 70396781 | 3 | 3.256719 |
| rs7319217      | LOC647277   | 13 | 70396781 | 8 | 3.143134 |
| rs1465895      | RP11-11C5.2 | 13 | 72199805 | 7 | 0.452192 |
| rs1465895      | RP11-11C5.2 | 13 | 72199805 | 5 | 1.153497 |
| rs2165390      | DIS3        | 13 | 72229945 | 3 | 0.616834 |
| rs2165390      | DIS3        | 13 | 72229945 | 6 | 3.778865 |
| rs2165390      | DIS3        | 13 | 72229945 | 5 | 0.923513 |
| rs7332388      | DIS3        | 13 | 72247360 | 3 | 0.383373 |
| rs7332388      | DIS3        | 13 | 72247360 | 6 | 0.366912 |
| rs7332388      | DIS3        | 13 | 72247360 | 4 | 2.384081 |
| rs9565025      | LOC730242   | 13 | 73059553 | 3 | 0.082874 |
| rs9600137      | LOC730242   | 13 | 73060077 | 4 | 1.059291 |
| rs9543429      | KLF12       | 13 | 73164045 | 3 | 0.14196  |
| rs9318219      | KLF12       | 13 | 73284794 | 1 | 3.229507 |
| rs9318219      | KLF12       | 13 | 73284794 | 4 | 0.001592 |
| rs1998571      | KLF12       | 13 | 73284810 | 6 | 0.320774 |
| rs1998571      | KLF12       | 13 | 73284810 | 1 | 3.453905 |
| rs1998574      | KLF12       | 13 | 73284990 | 6 | 0.131596 |
| rs1998574      | KLF12       | 13 | 73284990 | 1 | 3.012578 |
| rs1998574      | KLF12       | 13 | 73284990 | 3 | 0.363706 |
| rs1998574      | KLF12       | 13 | 73284990 | 5 | 0.8469   |
| rs9543534      | LOC730245   | 13 | 73606697 | 1 | 0.29132  |
| rs477274       | LOC647288   | 13 | 74711555 | 8 | 1.872075 |
| rs477274       | LOC647288   | 13 | 74711555 | 4 | 1.246024 |
| rs477274       | LOC647288   | 13 | 74711555 | 6 | 1.583502 |
| rs477274       | LOC647288   | 13 | 74711555 | 2 | 3.761239 |
| rs477274       | LOC647288   | 13 | 74711555 | 5 | 3.860337 |
| rs477274       | LOC647288   | 13 | 74711555 | 3 | 2.180241 |
| rs7327548      | TBC1D4      | 13 | 74953821 | 6 | 5.957108 |
| rs7327548      | TBC1D4      | 13 | 74953821 | 7 | 6.823753 |
| rs7327548      | TBC1D4      | 13 | 74953821 | 4 | 1.094057 |
| rs9565177      | LMO7        | 13 | 75093404 | 2 | 5.068205 |
| rs9565177      | LMO7        | 13 | 75093404 | 4 | 0.425795 |
| SNP13-75293465 | LMO7        | 13 | 75293465 | 7 | 0.175681 |
| SNP13-75325404 | LMO7        | 13 | 75325404 | 4 | 0.035218 |
| SNP13-75325404 | LMO7        | 13 | 75325404 | 1 | 3.644006 |
| SNP13-75325404 | LMO7        | 13 | 75325404 | 8 | 6.406438 |
| rs9600566      | FLJ35379    | 13 | 75343190 | 3 | 1.83088  |
| rs9600566      | FLJ35379    | 13 | 75343190 | 7 | 1.137375 |
| rs9600567      | FLJ35379    | 13 | 75343317 | 1 | 0.121394 |
| rs9600567      | FLJ35379    | 13 | 75343317 | 3 | 0.211496 |

|                |           |    |          |   |          |
|----------------|-----------|----|----------|---|----------|
| rs10507837     | FLJ35379  | 13 | 75355396 | 1 | 1.376235 |
| rs700371       | KCTD12    | 13 | 76358368 | 5 | 1.480015 |
| rs654196       | CLN5      | 13 | 76463973 | 5 | 0.404994 |
| rs654196       | CLN5      | 13 | 76463973 | 8 | 0.127745 |
| rs654196       | CLN5      | 13 | 76463973 | 7 | 3.586158 |
| rs654196       | CLN5      | 13 | 76463973 | 3 | 0.735772 |
| rs654196       | CLN5      | 13 | 76463973 | 6 | 0.356599 |
| rs2813739      | SCEL      | 13 | 77114916 | 6 | 0.194804 |
| rs2813739      | SCEL      | 13 | 77114916 | 7 | 0.784542 |
| rs2813739      | SCEL      | 13 | 77114916 | 3 | 0.66697  |
| rs2813739      | SCEL      | 13 | 77114916 | 4 | 0.267091 |
| rs9601092      | POU4F1    | 13 | 78072092 | 3 | 0.137422 |
| rs9601092      | POU4F1    | 13 | 78072092 | 7 | 1.420387 |
| rs1044385      | C13orf7   | 13 | 78086535 | 6 | 4.613369 |
| rs1044385      | C13orf7   | 13 | 78086535 | 7 | 5.274555 |
| rs1044385      | C13orf7   | 13 | 78086535 | 3 | 0.586895 |
| rs1044385      | C13orf7   | 13 | 78086535 | 8 | 5.798254 |
| rs9565815      | LOC647317 | 13 | 82295537 | 1 | 0.008455 |
| rs553717       | GPC5      | 13 | 91143580 | 3 | 1.829799 |
| rs553717       | GPC5      | 13 | 91143580 | 2 | 3.865137 |
| rs553717       | GPC5      | 13 | 91143580 | 7 | 0.350301 |
| rs17645969     | GPC6      | 13 | 92677391 | 5 | 0.214015 |
| rs2274020      | GPC6      | 13 | 93832764 | 6 | 5.916105 |
| rs2274020      | GPC6      | 13 | 93832764 | 5 | 0.702162 |
| rs9524570      | GPR180    | 13 | 94079619 | 6 | 5.200311 |
| rs9524570      | GPR180    | 13 | 94079619 | 4 | 1.347776 |
| rs9524570      | GPR180    | 13 | 94079619 | 1 | 4.705975 |
| rs9524570      | GPR180    | 13 | 94079619 | 5 | 0.056368 |
| rs9524570      | GPR180    | 13 | 94079619 | 7 | 0.713757 |
| rs3765534      | ABCC4     | 13 | 94613416 | 1 | 5.89511  |
| rs2274405      | ABCC4     | 13 | 94656979 | 2 | 0.711973 |
| rs2274405      | ABCC4     | 13 | 94656979 | 5 | 0.601342 |
| rs2274405      | ABCC4     | 13 | 94656979 | 1 | 0.787654 |
| rs899494       | ABCC4     | 13 | 94659805 | 2 | 3.675817 |
| rs7333332      | DZIP1     | 13 | 95030684 | 7 | 0.096879 |
| rs7333332      | DZIP1     | 13 | 95030684 | 1 | 5.390683 |
| rs7333332      | DZIP1     | 13 | 95030684 | 6 | 1.359081 |
| rs11070136     | DZIP1     | 13 | 95037806 | 1 | 5.440623 |
| rs11070136     | DZIP1     | 13 | 95037806 | 7 | 0.872422 |
| SNP13-95091632 | DZIP1     | 13 | 95091632 | 8 | 6.905829 |
| SNP13-95091632 | DZIP1     | 13 | 95091632 | 3 | 0.246633 |
| SNP13-95091632 | DZIP1     | 13 | 95091632 | 1 | 2.907219 |
| rs816142       | UGCGL2    | 13 | 95436637 | 5 | 0.507475 |
| rs12863903     | UGCGL2    | 13 | 95436652 | 8 | 6.506473 |
| rs12863903     | UGCGL2    | 13 | 95436652 | 2 | 3.123766 |
| rs12863903     | UGCGL2    | 13 | 95436652 | 7 | 0.397111 |
| rs4771259      | HS6ST3    | 13 | 96284378 | 1 | 6.120171 |

|            |           |    |           |   |          |
|------------|-----------|----|-----------|---|----------|
| rs4771259  | HS6ST3    | 13 | 96284378  | 4 | 0.193001 |
| rs4771259  | HS6ST3    | 13 | 96284378  | 8 | 1.006051 |
| rs7318501  | HS6ST3    | 13 | 96284946  | 8 | 1.19816  |
| rs3742123  | HS6ST3    | 13 | 96286117  | 3 | 0.765465 |
| rs3864     | HS6ST3    | 13 | 96286350  | 7 | 0.550802 |
| rs3864     | HS6ST3    | 13 | 96286350  | 5 | 0.662458 |
| rs3864     | HS6ST3    | 13 | 96286350  | 4 | 1.980487 |
| rs3864     | HS6ST3    | 13 | 96286350  | 6 | 0.549314 |
| rs2282135  | HS6ST3    | 13 | 96287906  | 1 | 4.706278 |
| rs2282135  | HS6ST3    | 13 | 96287906  | 6 | 0.378342 |
| rs2282135  | HS6ST3    | 13 | 96287906  | 7 | 0.000624 |
| rs2282135  | HS6ST3    | 13 | 96287906  | 5 | 1.572946 |
| rs9556649  | OXGR1     | 13 | 96444584  | 3 | 0.31446  |
| rs9556649  | OXGR1     | 13 | 96444584  | 2 | 4.066356 |
| rs9584575  | LOC727934 | 13 | 96882676  | 6 | 6.075967 |
| rs1159277  | LOC727934 | 13 | 96883325  | 5 | 0.450739 |
| rs1159277  | LOC727934 | 13 | 96883325  | 7 | 0.402805 |
| rs1159277  | LOC727934 | 13 | 96883325  | 4 | 0.652911 |
| rs1159277  | LOC727934 | 13 | 96883325  | 1 | 5.373127 |
| rs1159277  | LOC727934 | 13 | 96883325  | 6 | 1.389245 |
| rs12868356 | LOC728155 | 13 | 97593090  | 2 | 2.947481 |
| rs774690   | RNF113B   | 13 | 97626261  | 4 | 1.263446 |
| rs774690   | RNF113B   | 13 | 97626261  | 8 | 6.21502  |
| rs9584850  | FARP1     | 13 | 97899427  | 7 | 6.676537 |
| rs9584850  | FARP1     | 13 | 97899427  | 5 | 0.001882 |
| rs9584850  | FARP1     | 13 | 97899427  | 8 | 7.868573 |
| rs9584850  | FARP1     | 13 | 97899427  | 3 | 0.09317  |
| rs4584     | FARP1     | 13 | 97899870  | 7 | 0.024957 |
| rs4584     | FARP1     | 13 | 97899870  | 3 | 0.124647 |
| rs4584     | FARP1     | 13 | 97899870  | 8 | 0.131129 |
| rs4584     | FARP1     | 13 | 97899870  | 5 | 0.200896 |
| rs7331216  | SLC15A1   | 13 | 98134920  | 7 | 1.72392  |
| rs8187832  | SLC15A1   | 13 | 98138772  | 7 | 2.704051 |
| rs12859979 | DOCK9     | 13 | 98260478  | 1 | 3.569344 |
| rs3742130  | GPR18     | 13 | 98705342  | 6 | 6.711658 |
| rs3742130  | GPR18     | 13 | 98705342  | 5 | 0.459642 |
| rs3742130  | GPR18     | 13 | 98705342  | 3 | 0.387922 |
| rs3742130  | GPR18     | 13 | 98705342  | 7 | 2.439493 |
| rs13542    | ZIC2      | 13 | 99436393  | 7 | 0.47989  |
| rs3742244  | TMTC4     | 13 | 100054564 | 4 | 0.460706 |
| rs3742244  | TMTC4     | 13 | 100054564 | 8 | 7.116412 |
| rs8922     | NALCN     | 13 | 100504194 | 5 | 1.703288 |
| rs8922     | NALCN     | 13 | 100504194 | 4 | 0.304565 |
| rs8922     | NALCN     | 13 | 100504194 | 3 | 0.291244 |
| rs686141   | NALCN     | 13 | 100534076 | 8 | 0.076687 |
| rs686141   | NALCN     | 13 | 100534076 | 4 | 0.301821 |
| rs1140605  | ITGBL1    | 13 | 101018194 | 3 | 0.15417  |

|                |           |    |           |   |          |
|----------------|-----------|----|-----------|---|----------|
| rs7331453      | LOC728123 | 13 | 101252468 | 1 | 1.216321 |
| rs7331453      | LOC728123 | 13 | 101252468 | 8 | 5.378572 |
| rs2282282      | LOC283481 | 13 | 101845260 | 8 | 4.321504 |
| rs2282282      | LOC283481 | 13 | 101845260 | 2 | 9.330354 |
| rs2282282      | LOC283481 | 13 | 101845260 | 1 | 0.856842 |
| rs1587         | LOC196541 | 13 | 102136231 | 5 | 0.582233 |
| rs660207       | LOC196541 | 13 | 102137366 | 5 | 0.011541 |
| SNP13-10214480 | LOC196541 | 13 | 102144807 | 1 | 0.275965 |
| rs9554897      | FLJ40176  | 13 | 102181418 | 3 | 0.965575 |
| rs17592564     | LOC643677 | 13 | 102198034 | 3 | 0.995147 |
| rs17592564     | LOC643677 | 13 | 102198034 | 5 | 0.14686  |
| rs1026158      | LOC643677 | 13 | 102198084 | 6 | 0.078516 |
| rs1026158      | LOC643677 | 13 | 102198084 | 3 | 1.01924  |
| rs12583104     | LOC643677 | 13 | 102198730 | 1 | 2.88111  |
| rs4743         | BIVM      | 13 | 102291826 | 2 | 2.36894  |
| rs4743         | BIVM      | 13 | 102291826 | 1 | 0.061804 |
| rs4743         | BIVM      | 13 | 102291826 | 4 | 0.15266  |
| rs4743         | BIVM      | 13 | 102291826 | 5 | 0.008436 |
| rs751402       | ERCC5     | 13 | 102296199 | 8 | 1.762352 |
| rs751402       | ERCC5     | 13 | 102296199 | 5 | 0.081341 |
| rs17655        | ERCC5     | 13 | 102326003 | 4 | 0.271121 |
| rs17655        | ERCC5     | 13 | 102326003 | 8 | 0.666543 |
| rs17655        | ERCC5     | 13 | 102326003 | 1 | 6.254016 |
| rs873601       | ERCC5     | 13 | 102326338 | 1 | 4.036133 |
| rs873601       | ERCC5     | 13 | 102326338 | 8 | 0.602836 |
| rs873601       | ERCC5     | 13 | 102326338 | 6 | 1.195394 |
| rs9518965      | LOC728183 | 13 | 102727440 | 7 | 2.134623 |
| rs2769914      | LOC728215 | 13 | 106620247 | 8 | 1.324436 |
| rs2769914      | LOC728215 | 13 | 106620247 | 7 | 0.627302 |
| rs2769914      | LOC728215 | 13 | 106620247 | 6 | 0.089239 |
| rs2769914      | LOC728215 | 13 | 106620247 | 1 | 2.246353 |
| rs2769914      | LOC728215 | 13 | 106620247 | 2 | 1.561404 |
| rs2769914      | LOC728215 | 13 | 106620247 | 3 | 1.121057 |
| rs9521141      | MYO16     | 13 | 108505828 | 1 | 2.621828 |
| rs157024       | MYO16     | 13 | 108575504 | 1 | 0.04976  |
| rs9559516      | MYO16     | 13 | 108657946 | 7 | 0.90098  |
| rs7993754      | MYO16     | 13 | 108658175 | 3 | 1.08453  |
| rs4773092      | IRS2      | 13 | 109233954 | 2 | 1.459491 |
| rs4773092      | IRS2      | 13 | 109233954 | 7 | 0.106455 |
| rs4773092      | IRS2      | 13 | 109233954 | 3 | 0.654838 |
| rs16975492     | COL4A1    | 13 | 109631703 | 5 | 0.058754 |
| rs16975492     | COL4A1    | 13 | 109631703 | 3 | 0.016002 |
| rs16975492     | COL4A1    | 13 | 109631703 | 8 | 1.226066 |
| rs7990009      | COL4A2    | 13 | 109757689 | 8 | 0.998305 |
| rs7990009      | COL4A2    | 13 | 109757689 | 4 | 0.886557 |
| rs7990009      | COL4A2    | 13 | 109757689 | 5 | 0.42614  |
| rs7990009      | COL4A2    | 13 | 109757689 | 1 | 0.112796 |

|            |              |    |           |   |          |
|------------|--------------|----|-----------|---|----------|
| rs7990009  | COL4A2       | 13 | 109757689 | 2 | 1.075715 |
| rs7327528  | LOC728814    | 13 | 109758045 | 3 | 0.677952 |
| rs4103     | COL4A2       | 13 | 109896227 | 8 | 0.104742 |
| rs4103     | COL4A2       | 13 | 109896227 | 3 | 0.222363 |
| rs4103     | COL4A2       | 13 | 109896227 | 5 | 2.531658 |
| rs7990214  | COL4A2       | 13 | 109909174 | 8 | 4.634658 |
| rs7990214  | COL4A2       | 13 | 109909174 | 5 | 0.600156 |
| rs7990214  | COL4A2       | 13 | 109909174 | 1 | 4.592398 |
| rs7990214  | COL4A2       | 13 | 109909174 | 3 | 0.875808 |
| rs7990383  | COL4A2       | 13 | 109909236 | 5 | 0.287925 |
| rs7990383  | COL4A2       | 13 | 109909236 | 1 | 3.5791   |
| rs7990383  | COL4A2       | 13 | 109909236 | 8 | 4.119253 |
| rs7990383  | COL4A2       | 13 | 109909236 | 3 | 0.187313 |
| rs9583500  | COL4A2       | 13 | 109919621 | 1 | 2.287269 |
| rs9583500  | COL4A2       | 13 | 109919621 | 3 | 0.972265 |
| rs9521879  | FLJ10769     | 13 | 110084940 | 4 | 0.690325 |
| rs12875067 | ING1         | 13 | 110163105 | 3 | 0.548369 |
| rs12875067 | ING1         | 13 | 110163105 | 7 | 1.514859 |
| rs12875067 | ING1         | 13 | 110163105 | 2 | 0.47468  |
| rs1441043  | ING1         | 13 | 110165651 | 7 | 1.123701 |
| rs1441043  | ING1         | 13 | 110165651 | 3 | 1.082602 |
| rs4771713  | C13orf29     | 13 | 110317400 | 8 | 4.822746 |
| rs2277424  | C13orf29     | 13 | 110320421 | 4 | 0.911362 |
| rs2296354  | ARHGEF7      | 13 | 110668038 | 7 | 1.231273 |
| rs2296354  | ARHGEF7      | 13 | 110668038 | 6 | 0.497501 |
| rs1555751  | ARHGEF7      | 13 | 110753466 | 1 | 5.614749 |
| rs6492352  | ARHGEF7      | 13 | 110753908 | 4 | 0.924057 |
| rs6492352  | ARHGEF7      | 13 | 110753908 | 1 | 3.648374 |
| rs12855715 | C13orf16     | 13 | 110771099 | 7 | 4.864538 |
| rs12855715 | C13orf16     | 13 | 110771099 | 6 | 1.031501 |
| rs1359428  | C13orf16     | 13 | 110778538 | 7 | 0.487369 |
| rs1359428  | C13orf16     | 13 | 110778538 | 3 | 0.49064  |
| rs4907715  | LOC729192    | 13 | 112155252 | 3 | 0.943899 |
| rs4907715  | LOC729192    | 13 | 112155252 | 2 | 0.295601 |
| rs4907733  | FLJ26443     | 13 | 112349790 | 2 | 2.962944 |
| rs9603932  | FLJ26443     | 13 | 112386009 | 5 | 1.403571 |
| rs1290177  | ATP11A       | 13 | 112584133 | 1 | 1.109558 |
| rs1290177  | ATP11A       | 13 | 112584133 | 2 | 0.602713 |
| rs3814264  | MCF2L        | 13 | 112776782 | 1 | 1.6464   |
| rs2281723  | MCF2L        | 13 | 112787227 | 7 | 0.813806 |
| rs2281723  | MCF2L        | 13 | 112787227 | 6 | 0.553831 |
| rs9604022  | MCF2L        | 13 | 112789591 | 3 | 0.096733 |
| rs9604022  | MCF2L        | 13 | 112789591 | 1 | 3.880515 |
| rs6046     | F7           | 13 | 112821160 | 5 | 0.214728 |
| rs3024772  | PROZ         | 13 | 112874101 | 7 | 5.379518 |
| rs3024772  | PROZ         | 13 | 112874101 | 1 | 4.149325 |
| rs7331116  | DKFZp451A211 | 13 | 113103906 | 8 | 0.140464 |

|                |              |    |           |   |          |
|----------------|--------------|----|-----------|---|----------|
| rs7331116      | DKFZp451A211 | 13 | 113103906 | 5 | 0.479158 |
| rs7331116      | DKFZp451A211 | 13 | 113103906 | 7 | 0.358213 |
| rs1018649      | DKFZp451A211 | 13 | 113105029 | 7 | 3.524585 |
| rs1018648      | DKFZp451A211 | 13 | 113105198 | 5 | 0.063188 |
| rs9577553      | DCUN1D2      | 13 | 113158146 | 2 | 2.706701 |
| rs9577553      | DCUN1D2      | 13 | 113158146 | 8 | 2.864203 |
| rs1386         | DCUN1D2      | 13 | 113158236 | 7 | 1.254716 |
| rs13705        | DCUN1D2      | 13 | 113158408 | 1 | 3.343014 |
| rs2260335      | TMCO3        | 13 | 113223033 | 1 | 0.111823 |
| rs2260335      | TMCO3        | 13 | 113223033 | 8 | 1.379409 |
| rs7319493      | TMCO3        | 13 | 113223039 | 4 | 0.323804 |
| rs7399982      | FLJ44054     | 13 | 113490063 | 3 | 0.566978 |
| rs9604529      | FLJ44054     | 13 | 113491346 | 7 | 0.358324 |
| rs7400002      | GAS6         | 13 | 113588999 | 7 | 0.4271   |
| rs7400002      | GAS6         | 13 | 113588999 | 2 | 0.881896 |
| rs7400002      | GAS6         | 13 | 113588999 | 1 | 2.058998 |
| rs3752105      | UPF3A        | 13 | 114065407 | 3 | 0.396068 |
| rs3752105      | UPF3A        | 13 | 114065407 | 7 | 1.150969 |
| rs1958716      | OR4L1        | 14 | 19598161  | 5 | 3.333266 |
| rs1958716      | OR4L1        | 14 | 19598161  | 7 | 2.185894 |
| rs1958717      | OR4L1        | 14 | 19598202  | 5 | 0.853554 |
| rs1958717      | OR4L1        | 14 | 19598202  | 7 | 3.052655 |
| rs2775253      | OR4L1        | 14 | 19598345  | 5 | 1.591523 |
| rs4981088      | OR11G2       | 14 | 19735680  | 7 | 1.835776 |
| rs4981088      | OR11G2       | 14 | 19735680  | 5 | 3.434697 |
| rs4981088      | OR11G2       | 14 | 19735680  | 6 | 2.472178 |
| rs17277228     | OR11H6       | 14 | 19762483  | 6 | 2.289737 |
| rs17277228     | OR11H6       | 14 | 19762483  | 8 | 1.740199 |
| rs17277228     | OR11H6       | 14 | 19762483  | 7 | 2.458763 |
| rs1132644      | CCNB1IP1     | 14 | 19854558  | 4 | 0.952751 |
| rs3093872      | RPPH1        | 14 | 19881172  | 8 | 0.487477 |
| rs17211355     | TEP1         | 14 | 19914223  | 6 | 0.205234 |
| SNP14-19921596 | TEP1         | 14 | 19921596  | 8 | 3.203073 |
| rs1760904      | TEP1         | 14 | 19921869  | 4 | 0.455324 |
| rs1760904      | TEP1         | 14 | 19921869  | 7 | 1.044307 |
| rs1760904      | TEP1         | 14 | 19921869  | 8 | 0.207104 |
| rs2228041      | TEP1         | 14 | 19922107  | 7 | 0.364303 |
| rs1760903      | TEP1         | 14 | 19922657  | 8 | 0.147741 |
| rs1760903      | TEP1         | 14 | 19922657  | 4 | 3.039474 |
| rs1760903      | TEP1         | 14 | 19922657  | 7 | 0.133465 |
| rs7145318      | KLHL33       | 14 | 19966904  | 7 | 0.959486 |
| rs7145318      | KLHL33       | 14 | 19966904  | 1 | 3.508088 |
| rs7145318      | KLHL33       | 14 | 19966904  | 3 | 1.263421 |
| rs1953225      | KLHL33       | 14 | 19967516  | 1 | 1.557028 |
| rs8017682      | LOC728219    | 14 | 19973618  | 7 | 0.775205 |
| rs8017603      | LOC728219    | 14 | 19973746  | 7 | 1.446436 |
| rs8017603      | LOC728219    | 14 | 19973746  | 3 | 0.472305 |



|                |           |    |          |   |          |
|----------------|-----------|----|----------|---|----------|
| rs938883       | OSGEP     | 14 | 19986798 | 2 | 2.428915 |
| rs938883       | OSGEP     | 14 | 19986798 | 4 | 0.887411 |
| rs938883       | OSGEP     | 14 | 19986798 | 7 | 0.838329 |
| rs1760944      | OSGEP     | 14 | 19992989 | 3 | 2.79496  |
| rs1760944      | OSGEP     | 14 | 19992989 | 4 | 2.516783 |
| rs1760944      | OSGEP     | 14 | 19992989 | 2 | 4.542563 |
| rs3136814      | APEX1     | 14 | 19993137 | 3 | 0.97137  |
| rs1049564      | NP        | 14 | 20010446 | 6 | 0.508929 |
| rs1049564      | NP        | 14 | 20010446 | 2 | 6.472862 |
| rs45440293     | RNASE11   | 14 | 20128162 | 7 | 3.34221  |
| rs45440293     | RNASE11   | 14 | 20128162 | 4 | 3.169806 |
| rs11622794     | OR6S1     | 14 | 20179566 | 1 | 0.184872 |
| rs3748338      | RNASE4    | 14 | 20237416 | 3 | 0.472878 |
| rs3748338      | RNASE4    | 14 | 20237416 | 1 | 4.429773 |
| rs1815437      | FAM12A    | 14 | 20283985 | 4 | 0.182491 |
| rs1815437      | FAM12A    | 14 | 20283985 | 1 | 2.844267 |
| rs1815437      | FAM12A    | 14 | 20283985 | 3 | 0.276387 |
| rs10135976     | FAM12A    | 14 | 20285568 | 3 | 2.45995  |
| rs10135976     | FAM12A    | 14 | 20285568 | 1 | 2.20938  |
| rs10135976     | FAM12A    | 14 | 20285568 | 4 | 5.268983 |
| rs11847654     | FAM12A    | 14 | 20285837 | 5 | 0.029524 |
| rs11847654     | FAM12A    | 14 | 20285837 | 7 | 0.351268 |
| rs11847654     | FAM12A    | 14 | 20285837 | 1 | 4.145565 |
| rs3827907      | FAM12B    | 14 | 20308638 | 5 | 0.761384 |
| rs17096021     | FAM12B    | 14 | 20308702 | 3 | 0.636041 |
| rs17096253     | FAM12B    | 14 | 20308944 | 4 | 1.364837 |
| rs17096253     | FAM12B    | 14 | 20308944 | 3 | 0.205062 |
| rs2234632      | SLC39A2   | 14 | 20537753 | 3 | 0.225651 |
| rs2234632      | SLC39A2   | 14 | 20537753 | 4 | 0.907323 |
| rs3748348      | RNASE13   | 14 | 20571035 | 7 | 4.212187 |
| rs17099500     | RNASE13   | 14 | 20572665 | 3 | 1.431519 |
| rs17099500     | RNASE13   | 14 | 20572665 | 5 | 0.42838  |
| rs2765901      | RNASE7    | 14 | 20580320 | 4 | 0.587286 |
| rs2765901      | RNASE7    | 14 | 20580320 | 3 | 1.069405 |
| SNP14-20616194 | FLJ10357  | 14 | 20616194 | 4 | 1.019726 |
| rs7143633      | FLJ10357  | 14 | 20619733 | 4 | 0.521785 |
| rs7143633      | FLJ10357  | 14 | 20619733 | 3 | 0.012565 |
| rs1958395      | FLJ10357  | 14 | 20620898 | 4 | 1.216698 |
| rs1958395      | FLJ10357  | 14 | 20620898 | 3 | 0.052337 |
| rs1958396      | FLJ10357  | 14 | 20620909 | 3 | 0.065236 |
| rs749731       | FLJ10357  | 14 | 20622844 | 5 | 5.69743  |
| rs749731       | FLJ10357  | 14 | 20622844 | 1 | 5.028364 |
| rs943992       | FLJ10357  | 14 | 20622897 | 5 | 0.885771 |
| rs943992       | FLJ10357  | 14 | 20622897 | 1 | 4.076629 |
| rs4982408      | C14orf176 | 14 | 20640454 | 5 | 5.369728 |
| rs4982408      | C14orf176 | 14 | 20640454 | 1 | 5.944941 |
| rs4982408      | C14orf176 | 14 | 20640454 | 3 | 3.487414 |

|                |           |    |          |   |          |
|----------------|-----------|----|----------|---|----------|
| rs1057718      | C14orf176 | 14 | 20641463 | 1 | 8.63602  |
| rs1057718      | C14orf176 | 14 | 20641463 | 3 | 0.210697 |
| rs1057718      | C14orf176 | 14 | 20641463 | 6 | 6.781207 |
| rs1057718      | C14orf176 | 14 | 20641463 | 4 | 3.553404 |
| rs45486304     | ZNF219    | 14 | 20642680 | 6 | 1.791278 |
| rs7161544      | OR5AU1    | 14 | 20693488 | 5 | 0.139918 |
| rs7161544      | OR5AU1    | 14 | 20693488 | 6 | 0.199734 |
| rs4982419      | OR5AU1    | 14 | 20693676 | 5 | 2.958193 |
| rs4982419      | OR5AU1    | 14 | 20693676 | 8 | 2.105527 |
| rs10149869     | LOC401744 | 14 | 20701266 | 5 | 0.003707 |
| rs10138887     | LOC401744 | 14 | 20701491 | 7 | 1.005117 |
| rs11852150     | LOC401744 | 14 | 20701763 | 3 | 3.452677 |
| rs11852150     | LOC401744 | 14 | 20701763 | 7 | 4.113117 |
| rs11852150     | LOC401744 | 14 | 20701763 | 5 | 2.684607 |
| rs11852150     | LOC401744 | 14 | 20701763 | 2 | 3.82504  |
| rs11852150     | LOC401744 | 14 | 20701763 | 1 | 3.707154 |
| rs11852150     | LOC401744 | 14 | 20701763 | 4 | 2.953828 |
| rs6571751      | RPGRIP1   | 14 | 20840570 | 4 | 2.875135 |
| rs6571751      | RPGRIP1   | 14 | 20840570 | 8 | 4.001225 |
| rs6571751      | RPGRIP1   | 14 | 20840570 | 3 | 0.757878 |
| SNP14-20859880 | RPGRIP1   | 14 | 20859880 | 5 | 0.170278 |
| SNP14-20859880 | RPGRIP1   | 14 | 20859880 | 1 | 3.538648 |
| SNP14-20859880 | RPGRIP1   | 14 | 20859880 | 8 | 1.665938 |
| rs9322965      | RPGRIP1   | 14 | 20862651 | 5 | 0.536393 |
| rs9322965      | RPGRIP1   | 14 | 20862651 | 1 | 4.216892 |
| rs9322965      | RPGRIP1   | 14 | 20862651 | 3 | 0.425175 |
| rs9322965      | RPGRIP1   | 14 | 20862651 | 8 | 0.496967 |
| rs3748361      | RPGRIP1   | 14 | 20866624 | 5 | 0.049417 |
| rs1061027      | TOX4      | 14 | 21036973 | 5 | 7.681009 |
| rs1061027      | TOX4      | 14 | 21036973 | 2 | 3.38762  |
| rs1061027      | TOX4      | 14 | 21036973 | 7 | 0.048397 |
| rs1061027      | TOX4      | 14 | 21036973 | 3 | 0.029039 |
| rs1061027      | TOX4      | 14 | 21036973 | 1 | 0.049376 |
| rs10467787     | TRAV32    | 14 | 21723351 | 8 | 1.651666 |
| rs227003       | TRAJ13    | 14 | 22069902 | 1 | 0.42     |
| rs227003       | TRAJ13    | 14 | 22069902 | 3 | 0.067556 |
| rs15795        | TRAC      | 14 | 22090478 | 3 | 0.387218 |
| rs3700         | TRAC      | 14 | 22090759 | 5 | 0.336168 |
| rs3700         | TRAC      | 14 | 22090759 | 4 | 0.061539 |
| rs3700         | TRAC      | 14 | 22090759 | 1 | 2.015739 |
| rs3700         | TRAC      | 14 | 22090759 | 6 | 0.443561 |
| rs3700         | TRAC      | 14 | 22090759 | 8 | 1.502259 |
| rs9125         | TRAC      | 14 | 22090879 | 1 | 0.419997 |
| rs1051101      | DAD1      | 14 | 22127924 | 5 | 7.41858  |
| rs1051101      | DAD1      | 14 | 22127924 | 6 | 6.736469 |
| rs1957374      | OXA1L     | 14 | 22305648 | 1 | 0.984586 |
| rs1957374      | OXA1L     | 14 | 22305648 | 2 | 4.796699 |

|                |           |    |          |   |          |
|----------------|-----------|----|----------|---|----------|
| rs1957374      | OXA1L     | 14 | 22305648 | 3 | 1.401924 |
| rs1957374      | OXA1L     | 14 | 22305648 | 8 | 5.633421 |
| rs3811188      | MRPL52    | 14 | 22368975 | 3 | 0.220608 |
| rs3811188      | MRPL52    | 14 | 22368975 | 8 | 2.640931 |
| rs3811188      | MRPL52    | 14 | 22368975 | 1 | 2.472224 |
| rs4982685      | MRPL52    | 14 | 22369126 | 3 | 0.468502 |
| rs4982685      | MRPL52    | 14 | 22369126 | 1 | 4.00174  |
| rs8014119      | REM2      | 14 | 22423906 | 3 | 0.896778 |
| rs2295680      | RBM23     | 14 | 22444275 | 5 | 0.011708 |
| rs2295680      | RBM23     | 14 | 22444275 | 3 | 0.844304 |
| rs2295680      | RBM23     | 14 | 22444275 | 8 | 0.706848 |
| rs2295680      | RBM23     | 14 | 22444275 | 7 | 0.281163 |
| SNP14-22445404 | RBM23     | 14 | 22445404 | 6 | 1.20052  |
| SNP14-22445404 | RBM23     | 14 | 22445404 | 1 | 4.179563 |
| SNP14-22618627 | ACIN1     | 14 | 22618627 | 7 | 4.066987 |
| SNP14-22618633 | ACIN1     | 14 | 22618633 | 7 | 0.699676 |
| rs3751501      | ACIN1     | 14 | 22619125 | 1 | 5.521504 |
| rs3751501      | ACIN1     | 14 | 22619125 | 4 | 3.230176 |
| rs6736         | C14orf119 | 14 | 22637614 | 1 | 6.01562  |
| rs6736         | C14orf119 | 14 | 22637614 | 5 | 0.179181 |
| rs6736         | C14orf119 | 14 | 22637614 | 4 | 4.652188 |
| rs6736         | C14orf119 | 14 | 22637614 | 7 | 0.624611 |
| rs3742485      | C14orf119 | 14 | 22638126 | 7 | 0.775849 |
| rs3742485      | C14orf119 | 14 | 22638126 | 1 | 4.36058  |
| rs3742486      | C14orf119 | 14 | 22638216 | 1 | 3.228927 |
| rs3742486      | C14orf119 | 14 | 22638216 | 4 | 0.806178 |
| rs9972278      | C14orf119 | 14 | 22638334 | 3 | 0.652225 |
| rs8007215      | C14orf119 | 14 | 22638946 | 3 | 0.21469  |
| rs2236135      | SLC7A8    | 14 | 22665561 | 4 | 3.714194 |
| rs2236135      | SLC7A8    | 14 | 22665561 | 5 | 6.481053 |
| rs17183863     | SLC7A8    | 14 | 22668816 | 8 | 7.415189 |
| rs12879346     | SLC7A8    | 14 | 22722548 | 1 | 0.439628 |
| rs12879346     | SLC7A8    | 14 | 22722548 | 6 | 0.977278 |
| rs2231301      | BCL2L2    | 14 | 22846939 | 1 | 5.3634   |
| rs2239579      | PABPN1    | 14 | 22859899 | 1 | 3.787398 |
| rs2239579      | PABPN1    | 14 | 22859899 | 6 | 0.188452 |
| rs4671         | EFS       | 14 | 22895553 | 5 | 7.227642 |
| rs4671         | EFS       | 14 | 22895553 | 1 | 0.399769 |
| rs4671         | EFS       | 14 | 22895553 | 6 | 0.034915 |
| rs4671         | EFS       | 14 | 22895553 | 2 | 6.979807 |
| SNP14-22899004 | EFS       | 14 | 22899004 | 5 | 0.157508 |
| rs4553531      | IL25      | 14 | 22914819 | 2 | 0.595446 |
| rs4553531      | IL25      | 14 | 22914819 | 3 | 0.771768 |
| rs723840       | CMTM5     | 14 | 22918151 | 1 | 1.096478 |
| rs723840       | CMTM5     | 14 | 22918151 | 7 | 0.253766 |
| rs8004990      | MYH6      | 14 | 22923995 | 7 | 4.610616 |
| rs2277474      | MYH6      | 14 | 22944363 | 6 | 0.549814 |

|                |           |    |          |   |          |
|----------------|-----------|----|----------|---|----------|
| rs2277474      | MYH6      | 14 | 22944363 | 7 | 1.321665 |
| rs2069540      | MYH7      | 14 | 22972593 | 3 | 0.820283 |
| rs45566639     | MYH7      | 14 | 22973296 | 3 | 0.223612 |
| rs4982766      | ZFH2      | 14 | 23064357 | 8 | 4.160561 |
| rs4982766      | ZFH2      | 14 | 23064357 | 2 | 2.481086 |
| rs4982766      | ZFH2      | 14 | 23064357 | 3 | 0.675955 |
| rs45484702     | LRRC16B   | 14 | 23596046 | 5 | 0.05375  |
| rs45484702     | LRRC16B   | 14 | 23596046 | 8 | 0.713157 |
| rs4982853      | C14orf121 | 14 | 23597060 | 1 | 0.88856  |
| rs1951634      | PCK2      | 14 | 23639574 | 8 | 3.511334 |
| rs1951634      | PCK2      | 14 | 23639574 | 6 | 3.677072 |
| rs927493       | RNF31     | 14 | 23686623 | 8 | 0.236362 |
| rs4761         | REC8      | 14 | 23711366 | 3 | 0.506998 |
| rs4761         | REC8      | 14 | 23711366 | 2 | 3.589772 |
| rs4761         | REC8      | 14 | 23711366 | 4 | 0.048913 |
| rs11547058     | REC8      | 14 | 23712188 | 8 | 1.240398 |
| rs11547058     | REC8      | 14 | 23712188 | 5 | 0.056345 |
| rs1885711      | REC8      | 14 | 23717654 | 4 | 0.826541 |
| rs1885711      | REC8      | 14 | 23717654 | 5 | 0.79673  |
| rs1885711      | REC8      | 14 | 23717654 | 2 | 2.47538  |
| rs1885711      | REC8      | 14 | 23717654 | 3 | 0.798574 |
| rs7146310      | IPO4      | 14 | 23723794 | 3 | 0.038624 |
| rs7146310      | IPO4      | 14 | 23723794 | 8 | 0.799698 |
| rs7146310      | IPO4      | 14 | 23723794 | 7 | 3.111247 |
| SNP14-23732017 | TM9SF1    | 14 | 23732017 | 8 | 11.45759 |
| SNP14-23732017 | TM9SF1    | 14 | 23732017 | 7 | 0.227631 |
| rs2295322      | CHMP4A    | 14 | 23749717 | 2 | 0.016521 |
| rs2295322      | CHMP4A    | 14 | 23749717 | 4 | 0.527022 |
| rs2295322      | CHMP4A    | 14 | 23749717 | 1 | 0.411278 |
| rs2295322      | CHMP4A    | 14 | 23749717 | 3 | 0.503367 |
| rs17794752     | GM2R      | 14 | 23771545 | 8 | 1.619165 |
| rs17794752     | GM2R      | 14 | 23771545 | 7 | 3.434433 |
| rs10134537     | DHRS1     | 14 | 23830604 | 1 | 4.920663 |
| rs10134537     | DHRS1     | 14 | 23830604 | 8 | 8.317803 |
| rs12892419     | DHRS1     | 14 | 23838374 | 7 | 1.058167 |
| rs12892419     | DHRS1     | 14 | 23838374 | 3 | 3.617568 |
| rs12892419     | DHRS1     | 14 | 23838374 | 5 | 0.334178 |
| rs12892419     | DHRS1     | 14 | 23838374 | 1 | 3.718895 |
| rs12892419     | DHRS1     | 14 | 23838374 | 4 | 0.974294 |
| rs3181385      | ADCY4     | 14 | 23857428 | 1 | 1.32648  |
| rs3181385      | ADCY4     | 14 | 23857428 | 8 | 2.033548 |
| rs2228233      | NFATC4    | 14 | 23909005 | 7 | 1.70715  |
| rs2228233      | NFATC4    | 14 | 23909005 | 1 | 2.933811 |
| rs2228233      | NFATC4    | 14 | 23909005 | 3 | 1.574549 |
| rs10143703     | CBLN3     | 14 | 23968195 | 5 | 0.989036 |
| rs10143703     | CBLN3     | 14 | 23968195 | 1 | 0.410642 |
| rs3742520      | KIAA0323  | 14 | 23971089 | 6 | 0.256079 |

|                |          |    |          |   |          |
|----------------|----------|----|----------|---|----------|
| rs17795094     | KIAA0323 | 14 | 23971273 | 2 | 0.386785 |
| rs17795094     | KIAA0323 | 14 | 23971273 | 5 | 0.44844  |
| rs17795094     | KIAA0323 | 14 | 23971273 | 1 | 0.201827 |
| rs17103743     | KIAA0323 | 14 | 23977392 | 8 | 6.68389  |
| rs10083379     | KIAA0323 | 14 | 23977902 | 8 | 0.632742 |
| rs10083368     | KIAA0323 | 14 | 23978024 | 8 | 0.464313 |
| SNP14-23979202 | KIAA0323 | 14 | 23979202 | 3 | 0.127838 |
| SNP14-23979202 | KIAA0323 | 14 | 23979202 | 8 | 0.39033  |
| rs5247         | CMA1     | 14 | 24046414 | 5 | 0.444578 |
| rs8192917      | GZMB     | 14 | 24172000 | 7 | 0.73535  |
| rs8192917      | GZMB     | 14 | 24172000 | 4 | 1.204911 |
| rs2273843      | GZMB     | 14 | 24173249 | 7 | 1.907842 |
| rs2273844      | GZMB     | 14 | 24173254 | 1 | 3.652525 |
| rs2273844      | GZMB     | 14 | 24173254 | 4 | 0.098422 |
| rs2273844      | GZMB     | 14 | 24173254 | 7 | 0.055212 |
| rs3088325      | STXBP6   | 14 | 24351522 | 5 | 0.265035 |
| rs1045644      | COCH     | 14 | 30424847 | 7 | 1.119433 |
| rs1045644      | COCH     | 14 | 30424847 | 1 | 0.387293 |
| rs1045644      | COCH     | 14 | 30424847 | 4 | 0.064382 |
| rs1045644      | COCH     | 14 | 30424847 | 3 | 0.801186 |
| rs13122        | COCH     | 14 | 30428775 | 3 | 0.519513 |
| rs13122        | COCH     | 14 | 30428775 | 6 | 0.984682 |
| rs13122        | COCH     | 14 | 30428775 | 4 | 1.723034 |
| rs13122        | COCH     | 14 | 30428775 | 5 | 0.303193 |
| rs13122        | COCH     | 14 | 30428775 | 1 | 5.22498  |
| SNP14-32085148 | AKAP6    | 14 | 32085148 | 7 | 1.070158 |
| SNP14-32085148 | AKAP6    | 14 | 32085148 | 3 | 0.475072 |
| SNP14-32085148 | AKAP6    | 14 | 32085148 | 4 | 4.17875  |
| SNP14-32361334 | AKAP6    | 14 | 32361334 | 5 | 0.232071 |
| rs1051695      | AKAP6    | 14 | 32362873 | 8 | 3.916476 |
| rs1051695      | AKAP6    | 14 | 32362873 | 7 | 0.874023 |
| rs1051695      | AKAP6    | 14 | 32362873 | 2 | 0.437375 |
| rs1051695      | AKAP6    | 14 | 32362873 | 1 | 0.69968  |
| rs1051695      | AKAP6    | 14 | 32362873 | 6 | 4.898959 |
| rs1051695      | AKAP6    | 14 | 32362873 | 4 | 1.202435 |
| SNP14-34300731 | BAZ1A    | 14 | 34300731 | 4 | 0.230413 |
| GA029775       | SRP54    | 14 | 34568194 | 3 | 1.653727 |
| GA029775       | SRP54    | 14 | 34568194 | 6 | 2.101037 |
| GA029775       | SRP54    | 14 | 34568194 | 4 | 6.684024 |
| GA029775       | SRP54    | 14 | 34568194 | 5 | 1.550568 |
| rs1957106      | NFKBIA   | 14 | 34943521 | 4 | 6.791818 |
| rs1957106      | NFKBIA   | 14 | 34943521 | 2 | 8.402355 |
| rs1957106      | NFKBIA   | 14 | 34943521 | 6 | 2.242593 |
| rs1957106      | NFKBIA   | 14 | 34943521 | 3 | 0.52667  |
| rs1957106      | NFKBIA   | 14 | 34943521 | 5 | 1.468514 |
| rs1952391      | INSM2    | 14 | 35073060 | 2 | 2.719641 |
| rs1952391      | INSM2    | 14 | 35073060 | 7 | 1.450697 |

|                |           |    |          |   |          |
|----------------|-----------|----|----------|---|----------|
| rs2296919      | INSM2     | 14 | 35075410 | 2 | 3.787097 |
| rs2274068      | GARNL1    | 14 | 35222928 | 7 | 1.436239 |
| rs2274068      | GARNL1    | 14 | 35222928 | 2 | 2.739684 |
| rs2296168      | GARNL1    | 14 | 35260781 | 7 | 0.038271 |
| rs2296168      | GARNL1    | 14 | 35260781 | 6 | 0.074878 |
| rs2296168      | GARNL1    | 14 | 35260781 | 1 | 3.713897 |
| rs107196       | LOC644616 | 14 | 35593849 | 5 | 0.925208 |
| rs4900833      | MBIP      | 14 | 35838027 | 5 | 7.884751 |
| SNP14-35859480 | MBIP      | 14 | 35859480 | 5 | 1.071122 |
| SNP14-35859526 | MBIP      | 14 | 35859526 | 5 | 6.632892 |
| rs17105087     | SLC25A21  | 14 | 36250436 | 3 | 0.137732 |
| rs8019549      | MIPOL1    | 14 | 36766730 | 2 | 5.659211 |
| rs8019549      | MIPOL1    | 14 | 36766730 | 5 | 4.955666 |
| rs7144658      | FOXA1     | 14 | 37131493 | 3 | 1.422702 |
| rs7144658      | FOXA1     | 14 | 37131493 | 6 | 0.703446 |
| rs7144658      | FOXA1     | 14 | 37131493 | 2 | 1.030323 |
| rs7144658      | FOXA1     | 14 | 37131493 | 5 | 0.608479 |
| rs7144658      | FOXA1     | 14 | 37131493 | 1 | 1.714796 |
| rs7144658      | FOXA1     | 14 | 37131493 | 7 | 1.676908 |
| rs9805910      | TTC6      | 14 | 37335825 | 3 | 1.881157 |
| rs9805910      | TTC6      | 14 | 37335825 | 4 | 0.51411  |
| rs9805910      | TTC6      | 14 | 37335825 | 7 | 0.251407 |
| rs9805910      | TTC6      | 14 | 37335825 | 6 | 0.736166 |
| rs9805910      | TTC6      | 14 | 37335825 | 2 | 3.065567 |
| rs2228497      | SSTR1     | 14 | 37749224 | 1 | 0.159516 |
| rs2228497      | SSTR1     | 14 | 37749224 | 5 | 1.180231 |
| rs2228497      | SSTR1     | 14 | 37749224 | 7 | 1.122524 |
| rs12889916     | SSTR1     | 14 | 37749831 | 1 | 1.197166 |
| rs12889916     | SSTR1     | 14 | 37749831 | 7 | 0.018756 |
| rs4143959      | SSTR1     | 14 | 37751020 | 7 | 0.099361 |
| rs11558739     | PNN       | 14 | 38718380 | 5 | 0.513838 |
| rs2180792      | PNN       | 14 | 38719985 | 2 | 0.608356 |
| rs2180792      | PNN       | 14 | 38719985 | 3 | 0.025839 |
| rs1050136      | PNN       | 14 | 38720575 | 2 | 3.845852 |
| rs3825549      | MIA2      | 14 | 38786559 | 3 | 0.026809 |
| rs8015094      | LOC729153 | 14 | 38913781 | 5 | 0.117392 |
| rs8015094      | LOC729153 | 14 | 38913781 | 1 | 0.479057 |
| rs8015094      | LOC729153 | 14 | 38913781 | 3 | 1.392083 |
| rs8005625      | LOC390472 | 14 | 43080539 | 2 | 0.005218 |
| rs2282279      | LOC729165 | 14 | 44017747 | 2 | 2.991495 |
| rs2282279      | LOC729165 | 14 | 44017747 | 6 | 1.388631 |
| rs2282279      | LOC729165 | 14 | 44017747 | 3 | 2.792137 |
| rs392559       | LOC729165 | 14 | 44017794 | 3 | 2.272062 |
| rs392559       | LOC729165 | 14 | 44017794 | 5 | 2.156857 |
| rs392559       | LOC729165 | 14 | 44017794 | 2 | 2.609132 |
| rs9635162      | LOC729165 | 14 | 44019556 | 2 | 0.061596 |
| rs9635162      | LOC729165 | 14 | 44019556 | 4 | 0.476303 |

|                |           |    |          |   |          |
|----------------|-----------|----|----------|---|----------|
| rs3825632      | FSCB      | 14 | 44044672 | 1 | 1.197935 |
| rs3825632      | FSCB      | 14 | 44044672 | 5 | 0.21196  |
| rs3825632      | FSCB      | 14 | 44044672 | 3 | 0.209185 |
| rs11629125     | FSCB      | 14 | 44045991 | 4 | 0.264561 |
| rs11629125     | FSCB      | 14 | 44045991 | 6 | 0.584524 |
| rs1367580      | FANCM     | 14 | 44714339 | 8 | 4.882224 |
| SNP14-44770159 | C14orf106 | 14 | 44770159 | 5 | 0.920946 |
| SNP14-44770159 | C14orf106 | 14 | 44770159 | 7 | 0.283629 |
| SNP14-44781066 | C14orf106 | 14 | 44781066 | 5 | 0.158559 |
| rs17121605     | PPIL5     | 14 | 49143872 | 5 | 0.07509  |
| rs7519         | MGAT2     | 14 | 49157503 | 6 | 0.584765 |
| rs3218791      | POLE2     | 14 | 49201596 | 5 | 0.904189 |
| rs17252094     | LOC283551 | 14 | 49518469 | 4 | 1.42694  |
| rs17252094     | LOC283551 | 14 | 49518469 | 2 | 4.399399 |
| rs17252094     | LOC283551 | 14 | 49518469 | 1 | 2.038717 |
| rs17252094     | LOC283551 | 14 | 49518469 | 8 | 1.884982 |
| rs6572635      | LOC283551 | 14 | 49542155 | 5 | 0.313278 |
| rs6572635      | LOC283551 | 14 | 49542155 | 3 | 1.078965 |
| rs6572635      | LOC283551 | 14 | 49542155 | 6 | 1.151218 |
| rs6572635      | LOC283551 | 14 | 49542155 | 4 | 0.664634 |
| rs6572635      | LOC283551 | 14 | 49542155 | 7 | 4.179314 |
| rs10150798     | C14orf138 | 14 | 49645589 | 1 | 4.351309 |
| SNP14-49725057 | SOS2      | 14 | 49725057 | 5 | 0.6615   |
| rs2275591      | L2HGDH    | 14 | 49848566 | 1 | 3.771721 |
| rs2275591      | L2HGDH    | 14 | 49848566 | 7 | 0.163952 |
| rs2275591      | L2HGDH    | 14 | 49848566 | 6 | 1.031541 |
| rs2275591      | L2HGDH    | 14 | 49848566 | 5 | 0.830286 |
| rs8017316      | ATP5S     | 14 | 49859328 | 7 | 0.086102 |
| rs8017316      | ATP5S     | 14 | 49859328 | 5 | 0.758927 |
| rs8017316      | ATP5S     | 14 | 49859328 | 1 | 6.842886 |
| rs8017316      | ATP5S     | 14 | 49859328 | 6 | 1.739741 |
| rs11376        | NIN       | 14 | 50274746 | 4 | 0.752919 |
| rs11376        | NIN       | 14 | 50274746 | 8 | 0.491162 |
| rs11376        | NIN       | 14 | 50274746 | 7 | 0.458655 |
| rs17793018     | NIN       | 14 | 50307451 | 4 | 1.134155 |
| rs17793018     | NIN       | 14 | 50307451 | 2 | 0.500965 |
| rs17793018     | NIN       | 14 | 50307451 | 1 | 0.636346 |
| rs2297893      | ABHD12B   | 14 | 50422358 | 4 | 0.677308 |
| rs4901065      | ABHD12B   | 14 | 50440871 | 3 | 1.148262 |
| rs4901065      | ABHD12B   | 14 | 50440871 | 7 | 2.06417  |
| rs11157780     | ABHD12B   | 14 | 50440880 | 7 | 3.241086 |
| rs11157780     | ABHD12B   | 14 | 50440880 | 6 | 0.246171 |
| rs11157780     | ABHD12B   | 14 | 50440880 | 3 | 1.148304 |
| rs11157781     | ABHD12B   | 14 | 50440900 | 3 | 0.033096 |
| rs11157781     | ABHD12B   | 14 | 50440900 | 6 | 0.159992 |
| rs11157781     | ABHD12B   | 14 | 50440900 | 7 | 2.575977 |
| rs7159068      | ABHD12B   | 14 | 50441151 | 7 | 1.343335 |

|            |           |    |          |   |          |
|------------|-----------|----|----------|---|----------|
| rs11157782 | ABHD12B   | 14 | 50441274 | 7 | 2.398268 |
| rs11157782 | ABHD12B   | 14 | 50441274 | 6 | 6.578443 |
| rs11157782 | ABHD12B   | 14 | 50441274 | 3 | 0.976132 |
| rs2075643  | PYGL      | 14 | 50453182 | 6 | 6.622677 |
| rs2075643  | PYGL      | 14 | 50453182 | 3 | 0.113017 |
| rs1049371  | TRIM9     | 14 | 50512420 | 4 | 4.984565 |
| rs883690   | TRIM9     | 14 | 50513110 | 5 | 0.637392 |
| rs883690   | TRIM9     | 14 | 50513110 | 4 | 1.064594 |
| rs2275462  | TRIM9     | 14 | 50515966 | 3 | 1.011092 |
| rs2275462  | TRIM9     | 14 | 50515966 | 5 | 0.386861 |
| rs2275462  | TRIM9     | 14 | 50515966 | 8 | 3.532393 |
| rs2275462  | TRIM9     | 14 | 50515966 | 4 | 0.830301 |
| rs3813398  | TRIM9     | 14 | 50533573 | 8 | 0.96964  |
| rs12883270 | TRIM9     | 14 | 50533833 | 4 | 0.911249 |
| rs1057804  | GNG2      | 14 | 51503805 | 3 | 0.408742 |
| rs1057804  | GNG2      | 14 | 51503805 | 5 | 0.487343 |
| rs3825596  | GNG2      | 14 | 51504633 | 2 | 4.518676 |
| rs3825596  | GNG2      | 14 | 51504633 | 4 | 0.651811 |
| rs3825596  | GNG2      | 14 | 51504633 | 7 | 1.310556 |
| rs3204006  | GNG2      | 14 | 51504796 | 3 | 0.514318 |
| rs1540703  | GNG2      | 14 | 51505245 | 3 | 0.063765 |
| rs1051069  | NID2      | 14 | 51548065 | 3 | 0.709891 |
| rs1051069  | NID2      | 14 | 51548065 | 6 | 7.978908 |
| rs1051069  | NID2      | 14 | 51548065 | 4 | 2.074053 |
| rs1051069  | NID2      | 14 | 51548065 | 5 | 0.016789 |
| rs946615   | NID2      | 14 | 51551667 | 4 | 0.876776 |
| rs946615   | NID2      | 14 | 51551667 | 3 | 0.527648 |
| rs946615   | NID2      | 14 | 51551667 | 2 | 3.205388 |
| rs946615   | NID2      | 14 | 51551667 | 6 | 0.062336 |
| rs12887495 | NID2      | 14 | 51566025 | 7 | 0.268817 |
| rs3742536  | NID2      | 14 | 51577179 | 7 | 3.628362 |
| rs3742536  | NID2      | 14 | 51577179 | 2 | 1.194973 |
| rs3920038  | NID2      | 14 | 51605398 | 7 | 0.247449 |
| rs17125273 | PTGDR     | 14 | 51811396 | 3 | 1.469974 |
| rs802986   | PTGDR     | 14 | 51812464 | 8 | 0.498094 |
| rs802986   | PTGDR     | 14 | 51812464 | 7 | 1.267317 |
| rs1042618  | PTGER2    | 14 | 51864850 | 3 | 0.132502 |
| rs2767540  | TXNDC16   | 14 | 51968417 | 5 | 6.09373  |
| rs2767540  | TXNDC16   | 14 | 51968417 | 7 | 0.804654 |
| rs762063   | GPR137C   | 14 | 52168652 | 2 | 5.027092 |
| rs762063   | GPR137C   | 14 | 52168652 | 4 | 0.678432 |
| rs762063   | GPR137C   | 14 | 52168652 | 5 | 4.54451  |
| rs3742532  | GPR137C   | 14 | 52172434 | 4 | 0.126572 |
| rs12885451 | GPR137C   | 14 | 52173306 | 4 | 0.564408 |
| rs1957844  | LOC645560 | 14 | 53527828 | 5 | 0.529669 |
| rs7146775  | WDHD1     | 14 | 54477507 | 2 | 5.700834 |
| rs7147147  | WDHD1     | 14 | 54477694 | 2 | 1.114722 |



|                |           |    |          |   |          |
|----------------|-----------|----|----------|---|----------|
| rs15870        | DLG7      | 14 | 54689064 | 5 | 0.085368 |
| rs1045002      | FBXO34    | 14 | 54888270 | 6 | 0.089366 |
| rs1045002      | FBXO34    | 14 | 54888270 | 5 | 0.026051 |
| rs1045002      | FBXO34    | 14 | 54888270 | 8 | 5.45039  |
| rs1045002      | FBXO34    | 14 | 54888270 | 2 | 9.194036 |
| rs1572611      | KIAA0831  | 14 | 54903627 | 6 | 6.804814 |
| rs1572611      | KIAA0831  | 14 | 54903627 | 5 | 0.549171 |
| rs1572611      | KIAA0831  | 14 | 54903627 | 8 | 4.834428 |
| rs8019270      | TBPL2     | 14 | 54976925 | 6 | 0.329005 |
| rs12886220     | KTN1      | 14 | 55148492 | 5 | 0.34075  |
| rs12886220     | KTN1      | 14 | 55148492 | 7 | 0.482878 |
| rs12886220     | KTN1      | 14 | 55148492 | 8 | 0.681557 |
| rs2184557      | LOC645683 | 14 | 55302723 | 6 | 4.4547   |
| rs2184557      | LOC645683 | 14 | 55302723 | 2 | 3.843239 |
| rs2184557      | LOC645683 | 14 | 55302723 | 7 | 4.186937 |
| rs10144431     | LOC645683 | 14 | 55302822 | 7 | 3.982447 |
| rs10144431     | LOC645683 | 14 | 55302822 | 6 | 3.517999 |
| rs10144431     | LOC645683 | 14 | 55302822 | 2 | 0.835213 |
| rs1152466      | PELI2     | 14 | 55833639 | 4 | 0.799563 |
| rs3742578      | EXOC5     | 14 | 56742468 | 8 | 7.440295 |
| rs1152531      | C14orf105 | 14 | 57007877 | 6 | 0.086049 |
| rs2747106      | C14orf37  | 14 | 57540752 | 4 | 1.049845 |
| rs2747106      | C14orf37  | 14 | 57540752 | 1 | 2.480953 |
| rs2256270      | C14orf37  | 14 | 57541042 | 5 | 0.772384 |
| rs2256270      | C14orf37  | 14 | 57541042 | 3 | 0.728757 |
| rs2256270      | C14orf37  | 14 | 57541042 | 7 | 0.918305 |
| rs2256270      | C14orf37  | 14 | 57541042 | 6 | 0.244609 |
| rs2256270      | C14orf37  | 14 | 57541042 | 1 | 2.619008 |
| rs2256270      | C14orf37  | 14 | 57541042 | 4 | 0.56073  |
| rs2295139      | C14orf37  | 14 | 57541108 | 7 | 0.470147 |
| rs2295139      | C14orf37  | 14 | 57541108 | 8 | 0.449012 |
| rs2295139      | C14orf37  | 14 | 57541108 | 3 | 0.642215 |
| SNP14-57674796 | C14orf37  | 14 | 57674796 | 6 | 3.156384 |
| rs3829765      | C14orf37  | 14 | 57675543 | 4 | 0.696128 |
| rs17832998     | DACT1     | 14 | 58182485 | 5 | 1.380757 |
| SNP14-58183183 | DACT1     | 14 | 58183183 | 1 | 1.130531 |
| rs17833004     | DACT1     | 14 | 58184200 | 2 | 1.670135 |
| rs11541        | DACT1     | 14 | 58184523 | 2 | 1.662322 |
| rs11541        | DACT1     | 14 | 58184523 | 8 | 1.052125 |
| rs11541        | DACT1     | 14 | 58184523 | 1 | 0.535613 |
| rs167437       | C14orf135 | 14 | 59661640 | 7 | 0.253596 |
| rs409866       | DHRS7     | 14 | 59681281 | 7 | 0.756212 |
| rs409866       | DHRS7     | 14 | 59681281 | 5 | 1.725141 |
| rs381839       | DHRS7     | 14 | 59681428 | 7 | 6.694275 |
| rs381839       | DHRS7     | 14 | 59681428 | 5 | 0.285238 |
| rs4899016      | SIX4      | 14 | 60248662 | 1 | 4.900934 |
| rs4899016      | SIX4      | 14 | 60248662 | 5 | 0.570288 |

|                |          |    |          |   |          |
|----------------|----------|----|----------|---|----------|
| rs4899016      | SIX4     | 14 | 60248662 | 4 | 0.038583 |
| rs698028       | FLJ22447 | 14 | 61190328 | 5 | 1.291478 |
| rs698028       | FLJ22447 | 14 | 61190328 | 7 | 0.827199 |
| rs698027       | FLJ22447 | 14 | 61190520 | 7 | 1.716163 |
| rs698027       | FLJ22447 | 14 | 61190520 | 5 | 0.27185  |
| rs698027       | FLJ22447 | 14 | 61190520 | 3 | 1.353872 |
| rs1255720      | PPP2R5E  | 14 | 63079274 | 3 | 1.119191 |
| rs1255720      | PPP2R5E  | 14 | 63079274 | 7 | 0.761485 |
| rs1255720      | PPP2R5E  | 14 | 63079274 | 6 | 0.736041 |
| rs1255720      | PPP2R5E  | 14 | 63079274 | 4 | 4.386169 |
| rs10498511     | WDR89    | 14 | 63178291 | 8 | 2.013678 |
| SNP14-63607251 | SYNE2    | 14 | 63607251 | 4 | 0.575895 |
| SNP14-63629844 | SYNE2    | 14 | 63629844 | 5 | 0.326584 |
| SNP14-63629844 | SYNE2    | 14 | 63629844 | 1 | 1.848725 |
| SNP14-63682611 | SYNE2    | 14 | 63682611 | 4 | 0.993805 |
| SNP14-63682611 | SYNE2    | 14 | 63682611 | 6 | 0.595176 |
| SNP14-63682611 | SYNE2    | 14 | 63682611 | 7 | 0.798405 |
| rs1152582      | SYNE2    | 14 | 63762383 | 7 | 0.791034 |
| rs1152582      | SYNE2    | 14 | 63762383 | 1 | 4.15738  |
| rs1152582      | SYNE2    | 14 | 63762383 | 4 | 5.192139 |
| rs1255998      | ESR2     | 14 | 63763624 | 4 | 0.191866 |
| rs8018687      | ESR2     | 14 | 63763835 | 7 | 0.461925 |
| rs8018687      | ESR2     | 14 | 63763835 | 4 | 2.958327 |
| rs8018687      | ESR2     | 14 | 63763835 | 8 | 1.338924 |
| rs4986938      | ESR2     | 14 | 63769569 | 1 | 5.229449 |
| rs4986938      | ESR2     | 14 | 63769569 | 3 | 0.053303 |
| rs1256049      | ESR2     | 14 | 63793804 | 8 | 1.072619 |
| rs2230491      | AKAP5    | 14 | 64005164 | 6 | 5.639208 |
| SNP14-64058583 | ZBTB1    | 14 | 64058583 | 2 | 5.525948 |
| rs12385918     | ZBTB1    | 14 | 64069698 | 6 | 8.598892 |
| rs12385918     | ZBTB1    | 14 | 64069698 | 3 | 1.39753  |
| rs12385910     | ZBTB1    | 14 | 64069723 | 6 | 1.35404  |
| rs12385910     | ZBTB1    | 14 | 64069723 | 3 | 0.094158 |
| rs12385910     | ZBTB1    | 14 | 64069723 | 8 | 0.496267 |
| rs229624       | PLEKHG3  | 14 | 64267520 | 7 | 0.740473 |
| rs229624       | PLEKHG3  | 14 | 64267520 | 1 | 0.084316 |
| rs229624       | PLEKHG3  | 14 | 64267520 | 8 | 1.5558   |
| rs229624       | PLEKHG3  | 14 | 64267520 | 6 | 0.532387 |
| SNP14-64279620 | PLEKHG3  | 14 | 64279620 | 1 | 4.940516 |
| SNP14-64279620 | PLEKHG3  | 14 | 64279620 | 7 | 0.192648 |
| rs17180132     | PLEKHG3  | 14 | 64279662 | 5 | 3.153471 |
| rs1695769      | SPTB     | 14 | 64284918 | 6 | 0.177952 |
| rs1695769      | SPTB     | 14 | 64284918 | 7 | 0.41543  |
| rs1695769      | SPTB     | 14 | 64284918 | 1 | 4.70406  |
| rs229592       | SPTB     | 14 | 64310981 | 6 | 0.686061 |
| rs229592       | SPTB     | 14 | 64310981 | 8 | 0.703677 |
| rs229592       | SPTB     | 14 | 64310981 | 7 | 1.101584 |

|                |          |    |          |   |          |
|----------------|----------|----|----------|---|----------|
| rs229592       | SPTB     | 14 | 64310981 | 1 | 2.867394 |
| rs229592       | SPTB     | 14 | 64310981 | 5 | 2.611756 |
| rs184528       | SPTB     | 14 | 64311797 | 7 | 0.404819 |
| rs184528       | SPTB     | 14 | 64311797 | 1 | 0.029431 |
| rs184528       | SPTB     | 14 | 64311797 | 5 | 0.291233 |
| rs1741488      | SPTB     | 14 | 64315709 | 8 | 5.011017 |
| rs1741488      | SPTB     | 14 | 64315709 | 7 | 1.730265 |
| rs1626923      | SPTB     | 14 | 64316376 | 5 | 0.070895 |
| SNP14-64322985 | SPTB     | 14 | 64322985 | 5 | 0.805339 |
| SNP14-64322985 | SPTB     | 14 | 64322985 | 7 | 2.68872  |
| rs11623956     | SPTB     | 14 | 64340144 | 6 | 2.934212 |
| rs6745         | CHURC1   | 14 | 64471448 | 8 | 3.527235 |
| rs6745         | CHURC1   | 14 | 64471448 | 1 | 3.915419 |
| rs6745         | CHURC1   | 14 | 64471448 | 7 | 2.768294 |
| rs6745         | CHURC1   | 14 | 64471448 | 5 | 2.342251 |
| rs2296326      | RAB15    | 14 | 64484125 | 2 | 5.04202  |
| rs2296326      | RAB15    | 14 | 64484125 | 7 | 5.119547 |
| rs2296326      | RAB15    | 14 | 64484125 | 8 | 1.276437 |
| rs7159443      | MAX      | 14 | 64620569 | 2 | 6.788877 |
| rs7159443      | MAX      | 14 | 64620569 | 1 | 0.046328 |
| rs2411822      | FUT8     | 14 | 64948148 | 2 | 5.364166 |
| rs1054218      | FUT8     | 14 | 65278943 | 2 | 7.023215 |
| rs1054218      | FUT8     | 14 | 65278943 | 5 | 0.161849 |
| rs1054218      | FUT8     | 14 | 65278943 | 4 | 1.151267 |
| rs1054218      | FUT8     | 14 | 65278943 | 8 | 7.044234 |
| rs1054218      | FUT8     | 14 | 65278943 | 3 | 0.224609 |
| rs1055136      | MGC88374 | 14 | 66034953 | 2 | 0.566721 |
| rs1055136      | MGC88374 | 14 | 66034953 | 1 | 0.443365 |
| rs928553       | GPHN     | 14 | 66044227 | 4 | 0.568134 |
| rs928553       | GPHN     | 14 | 66044227 | 7 | 0.310304 |
| rs11158655     | FAM71D   | 14 | 66741454 | 4 | 0.240821 |
| rs35236021     | FAM71D   | 14 | 66744674 | 2 | 1.552649 |
| rs10141879     | FAM71D   | 14 | 66764943 | 4 | 0.511109 |
| rs10141879     | FAM71D   | 14 | 66764943 | 7 | 0.649235 |
| rs13379210     | C14orf83 | 14 | 66990924 | 3 | 1.733184 |
| rs3825723      | PLEKHH1  | 14 | 67093887 | 3 | 1.284015 |
| rs3825723      | PLEKHH1  | 14 | 67093887 | 7 | 0.610602 |
| rs3825723      | PLEKHH1  | 14 | 67093887 | 6 | 0.558187 |
| rs3825723      | PLEKHH1  | 14 | 67093887 | 5 | 1.118039 |
| rs2236235      | PLEKHH1  | 14 | 67099066 | 7 | 1.651672 |
| rs2236235      | PLEKHH1  | 14 | 67099066 | 5 | 0.022951 |
| rs2236235      | PLEKHH1  | 14 | 67099066 | 3 | 0.321731 |
| rs2236235      | PLEKHH1  | 14 | 67099066 | 6 | 1.453149 |
| rs1885043      | PLEKHH1  | 14 | 67099139 | 2 | 3.791292 |
| rs734028       | PLEKHH1  | 14 | 67123555 | 1 | 5.694604 |
| rs734028       | PLEKHH1  | 14 | 67123555 | 6 | 0.740711 |
| rs734028       | PLEKHH1  | 14 | 67123555 | 8 | 0.328248 |

|                |           |    |          |   |          |
|----------------|-----------|----|----------|---|----------|
| rs4902496      | PLEKHH1   | 14 | 67125366 | 2 | 3.586927 |
| rs4902496      | PLEKHH1   | 14 | 67125366 | 4 | 0.531613 |
| rs8005363      | PIGH      | 14 | 67126143 | 1 | 5.47629  |
| rs8005363      | PIGH      | 14 | 67126143 | 8 | 0.516901 |
| rs7160492      | LOC729868 | 14 | 67150294 | 7 | 0.732931 |
| rs2235967      | ZFYVE26   | 14 | 67319252 | 8 | 4.758334 |
| rs2235967      | ZFYVE26   | 14 | 67319252 | 6 | 2.989634 |
| rs2235967      | ZFYVE26   | 14 | 67319252 | 1 | 1.033406 |
| rs2235967      | ZFYVE26   | 14 | 67319252 | 2 | 1.404613 |
| rs2235967      | ZFYVE26   | 14 | 67319252 | 4 | 1.309326 |
| rs2235967      | ZFYVE26   | 14 | 67319252 | 3 | 0.643496 |
| rs8016546      | GALNTL1   | 14 | 68890167 | 1 | 5.387475 |
| rs8016546      | GALNTL1   | 14 | 68890167 | 4 | 0.138722 |
| rs2296724      | GALNTL1   | 14 | 68890699 | 6 | 0.347022 |
| rs2296724      | GALNTL1   | 14 | 68890699 | 4 | 4.012472 |
| rs2296724      | GALNTL1   | 14 | 68890699 | 1 | 3.551497 |
| SNP14-68989764 | SLC39A9   | 14 | 68989764 | 2 | 5.224622 |
| rs7494244      | C14orf162 | 14 | 69107364 | 3 | 0.146103 |
| rs7494244      | C14orf162 | 14 | 69107364 | 1 | 2.904285 |
| rs7494244      | C14orf162 | 14 | 69107364 | 6 | 1.22715  |
| rs945310       | KIAA0247  | 14 | 69248090 | 3 | 0.404958 |
| rs945310       | KIAA0247  | 14 | 69248090 | 2 | 0.581299 |
| rs945310       | KIAA0247  | 14 | 69248090 | 1 | 0.33686  |
| rs3809396      | KIAA0247  | 14 | 69248188 | 3 | 0.085687 |
| rs4646285      | SLC10A1   | 14 | 69333401 | 6 | 5.360028 |
| rs4646285      | SLC10A1   | 14 | 69333401 | 4 | 0.722424 |
| rs3742909      | SMOC1     | 14 | 69488634 | 6 | 2.14086  |
| rs184477       | SLC8A3    | 14 | 69580879 | 5 | 0.533257 |
| rs184477       | SLC8A3    | 14 | 69580879 | 1 | 4.43417  |
| rs3809401      | SLC8A3    | 14 | 69581159 | 5 | 1.026144 |
| rs3809401      | SLC8A3    | 14 | 69581159 | 4 | 2.325215 |
| SNP14-70207597 | TTC9      | 14 | 70207597 | 8 | 0.883901 |
| rs2074647      | RGS6      | 14 | 72098931 | 7 | 0.008185 |
| rs11846274     | DPF3      | 14 | 72146069 | 7 | 1.137828 |
| rs3742836      | DPF3      | 14 | 72289773 | 7 | 0.112402 |
| rs3742836      | DPF3      | 14 | 72289773 | 4 | 0.830012 |
| rs3742836      | DPF3      | 14 | 72289773 | 8 | 0.454527 |
| rs3742836      | DPF3      | 14 | 72289773 | 3 | 0.558463 |
| rs3742836      | DPF3      | 14 | 72289773 | 5 | 0.25017  |
| rs3742836      | DPF3      | 14 | 72289773 | 1 | 1.901806 |
| rs2098322      | LOC729953 | 14 | 72463037 | 6 | 2.8284   |
| rs2098322      | LOC729953 | 14 | 72463037 | 3 | 2.05594  |
| rs2302588      | WDR21A    | 14 | 72474505 | 7 | 1.644877 |
| rs2302588      | WDR21A    | 14 | 72474505 | 4 | 0.399891 |
| rs3815460      | WDR21A    | 14 | 72492012 | 4 | 0.104298 |
| rs3815460      | WDR21A    | 14 | 72492012 | 7 | 12.91307 |
| rs17569391     | WDR21A    | 14 | 72495820 | 1 | 6.766825 |

|            |           |    |          |   |          |
|------------|-----------|----|----------|---|----------|
| rs17569391 | WDR21A    | 14 | 72495820 | 6 | 4.67945  |
| rs2286838  | ZFYVE1    | 14 | 72518336 | 4 | 0.50484  |
| rs2286838  | ZFYVE1    | 14 | 72518336 | 7 | 0.609815 |
| rs2280792  | PAPLN     | 14 | 72781147 | 1 | 0.109245 |
| rs2280792  | PAPLN     | 14 | 72781147 | 3 | 2.375273 |
| rs932256   | PAPLN     | 14 | 72810402 | 6 | 5.108368 |
| rs17781919 | NUMB      | 14 | 72813211 | 4 | 0.5628   |
| rs1074501  | HEATR4    | 14 | 73059612 | 7 | 3.147924 |
| rs1074501  | HEATR4    | 14 | 73059612 | 5 | 2.725566 |
| rs1074501  | HEATR4    | 14 | 73059612 | 3 | 2.071595 |
| rs12891009 | ACOT6     | 14 | 73153599 | 8 | 0.784182 |
| rs8003105  | DNAL1     | 14 | 73232598 | 7 | 0.209319 |
| rs8003105  | DNAL1     | 14 | 73232598 | 4 | 0.025474 |
| rs17782124 | C14orf43  | 14 | 73273542 | 3 | 0.791787 |
| rs17782128 | C14orf43  | 14 | 73275631 | 3 | 0.252915 |
| rs758774   | C14orf43  | 14 | 73276234 | 6 | 5.998736 |
| rs758774   | C14orf43  | 14 | 73276234 | 3 | 0.183155 |
| rs758773   | C14orf43  | 14 | 73276411 | 3 | 0.129716 |
| rs8020630  | ZADH1     | 14 | 73388426 | 4 | 1.735647 |
| rs8020630  | ZADH1     | 14 | 73388426 | 3 | 1.58257  |
| rs8020630  | ZADH1     | 14 | 73388426 | 5 | 2.608824 |
| rs8020630  | ZADH1     | 14 | 73388426 | 2 | 3.229301 |
| rs8020267  | ZADH1     | 14 | 73388467 | 1 | 3.937674 |
| rs8020267  | ZADH1     | 14 | 73388467 | 6 | 0.6833   |
| rs2270073  | ZADH1     | 14 | 73388507 | 4 | 1.327783 |
| rs2270073  | ZADH1     | 14 | 73388507 | 5 | 1.296812 |
| rs2270073  | ZADH1     | 14 | 73388507 | 3 | 1.359738 |
| rs8020523  | ZADH1     | 14 | 73388539 | 6 | 9.387188 |
| rs3177095  | ZNF410    | 14 | 73458661 | 4 | 0.333616 |
| rs3177095  | ZNF410    | 14 | 73458661 | 3 | 0.63348  |
| rs8500     | COQ6      | 14 | 73498198 | 4 | 6.632945 |
| rs13743    | ENTPD5    | 14 | 73503305 | 3 | 0.151173 |
| rs13743    | ENTPD5    | 14 | 73503305 | 2 | 6.357908 |
| rs2074932  | ENTPD5    | 14 | 73511437 | 4 | 0.104853 |
| rs2074932  | ENTPD5    | 14 | 73511437 | 5 | 0.66334  |
| rs2074932  | ENTPD5    | 14 | 73511437 | 6 | 0.239732 |
| rs2302117  | ENTPD5    | 14 | 73524566 | 2 | 5.169408 |
| rs2302117  | ENTPD5    | 14 | 73524566 | 4 | 1.779194 |
| rs2006731  | LIN52     | 14 | 73621271 | 4 | 0.76975  |
| rs2006731  | LIN52     | 14 | 73621271 | 5 | 0.393064 |
| rs2006732  | LIN52     | 14 | 73621279 | 5 | 1.637997 |
| rs2006732  | LIN52     | 14 | 73621279 | 4 | 1.041656 |
| rs2301345  | ABCD4     | 14 | 73836105 | 6 | 0.502321 |
| rs2301345  | ABCD4     | 14 | 73836105 | 7 | 0.491975 |
| rs2301345  | ABCD4     | 14 | 73836105 | 5 | 0.363393 |
| rs2301345  | ABCD4     | 14 | 73836105 | 3 | 0.542508 |
| rs2286425  | C14orf115 | 14 | 73884992 | 5 | 2.967544 |

|            |           |    |          |   |          |
|------------|-----------|----|----------|---|----------|
| rs2240624  | TMEM90A   | 14 | 73942679 | 3 | 0.791105 |
| rs2240624  | TMEM90A   | 14 | 73942679 | 4 | 0.831358 |
| rs2240624  | TMEM90A   | 14 | 73942679 | 6 | 1.742761 |
| rs2240623  | TMEM90A   | 14 | 73942935 | 7 | 1.455496 |
| rs2240623  | TMEM90A   | 14 | 73942935 | 4 | 0.607574 |
| rs2240623  | TMEM90A   | 14 | 73942935 | 3 | 1.678633 |
| rs2240622  | TMEM90A   | 14 | 73942959 | 4 | 3.01638  |
| rs2240622  | TMEM90A   | 14 | 73942959 | 7 | 3.378399 |
| rs2240622  | TMEM90A   | 14 | 73942959 | 8 | 1.81658  |
| rs2240622  | TMEM90A   | 14 | 73942959 | 3 | 3.06669  |
| rs2240622  | TMEM90A   | 14 | 73942959 | 6 | 2.355514 |
| rs4903221  | TMEM90A   | 14 | 73943327 | 4 | 0.587787 |
| rs4026651  | LOC729988 | 14 | 73946254 | 8 | 1.104416 |
| rs4026651  | LOC729988 | 14 | 73946254 | 6 | 0.055671 |
| rs4026651  | LOC729988 | 14 | 73946254 | 3 | 0.753328 |
| rs7145480  | LTBP2     | 14 | 74058440 | 3 | 0.5692   |
| rs699374   | LTBP2     | 14 | 74062553 | 6 | 0.240817 |
| rs699374   | LTBP2     | 14 | 74062553 | 3 | 0.449361 |
| rs699374   | LTBP2     | 14 | 74062553 | 2 | 1.462361 |
| rs2304707  | LTBP2     | 14 | 74092024 | 5 | 0.572563 |
| rs9441     | KIAA0317  | 14 | 74198178 | 2 | 2.992995 |
| rs9441     | KIAA0317  | 14 | 74198178 | 3 | 0.819019 |
| rs9441     | KIAA0317  | 14 | 74198178 | 4 | 8.446306 |
| rs2270425  | KIAA0317  | 14 | 74249487 | 2 | 3.903587 |
| rs2270425  | KIAA0317  | 14 | 74249487 | 1 | 0.243294 |
| rs2270425  | KIAA0317  | 14 | 74249487 | 8 | 0.627209 |
| rs2270425  | KIAA0317  | 14 | 74249487 | 4 | 0.501237 |
| rs2302834  | YLPM1     | 14 | 74349148 | 7 | 0.897787 |
| rs2302834  | YLPM1     | 14 | 74349148 | 3 | 0.041127 |
| rs2302834  | YLPM1     | 14 | 74349148 | 1 | 2.628467 |
| rs4140930  | DLST      | 14 | 74429423 | 4 | 3.656234 |
| rs4140930  | DLST      | 14 | 74429423 | 2 | 1.874452 |
| rs4140930  | DLST      | 14 | 74429423 | 7 | 0.225547 |
| rs4140930  | DLST      | 14 | 74429423 | 3 | 0.314995 |
| rs2286913  | RPS6KL1   | 14 | 74456329 | 2 | 2.852025 |
| rs2286913  | RPS6KL1   | 14 | 74456329 | 7 | 0.249681 |
| rs2286913  | RPS6KL1   | 14 | 74456329 | 4 | 0.046717 |
| rs2286913  | RPS6KL1   | 14 | 74456329 | 3 | 0.059344 |
| rs7156590  | RPS6KL1   | 14 | 74457936 | 2 | 2.45673  |
| rs7156590  | RPS6KL1   | 14 | 74457936 | 7 | 0.15991  |
| rs7156590  | RPS6KL1   | 14 | 74457936 | 3 | 0.858872 |
| rs7156590  | RPS6KL1   | 14 | 74457936 | 4 | 0.216554 |
| rs11159109 | RPS6KL1   | 14 | 74458827 | 2 | 4.740665 |
| rs11159109 | RPS6KL1   | 14 | 74458827 | 4 | 0.135693 |
| rs11159109 | RPS6KL1   | 14 | 74458827 | 3 | 0.310939 |
| rs12411    | PGF       | 14 | 74478796 | 1 | 6.182485 |
| rs12411    | PGF       | 14 | 74478796 | 4 | 1.91052  |

|                |            |    |          |   |          |
|----------------|------------|----|----------|---|----------|
| rs4556         | EIF2B2     | 14 | 74545824 | 7 | 7.924857 |
| rs4556         | EIF2B2     | 14 | 74545824 | 1 | 0.042577 |
| rs4556         | EIF2B2     | 14 | 74545824 | 2 | 7.630974 |
| rs4556         | EIF2B2     | 14 | 74545824 | 6 | 7.386271 |
| rs4556         | EIF2B2     | 14 | 74545824 | 3 | 0.856751 |
| rs175049       | MLH3       | 14 | 74551121 | 2 | 0.759986 |
| rs175049       | MLH3       | 14 | 74551121 | 3 | 0.548695 |
| rs175049       | MLH3       | 14 | 74551121 | 4 | 0.071657 |
| rs175049       | MLH3       | 14 | 74551121 | 1 | 0.260437 |
| rs175049       | MLH3       | 14 | 74551121 | 6 | 3.553412 |
| rs175049       | MLH3       | 14 | 74551121 | 7 | 1.326014 |
| rs108622       | MLH3       | 14 | 74551661 | 6 | 1.770848 |
| rs108622       | MLH3       | 14 | 74551661 | 3 | 1.660097 |
| rs108622       | MLH3       | 14 | 74551661 | 7 | 1.37287  |
| rs108622       | MLH3       | 14 | 74551661 | 1 | 1.282735 |
| rs108622       | MLH3       | 14 | 74551661 | 2 | 3.241708 |
| rs108622       | MLH3       | 14 | 74551661 | 4 | 2.340954 |
| SNP14-74583581 | MLH3       | 14 | 74583581 | 4 | 0.444328 |
| SNP14-74583581 | MLH3       | 14 | 74583581 | 7 | 1.462808 |
| SNP14-74583581 | MLH3       | 14 | 74583581 | 3 | 0.429368 |
| SNP14-74583581 | MLH3       | 14 | 74583581 | 6 | 0.876013 |
| SNP14-74583581 | MLH3       | 14 | 74583581 | 1 | 0.86656  |
| GA011719       | C14orf140  | 14 | 74607134 | 1 | 0.467118 |
| GA011719       | C14orf140  | 14 | 74607134 | 7 | 0.529025 |
| GA011719       | C14orf140  | 14 | 74607134 | 4 | 0.648481 |
| GA011719       | C14orf140  | 14 | 74607134 | 6 | 1.753372 |
| rs8011292      | FLVCR2     | 14 | 75115444 | 8 | 4.846465 |
| rs8011292      | FLVCR2     | 14 | 75115444 | 5 | 0.362183 |
| rs8011292      | FLVCR2     | 14 | 75115444 | 3 | 0.151668 |
| rs2287017      | FLVCR2     | 14 | 75115716 | 1 | 0.788452 |
| rs2287017      | FLVCR2     | 14 | 75115716 | 7 | 1.856179 |
| rs2287017      | FLVCR2     | 14 | 75115716 | 2 | 0.841313 |
| rs3815550      | VASH1      | 14 | 76306133 | 6 | 0.093731 |
| rs3815550      | VASH1      | 14 | 76306133 | 1 | 0.583522 |
| rs3815550      | VASH1      | 14 | 76306133 | 4 | 0.134139 |
| rs3815550      | VASH1      | 14 | 76306133 | 7 | 0.729333 |
| rs3815550      | VASH1      | 14 | 76306133 | 2 | 2.036958 |
| rs3815550      | VASH1      | 14 | 76306133 | 3 | 1.536977 |
| rs2280796      | VASH1      | 14 | 76316511 | 6 | 1.554829 |
| rs2280796      | VASH1      | 14 | 76316511 | 1 | 0.920332 |
| rs2280796      | VASH1      | 14 | 76316511 | 3 | 0.792624 |
| rs2280796      | VASH1      | 14 | 76316511 | 5 | 1.104273 |
| rs926120       | C14orf166B | 14 | 76362745 | 6 | 0.045881 |
| rs7160583      | C14orf166B | 14 | 76402161 | 3 | 1.618611 |
| rs7160583      | C14orf166B | 14 | 76402161 | 1 | 3.498107 |
| rs7160583      | C14orf166B | 14 | 76402161 | 8 | 2.169672 |
| rs7160583      | C14orf166B | 14 | 76402161 | 6 | 1.112679 |

|            |            |    |          |   |          |
|------------|------------|----|----------|---|----------|
| rs7160583  | C14orf166B | 14 | 76402161 | 7 | 2.120535 |
| rs4903543  | KIAA1737   | 14 | 76651014 | 4 | 0.122858 |
| rs4903543  | KIAA1737   | 14 | 76651014 | 6 | 0.494402 |
| rs4903543  | KIAA1737   | 14 | 76651014 | 8 | 0.287587 |
| rs4903543  | KIAA1737   | 14 | 76651014 | 7 | 4.497572 |
| rs403291   | TMEM63C    | 14 | 76772810 | 4 | 0.200193 |
| rs403291   | TMEM63C    | 14 | 76772810 | 6 | 2.983212 |
| rs403291   | TMEM63C    | 14 | 76772810 | 1 | 4.800579 |
| rs429443   | TMEM63C    | 14 | 76793012 | 1 | 1.540852 |
| rs429443   | TMEM63C    | 14 | 76793012 | 4 | 0.309729 |
| rs429443   | TMEM63C    | 14 | 76793012 | 2 | 2.216375 |
| rs429443   | TMEM63C    | 14 | 76793012 | 3 | 1.333342 |
| rs429443   | TMEM63C    | 14 | 76793012 | 7 | 1.437966 |
| rs384492   | TMEM63C    | 14 | 76793223 | 3 | 2.488468 |
| rs384492   | TMEM63C    | 14 | 76793223 | 1 | 0.763548 |
| rs3813539  | TMEM63C    | 14 | 76793979 | 1 | 3.313688 |
| rs2270421  | POMT2      | 14 | 76856841 | 1 | 4.807322 |
| rs2270421  | POMT2      | 14 | 76856841 | 4 | 0.704665 |
| rs2270421  | POMT2      | 14 | 76856841 | 3 | 4.470926 |
| rs8177538  | GSTZ1      | 14 | 76857459 | 3 | 0.395258 |
| rs3177427  | GSTZ1      | 14 | 76862960 | 3 | 0.314577 |
| rs3177427  | GSTZ1      | 14 | 76862960 | 1 | 4.044258 |
| rs7972     | GSTZ1      | 14 | 76862990 | 3 | 0.329296 |
| rs3742737  | TMED8      | 14 | 76913137 | 2 | 0.412408 |
| rs3742737  | TMED8      | 14 | 76913137 | 1 | 0.458097 |
| rs3742737  | TMED8      | 14 | 76913137 | 4 | 2.972102 |
| rs3742737  | TMED8      | 14 | 76913137 | 6 | 0.412623 |
| rs11844594 | C14orf174  | 14 | 76913567 | 2 | 0.021296 |
| rs11844594 | C14orf174  | 14 | 76913567 | 1 | 0.11624  |
| rs11844594 | C14orf174  | 14 | 76913567 | 3 | 0.037597 |
| rs11844594 | C14orf174  | 14 | 76913567 | 4 | 0.230795 |
| rs4903576  | C14orf174  | 14 | 76914622 | 1 | 1.24025  |
| rs4903576  | C14orf174  | 14 | 76914622 | 3 | 1.367127 |
| rs4903576  | C14orf174  | 14 | 76914622 | 4 | 0.668236 |
| rs2193595  | C14orf174  | 14 | 76914874 | 4 | 4.411928 |
| rs2193595  | C14orf174  | 14 | 76914874 | 1 | 0.541787 |
| rs2193595  | C14orf174  | 14 | 76914874 | 3 | 1.443455 |
| rs10130481 | C14orf148  | 14 | 76950058 | 6 | 0.891272 |
| rs10130481 | C14orf148  | 14 | 76950058 | 3 | 1.300212 |
| rs4223     | C14orf133  | 14 | 76963029 | 4 | 6.467381 |
| rs4223     | C14orf133  | 14 | 76963029 | 1 | 0.041265 |
| rs4223     | C14orf133  | 14 | 76963029 | 3 | 0.406316 |
| rs11539461 | AHSA1      | 14 | 77005412 | 2 | 9.175023 |
| rs11539461 | AHSA1      | 14 | 77005412 | 1 | 11.00847 |
| rs12434449 | THSD3      | 14 | 77034414 | 3 | 0.63627  |
| rs6494     | ALKBH1     | 14 | 77210108 | 3 | 0.095789 |
| rs6494     | ALKBH1     | 14 | 77210108 | 2 | 0.659102 |



|            |           |    |          |   |          |
|------------|-----------|----|----------|---|----------|
| rs6494     | ALKBH1    | 14 | 77210108 | 5 | 0.02192  |
| rs6494     | ALKBH1    | 14 | 77210108 | 6 | 0.079091 |
| rs11159286 | C14orf156 | 14 | 77244226 | 1 | 3.680067 |
| rs12879016 | NRXN3     | 14 | 79399885 | 2 | 2.610244 |
| rs12879016 | NRXN3     | 14 | 79399885 | 7 | 2.894602 |
| rs12879016 | NRXN3     | 14 | 79399885 | 5 | 0.826785 |
| rs225015   | DIO2      | 14 | 79737332 | 1 | 2.347987 |
| rs225015   | DIO2      | 14 | 79737332 | 8 | 0.057588 |
| rs225015   | DIO2      | 14 | 79737332 | 5 | 1.112286 |
| rs7140952  | DIO2      | 14 | 79738025 | 6 | 0.674325 |
| rs7140952  | DIO2      | 14 | 79738025 | 2 | 6.05896  |
| rs225014   | DIO2      | 14 | 79739333 | 8 | 0.019605 |
| rs225014   | DIO2      | 14 | 79739333 | 1 | 4.78891  |
| rs225014   | DIO2      | 14 | 79739333 | 7 | 0.828207 |
| rs225014   | DIO2      | 14 | 79739333 | 5 | 0.405819 |
| rs3783942  | TSHR      | 14 | 80644712 | 5 | 0.143452 |
| rs3783942  | TSHR      | 14 | 80644712 | 1 | 5.850596 |
| rs3783942  | TSHR      | 14 | 80644712 | 6 | 0.582121 |
| rs3783941  | TSHR      | 14 | 80644758 | 5 | 0.112515 |
| rs3783941  | TSHR      | 14 | 80644758 | 1 | 4.782716 |
| rs3783941  | TSHR      | 14 | 80644758 | 6 | 0.3945   |
| rs1991517  | TSHR      | 14 | 80680336 | 6 | 3.009447 |
| rs7144481  | TSHR      | 14 | 80680695 | 3 | 1.595233 |
| rs7144481  | TSHR      | 14 | 80680695 | 6 | 0.385478 |
| rs7144481  | TSHR      | 14 | 80680695 | 2 | 2.535677 |
| rs17630128 | TSHR      | 14 | 80680881 | 7 | 0.430241 |
| rs2288493  | TSHR      | 14 | 80681359 | 7 | 1.012291 |
| rs2288496  | TSHR      | 14 | 80681867 | 2 | 4.757827 |
| rs2288496  | TSHR      | 14 | 80681867 | 8 | 0.656469 |
| rs2288496  | TSHR      | 14 | 80681867 | 3 | 1.178693 |
| rs2288496  | TSHR      | 14 | 80681867 | 6 | 0.006632 |
| rs2288496  | TSHR      | 14 | 80681867 | 4 | 0.910067 |
| rs11159706 | LOC730034 | 14 | 85065440 | 2 | 4.534251 |
| rs11159706 | LOC730034 | 14 | 85065440 | 5 | 0.573835 |
| rs11159707 | LOC730034 | 14 | 85065552 | 5 | 0.256955 |
| rs11159707 | LOC730034 | 14 | 85065552 | 2 | 0.008041 |
| rs11159707 | LOC730034 | 14 | 85065552 | 7 | 0.722058 |
| rs17714100 | FLRT2     | 14 | 85159006 | 8 | 7.127356 |
| rs17121383 | FLRT2     | 14 | 85161663 | 8 | 0.505655 |
| rs2038494  | FLRT2     | 14 | 85161999 | 2 | 4.696458 |
| rs1042029  | GALC      | 14 | 87470239 | 7 | 0.209373 |
| rs1042029  | GALC      | 14 | 87470239 | 1 | 0.508265 |
| rs1042029  | GALC      | 14 | 87470239 | 5 | 6.116139 |
| rs398076   | GALC      | 14 | 87483964 | 5 | 0.669502 |
| rs398076   | GALC      | 14 | 87483964 | 1 | 0.119177 |
| rs17687109 | GALC      | 14 | 87499443 | 4 | 1.336131 |
| rs10139328 | GPR65     | 14 | 87541315 | 7 | 2.006789 |

|            |           |    |          |   |          |
|------------|-----------|----|----------|---|----------|
| rs10139328 | GPR65     | 14 | 87541315 | 1 | 4.141187 |
| rs10139328 | GPR65     | 14 | 87541315 | 5 | 1.729903 |
| rs6574978  | GPR65     | 14 | 87547166 | 5 | 2.158692 |
| rs6574978  | GPR65     | 14 | 87547166 | 1 | 3.22317  |
| rs17762463 | KCNK10    | 14 | 87721715 | 8 | 2.445846 |
| rs2277524  | KCNK10    | 14 | 87763478 | 5 | 1.351555 |
| rs2277524  | KCNK10    | 14 | 87763478 | 4 | 1.526537 |
| rs9026     | C14orf143 | 14 | 89333253 | 3 | 1.110729 |
| rs8778     | C14orf143 | 14 | 89468660 | 6 | 1.339463 |
| rs12147332 | KCNK13    | 14 | 89721110 | 7 | 1.741177 |
| rs12147332 | KCNK13    | 14 | 89721110 | 3 | 1.088091 |
| rs3742671  | C14orf102 | 14 | 89826513 | 2 | 7.10777  |
| rs3179089  | CALM1     | 14 | 89943165 | 7 | 0.568235 |
| rs3179089  | CALM1     | 14 | 89943165 | 3 | 0.129319 |
| rs3179089  | CALM1     | 14 | 89943165 | 8 | 6.115819 |
| rs3179089  | CALM1     | 14 | 89943165 | 6 | 0.985879 |
| rs3179089  | CALM1     | 14 | 89943165 | 5 | 0.030977 |
| rs3742660  | TTC7B     | 14 | 90193328 | 5 | 0.392418 |
| rs3742660  | TTC7B     | 14 | 90193328 | 3 | 0.077785 |
| rs1285859  | C14orf159 | 14 | 90761107 | 7 | 0.013107 |
| rs6562     | C14orf159 | 14 | 90761224 | 7 | 0.264491 |
| rs12891713 | CCDC88C   | 14 | 90830275 | 1 | 3.703616 |
| rs12891713 | CCDC88C   | 14 | 90830275 | 5 | 4.60389  |
| rs1970912  | CCDC88C   | 14 | 90843321 | 5 | 0.361509 |
| rs1970912  | CCDC88C   | 14 | 90843321 | 1 | 0.533252 |
| rs1970912  | CCDC88C   | 14 | 90843321 | 6 | 0.046189 |
| rs1970912  | CCDC88C   | 14 | 90843321 | 3 | 1.089368 |
| rs1970912  | CCDC88C   | 14 | 90843321 | 7 | 1.075701 |
| rs2430347  | FBLN5     | 14 | 91417433 | 1 | 4.187016 |
| rs2430347  | FBLN5     | 14 | 91417433 | 4 | 0.359339 |
| rs17127898 | TRIP11    | 14 | 91575668 | 8 | 0.119329 |
| rs13350    | NDUFB1    | 14 | 91652225 | 1 | 1.919125 |
| rs13350    | NDUFB1    | 14 | 91652225 | 5 | 0.518733 |
| rs4900131  | SLC24A4   | 14 | 92029901 | 4 | 0.068072 |
| rs12888354 | SLC24A4   | 14 | 92029925 | 5 | 0.074835 |
| rs12888354 | SLC24A4   | 14 | 92029925 | 3 | 0.031534 |
| rs4900132  | SLC24A4   | 14 | 92029991 | 5 | 0.996391 |
| rs4900132  | SLC24A4   | 14 | 92029991 | 1 | 0.86269  |
| rs3814830  | RIN3      | 14 | 92187951 | 3 | 0.635054 |
| rs9791     | LGMN      | 14 | 92240746 | 8 | 1.39443  |
| rs9791     | LGMN      | 14 | 92240746 | 1 | 0.352369 |
| rs729940   | CHGA      | 14 | 92468854 | 7 | 0.179453 |
| rs941581   | CHGA      | 14 | 92470931 | 1 | 0.296359 |
| rs941581   | CHGA      | 14 | 92470931 | 6 | 3.228117 |
| rs941581   | CHGA      | 14 | 92470931 | 4 | 0.15206  |
| rs941581   | CHGA      | 14 | 92470931 | 7 | 0.269726 |
| rs941581   | CHGA      | 14 | 92470931 | 8 | 4.324055 |

|                |           |    |          |   |          |
|----------------|-----------|----|----------|---|----------|
| rs8017818      | MOAP1     | 14 | 92720807 | 6 | 1.252483 |
| rs8017818      | MOAP1     | 14 | 92720807 | 4 | 0.515658 |
| rs8008104      | PRIMA1    | 14 | 93256125 | 1 | 1.798373 |
| rs8008104      | PRIMA1    | 14 | 93256125 | 4 | 1.686438 |
| rs1887197      | PRIMA1    | 14 | 93257585 | 2 | 3.240656 |
| rs1887197      | PRIMA1    | 14 | 93257585 | 3 | 0.261915 |
| rs7147919      | ASB2      | 14 | 93487174 | 4 | 2.024799 |
| SNP14-93487284 | ASB2      | 14 | 93487284 | 1 | 1.513468 |
| rs4277287      | ASB2      | 14 | 93487294 | 5 | 0.395246 |
| rs4277287      | ASB2      | 14 | 93487294 | 4 | 0.867974 |
| rs4483793      | ASB2      | 14 | 93487339 | 4 | 1.99102  |
| rs10142728     | C14orf48  | 14 | 93534242 | 3 | 0.194935 |
| rs2273226      | OTUB2     | 14 | 93580717 | 1 | 0.173417 |
| rs2273226      | OTUB2     | 14 | 93580717 | 7 | 0.313188 |
| rs2273226      | OTUB2     | 14 | 93580717 | 8 | 0.596271 |
| rs1950643      | KIAA1622  | 14 | 93815323 | 6 | 1.723708 |
| rs1950643      | KIAA1622  | 14 | 93815323 | 8 | 0.955418 |
| rs941591       | SERPINA10 | 14 | 93826503 | 6 | 0.856151 |
| rs941590       | SERPINA10 | 14 | 93826547 | 3 | 1.78319  |
| rs941590       | SERPINA10 | 14 | 93826547 | 5 | 2.015664 |
| rs941590       | SERPINA10 | 14 | 93826547 | 7 | 1.107108 |
| SNP14-93845974 | SERPINA6  | 14 | 93845974 | 6 | 1.34889  |
| SNP14-93845974 | SERPINA6  | 14 | 93845974 | 7 | 0.488916 |
| SNP14-93845974 | SERPINA6  | 14 | 93845974 | 5 | 2.612686 |
| SNP14-93845974 | SERPINA6  | 14 | 93845974 | 3 | 2.168865 |
| SNP14-93845974 | SERPINA6  | 14 | 93845974 | 2 | 1.919059 |
| rs4592582      | SERPINA2  | 14 | 93902549 | 2 | 0.105528 |
| rs1243166      | SERPINA2  | 14 | 93913571 | 3 | 1.041115 |
| rs1243166      | SERPINA2  | 14 | 93913571 | 1 | 6.049724 |
| rs1243163      | SERPINA1  | 14 | 93914459 | 8 | 2.601376 |
| rs1243163      | SERPINA1  | 14 | 93914459 | 5 | 2.09938  |
| rs12888805     | SERPINA11 | 14 | 93982552 | 1 | 0.425718 |
| rs12888805     | SERPINA11 | 14 | 93982552 | 2 | 1.745474 |
| rs12888805     | SERPINA11 | 14 | 93982552 | 3 | 0.244438 |
| SNP14-93982649 | SERPINA11 | 14 | 93982649 | 7 | 0.721428 |
| SNP14-93982649 | SERPINA11 | 14 | 93982649 | 5 | 1.090514 |
| SNP14-94003393 | SERPINA9  | 14 | 94003393 | 7 | 0.255613 |
| SNP14-94003393 | SERPINA9  | 14 | 94003393 | 1 | 1.751449 |
| rs12879019     | SERPINA9  | 14 | 94005654 | 6 | 3.56623  |
| rs5508         | SERPINA4  | 14 | 94099605 | 4 | 0.370918 |
| rs5508         | SERPINA4  | 14 | 94099605 | 5 | 0.562397 |
| rs5510         | SERPINA4  | 14 | 94103109 | 6 | 0.763161 |
| rs6118         | SERPINA5  | 14 | 94123616 | 6 | 2.88603  |
| SNP14-94123643 | SERPINA5  | 14 | 94123643 | 1 | 4.380231 |
| SNP14-94123643 | SERPINA5  | 14 | 94123643 | 8 | 2.705608 |
| SNP14-94123643 | SERPINA5  | 14 | 94123643 | 5 | 0.038341 |
| rs6108         | SERPINA5  | 14 | 94128384 | 8 | 3.65E-06 |

|                |           |    |          |   |          |
|----------------|-----------|----|----------|---|----------|
| rs6108         | SERPINA5  | 14 | 94128384 | 7 | 0.359862 |
| rs6108         | SERPINA5  | 14 | 94128384 | 5 | 0.270505 |
| rs6108         | SERPINA5  | 14 | 94128384 | 6 | 8.407777 |
| rs6108         | SERPINA5  | 14 | 94128384 | 1 | 4.365543 |
| rs12885659     | LOC390503 | 14 | 94170528 | 1 | 0.115746 |
| rs17826595     | SERPINA13 | 14 | 94179586 | 7 | 0.030736 |
| rs17826595     | SERPINA13 | 14 | 94179586 | 4 | 0.105926 |
| rs13078        | DICER1    | 14 | 94626500 | 5 | 8.168851 |
| rs13078        | DICER1    | 14 | 94626500 | 2 | 5.81606  |
| rs13078        | DICER1    | 14 | 94626500 | 3 | 0.364007 |
| rs3742345      | C14orf139 | 14 | 94945095 | 6 | 0.571699 |
| rs3742343      | C14orf139 | 14 | 94946140 | 5 | 0.876883 |
| rs12434757     | C14orf49  | 14 | 94954076 | 6 | 0.856808 |
| rs12434757     | C14orf49  | 14 | 94954076 | 1 | 0.445601 |
| rs12434757     | C14orf49  | 14 | 94954076 | 2 | 0.781953 |
| rs12434757     | C14orf49  | 14 | 94954076 | 3 | 0.564659 |
| rs9671369      | C14orf49  | 14 | 94976074 | 8 | 1.137364 |
| rs9671369      | C14orf49  | 14 | 94976074 | 6 | 0.227328 |
| rs9671369      | C14orf49  | 14 | 94976074 | 3 | 1.198625 |
| rs9919918      | C14orf49  | 14 | 94980686 | 4 | 1.41499  |
| rs9919918      | C14orf49  | 14 | 94980686 | 6 | 0.831405 |
| rs9919918      | C14orf49  | 14 | 94980686 | 1 | 3.322095 |
| rs9919918      | C14orf49  | 14 | 94980686 | 3 | 0.588234 |
| rs4905318      | C14orf49  | 14 | 94988378 | 7 | 0.882601 |
| rs4905318      | C14orf49  | 14 | 94988378 | 6 | 2.922405 |
| rs4905318      | C14orf49  | 14 | 94988378 | 3 | 0.370728 |
| rs4905318      | C14orf49  | 14 | 94988378 | 5 | 0.737476 |
| rs4905318      | C14orf49  | 14 | 94988378 | 8 | 2.354778 |
| rs2024863      | C14orf49  | 14 | 94993423 | 7 | 0.829215 |
| rs2024863      | C14orf49  | 14 | 94993423 | 3 | 1.201484 |
| rs2024863      | C14orf49  | 14 | 94993423 | 4 | 1.308188 |
| rs2024863      | C14orf49  | 14 | 94993423 | 6 | 3.548605 |
| rs2024863      | C14orf49  | 14 | 94993423 | 8 | 6.18978  |
| rs2024863      | C14orf49  | 14 | 94993423 | 5 | 2.101225 |
| rs6575536      | TCL6      | 14 | 95187492 | 1 | 1.372815 |
| rs8018690      | TCL6      | 14 | 95187537 | 6 | 0.719945 |
| rs8018690      | TCL6      | 14 | 95187537 | 1 | 0.309568 |
| rs9591         | TCL6      | 14 | 95205284 | 5 | 1.689089 |
| SNP14-95227432 | TCL1B     | 14 | 95227432 | 8 | 2.917584 |
| SNP14-95227432 | TCL1B     | 14 | 95227432 | 5 | 2.399825 |
| SNP14-95227432 | TCL1B     | 14 | 95227432 | 1 | 3.989578 |
| SNP14-95227432 | TCL1B     | 14 | 95227432 | 4 | 3.012628 |
| rs3208738      | C14orf132 | 14 | 95625170 | 6 | 0.112188 |
| rs3208738      | C14orf132 | 14 | 95625170 | 7 | 5.422697 |
| rs3742480      | C14orf132 | 14 | 95626021 | 7 | 0.962611 |
| rs3742480      | C14orf132 | 14 | 95626021 | 6 | 0.495817 |
| rs3809416      | C14orf132 | 14 | 95627626 | 3 | 0.732119 |

|                |           |    |           |   |          |
|----------------|-----------|----|-----------|---|----------|
| rs3809416      | C14orf132 | 14 | 95627626  | 5 | 0.105845 |
| rs1062709      | C14orf132 | 14 | 95628302  | 7 | 0.180875 |
| rs1062709      | C14orf132 | 14 | 95628302  | 5 | 1.855657 |
| rs1062709      | C14orf132 | 14 | 95628302  | 3 | 0.53114  |
| rs2146934      | C14orf132 | 14 | 95628634  | 6 | 0.89575  |
| rs2146934      | C14orf132 | 14 | 95628634  | 7 | 1.128322 |
| rs1062710      | C14orf132 | 14 | 95629212  | 7 | 1.177571 |
| rs1062710      | C14orf132 | 14 | 95629212  | 6 | 0.467    |
| rs10082        | C14orf132 | 14 | 95629544  | 6 | 2.372526 |
| rs10082        | C14orf132 | 14 | 95629544  | 5 | 1.611182 |
| rs10082        | C14orf132 | 14 | 95629544  | 7 | 1.915791 |
| rs10752        | C14orf132 | 14 | 95629836  | 7 | 0.873962 |
| rs10752        | C14orf132 | 14 | 95629836  | 5 | 1.043959 |
| rs5224         | BDKRB2    | 14 | 95777210  | 2 | 1.443989 |
| rs5224         | BDKRB2    | 14 | 95777210  | 6 | 0.689848 |
| rs5225         | BDKRB2    | 14 | 95777976  | 7 | 0.769837 |
| rs2069589      | BDKRB2    | 14 | 95778469  | 7 | 5.843275 |
| rs2069589      | BDKRB2    | 14 | 95778469  | 3 | 1.281393 |
| rs2069590      | BDKRB2    | 14 | 95778535  | 3 | 0.524886 |
| rs2069590      | BDKRB2    | 14 | 95778535  | 5 | 0.042977 |
| rs2069590      | BDKRB2    | 14 | 95778535  | 4 | 0.896269 |
| rs2069591      | BDKRB2    | 14 | 95778585  | 3 | 1.05925  |
| rs2069591      | BDKRB2    | 14 | 95778585  | 7 | 1.103169 |
| rs2069592      | BDKRB2    | 14 | 95778601  | 3 | 1.912564 |
| rs2069592      | BDKRB2    | 14 | 95778601  | 7 | 0.978593 |
| rs2071084      | BDKRB1    | 14 | 95799895  | 2 | 2.994261 |
| rs2369679      | AK7       | 14 | 95992505  | 7 | 0.447172 |
| rs2369679      | AK7       | 14 | 95992505  | 1 | 6.049146 |
| rs7160148      | LOC730202 | 14 | 96038357  | 7 | 1.362828 |
| rs11160553     | EML1      | 14 | 99401629  | 4 | 0.16525  |
| rs11160553     | EML1      | 14 | 99401629  | 7 | 0.525264 |
| rs2250718      | EML1      | 14 | 99450701  | 3 | 0.161613 |
| rs2250718      | EML1      | 14 | 99450701  | 8 | 0.257923 |
| rs2250718      | EML1      | 14 | 99450701  | 1 | 4.369869 |
| rs1044631      | EML1      | 14 | 99477134  | 3 | 0.115519 |
| rs1044631      | EML1      | 14 | 99477134  | 8 | 4.667554 |
| rs2236317      | DEGS2     | 14 | 99682846  | 8 | 5.929688 |
| rs2236317      | DEGS2     | 14 | 99682846  | 6 | 7.649096 |
| SNP14-99864892 | C14orf68  | 14 | 99864892  | 5 | 1.180423 |
| rs2234519      | WARS      | 14 | 99911648  | 7 | 0.767797 |
| rs12893951     | BEGAIN    | 14 | 100074968 | 3 | 0.757457 |
| rs12893951     | BEGAIN    | 14 | 100074968 | 1 | 0.762039 |
| rs12893951     | BEGAIN    | 14 | 100074968 | 6 | 1.698763 |
| rs12892787     | C14orf70  | 14 | 100208760 | 4 | 0.793938 |
| rs1802710      | DLK1      | 14 | 100270398 | 6 | 1.613068 |
| rs1802710      | DLK1      | 14 | 100270398 | 8 | 4.468732 |
| rs1802710      | DLK1      | 14 | 100270398 | 7 | 1.538976 |

|                |           |    |           |   |          |
|----------------|-----------|----|-----------|---|----------|
| rs941575       | MEG3      | 14 | 100365583 | 8 | 3.8554   |
| rs3825569      | RTL1      | 14 | 100420051 | 5 | 0.629424 |
| rs3809403      | FLJ41170  | 14 | 100542369 | 6 | 0.927399 |
| rs8011440      | LOC730241 | 14 | 101094911 | 7 | 1.731757 |
| rs945006       | DIO3      | 14 | 101099030 | 3 | 1.160898 |
| rs945006       | DIO3      | 14 | 101099030 | 5 | 0.020555 |
| rs8005905      | HSP90AA1  | 14 | 101638120 | 7 | 1.313536 |
| SNP14-10186238 | C14orf131 | 14 | 101862384 | 7 | 0.487002 |
| SNP14-10186238 | C14orf131 | 14 | 101862384 | 1 | 5.513414 |
| rs17100874     | KIAA0329  | 14 | 101912810 | 5 | 7.213415 |
| SNP14-10197095 | KIAA0329  | 14 | 101970954 | 3 | 0.121788 |
| rs17100923     | KIAA0329  | 14 | 101979744 | 7 | 0.599093 |
| GA011875       | KIAA0329  | 14 | 102034407 | 3 | 0.35471  |
| GA011875       | KIAA0329  | 14 | 102034407 | 8 | 6.737414 |
| GA011875       | KIAA0329  | 14 | 102034407 | 2 | 1.966705 |
| GA011875       | KIAA0329  | 14 | 102034407 | 4 | 0.238267 |
| rs2273905      | ANKRD9    | 14 | 102044752 | 3 | 0.017141 |
| rs2273905      | ANKRD9    | 14 | 102044752 | 4 | 0.303794 |
| rs2273905      | ANKRD9    | 14 | 102044752 | 8 | 2.347075 |
| rs2273905      | ANKRD9    | 14 | 102044752 | 2 | 4.192043 |
| rs1131877      | TRAF3     | 14 | 102411802 | 4 | 0.259367 |
| rs1131877      | TRAF3     | 14 | 102411802 | 3 | 0.424468 |
| rs1131877      | TRAF3     | 14 | 102411802 | 8 | 0.317828 |
| rs1190233      | AMN       | 14 | 102466808 | 8 | 4.534729 |
| rs1190233      | AMN       | 14 | 102466808 | 3 | 0.589258 |
| rs1190233      | AMN       | 14 | 102466808 | 6 | 1.085085 |
| rs8009219      | CDC42BPB  | 14 | 102510226 | 3 | 0.647695 |
| rs8009219      | CDC42BPB  | 14 | 102510226 | 7 | 0.762581 |
| rs35954043     | CDC42BPB  | 14 | 102535801 | 8 | 3.593104 |
| rs729185       | C14orf73  | 14 | 102646148 | 4 | 0.026964 |
| rs3870         | C14orf73  | 14 | 102646528 | 4 | 0.242814 |
| rs3178152      | TNFAIP2   | 14 | 102663703 | 8 | 0.345353 |
| rs3178152      | TNFAIP2   | 14 | 102663703 | 2 | 0.584785 |
| rs3178152      | TNFAIP2   | 14 | 102663703 | 3 | 0.316692 |
| rs3178152      | TNFAIP2   | 14 | 102663703 | 6 | 0.939152 |
| rs3178152      | TNFAIP2   | 14 | 102663703 | 7 | 5.797685 |
| rs1052912      | TNFAIP2   | 14 | 102673406 | 3 | 0.055795 |
| rs1052912      | TNFAIP2   | 14 | 102673406 | 4 | 0.049835 |
| rs1052912      | TNFAIP2   | 14 | 102673406 | 5 | 5.614944 |
| rs7161305      | C14orf172 | 14 | 103071987 | 3 | 0.354952 |
| rs7161305      | C14orf172 | 14 | 103071987 | 4 | 6.988496 |
| rs7161305      | C14orf172 | 14 | 103071987 | 6 | 0.782234 |
| rs7148456      | BAG5      | 14 | 103098023 | 4 | 0.661963 |
| rs7148456      | BAG5      | 14 | 103098023 | 6 | 0.682731 |
| rs7148456      | BAG5      | 14 | 103098023 | 2 | 2.094054 |
| rs3212068      | LOC730176 | 14 | 103241511 | 8 | 7.576896 |
| rs3212068      | LOC730176 | 14 | 103241511 | 3 | 2.094777 |

|                |           |    |           |   |          |
|----------------|-----------|----|-----------|---|----------|
| rs17292804     | PPP1R13B  | 14 | 103274876 | 3 | 0.281099 |
| rs17292804     | PPP1R13B  | 14 | 103274876 | 2 | 3.973749 |
| rs17292804     | PPP1R13B  | 14 | 103274876 | 4 | 0.117558 |
| SNP14-10328912 | PPP1R13B  | 14 | 103289121 | 3 | 1.020131 |
| SNP14-10328912 | PPP1R13B  | 14 | 103289121 | 8 | 0.565121 |
| SNP14-10328912 | PPP1R13B  | 14 | 103289121 | 7 | 1.369514 |
| SNP14-10328912 | PPP1R13B  | 14 | 103289121 | 1 | 0.104493 |
| SNP14-10328912 | PPP1R13B  | 14 | 103289121 | 4 | 6.12831  |
| SNP14-10328912 | PPP1R13B  | 14 | 103289121 | 6 | 1.2502   |
| SNP14-10328912 | PPP1R13B  | 14 | 103289121 | 5 | 3.880781 |
| SNP14-10328912 | PPP1R13B  | 14 | 103289121 | 2 | 0.968206 |
| rs7150461      | TDRD9     | 14 | 103588206 | 2 | 1.733106 |
| rs7150461      | TDRD9     | 14 | 103588206 | 6 | 0.961086 |
| rs7150461      | TDRD9     | 14 | 103588206 | 1 | 0.31085  |
| rs1744284      | LOC374569 | 14 | 103629675 | 5 | 1.098274 |
| rs1465163      | LOC374569 | 14 | 103633685 | 3 | 0.168475 |
| rs2487305      | KIF26A    | 14 | 103711545 | 2 | 1.715684 |
| rs2487305      | KIF26A    | 14 | 103711545 | 6 | 0.6385   |
| rs1547350      | KIF26A    | 14 | 103716079 | 3 | 0.264245 |
| rs1547350      | KIF26A    | 14 | 103716079 | 7 | 0.723088 |
| rs1547350      | KIF26A    | 14 | 103716079 | 5 | 0.047762 |
| rs1547350      | KIF26A    | 14 | 103716079 | 4 | 0.143412 |
| rs947000       | KIF26A    | 14 | 103716470 | 5 | 0.115273 |
| rs947000       | KIF26A    | 14 | 103716470 | 2 | 2.702455 |
| rs947000       | KIF26A    | 14 | 103716470 | 3 | 1.258568 |
| rs947000       | KIF26A    | 14 | 103716470 | 6 | 0.601041 |
| rs947000       | KIF26A    | 14 | 103716470 | 7 | 0.404605 |
| rs10083486     | C14orf180 | 14 | 104126989 | 5 | 0.215207 |
| rs10083489     | C14orf180 | 14 | 104127004 | 5 | 0.925449 |
| rs3809461      | LOC730185 | 14 | 104129543 | 8 | 2.593107 |
| rs3809461      | LOC730185 | 14 | 104129543 | 3 | 0.274993 |
| rs3809457      | LOC730185 | 14 | 104129855 | 3 | 1.242394 |
| rs3809457      | LOC730185 | 14 | 104129855 | 5 | 0.411558 |
| SNP14-10425183 | INF2      | 14 | 104251830 | 4 | 0.739137 |
| rs10138227     | AKT1      | 14 | 104330751 | 8 | 0.982816 |
| rs41314519     | KIAA0284  | 14 | 104415868 | 6 | 7.684837 |
| rs2028414      | KIAA0284  | 14 | 104420433 | 4 | 0.219169 |
| rs2028414      | KIAA0284  | 14 | 104420433 | 7 | 0.792766 |
| rs2028414      | KIAA0284  | 14 | 104420433 | 5 | 0.331194 |
| rs45449696     | KIAA0284  | 14 | 104421223 | 3 | 0.554907 |
| rs45449696     | KIAA0284  | 14 | 104421223 | 1 | 0.854283 |
| GA011942       | KIAA0284  | 14 | 104421913 | 7 | 0.764879 |
| GA011942       | KIAA0284  | 14 | 104421913 | 1 | 1.172872 |
| rs2582548      | KIAA0284  | 14 | 104425338 | 1 | 2.552081 |
| rs2582548      | KIAA0284  | 14 | 104425338 | 5 | 0.317548 |
| rs2582548      | KIAA0284  | 14 | 104425338 | 7 | 0.868944 |
| rs752265       | KIAA0284  | 14 | 104432979 | 4 | 0.690874 |

|           |             |    |           |   |          |
|-----------|-------------|----|-----------|---|----------|
| rs752265  | KIAA0284    | 14 | 104432979 | 5 | 0.158877 |
| rs752265  | KIAA0284    | 14 | 104432979 | 1 | 3.82127  |
| rs3742935 | AHNAK2      | 14 | 104476644 | 2 | 7.381842 |
| rs3742935 | AHNAK2      | 14 | 104476644 | 8 | 6.006611 |
| rs3742935 | AHNAK2      | 14 | 104476644 | 3 | 0.35234  |
| rs3742935 | AHNAK2      | 14 | 104476644 | 7 | 1.996502 |
| rs2272591 | JAG2        | 14 | 104682327 | 4 | 4.737453 |
| rs2272591 | JAG2        | 14 | 104682327 | 8 | 8.353449 |
| rs2272591 | JAG2        | 14 | 104682327 | 6 | 5.31078  |
| rs2272591 | JAG2        | 14 | 104682327 | 1 | 5.199    |
| rs2272591 | JAG2        | 14 | 104682327 | 3 | 0.606092 |
| rs3087836 | BRF1        | 14 | 104747093 | 1 | 0.301626 |
| rs3087836 | BRF1        | 14 | 104747093 | 7 | 1.217254 |
| rs3087836 | BRF1        | 14 | 104747093 | 3 | 0.487427 |
| rs3087836 | BRF1        | 14 | 104747093 | 2 | 5.032006 |
| rs3087836 | BRF1        | 14 | 104747093 | 6 | 7.60662  |
| rs2816605 | BTBD6       | 14 | 104786560 | 3 | 0.658578 |
| rs2816605 | BTBD6       | 14 | 104786560 | 8 | 1.775791 |
| rs14592   | BTBD6       | 14 | 104788310 | 2 | 0.285986 |
| rs14592   | BTBD6       | 14 | 104788310 | 1 | 1.162716 |
| rs4983413 | MTA1        | 14 | 105001451 | 5 | 0.142957 |
| rs885883  | IGHVII-78-1 | 14 | 106345097 | 7 | 0.360432 |
| rs885883  | IGHVII-78-1 | 14 | 106345097 | 1 | 0.520944 |
| rs548     | TUBGCP5     | 15 | 20425225  | 8 | 2.863434 |
| rs7170838 | NIPA2       | 15 | 20572679  | 3 | 1.12096  |
| rs7170838 | NIPA2       | 15 | 20572679  | 7 | 3.494834 |
| rs6606820 | NIPA1       | 15 | 20597755  | 6 | 5.11087  |
| rs6606820 | NIPA1       | 15 | 20597755  | 8 | 6.905277 |
| rs6606820 | NIPA1       | 15 | 20597755  | 4 | 0.364115 |
| rs6606820 | NIPA1       | 15 | 20597755  | 2 | 6.183186 |
| rs6606820 | NIPA1       | 15 | 20597755  | 3 | 0.218624 |
| rs6606820 | NIPA1       | 15 | 20597755  | 1 | 0.556488 |
| rs1059774 | NIPA1       | 15 | 20599143  | 3 | 0.080796 |
| rs1059774 | NIPA1       | 15 | 20599143  | 4 | 0.296611 |
| rs1059774 | NIPA1       | 15 | 20599143  | 6 | 0.105762 |
| rs1059774 | NIPA1       | 15 | 20599143  | 1 | 0.063693 |
| rs1059774 | NIPA1       | 15 | 20599143  | 2 | 0.262585 |
| rs1059774 | NIPA1       | 15 | 20599143  | 8 | 0.97928  |
| rs2239669 | MKRN3       | 15 | 21362685  | 8 | 4.813231 |
| rs2239669 | MKRN3       | 15 | 21362685  | 4 | 3.243786 |
| rs9785    | MAGEL2      | 15 | 21440126  | 1 | 0.469362 |
| rs9785    | MAGEL2      | 15 | 21440126  | 6 | 0.544688 |
| rs9785    | MAGEL2      | 15 | 21440126  | 3 | 0.16304  |
| rs9785    | MAGEL2      | 15 | 21440126  | 4 | 0.18882  |
| rs3742950 | C15orf2     | 15 | 22473323  | 5 | 0.521009 |
| rs3742950 | C15orf2     | 15 | 22473323  | 1 | 0.334022 |
| rs4906743 | ATP10A      | 15 | 23473746  | 5 | 0.504863 |



|                |           |    |          |   |          |
|----------------|-----------|----|----------|---|----------|
| rs4906743      | ATP10A    | 15 | 23473746 | 2 | 3.111062 |
| rs4906743      | ATP10A    | 15 | 23473746 | 8 | 0.714049 |
| rs4906744      | ATP10A    | 15 | 23473810 | 5 | 0.276412 |
| rs2066710      | ATP10A    | 15 | 23474580 | 6 | 2.708249 |
| rs2066710      | ATP10A    | 15 | 23474580 | 3 | 1.61071  |
| rs2066710      | ATP10A    | 15 | 23474580 | 5 | 2.17195  |
| rs2066710      | ATP10A    | 15 | 23474580 | 1 | 4.657134 |
| rs2066708      | ATP10A    | 15 | 23474805 | 7 | 0.219163 |
| rs2066708      | ATP10A    | 15 | 23474805 | 5 | 0.593143 |
| rs2066708      | ATP10A    | 15 | 23474805 | 3 | 0.012273 |
| rs3816800      | ATP10A    | 15 | 23476187 | 3 | 0.738494 |
| rs3816800      | ATP10A    | 15 | 23476187 | 2 | 0.62154  |
| rs3816800      | ATP10A    | 15 | 23476187 | 7 | 7.551534 |
| rs3816800      | ATP10A    | 15 | 23476187 | 5 | 0.046307 |
| rs3816800      | ATP10A    | 15 | 23476187 | 1 | 1.334269 |
| SNP15-23477291 | ATP10A    | 15 | 23477291 | 5 | 1.458254 |
| SNP15-23477291 | ATP10A    | 15 | 23477291 | 8 | 1.96956  |
| rs2076741      | ATP10A    | 15 | 23477297 | 5 | 1.422621 |
| rs2076741      | ATP10A    | 15 | 23477297 | 8 | 0.01076  |
| rs17555920     | ATP10A    | 15 | 23504291 | 6 | 5.496567 |
| rs2066704      | ATP10A    | 15 | 23504535 | 5 | 0.334966 |
| rs17116056     | ATP10A    | 15 | 23520183 | 6 | 4.852524 |
| rs2017247      | GABRB3    | 15 | 24340255 | 3 | 1.622053 |
| rs2017247      | GABRB3    | 15 | 24340255 | 5 | 0.110544 |
| rs12595837     | LOC730017 | 15 | 24421157 | 5 | 0.272825 |
| rs12595837     | LOC730017 | 15 | 24421157 | 3 | 1.934229 |
| rs12595837     | LOC730017 | 15 | 24421157 | 6 | 0.630876 |
| rs140685       | GABRA5    | 15 | 24771205 | 8 | 4.672818 |
| rs1800407      | OCA2      | 15 | 25903913 | 5 | 1.210973 |
| rs3751555      | APBA2     | 15 | 27197365 | 4 | 3.53374  |
| SNP15-27205812 | KIAA0574  | 15 | 27205812 | 4 | 0.819845 |
| SNP15-27205812 | KIAA0574  | 15 | 27205812 | 2 | 0.402375 |
| rs798088       | LOC390561 | 15 | 28876818 | 7 | 1.992871 |
| rs798088       | LOC390561 | 15 | 28876818 | 8 | 1.060633 |
| rs798088       | LOC390561 | 15 | 28876818 | 3 | 0.203288 |
| rs798088       | LOC390561 | 15 | 28876818 | 2 | 1.519073 |
| rs798088       | LOC390561 | 15 | 28876818 | 4 | 0.621823 |
| rs1852033      | LOC390561 | 15 | 28877893 | 1 | 1.225028 |
| rs1852033      | LOC390561 | 15 | 28877893 | 7 | 0.738469 |
| rs1852033      | LOC390561 | 15 | 28877893 | 5 | 0.197651 |
| rs1852033      | LOC390561 | 15 | 28877893 | 4 | 1.251106 |
| rs1852033      | LOC390561 | 15 | 28877893 | 3 | 1.085482 |
| rs1852033      | LOC390561 | 15 | 28877893 | 8 | 0.577205 |
| rs1852033      | LOC390561 | 15 | 28877893 | 6 | 0.761015 |
| rs3512         | MTMR15    | 15 | 29022297 | 7 | 8.40815  |
| rs3512         | MTMR15    | 15 | 29022297 | 8 | 5.180155 |
| rs11629793     | MTMR10    | 15 | 29025715 | 7 | 1.013237 |

|                |           |    |          |   |          |
|----------------|-----------|----|----------|---|----------|
| rs11629793     | MTMR10    | 15 | 29025715 | 8 | 0.893976 |
| rs2949569      | MTMR10    | 15 | 29025864 | 3 | 0.984674 |
| rs2949569      | MTMR10    | 15 | 29025864 | 4 | 0.926382 |
| rs2949569      | MTMR10    | 15 | 29025864 | 1 | 4.304022 |
| rs2949569      | MTMR10    | 15 | 29025864 | 7 | 0.953006 |
| rs12898290     | TRPM1     | 15 | 29081635 | 4 | 0.614348 |
| rs1035705      | TRPM1     | 15 | 29130036 | 1 | 0.703789 |
| rs7164569      | OTUD7A    | 15 | 29581222 | 1 | 0.020059 |
| rs7164569      | OTUD7A    | 15 | 29581222 | 4 | 2.709873 |
| rs7164569      | OTUD7A    | 15 | 29581222 | 8 | 0.799154 |
| rs7164569      | OTUD7A    | 15 | 29581222 | 3 | 0.675721 |
| rs7164569      | OTUD7A    | 15 | 29581222 | 6 | 0.40584  |
| SNP15-30716916 | ARHGAP11A | 15 | 30716916 | 4 | 0.015412 |
| rs12915554     | GREM1     | 15 | 30810778 | 1 | 2.584344 |
| rs12915554     | GREM1     | 15 | 30810778 | 6 | 1.651808 |
| rs12915554     | GREM1     | 15 | 30810778 | 7 | 1.363007 |
| rs12915554     | GREM1     | 15 | 30810778 | 4 | 0.789287 |
| rs3743105      | GREM1     | 15 | 30811243 | 7 | 1.110253 |
| rs3743103      | GREM1     | 15 | 30812919 | 7 | 0.872542 |
| rs10318        | GREM1     | 15 | 30813271 | 1 | 0.276126 |
| rs10318        | GREM1     | 15 | 30813271 | 5 | 1.168943 |
| rs10318        | GREM1     | 15 | 30813271 | 2 | 1.185704 |
| rs1129456      | GREM1     | 15 | 30813959 | 5 | 0.513452 |
| rs2306277      | FMN1      | 15 | 31144554 | 4 | 0.834524 |
| rs2306277      | FMN1      | 15 | 31144554 | 3 | 0.166862 |
| rs2306277      | FMN1      | 15 | 31144554 | 6 | 0.81567  |
| rs2229116      | RYR3      | 15 | 31692702 | 3 | 1.205628 |
| rs2229116      | RYR3      | 15 | 31692702 | 6 | 1.402211 |
| rs6495228      | RYR3      | 15 | 31803566 | 4 | 1.130865 |
| rs2288613      | RYR3      | 15 | 31900302 | 6 | 0.695648 |
| rs1044129      | RYR3      | 15 | 31945558 | 6 | 2.568608 |
| rs1044129      | RYR3      | 15 | 31945558 | 8 | 0.743253 |
| rs1044129      | RYR3      | 15 | 31945558 | 7 | 0.698523 |
| rs17236798     | SLC12A6   | 15 | 32330164 | 7 | 0.259818 |
| rs17236798     | SLC12A6   | 15 | 32330164 | 4 | 0.373164 |
| rs7173         | NOLA3     | 15 | 32421312 | 4 | 0.543997 |
| rs7173         | NOLA3     | 15 | 32421312 | 1 | 2.21571  |
| rs4984215      | LOC441720 | 15 | 32453352 | 3 | 0.41014  |
| rs4984215      | LOC441720 | 15 | 32453352 | 8 | 0.321526 |
| rs7164070      | AQR       | 15 | 33049244 | 6 | 0.773398 |
| rs7164070      | AQR       | 15 | 33049244 | 5 | 3.948439 |
| rs1015943      | C15orf41  | 15 | 34889080 | 5 | 5.287947 |
| rs1015943      | C15orf41  | 15 | 34889080 | 1 | 2.396071 |
| rs12595568     | C15orf53  | 15 | 36778095 | 3 | 0.781163 |
| rs1495185      | C15orf53  | 15 | 36778728 | 2 | 1.56311  |
| rs1495185      | C15orf53  | 15 | 36778728 | 4 | 0.186326 |
| rs12916379     | C15orf53  | 15 | 36778812 | 7 | 1.662046 |

|                |           |    |          |   |          |
|----------------|-----------|----|----------|---|----------|
| rs1495187      | C15orf53  | 15 | 36778999 | 8 | 0.316303 |
| rs156783       | C15orf54  | 15 | 37332324 | 6 | 5.265903 |
| rs156783       | C15orf54  | 15 | 37332324 | 2 | 3.19308  |
| rs156783       | C15orf54  | 15 | 37332324 | 1 | 0.942254 |
| rs13329154     | C15orf54  | 15 | 37332440 | 3 | 0.967777 |
| rs17691608     | C15orf54  | 15 | 37332773 | 3 | 0.425384 |
| rs1478605      | THBS1     | 15 | 37660576 | 3 | 0.201147 |
| rs1478605      | THBS1     | 15 | 37660576 | 6 | 0.717504 |
| rs2229364      | THBS1     | 15 | 37667009 | 4 | 0.400466 |
| rs2229364      | THBS1     | 15 | 37667009 | 5 | 1.013961 |
| rs2229364      | THBS1     | 15 | 37667009 | 3 | 0.01145  |
| rs6492905      | FSIP1     | 15 | 37679694 | 8 | 0.539605 |
| rs6492905      | FSIP1     | 15 | 37679694 | 6 | 2.010491 |
| rs6492905      | FSIP1     | 15 | 37679694 | 7 | 1.073323 |
| rs12908846     | FSIP1     | 15 | 37697696 | 5 | 0.320325 |
| rs12908846     | FSIP1     | 15 | 37697696 | 4 | 0.153949 |
| rs937961       | FSIP1     | 15 | 37793064 | 2 | 6.049704 |
| rs937961       | FSIP1     | 15 | 37793064 | 6 | 3.762827 |
| rs35602605     | EIF2AK4   | 15 | 38096151 | 5 | 0.197541 |
| rs2277559      | BUB1B     | 15 | 38240599 | 2 | 1.272252 |
| rs2277559      | BUB1B     | 15 | 38240599 | 7 | 1.321953 |
| rs2277559      | BUB1B     | 15 | 38240599 | 1 | 1.020833 |
| rs2277559      | BUB1B     | 15 | 38240599 | 6 | 4.915869 |
| rs2277559      | BUB1B     | 15 | 38240599 | 4 | 2.994536 |
| rs2277559      | BUB1B     | 15 | 38240599 | 5 | 0.241586 |
| rs1801376      | BUB1B     | 15 | 38265123 | 1 | 0.831997 |
| rs34790429     | BUB1B     | 15 | 38297954 | 6 | 0.015716 |
| rs2229690      | PLCB2     | 15 | 38377426 | 5 | 0.492927 |
| rs2229690      | PLCB2     | 15 | 38377426 | 3 | 2.096575 |
| rs2229690      | PLCB2     | 15 | 38377426 | 7 | 1.392499 |
| rs28602975     | LOC390578 | 15 | 38392154 | 4 | 1.167725 |
| rs28602975     | LOC390578 | 15 | 38392154 | 1 | 1.563773 |
| rs4924454      | C15orf52  | 15 | 38412066 | 3 | 0.237993 |
| rs4924454      | C15orf52  | 15 | 38412066 | 6 | 0.070013 |
| rs4924454      | C15orf52  | 15 | 38412066 | 8 | 0.365305 |
| rs12443160     | DISP2     | 15 | 38443433 | 5 | 0.239509 |
| rs7169262      | C15orf23  | 15 | 38462785 | 6 | 5.243865 |
| SNP15-38470994 | C15orf23  | 15 | 38470994 | 6 | 0.339433 |
| rs8042729      | CCDC32    | 15 | 38632594 | 3 | 0.655922 |
| rs10152546     | CCDC32    | 15 | 38642502 | 8 | 0.100926 |
| rs10152546     | CCDC32    | 15 | 38642502 | 7 | 0.332975 |
| rs10152546     | CCDC32    | 15 | 38642502 | 3 | 0.460969 |
| rs10152546     | CCDC32    | 15 | 38642502 | 2 | 5.053995 |
| rs3803353      | CCDC32    | 15 | 38644532 | 7 | 0.650007 |
| rs7177192      | CASC5     | 15 | 38685935 | 3 | 0.024841 |
| rs33931006     | CASC5     | 15 | 38702123 | 1 | 5.430217 |
| rs2619679      | LOC729029 | 15 | 38773529 | 7 | 7.159061 |

|                |           |    |          |   |          |
|----------------|-----------|----|----------|---|----------|
| rs2619679      | LOC729029 | 15 | 38773529 | 8 | 1.198806 |
| rs2619679      | LOC729029 | 15 | 38773529 | 3 | 0.212164 |
| rs2619679      | LOC729029 | 15 | 38773529 | 2 | 2.269227 |
| rs11855560     | RAD51     | 15 | 38811595 | 3 | 1.844168 |
| rs11855560     | RAD51     | 15 | 38811595 | 7 | 1.803778 |
| rs11855560     | RAD51     | 15 | 38811595 | 2 | 1.907468 |
| rs1866170      | LOC643338 | 15 | 38850536 | 2 | 4.214548 |
| rs1866170      | LOC643338 | 15 | 38850536 | 7 | 0.03895  |
| rs1866170      | LOC643338 | 15 | 38850536 | 6 | 3.914697 |
| SNP15-38856063 | DNAJC17   | 15 | 38856063 | 2 | 3.322814 |
| SNP15-38856063 | DNAJC17   | 15 | 38856063 | 5 | 1.258693 |
| rs690347       | ZFYVE19   | 15 | 38893218 | 1 | 1.04703  |
| rs690347       | ZFYVE19   | 15 | 38893218 | 6 | 0.647403 |
| rs690347       | ZFYVE19   | 15 | 38893218 | 3 | 0.228032 |
| rs690347       | ZFYVE19   | 15 | 38893218 | 5 | 1.434461 |
| rs690136       | SPINT1    | 15 | 38935455 | 3 | 0.480729 |
| rs676180       | SPINT1    | 15 | 38937009 | 3 | 0.878746 |
| rs690733       | EXDL1     | 15 | 39263757 | 3 | 0.77692  |
| rs28493702     | CHP       | 15 | 39359994 | 8 | 3.166014 |
| GA012333       | CHP       | 15 | 39361343 | 7 | 0.314283 |
| rs12900702     | NDUFAF1   | 15 | 39466977 | 7 | 0.191085 |
| rs12900702     | NDUFAF1   | 15 | 39466977 | 5 | 4.408551 |
| rs12900702     | NDUFAF1   | 15 | 39466977 | 6 | 0.455869 |
| rs11630901     | RPAP1     | 15 | 39606659 | 7 | 1.082581 |
| rs11630901     | RPAP1     | 15 | 39606659 | 1 | 1.935141 |
| rs11630901     | RPAP1     | 15 | 39606659 | 5 | 0.234172 |
| rs2289741      | RPAP1     | 15 | 39607492 | 1 | 4.552457 |
| SNP15-39609455 | RPAP1     | 15 | 39609455 | 3 | 0.208802 |
| SNP15-39609455 | RPAP1     | 15 | 39609455 | 4 | 1.088373 |
| rs2297382      | RPAP1     | 15 | 39615049 | 4 | 0.508417 |
| rs2297382      | RPAP1     | 15 | 39615049 | 6 | 0.565374 |
| rs2297382      | RPAP1     | 15 | 39615049 | 3 | 0.044173 |
| rs2605570      | MGA       | 15 | 39846813 | 8 | 0.38372  |
| rs2605570      | MGA       | 15 | 39846813 | 7 | 7.622262 |
| rs2605570      | MGA       | 15 | 39846813 | 3 | 0.283805 |
| rs1201689      | MAPKBP1   | 15 | 39893210 | 3 | 0.003432 |
| rs1201689      | MAPKBP1   | 15 | 39893210 | 5 | 0.679591 |
| rs1201689      | MAPKBP1   | 15 | 39893210 | 2 | 5.834549 |
| rs1201689      | MAPKBP1   | 15 | 39893210 | 7 | 0.435456 |
| rs2277535      | MAPKBP1   | 15 | 39907003 | 6 | 1.404915 |
| rs2277535      | MAPKBP1   | 15 | 39907003 | 2 | 4.121285 |
| rs1672466      | PLA2G4B   | 15 | 39923280 | 3 | 0.145895 |
| rs1197669      | PLA2G4B   | 15 | 39925748 | 5 | 0.071493 |
| rs1197669      | PLA2G4B   | 15 | 39925748 | 7 | 1.302702 |
| rs1197669      | PLA2G4B   | 15 | 39925748 | 2 | 0.340464 |
| rs1197669      | PLA2G4B   | 15 | 39925748 | 3 | 0.310737 |
| SNP15-39930410 | SPTBN5    | 15 | 39930410 | 6 | 0.640962 |

|                |         |    |          |   |          |
|----------------|---------|----|----------|---|----------|
| rs1197660      | SPTBN5  | 15 | 39933228 | 7 | 0.743122 |
| rs1197660      | SPTBN5  | 15 | 39933228 | 3 | 0.487016 |
| SNP15-39936798 | SPTBN5  | 15 | 39936798 | 7 | 1.039481 |
| rs1197675      | SPTBN5  | 15 | 39936888 | 5 | 1.109972 |
| rs1197675      | SPTBN5  | 15 | 39936888 | 2 | 0.239894 |
| rs1197675      | SPTBN5  | 15 | 39936888 | 7 | 0.077755 |
| rs1197675      | SPTBN5  | 15 | 39936888 | 3 | 0.557248 |
| rs16972193     | SPTBN5  | 15 | 39942030 | 6 | 0.836583 |
| SNP15-39946582 | SPTBN5  | 15 | 39946582 | 2 | 0.252162 |
| SNP15-39946582 | SPTBN5  | 15 | 39946582 | 5 | 0.959943 |
| SNP15-39946582 | SPTBN5  | 15 | 39946582 | 3 | 0.064457 |
| rs12593397     | SPTBN5  | 15 | 39953792 | 7 | 0.532562 |
| SNP15-39955692 | SPTBN5  | 15 | 39955692 | 3 | 0.093082 |
| SNP15-39955692 | SPTBN5  | 15 | 39955692 | 5 | 2.848889 |
| SNP15-39955692 | SPTBN5  | 15 | 39955692 | 2 | 2.257282 |
| SNP15-39955692 | SPTBN5  | 15 | 39955692 | 7 | 0.343809 |
| rs12708402     | SPTBN5  | 15 | 39958754 | 1 | 1.682423 |
| rs12708402     | SPTBN5  | 15 | 39958754 | 3 | 1.0389   |
| rs12708402     | SPTBN5  | 15 | 39958754 | 2 | 1.159562 |
| rs12708402     | SPTBN5  | 15 | 39958754 | 5 | 1.078548 |
| rs1197682      | SPTBN5  | 15 | 39958775 | 4 | 1.142432 |
| SNP15-39958829 | SPTBN5  | 15 | 39958829 | 5 | 0.182134 |
| SNP15-39958829 | SPTBN5  | 15 | 39958829 | 3 | 1.008696 |
| SNP15-39958829 | SPTBN5  | 15 | 39958829 | 4 | 1.665011 |
| SNP15-39958829 | SPTBN5  | 15 | 39958829 | 8 | 0.435563 |
| rs2280016      | SPTBN5  | 15 | 39965414 | 4 | 0.206867 |
| rs1210795      | SPTBN5  | 15 | 39965447 | 4 | 0.741896 |
| rs1210795      | SPTBN5  | 15 | 39965447 | 5 | 0.474721 |
| rs1210795      | SPTBN5  | 15 | 39965447 | 3 | 0.343912 |
| rs1210795      | SPTBN5  | 15 | 39965447 | 8 | 0.644935 |
| rs1048175      | EHD4    | 15 | 39979201 | 3 | 0.217648 |
| rs1048175      | EHD4    | 15 | 39979201 | 2 | 0.390272 |
| rs1048175      | EHD4    | 15 | 39979201 | 7 | 0.441633 |
| rs1048175      | EHD4    | 15 | 39979201 | 1 | 0.232749 |
| rs11549015     | EHD4    | 15 | 40022608 | 2 | 3.144238 |
| rs11549015     | EHD4    | 15 | 40022608 | 8 | 1.105737 |
| rs1668579      | PLA2G4E | 15 | 40069011 | 8 | 1.079252 |
| rs750052       | PLA2G4D | 15 | 40148314 | 6 | 3.134202 |
| rs750052       | PLA2G4D | 15 | 40148314 | 5 | 2.557042 |
| SNP15-40150335 | PLA2G4D | 15 | 40150335 | 5 | 0.112108 |
| SNP15-40150335 | PLA2G4D | 15 | 40150335 | 6 | 0.620251 |
| rs655427       | PLA2G4F | 15 | 40221546 | 1 | 5.083475 |
| rs655427       | PLA2G4F | 15 | 40221546 | 5 | 0.197428 |
| rs655427       | PLA2G4F | 15 | 40221546 | 7 | 3.453931 |
| rs7086         | VPS39   | 15 | 40238400 | 8 | 0.609291 |
| rs8024732      | GANC    | 15 | 40358010 | 8 | 5.653877 |
| rs2578652      | GANC    | 15 | 40405823 | 2 | 2.116684 |

|            |         |    |          |   |          |
|------------|---------|----|----------|---|----------|
| rs3743006  | GANC    | 15 | 40433060 | 8 | 6.798361 |
| rs2241827  | CAPN3   | 15 | 40482236 | 5 | 0.252751 |
| rs2241827  | CAPN3   | 15 | 40482236 | 7 | 0.747674 |
| rs1062038  | ZFP106  | 15 | 40495135 | 8 | 0.191528 |
| rs10851411 | CEP27   | 15 | 40646527 | 8 | 1.561811 |
| rs10851411 | CEP27   | 15 | 40646527 | 5 | 3.403069 |
| rs6493059  | STARD9  | 15 | 40764818 | 5 | 0.576678 |
| rs6493059  | STARD9  | 15 | 40764818 | 8 | 4.265425 |
| rs8030587  | STARD9  | 15 | 40769098 | 8 | 3.385292 |
| rs8030587  | STARD9  | 15 | 40769098 | 5 | 0.800128 |
| rs1058846  | STARD9  | 15 | 40799316 | 8 | 6.072998 |
| rs1058846  | STARD9  | 15 | 40799316 | 3 | 1.042295 |
| rs1058846  | STARD9  | 15 | 40799316 | 5 | 3.53586  |
| rs9269     | STARD9  | 15 | 40799566 | 5 | 2.092478 |
| rs9269     | STARD9  | 15 | 40799566 | 8 | 6.703066 |
| rs1995939  | STARD9  | 15 | 40799809 | 8 | 6.50994  |
| rs1995939  | STARD9  | 15 | 40799809 | 5 | 2.812696 |
| rs8023524  | CDAN1   | 15 | 40808275 | 5 | 0.081778 |
| rs4265781  | CDAN1   | 15 | 40816041 | 1 | 1.077823 |
| rs4265781  | CDAN1   | 15 | 40816041 | 7 | 5.914438 |
| rs4265781  | CDAN1   | 15 | 40816041 | 5 | 0.531844 |
| rs4265781  | CDAN1   | 15 | 40816041 | 6 | 0.322805 |
| rs3742970  | LCMT2   | 15 | 41409557 | 3 | 0.51321  |
| rs560191   | TP53BP1 | 15 | 41555066 | 3 | 0.729296 |
| rs560191   | TP53BP1 | 15 | 41555066 | 2 | 1.468019 |
| rs560191   | TP53BP1 | 15 | 41555066 | 6 | 0.406997 |
| rs1060939  | MAP1A   | 15 | 41604209 | 6 | 0.910895 |
| rs12912505 | MAP1A   | 15 | 41604696 | 2 | 2.863811 |
| rs12912505 | MAP1A   | 15 | 41604696 | 6 | 0.427897 |
| rs480108   | MAP1A   | 15 | 41604698 | 2 | 2.164702 |
| rs480108   | MAP1A   | 15 | 41604698 | 6 | 0.348368 |
| rs689931   | MAP1A   | 15 | 41610120 | 5 | 0.022866 |
| rs689931   | MAP1A   | 15 | 41610120 | 8 | 0.32385  |
| rs572837   | MAP1A   | 15 | 41611105 | 6 | 1.370837 |
| rs2411284  | PDIA3   | 15 | 41826191 | 6 | 1.013347 |
| rs2411284  | PDIA3   | 15 | 41826191 | 2 | 1.580002 |
| rs678084   | WDR76   | 15 | 41907851 | 6 | 2.457306 |
| rs678084   | WDR76   | 15 | 41907851 | 2 | 2.889022 |
| rs2470911  | TRIM69  | 15 | 42834426 | 5 | 0.787712 |
| rs2470911  | TRIM69  | 15 | 42834426 | 1 | 2.427048 |
| rs2470911  | TRIM69  | 15 | 42834426 | 4 | 0.553747 |
| rs2470911  | TRIM69  | 15 | 42834426 | 3 | 0.908725 |
| rs17588988 | TRIM69  | 15 | 42834694 | 1 | 4.207644 |
| rs17588988 | TRIM69  | 15 | 42834694 | 3 | 0.808645 |
| rs17588988 | TRIM69  | 15 | 42834694 | 8 | 1.08261  |
| rs3100139  | TRIM69  | 15 | 42834865 | 4 | 0.053741 |
| rs3100139  | TRIM69  | 15 | 42834865 | 3 | 1.12307  |

|                |           |    |          |   |          |
|----------------|-----------|----|----------|---|----------|
| rs3100139      | TRIM69    | 15 | 42834865 | 1 | 2.843126 |
| rs3759880      | TRIM69    | 15 | 42835943 | 4 | 0.781196 |
| rs3759880      | TRIM69    | 15 | 42835943 | 1 | 4.841008 |
| rs3759880      | TRIM69    | 15 | 42835943 | 3 | 2.738087 |
| rs1648281      | DUOXA1    | 15 | 43209050 | 6 | 0.327844 |
| rs1648281      | DUOXA1    | 15 | 43209050 | 7 | 0.804733 |
| rs1648281      | DUOXA1    | 15 | 43209050 | 2 | 1.162214 |
| SNP15-43278428 | SHF       | 15 | 43278428 | 7 | 0.173685 |
| SNP15-43332770 | SLC28A2   | 15 | 43332770 | 1 | 0.211536 |
| SNP15-43332770 | SLC28A2   | 15 | 43332770 | 6 | 0.396412 |
| rs1049518      | GATM      | 15 | 43440659 | 8 | 1.016924 |
| rs1049518      | GATM      | 15 | 43440659 | 6 | 0.397854 |
| rs1049518      | GATM      | 15 | 43440659 | 1 | 2.976418 |
| rs17618637     | GATM      | 15 | 43440686 | 2 | 2.540613 |
| rs1288775      | GATM      | 15 | 43448970 | 7 | 1.382196 |
| rs1288775      | GATM      | 15 | 43448970 | 8 | 4.577262 |
| rs1288775      | GATM      | 15 | 43448970 | 2 | 2.661148 |
| rs1365610      | SPATA5L1  | 15 | 43481902 | 2 | 3.973813 |
| rs1365610      | SPATA5L1  | 15 | 43481902 | 7 | 3.49151  |
| rs1365610      | SPATA5L1  | 15 | 43481902 | 8 | 4.190327 |
| rs2433600      | SLC30A4   | 15 | 43563716 | 2 | 1.014843 |
| rs2433600      | SLC30A4   | 15 | 43563716 | 1 | 1.013777 |
| rs2433600      | SLC30A4   | 15 | 43563716 | 6 | 1.243026 |
| rs8042811      | C15orf21  | 15 | 43635213 | 6 | 0.167416 |
| rs8042811      | C15orf21  | 15 | 43635213 | 1 | 0.522193 |
| rs8042811      | C15orf21  | 15 | 43635213 | 2 | 0.231399 |
| rs532598       | SEMA6D    | 15 | 45845363 | 8 | 0.531114 |
| rs568215       | SEMA6D    | 15 | 45850368 | 8 | 1.578304 |
| rs11070641     | FBN1      | 15 | 46488321 | 1 | 4.318698 |
| rs11070641     | FBN1      | 15 | 46488321 | 5 | 0.924709 |
| rs8033037      | FBN1      | 15 | 46584599 | 1 | 3.677722 |
| rs8033037      | FBN1      | 15 | 46584599 | 5 | 3.577819 |
| rs8033037      | FBN1      | 15 | 46584599 | 4 | 0.327582 |
| GA030476       | DTWD1     | 15 | 47704633 | 6 | 3.084144 |
| GA030476       | DTWD1     | 15 | 47704633 | 5 | 0.436874 |
| GA030476       | DTWD1     | 15 | 47704633 | 7 | 0.202513 |
| rs10519239     | LOC645453 | 15 | 47873772 | 4 | 5.342205 |
| rs7497350      | ATP8B4    | 15 | 47938195 | 1 | 1.495095 |
| rs7497350      | ATP8B4    | 15 | 47938195 | 3 | 0.072869 |
| rs1059851      | ATP8B4    | 15 | 47938725 | 3 | 0.911099 |
| rs4494482      | ATP8B4    | 15 | 47939458 | 3 | 1.108073 |
| rs4494483      | ATP8B4    | 15 | 47939566 | 6 | 1.056252 |
| rs4494483      | ATP8B4    | 15 | 47939566 | 3 | 0.454308 |
| rs4494483      | ATP8B4    | 15 | 47939566 | 5 | 0.206707 |
| rs4494483      | ATP8B4    | 15 | 47939566 | 7 | 0.252436 |
| rs1648348      | SLC27A2   | 15 | 48262058 | 4 | 3.361045 |
| rs1648348      | SLC27A2   | 15 | 48262058 | 7 | 0.395727 |

|                |           |    |          |   |          |
|----------------|-----------|----|----------|---|----------|
| rs1648348      | SLC27A2   | 15 | 48262058 | 1 | 4.046592 |
| rs1648348      | SLC27A2   | 15 | 48262058 | 3 | 0.051307 |
| rs8034633      | SLC27A2   | 15 | 48315841 | 1 | 3.157589 |
| rs8034633      | SLC27A2   | 15 | 48315841 | 3 | 1.375132 |
| rs1549521      | HDC       | 15 | 48322124 | 1 | 2.150304 |
| rs8042919      | TRPM7     | 15 | 48665922 | 1 | 4.777518 |
| rs10046        | CYP19A1   | 15 | 49290278 | 8 | 0.250656 |
| rs898135       | GLDN      | 15 | 49485817 | 8 | 2.641265 |
| rs3751585      | DMXL2     | 15 | 49528348 | 2 | 9.246578 |
| rs3751585      | DMXL2     | 15 | 49528348 | 6 | 6.779194 |
| rs3751585      | DMXL2     | 15 | 49528348 | 1 | 0.093315 |
| rs6493514      | DMXL2     | 15 | 49702070 | 3 | 6.25574  |
| rs35664837     | SCG3      | 15 | 49771654 | 7 | 0.721447 |
| rs16964532     | TMOD2     | 15 | 49888196 | 3 | 0.704032 |
| rs2623258      | TMOD2     | 15 | 49888886 | 4 | 0.399704 |
| rs2623258      | TMOD2     | 15 | 49888886 | 2 | 5.070399 |
| rs2623258      | TMOD2     | 15 | 49888886 | 8 | 4.500912 |
| rs2623258      | TMOD2     | 15 | 49888886 | 1 | 0.018448 |
| rs16953082     | TMOD2     | 15 | 49889548 | 3 | 0.439758 |
| rs2554327      | LOC645615 | 15 | 49940470 | 4 | 4.183121 |
| rs2554327      | LOC645615 | 15 | 49940470 | 1 | 4.612637 |
| rs2554327      | LOC645615 | 15 | 49940470 | 3 | 4.302564 |
| rs2227308      | BCL2L10   | 15 | 50189243 | 1 | 5.00598  |
| rs2227308      | BCL2L10   | 15 | 50189243 | 3 | 0.404005 |
| SNP15-50192154 | BCL2L10   | 15 | 50192154 | 5 | 0.138176 |
| SNP15-50192154 | BCL2L10   | 15 | 50192154 | 7 | 0.294027 |
| SNP15-50192154 | BCL2L10   | 15 | 50192154 | 3 | 1.077285 |
| SNP15-50192154 | BCL2L10   | 15 | 50192154 | 1 | 0.651057 |
| rs12396        | GNB5      | 15 | 50200608 | 1 | 0.066868 |
| rs12396        | GNB5      | 15 | 50200608 | 2 | 0.083264 |
| rs12396        | GNB5      | 15 | 50200608 | 7 | 5.731162 |
| rs11070883     | GNB5      | 15 | 50270857 | 7 | 0.498655 |
| rs11070883     | GNB5      | 15 | 50270857 | 3 | 0.50498  |
| rs11070883     | GNB5      | 15 | 50270857 | 4 | 0.87037  |
| SNP15-50308675 | MYO5C     | 15 | 50308675 | 7 | 0.42227  |
| SNP15-50315243 | MYO5C     | 15 | 50315243 | 3 | 0.082598 |
| rs8041208      | WDR72     | 15 | 51595449 | 1 | 2.336336 |
| rs3206108      | WDR72     | 15 | 51595909 | 1 | 1.869337 |
| SNP15-51790383 | WDR72     | 15 | 51790383 | 7 | 0.488803 |
| SNP15-51790383 | WDR72     | 15 | 51790383 | 1 | 1.914343 |
| SNP15-51790383 | WDR72     | 15 | 51790383 | 3 | 0.744726 |
| rs1061823      | RAB27A    | 15 | 53283335 | 4 | 0.731802 |
| rs1061823      | RAB27A    | 15 | 53283335 | 3 | 0.109198 |
| rs1061823      | RAB27A    | 15 | 53283335 | 6 | 5.823609 |
| rs1061823      | RAB27A    | 15 | 53283335 | 1 | 5.351239 |
| rs3203152      | CCPG1     | 15 | 53451512 | 5 | 0.064885 |
| rs17819126     | DYX1C1    | 15 | 53577202 | 4 | 0.157885 |



|                |           |    |          |   |          |
|----------------|-----------|----|----------|---|----------|
| rs3743205      | DYX1C1    | 15 | 53577822 | 5 | 2.863773 |
| rs11550869     | NEDD4     | 15 | 53907424 | 4 | 0.543551 |
| rs11550869     | NEDD4     | 15 | 53907424 | 7 | 6.771495 |
| rs2899593      | NEDD4     | 15 | 53908013 | 8 | 5.246649 |
| SNP15-53995103 | NEDD4     | 15 | 53995103 | 6 | 1.160585 |
| rs8032922      | LOC729530 | 15 | 54082828 | 1 | 2.717786 |
| rs8032922      | LOC729530 | 15 | 54082828 | 4 | 1.313708 |
| rs8032922      | LOC729530 | 15 | 54082828 | 7 | 2.643753 |
| rs17819312     | LOC729530 | 15 | 54084719 | 1 | 6.407156 |
| rs2165461      | LOC145783 | 15 | 54997919 | 2 | 4.382111 |
| rs2165461      | LOC145783 | 15 | 54997919 | 7 | 0.415485 |
| rs2165461      | LOC145783 | 15 | 54997919 | 4 | 0.788749 |
| rs2165461      | LOC145783 | 15 | 54997919 | 5 | 1.143269 |
| rs12442879     | TCF12     | 15 | 55312274 | 7 | 0.221628 |
| rs734101       | LOC283663 | 15 | 55385763 | 4 | 1.196179 |
| SNP15-55518865 | CGNL1     | 15 | 55518865 | 8 | 0.308993 |
| SNP15-55518865 | CGNL1     | 15 | 55518865 | 2 | 4.302724 |
| rs2131730      | CGNL1     | 15 | 55627080 | 1 | 5.143535 |
| rs2131731      | CGNL1     | 15 | 55627123 | 1 | 3.75235  |
| rs3742966      | CGNL1     | 15 | 55628028 | 1 | 0.984962 |
| rs3742966      | CGNL1     | 15 | 55628028 | 8 | 0.792154 |
| rs3742966      | CGNL1     | 15 | 55628028 | 4 | 1.04048  |
| rs937248       | CGNL1     | 15 | 55628061 | 1 | 5.459523 |
| rs2069133      | Gcom1     | 15 | 55705361 | 3 | 0.633334 |
| rs2069133      | Gcom1     | 15 | 55705361 | 5 | 0.825779 |
| rs2069133      | Gcom1     | 15 | 55705361 | 1 | 2.722882 |
| rs11858659     | GRINL1A   | 15 | 55786596 | 3 | 0.342945 |
| rs11858659     | GRINL1A   | 15 | 55786596 | 1 | 3.766988 |
| rs9325         | ALDH1A2   | 15 | 56033278 | 8 | 3.407534 |
| rs9325         | ALDH1A2   | 15 | 56033278 | 6 | 0.900011 |
| rs1061278      | ALDH1A2   | 15 | 56033321 | 3 | 2.328717 |
| rs1061278      | ALDH1A2   | 15 | 56033321 | 6 | 1.434626 |
| rs1061278      | ALDH1A2   | 15 | 56033321 | 8 | 1.349463 |
| rs1063666      | ALDH1A2   | 15 | 56033894 | 8 | 0.541122 |
| rs1063666      | ALDH1A2   | 15 | 56033894 | 6 | 0.454828 |
| rs4646643      | ALDH1A2   | 15 | 56033988 | 3 | 0.40614  |
| rs3204690      | ALDH1A2   | 15 | 56034060 | 6 | 1.069275 |
| rs3204690      | ALDH1A2   | 15 | 56034060 | 3 | 0.190739 |
| rs3204690      | ALDH1A2   | 15 | 56034060 | 2 | 0.727108 |
| rs3204689      | ALDH1A2   | 15 | 56034094 | 6 | 0.729639 |
| rs16940856     | FAM63B    | 15 | 56934840 | 2 | 6.40548  |
| rs7164756      | GTF2A2    | 15 | 57736917 | 1 | 2.129944 |
| rs7164756      | GTF2A2    | 15 | 57736917 | 4 | 0.592084 |
| SNP15-58440497 | ANXA2     | 15 | 58440497 | 3 | 1.619441 |
| SNP15-58440497 | ANXA2     | 15 | 58440497 | 4 | 9.240591 |
| rs17303894     | VPS13C    | 15 | 59952869 | 6 | 2.709215 |
| rs4775538      | TLN2      | 15 | 60835085 | 3 | 0.59935  |

|                |          |    |          |   |          |
|----------------|----------|----|----------|---|----------|
| rs4775538      | TLN2     | 15 | 60835085 | 4 | 0.499439 |
| rs3816988      | TLN2     | 15 | 60898792 | 4 | 1.374184 |
| rs3816988      | TLN2     | 15 | 60898792 | 2 | 0.474249 |
| rs8038919      | TLN2     | 15 | 60915036 | 2 | 3.413013 |
| rs8038919      | TLN2     | 15 | 60915036 | 4 | 2.183334 |
| rs937418       | TLN2     | 15 | 60918170 | 2 | 4.5988   |
| rs937418       | TLN2     | 15 | 60918170 | 4 | 3.247136 |
| rs1043256      | CA12     | 15 | 61403532 | 6 | 6.692531 |
| rs1043256      | CA12     | 15 | 61403532 | 1 | 4.433259 |
| rs1043256      | CA12     | 15 | 61403532 | 7 | 1.100112 |
| rs1043256      | CA12     | 15 | 61403532 | 3 | 1.324699 |
| rs10851731     | HERC1    | 15 | 61709805 | 6 | 3.654179 |
| rs10851731     | HERC1    | 15 | 61709805 | 2 | 6.353594 |
| rs2228517      | HERC1    | 15 | 61719566 | 3 | 0.287639 |
| rs2228517      | HERC1    | 15 | 61719566 | 2 | 1.803379 |
| rs2228517      | HERC1    | 15 | 61719566 | 6 | 3.447918 |
| rs2228517      | HERC1    | 15 | 61719566 | 7 | 0.360441 |
| rs2228517      | HERC1    | 15 | 61719566 | 4 | 0.712763 |
| rs7162473      | HERC1    | 15 | 61724262 | 2 | 3.443615 |
| rs7162473      | HERC1    | 15 | 61724262 | 6 | 1.123223 |
| SNP15-61775410 | HERC1    | 15 | 61775410 | 6 | 0.328853 |
| SNP15-61808529 | HERC1    | 15 | 61808529 | 5 | 0.110555 |
| rs749504       | SNX1     | 15 | 62217660 | 5 | 0.08532  |
| rs749504       | SNX1     | 15 | 62217660 | 1 | 4.98213  |
| rs6494466      | CSNK1G1  | 15 | 62295816 | 1 | 4.895463 |
| rs6494466      | CSNK1G1  | 15 | 62295816 | 5 | 0.096775 |
| rs2010875      | PLEKHO2  | 15 | 62944535 | 1 | 1.030112 |
| rs2010875      | PLEKHO2  | 15 | 62944535 | 4 | 0.906729 |
| rs11853777     | PUNC     | 15 | 63408191 | 1 | 1.10889  |
| rs2280345      | NOPE     | 15 | 63461230 | 8 | 1.28395  |
| rs2280345      | NOPE     | 15 | 63461230 | 4 | 0.604411 |
| SNP15-63490678 | NOPE     | 15 | 63490678 | 1 | 0.475407 |
| SNP15-63490678 | NOPE     | 15 | 63490678 | 5 | 0.082477 |
| SNP15-63490678 | NOPE     | 15 | 63490678 | 2 | 4.429177 |
| rs422390       | PTPLAD1  | 15 | 63609876 | 8 | 6.294011 |
| rs3743169      | C15orf44 | 15 | 63658492 | 8 | 4.931328 |
| rs11484        | C15orf44 | 15 | 63658751 | 8 | 7.472484 |
| GA012458       | C15orf44 | 15 | 63664227 | 4 | 1.498426 |
| rs4366668      | C15orf44 | 15 | 63690451 | 7 | 5.584761 |
| rs4366668      | C15orf44 | 15 | 63690451 | 4 | 0.145946 |
| rs4366668      | C15orf44 | 15 | 63690451 | 5 | 0.676211 |
| rs4366668      | C15orf44 | 15 | 63690451 | 3 | 1.188146 |
| rs1369312      | DENND4A  | 15 | 63871461 | 3 | 0.763415 |
| rs1369312      | DENND4A  | 15 | 63871461 | 2 | 1.050994 |
| rs1369312      | DENND4A  | 15 | 63871461 | 4 | 0.418645 |
| rs1369312      | DENND4A  | 15 | 63871461 | 1 | 0.485222 |
| rs1369312      | DENND4A  | 15 | 63871461 | 7 | 0.965256 |

|                |           |    |          |   |          |
|----------------|-----------|----|----------|---|----------|
| rs11634482     | MEGF11    | 15 | 63977021 | 6 | 0.347909 |
| rs11634482     | MEGF11    | 15 | 63977021 | 7 | 0.171088 |
| rs6494602      | LOC390597 | 15 | 64888338 | 5 | 0.771818 |
| rs41305272     | MAP2K5    | 15 | 65886497 | 7 | 0.781874 |
| rs41305272     | MAP2K5    | 15 | 65886497 | 2 | 6.899925 |
| rs11071991     | CALML4    | 15 | 66285106 | 7 | 0.667434 |
| rs11071991     | CALML4    | 15 | 66285106 | 5 | 4.190878 |
| rs11071991     | CALML4    | 15 | 66285106 | 4 | 0.271325 |
| rs11071991     | CALML4    | 15 | 66285106 | 1 | 0.556413 |
| rs4777035      | ITGA11    | 15 | 66392223 | 1 | 2.830831 |
| rs4777035      | ITGA11    | 15 | 66392223 | 6 | 0.966947 |
| rs4777035      | ITGA11    | 15 | 66392223 | 3 | 0.457052 |
| rs2271725      | ITGA11    | 15 | 66396701 | 1 | 4.484761 |
| rs3736493      | ITGA11    | 15 | 66400841 | 6 | 1.209859 |
| rs3736493      | ITGA11    | 15 | 66400841 | 4 | 0.93183  |
| rs3736493      | ITGA11    | 15 | 66400841 | 3 | 0.390976 |
| rs7168069      | ITGA11    | 15 | 66411450 | 7 | 0.826958 |
| rs7168069      | ITGA11    | 15 | 66411450 | 6 | 1.211282 |
| rs7168069      | ITGA11    | 15 | 66411450 | 3 | 1.160013 |
| rs7168069      | ITGA11    | 15 | 66411450 | 4 | 0.420813 |
| rs2306023      | ITGA11    | 15 | 66415197 | 4 | 0.679069 |
| rs2306023      | ITGA11    | 15 | 66415197 | 3 | 0.154984 |
| rs2306023      | ITGA11    | 15 | 66415197 | 6 | 0.677205 |
| rs12907890     | ITGA11    | 15 | 66436641 | 7 | 3.211197 |
| rs12907890     | ITGA11    | 15 | 66436641 | 8 | 0.142501 |
| rs17279860     | CORO2B    | 15 | 66806013 | 4 | 2.774868 |
| rs17279860     | CORO2B    | 15 | 66806013 | 6 | 3.194854 |
| SNP15-67115280 | NOX5      | 15 | 67115280 | 1 | 0.18366  |
| SNP15-67115280 | NOX5      | 15 | 67115280 | 5 | 0.625821 |
| SNP15-67115280 | NOX5      | 15 | 67115280 | 2 | 2.963035 |
| SNP15-67115280 | NOX5      | 15 | 67115280 | 3 | 0.126421 |
| rs16953674     | GLCE      | 15 | 67350228 | 5 | 0.759763 |
| rs16953466     | LOC145837 | 15 | 67644716 | 8 | 0.023719 |
| rs1057865      | TLE3      | 15 | 68132680 | 1 | 4.796903 |
| rs1057865      | TLE3      | 15 | 68132680 | 3 | 0.696422 |
| rs1057865      | TLE3      | 15 | 68132680 | 8 | 7.476464 |
| rs1057865      | TLE3      | 15 | 68132680 | 5 | 0.794599 |
| rs17759219     | TLE3      | 15 | 68140022 | 5 | 0.184894 |
| rs17759219     | TLE3      | 15 | 68140022 | 1 | 4.589426 |
| rs17759219     | TLE3      | 15 | 68140022 | 4 | 0.045557 |
| rs17759219     | TLE3      | 15 | 68140022 | 7 | 0.107202 |
| rs4777310      | LOC729611 | 15 | 68876192 | 7 | 1.195969 |
| rs2959174      | THAP10    | 15 | 68971332 | 7 | 0.665236 |
| rs2959174      | THAP10    | 15 | 68971332 | 5 | 0.20569  |
| rs2959174      | THAP10    | 15 | 68971332 | 8 | 3.157577 |
| rs2959174      | THAP10    | 15 | 68971332 | 4 | 6.240277 |
| rs2955035      | THAP10    | 15 | 68971549 | 7 | 2.708    |

|                |         |    |          |   |          |
|----------------|---------|----|----------|---|----------|
| rs2955035      | THAP10  | 15 | 68971549 | 5 | 0.235046 |
| rs2955035      | THAP10  | 15 | 68971549 | 4 | 3.84594  |
| rs2955035      | THAP10  | 15 | 68971549 | 8 | 0.322526 |
| SNP15-69063542 | LRRRC49 | 15 | 69063542 | 6 | 7.707871 |
| SNP15-69063542 | LRRRC49 | 15 | 69063542 | 5 | 1.057104 |
| SNP15-69063542 | LRRRC49 | 15 | 69063542 | 8 | 0.915971 |
| SNP15-69063542 | LRRRC49 | 15 | 69063542 | 4 | 0.312625 |
| SNP15-69063542 | LRRRC49 | 15 | 69063542 | 7 | 0.624451 |
| rs17811309     | THSD4   | 15 | 69860243 | 6 | 3.478158 |
| rs10468050     | THSD4   | 15 | 69860993 | 5 | 0.113451 |
| rs2625529      | MYO9A   | 15 | 69905831 | 6 | 1.23061  |
| rs2625529      | MYO9A   | 15 | 69905831 | 7 | 5.526649 |
| rs13858        | SENP8   | 15 | 70220198 | 7 | 0.815761 |
| rs13858        | SENP8   | 15 | 70220198 | 8 | 0.526741 |
| rs13858        | SENP8   | 15 | 70220198 | 6 | 1.120779 |
| rs1800428      | HEXA    | 15 | 70455359 | 8 | 5.110207 |
| rs1131854      | NEO1    | 15 | 71351934 | 2 | 4.880328 |
| rs1131854      | NEO1    | 15 | 71351934 | 4 | 3.795438 |
| rs11574479     | CD276   | 15 | 71782226 | 8 | 5.691521 |
| rs11574479     | CD276   | 15 | 71782226 | 4 | 1.548292 |
| rs11574479     | CD276   | 15 | 71782226 | 1 | 4.469094 |
| rs2291012      | CD276   | 15 | 71787782 | 8 | 0.712968 |
| rs2291012      | CD276   | 15 | 71787782 | 4 | 0.519598 |
| rs2291012      | CD276   | 15 | 71787782 | 1 | 4.94011  |
| rs11574491     | CD276   | 15 | 71789046 | 1 | 1.559385 |
| rs11574491     | CD276   | 15 | 71789046 | 4 | 0.336572 |
| rs1048661      | LOXL1   | 15 | 72006599 | 4 | 1.766069 |
| rs1048661      | LOXL1   | 15 | 72006599 | 7 | 0.782696 |
| rs1048661      | LOXL1   | 15 | 72006599 | 3 | 1.416441 |
| rs3825942      | LOXL1   | 15 | 72006635 | 5 | 0.378958 |
| rs3825942      | LOXL1   | 15 | 72006635 | 8 | 1.361911 |
| rs3825942      | LOXL1   | 15 | 72006635 | 1 | 2.21173  |
| rs11854957     | ISLR    | 15 | 72254849 | 7 | 1.380905 |
| rs11854957     | ISLR    | 15 | 72254849 | 6 | 0.476775 |
| rs11854957     | ISLR    | 15 | 72254849 | 2 | 0.841367 |
| rs11854957     | ISLR    | 15 | 72254849 | 1 | 0.457678 |
| rs11854957     | ISLR    | 15 | 72254849 | 3 | 0.554122 |
| rs1052622      | ISLR    | 15 | 72254909 | 1 | 2.527713 |
| rs1052622      | ISLR    | 15 | 72254909 | 7 | 1.68935  |
| rs1052622      | ISLR    | 15 | 72254909 | 3 | 0.003747 |
| rs3848160      | ISLR    | 15 | 72255547 | 2 | 1.965162 |
| rs3848160      | ISLR    | 15 | 72255547 | 4 | 0.202809 |
| rs3848160      | ISLR    | 15 | 72255547 | 1 | 1.076271 |
| rs3848160      | ISLR    | 15 | 72255547 | 6 | 1.414953 |
| rs3888004      | ISLR    | 15 | 72255819 | 6 | 1.943885 |
| rs3888004      | ISLR    | 15 | 72255819 | 3 | 1.728531 |
| rs3888004      | ISLR    | 15 | 72255819 | 2 | 2.345604 |

|                |           |    |          |   |          |
|----------------|-----------|----|----------|---|----------|
| rs3888004      | ISLR      | 15 | 72255819 | 4 | 0.499739 |
| rs3888004      | ISLR      | 15 | 72255819 | 1 | 1.891467 |
| rs13259        | ISLR      | 15 | 72256039 | 6 | 0.307003 |
| rs13259        | ISLR      | 15 | 72256039 | 2 | 1.940584 |
| rs13259        | ISLR      | 15 | 72256039 | 3 | 0.651277 |
| rs13259        | ISLR      | 15 | 72256039 | 1 | 0.000764 |
| rs13259        | ISLR      | 15 | 72256039 | 7 | 0.247532 |
| rs13259        | ISLR      | 15 | 72256039 | 4 | 0.306322 |
| rs3848161      | ISLR      | 15 | 72256150 | 3 | 0.240881 |
| rs3848161      | ISLR      | 15 | 72256150 | 2 | 3.201707 |
| rs3848161      | ISLR      | 15 | 72256150 | 1 | 1.078162 |
| rs3848161      | ISLR      | 15 | 72256150 | 4 | 0.105043 |
| rs3848161      | ISLR      | 15 | 72256150 | 7 | 1.99175  |
| rs736118       | STRA6     | 15 | 72260792 | 2 | 2.828983 |
| rs736118       | STRA6     | 15 | 72260792 | 4 | 0.496783 |
| rs11857410     | STRA6     | 15 | 72275477 | 6 | 1.623749 |
| rs11857410     | STRA6     | 15 | 72275477 | 4 | 0.028987 |
| rs11857410     | STRA6     | 15 | 72275477 | 1 | 1.689031 |
| rs11857410     | STRA6     | 15 | 72275477 | 3 | 2.560759 |
| rs11857410     | STRA6     | 15 | 72275477 | 7 | 0.943698 |
| rs1564782      | CCDC33    | 15 | 72409731 | 1 | 0.727564 |
| rs900802       | CCDC33    | 15 | 72415295 | 7 | 0.120983 |
| rs2075594      | SEMA7A    | 15 | 72489714 | 5 | 0.385024 |
| rs2075593      | SEMA7A    | 15 | 72489831 | 5 | 1.430044 |
| rs2075592      | SEMA7A    | 15 | 72490075 | 5 | 0.901795 |
| rs1046146      | SEMA7A    | 15 | 72493996 | 5 | 5.40786  |
| rs1128628      | EDC3      | 15 | 72710388 | 7 | 0.451987 |
| rs1128628      | EDC3      | 15 | 72710388 | 3 | 0.158842 |
| rs3803568      | LMAN1L    | 15 | 72895689 | 3 | 1.771536 |
| rs3743487      | CPLX3     | 15 | 72909909 | 3 | 0.323615 |
| rs9210         | ULK3      | 15 | 72915554 | 5 | 7.851292 |
| rs9210         | ULK3      | 15 | 72915554 | 2 | 2.080749 |
| rs4886615      | ULK3      | 15 | 72918714 | 2 | 3.863259 |
| rs4886615      | ULK3      | 15 | 72918714 | 5 | 0.812604 |
| rs7174129      | SCAMP5    | 15 | 73092093 | 3 | 1.909147 |
| rs13056        | SCAMP5    | 15 | 73099240 | 3 | 2.968979 |
| rs3812943      | SCAMP5    | 15 | 73099768 | 3 | 1.898282 |
| rs1873379      | C15orf39  | 15 | 73285797 | 5 | 0.461118 |
| rs1873379      | C15orf39  | 15 | 73285797 | 3 | 0.57908  |
| rs1873379      | C15orf39  | 15 | 73285797 | 6 | 7.649022 |
| rs1873379      | C15orf39  | 15 | 73285797 | 2 | 3.544368 |
| rs11637068     | LOC647520 | 15 | 73530055 | 5 | 1.708481 |
| rs11637068     | LOC647520 | 15 | 73530055 | 1 | 0.735615 |
| SNP15-73700315 | SNUPN     | 15 | 73700315 | 6 | 4.55944  |
| rs1127649      | CSPG4     | 15 | 73754109 | 4 | 0.51097  |
| rs1127649      | CSPG4     | 15 | 73754109 | 2 | 4.488656 |
| rs1127649      | CSPG4     | 15 | 73754109 | 7 | 0.491395 |

|                |           |    |          |   |          |
|----------------|-----------|----|----------|---|----------|
| rs1127649      | CSPG4     | 15 | 73754109 | 5 | 0.089801 |
| rs1127649      | CSPG4     | 15 | 73754109 | 8 | 0.21582  |
| rs1127646      | CSPG4     | 15 | 73754869 | 5 | 0.75552  |
| rs1127646      | CSPG4     | 15 | 73754869 | 2 | 1.663802 |
| SNP15-73757125 | CSPG4     | 15 | 73757125 | 5 | 0.004975 |
| SNP15-73757125 | CSPG4     | 15 | 73757125 | 8 | 1.110234 |
| SNP15-73757125 | CSPG4     | 15 | 73757125 | 2 | 0.820955 |
| SNP15-73757125 | CSPG4     | 15 | 73757125 | 4 | 0.972826 |
| SNP15-73757125 | CSPG4     | 15 | 73757125 | 7 | 0.369663 |
| rs4414463      | CSPG4     | 15 | 73767167 | 2 | 2.02005  |
| rs4414463      | CSPG4     | 15 | 73767167 | 4 | 1.602015 |
| rs4414463      | CSPG4     | 15 | 73767167 | 8 | 0.081284 |
| rs4414463      | CSPG4     | 15 | 73767167 | 7 | 0.986954 |
| SNP15-73804507 | ODF3L1    | 15 | 73804507 | 1 | 1.662007 |
| SNP15-73804507 | ODF3L1    | 15 | 73804507 | 8 | 10.00387 |
| SNP15-73804507 | ODF3L1    | 15 | 73804507 | 3 | 1.655065 |
| SNP15-73804507 | ODF3L1    | 15 | 73804507 | 6 | 1.929588 |
| rs8026234      | LOC730054 | 15 | 73840625 | 7 | 0.344583 |
| SNP15-74283287 | C15orf27  | 15 | 74283287 | 1 | 3.432168 |
| SNP15-74283287 | C15orf27  | 15 | 74283287 | 3 | 0.981711 |
| rs937733       | C15orf27  | 15 | 74283395 | 3 | 0.820147 |
| rs937733       | C15orf27  | 15 | 74283395 | 1 | 1.356387 |
| rs937733       | C15orf27  | 15 | 74283395 | 8 | 1.904615 |
| rs2959850      | C15orf27  | 15 | 74284272 | 1 | 0.398771 |
| rs2959850      | C15orf27  | 15 | 74284272 | 7 | 0.742311 |
| rs2959850      | C15orf27  | 15 | 74284272 | 3 | 0.90256  |
| rs4636879      | ISL2      | 15 | 74417358 | 2 | 0.404051 |
| rs2469225      | SCAPER    | 15 | 74427713 | 2 | 5.380689 |
| SNP15-74513520 | SCAPER    | 15 | 74513520 | 8 | 6.613893 |
| SNP15-74513520 | SCAPER    | 15 | 74513520 | 3 | 0.235336 |
| SNP15-74513520 | SCAPER    | 15 | 74513520 | 1 | 5.054474 |
| rs3812908      | SCAPER    | 15 | 74963213 | 1 | 2.630357 |
| rs3812908      | SCAPER    | 15 | 74963213 | 3 | 0.073671 |
| rs1706848      | RCN2      | 15 | 75028806 | 2 | 3.821775 |
| rs35538044     | PSTPIP1   | 15 | 75115310 | 5 | 2.100283 |
| rs11737        | TSPAN3    | 15 | 75131848 | 3 | 0.419841 |
| rs11737        | TSPAN3    | 15 | 75131848 | 1 | 0.550948 |
| rs11639197     | SGK269    | 15 | 75190283 | 7 | 0.206325 |
| rs11639197     | SGK269    | 15 | 75190283 | 6 | 2.188838 |
| rs17381821     | SGK269    | 15 | 75190532 | 1 | 0.05402  |
| rs17381821     | SGK269    | 15 | 75190532 | 3 | 1.474973 |
| rs17381821     | SGK269    | 15 | 75190532 | 4 | 1.100317 |
| rs17381821     | SGK269    | 15 | 75190532 | 2 | 5.262575 |
| rs17381821     | SGK269    | 15 | 75190532 | 6 | 0.308841 |
| rs12901370     | SGK269    | 15 | 75190805 | 3 | 0.401077 |
| rs12901370     | SGK269    | 15 | 75190805 | 2 | 0.895385 |
| rs12901370     | SGK269    | 15 | 75190805 | 1 | 0.11482  |

|                |           |    |          |   |          |
|----------------|-----------|----|----------|---|----------|
| rs4886850      | SGK269    | 15 | 75191215 | 7 | 0.202615 |
| rs4886850      | SGK269    | 15 | 75191215 | 4 | 0.088685 |
| rs1867780      | SGK269    | 15 | 75194169 | 3 | 0.176401 |
| rs1867780      | SGK269    | 15 | 75194169 | 2 | 2.445448 |
| rs1867780      | SGK269    | 15 | 75194169 | 1 | 0.272033 |
| rs1867780      | SGK269    | 15 | 75194169 | 6 | 2.392864 |
| rs1867780      | SGK269    | 15 | 75194169 | 4 | 0.52956  |
| SNP15-75238019 | SGK269    | 15 | 75238019 | 7 | 0.003179 |
| rs1058129      | LINGO1    | 15 | 75692716 | 3 | 1.448363 |
| rs1058129      | LINGO1    | 15 | 75692716 | 1 | 0.967104 |
| rs3144         | LINGO1    | 15 | 75693259 | 6 | 0.88953  |
| rs3144         | LINGO1    | 15 | 75693259 | 3 | 0.585697 |
| rs3144         | LINGO1    | 15 | 75693259 | 2 | 1.987122 |
| rs2271396      | LINGO1    | 15 | 75694590 | 3 | 0.162521 |
| rs2271396      | LINGO1    | 15 | 75694590 | 1 | 2.288563 |
| rs2271397      | LINGO1    | 15 | 75694830 | 3 | 0.202744 |
| rs10519181     | TBC1D2B   | 15 | 76076030 | 6 | 1.24793  |
| rs10519181     | TBC1D2B   | 15 | 76076030 | 3 | 1.052311 |
| rs10519181     | TBC1D2B   | 15 | 76076030 | 1 | 4.677289 |
| rs10519181     | TBC1D2B   | 15 | 76076030 | 8 | 0.779767 |
| rs12593575     | hCG_38941 | 15 | 76177964 | 2 | 1.15506  |
| rs3825847      | ACSBG1    | 15 | 76250541 | 5 | 0.200196 |
| rs2304824      | ACSBG1    | 15 | 76253182 | 5 | 0.272032 |
| rs2304824      | ACSBG1    | 15 | 76253182 | 1 | 0.157729 |
| rs2304824      | ACSBG1    | 15 | 76253182 | 7 | 1.211518 |
| rs17479031     | ACSBG1    | 15 | 76259009 | 5 | 1.538653 |
| rs2280364      | WDR61     | 15 | 76372161 | 3 | 0.401131 |
| rs1127472      | CRABP1    | 15 | 76419885 | 3 | 0.645717 |
| rs13180        | IREB2     | 15 | 76576543 | 2 | 0.758058 |
| rs13180        | IREB2     | 15 | 76576543 | 1 | 0.264763 |
| rs13180        | IREB2     | 15 | 76576543 | 6 | 1.658923 |
| rs13180        | IREB2     | 15 | 76576543 | 3 | 0.732214 |
| rs13180        | IREB2     | 15 | 76576543 | 5 | 0.028311 |
| rs3813571      | PSMA4     | 15 | 76619847 | 7 | 0.977566 |
| rs3813571      | PSMA4     | 15 | 76619847 | 4 | 0.104853 |
| rs3813571      | PSMA4     | 15 | 76619847 | 8 | 3.653184 |
| rs3813571      | PSMA4     | 15 | 76619847 | 3 | 0.801824 |
| rs615470       | CHRNA5    | 15 | 76673043 | 1 | 6.718272 |
| rs615470       | CHRNA5    | 15 | 76673043 | 7 | 0.397569 |
| rs615470       | CHRNA5    | 15 | 76673043 | 4 | 6.033565 |
| rs615470       | CHRNA5    | 15 | 76673043 | 8 | 5.303035 |
| rs660652       | CHRNA3    | 15 | 76674887 | 4 | 1.679704 |
| rs660652       | CHRNA3    | 15 | 76674887 | 8 | 1.248683 |
| rs660652       | CHRNA3    | 15 | 76674887 | 7 | 0.852896 |
| rs660652       | CHRNA3    | 15 | 76674887 | 1 | 4.366459 |
| rs578776       | CHRNA3    | 15 | 76675455 | 1 | 6.053731 |
| rs578776       | CHRNA3    | 15 | 76675455 | 4 | 1.791066 |

|                |           |    |          |   |          |
|----------------|-----------|----|----------|---|----------|
| rs578776       | CHRNA3    | 15 | 76675455 | 5 | 1.53879  |
| rs578776       | CHRNA3    | 15 | 76675455 | 6 | 0.818496 |
| rs8040868      | CHRNA3    | 15 | 76698236 | 5 | 1.201499 |
| rs8040868      | CHRNA3    | 15 | 76698236 | 7 | 0.001714 |
| rs8040868      | CHRNA3    | 15 | 76698236 | 1 | 0.816616 |
| rs8192475      | CHRNA3    | 15 | 76698285 | 1 | 1.623692 |
| rs1948         | CHRNA4    | 15 | 76704454 | 7 | 0.067093 |
| rs1948         | CHRNA4    | 15 | 76704454 | 1 | 2.844226 |
| rs12914008     | CHRNA4    | 15 | 76710560 | 1 | 2.274929 |
| rs1964562      | LOC646938 | 15 | 76833546 | 7 | 5.382834 |
| rs1964562      | LOC646938 | 15 | 76833546 | 3 | 4.522306 |
| rs1964562      | LOC646938 | 15 | 76833546 | 2 | 5.022619 |
| rs1964562      | LOC646938 | 15 | 76833546 | 4 | 5.043021 |
| rs3825807      | ADAMTS7   | 15 | 76876166 | 2 | 3.662022 |
| rs3129         | CTSH      | 15 | 77001270 | 3 | 1.101172 |
| SNP15-77011782 | CTSH      | 15 | 77011782 | 3 | 0.536653 |
| SNP15-77011802 | CTSH      | 15 | 77011802 | 3 | 0.721811 |
| rs1036938      | CTSH      | 15 | 77024302 | 8 | 0.386848 |
| rs1036938      | CTSH      | 15 | 77024302 | 3 | 0.749193 |
| rs894780       | RASGRF1   | 15 | 77085578 | 1 | 1.244296 |
| rs1004724      | KIAA1024  | 15 | 77537362 | 4 | 0.165916 |
| rs2297773      | KIAA1024  | 15 | 77542659 | 6 | 0.008216 |
| rs2297773      | KIAA1024  | 15 | 77542659 | 4 | 2.265858 |
| rs17266017     | KIAA1024  | 15 | 77549580 | 7 | 0.999404 |
| rs17266017     | KIAA1024  | 15 | 77549580 | 8 | 1.036276 |
| rs1765255      | LOC390617 | 15 | 77639533 | 8 | 1.611389 |
| rs1765255      | LOC390617 | 15 | 77639533 | 6 | 2.582395 |
| rs1765255      | LOC390617 | 15 | 77639533 | 7 | 2.828959 |
| rs12442408     | C15orf37  | 15 | 78003380 | 4 | 3.468396 |
| rs12442408     | C15orf37  | 15 | 78003380 | 1 | 1.153368 |
| rs12442408     | C15orf37  | 15 | 78003380 | 2 | 3.102492 |
| rs2006863      | LOC401822 | 15 | 78024287 | 3 | 0.474935 |
| rs3826007      | BCL2A1    | 15 | 78050272 | 7 | 0.381928 |
| rs1138357      | BCL2A1    | 15 | 78050461 | 7 | 0.548978 |
| rs1801374      | FAH       | 15 | 78259616 | 5 | 1.994638 |
| rs8033706      | ARNT2     | 15 | 78673246 | 3 | 0.197598 |
| rs7172733      | ARNT2     | 15 | 78673539 | 4 | 0.888012 |
| rs4301984      | ARNT2     | 15 | 78674486 | 6 | 0.61657  |
| rs4301984      | ARNT2     | 15 | 78674486 | 3 | 1.560582 |
| rs4459508      | ARNT2     | 15 | 78674561 | 3 | 0.26698  |
| SNP15-78676603 | ARNT2     | 15 | 78676603 | 4 | 0.53859  |
| rs1139651      | ARNT2     | 15 | 78677061 | 4 | 0.353877 |
| rs1139651      | ARNT2     | 15 | 78677061 | 6 | 3.93572  |
| rs9801         | ARNT2     | 15 | 78677244 | 6 | 0.668996 |
| rs3743040      | MESDC2    | 15 | 79057196 | 1 | 4.952276 |
| rs3743040      | MESDC2    | 15 | 79057196 | 7 | 0.493931 |
| rs2250029      | LOC647020 | 15 | 79197543 | 5 | 0.460421 |



|                |           |    |          |   |          |
|----------------|-----------|----|----------|---|----------|
| rs2250029      | LOC647020 | 15 | 79197543 | 1 | 0.437886 |
| rs2250029      | LOC647020 | 15 | 79197543 | 3 | 0.49511  |
| rs4072111      | IL16      | 15 | 79365194 | 8 | 0.1076   |
| rs8031107      | IL16      | 15 | 79369923 | 4 | 0.762769 |
| rs17875557     | IL16      | 15 | 79389202 | 2 | 5.99643  |
| rs8041557      | IL16      | 15 | 79391159 | 4 | 0.077958 |
| rs8041557      | IL16      | 15 | 79391159 | 6 | 0.022323 |
| rs8041557      | IL16      | 15 | 79391159 | 7 | 0.545152 |
| rs17875563     | IL16      | 15 | 79391348 | 6 | 0.020525 |
| rs17875563     | IL16      | 15 | 79391348 | 8 | 0.084881 |
| rs17875563     | IL16      | 15 | 79391348 | 4 | 0.002299 |
| rs17875563     | IL16      | 15 | 79391348 | 7 | 0.128897 |
| rs17875563     | IL16      | 15 | 79391348 | 3 | 0.737494 |
| rs4778641      | IL16      | 15 | 79391443 | 6 | 0.773478 |
| rs4778641      | IL16      | 15 | 79391443 | 8 | 6.510476 |
| rs4778641      | IL16      | 15 | 79391443 | 3 | 1.774387 |
| rs4778641      | IL16      | 15 | 79391443 | 7 | 0.240595 |
| rs4778641      | IL16      | 15 | 79391443 | 4 | 1.396981 |
| SNP15-79452076 | TMC3      | 15 | 79452076 | 8 | 1.886747 |
| SNP15-79452076 | TMC3      | 15 | 79452076 | 3 | 2.095712 |
| SNP15-80230879 | EFTUD1    | 15 | 80230879 | 8 | 1.873503 |
| SNP15-80351046 | FAM154B   | 15 | 80351046 | 7 | 2.238457 |
| SNP15-80351046 | FAM154B   | 15 | 80351046 | 2 | 1.911718 |
| SNP15-80351046 | FAM154B   | 15 | 80351046 | 8 | 3.032353 |
| SNP15-80351046 | FAM154B   | 15 | 80351046 | 6 | 1.370523 |
| SNP15-80351046 | FAM154B   | 15 | 80351046 | 4 | 1.578501 |
| rs1267657      | CPEB1     | 15 | 81012306 | 3 | 0.048817 |
| rs1267657      | CPEB1     | 15 | 81012306 | 1 | 0.243792 |
| rs9806343      | AP3B2     | 15 | 81131300 | 8 | 1.397459 |
| rs1108134      | FSD2      | 15 | 81225246 | 6 | 0.495797 |
| rs1108135      | FSD2      | 15 | 81225247 | 5 | 0.967263 |
| rs1108135      | FSD2      | 15 | 81225247 | 3 | 0.960593 |
| rs1108135      | FSD2      | 15 | 81225247 | 4 | 0.509411 |
| rs8042254      | WHDC1     | 15 | 81275223 | 2 | 1.327853 |
| rs8042254      | WHDC1     | 15 | 81275223 | 4 | 1.123975 |
| rs8042254      | WHDC1     | 15 | 81275223 | 5 | 5.251671 |
| rs3814282      | WHDC1     | 15 | 81296719 | 8 | 4.907795 |
| rs4842860      | C15orf40  | 15 | 81471291 | 8 | 0.592661 |
| rs4842860      | C15orf40  | 15 | 81471291 | 3 | 0.391692 |
| rs4842860      | C15orf40  | 15 | 81471291 | 7 | 0.007102 |
| rs4842860      | C15orf40  | 15 | 81471291 | 4 | 2.550558 |
| rs4842860      | C15orf40  | 15 | 81471291 | 1 | 3.766472 |
| rs17361375     | C15orf40  | 15 | 81471333 | 2 | 0.667468 |
| rs17361375     | C15orf40  | 15 | 81471333 | 8 | 3.276881 |
| rs17361375     | C15orf40  | 15 | 81471333 | 5 | 7.232267 |
| rs17361375     | C15orf40  | 15 | 81471333 | 7 | 1.36574  |
| rs17361375     | C15orf40  | 15 | 81471333 | 1 | 0.092405 |

|                |          |    |          |   |          |
|----------------|----------|----|----------|---|----------|
| rs1989         | TM6SF1   | 15 | 81572635 | 6 | 6.822029 |
| rs1050789      | SH3GL3   | 15 | 82078223 | 7 | 1.495649 |
| rs4842838      | ADAMTSL3 | 15 | 82373128 | 4 | 0.027153 |
| rs4842838      | ADAMTSL3 | 15 | 82373128 | 7 | 1.333575 |
| rs4842838      | ADAMTSL3 | 15 | 82373128 | 3 | 0.056926 |
| SNP15-82402371 | ADAMTSL3 | 15 | 82402371 | 1 | 2.321745 |
| SNP15-82402371 | ADAMTSL3 | 15 | 82402371 | 7 | 1.441795 |
| SNP15-82402371 | ADAMTSL3 | 15 | 82402371 | 4 | 0.29053  |
| rs2277849      | ADAMTSL3 | 15 | 82430354 | 6 | 1.083745 |
| rs2277849      | ADAMTSL3 | 15 | 82430354 | 4 | 3.319384 |
| rs2277849      | ADAMTSL3 | 15 | 82430354 | 8 | 3.803442 |
| rs2277849      | ADAMTSL3 | 15 | 82430354 | 1 | 5.049806 |
| rs2277849      | ADAMTSL3 | 15 | 82430354 | 7 | 0.91473  |
| rs2277849      | ADAMTSL3 | 15 | 82430354 | 5 | 4.627001 |
| rs7176737      | ADAMTSL3 | 15 | 82442294 | 3 | 0.088689 |
| rs2044502      | ZSCAN2   | 15 | 82965002 | 3 | 0.034646 |
| rs12442117     | SCAND2   | 15 | 82978902 | 1 | 2.953651 |
| rs3803403      | ALPK3    | 15 | 83184149 | 7 | 1.794931 |
| rs3803403      | ALPK3    | 15 | 83184149 | 4 | 2.493929 |
| rs3803403      | ALPK3    | 15 | 83184149 | 5 | 1.982631 |
| SNP15-83184713 | ALPK3    | 15 | 83184713 | 1 | 0.387036 |
| rs34122391     | ALPK3    | 15 | 83203614 | 2 | 2.315263 |
| rs3748380      | ALPK3    | 15 | 83212696 | 2 | 1.971178 |
| rs3748380      | ALPK3    | 15 | 83212696 | 6 | 0.474857 |
| rs3748379      | ALPK3    | 15 | 83213324 | 6 | 0.14325  |
| rs893162       | ALPK3    | 15 | 83215223 | 2 | 2.21019  |
| rs12900463     | ALPK3    | 15 | 83216390 | 5 | 3.820265 |
| rs12900463     | ALPK3    | 15 | 83216390 | 4 | 0.59585  |
| rs3803390      | SLC28A1  | 15 | 83268279 | 6 | 5.291672 |
| rs2242046      | SLC28A1  | 15 | 83279733 | 1 | 3.040717 |
| rs2242046      | SLC28A1  | 15 | 83279733 | 3 | 0.861084 |
| rs2242046      | SLC28A1  | 15 | 83279733 | 4 | 1.392708 |
| rs2242046      | SLC28A1  | 15 | 83279733 | 7 | 1.221691 |
| rs2242046      | SLC28A1  | 15 | 83279733 | 6 | 0.330798 |
| rs8025045      | SLC28A1  | 15 | 83289576 | 5 | 0.102736 |
| rs8025045      | SLC28A1  | 15 | 83289576 | 1 | 6.078627 |
| SNP15-83888099 | AKAP13   | 15 | 83888099 | 1 | 4.433695 |
| rs745191       | AKAP13   | 15 | 83924174 | 3 | 1.0852   |
| rs745191       | AKAP13   | 15 | 83924174 | 8 | 4.864185 |
| SNP15-83924368 | AKAP13   | 15 | 83924368 | 3 | 0.235449 |
| SNP15-83924368 | AKAP13   | 15 | 83924368 | 1 | 4.870223 |
| SNP15-83924368 | AKAP13   | 15 | 83924368 | 6 | 0.368506 |
| SNP15-83924368 | AKAP13   | 15 | 83924368 | 7 | 0.377735 |
| SNP15-83924368 | AKAP13   | 15 | 83924368 | 4 | 5.628249 |
| rs2241268      | AKAP13   | 15 | 84079313 | 8 | 0.723928 |
| rs2241268      | AKAP13   | 15 | 84079313 | 3 | 0.328528 |
| SNP15-84087791 | AKAP13   | 15 | 84087791 | 7 | 0.004424 |

|                |         |    |          |   |          |
|----------------|---------|----|----------|---|----------|
| rs11630274     | AKAP13  | 15 | 84089391 | 8 | 5.88699  |
| rs1053992      | AKAP13  | 15 | 84089522 | 8 | 7.571066 |
| rs1053992      | AKAP13  | 15 | 84089522 | 4 | 0.228445 |
| rs1053992      | AKAP13  | 15 | 84089522 | 1 | 4.830869 |
| rs3743326      | AKAP13  | 15 | 84090883 | 6 | 5.511746 |
| rs3743326      | AKAP13  | 15 | 84090883 | 7 | 0.658582 |
| rs3743328      | AKAP13  | 15 | 84091420 | 1 | 5.394112 |
| rs3743328      | AKAP13  | 15 | 84091420 | 5 | 0.259469 |
| rs8110         | AKAP13  | 15 | 84093328 | 7 | 8.609222 |
| rs8110         | AKAP13  | 15 | 84093328 | 1 | 4.119245 |
| rs8110         | AKAP13  | 15 | 84093328 | 6 | 1.470952 |
| rs3743332      | KLHL25  | 15 | 84104755 | 8 | 0.562332 |
| rs3743332      | KLHL25  | 15 | 84104755 | 3 | 1.054426 |
| rs2614657      | KLHL25  | 15 | 84114052 | 4 | 0.557289 |
| rs2614657      | KLHL25  | 15 | 84114052 | 5 | 1.294779 |
| rs2614657      | KLHL25  | 15 | 84114052 | 6 | 0.4929   |
| rs2614657      | KLHL25  | 15 | 84114052 | 7 | 1.631746 |
| rs1566088      | AGBL1   | 15 | 84607033 | 6 | 1.654501 |
| rs10520617     | AGBL1   | 15 | 84608546 | 3 | 1.169602 |
| rs10520618     | AGBL1   | 15 | 84608765 | 2 | 3.23981  |
| rs10520618     | AGBL1   | 15 | 84608765 | 4 | 2.791135 |
| rs10520618     | AGBL1   | 15 | 84608765 | 3 | 3.363131 |
| rs10520618     | AGBL1   | 15 | 84608765 | 1 | 3.102953 |
| rs11858435     | AGBL1   | 15 | 84615870 | 1 | 2.43186  |
| rs11858435     | AGBL1   | 15 | 84615870 | 2 | 3.124928 |
| rs11858435     | AGBL1   | 15 | 84615870 | 5 | 1.573998 |
| rs8027765      | ISG20L1 | 15 | 86970862 | 1 | 5.806359 |
| rs1777460      | ISG20L1 | 15 | 86974560 | 6 | 0.313741 |
| rs3826038      | ISG20L1 | 15 | 86974661 | 1 | 3.58697  |
| rs3743473      | ISG20L1 | 15 | 86975052 | 1 | 4.567061 |
| rs3200942      | ISG20   | 15 | 86983600 | 4 | 0.564145 |
| rs3200942      | ISG20   | 15 | 86983600 | 5 | 0.38752  |
| SNP15-87187656 | ACAN    | 15 | 87187656 | 7 | 1.114819 |
| rs2351491      | ACAN    | 15 | 87199109 | 3 | 0.366216 |
| rs3743399      | ACAN    | 15 | 87199334 | 3 | 0.07639  |
| rs938608       | ACAN    | 15 | 87199609 | 2 | 0.071268 |
| rs938608       | ACAN    | 15 | 87199609 | 3 | 1.56703  |
| rs4932439      | ACAN    | 15 | 87202113 | 3 | 0.563656 |
| rs3825994      | ACAN    | 15 | 87202619 | 3 | 1.088932 |
| rs3825994      | ACAN    | 15 | 87202619 | 2 | 3.393404 |
| rs1042630      | ACAN    | 15 | 87203055 | 3 | 0.312166 |
| rs1042630      | ACAN    | 15 | 87203055 | 6 | 0.500637 |
| rs1042631      | ACAN    | 15 | 87203243 | 3 | 7.404661 |
| rs17201864     | HAPLN3  | 15 | 87221978 | 4 | 0.79523  |
| SNP15-87257548 | MFGE8   | 15 | 87257548 | 8 | 1.658557 |
| SNP15-87257548 | MFGE8   | 15 | 87257548 | 6 | 0.181631 |
| SNP15-87257548 | MFGE8   | 15 | 87257548 | 4 | 0.615669 |

|                |           |    |          |   |          |
|----------------|-----------|----|----------|---|----------|
| SNP15-87257548 | MFGE8     | 15 | 87257548 | 1 | 4.583294 |
| SNP15-87257548 | MFGE8     | 15 | 87257548 | 5 | 4.493024 |
| rs8036512      | LOC728003 | 15 | 87541377 | 2 | 5.551065 |
| rs8036512      | LOC728003 | 15 | 87541377 | 5 | 5.899682 |
| rs2710         | RLBP1     | 15 | 87554224 | 6 | 0.741056 |
| rs2710         | RLBP1     | 15 | 87554224 | 5 | 0.058685 |
| rs3087374      | POLG      | 15 | 87660998 | 3 | 0.184302 |
| SNP15-87824562 | RHCG      | 15 | 87824562 | 7 | 0.545631 |
| SNP15-87824562 | RHCG      | 15 | 87824562 | 2 | 5.771788 |
| rs12900805     | KIF7      | 15 | 87975828 | 2 | 5.297507 |
| rs3803530      | KIF7      | 15 | 87977077 | 2 | 3.485669 |
| rs4316730      | WDR93     | 15 | 88046257 | 4 | 1.088546 |
| rs16974175     | WDR93     | 15 | 88047340 | 7 | 0.463955 |
| rs16974175     | WDR93     | 15 | 88047340 | 3 | 0.4772   |
| rs17238056     | WDR93     | 15 | 88049823 | 3 | 0.131036 |
| rs7163367      | WDR93     | 15 | 88061149 | 4 | 4.356942 |
| rs17240268     | ANPEP     | 15 | 88148818 | 4 | 0.723727 |
| rs1044246      | SEMA4B    | 15 | 88573204 | 5 | 0.527819 |
| rs1044246      | SEMA4B    | 15 | 88573204 | 1 | 5.423566 |
| rs10153004     | LOC390637 | 15 | 88586064 | 3 | 0.088159 |
| rs10153004     | LOC390637 | 15 | 88586064 | 8 | 6.038224 |
| rs4932171      | TTLL13    | 15 | 88595106 | 7 | 3.017625 |
| rs4932171      | TTLL13    | 15 | 88595106 | 5 | 2.304981 |
| rs2063742      | TTLL13    | 15 | 88601412 | 7 | 7.790635 |
| rs2063742      | TTLL13    | 15 | 88601412 | 5 | 0.630906 |
| rs11910        | LOC400446 | 15 | 88621725 | 5 | 0.688379 |
| rs11910        | LOC400446 | 15 | 88621725 | 7 | 0.602054 |
| rs2271552      | LOC728477 | 15 | 88639397 | 4 | 0.213635 |
| rs2271552      | LOC728477 | 15 | 88639397 | 1 | 3.944099 |
| rs8042825      | ZNF774    | 15 | 88698889 | 5 | 5.895599 |
| rs8042825      | ZNF774    | 15 | 88698889 | 4 | 0.4726   |
| rs8042825      | ZNF774    | 15 | 88698889 | 7 | 1.215701 |
| rs11854320     | ZNF774    | 15 | 88704506 | 8 | 5.497652 |
| rs6226         | FURIN     | 15 | 89225578 | 5 | 6.741079 |
| rs6226         | FURIN     | 15 | 89225578 | 1 | 4.09718  |
| rs6226         | FURIN     | 15 | 89225578 | 7 | 10.62772 |
| rs6226         | FURIN     | 15 | 89225578 | 6 | 3.984322 |
| rs6226         | FURIN     | 15 | 89225578 | 3 | 0.367224 |
| SNP15-89260479 | MAN2A2    | 15 | 89260479 | 8 | 0.22913  |
| SNP15-89260479 | MAN2A2    | 15 | 89260479 | 2 | 4.7533   |
| SNP15-89260479 | MAN2A2    | 15 | 89260479 | 4 | 0.483272 |
| SNP15-89262549 | MAN2A2    | 15 | 89262549 | 4 | 2.210986 |
| rs1266482      | MAN2A2    | 15 | 89264356 | 4 | 8.181539 |
| rs1266479      | MAN2A2    | 15 | 89265836 | 8 | 0.92224  |
| rs1266479      | MAN2A2    | 15 | 89265836 | 2 | 4.005661 |
| rs1266479      | MAN2A2    | 15 | 89265836 | 4 | 0.217372 |
| rs8034551      | UNC45A    | 15 | 89287309 | 8 | 0.522329 |

|                |           |    |          |   |          |
|----------------|-----------|----|----------|---|----------|
| rs8034551      | UNC45A    | 15 | 89287309 | 2 | 4.70838  |
| rs16945091     | RCCD1     | 15 | 89300085 | 6 | 1.077754 |
| rs16945091     | RCCD1     | 15 | 89300085 | 1 | 0.762155 |
| rs16945091     | RCCD1     | 15 | 89300085 | 8 | 0.356526 |
| rs16945091     | RCCD1     | 15 | 89300085 | 2 | 4.363621 |
| rs17600420     | ST8SIA2   | 15 | 90812139 | 1 | 2.702978 |
| rs1455773      | C15orf32  | 15 | 90816431 | 1 | 0.183155 |
| rs7174854      | C15orf32  | 15 | 90844980 | 1 | 0.421276 |
| rs496942       | LOC400451 | 15 | 90962842 | 8 | 1.496697 |
| rs496942       | LOC400451 | 15 | 90962842 | 6 | 0.659607 |
| rs4777755      | CHD2      | 15 | 91311607 | 4 | 6.970104 |
| rs11074121     | CHD2      | 15 | 91322608 | 4 | 0.343053 |
| rs8025851      | MCTP2     | 15 | 92685112 | 1 | 6.181946 |
| rs8025851      | MCTP2     | 15 | 92685112 | 6 | 0.211075 |
| rs8032343      | LOC728800 | 15 | 94747879 | 3 | 0.386202 |
| rs7180888      | LOC388181 | 15 | 95102199 | 3 | 1.627696 |
| rs7180888      | LOC388181 | 15 | 95102199 | 5 | 0.719242 |
| SNP15-96313435 | ARRDC4    | 15 | 96313435 | 8 | 8.544279 |
| rs1521484      | LOC145814 | 15 | 97329316 | 3 | 0.636353 |
| rs1521484      | LOC145814 | 15 | 97329316 | 5 | 0.35011  |
| rs2715423      | LOC145814 | 15 | 97329396 | 3 | 0.44944  |
| SNP15-97487788 | DMN       | 15 | 97487788 | 5 | 6.884954 |
| rs1670227      | DMN       | 15 | 97488041 | 5 | 1.559893 |
| rs1670227      | DMN       | 15 | 97488041 | 3 | 0.193825 |
| SNP15-97489288 | DMN       | 15 | 97489288 | 2 | 6.138457 |
| rs2602016      | TTC23     | 15 | 97532875 | 3 | 1.195951 |
| rs2602016      | TTC23     | 15 | 97532875 | 2 | 4.255262 |
| rs2602016      | TTC23     | 15 | 97532875 | 5 | 1.184504 |
| rs2573652      | ADAMTS17  | 15 | 98332137 | 4 | 0.381716 |
| rs2573652      | ADAMTS17  | 15 | 98332137 | 2 | 1.268313 |
| rs2573652      | ADAMTS17  | 15 | 98332137 | 6 | 2.254083 |
| rs2573652      | ADAMTS17  | 15 | 98332137 | 8 | 1.731749 |
| rs2573652      | ADAMTS17  | 15 | 98332137 | 1 | 2.571922 |
| SNP15-98510368 | ADAMTS17  | 15 | 98510368 | 4 | 0.331411 |
| SNP15-98510368 | ADAMTS17  | 15 | 98510368 | 2 | 2.134216 |
| rs4369638      | ADAMTS17  | 15 | 98611886 | 1 | 2.513154 |
| rs4369638      | ADAMTS17  | 15 | 98611886 | 5 | 0.192728 |
| rs4369638      | ADAMTS17  | 15 | 98611886 | 3 | 0.529214 |
| rs4965613      | ADAMTS17  | 15 | 98619221 | 7 | 0.877541 |
| rs4965613      | ADAMTS17  | 15 | 98619221 | 3 | 0.749567 |
| rs7496640      | ADAMTS17  | 15 | 98638990 | 1 | 3.530854 |
| rs7496640      | ADAMTS17  | 15 | 98638990 | 7 | 0.03258  |
| rs7496640      | ADAMTS17  | 15 | 98638990 | 8 | 0.074816 |
| rs7496668      | ADAMTS17  | 15 | 98639099 | 1 | 2.310697 |
| rs7496668      | ADAMTS17  | 15 | 98639099 | 8 | 0.265165 |
| rs7496668      | ADAMTS17  | 15 | 98639099 | 7 | 0.12913  |
| rs4965643      | FLJ42289  | 15 | 98707907 | 3 | 1.016541 |

|            |             |    |           |   |          |
|------------|-------------|----|-----------|---|----------|
| rs12157    | LINS1       | 15 | 98927317  | 3 | 0.037739 |
| rs12157    | LINS1       | 15 | 98927317  | 2 | 4.479515 |
| rs2411837  | LINS1       | 15 | 98927825  | 2 | 4.434504 |
| rs2411837  | LINS1       | 15 | 98927825  | 3 | 1.350943 |
| rs748386   | LOC440313   | 15 | 99143607  | 4 | 0.228549 |
| rs748386   | LOC440313   | 15 | 99143607  | 2 | 2.927892 |
| rs748386   | LOC440313   | 15 | 99143607  | 7 | 0.202566 |
| rs7045     | ALDH1A3     | 15 | 99274306  | 8 | 1.593461 |
| rs7045     | ALDH1A3     | 15 | 99274306  | 1 | 3.699585 |
| rs2412000  | LRRK1       | 15 | 99347117  | 5 | 0.140661 |
| rs4965778  | LRRK1       | 15 | 99409446  | 1 | 0.803041 |
| rs4965778  | LRRK1       | 15 | 99409446  | 5 | 0.547329 |
| rs4965778  | LRRK1       | 15 | 99409446  | 3 | 0.067033 |
| rs11857803 | LRRK1       | 15 | 99415723  | 7 | 0.156968 |
| rs11857803 | LRRK1       | 15 | 99415723  | 1 | 2.544786 |
| rs11857803 | LRRK1       | 15 | 99415723  | 6 | 0.475588 |
| rs11857803 | LRRK1       | 15 | 99415723  | 3 | 1.083258 |
| rs11857803 | LRRK1       | 15 | 99415723  | 5 | 0.459943 |
| rs1048327  | LRRK1       | 15 | 99427260  | 8 | 7.945312 |
| rs3784526  | CHSY1       | 15 | 99534320  | 2 | 4.445931 |
| rs3784526  | CHSY1       | 15 | 99534320  | 3 | 0.085497 |
| rs2005180  | CHSY1       | 15 | 99536223  | 5 | 5.424181 |
| rs7175303  | CHSY1       | 15 | 99609128  | 4 | 0.017337 |
| rs7175303  | CHSY1       | 15 | 99609128  | 6 | 0.855958 |
| rs12438654 | SELS        | 15 | 99628816  | 5 | 4.867952 |
| rs2949     | PCSK6       | 15 | 99705290  | 7 | 0.159954 |
| rs2949     | PCSK6       | 15 | 99705290  | 5 | 0.308873 |
| rs2949     | PCSK6       | 15 | 99705290  | 4 | 1.97689  |
| rs2949     | PCSK6       | 15 | 99705290  | 3 | 0.014969 |
| rs2949     | PCSK6       | 15 | 99705290  | 1 | 1.249957 |
| rs20543    | PCSK6       | 15 | 99728073  | 3 | 2.156394 |
| rs20543    | PCSK6       | 15 | 99728073  | 5 | 1.580465 |
| rs1135911  | PCSK6       | 15 | 99742069  | 3 | 2.004787 |
| rs1135911  | PCSK6       | 15 | 99742069  | 7 | 0.490546 |
| rs2939587  | TM2D3       | 15 | 100010071 | 3 | 0.940767 |
| rs216590   | hCG_1644884 | 16 | 41263     | 5 | 0.418499 |
| rs216590   | hCG_1644884 | 16 | 41263     | 1 | 0.769045 |
| rs216590   | hCG_1644884 | 16 | 41263     | 7 | 0.418518 |
| rs2541593  | hCG_1644884 | 16 | 43423     | 7 | 0.592556 |
| rs2541593  | hCG_1644884 | 16 | 43423     | 5 | 0.658803 |
| rs2541593  | hCG_1644884 | 16 | 43423     | 2 | 0.778071 |
| rs2541593  | hCG_1644884 | 16 | 43423     | 1 | 0.846738 |
| rs1045001  | C16orf33    | 16 | 47275     | 7 | 3.397736 |
| rs1045001  | C16orf33    | 16 | 47275     | 1 | 0.069299 |
| rs216598   | RHBDF1      | 16 | 48585     | 2 | 0.575716 |
| rs216598   | RHBDF1      | 16 | 48585     | 1 | 0.033381 |
| rs216598   | RHBDF1      | 16 | 48585     | 7 | 0.239635 |

|            |           |    |        |   |          |
|------------|-----------|----|--------|---|----------|
| rs3176380  | MPG       | 16 | 69266  | 7 | 1.520492 |
| rs11248850 | LOC728037 | 16 | 103598 | 7 | 0.0203   |
| rs11248850 | LOC728037 | 16 | 103598 | 4 | 0.286297 |
| rs11248850 | LOC728037 | 16 | 103598 | 2 | 1.24674  |
| rs11865131 | LOC728037 | 16 | 103667 | 7 | 0.642855 |
| rs11865131 | LOC728037 | 16 | 103667 | 2 | 0.831773 |
| rs11865131 | LOC728037 | 16 | 103667 | 4 | 0.085582 |
| rs11865131 | LOC728037 | 16 | 103667 | 8 | 0.186236 |
| rs2541608  | C16orf35  | 16 | 128606 | 5 | 0.73045  |
| rs2541608  | C16orf35  | 16 | 128606 | 4 | 0.984916 |
| rs2541608  | C16orf35  | 16 | 128606 | 1 | 4.215411 |
| rs2685126  | RGS11     | 16 | 264053 | 1 | 3.096408 |
| rs2685126  | RGS11     | 16 | 264053 | 5 | 0.087385 |
| rs443338   | ARHGDIG   | 16 | 272993 | 7 | 1.806003 |
| rs443338   | ARHGDIG   | 16 | 272993 | 6 | 1.358581 |
| rs419949   | PDIA2     | 16 | 274891 | 1 | 1.354321 |
| rs419949   | PDIA2     | 16 | 274891 | 5 | 1.304484 |
| rs419949   | PDIA2     | 16 | 274891 | 3 | 0.063504 |
| rs2685127  | PDIA2     | 16 | 275374 | 5 | 0.815138 |
| rs400037   | PDIA2     | 16 | 276397 | 5 | 0.770619 |
| rs400037   | PDIA2     | 16 | 276397 | 1 | 4.024113 |
| rs400037   | PDIA2     | 16 | 276397 | 3 | 0.567326 |
| rs11647490 | PDIA2     | 16 | 276661 | 2 | 1.97661  |
| rs11647490 | PDIA2     | 16 | 276661 | 7 | 0.709283 |
| rs11647490 | PDIA2     | 16 | 276661 | 5 | 2.104624 |
| rs11647490 | PDIA2     | 16 | 276661 | 3 | 1.399439 |
| rs11647490 | PDIA2     | 16 | 276661 | 1 | 0.633978 |
| rs34665498 | AXIN1     | 16 | 277692 | 2 | 4.045132 |
| rs214250   | AXIN1     | 16 | 288223 | 5 | 0.70801  |
| rs214250   | AXIN1     | 16 | 288223 | 1 | 5.963004 |
| rs214250   | AXIN1     | 16 | 288223 | 3 | 0.510935 |
| rs758033   | AXIN1     | 16 | 337045 | 1 | 5.527774 |
| rs3743887  | TMEM8     | 16 | 364278 | 2 | 2.928174 |
| rs3743887  | TMEM8     | 16 | 364278 | 4 | 0.501218 |
| rs3213574  | SOLH      | 16 | 541633 | 1 | 3.148338 |
| rs3213574  | SOLH      | 16 | 541633 | 3 | 0.101993 |
| rs3213574  | SOLH      | 16 | 541633 | 6 | 1.277739 |
| rs2071979  | PIGQ      | 16 | 564115 | 3 | 0.132127 |
| rs2071979  | PIGQ      | 16 | 564115 | 6 | 0.054271 |
| rs2071979  | PIGQ      | 16 | 564115 | 4 | 1.323467 |
| rs35227916 | PIGQ      | 16 | 565960 | 2 | 5.488682 |
| rs1045274  | PIGQ      | 16 | 570903 | 1 | 5.066921 |
| rs1045274  | PIGQ      | 16 | 570903 | 3 | 0.069551 |
| rs2269557  | RAB40C    | 16 | 617630 | 6 | 5.32469  |
| rs2269557  | RAB40C    | 16 | 617630 | 5 | 0.381745 |
| rs2269557  | RAB40C    | 16 | 617630 | 4 | 0.810697 |
| rs2269557  | RAB40C    | 16 | 617630 | 1 | 4.446559 |

|              |          |    |         |   |          |
|--------------|----------|----|---------|---|----------|
| SNP16-638252 | C16orf14 | 16 | 638252  | 1 | 2.802906 |
| rs13337278   | WDR90    | 16 | 640645  | 6 | 0.500832 |
| rs11642546   | WDR90    | 16 | 641657  | 1 | 0.639945 |
| SNP16-645361 | WDR90    | 16 | 645361  | 4 | 0.756426 |
| SNP16-645361 | WDR90    | 16 | 645361  | 6 | 0.125169 |
| SNP16-645361 | WDR90    | 16 | 645361  | 1 | 4.244731 |
| SNP16-645361 | WDR90    | 16 | 645361  | 5 | 0.155873 |
| rs28485323   | WDR90    | 16 | 646535  | 1 | 3.070174 |
| rs28485323   | WDR90    | 16 | 646535  | 5 | 0.70425  |
| rs28485323   | WDR90    | 16 | 646535  | 4 | 0.921995 |
| SNP16-648276 | WDR90    | 16 | 648276  | 4 | 0.146865 |
| SNP16-648276 | WDR90    | 16 | 648276  | 1 | 4.901245 |
| SNP16-648276 | WDR90    | 16 | 648276  | 5 | 0.281337 |
| rs4984906    | WDR90    | 16 | 649002  | 1 | 0.503639 |
| rs4984906    | WDR90    | 16 | 649002  | 5 | 0.265137 |
| rs2301426    | WDR90    | 16 | 651906  | 5 | 0.488358 |
| SNP16-655991 | WDR90    | 16 | 655991  | 4 | 2.401318 |
| SNP16-655991 | WDR90    | 16 | 655991  | 5 | 0.040294 |
| SNP16-655991 | WDR90    | 16 | 655991  | 1 | 2.723488 |
| SNP16-655991 | WDR90    | 16 | 655991  | 6 | 0.130417 |
| rs9934288    | WDR90    | 16 | 656288  | 6 | 5.071492 |
| rs11557858   | RHOT2    | 16 | 659593  | 6 | 1.57853  |
| rs3743912    | RHOT2    | 16 | 660961  | 6 | 4.816232 |
| rs1139897    | RHOT2    | 16 | 660987  | 1 | 3.119322 |
| rs1139897    | RHOT2    | 16 | 660987  | 4 | 1.119286 |
| rs1139897    | RHOT2    | 16 | 660987  | 5 | 2.401431 |
| SNP16-662332 | RHOT2    | 16 | 662332  | 4 | 4.80376  |
| SNP16-662332 | RHOT2    | 16 | 662332  | 5 | 2.133713 |
| SNP16-662332 | RHOT2    | 16 | 662332  | 1 | 3.565364 |
| SNP16-662332 | RHOT2    | 16 | 662332  | 6 | 0.468901 |
| rs4984683    | FBXL16   | 16 | 686885  | 5 | 0.809339 |
| rs4984683    | FBXL16   | 16 | 686885  | 4 | 0.19027  |
| rs4984683    | FBXL16   | 16 | 686885  | 1 | 3.594942 |
| rs12599130   | CCDC78   | 16 | 712843  | 6 | 0.330857 |
| rs12599130   | CCDC78   | 16 | 712843  | 4 | 0.708802 |
| rs12599130   | CCDC78   | 16 | 712843  | 5 | 0.044629 |
| rs12599130   | CCDC78   | 16 | 712843  | 1 | 4.224697 |
| rs2071950    | CCDC78   | 16 | 714693  | 5 | 0.181523 |
| SNP16-758560 | MSLN     | 16 | 758560  | 8 | 0.096566 |
| SNP16-758560 | MSLN     | 16 | 758560  | 6 | 2.061692 |
| rs3765263    | CHTF18   | 16 | 780379  | 1 | 1.54     |
| rs3765265    | CHTF18   | 16 | 780598  | 1 | 3.921904 |
| rs1065368    | SOX8     | 16 | 976861  | 3 | 0.286958 |
| rs1065368    | SOX8     | 16 | 976861  | 8 | 6.546796 |
| rs1065368    | SOX8     | 16 | 976861  | 4 | 5.18155  |
| rs1065368    | SOX8     | 16 | 976861  | 1 | 4.994851 |
| rs2076422    | C1QTNF8  | 16 | 1086229 | 5 | 2.74813  |



|            |           |    |         |   |          |
|------------|-----------|----|---------|---|----------|
| rs8044363  | CACNA1H   | 16 | 1190560 | 5 | 0.985924 |
| rs8044363  | CACNA1H   | 16 | 1190560 | 8 | 0.977733 |
| rs8044363  | CACNA1H   | 16 | 1190560 | 4 | 0.925068 |
| rs8044363  | CACNA1H   | 16 | 1190560 | 1 | 1.105327 |
| rs4984636  | CACNA1H   | 16 | 1192442 | 1 | 1.958485 |
| rs1054645  | CACNA1H   | 16 | 1210163 | 3 | 0.467346 |
| rs4247094  | CACNA1H   | 16 | 1210350 | 5 | 1.645156 |
| GA030918   | CACNA1H   | 16 | 1211190 | 3 | 0.14147  |
| GA030918   | CACNA1H   | 16 | 1211190 | 6 | 2.122504 |
| GA030918   | CACNA1H   | 16 | 1211190 | 5 | 1.078817 |
| rs1004041  | TPSG1     | 16 | 1211891 | 1 | 0.593712 |
| rs1004041  | TPSG1     | 16 | 1211891 | 3 | 0.378773 |
| rs1004041  | TPSG1     | 16 | 1211891 | 5 | 0.61408  |
| rs11248860 | TPSG1     | 16 | 1212039 | 6 | 1.133617 |
| rs11248860 | TPSG1     | 16 | 1212039 | 5 | 1.012506 |
| rs1139155  | TPSB2     | 16 | 1218635 | 3 | 0.390136 |
| rs11866635 | BAIAP3    | 16 | 1331133 | 1 | 2.099226 |
| rs1132356  | BAIAP3    | 16 | 1334508 | 3 | 0.488556 |
| rs1132358  | BAIAP3    | 16 | 1337816 | 1 | 0.618835 |
| rs1132358  | BAIAP3    | 16 | 1337816 | 7 | 0.808584 |
| rs1132358  | BAIAP3    | 16 | 1337816 | 5 | 0.384745 |
| rs4984817  | BAIAP3    | 16 | 1338819 | 3 | 1.163976 |
| rs4984817  | BAIAP3    | 16 | 1338819 | 7 | 0.478758 |
| rs11865640 | NULL      | 16 | 1355300 | 1 | 7.23905  |
| rs12935737 | CLCN7     | 16 | 1444438 | 3 | 0.42495  |
| rs2745097  | LOC390667 | 16 | 1476500 | 7 | 0.5154   |
| rs2235624  | TELO2     | 16 | 1485449 | 5 | 0.117179 |
| rs2235624  | TELO2     | 16 | 1485449 | 8 | 0.380018 |
| rs2235624  | TELO2     | 16 | 1485449 | 3 | 0.673164 |
| rs3180228  | TELO2     | 16 | 1499839 | 1 | 2.300833 |
| rs3180228  | TELO2     | 16 | 1499839 | 5 | 1.146832 |
| rs3180228  | TELO2     | 16 | 1499839 | 3 | 0.551534 |
| rs9922661  | TMEM204   | 16 | 1545164 | 1 | 4.167515 |
| rs9922661  | TMEM204   | 16 | 1545164 | 3 | 0.771837 |
| rs9922661  | TMEM204   | 16 | 1545164 | 5 | 0.947785 |
| rs9922661  | TMEM204   | 16 | 1545164 | 7 | 2.300277 |
| rs1057610  | TMEM204   | 16 | 1545538 | 3 | 0.375779 |
| rs1057610  | TMEM204   | 16 | 1545538 | 5 | 0.776547 |
| rs1057610  | TMEM204   | 16 | 1545538 | 7 | 1.389908 |
| rs1057610  | TMEM204   | 16 | 1545538 | 1 | 5.125999 |
| rs1894649  | IFT140    | 16 | 1597285 | 3 | 1.247546 |
| rs1894649  | IFT140    | 16 | 1597285 | 7 | 0.813318 |
| rs1894649  | IFT140    | 16 | 1597285 | 5 | 0.629413 |
| rs1894649  | IFT140    | 16 | 1597285 | 1 | 3.053956 |
| rs2294616  | MAPK8IP3  | 16 | 1752973 | 3 | 0.447882 |
| rs2294619  | MAPK8IP3  | 16 | 1754441 | 5 | 1.144525 |
| rs344359   | NUBP2     | 16 | 1778641 | 2 | 0.207662 |

|               |           |    |         |   |          |
|---------------|-----------|----|---------|---|----------|
| rs344359      | NUBP2     | 16 | 1778641 | 1 | 0.329235 |
| rs344359      | NUBP2     | 16 | 1778641 | 5 | 7.532146 |
| rs3751893     | IGFALS    | 16 | 1782210 | 1 | 1.913056 |
| rs3751893     | IGFALS    | 16 | 1782210 | 2 | 1.830684 |
| rs3751893     | IGFALS    | 16 | 1782210 | 5 | 1.524612 |
| rs3817902     | IGFALS    | 16 | 1783673 | 5 | 0.608995 |
| rs3817902     | IGFALS    | 16 | 1783673 | 3 | 0.486363 |
| rs3817902     | IGFALS    | 16 | 1783673 | 1 | 0.503787 |
| rs1057070     | HAGH      | 16 | 1799154 | 1 | 2.106979 |
| rs28364709    | HAGH      | 16 | 1817176 | 1 | 7.153746 |
| rs3743852     | FAHD1     | 16 | 1817699 | 5 | 0.304132 |
| rs3743852     | FAHD1     | 16 | 1817699 | 3 | 0.584167 |
| rs3813760     | FAHD1     | 16 | 1829646 | 1 | 4.665915 |
| rs3848348     | FAHD1     | 16 | 1830057 | 1 | 3.313163 |
| rs9806826     | C16orf73  | 16 | 1834913 | 3 | 0.560039 |
| rs9806826     | C16orf73  | 16 | 1834913 | 5 | 0.39141  |
| rs9806826     | C16orf73  | 16 | 1834913 | 1 | 1.75315  |
| rs9806945     | C16orf73  | 16 | 1834962 | 1 | 2.02681  |
| rs8055325     | HS3ST6    | 16 | 1902133 | 1 | 3.798695 |
| rs8055325     | HS3ST6    | 16 | 1902133 | 3 | 2.297766 |
| SNP16-1970128 | NOXO1     | 16 | 1970128 | 8 | 0.263734 |
| SNP16-1975869 | GFER      | 16 | 1975869 | 8 | 4.71252  |
| SNP16-1975869 | GFER      | 16 | 1975869 | 5 | 0.485299 |
| rs11860328    | GFER      | 16 | 1977596 | 2 | 1.063178 |
| SNP16-1989004 | ZNF598    | 16 | 1989004 | 8 | 0.957862 |
| SNP16-1989004 | ZNF598    | 16 | 1989004 | 2 | 3.382631 |
| SNP16-1989004 | ZNF598    | 16 | 1989004 | 5 | 0.725005 |
| rs11248905    | ZNF598    | 16 | 1989729 | 8 | 5.038267 |
| rs11556528    | ZNF598    | 16 | 1990193 | 2 | 1.364465 |
| rs11556528    | ZNF598    | 16 | 1990193 | 8 | 0.270868 |
| rs41292293    | SLC9A3R2  | 16 | 2026967 | 1 | 5.140484 |
| GA012845      | SLC9A3R2  | 16 | 2028411 | 2 | 3.35068  |
| rs34012042    | TSC2      | 16 | 2054408 | 7 | 4.465786 |
| rs45498900    | TSC2      | 16 | 2078683 | 5 | 0.863524 |
| rs3087631     | PKD1      | 16 | 2079128 | 4 | 0.699237 |
| rs26862       | GBL       | 16 | 2197106 | 3 | 0.230853 |
| rs26862       | GBL       | 16 | 2197106 | 4 | 0.686907 |
| SNP16-2200568 | C16orf79  | 16 | 2200568 | 3 | 0.540947 |
| SNP16-2200568 | C16orf79  | 16 | 2200568 | 7 | 0.279244 |
| SNP16-2200613 | C16orf79  | 16 | 2200613 | 7 | 0.255237 |
| SNP16-2200613 | C16orf79  | 16 | 2200613 | 3 | 1.150489 |
| rs1126        | LOC283871 | 16 | 2202114 | 7 | 0.519446 |
| rs1126        | LOC283871 | 16 | 2202114 | 4 | 0.469757 |
| rs1126        | LOC283871 | 16 | 2202114 | 3 | 0.046122 |
| rs149532      | ABCA3     | 16 | 2271431 | 1 | 3.349579 |
| rs323043      | ABCA3     | 16 | 2288529 | 6 | 3.253562 |
| rs323043      | ABCA3     | 16 | 2288529 | 5 | 0.237899 |

|               |           |    |         |   |          |
|---------------|-----------|----|---------|---|----------|
| rs17758402    | LOC441744 | 16 | 2322355 | 3 | 0.402434 |
| rs4332747     | ABCA17    | 16 | 2400424 | 4 | 3.637478 |
| rs10866       | PDPK1     | 16 | 2587877 | 7 | 0.845797 |
| GA012858      | PDPK1     | 16 | 2591815 | 1 | 4.386871 |
| SNP16-2820746 | LOC124220 | 16 | 2820746 | 6 | 0.508604 |
| SNP16-2820746 | LOC124220 | 16 | 2820746 | 1 | 4.544541 |
| rs886953      | LOC124220 | 16 | 2822268 | 2 | 1.825318 |
| rs886953      | LOC124220 | 16 | 2822268 | 5 | 1.963545 |
| rs886953      | LOC124220 | 16 | 2822268 | 1 | 1.587729 |
| rs886953      | LOC124220 | 16 | 2822268 | 4 | 0.638954 |
| rs886953      | LOC124220 | 16 | 2822268 | 3 | 2.43495  |
| rs886953      | LOC124220 | 16 | 2822268 | 6 | 2.136633 |
| rs12786       | PRSS22    | 16 | 2842833 | 8 | 4.32111  |
| rs12786       | PRSS22    | 16 | 2842833 | 4 | 0.153996 |
| rs12786       | PRSS22    | 16 | 2842833 | 6 | 1.177764 |
| rs12786       | PRSS22    | 16 | 2842833 | 2 | 4.986504 |
| rs12786       | PRSS22    | 16 | 2842833 | 7 | 5.169744 |
| rs1063677     | FLYWCH2   | 16 | 2885249 | 7 | 0.548353 |
| rs1063677     | FLYWCH2   | 16 | 2885249 | 4 | 7.491523 |
| rs9673618     | LOC729718 | 16 | 2892424 | 7 | 0.224838 |
| rs9673618     | LOC729718 | 16 | 2892424 | 4 | 0.398875 |
| rs2074365     | FLYWCH1   | 16 | 2904284 | 6 | 0.748629 |
| rs2074365     | FLYWCH1   | 16 | 2904284 | 8 | 3.788945 |
| rs2074365     | FLYWCH1   | 16 | 2904284 | 4 | 1.25664  |
| rs8064223     | CLDN6     | 16 | 3004864 | 4 | 0.372411 |
| rs8064223     | CLDN6     | 16 | 3004864 | 8 | 4.446899 |
| rs8064223     | CLDN6     | 16 | 3004864 | 7 | 3.879023 |
| rs2269911     | CLDN6     | 16 | 3005925 | 7 | 5.679938 |
| rs2269911     | CLDN6     | 16 | 3005925 | 2 | 0.57214  |
| rs2269911     | CLDN6     | 16 | 3005925 | 8 | 0.031387 |
| rs10508       | HCFC1R1   | 16 | 3013241 | 8 | 5.88358  |
| rs10508       | HCFC1R1   | 16 | 3013241 | 5 | 0.288293 |
| rs10508       | HCFC1R1   | 16 | 3013241 | 7 | 0.613928 |
| SNP16-3019686 | CCDC64B   | 16 | 3019686 | 5 | 0.647028 |
| SNP16-3019686 | CCDC64B   | 16 | 3019686 | 8 | 7.446038 |
| SNP16-3019686 | CCDC64B   | 16 | 3019686 | 1 | 4.479336 |
| SNP16-3019686 | CCDC64B   | 16 | 3019686 | 6 | 5.861197 |
| rs11862977    | CCDC64B   | 16 | 3021319 | 2 | 2.244532 |
| rs11862977    | CCDC64B   | 16 | 3021319 | 8 | 1.488579 |
| rs11862977    | CCDC64B   | 16 | 3021319 | 7 | 0.518044 |
| rs11862977    | CCDC64B   | 16 | 3021319 | 5 | 1.413332 |
| SNP16-3025336 | CCDC64B   | 16 | 3025336 | 1 | 3.037859 |
| SNP16-3025336 | CCDC64B   | 16 | 3025336 | 8 | 5.379934 |
| SNP16-3025336 | CCDC64B   | 16 | 3025336 | 5 | 4.43848  |
| rs10431961    | NULL      | 16 | 3040096 | 5 | 0.84577  |
| rs10431961    | NULL      | 16 | 3040096 | 1 | 0.989304 |
| rs10431961    | NULL      | 16 | 3040096 | 6 | 5.441366 |

|               |          |    |         |   |          |
|---------------|----------|----|---------|---|----------|
| rs10431961    | NULL     | 16 | 3040096 | 2 | 1.110052 |
| rs1064948     | NULL     | 16 | 3046995 | 5 | 5.443422 |
| rs1064948     | NULL     | 16 | 3046995 | 4 | 1.159275 |
| rs1064948     | NULL     | 16 | 3046995 | 7 | 5.836298 |
| rs11228       | ZNF200   | 16 | 3212392 | 5 | 0.126985 |
| rs11228       | ZNF200   | 16 | 3212392 | 6 | 0.358382 |
| rs224206      | MEFV     | 16 | 3237074 | 1 | 1.328368 |
| rs224206      | MEFV     | 16 | 3237074 | 5 | 0.359527 |
| rs224207      | MEFV     | 16 | 3237176 | 5 | 0.52572  |
| rs224208      | MEFV     | 16 | 3237182 | 5 | 1.031435 |
| rs224213      | MEFV     | 16 | 3239750 | 1 | 1.491962 |
| rs224213      | MEFV     | 16 | 3239750 | 5 | 0.192223 |
| rs220379      | ZNF263   | 16 | 3279436 | 7 | 0.422122 |
| rs220380      | ZNF263   | 16 | 3280846 | 7 | 0.748842 |
| rs1228348     | OR2C1    | 16 | 3345995 | 3 | 0.980515 |
| rs27241       | ZNF434   | 16 | 3387283 | 7 | 1.357475 |
| rs27241       | ZNF434   | 16 | 3387283 | 1 | 6.216853 |
| rs37810       | ZNF174   | 16 | 3391882 | 7 | 0.150543 |
| rs37810       | ZNF174   | 16 | 3391882 | 1 | 2.777591 |
| rs37824       | ZNF597   | 16 | 3426237 | 7 | 2.018432 |
| rs37824       | ZNF597   | 16 | 3426237 | 1 | 6.899368 |
| rs1137454     | FLJ14154 | 16 | 3473578 | 7 | 0.302232 |
| SNP16-3534317 | NLRC3    | 16 | 3534317 | 3 | 1.92965  |
| rs3810813     | BTBD12   | 16 | 3579828 | 3 | 0.552587 |
| rs3810813     | BTBD12   | 16 | 3579828 | 2 | 4.842103 |
| rs8061528     | BTBD12   | 16 | 3596483 | 2 | 2.767886 |
| rs8061528     | BTBD12   | 16 | 3596483 | 3 | 0.21843  |
| rs8061528     | BTBD12   | 16 | 3596483 | 4 | 0.192823 |
| rs1136948     | TRAP1    | 16 | 3661774 | 4 | 1.6444   |
| rs1136948     | TRAP1    | 16 | 3661774 | 7 | 3.371143 |
| rs1136948     | TRAP1    | 16 | 3661774 | 3 | 0.065166 |
| rs2240668     | SRL      | 16 | 4180908 | 2 | 0.963274 |
| rs2240668     | SRL      | 16 | 4180908 | 7 | 2.313064 |
| rs10852642    | SRL      | 16 | 4182029 | 5 | 0.372268 |
| rs10852642    | SRL      | 16 | 4182029 | 8 | 0.769118 |
| rs10852642    | SRL      | 16 | 4182029 | 1 | 3.167233 |
| rs10852642    | SRL      | 16 | 4182029 | 7 | 0.709065 |
| rs8051399     | SRL      | 16 | 4182094 | 7 | 0.590242 |
| rs8051399     | SRL      | 16 | 4182094 | 1 | 2.754346 |
| rs8051399     | SRL      | 16 | 4182094 | 4 | 0.464692 |
| rs10852643    | SRL      | 16 | 4185694 | 5 | 0.43239  |
| rs10852643    | SRL      | 16 | 4185694 | 1 | 1.271325 |
| rs10852643    | SRL      | 16 | 4185694 | 7 | 0.35061  |
| rs868302      | SRL      | 16 | 4197687 | 3 | 0.148587 |
| rs2304633     | DNAJA3   | 16 | 4436974 | 8 | 0.060924 |
| rs2304633     | DNAJA3   | 16 | 4436974 | 6 | 0.892107 |
| rs2304633     | DNAJA3   | 16 | 4436974 | 5 | 0.09036  |

|               |           |    |         |   |          |
|---------------|-----------|----|---------|---|----------|
| rs2304633     | DNAJA3    | 16 | 4436974 | 7 | 0.058452 |
| rs17137053    | NMRAL1    | 16 | 4464156 | 5 | 0.437868 |
| rs17137056    | NMRAL1    | 16 | 4464686 | 5 | 5.70069  |
| rs8129        | C16orf5   | 16 | 4502352 | 8 | 7.500759 |
| rs8129        | C16orf5   | 16 | 4502352 | 7 | 0.197442 |
| rs8129        | C16orf5   | 16 | 4502352 | 1 | 4.992277 |
| rs8129        | C16orf5   | 16 | 4502352 | 6 | 7.428606 |
| rs7665        | C16orf5   | 16 | 4502513 | 7 | 0.257183 |
| rs7665        | C16orf5   | 16 | 4502513 | 1 | 5.686936 |
| rs7665        | C16orf5   | 16 | 4502513 | 6 | 8.780749 |
| rs7195763     | LOC342346 | 16 | 4589301 | 5 | 0.872209 |
| rs3747587     | MGRN1     | 16 | 4614955 | 6 | 0.3003   |
| rs3747587     | MGRN1     | 16 | 4614955 | 8 | 5.711292 |
| rs863980      | ANKS3     | 16 | 4691046 | 4 | 3.236825 |
| rs863980      | ANKS3     | 16 | 4691046 | 6 | 1.060014 |
| rs863980      | ANKS3     | 16 | 4691046 | 8 | 5.387583 |
| rs863980      | ANKS3     | 16 | 4691046 | 3 | 0.713351 |
| rs863980      | ANKS3     | 16 | 4691046 | 5 | 0.586333 |
| rs859305      | C16orf71  | 16 | 4730274 | 4 | 1.634698 |
| rs859305      | C16orf71  | 16 | 4730274 | 7 | 0.874973 |
| rs859305      | C16orf71  | 16 | 4730274 | 6 | 0.32073  |
| rs859305      | C16orf71  | 16 | 4730274 | 3 | 1.436498 |
| rs859305      | C16orf71  | 16 | 4730274 | 5 | 1.345899 |
| rs859305      | C16orf71  | 16 | 4730274 | 8 | 3.046746 |
| rs2075469     | C16orf71  | 16 | 4734874 | 4 | 0.16599  |
| rs2075469     | C16orf71  | 16 | 4734874 | 3 | 1.328665 |
| rs2075469     | C16orf71  | 16 | 4734874 | 8 | 0.911769 |
| rs2075469     | C16orf71  | 16 | 4734874 | 5 | 0.158637 |
| rs2075469     | C16orf71  | 16 | 4734874 | 7 | 1.327714 |
| rs737700      | C16orf71  | 16 | 4736394 | 7 | 2.772839 |
| rs737700      | C16orf71  | 16 | 4736394 | 3 | 0.695722 |
| rs737700      | C16orf71  | 16 | 4736394 | 8 | 1.043199 |
| rs737700      | C16orf71  | 16 | 4736394 | 6 | 2.158009 |
| rs737700      | C16orf71  | 16 | 4736394 | 5 | 2.285438 |
| rs737700      | C16orf71  | 16 | 4736394 | 4 | 1.307751 |
| GA012923      | C16orf71  | 16 | 4737458 | 5 | 1.516262 |
| GA012923      | C16orf71  | 16 | 4737458 | 3 | 0.029554 |
| GA012923      | C16orf71  | 16 | 4737458 | 4 | 6.439401 |
| GA012923      | C16orf71  | 16 | 4737458 | 1 | 2.323224 |
| rs2290560     | C16orf71  | 16 | 4739042 | 3 | 0.817728 |
| rs2290560     | C16orf71  | 16 | 4739042 | 1 | 6.354192 |
| rs2290560     | C16orf71  | 16 | 4739042 | 6 | 0.174173 |
| rs2290560     | C16orf71  | 16 | 4739042 | 7 | 1.070975 |
| rs2290560     | C16orf71  | 16 | 4739042 | 5 | 0.279911 |
| rs2290560     | C16orf71  | 16 | 4739042 | 4 | 0.496067 |
| SNP16-4752706 | ZNF500    | 16 | 4752706 | 1 | 6.164448 |
| rs759991      | 12-Sep    | 16 | 4773971 | 3 | 0.382307 |

|           |           |    |         |   |          |
|-----------|-----------|----|---------|---|----------|
| rs759991  | 12-Sep    | 16 | 4773971 | 4 | 3.104598 |
| rs759991  | 12-Sep    | 16 | 4773971 | 7 | 0.927299 |
| rs1045643 | UBN1      | 16 | 4871514 | 8 | 5.380241 |
| rs1049207 | PPL       | 16 | 4874565 | 1 | 5.525055 |
| rs2075639 | PPL       | 16 | 4875637 | 8 | 4.407935 |
| rs2286966 | SEC14L5   | 16 | 4990898 | 8 | 0.124249 |
| rs2286966 | SEC14L5   | 16 | 4990898 | 4 | 1.381478 |
| rs2286966 | SEC14L5   | 16 | 4990898 | 3 | 0.07967  |
| rs2286966 | SEC14L5   | 16 | 4990898 | 6 | 0.627422 |
| rs2286966 | SEC14L5   | 16 | 4990898 | 7 | 0.704339 |
| rs2286966 | SEC14L5   | 16 | 4990898 | 1 | 0.765735 |
| rs2972284 | SEC14L5   | 16 | 5008153 | 6 | 0.557313 |
| rs2072455 | SEC14L5   | 16 | 5008778 | 5 | 5.200843 |
| rs2072455 | SEC14L5   | 16 | 5008778 | 7 | 1.040886 |
| rs8055684 | MGC45438  | 16 | 5034571 | 3 | 0.165455 |
| rs9674145 | MGC45438  | 16 | 5037948 | 3 | 0.621222 |
| rs9674145 | MGC45438  | 16 | 5037948 | 4 | 0.29018  |
| rs9674145 | MGC45438  | 16 | 5037948 | 7 | 0.412163 |
| rs9674145 | MGC45438  | 16 | 5037948 | 6 | 0.871367 |
| rs9674145 | MGC45438  | 16 | 5037948 | 5 | 0.088617 |
| rs741164  | MGC45438  | 16 | 5046185 | 6 | 0.451278 |
| rs741164  | MGC45438  | 16 | 5046185 | 7 | 1.17466  |
| rs7198383 | LOC283953 | 16 | 8559751 | 4 | 1.47703  |
| rs7198383 | LOC283953 | 16 | 8559751 | 7 | 0.707081 |
| rs2270286 | C16orf68  | 16 | 8630130 | 4 | 0.302879 |
| rs2270286 | C16orf68  | 16 | 8630130 | 5 | 0.0887   |
| rs2270286 | C16orf68  | 16 | 8630130 | 3 | 0.118856 |
| rs2270286 | C16orf68  | 16 | 8630130 | 1 | 6.56909  |
| rs1731017 | ABAT      | 16 | 8747455 | 6 | 2.103433 |
| rs1731017 | ABAT      | 16 | 8747455 | 2 | 4.028867 |
| rs1731017 | ABAT      | 16 | 8747455 | 7 | 0.631037 |
| rs1731017 | ABAT      | 16 | 8747455 | 3 | 0.674839 |
| rs2270288 | ABAT      | 16 | 8783030 | 4 | 0.720856 |
| rs2270288 | ABAT      | 16 | 8783030 | 3 | 0.840604 |
| rs2270288 | ABAT      | 16 | 8783030 | 7 | 3.495833 |
| rs2270288 | ABAT      | 16 | 8783030 | 8 | 5.188134 |
| rs3743801 | ABAT      | 16 | 8783703 | 4 | 0.583056 |
| rs3743801 | ABAT      | 16 | 8783703 | 3 | 0.841567 |
| rs3743801 | ABAT      | 16 | 8783703 | 7 | 0.645999 |
| rs4985000 | ABAT      | 16 | 8783778 | 1 | 6.213716 |
| rs4985000 | ABAT      | 16 | 8783778 | 6 | 2.592554 |
| rs4985000 | ABAT      | 16 | 8783778 | 7 | 0.006754 |
| rs1061842 | ABAT      | 16 | 8784381 | 8 | 7.140268 |
| rs1061842 | ABAT      | 16 | 8784381 | 7 | 4.515437 |
| rs1061842 | ABAT      | 16 | 8784381 | 3 | 0.218838 |
| rs1061842 | ABAT      | 16 | 8784381 | 4 | 0.00781  |
| rs1061842 | ABAT      | 16 | 8784381 | 2 | 3.09945  |

|                |           |    |          |   |          |
|----------------|-----------|----|----------|---|----------|
| rs9456         | ABAT      | 16 | 8785092  | 8 | 4.855873 |
| rs9456         | ABAT      | 16 | 8785092  | 4 | 3.966244 |
| rs9456         | ABAT      | 16 | 8785092  | 1 | 0.057565 |
| rs9456         | ABAT      | 16 | 8785092  | 2 | 0.563822 |
| rs6898         | CARHSP1   | 16 | 8856475  | 1 | 4.120143 |
| rs1014531      | GRIN2A    | 16 | 9763295  | 1 | 1.187268 |
| rs12444387     | LOC727844 | 16 | 10038372 | 4 | 0.765716 |
| rs12444387     | LOC727844 | 16 | 10038372 | 7 | 0.482972 |
| rs12444387     | LOC727844 | 16 | 10038372 | 5 | 0.594459 |
| rs12444387     | LOC727844 | 16 | 10038372 | 6 | 1.472218 |
| rs4782258      | LOC727833 | 16 | 10112746 | 7 | 0.007355 |
| rs7188171      | LOC727833 | 16 | 10112913 | 1 | 4.973116 |
| rs7188171      | LOC727833 | 16 | 10112913 | 6 | 0.872688 |
| rs7188171      | LOC727833 | 16 | 10112913 | 5 | 3.241865 |
| rs9932051      | ATF7IP2   | 16 | 10482297 | 7 | 0.705231 |
| rs1970817      | ATF7IP2   | 16 | 10483325 | 5 | 0.544613 |
| rs1970817      | ATF7IP2   | 16 | 10483325 | 7 | 0.022452 |
| rs1970817      | ATF7IP2   | 16 | 10483325 | 3 | 1.454902 |
| rs2719710      | TEKT5     | 16 | 10677459 | 5 | 2.176795 |
| rs2719710      | TEKT5     | 16 | 10677459 | 7 | 1.362478 |
| rs2719710      | TEKT5     | 16 | 10677459 | 1 | 0.812774 |
| rs2719710      | TEKT5     | 16 | 10677459 | 2 | 0.465426 |
| rs12918646     | TEKT5     | 16 | 10683356 | 1 | 4.291086 |
| rs12918646     | TEKT5     | 16 | 10683356 | 5 | 1.665003 |
| SNP16-10770465 | NUBP1     | 16 | 10770465 | 1 | 3.7953   |
| SNP16-10770465 | NUBP1     | 16 | 10770465 | 5 | 0.007792 |
| SNP16-10770465 | NUBP1     | 16 | 10770465 | 6 | 0.165712 |
| rs4774         | CIITA     | 16 | 10908349 | 1 | 0.166243 |
| rs4774         | CIITA     | 16 | 10908349 | 2 | 0.374521 |
| rs4774         | CIITA     | 16 | 10908349 | 3 | 0.648645 |
| rs2229320      | CIITA     | 16 | 10909244 | 3 | 0.102175 |
| rs2229320      | CIITA     | 16 | 10909244 | 5 | 0.62915  |
| rs2286973      | CLEC16A   | 16 | 11062271 | 3 | 7.440396 |
| rs2286973      | CLEC16A   | 16 | 11062271 | 6 | 0.406026 |
| rs2286973      | CLEC16A   | 16 | 11062271 | 1 | 4.939555 |
| rs2286973      | CLEC16A   | 16 | 11062271 | 7 | 2.15961  |
| rs11647285     | CLEC16A   | 16 | 11180073 | 7 | 4.925854 |
| rs737008       | PRM1      | 16 | 11282367 | 3 | 0.179754 |
| rs4381620      | LOC388210 | 16 | 11385258 | 5 | 0.213249 |
| rs4381620      | LOC388210 | 16 | 11385258 | 6 | 0.227098 |
| rs1139052      | LOC388210 | 16 | 11385649 | 3 | 0.991098 |
| rs8058507      | LOC388210 | 16 | 11386346 | 4 | 0.404808 |
| rs8058507      | LOC388210 | 16 | 11386346 | 1 | 1.337714 |
| rs4502229      | LOC400499 | 16 | 11448261 | 7 | 0.178194 |
| rs4502229      | LOC400499 | 16 | 11448261 | 1 | 1.504818 |
| rs4502229      | LOC400499 | 16 | 11448261 | 5 | 0.589573 |
| rs8050530      | LOC400499 | 16 | 11462368 | 7 | 1.123522 |

|            |           |    |          |   |          |
|------------|-----------|----|----------|---|----------|
| rs8050530  | LOC400499 | 16 | 11462368 | 5 | 1.925729 |
| rs4781107  | LOC400499 | 16 | 11479920 | 7 | 0.444285 |
| rs4781110  | LOC400499 | 16 | 11490071 | 4 | 0.33959  |
| rs4781110  | LOC400499 | 16 | 11490071 | 7 | 0.066339 |
| rs4781110  | LOC400499 | 16 | 11490071 | 1 | 2.064889 |
| rs4781110  | LOC400499 | 16 | 11490071 | 3 | 0.381876 |
| rs4781110  | LOC400499 | 16 | 11490071 | 5 | 0.740915 |
| rs8052900  | RSL1D1    | 16 | 11847891 | 7 | 0.662341 |
| rs8052900  | RSL1D1    | 16 | 11847891 | 3 | 0.104316 |
| rs8052900  | RSL1D1    | 16 | 11847891 | 4 | 2.96352  |
| rs434762   | GSPT1     | 16 | 11917282 | 5 | 0.637815 |
| rs1641843  | LOC92017  | 16 | 12070470 | 7 | 0.52662  |
| rs1650996  | FLJ11151  | 16 | 12665747 | 8 | 0.130476 |
| rs3748983  | FLJ11151  | 16 | 12665760 | 3 | 0.178972 |
| rs9938751  | LOC440338 | 16 | 12909860 | 1 | 5.073069 |
| rs1800067  | ERCC4     | 16 | 13936534 | 7 | 2.325282 |
| rs1799801  | ERCC4     | 16 | 13949459 | 2 | 2.864585 |
| rs1799801  | ERCC4     | 16 | 13949459 | 4 | 6.483226 |
| rs30128    | MKL2      | 16 | 14264151 | 3 | 0.801257 |
| rs30128    | MKL2      | 16 | 14264151 | 6 | 4.003863 |
| rs30122    | MKL2      | 16 | 14266734 | 6 | 6.237354 |
| rs30122    | MKL2      | 16 | 14266734 | 3 | 0.172619 |
| rs35722504 | PARN      | 16 | 14448420 | 6 | 0.094558 |
| rs4985154  | PDXDC1    | 16 | 15039143 | 1 | 6.972501 |
| rs2740     | PDXDC1    | 16 | 15039609 | 1 | 5.033776 |
| rs2071332  | C16orf45  | 16 | 15588143 | 5 | 0.050844 |
| rs1050163  | MYH11     | 16 | 15718524 | 3 | 1.504681 |
| rs1050163  | MYH11     | 16 | 15718524 | 4 | 0.514327 |
| rs1050162  | MYH11     | 16 | 15718563 | 3 | 0.928121 |
| rs1050162  | MYH11     | 16 | 15718563 | 4 | 0.520173 |
| rs2075511  | NDE1      | 16 | 15725642 | 1 | 1.697992 |
| rs2075511  | NDE1      | 16 | 15725642 | 4 | 0.408472 |
| rs2075511  | NDE1      | 16 | 15725642 | 3 | 0.635818 |
| rs16967494 | MYH11     | 16 | 15728364 | 4 | 0.929644 |
| rs16967494 | MYH11     | 16 | 15728364 | 3 | 0.607625 |
| rs12931799 | MYH11     | 16 | 15749274 | 2 | 4.518111 |
| rs880071   | MYH11     | 16 | 15749524 | 1 | 0.18866  |
| rs2272554  | MYH11     | 16 | 15757705 | 4 | 1.036503 |
| rs2272554  | MYH11     | 16 | 15757705 | 3 | 1.530257 |
| rs2272554  | MYH11     | 16 | 15757705 | 1 | 1.308734 |
| rs35587    | ABCC1     | 16 | 16047215 | 8 | 2.077572 |
| rs35605    | ABCC1     | 16 | 16069520 | 8 | 2.161936 |
| rs35605    | ABCC1     | 16 | 16069520 | 4 | 0.632469 |
| rs8187858  | ABCC1     | 16 | 16069540 | 2 | 3.826755 |
| GA013073   | ABCC1     | 16 | 16080733 | 3 | 0.581018 |
| rs129081   | ABCC1     | 16 | 16143440 | 5 | 0.725041 |
| rs129081   | ABCC1     | 16 | 16143440 | 4 | 0.517435 |



|                |           |    |          |   |          |
|----------------|-----------|----|----------|---|----------|
| rs2238472      | ABCC6     | 16 | 16159100 | 6 | 0.055313 |
| rs2238472      | ABCC6     | 16 | 16159100 | 1 | 3.544744 |
| rs2238472      | ABCC6     | 16 | 16159100 | 5 | 0.408237 |
| rs9930886      | ABCC6     | 16 | 16199484 | 3 | 0.719171 |
| rs28709752     | XYLT1     | 16 | 17199575 | 4 | 3.149134 |
| rs17663059     | RPS15A    | 16 | 18709084 | 6 | 1.504014 |
| rs17663059     | RPS15A    | 16 | 18709084 | 1 | 4.921379 |
| SNP16-18949096 | TMC7      | 16 | 18949096 | 5 | 6.68253  |
| SNP16-18949096 | TMC7      | 16 | 18949096 | 6 | 3.953487 |
| rs35480813     | COQ7      | 16 | 18986538 | 6 | 0.25463  |
| rs35480813     | COQ7      | 16 | 18986538 | 4 | 0.493142 |
| rs35480813     | COQ7      | 16 | 18986538 | 2 | 1.816534 |
| rs1548450      | LOC728276 | 16 | 19217593 | 3 | 1.858509 |
| rs1548450      | LOC728276 | 16 | 19217593 | 4 | 1.337749 |
| SNP16-19379072 | TMC5      | 16 | 19379072 | 3 | 5.973903 |
| SNP16-19382600 | TMC5      | 16 | 19382600 | 1 | 4.785526 |
| rs2147865      | GPR139    | 16 | 19950831 | 3 | 0.033496 |
| rs28544423     | UMOD      | 16 | 20267134 | 6 | 1.503626 |
| rs13335818     | UMOD      | 16 | 20267332 | 7 | 0.701328 |
| rs13335818     | UMOD      | 16 | 20267332 | 1 | 0.503344 |
| rs3743690      | ACSM1     | 16 | 20542919 | 6 | 0.461366 |
| rs3743690      | ACSM1     | 16 | 20542919 | 2 | 4.975679 |
| rs1136268      | THUMPD1   | 16 | 20654605 | 5 | 6.004176 |
| rs11074471     | THUMPD1   | 16 | 20655832 | 5 | 0.665165 |
| rs5710         | LOC730079 | 16 | 20682804 | 5 | 0.220114 |
| rs5716         | ACSM3     | 16 | 20703888 | 5 | 0.222987 |
| rs11648835     | NULL      | 16 | 20716784 | 5 | 1.012732 |
| rs7187522      | DCUN1D3   | 16 | 20781268 | 2 | 0.037802 |
| rs7187522      | DCUN1D3   | 16 | 20781268 | 8 | 0.367153 |
| rs7187522      | DCUN1D3   | 16 | 20781268 | 7 | 3.540801 |
| SNP16-20867419 | DNAH3     | 16 | 20867419 | 5 | 0.723553 |
| rs3743697      | DNAH3     | 16 | 20882804 | 5 | 0.340883 |
| SNP16-20883861 | DNAH3     | 16 | 20883861 | 5 | 1.049078 |
| rs12929546     | DNAH3     | 16 | 20888663 | 7 | 3.286825 |
| rs12929546     | DNAH3     | 16 | 20888663 | 5 | 0.762519 |
| rs330150       | DNAH3     | 16 | 20958710 | 4 | 0.114144 |
| SNP16-21046572 | DNAH3     | 16 | 21046572 | 1 | 3.803695 |
| SNP16-21059414 | DNAH3     | 16 | 21059414 | 8 | 0.005582 |
| rs226058       | LOC646823 | 16 | 21220184 | 5 | 1.835808 |
| rs226058       | LOC646823 | 16 | 21220184 | 3 | 1.098455 |
| rs1055740      | IGSF6     | 16 | 21560221 | 5 | 0.426863 |
| SNP16-21562393 | IGSF6     | 16 | 21562393 | 6 | 0.126146 |
| rs1105929      | VWA3A     | 16 | 22051819 | 7 | 0.87578  |
| rs9937453      | VWA3A     | 16 | 22063130 | 7 | 1.033531 |
| rs9937453      | VWA3A     | 16 | 22063130 | 1 | 3.090833 |
| rs17841292     | EEF2K     | 16 | 22144774 | 8 | 5.337849 |
| rs2290829      | EEF2K     | 16 | 22203987 | 7 | 0.054483 |

|                |          |    |          |   |          |
|----------------|----------|----|----------|---|----------|
| rs2290829      | EEF2K    | 16 | 22203987 | 8 | 4.962906 |
| rs208951       | HS3ST2   | 16 | 22733840 | 3 | 1.947254 |
| rs208951       | HS3ST2   | 16 | 22733840 | 2 | 3.504629 |
| rs5737         | SCNN1G   | 16 | 23108424 | 2 | 3.245561 |
| rs5723         | SCNN1G   | 16 | 23134288 | 1 | 3.745595 |
| rs5726         | SCNN1G   | 16 | 23134527 | 4 | 4.580538 |
| rs5729         | SCNN1G   | 16 | 23134897 | 3 | 0.718498 |
| rs5729         | SCNN1G   | 16 | 23134897 | 4 | 2.182971 |
| rs5729         | SCNN1G   | 16 | 23134897 | 1 | 3.992372 |
| rs250587       | COG7     | 16 | 23307695 | 5 | 5.203601 |
| rs2285521      | GGA2     | 16 | 23429281 | 5 | 0.297771 |
| rs6497671      | EARS2    | 16 | 23444185 | 5 | 0.595992 |
| rs7187920      | EARS2    | 16 | 23471002 | 3 | 0.553834 |
| rs7187920      | EARS2    | 16 | 23471002 | 5 | 0.270315 |
| rs26764        | ERN2     | 16 | 23619426 | 1 | 0.809419 |
| rs3809682      | ERN2     | 16 | 23632254 | 5 | 1.059339 |
| rs3809682      | ERN2     | 16 | 23632254 | 6 | 0.792584 |
| rs11646957     | CACNG3   | 16 | 24174810 | 4 | 0.030388 |
| rs11646957     | CACNG3   | 16 | 24174810 | 1 | 1.763952 |
| rs11646957     | CACNG3   | 16 | 24174810 | 5 | 3.422715 |
| rs9922288      | RBBP6    | 16 | 24458431 | 1 | 0.636918 |
| rs9922288      | RBBP6    | 16 | 24458431 | 7 | 0.193886 |
| rs11639856     | TNRC6A   | 16 | 24696146 | 4 | 0.404368 |
| SNP16-24708398 | TNRC6A   | 16 | 24708398 | 3 | 0.316774 |
| SNP16-24708398 | TNRC6A   | 16 | 24708398 | 7 | 0.530026 |
| rs6497759      | TNRC6A   | 16 | 24709238 | 4 | 1.072247 |
| rs13336754     | TNRC6A   | 16 | 24709480 | 2 | 1.775146 |
| rs13336754     | TNRC6A   | 16 | 24709480 | 6 | 0.237167 |
| rs3803716      | TNRC6A   | 16 | 24709826 | 4 | 0.069844 |
| rs17772929     | SLC5A11  | 16 | 24825549 | 2 | 2.439055 |
| rs17772929     | SLC5A11  | 16 | 24825549 | 6 | 0.581288 |
| rs17772929     | SLC5A11  | 16 | 24825549 | 4 | 0.864516 |
| rs2277961      | ZKSCAN2  | 16 | 25155265 | 7 | 6.358545 |
| rs2277961      | ZKSCAN2  | 16 | 25155265 | 6 | 5.981357 |
| rs7184511      | ZKSCAN2  | 16 | 25156872 | 2 | 4.722036 |
| rs7184511      | ZKSCAN2  | 16 | 25156872 | 6 | 7.650516 |
| rs8059494      | ZKSCAN2  | 16 | 25162743 | 7 | 0.564307 |
| rs8059494      | ZKSCAN2  | 16 | 25162743 | 6 | 6.881676 |
| rs11642611     | ZKSCAN2  | 16 | 25163007 | 7 | 0.118888 |
| rs11642611     | ZKSCAN2  | 16 | 25163007 | 2 | 8.236369 |
| rs11649280     | ZKSCAN2  | 16 | 25165536 | 7 | 0.300967 |
| rs3803711      | HS3ST4   | 16 | 26055412 | 1 | 2.688807 |
| rs3803711      | HS3ST4   | 16 | 26055412 | 3 | 0.251385 |
| rs2280183      | C16orf82 | 16 | 26987458 | 5 | 0.604417 |
| rs11823        | C16orf82 | 16 | 26987807 | 5 | 1.180462 |
| rs1134367      | JMJD5    | 16 | 27140384 | 6 | 6.032052 |
| rs1134367      | JMJD5    | 16 | 27140384 | 3 | 0.878225 |

|                |           |    |          |   |          |
|----------------|-----------|----|----------|---|----------|
| rs1134367      | JMJD5     | 16 | 27140384 | 7 | 0.802094 |
| rs1134367      | JMJD5     | 16 | 27140384 | 8 | 0.343099 |
| rs1134367      | JMJD5     | 16 | 27140384 | 4 | 5.014609 |
| SNP16-27154118 | NSMCE1    | 16 | 27154118 | 3 | 0.018442 |
| SNP16-27154118 | NSMCE1    | 16 | 27154118 | 1 | 2.014675 |
| rs3024633      | IL4R      | 16 | 27274000 | 6 | 0.54893  |
| rs3024633      | IL4R      | 16 | 27274000 | 8 | 2.615835 |
| rs2234924      | IL4R      | 16 | 27282740 | 6 | 0.71872  |
| rs2285452      | IL21R     | 16 | 27368398 | 8 | 0.338309 |
| rs2285452      | IL21R     | 16 | 27368398 | 3 | 1.503199 |
| rs2285452      | IL21R     | 16 | 27368398 | 4 | 0.706894 |
| rs2285452      | IL21R     | 16 | 27368398 | 2 | 1.596387 |
| rs2285452      | IL21R     | 16 | 27368398 | 1 | 0.4629   |
| rs2285452      | IL21R     | 16 | 27368398 | 7 | 0.215514 |
| rs3093387      | IL21R     | 16 | 27368569 | 2 | 1.030582 |
| rs3093387      | IL21R     | 16 | 27368569 | 1 | 0.184435 |
| rs3093387      | IL21R     | 16 | 27368569 | 7 | 0.722905 |
| rs3093387      | IL21R     | 16 | 27368569 | 8 | 2.235077 |
| rs3093387      | IL21R     | 16 | 27368569 | 3 | 0.880312 |
| rs3093410      | IL21R     | 16 | 27368903 | 5 | 1.167385 |
| rs3093412      | IL21R     | 16 | 27369022 | 2 | 1.59662  |
| rs12919017     | GTF3C1    | 16 | 27382411 | 1 | 3.051449 |
| rs12919017     | GTF3C1    | 16 | 27382411 | 7 | 1.839356 |
| rs12919017     | GTF3C1    | 16 | 27382411 | 8 | 0.219521 |
| rs11644502     | KIAA0556  | 16 | 27688810 | 7 | 0.094929 |
| rs2292646      | GSG1L     | 16 | 27709838 | 3 | 0.874251 |
| rs9939733      | LOC647001 | 16 | 28159357 | 5 | 0.005446 |
| rs9939733      | LOC647001 | 16 | 28159357 | 3 | 0.175089 |
| rs9939733      | LOC647001 | 16 | 28159357 | 1 | 0.500567 |
| rs11540497     | SBK1      | 16 | 28242495 | 1 | 3.841272 |
| rs151233       | APOB48R   | 16 | 28413929 | 5 | 0.561821 |
| rs151233       | APOB48R   | 16 | 28413929 | 7 | 0.735722 |
| rs149271       | APOB48R   | 16 | 28414373 | 1 | 1.369279 |
| rs180743       | APOB48R   | 16 | 28415145 | 1 | 0.198316 |
| rs40831        | APOB48R   | 16 | 28415948 | 1 | 2.267012 |
| rs40837        | IL27      | 16 | 28418346 | 1 | 1.134214 |
| rs181206       | IL27      | 16 | 28420904 | 1 | 1.264758 |
| rs11074908     | SULT1A2   | 16 | 28515857 | 7 | 2.50387  |
| rs2077412      | SULT1A1   | 16 | 28528812 | 1 | 5.884319 |
| rs2077412      | SULT1A1   | 16 | 28528812 | 4 | 0.232335 |
| rs2077412      | SULT1A1   | 16 | 28528812 | 5 | 1.631421 |
| rs2077412      | SULT1A1   | 16 | 28528812 | 3 | 1.718964 |
| rs2077412      | SULT1A1   | 16 | 28528812 | 8 | 0.950727 |
| rs2077412      | SULT1A1   | 16 | 28528812 | 6 | 4.171271 |
| rs7193733      | SH2B1     | 16 | 28782983 | 1 | 0.033812 |
| rs7193733      | SH2B1     | 16 | 28782983 | 8 | 0.334812 |
| rs7193733      | SH2B1     | 16 | 28782983 | 2 | 2.893339 |

|                |           |    |          |   |          |
|----------------|-----------|----|----------|---|----------|
| rs1131543      | LAT       | 16 | 28905498 | 5 | 0.01906  |
| rs1131543      | LAT       | 16 | 28905498 | 1 | 5.079443 |
| rs1646087      | LOC728804 | 16 | 29047272 | 3 | 0.837804 |
| rs889682       | LOC728809 | 16 | 29053044 | 7 | 2.223617 |
| rs889682       | LOC728809 | 16 | 29053044 | 2 | 1.23649  |
| rs889682       | LOC728809 | 16 | 29053044 | 3 | 1.199879 |
| rs2303255      | QPRT      | 16 | 29613945 | 6 | 4.398495 |
| rs2303255      | QPRT      | 16 | 29613945 | 2 | 4.240165 |
| rs2303255      | QPRT      | 16 | 29613945 | 7 | 0.766949 |
| rs2303255      | QPRT      | 16 | 29613945 | 3 | 0.590402 |
| rs1045968      | PRRT2     | 16 | 29733866 | 2 | 3.387184 |
| rs1045968      | PRRT2     | 16 | 29733866 | 6 | 0.733484 |
| SNP16-29891874 | LOC124446 | 16 | 29891874 | 1 | 0.636829 |
| SNP16-29891874 | LOC124446 | 16 | 29891874 | 7 | 0.226388 |
| rs3814883      | TAOK2     | 16 | 29902423 | 8 | 2.05786  |
| rs3814883      | TAOK2     | 16 | 29902423 | 2 | 4.325074 |
| rs3814883      | TAOK2     | 16 | 29902423 | 3 | 0.689105 |
| rs3814883      | TAOK2     | 16 | 29902423 | 6 | 0.065959 |
| rs1129003      | DOC2A     | 16 | 29924784 | 1 | 5.976987 |
| rs3935873      | DOC2A     | 16 | 29926001 | 6 | 1.797957 |
| rs12444973     | YPEL3     | 16 | 30014786 | 1 | 0.581318 |
| rs12444973     | YPEL3     | 16 | 30014786 | 7 | 0.344077 |
| rs12444973     | YPEL3     | 16 | 30014786 | 2 | 1.089103 |
| rs12444973     | YPEL3     | 16 | 30014786 | 6 | 2.664824 |
| rs7698         | MAPK3     | 16 | 30033301 | 1 | 3.672895 |
| rs7698         | MAPK3     | 16 | 30033301 | 8 | 7.408096 |
| rs7542         | MAPK3     | 16 | 30033341 | 2 | 6.257843 |
| rs7542         | MAPK3     | 16 | 30033341 | 8 | 6.5417   |
| rs7542         | MAPK3     | 16 | 30033341 | 6 | 4.797835 |
| rs7542         | MAPK3     | 16 | 30033341 | 3 | 0.013579 |
| rs1132812      | CORO1A    | 16 | 30105652 | 5 | 1.589548 |
| rs1132812      | CORO1A    | 16 | 30105652 | 3 | 0.089485 |
| rs8051096      | LOC647068 | 16 | 30255232 | 8 | 1.113243 |
| rs8051096      | LOC647068 | 16 | 30255232 | 7 | 0.905626 |
| rs8051096      | LOC647068 | 16 | 30255232 | 6 | 1.008508 |
| rs8051096      | LOC647068 | 16 | 30255232 | 3 | 3.220717 |
| rs8051096      | LOC647068 | 16 | 30255232 | 2 | 0.307462 |
| rs8051096      | LOC647068 | 16 | 30255232 | 5 | 1.219293 |
| rs4787643      | 1-Sep     | 16 | 30301161 | 3 | 0.789928 |
| rs4787643      | 1-Sep     | 16 | 30301161 | 5 | 0.320165 |
| rs12921440     | ZNF553    | 16 | 30316266 | 1 | 0.556805 |
| rs12921440     | ZNF553    | 16 | 30316266 | 2 | 1.110462 |
| rs12921440     | ZNF553    | 16 | 30316266 | 5 | 0.328198 |
| rs12921440     | ZNF553    | 16 | 30316266 | 3 | 0.492655 |
| rs12921440     | ZNF553    | 16 | 30316266 | 8 | 5.644839 |
| rs2230434      | ITGAL     | 16 | 30425597 | 2 | 4.486777 |
| rs10871453     | ZNF768    | 16 | 30444419 | 1 | 0.660122 |

|                |           |    |          |   |          |
|----------------|-----------|----|----------|---|----------|
| rs10871453     | ZNF768    | 16 | 30444419 | 7 | 5.777703 |
| rs10871453     | ZNF768    | 16 | 30444419 | 3 | 0.857063 |
| rs9934806      | ZNF785    | 16 | 30500560 | 6 | 0.620562 |
| rs8046001      | LOC647086 | 16 | 30740822 | 1 | 0.728215 |
| rs8046001      | LOC647086 | 16 | 30740822 | 3 | 1.610055 |
| rs8046001      | LOC647086 | 16 | 30740822 | 7 | 1.343495 |
| rs11642733     | SETD1A    | 16 | 30876562 | 8 | 3.485462 |
| rs11642733     | SETD1A    | 16 | 30876562 | 6 | 0.916224 |
| rs11642733     | SETD1A    | 16 | 30876562 | 1 | 5.531435 |
| rs11642733     | SETD1A    | 16 | 30876562 | 5 | 0.323184 |
| SNP16-30906699 | HSD3B7    | 16 | 30906699 | 1 | 5.746521 |
| SNP16-30906699 | HSD3B7    | 16 | 30906699 | 5 | 3.989056 |
| SNP16-30906699 | HSD3B7    | 16 | 30906699 | 6 | 7.262484 |
| SNP16-30906699 | HSD3B7    | 16 | 30906699 | 8 | 0.229939 |
| rs2305880      | HSD3B7    | 16 | 30906963 | 3 | 0.2415   |
| rs2305880      | HSD3B7    | 16 | 30906963 | 5 | 0.140493 |
| rs2305880      | HSD3B7    | 16 | 30906963 | 7 | 0.298423 |
| rs2305880      | HSD3B7    | 16 | 30906963 | 1 | 4.421078 |
| rs2305880      | HSD3B7    | 16 | 30906963 | 6 | 0.034238 |
| rs2303223      | ZNF668    | 16 | 30982676 | 2 | 1.580901 |
| rs2303223      | ZNF668    | 16 | 30982676 | 1 | 0.7602   |
| rs2303223      | ZNF668    | 16 | 30982676 | 3 | 0.527542 |
| rs2303223      | ZNF668    | 16 | 30982676 | 7 | 5.524139 |
| rs749671       | ZNF646    | 16 | 30995848 | 7 | 0.516413 |
| rs749671       | ZNF646    | 16 | 30995848 | 1 | 0.012156 |
| rs3751855      | ZNF646    | 16 | 30998710 | 6 | 0.018884 |
| rs3751855      | ZNF646    | 16 | 30998710 | 3 | 0.378722 |
| rs3751855      | ZNF646    | 16 | 30998710 | 1 | 3.981559 |
| rs3751855      | ZNF646    | 16 | 30998710 | 7 | 0.393175 |
| rs3751855      | ZNF646    | 16 | 30998710 | 5 | 4.717323 |
| rs7199949      | POL3S     | 16 | 31003665 | 3 | 0.030806 |
| rs7199949      | POL3S     | 16 | 31003665 | 7 | 0.560529 |
| rs7199949      | POL3S     | 16 | 31003665 | 1 | 3.157783 |
| rs7199949      | POL3S     | 16 | 31003665 | 5 | 0.392496 |
| rs7199949      | POL3S     | 16 | 31003665 | 6 | 0.068526 |
| SNP16-31049772 | MYST1     | 16 | 31049772 | 1 | 0.522715 |
| SNP16-31049772 | MYST1     | 16 | 31049772 | 2 | 5.759734 |
| rs1549299      | PRSS36    | 16 | 31061647 | 3 | 0.581689 |
| SNP16-31101443 | FUS       | 16 | 31101443 | 8 | 4.868756 |
| rs11861251     | ITGAM     | 16 | 31196897 | 7 | 0.271611 |
| SNP16-31244220 | ITGAM     | 16 | 31244220 | 5 | 0.253238 |
| rs1143683      | ITGAM     | 16 | 31244389 | 7 | 1.332435 |
| rs1143678      | ITGAM     | 16 | 31250506 | 7 | 0.470416 |
| rs1143678      | ITGAM     | 16 | 31250506 | 5 | 0.412691 |
| SNP16-31250736 | ITGAM     | 16 | 31250736 | 8 | 0.984753 |
| SNP16-31250736 | ITGAM     | 16 | 31250736 | 7 | 1.046386 |
| SNP16-31250736 | ITGAM     | 16 | 31250736 | 6 | 0.93132  |

|                |           |    |          |   |          |
|----------------|-----------|----|----------|---|----------|
| SNP16-31250736 | ITGAM     | 16 | 31250736 | 4 | 0.483602 |
| SNP16-31250744 | ITGAM     | 16 | 31250744 | 8 | 1.046875 |
| SNP16-31250887 | ITGAM     | 16 | 31250887 | 2 | 3.997274 |
| SNP16-31250887 | ITGAM     | 16 | 31250887 | 7 | 3.519027 |
| SNP16-31250887 | ITGAM     | 16 | 31250887 | 5 | 2.046334 |
| rs4597342      | ITGAM     | 16 | 31251270 | 6 | 0.384837 |
| rs11574633     | ITGAX     | 16 | 31274819 | 7 | 1.81172  |
| rs11574633     | ITGAX     | 16 | 31274819 | 4 | 1.376574 |
| rs11574633     | ITGAX     | 16 | 31274819 | 6 | 1.823848 |
| rs2929         | ITGAX     | 16 | 31300809 | 1 | 0.344004 |
| rs1140195      | ITGAX     | 16 | 31301680 | 6 | 0.940718 |
| rs12444660     | ITGAD     | 16 | 31329930 | 2 | 0.03727  |
| rs3813002      | ARMC5     | 16 | 31378041 | 4 | 0.231174 |
| rs3813002      | ARMC5     | 16 | 31378041 | 2 | 1.373085 |
| rs3813002      | ARMC5     | 16 | 31378041 | 6 | 3.233868 |
| rs3813002      | ARMC5     | 16 | 31378041 | 8 | 3.105216 |
| rs3813002      | ARMC5     | 16 | 31378041 | 1 | 0.126251 |
| rs11150624     | ARMC5     | 16 | 31383959 | 5 | 0.443426 |
| rs11150624     | ARMC5     | 16 | 31383959 | 3 | 0.831514 |
| rs10596        | TGFB111   | 16 | 31396417 | 3 | 0.474267 |
| rs10596        | TGFB111   | 16 | 31396417 | 5 | 0.951507 |
| rs10596        | TGFB111   | 16 | 31396417 | 4 | 0.684669 |
| rs11862739     | ZNF720    | 16 | 31678525 | 8 | 4.616069 |
| rs11862739     | ZNF720    | 16 | 31678525 | 6 | 0.408733 |
| rs33994299     | ORC6L     | 16 | 45281099 | 3 | 0.02036  |
| SNP16-46680083 | ABCC12    | 16 | 46680083 | 5 | 1.196284 |
| SNP16-46761579 | ABCC11    | 16 | 46761579 | 8 | 0.487583 |
| rs12443685     | ABCC11    | 16 | 46783980 | 4 | 0.607309 |
| rs17822471     | ABCC11    | 16 | 46799880 | 5 | 0.086497 |
| rs8047091      | ABCC11    | 16 | 46806419 | 2 | 3.451585 |
| rs8047091      | ABCC11    | 16 | 46806419 | 8 | 1.045105 |
| rs8047091      | ABCC11    | 16 | 46806419 | 5 | 0.65636  |
| rs17822931     | ABCC11    | 16 | 46815699 | 1 | 4.097671 |
| rs17822931     | ABCC11    | 16 | 46815699 | 7 | 1.587307 |
| rs17822931     | ABCC11    | 16 | 46815699 | 3 | 1.204814 |
| rs16945988     | ABCC11    | 16 | 46823278 | 2 | 1.319287 |
| rs2062553      | LOC643114 | 16 | 47088672 | 6 | 8.047429 |
| rs2062553      | LOC643114 | 16 | 47088672 | 8 | 5.218537 |
| rs2062553      | LOC643114 | 16 | 47088672 | 2 | 5.464539 |
| rs2062553      | LOC643114 | 16 | 47088672 | 1 | 4.811702 |
| rs1039341      | N4BP1     | 16 | 47132370 | 8 | 6.558361 |
| rs7197732      | N4BP1     | 16 | 47133379 | 2 | 2.7725   |
| rs7197732      | N4BP1     | 16 | 47133379 | 6 | 4.202934 |
| rs7197732      | N4BP1     | 16 | 47133379 | 8 | 5.975886 |
| rs3743776      | CBLN1     | 16 | 47870626 | 1 | 2.9311   |
| SNP16-48228678 | ZNF423    | 16 | 48228678 | 1 | 0.263092 |
| SNP16-48228678 | ZNF423    | 16 | 48228678 | 7 | 0.092074 |

|                |           |    |          |   |          |
|----------------|-----------|----|----------|---|----------|
| rs12913        | NKD1      | 16 | 49225927 | 5 | 0.565154 |
| rs12913        | NKD1      | 16 | 49225927 | 1 | 1.934571 |
| rs12913        | NKD1      | 16 | 49225927 | 2 | 1.67756  |
| rs5743266      | NOD2      | 16 | 49288597 | 7 | 0.03526  |
| rs2066843      | NOD2      | 16 | 49302700 | 6 | 0.208691 |
| rs2066843      | NOD2      | 16 | 49302700 | 5 | 0.516436 |
| rs2066843      | NOD2      | 16 | 49302700 | 8 | 0.42768  |
| rs2066843      | NOD2      | 16 | 49302700 | 7 | 0.398529 |
| rs2066845      | NOD2      | 16 | 49314041 | 6 | 2.634817 |
| rs11645288     | SALL1     | 16 | 49730178 | 7 | 0.845801 |
| rs11645288     | SALL1     | 16 | 49730178 | 3 | 0.580987 |
| rs10221156     | LOC390730 | 16 | 51526927 | 7 | 0.035937 |
| SNP16-51899304 | CHD9      | 16 | 51899304 | 1 | 2.706874 |
| SNP16-51899304 | CHD9      | 16 | 51899304 | 4 | 0.863384 |
| rs4784320      | RPGRIP1L  | 16 | 52193501 | 7 | 0.678652 |
| rs2111119      | RPGRIP1L  | 16 | 52229255 | 8 | 1.252278 |
| rs2111119      | RPGRIP1L  | 16 | 52229255 | 7 | 1.136249 |
| SNP16-52277937 | RPGRIP1L  | 16 | 52277937 | 7 | 0.109788 |
| SNP16-52875673 | IRX3      | 16 | 52875673 | 7 | 0.034311 |
| SNP16-52875673 | IRX3      | 16 | 52875673 | 4 | 7.080605 |
| rs2588994      | LOC654106 | 16 | 53915182 | 7 | 0.561159 |
| rs2008953      | IRX6      | 16 | 53921960 | 8 | 0.105853 |
| rs2008953      | IRX6      | 16 | 53921960 | 7 | 1.688702 |
| rs2008953      | IRX6      | 16 | 53921960 | 3 | 0.534483 |
| rs1132896      | MMP2      | 16 | 54077036 | 8 | 0.291333 |
| rs1053605      | MMP2      | 16 | 54077108 | 8 | 6.195953 |
| rs1053605      | MMP2      | 16 | 54077108 | 7 | 0.16519  |
| rs10775332     | MMP2      | 16 | 54094228 | 8 | 0.729561 |
| rs10775332     | MMP2      | 16 | 54094228 | 2 | 4.906795 |
| rs5569         | SLC6A2    | 16 | 54289336 | 1 | 0.23009  |
| rs5569         | SLC6A2    | 16 | 54289336 | 3 | 0.419442 |
| rs7194256      | SLC6A2    | 16 | 54295192 | 6 | 0.649099 |
| rs11864688     | CES7      | 16 | 54437824 | 1 | 0.945906 |
| rs2397965      | CES7      | 16 | 54465312 | 2 | 6.121874 |
| rs7194945      | CES7      | 16 | 54466664 | 1 | 1.955218 |
| rs1065375      | GNAO1     | 16 | 54926190 | 1 | 0.032366 |
| rs1065375      | GNAO1     | 16 | 54926190 | 2 | 0.470356 |
| rs1065375      | GNAO1     | 16 | 54926190 | 4 | 0.985891 |
| rs1065375      | GNAO1     | 16 | 54926190 | 5 | 0.489464 |
| rs1065375      | GNAO1     | 16 | 54926190 | 3 | 0.415089 |
| rs1065375      | GNAO1     | 16 | 54926190 | 8 | 0.399219 |
| rs1065375      | GNAO1     | 16 | 54926190 | 7 | 6.976961 |
| rs1799917      | GNAO1     | 16 | 54935249 | 5 | 0.205049 |
| rs1799917      | GNAO1     | 16 | 54935249 | 4 | 0.399578 |
| rs11544885     | OGFOD1    | 16 | 55057677 | 7 | 0.257249 |
| rs17841923     | BBS2      | 16 | 55111619 | 7 | 0.997455 |
| rs11643815     | MT4       | 16 | 55160299 | 3 | 3.606388 |

|                |           |    |          |   |          |
|----------------|-----------|----|----------|---|----------|
| rs11643815     | MT4       | 16 | 55160299 | 1 | 4.096873 |
| GA031500       | MT1E      | 16 | 55218452 | 1 | 4.708094 |
| rs37024        | HERPUD1   | 16 | 55523572 | 3 | 1.472771 |
| rs37024        | HERPUD1   | 16 | 55523572 | 5 | 2.081919 |
| rs37024        | HERPUD1   | 16 | 55523572 | 7 | 1.798334 |
| rs9497         | HERPUD1   | 16 | 55535075 | 2 | 0.502702 |
| rs5882         | CETP      | 16 | 55573593 | 5 | 1.228953 |
| SNP16-55616928 | NLRC5     | 16 | 55616928 | 3 | 0.479325 |
| SNP16-55617854 | NLRC5     | 16 | 55617854 | 3 | 0.715404 |
| SNP16-55617854 | NLRC5     | 16 | 55617854 | 5 | 0.239117 |
| SNP16-55617854 | NLRC5     | 16 | 55617854 | 8 | 8.735778 |
| rs13339199     | NLRC5     | 16 | 55618225 | 1 | 5.563685 |
| rs13339199     | NLRC5     | 16 | 55618225 | 5 | 4.641929 |
| rs289723       | NLRC5     | 16 | 55638029 | 7 | 0.830324 |
| rs289723       | NLRC5     | 16 | 55638029 | 2 | 0.988674 |
| rs289723       | NLRC5     | 16 | 55638029 | 3 | 1.053314 |
| rs7190199      | NLRC5     | 16 | 55658841 | 8 | 0.659417 |
| rs4784800      | CCL22     | 16 | 55957003 | 2 | 4.218938 |
| rs178602       | CIAPIN1   | 16 | 56038806 | 5 | 0.333414 |
| rs178602       | CIAPIN1   | 16 | 56038806 | 4 | 0.617469 |
| rs223869       | COQ9      | 16 | 56052493 | 5 | 0.189174 |
| GA031518       | DOK4      | 16 | 56071040 | 6 | 2.007081 |
| rs9922763      | CCDC102A  | 16 | 56103647 | 5 | 0.255569 |
| rs28446687     | CCDC102A  | 16 | 56112577 | 5 | 0.193786 |
| rs28446687     | CCDC102A  | 16 | 56112577 | 6 | 0.697038 |
| rs1801257      | GPR56     | 16 | 56246886 | 3 | 0.703409 |
| rs1801257      | GPR56     | 16 | 56246886 | 8 | 4.20757  |
| rs1801257      | GPR56     | 16 | 56246886 | 5 | 7.626573 |
| rs12444859     | GPR97     | 16 | 56279829 | 5 | 0.083644 |
| rs12444859     | GPR97     | 16 | 56279829 | 4 | 0.082124 |
| rs12444859     | GPR97     | 16 | 56279829 | 8 | 0.435555 |
| rs11648336     | GPR97     | 16 | 56280077 | 1 | 0.014873 |
| rs11648336     | GPR97     | 16 | 56280077 | 7 | 1.106151 |
| rs11648336     | GPR97     | 16 | 56280077 | 5 | 0.132218 |
| rs11648684     | CCDC135   | 16 | 56290389 | 1 | 3.057817 |
| rs11648684     | CCDC135   | 16 | 56290389 | 3 | 0.217265 |
| rs7196016      | CCDC135   | 16 | 56293401 | 3 | 0.043013 |
| rs7196016      | CCDC135   | 16 | 56293401 | 5 | 0.625065 |
| rs2923147      | CCDC135   | 16 | 56319902 | 1 | 2.404282 |
| rs1061546      | KATNB1    | 16 | 56328627 | 1 | 4.060856 |
| rs1061546      | KATNB1    | 16 | 56328627 | 7 | 5.425585 |
| rs1061546      | KATNB1    | 16 | 56328627 | 6 | 0.038771 |
| rs7200390      | LOC388282 | 16 | 56408106 | 3 | 1.473205 |
| rs10459809     | CNGB1     | 16 | 56506725 | 6 | 0.197454 |
| rs10459809     | CNGB1     | 16 | 56506725 | 3 | 0.723395 |
| rs376270       | CNGB1     | 16 | 56507558 | 5 | 1.174966 |
| rs2161703      | CNGB1     | 16 | 56511949 | 3 | 0.911688 |



|                |          |    |          |   |          |
|----------------|----------|----|----------|---|----------|
| rs12927214     | CNGB1    | 16 | 56514717 | 3 | 1.445826 |
| rs9934227      | TEPP     | 16 | 56576897 | 7 | 0.883594 |
| rs9934227      | TEPP     | 16 | 56576897 | 5 | 3.369513 |
| rs9934227      | TEPP     | 16 | 56576897 | 1 | 0.558754 |
| rs3743554      | ZNF319   | 16 | 56587693 | 1 | 3.396079 |
| rs3743554      | ZNF319   | 16 | 56587693 | 3 | 0.651384 |
| rs3743554      | ZNF319   | 16 | 56587693 | 8 | 5.562853 |
| SNP16-56601412 | C16orf57 | 16 | 56601412 | 3 | 0.765974 |
| rs3743563      | MMP15    | 16 | 56636666 | 5 | 0.103104 |
| rs3743563      | MMP15    | 16 | 56636666 | 8 | 0.236497 |
| rs3743563      | MMP15    | 16 | 56636666 | 6 | 1.490326 |
| rs3743574      | C16orf80 | 16 | 56720597 | 4 | 0.229329 |
| rs17241091     | Klkb14   | 16 | 56871449 | 1 | 5.710029 |
| rs1052276      | Klkb14   | 16 | 56872099 | 6 | 0.457631 |
| rs1052276      | Klkb14   | 16 | 56872099 | 4 | 3.245443 |
| rs1052276      | Klkb14   | 16 | 56872099 | 5 | 0.439562 |
| rs16960029     | CCDC113  | 16 | 56872626 | 6 | 1.058867 |
| rs16960029     | CCDC113  | 16 | 56872626 | 4 | 0.333319 |
| rs16960029     | CCDC113  | 16 | 56872626 | 5 | 0.525855 |
| rs16960032     | CCDC113  | 16 | 56873082 | 5 | 0.555052 |
| rs16960032     | CCDC113  | 16 | 56873082 | 4 | 0.035837 |
| rs16960035     | CCDC113  | 16 | 56873132 | 5 | 0.790844 |
| rs16960035     | CCDC113  | 16 | 56873132 | 6 | 0.777992 |
| rs16960035     | CCDC113  | 16 | 56873132 | 4 | 0.018077 |
| rs3743580      | CCDC113  | 16 | 56874016 | 5 | 0.619439 |
| rs3743580      | CCDC113  | 16 | 56874016 | 4 | 4.360149 |
| rs42945        | NDRG4    | 16 | 57102927 | 3 | 0.975783 |
| rs42945        | NDRG4    | 16 | 57102927 | 1 | 0.126951 |
| rs42945        | NDRG4    | 16 | 57102927 | 7 | 1.90675  |
| rs1058132      | NDRG4    | 16 | 57103798 | 4 | 0.275431 |
| rs1058132      | NDRG4    | 16 | 57103798 | 3 | 0.712609 |
| rs1058132      | NDRG4    | 16 | 57103798 | 1 | 5.91298  |
| rs1058132      | NDRG4    | 16 | 57103798 | 7 | 5.136789 |
| rs4784964      | FLJ10815 | 16 | 57258304 | 6 | 0.820368 |
| rs7191331      | FLJ10815 | 16 | 57271299 | 1 | 6.114413 |
| rs7191331      | FLJ10815 | 16 | 57271299 | 4 | 0.296488 |
| rs6993         | GOT2     | 16 | 57298868 | 6 | 0.315676 |
| rs6993         | GOT2     | 16 | 57298868 | 3 | 0.248983 |
| rs6993         | GOT2     | 16 | 57298868 | 2 | 9.750479 |
| rs30842        | GOT2     | 16 | 57300955 | 6 | 0.205986 |
| rs30842        | GOT2     | 16 | 57300955 | 3 | 0.742116 |
| SNP16-57325630 | GOT2     | 16 | 57325630 | 4 | 1.828637 |
| rs35213        | CDH11    | 16 | 63573588 | 8 | 1.105957 |
| rs35213        | CDH11    | 16 | 63573588 | 6 | 0.178911 |
| rs35213        | CDH11    | 16 | 63573588 | 2 | 0.845387 |
| rs35213        | CDH11    | 16 | 63573588 | 3 | 1.855588 |
| rs35195        | CDH11    | 16 | 63583219 | 7 | 0.392582 |

|                |           |    |          |   |          |
|----------------|-----------|----|----------|---|----------|
| rs12444408     | LOC283867 | 16 | 64167662 | 5 | 0.845837 |
| rs12444408     | LOC283867 | 16 | 64167662 | 3 | 1.22483  |
| rs355944       | CMTM4     | 16 | 65209746 | 6 | 4.811281 |
| rs363162       | CCDC79    | 16 | 65370298 | 1 | 3.410344 |
| rs152164       | NAE1      | 16 | 65419467 | 1 | 1.309278 |
| rs152164       | NAE1      | 16 | 65419467 | 2 | 1.95146  |
| SNP16-65594555 | FLJ37464  | 16 | 65594555 | 7 | 0.192024 |
| rs2233455      | NOL3      | 16 | 65765434 | 7 | 0.727666 |
| rs12923138     | ELMO3     | 16 | 65790767 | 2 | 0.965549 |
| rs12923138     | ELMO3     | 16 | 65790767 | 8 | 0.280488 |
| rs12923138     | ELMO3     | 16 | 65790767 | 1 | 0.422552 |
| rs12051247     | LRRC29    | 16 | 65798783 | 7 | 1.064648 |
| SNP16-65799431 | LRRC29    | 16 | 65799431 | 7 | 1.098532 |
| rs7186310      | SLC9A5    | 16 | 65863014 | 7 | 1.32634  |
| rs8050745      | PLEKHG4   | 16 | 65869268 | 2 | 1.593434 |
| rs11860295     | PLEKHG4   | 16 | 65873735 | 2 | 4.665608 |
| rs9922085      | LRRC36    | 16 | 65955081 | 2 | 1.358568 |
| rs16957415     | LRRC36    | 16 | 65976458 | 2 | 2.14812  |
| rs1053612      | TPPP3     | 16 | 65981440 | 2 | 3.520708 |
| rs11552319     | TPPP3     | 16 | 65981623 | 2 | 3.526176 |
| rs5479         | HSD11B2   | 16 | 66027234 | 2 | 6.128364 |
| GA013416       | HSD11B2   | 16 | 66028604 | 7 | 6.583283 |
| rs4360931      | ATP6V0D1  | 16 | 66029427 | 7 | 0.225414 |
| rs4474673      | RANBP10   | 16 | 66316279 | 8 | 8.090074 |
| SNP16-66477550 | NRN1L     | 16 | 66477550 | 8 | 1.491396 |
| SNP16-66477550 | NRN1L     | 16 | 66477550 | 7 | 1.825997 |
| SNP16-66477550 | NRN1L     | 16 | 66477550 | 6 | 4.05019  |
| rs1134760      | CTRL      | 16 | 66521704 | 1 | 0.231705 |
| rs1134760      | CTRL      | 16 | 66521704 | 7 | 0.346223 |
| rs1134760      | CTRL      | 16 | 66521704 | 8 | 3.71067  |
| rs1134760      | CTRL      | 16 | 66521704 | 6 | 4.242541 |
| rs1134760      | CTRL      | 16 | 66521704 | 2 | 0.263048 |
| rs4986970      | LCAT      | 16 | 66533821 | 8 | 7.023939 |
| rs11860125     | SLC12A4   | 16 | 66538470 | 1 | 0.029143 |
| rs11860125     | SLC12A4   | 16 | 66538470 | 2 | 3.295974 |
| rs11542821     | SLC12A4   | 16 | 66542090 | 1 | 0.550044 |
| rs11542821     | SLC12A4   | 16 | 66542090 | 2 | 0.710807 |
| rs1133090      | DPEP2     | 16 | 66578969 | 1 | 0.463325 |
| rs13816        | DDX28     | 16 | 66612996 | 6 | 0.15718  |
| rs13816        | DDX28     | 16 | 66612996 | 7 | 4.654556 |
| rs13816        | DDX28     | 16 | 66612996 | 4 | 2.252098 |
| rs237831       | DDX28     | 16 | 66614597 | 3 | 0.105794 |
| rs12598        | NFATC3    | 16 | 66783016 | 2 | 2.620507 |
| rs3743739      | LYPLA3    | 16 | 66850821 | 1 | 0.895461 |
| rs3743739      | LYPLA3    | 16 | 66850821 | 2 | 6.121294 |
| rs3743739      | LYPLA3    | 16 | 66850821 | 8 | 6.012573 |
| rs3743739      | LYPLA3    | 16 | 66850821 | 4 | 4.669218 |

|                |        |    |          |   |          |
|----------------|--------|----|----------|---|----------|
| rs12599876     | SMPD3  | 16 | 66950906 | 6 | 2.124724 |
| rs12599876     | SMPD3  | 16 | 66950906 | 7 | 0.626343 |
| rs1532211      | SMPD3  | 16 | 66951808 | 1 | 4.09891  |
| rs1532211      | SMPD3  | 16 | 66951808 | 5 | 0.855815 |
| rs1532211      | SMPD3  | 16 | 66951808 | 7 | 0.748905 |
| rs1532211      | SMPD3  | 16 | 66951808 | 4 | 1.340731 |
| rs2279539      | SMPD3  | 16 | 66952595 | 7 | 0.122953 |
| rs2279539      | SMPD3  | 16 | 66952595 | 1 | 1.299526 |
| rs1170444      | ZFP90  | 16 | 67130788 | 1 | 3.929147 |
| rs1170444      | ZFP90  | 16 | 67130788 | 5 | 0.966172 |
| rs1170443      | ZFP90  | 16 | 67130796 | 5 | 4.037733 |
| rs1170443      | ZFP90  | 16 | 67130796 | 1 | 4.001575 |
| rs1126933      | CDH3   | 16 | 67279034 | 4 | 5.716966 |
| rs1126933      | CDH3   | 16 | 67279034 | 3 | 0.485111 |
| rs2232227      | HAS3   | 16 | 67700982 | 7 | 0.717293 |
| rs2232227      | HAS3   | 16 | 67700982 | 1 | 3.275169 |
| rs2232228      | HAS3   | 16 | 67701078 | 2 | 1.157223 |
| rs2232228      | HAS3   | 16 | 67701078 | 3 | 0.836195 |
| rs2232228      | HAS3   | 16 | 67701078 | 6 | 3.272864 |
| rs2232228      | HAS3   | 16 | 67701078 | 5 | 1.338175 |
| rs2232228      | HAS3   | 16 | 67701078 | 4 | 0.275537 |
| rs2232228      | HAS3   | 16 | 67701078 | 1 | 1.261685 |
| SNP16-67758551 | CIRH1A | 16 | 67758551 | 1 | 3.378669 |
| SNP16-67861549 | SNTB2  | 16 | 67861549 | 3 | 1.126688 |
| rs1127231      | VPS4A  | 16 | 67912464 | 7 | 0.832314 |
| rs1127231      | VPS4A  | 16 | 67912464 | 2 | 3.340837 |
| rs1127231      | VPS4A  | 16 | 67912464 | 5 | 1.196591 |
| rs1127231      | VPS4A  | 16 | 67912464 | 3 | 1.13198  |
| rs1127231      | VPS4A  | 16 | 67912464 | 8 | 0.953888 |
| rs1127231      | VPS4A  | 16 | 67912464 | 1 | 1.353123 |
| GA031593       | VPS4A  | 16 | 67912656 | 3 | 0.431272 |
| rs1055401      | PDF    | 16 | 67920278 | 7 | 6.693046 |
| rs1055401      | PDF    | 16 | 67920278 | 1 | 5.092177 |
| rs11542583     | COG8   | 16 | 67930915 | 8 | 3.812378 |
| rs11542583     | COG8   | 16 | 67930915 | 2 | 2.046446 |
| rs11542583     | COG8   | 16 | 67930915 | 1 | 0.785358 |
| rs11542583     | COG8   | 16 | 67930915 | 3 | 6.428479 |
| rs11542583     | COG8   | 16 | 67930915 | 5 | 1.128996 |
| rs11641233     | NFAT5  | 16 | 68292064 | 1 | 0.997365 |
| rs11641233     | NFAT5  | 16 | 68292064 | 7 | 0.362702 |
| rs11641233     | NFAT5  | 16 | 68292064 | 2 | 0.622799 |
| rs11641233     | NFAT5  | 16 | 68292064 | 4 | 0.223421 |
| rs11641233     | NFAT5  | 16 | 68292064 | 8 | 0.676692 |
| rs2965757      | NFAT5  | 16 | 68295347 | 8 | 1.871289 |
| rs2965757      | NFAT5  | 16 | 68295347 | 6 | 5.441938 |
| rs689453       | NQO1   | 16 | 68309874 | 3 | 0.148045 |
| rs1075935      | NOB1   | 16 | 68333878 | 4 | 0.862679 |

|                |          |    |          |   |          |
|----------------|----------|----|----------|---|----------|
| rs1075935      | NOB1     | 16 | 68333878 | 1 | 0.808407 |
| rs1075935      | NOB1     | 16 | 68333878 | 2 | 5.330387 |
| rs1075935      | NOB1     | 16 | 68333878 | 7 | 0.94875  |
| rs1875245      | WWP2     | 16 | 68520904 | 6 | 5.910637 |
| rs1875245      | WWP2     | 16 | 68520904 | 4 | 0.028433 |
| rs2270841      | WWP2     | 16 | 68525398 | 1 | 6.059133 |
| rs2270841      | WWP2     | 16 | 68525398 | 5 | 0.440244 |
| rs2270841      | WWP2     | 16 | 68525398 | 8 | 0.436793 |
| rs2270841      | WWP2     | 16 | 68525398 | 6 | 0.16218  |
| rs1983016      | WWP2     | 16 | 68527830 | 6 | 3.784473 |
| rs1983016      | WWP2     | 16 | 68527830 | 5 | 0.618293 |
| rs1983016      | WWP2     | 16 | 68527830 | 8 | 5.686357 |
| rs1983016      | WWP2     | 16 | 68527830 | 1 | 5.136553 |
| rs2270844      | WWP2     | 16 | 68530798 | 3 | 0.010867 |
| rs3192882      | WWP2     | 16 | 68533132 | 5 | 0.081296 |
| rs3192882      | WWP2     | 16 | 68533132 | 2 | 4.755489 |
| rs3192882      | WWP2     | 16 | 68533132 | 3 | 0.519104 |
| rs9926963      | PDPR     | 16 | 68752144 | 6 | 0.510351 |
| rs9926963      | PDPR     | 16 | 68752144 | 4 | 0.362618 |
| rs11537663     | AARS     | 16 | 68844051 | 1 | 0.942122 |
| rs11537663     | AARS     | 16 | 68844051 | 2 | 0.699513 |
| rs11537663     | AARS     | 16 | 68844051 | 7 | 0.537998 |
| rs11537663     | AARS     | 16 | 68844051 | 4 | 5.628827 |
| rs1134074      | DDX19A   | 16 | 68952888 | 3 | 0.241874 |
| rs1134074      | DDX19A   | 16 | 68952888 | 7 | 3.976625 |
| rs1134074      | DDX19A   | 16 | 68952888 | 5 | 0.212026 |
| rs7192865      | FUK      | 16 | 69064408 | 4 | 0.647791 |
| rs7192865      | FUK      | 16 | 69064408 | 7 | 0.556191 |
| rs7192865      | FUK      | 16 | 69064408 | 3 | 0.413472 |
| rs7192865      | FUK      | 16 | 69064408 | 6 | 0.36511  |
| rs7192865      | FUK      | 16 | 69064408 | 2 | 1.324516 |
| rs17884050     | FUK      | 16 | 69067102 | 6 | 0.742277 |
| rs33910368     | SF3B3    | 16 | 69126716 | 6 | 5.097774 |
| rs33910368     | SF3B3    | 16 | 69126716 | 4 | 6.255003 |
| rs33910368     | SF3B3    | 16 | 69126716 | 3 | 0.095481 |
| rs33910368     | SF3B3    | 16 | 69126716 | 7 | 0.493954 |
| rs33910368     | SF3B3    | 16 | 69126716 | 1 | 0.157573 |
| rs33910368     | SF3B3    | 16 | 69126716 | 2 | 1.090189 |
| rs3813904      | C16orf77 | 16 | 69238245 | 4 | 1.123154 |
| rs8046424      | C16orf77 | 16 | 69248490 | 4 | 1.531166 |
| rs4985556      | C16orf77 | 16 | 69251501 | 4 | 3.521911 |
| rs4985556      | C16orf77 | 16 | 69251501 | 6 | 1.140325 |
| rs1022217      | HYDIN    | 16 | 69618793 | 8 | 2.52129  |
| rs1022217      | HYDIN    | 16 | 69618793 | 7 | 0.566509 |
| SNP16-69778256 | HYDIN    | 16 | 69778256 | 8 | 1.456547 |
| rs17851296     | CALB2    | 16 | 69969137 | 5 | 0.106606 |
| rs17851296     | CALB2    | 16 | 69969137 | 4 | 0.023799 |

|               |           |    |          |   |          |
|---------------|-----------|----|----------|---|----------|
| rs17851296    | CALB2     | 16 | 69969137 | 6 | 0.04184  |
| rs17851296    | CALB2     | 16 | 69969137 | 3 | 0.104382 |
| rs17851296    | CALB2     | 16 | 69969137 | 7 | 0.690089 |
| rs17851296    | CALB2     | 16 | 69969137 | 1 | 1.403784 |
| rs4620964     | LOC390738 | 16 | 70023589 | 1 | 1.309336 |
| rs4620964     | LOC390738 | 16 | 70023589 | 5 | 0.300068 |
| rs4620964     | LOC390738 | 16 | 70023589 | 6 | 0.44012  |
| rs4620964     | LOC390738 | 16 | 70023589 | 3 | 0.082268 |
| rs1609868     | LOC729556 | 16 | 70047794 | 4 | 0.700671 |
| rs1609868     | LOC729556 | 16 | 70047794 | 5 | 0.068799 |
| rs1609868     | LOC729556 | 16 | 70047794 | 3 | 0.424566 |
| rs2303788     | LOC729556 | 16 | 70055419 | 4 | 0.308231 |
| rs2303788     | LOC729556 | 16 | 70055419 | 5 | 0.28534  |
| rs2303788     | LOC729556 | 16 | 70055419 | 3 | 1.79162  |
| rs2303788     | LOC729556 | 16 | 70055419 | 2 | 3.862309 |
| rs2288489     | ZNF19     | 16 | 70067186 | 5 | 0.00116  |
| rs2288489     | ZNF19     | 16 | 70067186 | 8 | 0.129373 |
| rs10500557    | ZNF19     | 16 | 70067280 | 8 | 8.715527 |
| rs8050871     | ZNF19     | 16 | 70067297 | 5 | 0.196365 |
| rs8050871     | ZNF19     | 16 | 70067297 | 2 | 1.443716 |
| rs7184486     | NULL      | 16 | 70444031 | 1 | 4.923528 |
| rs7184486     | NULL      | 16 | 70444031 | 4 | 0.995212 |
| rs2291947     | NULL      | 16 | 70447990 | 7 | 2.170921 |
| rs2291947     | NULL      | 16 | 70447990 | 8 | 0.501419 |
| rs2291947     | NULL      | 16 | 70447990 | 5 | 0.068651 |
| rs2291947     | NULL      | 16 | 70447990 | 3 | 0.167217 |
| rs3088285     | NULL      | 16 | 70448051 | 8 | 6.04109  |
| rs3088285     | NULL      | 16 | 70448051 | 1 | 4.097905 |
| rs6558        | KIAA0174  | 16 | 70520092 | 4 | 1.472433 |
| rs7195988     | PKD1L3    | 16 | 70520687 | 4 | 5.80513  |
| rs7195988     | PKD1L3    | 16 | 70520687 | 8 | 4.285952 |
| rs7195988     | PKD1L3    | 16 | 70520687 | 1 | 4.544195 |
| rs17358402    | PKD1L3    | 16 | 70525428 | 4 | 0.406689 |
| rs17358402    | PKD1L3    | 16 | 70525428 | 1 | 4.117237 |
| rs17358402    | PKD1L3    | 16 | 70525428 | 8 | 2.987173 |
| rs1035543     | PKD1L3    | 16 | 70541273 | 3 | 1.648769 |
| rs9921412     | PKD1L3    | 16 | 70545607 | 1 | 2.543134 |
| rs9921412     | PKD1L3    | 16 | 70545607 | 4 | 0.878779 |
| rs1559400     | PKD1L3    | 16 | 70568694 | 3 | 0.279368 |
| rs4788591     | PKD1L3    | 16 | 70577824 | 3 | 0.643399 |
| rs3213422     | DHODH     | 16 | 70600183 | 5 | 0.217138 |
| rs3213422     | DHODH     | 16 | 70600183 | 7 | 0.214473 |
| rs3213422     | DHODH     | 16 | 70600183 | 1 | 3.70367  |
| SNP16-7061492 | DHODH     | 16 | 70614922 | 5 | 0.529895 |
| rs5475        | HP        | 16 | 70651849 | 6 | 1.19363  |
| rs5475        | HP        | 16 | 70651849 | 7 | 2.117028 |
| rs5475        | HP        | 16 | 70651849 | 4 | 2.31844  |

|                |           |    |          |   |          |
|----------------|-----------|----|----------|---|----------|
| rs11642506     | HPR       | 16 | 70665366 | 4 | 0.46173  |
| rs1050362      | DHX38     | 16 | 70688316 | 5 | 6.908885 |
| rs4788459      | PMFBP1    | 16 | 70710626 | 1 | 4.877574 |
| rs16973716     | PMFBP1    | 16 | 70714343 | 4 | 0.452361 |
| rs16973716     | PMFBP1    | 16 | 70714343 | 1 | 4.176984 |
| rs16973716     | PMFBP1    | 16 | 70714343 | 7 | 0.902913 |
| rs34832584     | PMFBP1    | 16 | 70720467 | 1 | 4.382964 |
| rs34832584     | PMFBP1    | 16 | 70720467 | 7 | 0.855998 |
| rs34832584     | PMFBP1    | 16 | 70720467 | 4 | 1.193359 |
| SNP16-70742067 | PMFBP1    | 16 | 70742067 | 1 | 3.082284 |
| SNP16-70742067 | PMFBP1    | 16 | 70742067 | 4 | 0.587592 |
| rs217180       | PMFBP1    | 16 | 70742130 | 4 | 1.207022 |
| rs217180       | PMFBP1    | 16 | 70742130 | 6 | 0.675506 |
| rs699444       | ZFH3      | 16 | 71385259 | 1 | 3.120054 |
| rs699444       | ZFH3      | 16 | 71385259 | 8 | 7.05317  |
| rs699444       | ZFH3      | 16 | 71385259 | 3 | 1.746215 |
| SNP16-71551361 | ZFH3      | 16 | 71551361 | 4 | 0.001025 |
| SNP16-71551361 | ZFH3      | 16 | 71551361 | 5 | 4.543794 |
| rs8058133      | RFWD3     | 16 | 73214986 | 2 | 0.196952 |
| rs8058133      | RFWD3     | 16 | 73214986 | 6 | 3.870047 |
| rs8058133      | RFWD3     | 16 | 73214986 | 4 | 3.078756 |
| rs8058133      | RFWD3     | 16 | 73214986 | 7 | 0.121684 |
| rs8058133      | RFWD3     | 16 | 73214986 | 1 | 0.043719 |
| SNP16-73229367 | RFWD3     | 16 | 73229367 | 1 | 0.53967  |
| SNP16-73229367 | RFWD3     | 16 | 73229367 | 2 | 0.220705 |
| rs4887783      | RFWD3     | 16 | 73258244 | 4 | 1.466491 |
| rs4887783      | RFWD3     | 16 | 73258244 | 2 | 0.809854 |
| rs4887783      | RFWD3     | 16 | 73258244 | 6 | 0.179668 |
| rs4887783      | RFWD3     | 16 | 73258244 | 7 | 0.012935 |
| rs4887783      | RFWD3     | 16 | 73258244 | 1 | 0.5301   |
| rs4395097      | LOC645726 | 16 | 73259931 | 3 | 0.667453 |
| rs4395097      | LOC645726 | 16 | 73259931 | 4 | 1.037527 |
| rs4395097      | LOC645726 | 16 | 73259931 | 7 | 0.31975  |
| rs929881       | FA2H      | 16 | 73365926 | 1 | 1.78894  |
| rs929881       | FA2H      | 16 | 73365926 | 5 | 5.774853 |
| rs929881       | FA2H      | 16 | 73365926 | 6 | 5.115095 |
| rs929881       | FA2H      | 16 | 73365926 | 2 | 2.214765 |
| rs14308        | WDR59     | 16 | 73477692 | 5 | 0.694698 |
| rs14308        | WDR59     | 16 | 73477692 | 3 | 1.744278 |
| rs12448858     | WDR59     | 16 | 73576375 | 4 | 4.325581 |
| rs12448858     | WDR59     | 16 | 73576375 | 5 | 6.127176 |
| rs11647917     | ZNRF1     | 16 | 73700743 | 3 | 1.554661 |
| rs1043503      | ZNRF1     | 16 | 73701798 | 2 | 1.283103 |
| rs1043503      | ZNRF1     | 16 | 73701798 | 4 | 0.297447 |
| rs1043509      | ZNRF1     | 16 | 73701909 | 3 | 0.383584 |
| rs4737         | CTRB2     | 16 | 73795604 | 1 | 1.015496 |
| rs11640206     | BCAR1     | 16 | 73820430 | 5 | 0.380374 |

|                |           |    |          |   |          |
|----------------|-----------|----|----------|---|----------|
| rs3743613      | BCAR1     | 16 | 73827035 | 5 | 5.077504 |
| rs3743613      | BCAR1     | 16 | 73827035 | 4 | 2.304072 |
| rs4888432      | CHST6     | 16 | 74068474 | 7 | 1.187899 |
| rs4888432      | CHST6     | 16 | 74068474 | 6 | 0.453797 |
| rs4888432      | CHST6     | 16 | 74068474 | 3 | 0.627178 |
| rs8048818      | CHST5     | 16 | 74121247 | 2 | 3.099811 |
| rs8048818      | CHST5     | 16 | 74121247 | 4 | 0.244179 |
| rs3784932      | CHST5     | 16 | 74121788 | 2 | 3.231773 |
| rs3784932      | CHST5     | 16 | 74121788 | 4 | 0.739372 |
| rs2641806      | CHST5     | 16 | 74122921 | 5 | 0.001767 |
| SNP16-74200302 | ADAT1     | 16 | 74200302 | 2 | 5.175818 |
| SNP16-74204186 | ADAT1     | 16 | 74204186 | 1 | 3.753204 |
| SNP16-74204186 | ADAT1     | 16 | 74204186 | 6 | 0.34958  |
| SNP16-74204186 | ADAT1     | 16 | 74204186 | 5 | 0.870141 |
| rs12599021     | CNTNAP4   | 16 | 75150134 | 5 | 2.765014 |
| rs2278045      | MON1B     | 16 | 75782364 | 7 | 0.410598 |
| rs2278045      | MON1B     | 16 | 75782364 | 5 | 0.931747 |
| rs1137647      | ADAMTS18  | 16 | 75874335 | 5 | 0.15343  |
| rs889705       | ADAMTS18  | 16 | 75874898 | 3 | 0.372446 |
| rs889705       | ADAMTS18  | 16 | 75874898 | 2 | 0.765656 |
| rs889707       | ADAMTS18  | 16 | 75875257 | 2 | 1.245325 |
| rs3743749      | ADAMTS18  | 16 | 75880736 | 2 | 0.961016 |
| rs3743749      | ADAMTS18  | 16 | 75880736 | 3 | 1.037682 |
| rs12935229     | ADAMTS18  | 16 | 75886396 | 5 | 1.42713  |
| rs9930984      | ADAMTS18  | 16 | 75911474 | 1 | 1.840081 |
| rs8059275      | ADAMTS18  | 16 | 75947457 | 3 | 0.629482 |
| rs11643211     | ADAMTS18  | 16 | 75959046 | 1 | 0.420607 |
| rs308925       | NULL      | 16 | 76327335 | 8 | 4.553426 |
| rs308925       | NULL      | 16 | 76327335 | 5 | 1.295649 |
| rs1133110      | NULL      | 16 | 76333560 | 6 | 3.82515  |
| rs1133110      | NULL      | 16 | 76333560 | 5 | 0.36787  |
| rs1133110      | NULL      | 16 | 76333560 | 4 | 2.227653 |
| rs1133110      | NULL      | 16 | 76333560 | 3 | 0.336203 |
| rs16946927     | KIAA1576  | 16 | 76570887 | 3 | 0.271913 |
| rs2072665      | CLEC3A    | 16 | 76622989 | 6 | 3.372367 |
| rs11545028     | WWOX      | 16 | 76691172 | 6 | 0.949268 |
| SNP16-76870028 | WWOX      | 16 | 76870028 | 4 | 2.452095 |
| rs7192635      | LOC645957 | 16 | 77415860 | 7 | 1.602556 |
| rs12325279     | LOC645957 | 16 | 77416906 | 4 | 0.065472 |
| rs12325279     | LOC645957 | 16 | 77416906 | 6 | 0.086952 |
| rs12930924     | LOC645957 | 16 | 77417091 | 3 | 0.327821 |
| rs12930924     | LOC645957 | 16 | 77417091 | 8 | 0.614389 |
| rs12930924     | LOC645957 | 16 | 77417091 | 4 | 0.217503 |
| SNP16-77803287 | WWOX      | 16 | 77803287 | 4 | 7.715004 |
| rs4575545      | LOC440389 | 16 | 78312947 | 8 | 4.607923 |
| rs11866734     | DYNLRB2   | 16 | 79140998 | 1 | 2.536595 |
| rs8049284      | CDYL2     | 16 | 79276380 | 8 | 0.28933  |

|                |          |    |          |   |          |
|----------------|----------|----|----------|---|----------|
| rs8049284      | CDYL2    | 16 | 79276380 | 3 | 1.032852 |
| rs8049284      | CDYL2    | 16 | 79276380 | 5 | 1.053807 |
| rs1469122      | C16orf61 | 16 | 79567574 | 1 | 0.057937 |
| rs1469122      | C16orf61 | 16 | 79567574 | 2 | 7.104007 |
| rs2287991      | CENPN    | 16 | 79598056 | 1 | 3.660485 |
| rs16954513     | ATMIN    | 16 | 79634705 | 1 | 4.834084 |
| rs1869348      | PKD1L2   | 16 | 79699758 | 4 | 3.469292 |
| rs16954698     | PKD1L2   | 16 | 79714854 | 2 | 5.78033  |
| rs16954698     | PKD1L2   | 16 | 79714854 | 4 | 0.479593 |
| SNP16-79719079 | PKD1L2   | 16 | 79719079 | 1 | 4.481004 |
| SNP16-79719079 | PKD1L2   | 16 | 79719079 | 8 | 5.239039 |
| rs4889244      | PKD1L2   | 16 | 79730694 | 3 | 1.258457 |
| rs4889244      | PKD1L2   | 16 | 79730694 | 7 | 0.570519 |
| rs4889244      | PKD1L2   | 16 | 79730694 | 4 | 1.062811 |
| rs4889244      | PKD1L2   | 16 | 79730694 | 5 | 0.724361 |
| rs4889244      | PKD1L2   | 16 | 79730694 | 6 | 1.407974 |
| rs35941327     | PKD1L2   | 16 | 79732604 | 3 | 0.518956 |
| SNP16-79738567 | PKD1L2   | 16 | 79738567 | 1 | 2.251145 |
| SNP16-79738567 | PKD1L2   | 16 | 79738567 | 3 | 1.742033 |
| SNP16-79738567 | PKD1L2   | 16 | 79738567 | 4 | 0.260049 |
| SNP16-79738567 | PKD1L2   | 16 | 79738567 | 5 | 1.733826 |
| rs9921748      | PKD1L2   | 16 | 79739284 | 5 | 2.355006 |
| rs9921748      | PKD1L2   | 16 | 79739284 | 1 | 1.466036 |
| rs9921748      | PKD1L2   | 16 | 79739284 | 4 | 0.220708 |
| rs9921748      | PKD1L2   | 16 | 79739284 | 3 | 1.394803 |
| SNP16-79745069 | PKD1L2   | 16 | 79745069 | 7 | 1.753792 |
| SNP16-79745136 | PKD1L2   | 16 | 79745136 | 7 | 1.531406 |
| SNP16-79745210 | PKD1L2   | 16 | 79745210 | 7 | 0.10101  |
| rs1453324      | PKD1L2   | 16 | 79748114 | 5 | 0.447668 |
| rs1453324      | PKD1L2   | 16 | 79748114 | 1 | 3.281961 |
| rs1453324      | PKD1L2   | 16 | 79748114 | 3 | 1.036007 |
| rs1453324      | PKD1L2   | 16 | 79748114 | 4 | 3.43956  |
| SNP16-79750822 | PKD1L2   | 16 | 79750822 | 4 | 2.172369 |
| SNP16-79750822 | PKD1L2   | 16 | 79750822 | 8 | 0.255473 |
| SNP16-79750822 | PKD1L2   | 16 | 79750822 | 1 | 3.944635 |
| SNP16-79750822 | PKD1L2   | 16 | 79750822 | 5 | 2.009832 |
| rs2317117      | PKD1L2   | 16 | 79751883 | 1 | 3.979951 |
| rs10400943     | PKD1L2   | 16 | 79755807 | 1 | 4.392961 |
| rs12931217     | PKD1L2   | 16 | 79757021 | 4 | 1.365441 |
| rs12931217     | PKD1L2   | 16 | 79757021 | 5 | 1.628017 |
| rs12925771     | PKD1L2   | 16 | 79757045 | 3 | 0.063023 |
| rs12925771     | PKD1L2   | 16 | 79757045 | 7 | 0.275843 |
| rs12925771     | PKD1L2   | 16 | 79757045 | 1 | 1.518264 |
| rs12925771     | PKD1L2   | 16 | 79757045 | 4 | 2.399263 |
| rs12925771     | PKD1L2   | 16 | 79757045 | 6 | 1.242494 |
| rs12925771     | PKD1L2   | 16 | 79757045 | 2 | 2.244486 |
| rs12926898     | PKD1L2   | 16 | 79757055 | 1 | 1.799392 |



|                |          |    |          |   |          |
|----------------|----------|----|----------|---|----------|
| rs12926898     | PKD1L2   | 16 | 79757055 | 7 | 0.057539 |
| rs12926898     | PKD1L2   | 16 | 79757055 | 2 | 2.73784  |
| rs12926898     | PKD1L2   | 16 | 79757055 | 3 | 0.8918   |
| rs12926898     | PKD1L2   | 16 | 79757055 | 4 | 1.852611 |
| rs12596941     | PKD1L2   | 16 | 79766016 | 3 | 0.498417 |
| rs1869349      | PKD1L2   | 16 | 79766748 | 4 | 2.055337 |
| rs9935113      | PKD1L2   | 16 | 79768997 | 3 | 0.404629 |
| rs9935113      | PKD1L2   | 16 | 79768997 | 7 | 2.42756  |
| rs9935113      | PKD1L2   | 16 | 79768997 | 4 | 0.887339 |
| rs6564838      | PKD1L2   | 16 | 79799695 | 3 | 3.161331 |
| rs6564838      | PKD1L2   | 16 | 79799695 | 7 | 2.63878  |
| SNP16-79811260 | PKD1L2   | 16 | 79811260 | 1 | 0.553897 |
| rs7501331      | BCMO1    | 16 | 79871997 | 3 | 0.353983 |
| rs7501331      | BCMO1    | 16 | 79871997 | 6 | 1.955347 |
| rs7501331      | BCMO1    | 16 | 79871997 | 5 | 1.45263  |
| rs7501331      | BCMO1    | 16 | 79871997 | 2 | 0.23308  |
| rs7501331      | BCMO1    | 16 | 79871997 | 1 | 1.005406 |
| rs1816122      | GAN      | 16 | 79969174 | 2 | 4.971545 |
| rs1816122      | GAN      | 16 | 79969174 | 7 | 0.200284 |
| rs1816122      | GAN      | 16 | 79969174 | 4 | 0.641083 |
| rs4586425      | PLCG2    | 16 | 80377269 | 6 | 1.086021 |
| rs4586425      | PLCG2    | 16 | 80377269 | 7 | 1.275729 |
| rs13333716     | PLCG2    | 16 | 80487028 | 2 | 6.782697 |
| rs4445895      | HSD17B2  | 16 | 80626398 | 1 | 2.838981 |
| rs4445895      | HSD17B2  | 16 | 80626398 | 4 | 2.214256 |
| rs4445895      | HSD17B2  | 16 | 80626398 | 3 | 1.764665 |
| rs1056690      | MPHOSPH6 | 16 | 80739299 | 1 | 0.170337 |
| rs1056690      | MPHOSPH6 | 16 | 80739299 | 2 | 1.749263 |
| rs1056690      | MPHOSPH6 | 16 | 80739299 | 5 | 0.130285 |
| SNP16-80761259 | MPHOSPH6 | 16 | 80761259 | 7 | 0.848008 |
| rs1048612      | CDH13    | 16 | 82374520 | 3 | 0.506121 |
| rs1048612      | CDH13    | 16 | 82374520 | 1 | 3.705837 |
| rs3743621      | CDH13    | 16 | 82386630 | 2 | 5.151246 |
| rs3743621      | CDH13    | 16 | 82386630 | 3 | 0.57286  |
| rs925331       | NECAB2   | 16 | 82569605 | 5 | 0.244229 |
| rs8044745      | NECAB2   | 16 | 82593795 | 8 | 4.416577 |
| rs8044745      | NECAB2   | 16 | 82593795 | 7 | 0.473727 |
| rs3881         | NECAB2   | 16 | 82593826 | 4 | 0.740955 |
| rs8045237      | NECAB2   | 16 | 82593858 | 7 | 1.01269  |
| rs1058444      | HSDL1    | 16 | 82713781 | 5 | 0.021078 |
| rs1058444      | HSDL1    | 16 | 82713781 | 3 | 0.135907 |
| rs1058444      | HSDL1    | 16 | 82713781 | 2 | 5.603638 |
| rs3199061      | HSDL1    | 16 | 82714502 | 5 | 0.615322 |
| rs3199061      | HSDL1    | 16 | 82714502 | 2 | 5.758617 |
| rs3199061      | HSDL1    | 16 | 82714502 | 4 | 1.123969 |
| rs3199061      | HSDL1    | 16 | 82714502 | 3 | 0.068786 |
| rs11644164     | LRRRC50  | 16 | 82761440 | 7 | 1.354909 |

|                |           |    |          |   |          |
|----------------|-----------|----|----------|---|----------|
| rs11644164     | LRR50     | 16 | 82761440 | 1 | 0.948206 |
| rs11644164     | LRR50     | 16 | 82761440 | 5 | 0.589937 |
| rs2288019      | LRR50     | 16 | 82767135 | 5 | 0.509604 |
| rs2288019      | LRR50     | 16 | 82767135 | 4 | 0.095578 |
| rs2288019      | LRR50     | 16 | 82767135 | 7 | 0.317098 |
| rs2288019      | LRR50     | 16 | 82767135 | 1 | 0.733424 |
| rs2288020      | LRR50     | 16 | 82767239 | 4 | 2.743892 |
| rs2288020      | LRR50     | 16 | 82767239 | 5 | 1.63472  |
| rs2288020      | LRR50     | 16 | 82767239 | 7 | 2.883068 |
| SNP16-82767317 | LRR50     | 16 | 82767317 | 6 | 1.438617 |
| SNP16-82767317 | LRR50     | 16 | 82767317 | 2 | 0.534791 |
| SNP16-82767317 | LRR50     | 16 | 82767317 | 7 | 1.046861 |
| SNP16-82767317 | LRR50     | 16 | 82767317 | 5 | 0.683187 |
| SNP16-82767317 | LRR50     | 16 | 82767317 | 4 | 0.854276 |
| rs2288023      | LRR50     | 16 | 82767365 | 5 | 0.197713 |
| rs2288023      | LRR50     | 16 | 82767365 | 4 | 2.574371 |
| rs2288023      | LRR50     | 16 | 82767365 | 7 | 1.753734 |
| rs2288023      | LRR50     | 16 | 82767365 | 6 | 1.039371 |
| rs2288024      | TAF1C     | 16 | 82768966 | 3 | 0.92041  |
| rs8692         | TAF1C     | 16 | 82768984 | 7 | 1.006367 |
| rs8692         | TAF1C     | 16 | 82768984 | 5 | 0.973578 |
| rs1056616      | TAF1C     | 16 | 82769219 | 1 | 4.283073 |
| rs4150176      | TAF1C     | 16 | 82770211 | 1 | 5.296231 |
| rs3743642      | TAF1C     | 16 | 82770429 | 1 | 4.298835 |
| rs2230129      | TAF1C     | 16 | 82770935 | 2 | 1.118785 |
| rs2230129      | TAF1C     | 16 | 82770935 | 1 | 0.156834 |
| rs2230129      | TAF1C     | 16 | 82770935 | 5 | 0.275331 |
| rs2230129      | TAF1C     | 16 | 82770935 | 7 | 0.143994 |
| rs2230129      | TAF1C     | 16 | 82770935 | 4 | 0.105894 |
| rs8044351      | ADAD2     | 16 | 82782306 | 4 | 0.332077 |
| rs8044351      | ADAD2     | 16 | 82782306 | 7 | 0.964281 |
| rs11646787     | LOC654780 | 16 | 82785738 | 1 | 0.058052 |
| rs11646787     | LOC654780 | 16 | 82785738 | 3 | 0.152752 |
| rs11646787     | LOC654780 | 16 | 82785738 | 8 | 3.770601 |
| rs11149631     | ADAD2     | 16 | 82786271 | 8 | 1.496228 |
| rs11865115     | ADAD2     | 16 | 82786374 | 1 | 0.47596  |
| rs11865115     | ADAD2     | 16 | 82786374 | 8 | 0.27918  |
| rs11865115     | ADAD2     | 16 | 82786374 | 3 | 2.532094 |
| rs2303238      | ADAD2     | 16 | 82787060 | 3 | 0.308198 |
| rs2303239      | ADAD2     | 16 | 82787081 | 5 | 0.000783 |
| rs2303243      | LOC654780 | 16 | 82788001 | 1 | 1.408127 |
| rs2303243      | LOC654780 | 16 | 82788001 | 5 | 0.955108 |
| rs2303243      | LOC654780 | 16 | 82788001 | 3 | 1.545785 |
| rs244811       | KCNG4     | 16 | 82827882 | 7 | 0.160966 |
| rs244811       | KCNG4     | 16 | 82827882 | 3 | 0.249568 |
| rs12933084     | WFDC1     | 16 | 82918034 | 5 | 1.599913 |
| rs12933084     | WFDC1     | 16 | 82918034 | 4 | 2.350497 |

|                |          |    |          |   |          |
|----------------|----------|----|----------|---|----------|
| rs12933084     | WFDC1    | 16 | 82918034 | 7 | 1.136945 |
| rs2303853      | ATP2C2   | 16 | 83031985 | 2 | 4.15237  |
| rs2241640      | ATP2C2   | 16 | 83051776 | 2 | 2.528776 |
| rs2241640      | ATP2C2   | 16 | 83051776 | 7 | 0.185407 |
| rs2241640      | ATP2C2   | 16 | 83051776 | 6 | 0.679624 |
| rs2241640      | ATP2C2   | 16 | 83051776 | 1 | 0.139659 |
| rs2241633      | ATP2C2   | 16 | 83055081 | 7 | 7.03028  |
| rs2241633      | ATP2C2   | 16 | 83055081 | 3 | 0.083174 |
| rs3826150      | KIAA1609 | 16 | 83068966 | 7 | 0.658182 |
| rs3826150      | KIAA1609 | 16 | 83068966 | 5 | 4.77048  |
| rs3826150      | KIAA1609 | 16 | 83068966 | 1 | 3.657559 |
| rs3826150      | KIAA1609 | 16 | 83068966 | 3 | 0.009867 |
| rs433293       | KIAA1609 | 16 | 83073810 | 8 | 0.284089 |
| rs433293       | KIAA1609 | 16 | 83073810 | 1 | 2.730268 |
| rs433293       | KIAA1609 | 16 | 83073810 | 4 | 0.560457 |
| rs433293       | KIAA1609 | 16 | 83073810 | 7 | 1.057639 |
| rs3743667      | KIAA1609 | 16 | 83077793 | 1 | 5.385835 |
| rs436278       | KIAA1609 | 16 | 83080398 | 4 | 0.946762 |
| rs436278       | KIAA1609 | 16 | 83080398 | 7 | 0.565926 |
| rs1047121      | COTL1    | 16 | 83156905 | 4 | 0.555891 |
| rs1047121      | COTL1    | 16 | 83156905 | 3 | 0.728645 |
| rs1047121      | COTL1    | 16 | 83156905 | 8 | 0.803363 |
| rs1047121      | COTL1    | 16 | 83156905 | 5 | 0.369906 |
| rs1047121      | COTL1    | 16 | 83156905 | 2 | 7.989465 |
| rs7458         | COTL1    | 16 | 83157031 | 1 | 3.507356 |
| rs13521        | COTL1    | 16 | 83157471 | 8 | 8.944488 |
| rs13521        | COTL1    | 16 | 83157471 | 5 | 6.367229 |
| rs13521        | COTL1    | 16 | 83157471 | 7 | 0.168382 |
| rs12932018     | USP10    | 16 | 83354104 | 7 | 0.76422  |
| rs12932018     | USP10    | 16 | 83354104 | 1 | 4.562956 |
| rs2172623      | CRISPLD2 | 16 | 83411123 | 8 | 0.260435 |
| rs2172623      | CRISPLD2 | 16 | 83411123 | 1 | 1.971838 |
| SNP16-83436965 | CRISPLD2 | 16 | 83436965 | 7 | 0.596573 |
| SNP16-83436965 | CRISPLD2 | 16 | 83436965 | 4 | 1.063745 |
| SNP16-83436965 | CRISPLD2 | 16 | 83436965 | 6 | 0.126006 |
| SNP16-83436965 | CRISPLD2 | 16 | 83436965 | 2 | 3.789832 |
| rs8061351      | CRISPLD2 | 16 | 83440603 | 5 | 0.701699 |
| SNP16-83459984 | CRISPLD2 | 16 | 83459984 | 7 | 0.153555 |
| SNP16-83459984 | CRISPLD2 | 16 | 83459984 | 8 | 0.473981 |
| rs721005       | CRISPLD2 | 16 | 83463599 | 1 | 0.586113 |
| rs767050       | CRISPLD2 | 16 | 83480360 | 3 | 0.988821 |
| rs1874008      | CRISPLD2 | 16 | 83497980 | 3 | 0.524883 |
| rs1874008      | CRISPLD2 | 16 | 83497980 | 5 | 3.78281  |
| rs3803632      | CRISPLD2 | 16 | 83498026 | 4 | 0.357547 |
| rs3803632      | CRISPLD2 | 16 | 83498026 | 6 | 0.509439 |
| rs4783099      | CRISPLD2 | 16 | 83498830 | 3 | 1.354294 |
| rs7195377      | ZDHHC7   | 16 | 83567471 | 8 | 6.01939  |

|                |           |    |          |   |          |
|----------------|-----------|----|----------|---|----------|
| rs7195377      | ZDHH7     | 16 | 83567471 | 4 | 0.12693  |
| rs7195377      | ZDHH7     | 16 | 83567471 | 6 | 1.926032 |
| rs7195377      | ZDHH7     | 16 | 83567471 | 3 | 0.064412 |
| rs7195377      | ZDHH7     | 16 | 83567471 | 1 | 3.385982 |
| rs16975086     | ZDHH7     | 16 | 83573042 | 3 | 0.131599 |
| rs16975086     | ZDHH7     | 16 | 83573042 | 8 | 7.376009 |
| rs16975086     | ZDHH7     | 16 | 83573042 | 1 | 4.41005  |
| rs7186182      | KIAA0513  | 16 | 83681783 | 2 | 3.402351 |
| rs16975222     | KIAA0513  | 16 | 83683961 | 4 | 0.281822 |
| rs16975222     | KIAA0513  | 16 | 83683961 | 5 | 0.565423 |
| rs16975222     | KIAA0513  | 16 | 83683961 | 1 | 0.403843 |
| rs16975222     | KIAA0513  | 16 | 83683961 | 2 | 0.058147 |
| rs715707       | KIAA0513  | 16 | 83684973 | 2 | 7.135839 |
| rs4565         | GINS2     | 16 | 84268912 | 4 | 0.527113 |
| rs4565         | GINS2     | 16 | 84268912 | 5 | 0.121447 |
| rs4565         | GINS2     | 16 | 84268912 | 3 | 0.001197 |
| rs8587         | COX4NB    | 16 | 84370732 | 1 | 4.100687 |
| rs8587         | COX4NB    | 16 | 84370732 | 8 | 0.687862 |
| GA031728       | COX4I1    | 16 | 84392319 | 8 | 5.078588 |
| rs17444416     | IRF8      | 16 | 84505599 | 1 | 1.781357 |
| rs17444416     | IRF8      | 16 | 84505599 | 6 | 1.325122 |
| rs7204236      | LOC283904 | 16 | 85079989 | 1 | 0.698263 |
| rs43140        | LOC283904 | 16 | 85081584 | 1 | 1.165123 |
| rs1364225      | LOC283904 | 16 | 85100527 | 3 | 0.292668 |
| rs11860845     | FOXF1     | 16 | 85104997 | 5 | 1.053539 |
| rs11860845     | FOXF1     | 16 | 85104997 | 3 | 0.632552 |
| rs16964183     | LOC401865 | 16 | 85117143 | 2 | 0.078195 |
| rs16964183     | LOC401865 | 16 | 85117143 | 1 | 0.595306 |
| rs16944719     | MTHFSD    | 16 | 85122688 | 1 | 4.091643 |
| rs16944719     | MTHFSD    | 16 | 85122688 | 3 | 1.286409 |
| rs34005514     | MTHFSD    | 16 | 85143244 | 1 | 6.21905  |
| rs34005514     | MTHFSD    | 16 | 85143244 | 3 | 0.167891 |
| rs387148       | LOC729979 | 16 | 85325973 | 7 | 1.073417 |
| rs387148       | LOC729979 | 16 | 85325973 | 2 | 6.213938 |
| rs2288482      | FBXO31    | 16 | 85922164 | 5 | 0.861005 |
| rs2288482      | FBXO31    | 16 | 85922164 | 4 | 0.305507 |
| rs9903         | MAP1LC3B  | 16 | 85994608 | 3 | 0.458084 |
| rs918368       | JPH3      | 16 | 86235645 | 3 | 0.36682  |
| rs17699859     | KLHDC4    | 16 | 86346337 | 4 | 0.380112 |
| rs2303771      | KLHDC4    | 16 | 86346365 | 8 | 5.035156 |
| rs2303771      | KLHDC4    | 16 | 86346365 | 7 | 1.07494  |
| rs2303771      | KLHDC4    | 16 | 86346365 | 4 | 1.748595 |
| rs2303772      | KLHDC4    | 16 | 86353081 | 4 | 0.112477 |
| SNP16-87126524 | ZFPM1     | 16 | 87126524 | 4 | 1.713149 |
| SNP16-87126524 | ZFPM1     | 16 | 87126524 | 7 | 0.553279 |
| rs2879897      | C16orf85  | 16 | 87147696 | 3 | 1.277762 |
| rs8057773      | C16orf85  | 16 | 87160848 | 1 | 3.186863 |

|                |          |    |          |   |          |
|----------------|----------|----|----------|---|----------|
| rs8057773      | C16orf85 | 16 | 87160848 | 4 | 1.03571  |
| rs6500476      | C16orf85 | 16 | 87160855 | 7 | 0.090976 |
| rs6500476      | C16orf85 | 16 | 87160855 | 3 | 0.449037 |
| rs4782451      | C16orf85 | 16 | 87161479 | 4 | 1.088167 |
| rs4782451      | C16orf85 | 16 | 87161479 | 3 | 0.505571 |
| rs4782451      | C16orf85 | 16 | 87161479 | 7 | 0.683024 |
| rs4782451      | C16orf85 | 16 | 87161479 | 6 | 1.516218 |
| rs11646848     | C16orf85 | 16 | 87162811 | 4 | 0.008841 |
| rs11646848     | C16orf85 | 16 | 87162811 | 3 | 0.585315 |
| rs12599209     | C16orf85 | 16 | 87163569 | 4 | 1.188906 |
| rs12599209     | C16orf85 | 16 | 87163569 | 3 | 1.260055 |
| rs899728       | ZC3H18   | 16 | 87171506 | 3 | 0.268243 |
| rs899728       | ZC3H18   | 16 | 87171506 | 1 | 4.046452 |
| rs899728       | ZC3H18   | 16 | 87171506 | 7 | 0.173782 |
| rs2306049      | RNF166   | 16 | 87295270 | 5 | 0.015717 |
| rs2306049      | RNF166   | 16 | 87295270 | 2 | 3.771344 |
| rs2306049      | RNF166   | 16 | 87295270 | 8 | 0.445467 |
| rs2306049      | RNF166   | 16 | 87295270 | 6 | 0.679674 |
| rs2306049      | RNF166   | 16 | 87295270 | 4 | 0.148799 |
| rs2290896      | C16orf84 | 16 | 87306533 | 5 | 0.052404 |
| rs2290896      | C16orf84 | 16 | 87306533 | 2 | 5.717807 |
| rs6500493      | FLJ45121 | 16 | 87331483 | 1 | 6.217164 |
| rs10775348     | FLJ45121 | 16 | 87333849 | 5 | 0.747444 |
| rs10775348     | FLJ45121 | 16 | 87333849 | 1 | 0.719609 |
| rs2016979      | FLJ45121 | 16 | 87334593 | 6 | 0.027588 |
| rs2016979      | FLJ45121 | 16 | 87334593 | 2 | 0.302498 |
| rs2016979      | FLJ45121 | 16 | 87334593 | 4 | 0.280194 |
| rs2016979      | FLJ45121 | 16 | 87334593 | 5 | 0.120269 |
| rs750739       | FLJ45121 | 16 | 87335109 | 4 | 0.426442 |
| rs750739       | FLJ45121 | 16 | 87335109 | 5 | 1.372262 |
| rs9925084      | FLJ40448 | 16 | 87336935 | 2 | 0.354433 |
| rs475667       | CDT1     | 16 | 87398468 | 7 | 0.939846 |
| rs510862       | CDT1     | 16 | 87400012 | 7 | 0.821985 |
| rs510862       | CDT1     | 16 | 87400012 | 3 | 0.354791 |
| rs572275       | CDT1     | 16 | 87402133 | 2 | 0.951046 |
| rs572275       | CDT1     | 16 | 87402133 | 3 | 0.89172  |
| rs572275       | CDT1     | 16 | 87402133 | 1 | 0.489878 |
| rs572275       | CDT1     | 16 | 87402133 | 4 | 0.515093 |
| SNP16-87418741 | GALNS    | 16 | 87418741 | 1 | 5.345336 |
| SNP16-87418741 | GALNS    | 16 | 87418741 | 7 | 6.031664 |
| SNP16-87418741 | GALNS    | 16 | 87418741 | 6 | 5.226037 |
| rs3743979      | ACSF3    | 16 | 87708384 | 7 | 0.281636 |
| rs3743979      | ACSF3    | 16 | 87708384 | 2 | 4.084808 |
| GA013636       | CDH15    | 16 | 87787494 | 1 | 1.032585 |
| GA013636       | CDH15    | 16 | 87787494 | 3 | 0.965745 |
| rs9937322      | C16orf55 | 16 | 88263424 | 2 | 2.270641 |
| rs9937322      | C16orf55 | 16 | 88263424 | 7 | 6.767893 |

|                |           |    |          |   |          |
|----------------|-----------|----|----------|---|----------|
| rs9937322      | C16orf55  | 16 | 88263424 | 4 | 0.887441 |
| rs9937322      | C16orf55  | 16 | 88263424 | 1 | 0.493697 |
| rs17177787     | C16orf55  | 16 | 88264414 | 5 | 1.263071 |
| rs3751680      | C16orf55  | 16 | 88264830 | 5 | 0.927806 |
| rs3803690      | SPATA2L   | 16 | 88290860 | 4 | 1.268739 |
| rs3803690      | SPATA2L   | 16 | 88290860 | 3 | 0.22719  |
| rs17177891     | ZNF276    | 16 | 88327451 | 2 | 3.467033 |
| rs17232910     | FANCA     | 16 | 88367267 | 2 | 3.161019 |
| rs1800331      | FANCA     | 16 | 88385918 | 2 | 0.331898 |
| SNP16-88505105 | TCF25     | 16 | 88505105 | 6 | 6.043647 |
| SNP16-88505105 | TCF25     | 16 | 88505105 | 7 | 0.182745 |
| SNP16-88505105 | TCF25     | 16 | 88505105 | 4 | 4.563032 |
| rs3212363      | MC1R      | 16 | 88512942 | 8 | 4.256418 |
| rs3212363      | MC1R      | 16 | 88512942 | 1 | 1.927919 |
| rs3212363      | MC1R      | 16 | 88512942 | 3 | 0.229637 |
| rs1805005      | MC1R      | 16 | 88513345 | 1 | 0.241987 |
| rs2228479      | MC1R      | 16 | 88513441 | 2 | 2.122691 |
| rs1805008      | MC1R      | 16 | 88513645 | 1 | 4.180152 |
| rs885479       | MC1R      | 16 | 88513655 | 8 | 0.953328 |
| rs4408545      | AFG3L1    | 16 | 88571529 | 1 | 0.663089 |
| rs4408545      | AFG3L1    | 16 | 88571529 | 2 | 0.963336 |
| rs4408545      | AFG3L1    | 16 | 88571529 | 7 | 0.913238 |
| rs4408545      | AFG3L1    | 16 | 88571529 | 3 | 0.959294 |
| rs2241085      | DBNDD1    | 16 | 88599766 | 6 | 0.407883 |
| rs4362387      | DBNDD1    | 16 | 88602727 | 2 | 5.345217 |
| rs3785183      | C16orf3   | 16 | 88623062 | 3 | 0.924398 |
| rs3785183      | C16orf3   | 16 | 88623062 | 7 | 0.568972 |
| rs12925087     | C16orf3   | 16 | 88623568 | 3 | 1.224099 |
| rs17178299     | GAS8      | 16 | 88631160 | 2 | 4.7236   |
| SNP16-88638451 | GAS8      | 16 | 88638451 | 8 | 0.421189 |
| SNP16-88638451 | GAS8      | 16 | 88638451 | 1 | 4.736389 |
| rs8046635      | PRDM7     | 16 | 88650994 | 1 | 0.264037 |
| rs3809643      | PRDM7     | 16 | 88651774 | 1 | 0.834565 |
| rs2396789      | FLJ43681  | 17 | 8547     | 1 | 0.010949 |
| rs9907477      | NULL      | 17 | 62646    | 1 | 4.97298  |
| rs9907477      | NULL      | 17 | 62646    | 7 | 0.583825 |
| rs9896436      | KRTAP2-2  | 17 | 73422    | 7 | 1.590909 |
| rs8078929      | LOC729000 | 17 | 78232    | 1 | 3.467543 |
| rs9675043      | LOC729000 | 17 | 78382    | 1 | 1.836348 |
| rs9675043      | LOC729000 | 17 | 78382    | 7 | 0.218289 |
| rs9675043      | LOC729000 | 17 | 78382    | 4 | 0.090139 |
| rs9675043      | LOC729000 | 17 | 78382    | 8 | 0.430281 |
| rs12603796     | LOC728901 | 17 | 87761    | 5 | 0.57893  |
| rs7223759      | LOC728956 | 17 | 102209   | 7 | 0.127473 |
| rs9900685      | LOC728860 | 17 | 103469   | 3 | 0.307672 |
| rs7208188      | LOC728860 | 17 | 113034   | 1 | 1.666371 |
| rs7208188      | LOC728860 | 17 | 113034   | 7 | 0.659646 |

|               |           |    |         |   |          |
|---------------|-----------|----|---------|---|----------|
| rs12947571    | LOC728860 | 17 | 113794  | 8 | 0.979192 |
| rs12947571    | LOC728860 | 17 | 113794  | 1 | 4.968399 |
| rs10871511    | LOC728824 | 17 | 126701  | 3 | 0.775789 |
| rs7223270     | LOC728824 | 17 | 128389  | 1 | 3.860306 |
| rs9789059     | LOC646301 | 17 | 129225  | 1 | 1.900587 |
| rs9788983     | LOC646301 | 17 | 129457  | 3 | 0.444907 |
| rs9788983     | LOC646301 | 17 | 129457  | 7 | 0.676921 |
| rs9788983     | LOC646301 | 17 | 129457  | 1 | 0.62448  |
| rs11867532    | LOC728760 | 17 | 146428  | 7 | 0.139128 |
| rs4556857     | LOC644132 | 17 | 173906  | 3 | 0.927321 |
| rs4556857     | LOC644132 | 17 | 173906  | 7 | 0.691057 |
| rs7224337     | LOC644132 | 17 | 174121  | 3 | 0.968298 |
| rs8069166     | FAM101B   | 17 | 293366  | 8 | 1.23571  |
| rs7813        | GEMIN4    | 17 | 594936  | 2 | 4.16369  |
| rs7813        | GEMIN4    | 17 | 594936  | 6 | 6.555669 |
| rs7813        | GEMIN4    | 17 | 594936  | 4 | 1.143422 |
| rs3744741     | GEMIN4    | 17 | 595982  | 7 | 0.19962  |
| rs2740348     | GEMIN4    | 17 | 596685  | 6 | 0.011302 |
| rs2740348     | GEMIN4    | 17 | 596685  | 1 | 4.901728 |
| rs2740348     | GEMIN4    | 17 | 596685  | 4 | 1.002076 |
| rs16955542    | RNMTL1    | 17 | 632356  | 6 | 0.085976 |
| rs2273454     | RNMTL1    | 17 | 632390  | 7 | 0.041763 |
| rs540226      | NXN       | 17 | 650152  | 2 | 0.82432  |
| rs540226      | NXN       | 17 | 650152  | 7 | 2.751872 |
| rs540226      | NXN       | 17 | 650152  | 3 | 0.90627  |
| rs540226      | NXN       | 17 | 650152  | 5 | 4.442876 |
| rs540226      | NXN       | 17 | 650152  | 1 | 1.969439 |
| rs3744755     | ABR       | 17 | 854979  | 7 | 4.540375 |
| rs3744755     | ABR       | 17 | 854979  | 1 | 4.430745 |
| rs3263        | ABR       | 17 | 855545  | 1 | 3.730688 |
| SNP17-906036  | ABR       | 17 | 906036  | 7 | 0.076984 |
| rs6502774     | TUSC5     | 17 | 1130104 | 5 | 1.938039 |
| rs6502774     | TUSC5     | 17 | 1130104 | 4 | 0.652977 |
| rs6502774     | TUSC5     | 17 | 1130104 | 8 | 3.56527  |
| rs6502774     | TUSC5     | 17 | 1130104 | 7 | 1.645769 |
| rs4790289     | TUSC5     | 17 | 1150431 | 4 | 0.595831 |
| rs4790289     | TUSC5     | 17 | 1150431 | 1 | 0.751345 |
| rs4790289     | TUSC5     | 17 | 1150431 | 3 | 0.414471 |
| rs2302458     | MYO1C     | 17 | 1317292 | 8 | 0.360472 |
| SNP17-1320268 | MYO1C     | 17 | 1320268 | 5 | 4.851425 |
| SNP17-1320268 | MYO1C     | 17 | 1320268 | 2 | 4.880104 |
| SNP17-1320268 | MYO1C     | 17 | 1320268 | 7 | 0.050233 |
| SNP17-1583684 | WDR81     | 17 | 1583684 | 6 | 1.875731 |
| rs8065251     | WDR81     | 17 | 1584208 | 5 | 0.352608 |
| rs8065251     | WDR81     | 17 | 1584208 | 4 | 0.687479 |
| rs2070862     | SERPINF2  | 17 | 1595044 | 3 | 0.044315 |
| rs2070862     | SERPINF2  | 17 | 1595044 | 5 | 0.746602 |

|               |            |    |         |   |          |
|---------------|------------|----|---------|---|----------|
| rs6828        | SERPINF1   | 17 | 1626752 | 8 | 6.36505  |
| rs9902398     | SMYD4      | 17 | 1633160 | 8 | 5.378359 |
| SNP17-1729702 | RPA1       | 17 | 1729702 | 3 | 0.806626 |
| rs2230930     | RPA1       | 17 | 1729707 | 4 | 7.39075  |
| rs2230930     | RPA1       | 17 | 1729707 | 6 | 2.964532 |
| rs2230930     | RPA1       | 17 | 1729707 | 1 | 2.968831 |
| rs2230930     | RPA1       | 17 | 1729707 | 3 | 0.289095 |
| rs9906592     | RTN4RL1    | 17 | 1786022 | 8 | 2.845343 |
| rs9906592     | RTN4RL1    | 17 | 1786022 | 5 | 0.882163 |
| rs2236375     | DPH1-OVCA2 | 17 | 1890638 | 6 | 0.800356 |
| rs2236375     | DPH1-OVCA2 | 17 | 1890638 | 3 | 1.412637 |
| rs1051322     | DPH1-OVCA2 | 17 | 1893253 | 2 | 8.70165  |
| rs1051322     | DPH1-OVCA2 | 17 | 1893253 | 4 | 0.440543 |
| rs1051322     | DPH1-OVCA2 | 17 | 1893253 | 3 | 0.199286 |
| rs1051322     | DPH1-OVCA2 | 17 | 1893253 | 1 | 0.014375 |
| rs1051322     | DPH1-OVCA2 | 17 | 1893253 | 8 | 0.195367 |
| rs1051322     | DPH1-OVCA2 | 17 | 1893253 | 5 | 0.484711 |
| rs903157      | SMG6       | 17 | 1911147 | 3 | 0.611681 |
| rs903157      | SMG6       | 17 | 1911147 | 6 | 9.222008 |
| rs1885986     | SMG6       | 17 | 2149925 | 2 | 0.642375 |
| rs1885986     | SMG6       | 17 | 2149925 | 3 | 1.047612 |
| rs1885986     | SMG6       | 17 | 2149925 | 8 | 0.364661 |
| rs1885986     | SMG6       | 17 | 2149925 | 1 | 0.002039 |
| SNP17-2174405 | SRR        | 17 | 2174405 | 3 | 0.477141 |
| rs4613098     | LOC284009  | 17 | 2265300 | 5 | 0.044623 |
| rs4613098     | LOC284009  | 17 | 2265300 | 3 | 0.387983 |
| rs4613098     | LOC284009  | 17 | 2265300 | 6 | 2.340182 |
| rs4613098     | LOC284009  | 17 | 2265300 | 4 | 0.332143 |
| rs4613098     | LOC284009  | 17 | 2265300 | 7 | 0.629803 |
| rs4790335     | LOC284009  | 17 | 2265445 | 5 | 0.247893 |
| rs4790335     | LOC284009  | 17 | 2265445 | 4 | 3.025226 |
| rs4790335     | LOC284009  | 17 | 2265445 | 7 | 0.603747 |
| rs4790335     | LOC284009  | 17 | 2265445 | 1 | 3.210924 |
| rs4790115     | GARNL4     | 17 | 2877089 | 5 | 5.312607 |
| rs4790115     | GARNL4     | 17 | 2877089 | 8 | 4.190708 |
| rs4790115     | GARNL4     | 17 | 2877089 | 7 | 0.520039 |
| rs4790115     | GARNL4     | 17 | 2877089 | 1 | 4.550014 |
| rs4790115     | GARNL4     | 17 | 2877089 | 3 | 0.719396 |
| rs4264423     | GARNL4     | 17 | 2886332 | 1 | 4.8036   |
| rs4264423     | GARNL4     | 17 | 2886332 | 6 | 0.189747 |
| rs4264423     | GARNL4     | 17 | 2886332 | 3 | 0.708151 |
| rs769426      | OR1A1      | 17 | 3066423 | 5 | 0.909471 |
| rs769427      | OR1A1      | 17 | 3066517 | 1 | 1.088397 |
| rs2013809     | OR3A2      | 17 | 3128305 | 5 | 1.960358 |
| rs9903671     | OR3A4      | 17 | 3160661 | 7 | 0.10502  |
| rs231678      | OR3A4      | 17 | 3160931 | 8 | 1.920532 |
| rs11556563    | SPATA22    | 17 | 3299059 | 8 | 3.55756  |



|               |         |    |         |   |          |
|---------------|---------|----|---------|---|----------|
| rs11556563    | SPATA22 | 17 | 3299059 | 7 | 4.209235 |
| rs11556563    | SPATA22 | 17 | 3299059 | 5 | 5.114294 |
| rs12948217    | ASPA    | 17 | 3344452 | 8 | 1.181793 |
| rs12948217    | ASPA    | 17 | 3344452 | 2 | 0.866337 |
| rs12948217    | ASPA    | 17 | 3344452 | 1 | 0.272907 |
| rs7208811     | TRPV3   | 17 | 3363305 | 7 | 0.338305 |
| rs7208811     | TRPV3   | 17 | 3363305 | 5 | 3.473275 |
| rs7208811     | TRPV3   | 17 | 3363305 | 8 | 0.303122 |
| rs395357      | TRPV3   | 17 | 3382830 | 8 | 0.827388 |
| rs395357      | TRPV3   | 17 | 3382830 | 6 | 1.383153 |
| rs395357      | TRPV3   | 17 | 3382830 | 5 | 0.686713 |
| rs395357      | TRPV3   | 17 | 3382830 | 3 | 3.351912 |
| rs11078458    | TRPV3   | 17 | 3392651 | 1 | 3.41602  |
| rs11078458    | TRPV3   | 17 | 3392651 | 3 | 4.405721 |
| rs11078458    | TRPV3   | 17 | 3392651 | 6 | 4.498836 |
| rs11078458    | TRPV3   | 17 | 3392651 | 5 | 0.415318 |
| SNP17-3393635 | TRPV3   | 17 | 3393635 | 1 | 2.692931 |
| SNP17-3393635 | TRPV3   | 17 | 3393635 | 2 | 1.045931 |
| SNP17-3393635 | TRPV3   | 17 | 3393635 | 5 | 0.07745  |
| SNP17-3393635 | TRPV3   | 17 | 3393635 | 6 | 1.211413 |
| rs1039519     | TRPV3   | 17 | 3394664 | 5 | 0.688507 |
| rs1039519     | TRPV3   | 17 | 3394664 | 3 | 2.743533 |
| rs1039519     | TRPV3   | 17 | 3394664 | 1 | 1.615789 |
| rs1039519     | TRPV3   | 17 | 3394664 | 2 | 1.926236 |
| rs1039519     | TRPV3   | 17 | 3394664 | 6 | 0.64369  |
| rs4790522     | TRPV1   | 17 | 3416603 | 3 | 0.161856 |
| rs4790522     | TRPV1   | 17 | 3416603 | 1 | 0.73453  |
| rs222747      | TRPV1   | 17 | 3439949 | 4 | 1.503413 |
| rs222747      | TRPV1   | 17 | 3439949 | 6 | 4.755636 |
| rs222747      | TRPV1   | 17 | 3439949 | 5 | 0.605054 |
| rs222749      | TRPV1   | 17 | 3442123 | 1 | 4.16479  |
| rs222749      | TRPV1   | 17 | 3442123 | 7 | 5.494768 |
| rs460716      | TRPV1   | 17 | 3458557 | 5 | 4.309601 |
| rs460716      | TRPV1   | 17 | 3458557 | 7 | 0.407017 |
| rs150857      | CARKL   | 17 | 3473386 | 7 | 0.785401 |
| rs17707869    | CTNS    | 17 | 3486791 | 7 | 5.015667 |
| rs1048682     | CTNS    | 17 | 3511528 | 1 | 5.322126 |
| rs160589      | TAX1BP3 | 17 | 3518612 | 3 | 0.373758 |
| rs3744679     | ITGAE   | 17 | 3582489 | 3 | 0.406872 |
| rs9135        | CAMKK1  | 17 | 3710682 | 7 | 4.612816 |
| rs2532947     | CAMKK1  | 17 | 3715428 | 3 | 1.290769 |
| rs7214864     | CAMKK1  | 17 | 3722665 | 4 | 1.201355 |
| rs917605      | ATP2A3  | 17 | 3774251 | 7 | 0.537506 |
| rs887387      | ATP2A3  | 17 | 3775451 | 2 | 2.691376 |
| rs3179783     | ATP2A3  | 17 | 3787677 | 3 | 0.516647 |
| rs3179783     | ATP2A3  | 17 | 3787677 | 8 | 1.603097 |
| rs3179783     | ATP2A3  | 17 | 3787677 | 5 | 0.330616 |

|            |           |    |         |   |          |
|------------|-----------|----|---------|---|----------|
| rs1052617  | ZZEF1     | 17 | 3856153 | 6 | 5.656858 |
| rs1052617  | ZZEF1     | 17 | 3856153 | 2 | 4.151622 |
| rs1052617  | ZZEF1     | 17 | 3856153 | 5 | 0.401896 |
| rs1052617  | ZZEF1     | 17 | 3856153 | 3 | 0.416321 |
| rs1052617  | ZZEF1     | 17 | 3856153 | 7 | 0.151622 |
| rs8075562  | ZZEF1     | 17 | 3863572 | 2 | 3.202737 |
| rs8075562  | ZZEF1     | 17 | 3863572 | 3 | 0.380369 |
| rs1006954  | ZZEF1     | 17 | 3894282 | 1 | 2.917288 |
| rs1043592  | ANKFY1    | 17 | 4014064 | 2 | 6.159711 |
| rs1043592  | ANKFY1    | 17 | 4014064 | 3 | 0.099862 |
| rs1043592  | ANKFY1    | 17 | 4014064 | 5 | 0.490489 |
| rs1043587  | ANKFY1    | 17 | 4014301 | 8 | 10.20184 |
| rs11655342 | SPNS3     | 17 | 4303124 | 8 | 0.016256 |
| rs11655342 | SPNS3     | 17 | 4303124 | 6 | 0.992379 |
| rs11655342 | SPNS3     | 17 | 4303124 | 5 | 1.756478 |
| rs11655342 | SPNS3     | 17 | 4303124 | 1 | 1.736763 |
| rs333121   | SPNS3     | 17 | 4338179 | 7 | 3.061323 |
| rs333121   | SPNS3     | 17 | 4338179 | 8 | 2.094297 |
| rs333121   | SPNS3     | 17 | 4338179 | 1 | 2.584515 |
| rs3809849  | MYBBP1A   | 17 | 4405347 | 1 | 0.753027 |
| rs3809849  | MYBBP1A   | 17 | 4405347 | 6 | 3.115903 |
| rs3809849  | MYBBP1A   | 17 | 4405347 | 2 | 0.489853 |
| rs7216284  | GGT6      | 17 | 4410448 | 6 | 1.646307 |
| rs7216284  | GGT6      | 17 | 4410448 | 1 | 4.12606  |
| rs7216474  | GGT6      | 17 | 4410545 | 2 | 1.859186 |
| rs7216474  | GGT6      | 17 | 4410545 | 6 | 2.80634  |
| rs7216474  | GGT6      | 17 | 4410545 | 1 | 1.7018   |
| rs4790654  | SMTNL2    | 17 | 4442431 | 5 | 0.269639 |
| rs12103697 | SMTNL2    | 17 | 4445360 | 1 | 1.43419  |
| rs12103697 | SMTNL2    | 17 | 4445360 | 5 | 0.41583  |
| rs916055   | ALOX15    | 17 | 4481583 | 3 | 0.544819 |
| rs743646   | ALOX15    | 17 | 4482990 | 5 | 0.657614 |
| rs743646   | ALOX15    | 17 | 4482990 | 3 | 0.385191 |
| rs8081507  | PELP1     | 17 | 4524699 | 1 | 3.293513 |
| rs9895782  | LOC728244 | 17 | 4555207 | 1 | 3.766729 |
| rs3826517  | ZMYND15   | 17 | 4592073 | 3 | 1.932047 |
| rs3826517  | ZMYND15   | 17 | 4592073 | 2 | 4.7991   |
| rs3826517  | ZMYND15   | 17 | 4592073 | 8 | 1.224432 |
| rs3826517  | ZMYND15   | 17 | 4592073 | 5 | 5.761061 |
| rs3826517  | ZMYND15   | 17 | 4592073 | 6 | 2.413108 |
| rs2279961  | VMO1      | 17 | 4636053 | 1 | 4.671741 |
| rs4790706  | VMO1      | 17 | 4636312 | 2 | 4.265812 |
| rs4790706  | VMO1      | 17 | 4636312 | 3 | 1.424759 |
| rs4790706  | VMO1      | 17 | 4636312 | 5 | 0.701112 |
| rs4790706  | VMO1      | 17 | 4636312 | 8 | 0.3825   |
| rs12951761 | GLTPD2    | 17 | 4639794 | 3 | 1.276023 |
| rs12951761 | GLTPD2    | 17 | 4639794 | 2 | 3.992582 |

|               |          |    |         |   |          |
|---------------|----------|----|---------|---|----------|
| rs12951761    | GLTPD2   | 17 | 4639794 | 5 | 0.267974 |
| GA031922      | PSMB6    | 17 | 4647046 | 6 | 0.278036 |
| rs7211943     | PLD2     | 17 | 4659359 | 7 | 6.928855 |
| rs11556635    | MINK1    | 17 | 4737062 | 6 | 1.673606 |
| rs11556635    | MINK1    | 17 | 4737062 | 2 | 0.039284 |
| rs11556635    | MINK1    | 17 | 4737062 | 5 | 0.66217  |
| rs33970119    | CHRNE    | 17 | 4745681 | 8 | 0.669315 |
| rs33970119    | CHRNE    | 17 | 4745681 | 4 | 1.049233 |
| rs33970119    | CHRNE    | 17 | 4745681 | 5 | 0.564067 |
| rs6065        | GP1BA    | 17 | 4777161 | 3 | 0.156474 |
| rs238234      | CAMTA2   | 17 | 4824542 | 4 | 3.870743 |
| rs238234      | CAMTA2   | 17 | 4824542 | 5 | 0.790059 |
| SNP17-4832900 | INCA1    | 17 | 4832900 | 1 | 0.131263 |
| SNP17-4832900 | INCA1    | 17 | 4832900 | 3 | 0.082258 |
| SNP17-4832900 | INCA1    | 17 | 4832900 | 2 | 0.27194  |
| rs2304445     | GPR172B  | 17 | 4877622 | 4 | 1.831406 |
| rs2304445     | GPR172B  | 17 | 4877622 | 5 | 1.969235 |
| rs3744704     | GPR172B  | 17 | 4878925 | 3 | 0.486146 |
| rs3744705     | ZFP3     | 17 | 4937694 | 1 | 3.554057 |
| rs3744705     | ZFP3     | 17 | 4937694 | 3 | 0.537653 |
| rs3744706     | ZFP3     | 17 | 4937763 | 4 | 0.910016 |
| rs3744706     | ZFP3     | 17 | 4937763 | 5 | 0.002319 |
| rs12600437    | ZFP3     | 17 | 4938157 | 5 | 0.955068 |
| rs12600437    | ZFP3     | 17 | 4938157 | 4 | 0.519865 |
| rs3744708     | ZFP3     | 17 | 4939576 | 1 | 4.851391 |
| rs3744708     | ZFP3     | 17 | 4939576 | 3 | 7.573606 |
| rs3890287     | USP6     | 17 | 4972892 | 3 | 1.183154 |
| SNP17-4983439 | USP6     | 17 | 4983439 | 1 | 4.681804 |
| SNP17-4983439 | USP6     | 17 | 4983439 | 3 | 3.212642 |
| rs11658877    | USP6     | 17 | 5013040 | 6 | 5.003775 |
| rs11658877    | USP6     | 17 | 5013040 | 5 | 6.587946 |
| rs11658877    | USP6     | 17 | 5013040 | 3 | 4.691195 |
| rs11658877    | USP6     | 17 | 5013040 | 8 | 1.334553 |
| rs11658877    | USP6     | 17 | 5013040 | 4 | 5.39679  |
| rs11658877    | USP6     | 17 | 5013040 | 2 | 5.760955 |
| rs9908414     | ZNF594   | 17 | 5027764 | 5 | 5.04009  |
| rs9908414     | ZNF594   | 17 | 5027764 | 3 | 0.645069 |
| rs9908414     | ZNF594   | 17 | 5027764 | 8 | 0.954078 |
| rs2641256     | C17orf87 | 17 | 5067398 | 1 | 5.294673 |
| rs2641256     | C17orf87 | 17 | 5067398 | 3 | 0.182148 |
| rs2585271     | C17orf87 | 17 | 5067413 | 8 | 4.819813 |
| rs2585271     | C17orf87 | 17 | 5067413 | 3 | 1.188079 |
| SNP17-5212487 | RABEP1   | 17 | 5212487 | 1 | 3.832526 |
| rs10792       | RABEP1   | 17 | 5228903 | 3 | 0.650894 |
| rs10792       | RABEP1   | 17 | 5228903 | 1 | 2.040195 |
| rs10792       | RABEP1   | 17 | 5228903 | 8 | 0.737368 |
| rs1058400     | RABEP1   | 17 | 5229518 | 5 | 0.005945 |

|               |           |    |         |   |          |
|---------------|-----------|----|---------|---|----------|
| rs1058400     | RABEP1    | 17 | 5229518 | 8 | 7.005245 |
| rs1058400     | RABEP1    | 17 | 5229518 | 3 | 0.021313 |
| rs1058400     | RABEP1    | 17 | 5229518 | 2 | 4.882268 |
| rs2301739     | NUP88     | 17 | 5249101 | 3 | 0.741742 |
| rs2301739     | NUP88     | 17 | 5249101 | 1 | 5.266774 |
| rs1058117     | RPAIN     | 17 | 5263930 | 2 | 0.495731 |
| rs1058117     | RPAIN     | 17 | 5263930 | 3 | 3.173266 |
| rs1058117     | RPAIN     | 17 | 5263930 | 6 | 2.542087 |
| rs1058117     | RPAIN     | 17 | 5263930 | 5 | 7.781685 |
| rs1806269     | RPAIN     | 17 | 5263952 | 5 | 2.579197 |
| rs2189335     | RPAIN     | 17 | 5266869 | 2 | 0.87805  |
| rs2189335     | RPAIN     | 17 | 5266869 | 1 | 0.720209 |
| rs2189335     | RPAIN     | 17 | 5266869 | 8 | 7.076888 |
| rs2189335     | RPAIN     | 17 | 5266869 | 3 | 0.874986 |
| rs11653658    | DHX33     | 17 | 5294928 | 6 | 4.735175 |
| rs16954697    | DHX33     | 17 | 5297637 | 6 | 3.75249  |
| rs16954697    | DHX33     | 17 | 5297637 | 1 | 6.22114  |
| rs8069315     | DHX33     | 17 | 5307671 | 5 | 4.670467 |
| rs2309399     | MIS12     | 17 | 5332414 | 8 | 0.292703 |
| rs2309399     | MIS12     | 17 | 5332414 | 5 | 0.090967 |
| rs2309399     | MIS12     | 17 | 5332414 | 3 | 0.798672 |
| rs872569      | LOC728392 | 17 | 5344986 | 5 | 0.592926 |
| rs11653832    | NLRP1     | 17 | 5365630 | 4 | 4.846325 |
| rs11653580    | NLRP1     | 17 | 5365715 | 4 | 5.16901  |
| rs11653580    | NLRP1     | 17 | 5365715 | 6 | 0.366211 |
| rs11653580    | NLRP1     | 17 | 5365715 | 2 | 5.991268 |
| rs11651270    | NLRP1     | 17 | 5365801 | 2 | 2.864865 |
| rs11651270    | NLRP1     | 17 | 5365801 | 4 | 0.078433 |
| rs11651270    | NLRP1     | 17 | 5365801 | 7 | 1.200503 |
| rs11651270    | NLRP1     | 17 | 5365801 | 3 | 4.317286 |
| rs11651270    | NLRP1     | 17 | 5365801 | 5 | 2.314794 |
| rs11651270    | NLRP1     | 17 | 5365801 | 8 | 3.550599 |
| rs34733791    | NLRP1     | 17 | 5378009 | 6 | 1.059344 |
| rs11654427    | NLRP1     | 17 | 5378020 | 3 | 3.253006 |
| rs11657747    | NLRP1     | 17 | 5385967 | 4 | 1.894819 |
| rs11657747    | NLRP1     | 17 | 5385967 | 6 | 6.366241 |
| rs11657747    | NLRP1     | 17 | 5385967 | 2 | 0.667788 |
| rs12942931    | NLRP1     | 17 | 5386038 | 4 | 1.711742 |
| SNP17-5402395 | NLRP1     | 17 | 5402395 | 6 | 5.642582 |
| rs2001363     | NLRP1     | 17 | 5403378 | 4 | 2.012209 |
| rs11651595    | NLRP1     | 17 | 5404003 | 4 | 1.785828 |
| rs11651595    | NLRP1     | 17 | 5404003 | 2 | 3.822973 |
| rs11651595    | NLRP1     | 17 | 5404003 | 6 | 0.319341 |
| rs884367      | NLRP1     | 17 | 5427888 | 8 | 6.813885 |
| rs884367      | NLRP1     | 17 | 5427888 | 4 | 0.549879 |
| rs884367      | NLRP1     | 17 | 5427888 | 3 | 1.50914  |
| rs2302836     | WSCD1     | 17 | 5932068 | 6 | 0.556366 |

|               |             |    |         |   |          |
|---------------|-------------|----|---------|---|----------|
| rs11868551    | WSCD1       | 17 | 5966196 | 1 | 2.681601 |
| rs3826521     | WSCD1       | 17 | 5966243 | 2 | 0.73741  |
| rs3826521     | WSCD1       | 17 | 5966243 | 1 | 0.101189 |
| rs3744725     | WSCD1       | 17 | 5966604 | 7 | 0.791883 |
| rs3744725     | WSCD1       | 17 | 5966604 | 5 | 0.795661 |
| rs3826520     | WSCD1       | 17 | 5967291 | 3 | 0.389138 |
| rs28493751    | PITPNM3     | 17 | 6382100 | 1 | 5.432992 |
| rs4796519     | KIAA0753    | 17 | 6452505 | 6 | 0.174573 |
| rs4796519     | KIAA0753    | 17 | 6452505 | 5 | 0.992554 |
| rs2304977     | KIAA0753    | 17 | 6454053 | 7 | 1.40652  |
| rs2304977     | KIAA0753    | 17 | 6454053 | 5 | 0.018152 |
| SNP17-6456174 | KIAA0753    | 17 | 6456174 | 1 | 4.406753 |
| rs9889363     | KIAA0753    | 17 | 6465022 | 6 | 4.668777 |
| rs9889363     | KIAA0753    | 17 | 6465022 | 5 | 0.362333 |
| rs9889363     | KIAA0753    | 17 | 6465022 | 7 | 0.546247 |
| rs2072149     | KIAA0753    | 17 | 6472372 | 5 | 0.434498 |
| rs2301873     | KIAA0753    | 17 | 6479079 | 5 | 0.111126 |
| rs2301873     | KIAA0753    | 17 | 6479079 | 6 | 0.692804 |
| rs4796532     | hCG_1985469 | 17 | 6497050 | 1 | 3.80512  |
| rs218689      | SLC13A5     | 17 | 6530074 | 2 | 3.817538 |
| rs218689      | SLC13A5     | 17 | 6530074 | 3 | 0.012151 |
| rs218689      | SLC13A5     | 17 | 6530074 | 4 | 0.920956 |
| SNP17-6538204 | SLC13A5     | 17 | 6538204 | 3 | 0.318895 |
| SNP17-6538204 | SLC13A5     | 17 | 6538204 | 4 | 2.155122 |
| SNP17-6539819 | SLC13A5     | 17 | 6539819 | 4 | 0.067815 |
| SNP17-6539819 | SLC13A5     | 17 | 6539819 | 3 | 0.527187 |
| rs4796555     | FBXO39      | 17 | 6623939 | 2 | 0.362149 |
| rs4796555     | FBXO39      | 17 | 6623939 | 3 | 0.527012 |
| rs4796555     | FBXO39      | 17 | 6623939 | 1 | 0.580726 |
| SNP17-6630888 | FBXO39      | 17 | 6630888 | 5 | 0.121975 |
| SNP17-6630888 | FBXO39      | 17 | 6630888 | 2 | 1.650504 |
| SNP17-6630888 | FBXO39      | 17 | 6630888 | 6 | 0.982635 |
| rs17804647    | TEKT1       | 17 | 6644795 | 5 | 1.236089 |
| rs3744395     | TEKT1       | 17 | 6656966 | 3 | 0.811295 |
| rs11571326    | LOC728478   | 17 | 6839621 | 2 | 2.695402 |
| rs312466      | LOC728478   | 17 | 6839945 | 5 | 1.097535 |
| rs312466      | LOC728478   | 17 | 6839945 | 1 | 2.373548 |
| rs312466      | LOC728478   | 17 | 6839945 | 6 | 1.264554 |
| rs312466      | LOC728478   | 17 | 6839945 | 4 | 0.057348 |
| rs1042356     | ALOX12      | 17 | 6843467 | 6 | 3.214092 |
| rs1042356     | ALOX12      | 17 | 6843467 | 8 | 0.776125 |
| rs1042356     | ALOX12      | 17 | 6843467 | 5 | 0.069041 |
| rs1042356     | ALOX12      | 17 | 6843467 | 4 | 4.825364 |
| rs1042356     | ALOX12      | 17 | 6843467 | 1 | 4.619121 |
| rs1126667     | ALOX12      | 17 | 6843484 | 8 | 1.495944 |
| rs1126667     | ALOX12      | 17 | 6843484 | 5 | 2.083181 |
| rs1126667     | ALOX12      | 17 | 6843484 | 1 | 6.116346 |

|               |           |    |         |   |          |
|---------------|-----------|----|---------|---|----------|
| rs1126667     | ALOX12    | 17 | 6843484 | 4 | 1.986702 |
| rs1126667     | ALOX12    | 17 | 6843484 | 6 | 1.544036 |
| rs434473      | ALOX12    | 17 | 6845658 | 1 | 3.817493 |
| rs434473      | ALOX12    | 17 | 6845658 | 5 | 0.727339 |
| rs434473      | ALOX12    | 17 | 6845658 | 4 | 7.840412 |
| rs434473      | ALOX12    | 17 | 6845658 | 6 | 0.066515 |
| rs2307214     | ALOX12    | 17 | 6850562 | 2 | 3.490302 |
| SNP17-6858574 | RNASEK    | 17 | 6858574 | 2 | 1.479992 |
| rs14309       | C17orf49  | 17 | 6859817 | 2 | 3.36847  |
| rs11653054    | ASGR2     | 17 | 6945651 | 1 | 2.829439 |
| rs12453853    | LOC728486 | 17 | 6985470 | 6 | 1.434248 |
| rs12453853    | LOC728486 | 17 | 6985470 | 2 | 3.808771 |
| rs12453853    | LOC728486 | 17 | 6985470 | 3 | 0.432821 |
| rs17203281    | DLG4      | 17 | 7040535 | 4 | 1.474199 |
| rs2017365     | DLG4      | 17 | 7063348 | 7 | 0.545909 |
| rs222836      | DVL2      | 17 | 7073886 | 4 | 0.751735 |
| rs222836      | DVL2      | 17 | 7073886 | 7 | 5.597602 |
| rs222836      | DVL2      | 17 | 7073886 | 8 | 0.117916 |
| rs8082645     | SLC2A4    | 17 | 7131159 | 1 | 0.950391 |
| rs11078672    | EIF5A     | 17 | 7155866 | 6 | 6.422132 |
| rs11078672    | EIF5A     | 17 | 7155866 | 5 | 2.951968 |
| rs11078672    | EIF5A     | 17 | 7155866 | 3 | 1.260196 |
| rs2270981     | GPS2      | 17 | 7157264 | 1 | 3.526497 |
| SNP17-7165645 | KIAA1787  | 17 | 7165645 | 3 | 0.487913 |
| SNP17-7171569 | KIAA1787  | 17 | 7171569 | 7 | 0.148549 |
| rs4796407     | CENTB1    | 17 | 7186095 | 1 | 0.010307 |
| rs4796407     | CENTB1    | 17 | 7186095 | 3 | 1.734584 |
| rs3809828     | CENTB1    | 17 | 7187575 | 7 | 1.177764 |
| rs35985803    | CENTB1    | 17 | 7195039 | 7 | 0.188595 |
| rs1554947     | TNK1      | 17 | 7226990 | 8 | 0.298135 |
| rs1554947     | TNK1      | 17 | 7226990 | 4 | 3.416161 |
| rs2075759     | TNK1      | 17 | 7233409 | 6 | 5.603767 |
| rs4613118     | PLSCR3    | 17 | 7238176 | 6 | 1.719412 |
| rs4613118     | PLSCR3    | 17 | 7238176 | 3 | 0.448385 |
| GA013897      | NLGN2     | 17 | 7260049 | 2 | 8.583724 |
| GA013901      | NLGN2     | 17 | 7263185 | 5 | 5.528653 |
| GA013901      | NLGN2     | 17 | 7263185 | 2 | 7.755016 |
| GA013901      | NLGN2     | 17 | 7263185 | 1 | 0.776709 |
| rs13290       | C17orf74  | 17 | 7270356 | 1 | 0.334864 |
| rs17856697    | CHRN1     | 17 | 7289349 | 7 | 0.022716 |
| rs2228129     | POLR2A    | 17 | 7343324 | 1 | 3.928391 |
| rs2228129     | POLR2A    | 17 | 7343324 | 5 | 0.594329 |
| rs2228132     | POLR2A    | 17 | 7352494 | 1 | 3.548093 |
| rs2228132     | POLR2A    | 17 | 7352494 | 5 | 7.01151  |
| rs1128963     | TNFSF12   | 17 | 7401409 | 2 | 0.207392 |
| rs1128963     | TNFSF12   | 17 | 7401409 | 4 | 0.242254 |
| rs1128963     | TNFSF12   | 17 | 7401409 | 6 | 0.200881 |

|               |         |    |         |   |          |
|---------------|---------|----|---------|---|----------|
| rs1128963     | TNFSF12 | 17 | 7401409 | 1 | 0.46282  |
| rs1128963     | TNFSF12 | 17 | 7401409 | 3 | 0.283647 |
| rs9901673     | CD68    | 17 | 7424825 | 5 | 0.914181 |
| rs17607       | CD68    | 17 | 7425506 | 2 | 4.740665 |
| rs17607       | CD68    | 17 | 7425506 | 3 | 0.396991 |
| rs858520      | SAT2    | 17 | 7470996 | 6 | 0.097885 |
| rs858520      | SAT2    | 17 | 7470996 | 3 | 0.478996 |
| rs858520      | SAT2    | 17 | 7470996 | 1 | 0.473356 |
| rs858520      | SAT2    | 17 | 7470996 | 4 | 4.557399 |
| rs858520      | SAT2    | 17 | 7470996 | 2 | 5.772322 |
| rs1642762     | ATP1B2  | 17 | 7495497 | 3 | 0.176999 |
| rs1642763     | ATP1B2  | 17 | 7498144 | 1 | 4.878292 |
| rs1642763     | ATP1B2  | 17 | 7498144 | 5 | 0.661724 |
| rs1642763     | ATP1B2  | 17 | 7498144 | 6 | 0.475681 |
| rs1641511     | ATP1B2  | 17 | 7500402 | 5 | 0.329697 |
| rs1641511     | ATP1B2  | 17 | 7500402 | 1 | 2.916023 |
| rs1641511     | ATP1B2  | 17 | 7500402 | 6 | 1.905931 |
| rs1050533     | ATP1B2  | 17 | 7501019 | 1 | 0.813891 |
| rs1050541     | ATP1B2  | 17 | 7501560 | 4 | 3.437815 |
| rs1050541     | ATP1B2  | 17 | 7501560 | 1 | 4.967848 |
| rs2287499     | WDR79   | 17 | 7532893 | 3 | 2.930518 |
| rs2287498     | WDR79   | 17 | 7533285 | 3 | 0.747329 |
| SNP17-7547447 | WDR79   | 17 | 7547447 | 6 | 6.658387 |
| SNP17-7547447 | WDR79   | 17 | 7547447 | 2 | 1.501041 |
| SNP17-7547447 | WDR79   | 17 | 7547447 | 1 | 0.741349 |
| SNP17-7547447 | WDR79   | 17 | 7547447 | 3 | 2.450323 |
| rs7141        | EFNB3   | 17 | 7555326 | 7 | 0.420014 |
| rs7141        | EFNB3   | 17 | 7555326 | 6 | 0.098243 |
| SNP17-7587121 | DNAH2   | 17 | 7587121 | 4 | 0.669727 |
| SNP17-7587121 | DNAH2   | 17 | 7587121 | 7 | 0.425301 |
| SNP17-7587121 | DNAH2   | 17 | 7587121 | 3 | 0.655292 |
| SNP17-7587121 | DNAH2   | 17 | 7587121 | 6 | 0.305218 |
| SNP17-7587121 | DNAH2   | 17 | 7587121 | 1 | 0.281065 |
| SNP17-7587121 | DNAH2   | 17 | 7587121 | 5 | 0.582453 |
| rs9909288     | DNAH2   | 17 | 7614653 | 7 | 2.850659 |
| rs9909288     | DNAH2   | 17 | 7614653 | 4 | 1.987927 |
| rs9909288     | DNAH2   | 17 | 7614653 | 3 | 3.315129 |
| rs9909288     | DNAH2   | 17 | 7614653 | 6 | 0.808661 |
| rs17806045    | DNAH2   | 17 | 7623330 | 7 | 1.103122 |
| rs17806045    | DNAH2   | 17 | 7623330 | 3 | 2.969042 |
| rs17806045    | DNAH2   | 17 | 7623330 | 6 | 0.932189 |
| rs11656500    | DNAH2   | 17 | 7638370 | 3 | 0.629994 |
| SNP17-7691863 | JMJD3   | 17 | 7691863 | 7 | 1.12846  |
| rs3744251     | LSMD1   | 17 | 7701708 | 4 | 0.466059 |
| rs12453250    | CYB5D1  | 17 | 7702237 | 2 | 5.244699 |
| rs12453250    | CYB5D1  | 17 | 7702237 | 7 | 0.393014 |
| rs3744252     | CYB5D1  | 17 | 7702651 | 4 | 3.963572 |

|               |          |    |         |   |          |
|---------------|----------|----|---------|---|----------|
| rs4435314     | CNTROB   | 17 | 7776384 | 5 | 0.656676 |
| rs4435314     | CNTROB   | 17 | 7776384 | 2 | 0.699836 |
| rs4435314     | CNTROB   | 17 | 7776384 | 8 | 0.953957 |
| rs11078719    | CNTROB   | 17 | 7783778 | 2 | 3.949267 |
| rs11078719    | CNTROB   | 17 | 7783778 | 8 | 0.279774 |
| rs11078719    | CNTROB   | 17 | 7783778 | 5 | 0.579864 |
| SNP17-7788562 | CNTROB   | 17 | 7788562 | 8 | 0.238946 |
| rs11650083    | CNTROB   | 17 | 7788680 | 2 | 1.716575 |
| rs11650083    | CNTROB   | 17 | 7788680 | 5 | 1.292324 |
| rs4462665     | CNTROB   | 17 | 7789812 | 5 | 0.036043 |
| rs4462665     | CNTROB   | 17 | 7789812 | 2 | 2.023919 |
| rs4462665     | CNTROB   | 17 | 7789812 | 8 | 3.821115 |
| rs7217194     | CNTROB   | 17 | 7793612 | 5 | 1.010733 |
| rs7217194     | CNTROB   | 17 | 7793612 | 8 | 2.519225 |
| rs34598902    | GUCY2D   | 17 | 7856637 | 7 | 0.65836  |
| rs2816        | GUCY2D   | 17 | 7864289 | 5 | 1.682125 |
| SNP17-7987497 | PER1     | 17 | 7987497 | 1 | 4.284901 |
| rs2253820     | PER1     | 17 | 7988894 | 1 | 6.275416 |
| rs2253820     | PER1     | 17 | 7988894 | 3 | 0.445818 |
| rs2241909     | AURKB    | 17 | 8049064 | 5 | 5.859133 |
| rs2241909     | AURKB    | 17 | 8049064 | 3 | 0.066157 |
| rs2241909     | AURKB    | 17 | 8049064 | 4 | 4.222552 |
| rs3826543     | C17orf68 | 17 | 8073488 | 5 | 0.299478 |
| rs3826543     | C17orf68 | 17 | 8073488 | 1 | 4.375406 |
| rs3027238     | C17orf68 | 17 | 8075786 | 1 | 1.287104 |
| rs3027238     | C17orf68 | 17 | 8075786 | 3 | 1.641197 |
| rs3027235     | C17orf68 | 17 | 8076171 | 3 | 0.356658 |
| rs4791641     | PFAS     | 17 | 8101874 | 6 | 0.792848 |
| rs4791641     | PFAS     | 17 | 8101874 | 4 | 1.804806 |
| rs4791641     | PFAS     | 17 | 8101874 | 7 | 0.83861  |
| SNP17-8107183 | PFAS     | 17 | 8107183 | 1 | 5.24023  |
| rs11078738    | PFAS     | 17 | 8108325 | 5 | 0.450364 |
| rs11078738    | PFAS     | 17 | 8108325 | 7 | 0.242557 |
| rs11078738    | PFAS     | 17 | 8108325 | 1 | 4.48727  |
| rs3744651     | ARHGEF15 | 17 | 8156259 | 5 | 0.450165 |
| rs3744651     | ARHGEF15 | 17 | 8156259 | 1 | 0.347796 |
| rs3744651     | ARHGEF15 | 17 | 8156259 | 3 | 0.574717 |
| rs3744647     | ARHGEF15 | 17 | 8165001 | 5 | 2.04937  |
| rs3744647     | ARHGEF15 | 17 | 8165001 | 1 | 3.159223 |
| rs1045172     | ARHGEF15 | 17 | 8166493 | 3 | 0.976147 |
| rs12601097    | ODF4     | 17 | 8184386 | 5 | 0.404967 |
| rs2430949     | KRBA2    | 17 | 8213492 | 1 | 3.556054 |
| rs10520       | MYH10    | 17 | 8318991 | 5 | 1.274332 |
| rs9915880     | PIK3R5   | 17 | 8732728 | 1 | 0.333699 |
| rs9915880     | PIK3R5   | 17 | 8732728 | 5 | 1.140417 |
| rs9915880     | PIK3R5   | 17 | 8732728 | 6 | 0.055492 |
| rs9915880     | PIK3R5   | 17 | 8732728 | 3 | 1.087705 |



|            |       |    |         |   |          |
|------------|-------|----|---------|---|----------|
| rs8974     | STX8  | 17 | 9094586 | 1 | 3.578093 |
| rs8974     | STX8  | 17 | 9094586 | 4 | 2.843226 |
| rs8974     | STX8  | 17 | 9094586 | 5 | 0.346443 |
| rs1133295  | STX8  | 17 | 9412436 | 6 | 0.510716 |
| rs1133295  | STX8  | 17 | 9412436 | 4 | 0.138977 |
| rs6503235  | WDR16 | 17 | 9456502 | 3 | 1.153223 |
| rs274899   | WDR16 | 17 | 9487276 | 4 | 0.198027 |
| rs274899   | WDR16 | 17 | 9487276 | 3 | 0.545768 |
| rs274899   | WDR16 | 17 | 9487276 | 1 | 5.463105 |
| rs16958933 | RCVRN | 17 | 9742095 | 2 | 1.761636 |
| rs4668     | GAS7  | 17 | 9755148 | 1 | 1.177875 |
| rs4668     | GAS7  | 17 | 9755148 | 4 | 5.858817 |
| rs4668     | GAS7  | 17 | 9755148 | 6 | 2.856062 |
| rs4668     | GAS7  | 17 | 9755148 | 2 | 6.199298 |
| rs4668     | GAS7  | 17 | 9755148 | 8 | 0.583151 |
| rs1047334  | GAS7  | 17 | 9755912 | 4 | 0.911468 |
| rs1047334  | GAS7  | 17 | 9755912 | 6 | 1.361629 |
| rs1047334  | GAS7  | 17 | 9755912 | 5 | 0.865675 |
| rs1047339  | GAS7  | 17 | 9756136 | 6 | 0.385051 |
| rs1047339  | GAS7  | 17 | 9756136 | 5 | 3.492847 |
| rs1047339  | GAS7  | 17 | 9756136 | 4 | 0.835384 |
| rs1047339  | GAS7  | 17 | 9756136 | 1 | 1.538815 |
| rs1129463  | GAS7  | 17 | 9756951 | 4 | 0.498485 |
| rs1129463  | GAS7  | 17 | 9756951 | 2 | 1.023656 |
| rs1129463  | GAS7  | 17 | 9756951 | 1 | 2.548273 |
| rs1129463  | GAS7  | 17 | 9756951 | 5 | 0.315861 |
| rs15814    | GAS7  | 17 | 9757115 | 1 | 0.337083 |
| rs15814    | GAS7  | 17 | 9757115 | 2 | 0.689148 |
| rs15814    | GAS7  | 17 | 9757115 | 6 | 1.306241 |
| rs15814    | GAS7  | 17 | 9757115 | 4 | 0.069226 |
| rs1129464  | GAS7  | 17 | 9757177 | 2 | 0.703563 |
| rs1129464  | GAS7  | 17 | 9757177 | 4 | 0.622336 |
| rs1129464  | GAS7  | 17 | 9757177 | 5 | 1.40959  |
| rs1129464  | GAS7  | 17 | 9757177 | 1 | 0.138877 |
| rs3177567  | GAS7  | 17 | 9757356 | 1 | 0.772458 |
| rs3177567  | GAS7  | 17 | 9757356 | 4 | 1.305396 |
| rs3177567  | GAS7  | 17 | 9757356 | 6 | 4.012859 |
| rs3177567  | GAS7  | 17 | 9757356 | 5 | 2.075477 |
| rs3177567  | GAS7  | 17 | 9757356 | 2 | 4.285282 |
| rs2270121  | GAS7  | 17 | 9757396 | 5 | 0.008061 |
| rs2270121  | GAS7  | 17 | 9757396 | 6 | 0.491468 |
| rs2270121  | GAS7  | 17 | 9757396 | 2 | 4.62992  |
| rs2270121  | GAS7  | 17 | 9757396 | 1 | 1.365301 |
| rs2270121  | GAS7  | 17 | 9757396 | 4 | 1.425397 |
| rs1047365  | GAS7  | 17 | 9759695 | 6 | 5.267177 |
| rs1047365  | GAS7  | 17 | 9759695 | 4 | 6.626852 |
| rs1047365  | GAS7  | 17 | 9759695 | 1 | 1.164017 |

|                |          |    |          |   |          |
|----------------|----------|----|----------|---|----------|
| rs1047365      | GAS7     | 17 | 9759695  | 2 | 3.813767 |
| rs1047365      | GAS7     | 17 | 9759695  | 8 | 0.23211  |
| rs1047367      | GAS7     | 17 | 9759851  | 5 | 6.743519 |
| rs1047367      | GAS7     | 17 | 9759851  | 1 | 0.839515 |
| rs1047367      | GAS7     | 17 | 9759851  | 2 | 2.51788  |
| rs1047367      | GAS7     | 17 | 9759851  | 4 | 1.134109 |
| rs1047367      | GAS7     | 17 | 9759851  | 8 | 0.219787 |
| rs1047367      | GAS7     | 17 | 9759851  | 6 | 6.321355 |
| rs2240739      | GAS7     | 17 | 9760866  | 8 | 1.378142 |
| rs2240739      | GAS7     | 17 | 9760866  | 1 | 0.186557 |
| rs2240739      | GAS7     | 17 | 9760866  | 6 | 0.944641 |
| rs2240739      | GAS7     | 17 | 9760866  | 4 | 1.420248 |
| rs2286532      | GAS7     | 17 | 9761003  | 1 | 1.301936 |
| rs2286532      | GAS7     | 17 | 9761003  | 6 | 0.997103 |
| rs2286532      | GAS7     | 17 | 9761003  | 8 | 3.884464 |
| rs2286532      | GAS7     | 17 | 9761003  | 2 | 6.382789 |
| rs2286532      | GAS7     | 17 | 9761003  | 4 | 2.228132 |
| rs3744550      | MYH13    | 17 | 10147320 | 5 | 0.521483 |
| rs2074877      | MYH13    | 17 | 10164439 | 5 | 0.037725 |
| rs3760423      | MYH13    | 17 | 10184442 | 5 | 1.288333 |
| rs3744551      | MYH8     | 17 | 10234420 | 4 | 1.889915 |
| rs2285479      | MYH3     | 17 | 10476743 | 4 | 0.233912 |
| rs2285479      | MYH3     | 17 | 10476743 | 3 | 0.730419 |
| rs2285479      | MYH3     | 17 | 10476743 | 1 | 0.523238 |
| rs2285477      | MYH3     | 17 | 10482240 | 4 | 0.816387 |
| rs2285477      | MYH3     | 17 | 10482240 | 2 | 0.857778 |
| rs2285477      | MYH3     | 17 | 10482240 | 1 | 0.706804 |
| rs2285477      | MYH3     | 17 | 10482240 | 3 | 1.454675 |
| rs201626       | MYH3     | 17 | 10482466 | 3 | 0.908193 |
| rs201626       | MYH3     | 17 | 10482466 | 1 | 2.951925 |
| rs2285475      | MYH3     | 17 | 10483196 | 1 | 0.613214 |
| rs2285475      | MYH3     | 17 | 10483196 | 4 | 0.278595 |
| rs2285475      | MYH3     | 17 | 10483196 | 3 | 0.843724 |
| rs2285474      | MYH3     | 17 | 10483490 | 3 | 0.363988 |
| rs2285474      | MYH3     | 17 | 10483490 | 4 | 1.818937 |
| rs2285474      | MYH3     | 17 | 10483490 | 1 | 1.233249 |
| rs2285472      | MYH3     | 17 | 10483611 | 4 | 0.296849 |
| rs2285472      | MYH3     | 17 | 10483611 | 2 | 0.161394 |
| rs2285472      | MYH3     | 17 | 10483611 | 3 | 0.239064 |
| rs2285472      | MYH3     | 17 | 10483611 | 1 | 0.406215 |
| rs876657       | MYH3     | 17 | 10485141 | 4 | 1.387284 |
| rs876657       | MYH3     | 17 | 10485141 | 1 | 0.802891 |
| rs876657       | MYH3     | 17 | 10485141 | 3 | 1.284751 |
| rs876657       | MYH3     | 17 | 10485141 | 2 | 1.357393 |
| SNP17-10549243 | C17orf48 | 17 | 10549243 | 6 | 4.52497  |
| rs445928       | C17orf48 | 17 | 10555398 | 5 | 0.024968 |
| rs445928       | C17orf48 | 17 | 10555398 | 4 | 1.122489 |

|            |           |    |          |   |          |
|------------|-----------|----|----------|---|----------|
| rs445928   | C17orf48  | 17 | 10555398 | 7 | 0.589266 |
| rs445928   | C17orf48  | 17 | 10555398 | 6 | 0.726481 |
| rs379403   | C17orf48  | 17 | 10555592 | 7 | 1.004381 |
| rs379403   | C17orf48  | 17 | 10555592 | 6 | 4.194903 |
| rs379403   | C17orf48  | 17 | 10555592 | 5 | 0.243131 |
| rs379403   | C17orf48  | 17 | 10555592 | 4 | 0.744112 |
| rs387022   | C17orf48  | 17 | 10555594 | 7 | 1.100736 |
| rs387022   | C17orf48  | 17 | 10555594 | 4 | 0.434649 |
| rs387022   | C17orf48  | 17 | 10555594 | 5 | 0.635909 |
| rs617655   | LOC388335 | 17 | 10557491 | 5 | 0.76274  |
| rs617655   | LOC388335 | 17 | 10557491 | 7 | 2.53147  |
| rs617655   | LOC388335 | 17 | 10557491 | 6 | 3.327547 |
| rs617655   | LOC388335 | 17 | 10557491 | 4 | 1.278342 |
| rs411511   | LOC388335 | 17 | 10557959 | 7 | 0.460158 |
| rs411511   | LOC388335 | 17 | 10557959 | 4 | 4.724356 |
| rs411511   | LOC388335 | 17 | 10557959 | 6 | 1.941681 |
| rs411511   | LOC388335 | 17 | 10557959 | 5 | 1.173631 |
| rs375437   | LOC388335 | 17 | 10558006 | 7 | 1.841767 |
| rs375437   | LOC388335 | 17 | 10558006 | 6 | 0.725545 |
| rs375437   | LOC388335 | 17 | 10558006 | 5 | 0.635706 |
| rs375437   | LOC388335 | 17 | 10558006 | 4 | 1.711897 |
| rs387142   | LOC388335 | 17 | 10558039 | 6 | 0.476282 |
| rs387142   | LOC388335 | 17 | 10558039 | 5 | 2.021597 |
| rs387142   | LOC388335 | 17 | 10558039 | 7 | 0.287575 |
| rs387142   | LOC388335 | 17 | 10558039 | 4 | 0.410601 |
| rs435382   | LOC388335 | 17 | 10558389 | 4 | 1.316816 |
| rs435382   | LOC388335 | 17 | 10558389 | 5 | 0.730553 |
| rs435382   | LOC388335 | 17 | 10558389 | 7 | 1.36497  |
| rs374034   | LOC388335 | 17 | 10558455 | 7 | 2.796561 |
| rs374034   | LOC388335 | 17 | 10558455 | 4 | 1.408532 |
| rs440655   | LOC388335 | 17 | 10558528 | 4 | 2.354906 |
| rs440655   | LOC388335 | 17 | 10558528 | 6 | 2.355877 |
| rs440655   | LOC388335 | 17 | 10558528 | 5 | 1.510189 |
| rs202311   | LOC388335 | 17 | 10574083 | 4 | 1.876169 |
| rs202311   | LOC388335 | 17 | 10574083 | 5 | 2.59527  |
| rs202311   | LOC388335 | 17 | 10574083 | 6 | 2.558365 |
| rs202311   | LOC388335 | 17 | 10574083 | 7 | 1.948766 |
| rs11078022 | DNAH9     | 17 | 11452182 | 3 | 0.472884 |
| rs12449553 | DNAH9     | 17 | 11698281 | 1 | 1.045156 |
| rs3760435  | DNAH9     | 17 | 11727016 | 5 | 1.399773 |
| rs8070256  | DNAH9     | 17 | 11727676 | 4 | 0.369507 |
| rs8070256  | DNAH9     | 17 | 11727676 | 2 | 0.656778 |
| rs8070256  | DNAH9     | 17 | 11727676 | 5 | 0.553491 |
| rs2286303  | DNAH9     | 17 | 11774012 | 5 | 0.761874 |
| rs2072254  | RICH2     | 17 | 12793184 | 7 | 2.599478 |
| rs3213687  | RICH2     | 17 | 12802895 | 6 | 5.215968 |
| rs3213687  | RICH2     | 17 | 12802895 | 7 | 0.25731  |

|                |           |    |          |   |          |
|----------------|-----------|----|----------|---|----------|
| rs6949         | ELAC2     | 17 | 12836580 | 3 | 0.04153  |
| rs17552022     | ELAC2     | 17 | 12839020 | 6 | 0.828093 |
| rs34342426     | COX10     | 17 | 13920783 | 3 | 0.56973  |
| rs3785655      | HS3ST3B1  | 17 | 14189892 | 1 | 1.315689 |
| rs3785655      | HS3ST3B1  | 17 | 14189892 | 3 | 0.705633 |
| rs3785655      | HS3ST3B1  | 17 | 14189892 | 5 | 1.274345 |
| rs3785655      | HS3ST3B1  | 17 | 14189892 | 2 | 2.309484 |
| rs11653482     | FLJ45831  | 17 | 14611752 | 5 | 0.080924 |
| rs6502391      | FLJ45831  | 17 | 14613416 | 4 | 0.535953 |
| rs6502391      | FLJ45831  | 17 | 14613416 | 7 | 0.571399 |
| rs6502391      | FLJ45831  | 17 | 14613416 | 1 | 0.229064 |
| rs1860379      | FLJ45831  | 17 | 14613785 | 1 | 0.161217 |
| rs1860379      | FLJ45831  | 17 | 14613785 | 6 | 0.61834  |
| rs1860379      | FLJ45831  | 17 | 14613785 | 2 | 1.100237 |
| rs11654383     | PMP22     | 17 | 15073839 | 1 | 4.960111 |
| rs230898       | TEKT3     | 17 | 15158162 | 2 | 5.316911 |
| rs230898       | TEKT3     | 17 | 15158162 | 3 | 0.349839 |
| SNP17-15437452 | CDRT1     | 17 | 15437452 | 6 | 1.195611 |
| rs9905520      | ZNF286A   | 17 | 15561942 | 3 | 1.829656 |
| rs9905520      | ZNF286A   | 17 | 15561942 | 8 | 1.917656 |
| rs9905520      | ZNF286A   | 17 | 15561942 | 7 | 0.734073 |
| rs9905520      | ZNF286A   | 17 | 15561942 | 5 | 0.559843 |
| rs11650318     | MGC51025  | 17 | 15585231 | 7 | 0.544758 |
| rs2240593      | MGC51025  | 17 | 15588448 | 7 | 1.40348  |
| rs2240593      | MGC51025  | 17 | 15588448 | 1 | 2.95145  |
| rs2240593      | MGC51025  | 17 | 15588448 | 5 | 0.213306 |
| rs3813769      | TRPV2     | 17 | 16259657 | 7 | 0.686109 |
| rs8121         | TRPV2     | 17 | 16266693 | 7 | 1.31902  |
| rs1129235      | TRPV2     | 17 | 16266730 | 1 | 2.359635 |
| rs1129235      | TRPV2     | 17 | 16266730 | 7 | 0.585945 |
| rs4570894      | C17orf76  | 17 | 16286906 | 3 | 0.70261  |
| rs1141283      | C17orf76  | 17 | 16287482 | 3 | 0.966373 |
| rs1141283      | C17orf76  | 17 | 16287482 | 5 | 0.57192  |
| rs1141283      | C17orf76  | 17 | 16287482 | 8 | 0.543493 |
| rs4792745      | C17orf76  | 17 | 16287657 | 1 | 4.496996 |
| rs4792745      | C17orf76  | 17 | 16287657 | 8 | 0.268456 |
| rs4792745      | C17orf76  | 17 | 16287657 | 4 | 1.233073 |
| rs4792745      | C17orf76  | 17 | 16287657 | 7 | 2.717383 |
| rs4792745      | C17orf76  | 17 | 16287657 | 6 | 4.370714 |
| rs10491106     | ZNF287    | 17 | 16395636 | 3 | 1.045249 |
| rs3813762      | LOC644422 | 17 | 16461809 | 6 | 3.490971 |
| rs9906261      | ZNF624    | 17 | 16465654 | 6 | 4.784702 |
| rs8065506      | ZNF624    | 17 | 16468520 | 6 | 0.041096 |
| rs8065506      | ZNF624    | 17 | 16468520 | 5 | 5.559606 |
| rs11078355     | TNFRSF13B | 17 | 16783637 | 4 | 0.025091 |
| rs14003        | LOC201164 | 17 | 17045439 | 3 | 0.928996 |
| rs14003        | LOC201164 | 17 | 17045439 | 7 | 2.824822 |

|                |           |    |          |   |          |
|----------------|-----------|----|----------|---|----------|
| rs14003        | LOC201164 | 17 | 17045439 | 1 | 2.141698 |
| rs9908205      | LOC201164 | 17 | 17046340 | 3 | 0.462877 |
| rs9908205      | LOC201164 | 17 | 17046340 | 2 | 0.066702 |
| rs9908205      | LOC201164 | 17 | 17046340 | 1 | 0.216452 |
| rs9908205      | LOC201164 | 17 | 17046340 | 7 | 3.530674 |
| rs4985749      | LOC201164 | 17 | 17046407 | 7 | 1.248636 |
| rs4985749      | LOC201164 | 17 | 17046407 | 1 | 5.295955 |
| rs4985749      | LOC201164 | 17 | 17046407 | 3 | 0.037199 |
| rs3803761      | FLCN      | 17 | 17057137 | 7 | 2.760759 |
| rs3803761      | FLCN      | 17 | 17057137 | 1 | 4.892584 |
| rs1736209      | FLCN      | 17 | 17081210 | 1 | 0.318681 |
| rs1736209      | FLCN      | 17 | 17081210 | 5 | 0.85098  |
| rs2240876      | NT5M      | 17 | 17190884 | 3 | 1.638443 |
| rs35590625     | LOC644909 | 17 | 17267088 | 3 | 0.179836 |
| rs35590625     | LOC644909 | 17 | 17267088 | 5 | 0.441444 |
| rs35590625     | LOC644909 | 17 | 17267088 | 6 | 0.763501 |
| rs1242489      | MED9      | 17 | 17335336 | 5 | 1.588335 |
| rs1242489      | MED9      | 17 | 17335336 | 1 | 0.812951 |
| rs1242489      | MED9      | 17 | 17335336 | 8 | 1.960976 |
| rs1242489      | MED9      | 17 | 17335336 | 3 | 1.252666 |
| rs711352       | RASD1     | 17 | 17338543 | 2 | 1.730709 |
| rs711352       | RASD1     | 17 | 17338543 | 4 | 0.054151 |
| SNP17-17637256 | RAI1      | 17 | 17637256 | 7 | 8.627    |
| SNP17-17637256 | RAI1      | 17 | 17637256 | 4 | 5.408154 |
| SNP17-17637256 | RAI1      | 17 | 17637256 | 6 | 6.72255  |
| rs4584886      | LRRC48    | 17 | 17836930 | 3 | 0.741307 |
| rs4584886      | LRRC48    | 17 | 17836930 | 4 | 0.555    |
| rs4584886      | LRRC48    | 17 | 17836930 | 6 | 1.034499 |
| SNP17-17848493 | LRRC48    | 17 | 17848493 | 1 | 5.372146 |
| rs33997182     | ATPAF2    | 17 | 17862720 | 1 | 4.223751 |
| rs2280777      | MYO15A    | 17 | 17982232 | 2 | 0.642794 |
| rs2280777      | MYO15A    | 17 | 17982232 | 7 | 0.119184 |
| rs2280777      | MYO15A    | 17 | 17982232 | 1 | 0.188734 |
| rs2280777      | MYO15A    | 17 | 17982232 | 3 | 0.287272 |
| rs854777       | MYO15A    | 17 | 17987623 | 1 | 2.299532 |
| rs854777       | MYO15A    | 17 | 17987623 | 2 | 2.095009 |
| rs854777       | MYO15A    | 17 | 17987623 | 8 | 2.191937 |
| rs2272571      | MYO15A    | 17 | 17987914 | 5 | 1.705614 |
| rs854772       | MYO15A    | 17 | 17995954 | 1 | 1.368104 |
| rs854772       | MYO15A    | 17 | 17995954 | 2 | 2.227953 |
| rs854772       | MYO15A    | 17 | 17995954 | 5 | 1.397557 |
| rs854772       | MYO15A    | 17 | 17995954 | 6 | 1.294887 |
| rs854772       | MYO15A    | 17 | 17995954 | 8 | 1.854064 |
| rs854772       | MYO15A    | 17 | 17995954 | 7 | 1.924305 |
| rs712270       | MYO15A    | 17 | 17997892 | 3 | 1.810789 |
| rs712272       | MYO15A    | 17 | 17999246 | 1 | 0.286778 |
| rs8077577      | MYO15A    | 17 | 18005455 | 3 | 0.472265 |

|                |           |    |          |   |          |
|----------------|-----------|----|----------|---|----------|
| rs8077577      | MYO15A    | 17 | 18005455 | 8 | 0.240363 |
| rs854800       | MYO15A    | 17 | 18017900 | 1 | 1.850013 |
| rs854800       | MYO15A    | 17 | 18017900 | 4 | 0.813754 |
| rs854800       | MYO15A    | 17 | 18017900 | 8 | 2.626163 |
| rs13284        | ALKBH5    | 17 | 18052855 | 3 | 1.293737 |
| rs13284        | ALKBH5    | 17 | 18052855 | 8 | 0.022908 |
| rs3088233      | ALKBH5    | 17 | 18053400 | 3 | 0.799927 |
| rs3088233      | ALKBH5    | 17 | 18053400 | 8 | 4.617925 |
| rs2605143      | SMCR7     | 17 | 18108230 | 8 | 0.471365 |
| SNP17-18108409 | SMCR7     | 17 | 18108409 | 5 | 0.687146 |
| rs3783         | SHMT1     | 17 | 18172742 | 2 | 5.051488 |
| rs3783         | SHMT1     | 17 | 18172742 | 3 | 0.121022 |
| rs3783         | SHMT1     | 17 | 18172742 | 1 | 0.329302 |
| rs2461838      | LOC645023 | 17 | 18205989 | 3 | 0.787157 |
| rs2461838      | LOC645023 | 17 | 18205989 | 1 | 0.060163 |
| rs2461838      | LOC645023 | 17 | 18205989 | 2 | 0.704511 |
| rs4924765      | LOC729288 | 17 | 18525961 | 2 | 0.404681 |
| rs4924765      | LOC729288 | 17 | 18525961 | 1 | 3.580106 |
| rs4924765      | LOC729288 | 17 | 18525961 | 8 | 1.19452  |
| rs4924765      | LOC729288 | 17 | 18525961 | 3 | 2.721359 |
| SNP17-18593795 | FBXW10    | 17 | 18593795 | 5 | 4.534826 |
| SNP17-18593795 | FBXW10    | 17 | 18593795 | 3 | 4.528796 |
| SNP17-18593795 | FBXW10    | 17 | 18593795 | 8 | 3.769953 |
| SNP17-18593795 | FBXW10    | 17 | 18593795 | 2 | 4.584997 |
| rs4393623      | PRPSAP2   | 17 | 18716625 | 3 | 0.703528 |
| rs4393623      | PRPSAP2   | 17 | 18716625 | 7 | 0.11198  |
| rs4393623      | PRPSAP2   | 17 | 18716625 | 5 | 0.415369 |
| rs1044787      | PRPSAP2   | 17 | 18775277 | 4 | 0.73125  |
| rs1044787      | PRPSAP2   | 17 | 18775277 | 7 | 0.896442 |
| rs2472717      | FAM83G    | 17 | 18820374 | 1 | 1.767777 |
| rs2472717      | FAM83G    | 17 | 18820374 | 5 | 0.673652 |
| rs2472717      | FAM83G    | 17 | 18820374 | 6 | 0.835266 |
| rs2472717      | FAM83G    | 17 | 18820374 | 4 | 1.481974 |
| rs2472717      | FAM83G    | 17 | 18820374 | 3 | 0.979671 |
| rs2472717      | FAM83G    | 17 | 18820374 | 7 | 1.571285 |
| rs2472715      | SLC5A10   | 17 | 18820993 | 6 | 1.323808 |
| rs2472715      | SLC5A10   | 17 | 18820993 | 5 | 0.818632 |
| rs2472715      | SLC5A10   | 17 | 18820993 | 3 | 1.741217 |
| rs2472715      | SLC5A10   | 17 | 18820993 | 1 | 2.231201 |
| rs2469860      | FAM83G    | 17 | 18821386 | 3 | 0.383315 |
| rs2469860      | FAM83G    | 17 | 18821386 | 8 | 0.411919 |
| rs2469860      | FAM83G    | 17 | 18821386 | 5 | 0.442991 |
| rs2469860      | FAM83G    | 17 | 18821386 | 7 | 0.289399 |
| rs2469860      | FAM83G    | 17 | 18821386 | 1 | 0.576016 |
| rs2074271      | FAM83G    | 17 | 18822939 | 4 | 1.505361 |
| rs1624825      | SLC5A10   | 17 | 18864543 | 3 | 0.058281 |
| rs2233072      | MAPK7     | 17 | 19222421 | 6 | 1.677012 |

|            |           |    |          |   |          |
|------------|-----------|----|----------|---|----------|
| rs2233072  | MAPK7     | 17 | 19222421 | 2 | 4.72699  |
| rs1042183  | ALDH3A1   | 17 | 19581913 | 8 | 0.319961 |
| rs1042183  | ALDH3A1   | 17 | 19581913 | 4 | 0.474427 |
| rs1042183  | ALDH3A1   | 17 | 19581913 | 6 | 1.279428 |
| rs1042183  | ALDH3A1   | 17 | 19581913 | 2 | 1.88078  |
| rs2228100  | ALDH3A1   | 17 | 19583544 | 3 | 0.543194 |
| rs2228100  | ALDH3A1   | 17 | 19583544 | 1 | 5.565546 |
| rs2072327  | LOC441784 | 17 | 19592074 | 1 | 0.313941 |
| rs9898251  | LOC441784 | 17 | 19599891 | 7 | 4.752755 |
| rs9898251  | LOC441784 | 17 | 19599891 | 6 | 4.202442 |
| rs9898251  | LOC441784 | 17 | 19599891 | 5 | 4.509213 |
| rs115326   | ULK2      | 17 | 19618341 | 1 | 6.91526  |
| rs115326   | ULK2      | 17 | 19618341 | 6 | 7.209334 |
| rs150122   | ULK2      | 17 | 19654332 | 1 | 1.815274 |
| rs157397   | ULK2      | 17 | 19670087 | 1 | 1.035641 |
| rs2108978  | AKAP10    | 17 | 19802050 | 6 | 2.7486   |
| rs2108978  | AKAP10    | 17 | 19802050 | 7 | 2.236842 |
| rs3764436  | SPECC1    | 17 | 19954394 | 5 | 0.040403 |
| rs3764436  | SPECC1    | 17 | 19954394 | 1 | 3.882634 |
| rs9902683  | LOC729404 | 17 | 19956020 | 1 | 4.85105  |
| rs9902683  | LOC729404 | 17 | 19956020 | 5 | 1.074538 |
| rs2703806  | SPECC1    | 17 | 20048831 | 7 | 0.091968 |
| rs2703806  | SPECC1    | 17 | 20048831 | 4 | 7.122042 |
| rs2703806  | SPECC1    | 17 | 20048831 | 6 | 0.340473 |
| rs2703806  | SPECC1    | 17 | 20048831 | 2 | 7.319666 |
| rs2703806  | SPECC1    | 17 | 20048831 | 1 | 0.268153 |
| rs1815569  | LOC729334 | 17 | 20581369 | 6 | 2.701084 |
| rs8068101  | LOC645294 | 17 | 20598390 | 1 | 7.105595 |
| rs8068101  | LOC645294 | 17 | 20598390 | 8 | 3.778179 |
| rs8068101  | LOC645294 | 17 | 20598390 | 3 | 6.448637 |
| rs8068101  | LOC645294 | 17 | 20598390 | 7 | 3.933955 |
| rs8068101  | LOC645294 | 17 | 20598390 | 6 | 3.907262 |
| rs8073465  | MGC87631  | 17 | 20739584 | 5 | 1.566487 |
| rs11204329 | USP22     | 17 | 20843295 | 6 | 0.805647 |
| rs11204329 | USP22     | 17 | 20843295 | 2 | 4.005354 |
| rs11204329 | USP22     | 17 | 20843295 | 7 | 0.336517 |
| rs11541314 | USP22     | 17 | 20846737 | 6 | 0.074747 |
| rs11541314 | USP22     | 17 | 20846737 | 1 | 4.750713 |
| rs11541311 | USP22     | 17 | 20851796 | 6 | 3.955504 |
| rs11541311 | USP22     | 17 | 20851796 | 8 | 5.874126 |
| rs11541311 | USP22     | 17 | 20851796 | 7 | 2.430861 |
| rs12449311 | MGC33894  | 17 | 21088113 | 1 | 0.02607  |
| rs6587170  | LOC645479 | 17 | 21437192 | 5 | 0.785171 |
| rs35094692 | LOC729550 | 17 | 22777629 | 7 | 0.199331 |
| rs35094692 | LOC729550 | 17 | 22777629 | 2 | 1.483224 |
| rs35094692 | LOC729550 | 17 | 22777629 | 1 | 1.701236 |
| rs2945379  | LOC729538 | 17 | 22877777 | 2 | 1.474269 |

|                |           |    |          |   |          |
|----------------|-----------|----|----------|---|----------|
| rs2945379      | LOC729538 | 17 | 22877777 | 1 | 0.400076 |
| rs2945379      | LOC729538 | 17 | 22877777 | 4 | 5.065828 |
| rs2945379      | LOC729538 | 17 | 22877777 | 7 | 0.214793 |
| rs2945379      | LOC729538 | 17 | 22877777 | 6 | 0.472241 |
| rs7222355      | LOC729538 | 17 | 22878315 | 1 | 0.509851 |
| rs7222355      | LOC729538 | 17 | 22878315 | 7 | 0.962903 |
| rs7222355      | LOC729538 | 17 | 22878315 | 6 | 0.408751 |
| rs7222355      | LOC729538 | 17 | 22878315 | 4 | 3.192188 |
| rs7222355      | LOC729538 | 17 | 22878315 | 2 | 1.186336 |
| rs3751093      | LGALS9    | 17 | 22982431 | 3 | 0.649663 |
| rs3751093      | LGALS9    | 17 | 22982431 | 5 | 0.82744  |
| rs3751093      | LGALS9    | 17 | 22982431 | 6 | 0.56789  |
| rs2297518      | NOS2A     | 17 | 23120724 | 3 | 1.658799 |
| rs2297518      | NOS2A     | 17 | 23120724 | 4 | 1.906813 |
| rs2297518      | NOS2A     | 17 | 23120724 | 5 | 2.640682 |
| rs35668234     | NLK       | 17 | 23393462 | 3 | 0.380039 |
| rs9897022      | PYY2      | 17 | 23578902 | 5 | 0.131958 |
| rs9897022      | PYY2      | 17 | 23578902 | 6 | 0.156049 |
| rs9897022      | PYY2      | 17 | 23578902 | 4 | 1.306741 |
| rs3093704      | TNFAIP1   | 17 | 23697443 | 5 | 0.037231 |
| rs3093704      | TNFAIP1   | 17 | 23697443 | 7 | 0.774445 |
| rs2277667      | SEBOX     | 17 | 23716043 | 7 | 0.405781 |
| rs2277667      | SEBOX     | 17 | 23716043 | 5 | 0.575074 |
| rs2227728      | VTN       | 17 | 23718610 | 5 | 0.983473 |
| SNP17-23718988 | VTN       | 17 | 23718988 | 3 | 1.065907 |
| SNP17-23718988 | VTN       | 17 | 23718988 | 1 | 0.196209 |
| rs739439       | SARM1     | 17 | 23747949 | 8 | 0.21047  |
| rs739439       | SARM1     | 17 | 23747949 | 4 | 3.138601 |
| rs739439       | SARM1     | 17 | 23747949 | 3 | 0.729623 |
| rs739439       | SARM1     | 17 | 23747949 | 1 | 4.646869 |
| rs739439       | SARM1     | 17 | 23747949 | 5 | 5.996466 |
| rs739439       | SARM1     | 17 | 23747949 | 7 | 1.763466 |
| rs11568466     | SLC13A2   | 17 | 23841664 | 1 | 0.806918 |
| rs12449554     | FOXN1     | 17 | 23881915 | 1 | 2.353045 |
| rs12051648     | SUPT6H    | 17 | 24033876 | 8 | 3.473009 |
| rs12051648     | SUPT6H    | 17 | 24033876 | 2 | 2.485201 |
| rs12051648     | SUPT6H    | 17 | 24033876 | 4 | 1.027961 |
| rs12051648     | SUPT6H    | 17 | 24033876 | 5 | 3.698298 |
| rs12051648     | SUPT6H    | 17 | 24033876 | 7 | 1.352075 |
| GA014112       | SUPT6H    | 17 | 24038523 | 5 | 0.70631  |
| rs3809797      | NEK8      | 17 | 24089338 | 5 | 1.453323 |
| rs2242345      | ERAL1     | 17 | 24209953 | 5 | 0.313036 |
| rs2242345      | ERAL1     | 17 | 24209953 | 2 | 2.495092 |
| rs2242345      | ERAL1     | 17 | 24209953 | 7 | 0.454147 |
| rs2242345      | ERAL1     | 17 | 24209953 | 8 | 0.830714 |
| rs4795475      | PHF12     | 17 | 24263502 | 7 | 0.383317 |
| rs12941884     | SEZ6      | 17 | 24308569 | 7 | 0.613418 |



|            |           |    |          |   |          |
|------------|-----------|----|----------|---|----------|
| rs1976165  | SEZ6      | 17 | 24310977 | 7 | 1.849013 |
| rs1976165  | SEZ6      | 17 | 24310977 | 3 | 0.596044 |
| rs2320786  | MYO18A    | 17 | 24446179 | 5 | 0.106473 |
| rs2320786  | MYO18A    | 17 | 24446179 | 3 | 0.00489  |
| rs12601535 | MYO18A    | 17 | 24465203 | 5 | 0.298527 |
| rs12601535 | MYO18A    | 17 | 24465203 | 3 | 1.043519 |
| rs12601535 | MYO18A    | 17 | 24465203 | 7 | 1.196434 |
| rs12601535 | MYO18A    | 17 | 24465203 | 2 | 5.292878 |
| rs1047790  | CRYBA1    | 17 | 24604882 | 5 | 0.718052 |
| rs1047790  | CRYBA1    | 17 | 24604882 | 7 | 0.968577 |
| rs3785961  | NUFIP2    | 17 | 24615451 | 7 | 0.129948 |
| rs11657079 | CORO6     | 17 | 24968215 | 7 | 0.953307 |
| rs9897794  | EFCAB5    | 17 | 25320453 | 7 | 0.982357 |
| rs9897794  | EFCAB5    | 17 | 25320453 | 5 | 0.652073 |
| rs9897794  | EFCAB5    | 17 | 25320453 | 2 | 2.611304 |
| rs9897794  | EFCAB5    | 17 | 25320453 | 3 | 1.408213 |
| rs1042173  | SLC6A4    | 17 | 25549137 | 3 | 0.721985 |
| rs1042173  | SLC6A4    | 17 | 25549137 | 5 | 0.697067 |
| rs7342921  | BLMH      | 17 | 25636574 | 8 | 0.377042 |
| rs7342921  | BLMH      | 17 | 25636574 | 2 | 4.480173 |
| rs7342921  | BLMH      | 17 | 25636574 | 3 | 2.341466 |
| rs7342921  | BLMH      | 17 | 25636574 | 5 | 6.939708 |
| rs999797   | ATAD5     | 17 | 26183455 | 5 | 0.259038 |
| rs9910051  | ATAD5     | 17 | 26185328 | 5 | 0.01071  |
| rs3816780  | ATAD5     | 17 | 26185484 | 5 | 0.092033 |
| rs17826219 | ATAD5     | 17 | 26185971 | 5 | 0.044202 |
| rs3087591  | EVI2B     | 17 | 26655096 | 5 | 4.823534 |
| rs3087591  | EVI2B     | 17 | 26655096 | 4 | 1.631993 |
| rs3087591  | EVI2B     | 17 | 26655096 | 1 | 4.264715 |
| rs1992     | RAB11FIP4 | 17 | 26883136 | 4 | 4.4558   |
| rs2290436  | RAB11FIP4 | 17 | 26883626 | 4 | 1.079066 |
| rs4795615  | RAB11FIP4 | 17 | 26884772 | 3 | 0.00973  |
| rs4795615  | RAB11FIP4 | 17 | 26884772 | 4 | 1.682629 |
| rs4795615  | RAB11FIP4 | 17 | 26884772 | 7 | 0.959766 |
| rs1548470  | RAB11FIP4 | 17 | 26886982 | 3 | 0.233769 |
| rs1548471  | RAB11FIP4 | 17 | 26887119 | 1 | 2.89473  |
| rs1548471  | RAB11FIP4 | 17 | 26887119 | 3 | 0.898892 |
| rs1548471  | RAB11FIP4 | 17 | 26887119 | 7 | 1.063551 |
| rs1551356  | RAB11FIP4 | 17 | 26888126 | 7 | 0.306147 |
| rs1551356  | RAB11FIP4 | 17 | 26888126 | 3 | 0.534514 |
| GA032273   | UTP6      | 17 | 27252769 | 1 | 6.510684 |
| rs739455   | MYO1D     | 17 | 27844963 | 1 | 4.619067 |
| rs739455   | MYO1D     | 17 | 27844963 | 6 | 3.877723 |
| rs34727343 | SPACA3    | 17 | 28346540 | 1 | 2.569226 |
| rs28933    | ACCN1     | 17 | 28364795 | 7 | 1.742528 |
| rs28933    | ACCN1     | 17 | 28364795 | 3 | 1.837716 |
| rs28933    | ACCN1     | 17 | 28364795 | 2 | 5.019427 |

|                |          |    |          |   |          |
|----------------|----------|----|----------|---|----------|
| rs28933        | ACCN1    | 17 | 28364795 | 8 | 4.25703  |
| rs28933        | ACCN1    | 17 | 28364795 | 4 | 0.452484 |
| rs7214382      | ACCN1    | 17 | 28643858 | 7 | 0.546508 |
| rs4795846      | TLK2P1   | 17 | 29388835 | 8 | 6.000017 |
| rs4795846      | TLK2P1   | 17 | 29388835 | 1 | 6.234254 |
| rs4795846      | TLK2P1   | 17 | 29388835 | 4 | 5.196982 |
| rs4795846      | TLK2P1   | 17 | 29388835 | 3 | 6.185878 |
| rs4795846      | TLK2P1   | 17 | 29388835 | 5 | 5.604916 |
| rs3744516      | TLK2P1   | 17 | 29390113 | 2 | 5.202023 |
| rs3744516      | TLK2P1   | 17 | 29390113 | 5 | 3.845401 |
| rs3744516      | TLK2P1   | 17 | 29390113 | 1 | 4.876304 |
| rs3744516      | TLK2P1   | 17 | 29390113 | 3 | 4.785503 |
| rs3744516      | TLK2P1   | 17 | 29390113 | 7 | 1.309623 |
| rs41274294     | CCL11    | 17 | 29639284 | 3 | 2.359412 |
| rs4795007      | FLJ44815 | 17 | 29927412 | 3 | 3.082838 |
| rs2230553      | CCT6B    | 17 | 30293761 | 3 | 0.481293 |
| rs2230553      | CCT6B    | 17 | 30293761 | 1 | 0.364022 |
| rs11658803     | CCT6B    | 17 | 30310777 | 4 | 2.680227 |
| SNP17-30312476 | CCT6B    | 17 | 30312476 | 4 | 0.746157 |
| SNP17-30312476 | CCT6B    | 17 | 30312476 | 3 | 1.380381 |
| SNP17-30312476 | CCT6B    | 17 | 30312476 | 1 | 3.549257 |
| SNP17-30312476 | CCT6B    | 17 | 30312476 | 7 | 0.74429  |
| rs3744355      | CCDC16   | 17 | 30313159 | 4 | 0.491738 |
| rs8249         | CCDC16   | 17 | 30314050 | 3 | 0.108258 |
| rs8249         | CCDC16   | 17 | 30314050 | 4 | 0.539237 |
| rs8249         | CCDC16   | 17 | 30314050 | 7 | 0.251544 |
| rs8249         | CCDC16   | 17 | 30314050 | 1 | 3.442048 |
| rs1871892      | FNDC8    | 17 | 30472931 | 5 | 0.527597 |
| rs1871892      | FNDC8    | 17 | 30472931 | 8 | 0.43947  |
| SNP17-30501355 | UNC45B   | 17 | 30501355 | 6 | 1.841859 |
| SNP17-30501355 | UNC45B   | 17 | 30501355 | 1 | 3.561637 |
| rs3744365      | UNC45B   | 17 | 30537704 | 8 | 1.075524 |
| rs17547201     | AMAC1    | 17 | 30544230 | 8 | 1.87441  |
| rs17547201     | AMAC1    | 17 | 30544230 | 1 | 1.701636 |
| rs1047268      | SLFN11   | 17 | 30701608 | 1 | 0.724988 |
| SNP17-30714579 | SLFN11   | 17 | 30714579 | 3 | 1.448815 |
| SNP17-30714579 | SLFN11   | 17 | 30714579 | 1 | 2.78965  |
| rs7210421      | SLFN13   | 17 | 30788845 | 5 | 0.090712 |
| SNP17-30796109 | SLFN13   | 17 | 30796109 | 6 | 0.075868 |
| rs8065635      | SLFN12L  | 17 | 30888820 | 3 | 0.01057  |
| rs1001441      | SLFN14   | 17 | 30900196 | 1 | 2.609894 |
| rs321613       | SLFN14   | 17 | 30905831 | 3 | 0.83865  |
| rs10068        | PEX12    | 17 | 30926078 | 1 | 0.190847 |
| rs10068        | PEX12    | 17 | 30926078 | 7 | 0.571268 |
| rs10068        | PEX12    | 17 | 30926078 | 8 | 1.109575 |
| rs10068        | PEX12    | 17 | 30926078 | 2 | 0.394823 |
| rs2278950      | PEX12    | 17 | 30929687 | 6 | 2.082492 |

|            |           |    |          |   |          |
|------------|-----------|----|----------|---|----------|
| rs17670584 | AP2B1     | 17 | 31023017 | 1 | 0.495289 |
| rs2240903  | AP2B1     | 17 | 31076270 | 3 | 0.011689 |
| rs2240902  | RASL10B   | 17 | 31093691 | 3 | 1.323175 |
| rs3744374  | GAS2L2    | 17 | 31096668 | 7 | 0.035291 |
| rs11654604 | GAS2L2    | 17 | 31101345 | 8 | 0.568138 |
| rs11654604 | GAS2L2    | 17 | 31101345 | 7 | 0.257238 |
| rs2306630  | C17orf66  | 17 | 31206454 | 3 | 1.107952 |
| rs1065341  | CCL5      | 17 | 31222706 | 5 | 0.812567 |
| rs2072667  | CCL23     | 17 | 31369075 | 3 | 0.458837 |
| rs1063340  | CCL3      | 17 | 31439876 | 3 | 0.362024 |
| rs1063340  | CCL3      | 17 | 31439876 | 7 | 1.351027 |
| rs2306590  | MYO19     | 17 | 31928393 | 2 | 3.966389 |
| rs2306590  | MYO19     | 17 | 31928393 | 7 | 0.025963 |
| rs1106908  | GGNBP2    | 17 | 32016708 | 1 | 0.68116  |
| rs2306658  | AATF      | 17 | 32380425 | 2 | 4.654458 |
| rs2306658  | AATF      | 17 | 32380425 | 4 | 1.618615 |
| rs2306658  | AATF      | 17 | 32380425 | 7 | 0.469679 |
| rs2306658  | AATF      | 17 | 32380425 | 8 | 2.560995 |
| rs2306658  | AATF      | 17 | 32380425 | 1 | 0.221434 |
| rs2229416  | ACACA     | 17 | 32683979 | 3 | 0.113646 |
| rs2229416  | ACACA     | 17 | 32683979 | 7 | 4.615476 |
| rs1714987  | C17orf78  | 17 | 32817123 | 3 | 0.405323 |
| rs1714987  | C17orf78  | 17 | 32817123 | 1 | 2.180092 |
| rs7211875  | TADA2L    | 17 | 32845581 | 7 | 1.266594 |
| rs1051838  | DUSP14    | 17 | 32944946 | 3 | 0.080201 |
| rs1051838  | DUSP14    | 17 | 32944946 | 7 | 0.122798 |
| rs1051838  | DUSP14    | 17 | 32944946 | 1 | 3.297161 |
| rs3110623  | AP1GBP1   | 17 | 32976338 | 5 | 0.994546 |
| rs3110623  | AP1GBP1   | 17 | 32976338 | 3 | 1.21613  |
| rs3110623  | AP1GBP1   | 17 | 32976338 | 8 | 4.287084 |
| rs3110623  | AP1GBP1   | 17 | 32976338 | 1 | 5.872524 |
| rs2688     | HNF1B     | 17 | 33121044 | 5 | 0.023496 |
| rs2688     | HNF1B     | 17 | 33121044 | 3 | 0.600015 |
| rs1058166  | HNF1B     | 17 | 33121104 | 3 | 0.308655 |
| rs2689     | HNF1B     | 17 | 33121214 | 1 | 3.015559 |
| rs9896972  | LOC284100 | 17 | 33308019 | 7 | 3.787636 |
| rs8075324  | ARHGAP23  | 17 | 33876008 | 3 | 0.455708 |
| rs8075324  | ARHGAP23  | 17 | 33876008 | 1 | 0.039284 |
| rs8075324  | ARHGAP23  | 17 | 33876008 | 2 | 1.496379 |
| rs8075324  | ARHGAP23  | 17 | 33876008 | 7 | 1.280679 |
| rs228290   | PIP4K2B   | 17 | 34180293 | 4 | 3.522056 |
| rs228290   | PIP4K2B   | 17 | 34180293 | 6 | 0.400892 |
| rs228290   | PIP4K2B   | 17 | 34180293 | 8 | 0.298209 |
| rs228290   | PIP4K2B   | 17 | 34180293 | 5 | 1.240647 |
| rs228290   | PIP4K2B   | 17 | 34180293 | 3 | 0.210037 |
| rs1130638  | LASP1     | 17 | 34308298 | 4 | 1.142649 |
| rs1130638  | LASP1     | 17 | 34308298 | 3 | 0.866705 |

|            |         |    |          |   |          |
|------------|---------|----|----------|---|----------|
| rs1130638  | LASP1   | 17 | 34308298 | 1 | 4.48748  |
| rs12603439 | PLXDC1  | 17 | 34473898 | 7 | 1.204165 |
| rs12603439 | PLXDC1  | 17 | 34473898 | 3 | 0.486747 |
| rs12603439 | PLXDC1  | 17 | 34473898 | 4 | 1.695734 |
| rs12603439 | PLXDC1  | 17 | 34473898 | 8 | 0.619454 |
| rs12603439 | PLXDC1  | 17 | 34473898 | 6 | 0.274813 |
| rs12453592 | PLXDC1  | 17 | 34475999 | 4 | 0.472458 |
| rs12453592 | PLXDC1  | 17 | 34475999 | 3 | 0.520393 |
| rs12453595 | PLXDC1  | 17 | 34476009 | 3 | 1.377946 |
| rs12453595 | PLXDC1  | 17 | 34476009 | 4 | 0.228192 |
| rs12453595 | PLXDC1  | 17 | 34476009 | 7 | 0.438597 |
| rs7221482  | PLXDC1  | 17 | 34476652 | 1 | 0.031863 |
| rs13755    | PLXDC1  | 17 | 34476984 | 2 | 0.622181 |
| rs13755    | PLXDC1  | 17 | 34476984 | 1 | 1.040568 |
| rs13755    | PLXDC1  | 17 | 34476984 | 7 | 0.139251 |
| rs13755    | PLXDC1  | 17 | 34476984 | 3 | 0.403743 |
| rs13755    | PLXDC1  | 17 | 34476984 | 8 | 6.633419 |
| rs3254     | PLXDC1  | 17 | 34477162 | 3 | 0.307288 |
| rs3254     | PLXDC1  | 17 | 34477162 | 7 | 1.56988  |
| rs3254     | PLXDC1  | 17 | 34477162 | 4 | 2.101838 |
| rs14325    | PLXDC1  | 17 | 34477254 | 8 | 0.468828 |
| rs14325    | PLXDC1  | 17 | 34477254 | 6 | 7.856469 |
| rs14325    | PLXDC1  | 17 | 34477254 | 7 | 0.698355 |
| rs14325    | PLXDC1  | 17 | 34477254 | 4 | 1.728003 |
| rs14325    | PLXDC1  | 17 | 34477254 | 3 | 0.451735 |
| rs12602945 | PLXDC1  | 17 | 34497453 | 7 | 4.170878 |
| rs12602945 | PLXDC1  | 17 | 34497453 | 3 | 0.517262 |
| rs12602945 | PLXDC1  | 17 | 34497453 | 4 | 3.413317 |
| rs12602945 | PLXDC1  | 17 | 34497453 | 8 | 0.911692 |
| rs12602945 | PLXDC1  | 17 | 34497453 | 2 | 4.873986 |
| rs12602945 | PLXDC1  | 17 | 34497453 | 6 | 1.921006 |
| rs519512   | STAC2   | 17 | 34620514 | 6 | 0.056788 |
| rs521397   | STAC2   | 17 | 34620732 | 8 | 7.854725 |
| rs521397   | STAC2   | 17 | 34620732 | 6 | 2.511629 |
| rs1054488  | CRKRS   | 17 | 34941494 | 8 | 5.661398 |
| rs11078918 | NEUROD2 | 17 | 35014711 | 5 | 1.158306 |
| GA032374   | STARD3  | 17 | 35069275 | 4 | 0.047722 |
| GA032377   | STARD3  | 17 | 35072983 | 4 | 4.512317 |
| rs1053651  | TCAP    | 17 | 35075837 | 3 | 0.533329 |
| rs1053651  | TCAP    | 17 | 35075837 | 7 | 0.292055 |
| rs1053651  | TCAP    | 17 | 35075837 | 5 | 1.285688 |
| rs2941503  | PERLD1  | 17 | 35082271 | 3 | 0.496244 |
| rs2941503  | PERLD1  | 17 | 35082271 | 7 | 0.247291 |
| rs2941503  | PERLD1  | 17 | 35082271 | 2 | 3.866197 |
| rs2941503  | PERLD1  | 17 | 35082271 | 8 | 0.301602 |
| rs2941503  | PERLD1  | 17 | 35082271 | 5 | 0.106384 |
| rs907087   | PERLD1  | 17 | 35082313 | 7 | 2.264707 |

|                |          |    |          |   |          |
|----------------|----------|----|----------|---|----------|
| rs907087       | PERLD1   | 17 | 35082313 | 3 | 1.550895 |
| rs907087       | PERLD1   | 17 | 35082313 | 2 | 0.609276 |
| rs907087       | PERLD1   | 17 | 35082313 | 8 | 3.523352 |
| rs907087       | PERLD1   | 17 | 35082313 | 4 | 2.048966 |
| rs907087       | PERLD1   | 17 | 35082313 | 5 | 4.081007 |
| SNP17-35137702 | ERBB2    | 17 | 35137702 | 4 | 5.389282 |
| rs2305479      | GSDML    | 17 | 35315743 | 4 | 0.559215 |
| rs2305479      | GSDML    | 17 | 35315743 | 3 | 0.785928 |
| rs2305479      | GSDML    | 17 | 35315743 | 5 | 0.36445  |
| rs2305479      | GSDML    | 17 | 35315743 | 8 | 0.94009  |
| rs3902025      | GSDM1    | 17 | 35372780 | 5 | 0.945584 |
| rs3902025      | GSDM1    | 17 | 35372780 | 3 | 0.285667 |
| rs3902025      | GSDM1    | 17 | 35372780 | 7 | 0.477103 |
| rs3902025      | GSDM1    | 17 | 35372780 | 8 | 5.989913 |
| rs7212944      | GSDM1    | 17 | 35376212 | 6 | 0.54682  |
| rs7212944      | GSDM1    | 17 | 35376212 | 7 | 3.010623 |
| rs7212944      | GSDM1    | 17 | 35376212 | 1 | 3.932185 |
| SNP17-35384713 | GSDM1    | 17 | 35384713 | 5 | 0.838639 |
| SNP17-35384713 | GSDM1    | 17 | 35384713 | 8 | 3.930477 |
| SNP17-35384713 | GSDM1    | 17 | 35384713 | 7 | 0.847567 |
| SNP17-35384713 | GSDM1    | 17 | 35384713 | 1 | 4.490907 |
| rs25645        | CSF3     | 17 | 35426669 | 7 | 0.8526   |
| rs25645        | CSF3     | 17 | 35426669 | 8 | 1.135504 |
| rs2827         | CSF3     | 17 | 35427263 | 3 | 0.544595 |
| rs1042657      | CSF3     | 17 | 35427318 | 6 | 6.97298  |
| rs1042658      | CSF3     | 17 | 35427428 | 5 | 0.553244 |
| rs1042658      | CSF3     | 17 | 35427428 | 1 | 1.839775 |
| rs1042658      | CSF3     | 17 | 35427428 | 3 | 0.595726 |
| rs17850739     | MED24    | 17 | 35439632 | 3 | 0.739884 |
| GA032434       | RAPGEFL1 | 17 | 35604109 | 5 | 0.24703  |
| GA032434       | RAPGEFL1 | 17 | 35604109 | 6 | 0.99238  |
| rs13706        | CDC6     | 17 | 35710677 | 6 | 5.143622 |
| rs3169906      | TNS4     | 17 | 35886287 | 3 | 0.520391 |
| rs3169906      | TNS4     | 17 | 35886287 | 2 | 4.725943 |
| rs874889       | KRT24    | 17 | 36110972 | 2 | 0.444076 |
| rs874889       | KRT24    | 17 | 36110972 | 1 | 0.914807 |
| rs981684       | KRT27    | 17 | 36189338 | 2 | 1.707261 |
| rs981684       | KRT27    | 17 | 36189338 | 1 | 3.148692 |
| rs17558532     | KRT27    | 17 | 36189402 | 2 | 1.921277 |
| SNP17-36209517 | KRT28    | 17 | 36209517 | 6 | 1.660972 |
| GA014320       | KRT10    | 17 | 36231988 | 5 | 0.889663 |
| GA014320       | KRT10    | 17 | 36231988 | 1 | 0.918338 |
| rs2240078      | TMEM99   | 17 | 36244360 | 3 | 0.446658 |
| rs11650915     | KRT12    | 17 | 36276922 | 1 | 3.930829 |
| rs11650915     | KRT12    | 17 | 36276922 | 3 | 0.001091 |
| rs11650915     | KRT12    | 17 | 36276922 | 4 | 0.367781 |
| rs3169914      | KRT20    | 17 | 36285921 | 7 | 0.177694 |

|                |          |    |          |   |          |
|----------------|----------|----|----------|---|----------|
| rs3169914      | KRT20    | 17 | 36285921 | 2 | 3.473845 |
| rs3169914      | KRT20    | 17 | 36285921 | 3 | 0.515015 |
| rs3169914      | KRT20    | 17 | 36285921 | 5 | 0.358242 |
| rs7212483      | KRT20    | 17 | 36294578 | 2 | 3.788225 |
| rs7212483      | KRT20    | 17 | 36294578 | 7 | 0.525563 |
| rs7212483      | KRT20    | 17 | 36294578 | 3 | 0.952752 |
| rs9257         | KRT23    | 17 | 36338030 | 1 | 1.056114 |
| rs9257         | KRT23    | 17 | 36338030 | 2 | 4.879586 |
| rs9257         | KRT23    | 17 | 36338030 | 7 | 0.829066 |
| rs9257         | KRT23    | 17 | 36338030 | 4 | 1.329079 |
| SNP17-36388610 | KRT40    | 17 | 36388610 | 2 | 1.842973 |
| SNP17-36388610 | KRT40    | 17 | 36388610 | 7 | 1.779642 |
| SNP17-36390823 | KRT40    | 17 | 36390823 | 7 | 0.647031 |
| SNP17-36390823 | KRT40    | 17 | 36390823 | 1 | 0.735421 |
| SNP17-36390823 | KRT40    | 17 | 36390823 | 3 | 0.703138 |
| SNP17-36390823 | KRT40    | 17 | 36390823 | 4 | 0.261677 |
| SNP17-36390823 | KRT40    | 17 | 36390823 | 6 | 1.214681 |
| SNP17-36390823 | KRT40    | 17 | 36390823 | 2 | 1.607319 |
| SNP17-36392896 | KRT40    | 17 | 36392896 | 2 | 2.572095 |
| SNP17-36392896 | KRT40    | 17 | 36392896 | 7 | 1.605129 |
| SNP17-36393747 | KRT40    | 17 | 36393747 | 2 | 6.49166  |
| SNP17-36393747 | KRT40    | 17 | 36393747 | 7 | 0.702785 |
| rs937403       | KRTAP4-6 | 17 | 36549542 | 2 | 2.529314 |
| rs937403       | KRTAP4-6 | 17 | 36549542 | 8 | 2.206692 |
| rs937403       | KRTAP4-6 | 17 | 36549542 | 7 | 0.641297 |
| rs16966703     | KRT33A   | 17 | 36755924 | 3 | 0.350211 |
| rs16966703     | KRT33A   | 17 | 36755924 | 1 | 2.17657  |
| rs1047449      | KRT31    | 17 | 36803677 | 1 | 2.51691  |
| rs1047449      | KRT31    | 17 | 36803677 | 3 | 0.104749 |
| rs1047449      | KRT31    | 17 | 36803677 | 7 | 0.088881 |
| rs1047448      | KRT31    | 17 | 36803778 | 1 | 4.182413 |
| rs1047448      | KRT31    | 17 | 36803778 | 3 | 1.568847 |
| rs1047448      | KRT31    | 17 | 36803778 | 7 | 4.865269 |
| rs17737019     | KRT37    | 17 | 36830706 | 4 | 0.584739 |
| rs8071814      | KRT37    | 17 | 36830741 | 3 | 0.545388 |
| SNP17-36834265 | KRT37    | 17 | 36834265 | 8 | 0.155188 |
| SNP17-36834265 | KRT37    | 17 | 36834265 | 5 | 0.202581 |
| SNP17-36834265 | KRT37    | 17 | 36834265 | 6 | 0.722987 |
| rs877459       | KRT38    | 17 | 36846946 | 2 | 3.037435 |
| rs897416       | KRT38    | 17 | 36847294 | 3 | 2.885098 |
| rs12948056     | KRT32    | 17 | 36873925 | 4 | 0.016642 |
| rs12948056     | KRT32    | 17 | 36873925 | 2 | 2.03165  |
| rs12948056     | KRT32    | 17 | 36873925 | 8 | 0.843001 |
| rs12948056     | KRT32    | 17 | 36873925 | 3 | 0.391625 |
| SNP17-36874091 | KRT32    | 17 | 36874091 | 6 | 1.492106 |
| SNP17-36874091 | KRT32    | 17 | 36874091 | 8 | 5.097775 |
| SNP17-36874091 | KRT32    | 17 | 36874091 | 7 | 0.909757 |

|                |        |    |          |   |          |
|----------------|--------|----|----------|---|----------|
| SNP17-36874091 | KRT32  | 17 | 36874091 | 5 | 1.012722 |
| SNP17-36874091 | KRT32  | 17 | 36874091 | 4 | 0.046628 |
| SNP17-36875594 | KRT32  | 17 | 36875594 | 1 | 0.999047 |
| SNP17-36875594 | KRT32  | 17 | 36875594 | 4 | 0.628944 |
| SNP17-36875594 | KRT32  | 17 | 36875594 | 5 | 1.503486 |
| SNP17-36875594 | KRT32  | 17 | 36875594 | 6 | 1.947137 |
| rs1807434      | KRT32  | 17 | 36877148 | 1 | 0.802357 |
| rs1807434      | KRT32  | 17 | 36877148 | 5 | 1.403954 |
| rs743686       | KRT35  | 17 | 36890770 | 1 | 0.52148  |
| rs743686       | KRT35  | 17 | 36890770 | 5 | 0.127999 |
| rs743686       | KRT35  | 17 | 36890770 | 2 | 0.217994 |
| rs743686       | KRT35  | 17 | 36890770 | 3 | 0.386712 |
| rs743686       | KRT35  | 17 | 36890770 | 4 | 0.000707 |
| rs743686       | KRT35  | 17 | 36890770 | 7 | 0.985597 |
| rs11657323     | KRT36  | 17 | 36896866 | 3 | 0.934871 |
| rs11657323     | KRT36  | 17 | 36896866 | 2 | 0.877679 |
| rs11657323     | KRT36  | 17 | 36896866 | 8 | 1.116298 |
| rs2301354      | KRT36  | 17 | 36897172 | 5 | 0.579141 |
| rs2301354      | KRT36  | 17 | 36897172 | 4 | 0.480996 |
| rs9891361      | KRT13  | 17 | 36913439 | 5 | 1.722445 |
| rs9891361      | KRT13  | 17 | 36913439 | 6 | 0.905034 |
| rs4796681      | KRT16  | 17 | 37021270 | 3 | 0.471747 |
| rs4796681      | KRT16  | 17 | 37021270 | 8 | 4.823433 |
| rs7213337      | HAP1   | 17 | 37132954 | 2 | 2.52025  |
| rs33914436     | HAP1   | 17 | 37137085 | 7 | 0.082613 |
| rs35612698     | HAP1   | 17 | 37137591 | 4 | 0.62188  |
| rs35612698     | HAP1   | 17 | 37137591 | 5 | 0.435996 |
| rs4796693      | HAP1   | 17 | 37138109 | 6 | 0.045664 |
| rs4796693      | HAP1   | 17 | 37138109 | 8 | 1.410501 |
| rs4796693      | HAP1   | 17 | 37138109 | 2 | 2.739842 |
| rs4796693      | HAP1   | 17 | 37138109 | 7 | 0.538303 |
| rs1128966      | NT5C3L | 17 | 37237375 | 6 | 6.580381 |
| rs1128966      | NT5C3L | 17 | 37237375 | 5 | 0.099088 |
| rs1128966      | NT5C3L | 17 | 37237375 | 8 | 1.150504 |
| rs1128966      | NT5C3L | 17 | 37237375 | 3 | 0.936401 |
| rs4796712      | NT5C3L | 17 | 37240656 | 6 | 0.808928 |
| rs4796712      | NT5C3L | 17 | 37240656 | 8 | 0.842462 |
| rs17498875     | KLHL11 | 17 | 37263481 | 7 | 1.177519 |
| rs17498875     | KLHL11 | 17 | 37263481 | 4 | 0.28473  |
| rs3809878      | TTC25  | 17 | 37348361 | 1 | 3.655796 |
| rs3809878      | TTC25  | 17 | 37348361 | 3 | 1.226908 |
| rs3809878      | TTC25  | 17 | 37348361 | 5 | 0.226524 |
| rs11079028     | CNP    | 17 | 37379659 | 4 | 1.31891  |
| rs4796751      | CNP    | 17 | 37381063 | 8 | 0.317736 |
| rs4796751      | CNP    | 17 | 37381063 | 1 | 4.078381 |
| rs4796751      | CNP    | 17 | 37381063 | 3 | 0.156843 |
| rs4796751      | CNP    | 17 | 37381063 | 6 | 0.53605  |

|                |          |    |          |   |          |
|----------------|----------|----|----------|---|----------|
| rs4796760      | ZNF385C  | 17 | 37431741 | 6 | 2.044323 |
| rs4796760      | ZNF385C  | 17 | 37431741 | 1 | 4.66093  |
| SNP17-37510581 | DHX58    | 17 | 37510581 | 5 | 6.225215 |
| SNP17-37510581 | DHX58    | 17 | 37510581 | 1 | 4.702464 |
| rs2074158      | DHX58    | 17 | 37510689 | 5 | 0.399081 |
| rs2074158      | DHX58    | 17 | 37510689 | 1 | 2.570976 |
| rs17659391     | GCN5L2   | 17 | 37520465 | 2 | 3.720459 |
| rs1122326      | HSPB9    | 17 | 37528399 | 1 | 2.959342 |
| rs1122326      | HSPB9    | 17 | 37528399 | 5 | 0.863735 |
| rs939881       | KCNH4    | 17 | 37575778 | 3 | 0.552786 |
| rs4796777      | HCRT     | 17 | 37590929 | 5 | 0.589053 |
| rs1135669      | STAT5A   | 17 | 37713263 | 3 | 0.872767 |
| rs1135669      | STAT5A   | 17 | 37713263 | 1 | 4.723357 |
| rs1135669      | STAT5A   | 17 | 37713263 | 5 | 3.946311 |
| rs2067694      | STAT5A   | 17 | 37716057 | 1 | 5.216234 |
| rs709631       | PTRF     | 17 | 37809465 | 6 | 0.132498 |
| rs709631       | PTRF     | 17 | 37809465 | 1 | 3.626879 |
| rs709631       | PTRF     | 17 | 37809465 | 5 | 0.23575  |
| rs709631       | PTRF     | 17 | 37809465 | 3 | 1.111947 |
| rs607795       | HSD17BP1 | 17 | 37952858 | 4 | 6.257066 |
| rs607795       | HSD17BP1 | 17 | 37952858 | 3 | 2.902295 |
| rs607795       | HSD17BP1 | 17 | 37952858 | 6 | 3.106926 |
| rs2277618      | PLEKHH3  | 17 | 38076204 | 8 | 1.78133  |
| rs2277618      | PLEKHH3  | 17 | 38076204 | 6 | 1.324631 |
| rs2277618      | PLEKHH3  | 17 | 38076204 | 5 | 0.352826 |
| rs2277618      | PLEKHH3  | 17 | 38076204 | 2 | 5.336431 |
| rs2277618      | PLEKHH3  | 17 | 38076204 | 4 | 1.497462 |
| rs2271029      | CNTNAP1  | 17 | 38089448 | 5 | 0.338066 |
| rs12449771     | CNTNAP1  | 17 | 38105311 | 8 | 1.676724 |
| rs1043284      | RUNDC1   | 17 | 38399053 | 1 | 4.482001 |
| rs10840        | IFI35    | 17 | 38419943 | 1 | 4.962604 |
| rs4986852      | BRCA1    | 17 | 38497955 | 7 | 4.042541 |
| rs4986850      | BRCA1    | 17 | 38498997 | 1 | 5.54742  |
| rs15359        | DUSP3    | 17 | 39199505 | 1 | 4.058142 |
| rs15359        | DUSP3    | 17 | 39199505 | 7 | 0.062783 |
| rs11713        | DUSP3    | 17 | 39201350 | 7 | 0.18175  |
| rs231522       | MPP2     | 17 | 39310128 | 8 | 0.975869 |
| rs231521       | MPP2     | 17 | 39310684 | 6 | 0.210473 |
| rs231521       | MPP2     | 17 | 39310684 | 8 | 2.879728 |
| rs124721       | MPP2     | 17 | 39315334 | 8 | 0.258959 |
| rs1058046      | PYY      | 17 | 39386057 | 8 | 0.768648 |
| rs2070592      | PYY      | 17 | 39386857 | 1 | 0.472896 |
| rs2070592      | PYY      | 17 | 39386857 | 2 | 0.078945 |
| rs375171       | HDAC5    | 17 | 39509996 | 7 | 0.688277 |
| rs375171       | HDAC5    | 17 | 39509996 | 8 | 4.940766 |
| rs375171       | HDAC5    | 17 | 39509996 | 5 | 0.741098 |
| rs375171       | HDAC5    | 17 | 39509996 | 4 | 0.995898 |



|                |           |    |          |   |          |
|----------------|-----------|----|----------|---|----------|
| rs228757       | HDAC5     | 17 | 39520411 | 4 | 2.915094 |
| rs228757       | HDAC5     | 17 | 39520411 | 8 | 0.453354 |
| rs13726        | C17orf53  | 17 | 39595087 | 4 | 5.883203 |
| rs13726        | C17orf53  | 17 | 39595087 | 5 | 1.074662 |
| rs13726        | C17orf53  | 17 | 39595087 | 1 | 4.831663 |
| SNP17-39609807 | ASB16     | 17 | 39609807 | 5 | 0.242647 |
| SNP17-39609807 | ASB16     | 17 | 39609807 | 4 | 0.237114 |
| SNP17-39609807 | ASB16     | 17 | 39609807 | 1 | 4.311696 |
| SNP17-39609807 | ASB16     | 17 | 39609807 | 6 | 0.078715 |
| rs7217858      | ASB16     | 17 | 39610053 | 5 | 0.348614 |
| rs7217858      | ASB16     | 17 | 39610053 | 1 | 1.020401 |
| rs7217858      | ASB16     | 17 | 39610053 | 8 | 0.94688  |
| rs7217858      | ASB16     | 17 | 39610053 | 6 | 0.916086 |
| rs12937692     | ASB16     | 17 | 39611956 | 5 | 1.540777 |
| rs12937692     | ASB16     | 17 | 39611956 | 4 | 2.271052 |
| rs12937692     | ASB16     | 17 | 39611956 | 8 | 1.465634 |
| rs12937692     | ASB16     | 17 | 39611956 | 1 | 0.935982 |
| SNP17-39623475 | TMUB2     | 17 | 39623475 | 5 | 0.644045 |
| rs5910         | ITGA2B    | 17 | 39805315 | 6 | 0.724982 |
| rs5910         | ITGA2B    | 17 | 39805315 | 1 | 0.718183 |
| rs5910         | ITGA2B    | 17 | 39805315 | 4 | 0.692159 |
| rs5911         | ITGA2B    | 17 | 39808591 | 1 | 0.020577 |
| rs2070605      | ADAM11    | 17 | 40211080 | 8 | 0.593448 |
| rs2070605      | ADAM11    | 17 | 40211080 | 3 | 0.797967 |
| rs8067254      | GFAP      | 17 | 40339903 | 1 | 1.318253 |
| rs2289681      | GFAP      | 17 | 40344614 | 3 | 0.026764 |
| SNP17-40359962 | KIF18B    | 17 | 40359962 | 3 | 0.537614 |
| rs17546822     | LOC146909 | 17 | 40364496 | 3 | 0.349652 |
| rs1055646      | C1QL1     | 17 | 40392717 | 7 | 0.905838 |
| rs1055646      | C1QL1     | 17 | 40392717 | 5 | 0.886738 |
| rs1055646      | C1QL1     | 17 | 40392717 | 4 | 0.571066 |
| rs2239922      | NMT1      | 17 | 40531432 | 4 | 0.724765 |
| rs1989803      | NMT1      | 17 | 40541018 | 7 | 7.405315 |
| rs1989803      | NMT1      | 17 | 40541018 | 3 | 0.578181 |
| rs11651968     | C17orf46  | 17 | 40688908 | 5 | 1.817478 |
| rs11651968     | C17orf46  | 17 | 40688908 | 1 | 4.075995 |
| rs11651968     | C17orf46  | 17 | 40688908 | 3 | 1.805491 |
| rs11651968     | C17orf46  | 17 | 40688908 | 4 | 2.414817 |
| rs11651968     | C17orf46  | 17 | 40688908 | 7 | 1.949315 |
| rs11651968     | C17orf46  | 17 | 40688908 | 6 | 3.540798 |
| rs1047841      | MAP3K14   | 17 | 40696414 | 6 | 0.51884  |
| rs1047833      | MAP3K14   | 17 | 40697924 | 5 | 0.037572 |
| rs1047833      | MAP3K14   | 17 | 40697924 | 7 | 4.674048 |
| rs1047833      | MAP3K14   | 17 | 40697924 | 8 | 3.224248 |
| rs2942168      | MGC57346  | 17 | 41070633 | 3 | 0.571678 |
| rs2942168      | MGC57346  | 17 | 41070633 | 4 | 1.078094 |
| rs2942168      | MGC57346  | 17 | 41070633 | 6 | 4.332281 |

|                |          |    |          |   |          |
|----------------|----------|----|----------|---|----------|
| rs16940665     | CRHR1    | 17 | 41263677 | 3 | 3.892015 |
| rs16940665     | CRHR1    | 17 | 41263677 | 6 | 4.257601 |
| rs878886       | CRHR1    | 17 | 41268271 | 6 | 2.664446 |
| rs878888       | CRHR1    | 17 | 41268416 | 6 | 6.238033 |
| rs878888       | CRHR1    | 17 | 41268416 | 3 | 3.801708 |
| rs878888       | CRHR1    | 17 | 41268416 | 4 | 2.401171 |
| rs4525537      | CRHR1    | 17 | 41268504 | 4 | 4.298423 |
| rs4525537      | CRHR1    | 17 | 41268504 | 3 | 5.139514 |
| rs4525537      | CRHR1    | 17 | 41268504 | 6 | 5.742503 |
| rs4640231      | CRHR1    | 17 | 41268567 | 3 | 3.071154 |
| rs4640231      | CRHR1    | 17 | 41268567 | 6 | 3.22567  |
| rs4640231      | CRHR1    | 17 | 41268567 | 4 | 1.509761 |
| rs12185233     | IMP5     | 17 | 41279434 | 3 | 1.584527 |
| rs12185268     | IMP5     | 17 | 41279463 | 3 | 0.516839 |
| rs11079725     | IMP5     | 17 | 41279714 | 3 | 1.147299 |
| SNP17-41416612 | MAPT     | 17 | 41416612 | 3 | 0.373808 |
| rs10445337     | MAPT     | 17 | 41423237 | 6 | 0.817724 |
| rs10445337     | MAPT     | 17 | 41423237 | 3 | 1.66196  |
| rs1052551      | MAPT     | 17 | 41424761 | 6 | 0.487521 |
| rs1052551      | MAPT     | 17 | 41424761 | 3 | 0.10598  |
| rs1052551      | MAPT     | 17 | 41424761 | 4 | 0.994317 |
| rs1052553      | MAPT     | 17 | 41429726 | 6 | 2.692923 |
| rs1052553      | MAPT     | 17 | 41429726 | 4 | 0.018236 |
| rs1052553      | MAPT     | 17 | 41429726 | 3 | 0.364449 |
| rs17652121     | MAPT     | 17 | 41429810 | 4 | 0.020294 |
| rs17652121     | MAPT     | 17 | 41429810 | 3 | 0.991639 |
| rs11568305     | MAPT     | 17 | 41429855 | 1 | 5.68667  |
| rs1052587      | MAPT     | 17 | 41458449 | 4 | 0.280291 |
| rs1052587      | MAPT     | 17 | 41458449 | 3 | 0.271228 |
| rs1052587      | MAPT     | 17 | 41458449 | 6 | 1.781358 |
| rs17574040     | MAPT     | 17 | 41458711 | 4 | 0.357157 |
| rs17574040     | MAPT     | 17 | 41458711 | 3 | 1.702504 |
| rs17574040     | MAPT     | 17 | 41458711 | 6 | 0.163292 |
| rs16940799     | MAPT     | 17 | 41458779 | 6 | 0.081297 |
| rs16940799     | MAPT     | 17 | 41458779 | 4 | 1.570031 |
| rs16940799     | MAPT     | 17 | 41458779 | 3 | 0.907269 |
| rs2158257      | MAPT     | 17 | 41460189 | 3 | 1.651313 |
| rs2158257      | MAPT     | 17 | 41460189 | 6 | 0.30643  |
| rs17574228     | MAPT     | 17 | 41460355 | 6 | 0.54691  |
| rs17574228     | MAPT     | 17 | 41460355 | 4 | 0.17463  |
| rs17574228     | MAPT     | 17 | 41460355 | 3 | 1.139239 |
| rs7521         | MAPT     | 17 | 41461242 | 1 | 0.97248  |
| rs7521         | MAPT     | 17 | 41461242 | 8 | 0.639255 |
| rs7521         | MAPT     | 17 | 41461242 | 2 | 0.524307 |
| rs7521         | MAPT     | 17 | 41461242 | 7 | 0.470349 |
| rs7521         | MAPT     | 17 | 41461242 | 3 | 0.63316  |
| rs36076725     | KIAA1267 | 17 | 41466379 | 4 | 1.828805 |

|                |          |    |          |   |          |
|----------------|----------|----|----------|---|----------|
| rs36076725     | KIAA1267 | 17 | 41466379 | 6 | 3.413402 |
| rs36076725     | KIAA1267 | 17 | 41466379 | 3 | 2.057864 |
| rs35833914     | KIAA1267 | 17 | 41466388 | 3 | 0.220519 |
| rs35833914     | KIAA1267 | 17 | 41466388 | 6 | 2.227563 |
| rs35833914     | KIAA1267 | 17 | 41466388 | 4 | 0.427929 |
| rs2240758      | KIAA1267 | 17 | 41604276 | 8 | 9.898429 |
| rs12944167     | GOSR2    | 17 | 42355564 | 3 | 1.037172 |
| SNP17-42569622 | CDC27    | 17 | 42569622 | 4 | 4.741595 |
| SNP17-42569622 | CDC27    | 17 | 42569622 | 1 | 5.672499 |
| SNP17-42569622 | CDC27    | 17 | 42569622 | 3 | 5.022777 |
| SNP17-42569622 | CDC27    | 17 | 42569622 | 2 | 4.565713 |
| rs5918         | ITGB3    | 17 | 42715729 | 7 | 3.452383 |
| rs5918         | ITGB3    | 17 | 42715729 | 6 | 1.749655 |
| rs16941864     | ITGB3    | 17 | 42743240 | 7 | 1.931583 |
| rs2317676      | ITGB3    | 17 | 42743282 | 7 | 0.55131  |
| rs2317676      | ITGB3    | 17 | 42743282 | 2 | 0.810787 |
| rs3809865      | ITGB3    | 17 | 42743585 | 1 | 5.272098 |
| rs3809865      | ITGB3    | 17 | 42743585 | 7 | 1.782874 |
| rs3809865      | ITGB3    | 17 | 42743585 | 4 | 0.639451 |
| rs3809865      | ITGB3    | 17 | 42743585 | 6 | 0.4529   |
| rs4968318      | C17orf57 | 17 | 42806893 | 4 | 0.509582 |
| rs4968318      | C17orf57 | 17 | 42806893 | 8 | 1.98744  |
| rs4968318      | C17orf57 | 17 | 42806893 | 7 | 0.305262 |
| rs4968318      | C17orf57 | 17 | 42806893 | 1 | 5.103702 |
| rs4968318      | C17orf57 | 17 | 42806893 | 6 | 1.492664 |
| rs3883318      | C17orf57 | 17 | 42845250 | 3 | 0.76499  |
| rs6503807      | TBKBP1   | 17 | 43127931 | 3 | 1.775359 |
| SNP17-43141620 | TBKBP1   | 17 | 43141620 | 2 | 1.505492 |
| SNP17-43141620 | TBKBP1   | 17 | 43141620 | 1 | 0.229205 |
| SNP17-43141620 | TBKBP1   | 17 | 43141620 | 3 | 1.009893 |
| rs9907142      | OSBPL7   | 17 | 43240686 | 2 | 5.669433 |
| rs2301690      | OSBPL7   | 17 | 43245706 | 6 | 0.328245 |
| rs2301690      | OSBPL7   | 17 | 43245706 | 2 | 0.881133 |
| rs2301690      | OSBPL7   | 17 | 43245706 | 3 | 0.135997 |
| rs2301690      | OSBPL7   | 17 | 43245706 | 1 | 0.374758 |
| rs17700839     | OSBPL7   | 17 | 43254056 | 1 | 0.705216 |
| rs17700839     | OSBPL7   | 17 | 43254056 | 6 | 0.287027 |
| rs17700839     | OSBPL7   | 17 | 43254056 | 2 | 0.501894 |
| rs17700839     | OSBPL7   | 17 | 43254056 | 3 | 0.006224 |
| rs16948568     | MRPL10   | 17 | 43259419 | 1 | 0.51927  |
| rs16948568     | MRPL10   | 17 | 43259419 | 3 | 0.759362 |
| rs16948568     | MRPL10   | 17 | 43259419 | 6 | 0.219507 |
| rs2277693      | LRRC46   | 17 | 43264182 | 1 | 0.664745 |
| rs2277693      | LRRC46   | 17 | 43264182 | 6 | 3.439945 |
| rs2277693      | LRRC46   | 17 | 43264182 | 3 | 0.000617 |
| rs2277693      | LRRC46   | 17 | 43264182 | 2 | 3.02048  |
| rs10428        | SCRN2    | 17 | 43270085 | 7 | 0.181483 |

|                |          |    |          |   |          |
|----------------|----------|----|----------|---|----------|
| rs16948835     | SP6      | 17 | 43288164 | 4 | 1.319637 |
| rs16948835     | SP6      | 17 | 43288164 | 1 | 1.220783 |
| SNP17-43355405 | SP2      | 17 | 43355405 | 7 | 0.0207   |
| SNP17-43355405 | SP2      | 17 | 43355405 | 8 | 6.811776 |
| rs11079804     | PNPO     | 17 | 43375697 | 2 | 5.541673 |
| rs12936731     | NFE2L1   | 17 | 43483358 | 8 | 7.733629 |
| rs12936731     | NFE2L1   | 17 | 43483358 | 6 | 0.14606  |
| GA014554       | NFE2L1   | 17 | 43492904 | 6 | 11.63232 |
| rs4794453      | SNX11    | 17 | 43539925 | 6 | 1.122144 |
| rs4794453      | SNX11    | 17 | 43539925 | 8 | 1.01588  |
| rs7222136      | SNX11    | 17 | 43554591 | 8 | 6.617226 |
| rs7222136      | SNX11    | 17 | 43554591 | 6 | 8.475531 |
| rs2278868      | SKAP1    | 17 | 43617170 | 8 | 0.407138 |
| rs2278868      | SKAP1    | 17 | 43617170 | 7 | 5.290208 |
| rs12939811     | HOXB1    | 17 | 43962957 | 7 | 0.416339 |
| rs7406910      | HOXB7    | 17 | 44043255 | 4 | 1.589092 |
| rs1054072      | PRAC     | 17 | 44154811 | 1 | 1.895998 |
| rs1054072      | PRAC     | 17 | 44154811 | 3 | 0.383674 |
| rs1054072      | PRAC     | 17 | 44154811 | 6 | 2.248726 |
| rs8556         | HOXB13   | 17 | 44160589 | 7 | 0.052863 |
| rs2271890      | TTLL6    | 17 | 44194911 | 3 | 0.211942 |
| rs1422645      | CALCOCO2 | 17 | 44294657 | 1 | 4.736338 |
| rs1422645      | CALCOCO2 | 17 | 44294657 | 3 | 0.315209 |
| rs11434        | CALCOCO2 | 17 | 44296244 | 3 | 0.009293 |
| rs2270576      | SNF8     | 17 | 44362962 | 1 | 5.525173 |
| rs2270576      | SNF8     | 17 | 44362962 | 3 | 0.641018 |
| rs3744085      | IGF2BP1  | 17 | 44486900 | 4 | 4.709804 |
| rs3744085      | IGF2BP1  | 17 | 44486900 | 7 | 0.245414 |
| rs6504593      | IGF2BP1  | 17 | 44487818 | 7 | 0.06351  |
| rs596783       | FLJ40194 | 17 | 44684704 | 7 | 2.42691  |
| rs596783       | FLJ40194 | 17 | 44684704 | 5 | 1.40127  |
| rs596783       | FLJ40194 | 17 | 44684704 | 4 | 2.091037 |
| rs2906100      | ZNF652   | 17 | 44727763 | 7 | 0.665611 |
| rs11079869     | ZNF652   | 17 | 44728416 | 5 | 0.674386 |
| rs11079869     | ZNF652   | 17 | 44728416 | 4 | 0.048665 |
| rs11079869     | ZNF652   | 17 | 44728416 | 7 | 0.443078 |
| rs11466155     | NGFR     | 17 | 44942999 | 6 | 0.465918 |
| rs741072       | NGFR     | 17 | 44946702 | 2 | 3.302836 |
| rs741072       | NGFR     | 17 | 44946702 | 1 | 1.207908 |
| rs741072       | NGFR     | 17 | 44946702 | 8 | 5.844885 |
| rs741072       | NGFR     | 17 | 44946702 | 4 | 0.036138 |
| rs11466173     | NGFR     | 17 | 44947200 | 6 | 0.833556 |
| rs2676793      | NXP3     | 17 | 45012187 | 6 | 2.826261 |
| rs2676793      | NXP3     | 17 | 45012187 | 4 | 2.311853 |
| rs2676793      | NXP3     | 17 | 45012187 | 2 | 1.619241 |
| rs2676793      | NXP3     | 17 | 45012187 | 5 | 2.5088   |
| rs8186         | SLC35B1  | 17 | 45133792 | 6 | 3.320365 |

|                |         |    |          |   |          |
|----------------|---------|----|----------|---|----------|
| rs1135034      | SLC35B1 | 17 | 45138662 | 3 | 0.131493 |
| rs1135034      | SLC35B1 | 17 | 45138662 | 8 | 6.827728 |
| rs1058564      | DLX4    | 17 | 45406771 | 4 | 7.722125 |
| rs1058564      | DLX4    | 17 | 45406771 | 3 | 0.858721 |
| rs1058564      | DLX4    | 17 | 45406771 | 7 | 2.985608 |
| rs1058564      | DLX4    | 17 | 45406771 | 1 | 4.93739  |
| rs2278163      | DLX3    | 17 | 45427425 | 1 | 1.43593  |
| rs2278163      | DLX3    | 17 | 45427425 | 4 | 2.309384 |
| rs2278163      | DLX3    | 17 | 45427425 | 2 | 1.396114 |
| SNP17-45510424 | ITGA3   | 17 | 45510424 | 7 | 1.566735 |
| rs3744538      | ITGA3   | 17 | 45521979 | 7 | 0.224975 |
| rs3178055      | PDK2    | 17 | 45529907 | 7 | 0.046631 |
| rs3178055      | PDK2    | 17 | 45529907 | 2 | 4.638909 |
| rs3178055      | PDK2    | 17 | 45529907 | 5 | 0.258685 |
| rs1800215      | COL1A1  | 17 | 45620494 | 8 | 2.513106 |
| rs1969513      | TMEM92  | 17 | 45712299 | 4 | 1.189058 |
| rs1969513      | TMEM92  | 17 | 45712299 | 2 | 3.210782 |
| rs2272380      | TMEM92  | 17 | 45713446 | 8 | 4.79407  |
| rs2272380      | TMEM92  | 17 | 45713446 | 1 | 5.442328 |
| SNP17-45788305 | XYLT2   | 17 | 45788305 | 1 | 5.687908 |
| rs6504649      | XYLT2   | 17 | 45792455 | 3 | 0.221341 |
| rs6504649      | XYLT2   | 17 | 45792455 | 5 | 0.63137  |
| rs6504649      | XYLT2   | 17 | 45792455 | 7 | 1.159729 |
| rs6504649      | XYLT2   | 17 | 45792455 | 4 | 1.615645 |
| rs6504649      | XYLT2   | 17 | 45792455 | 2 | 4.84678  |
| rs6504649      | XYLT2   | 17 | 45792455 | 8 | 6.677778 |
| rs7212696      | MRPL27  | 17 | 45801906 | 1 | 5.178028 |
| rs4793651      | MRPL27  | 17 | 45802124 | 4 | 0.353579 |
| rs4793651      | MRPL27  | 17 | 45802124 | 1 | 4.23726  |
| rs4793651      | MRPL27  | 17 | 45802124 | 8 | 4.585001 |
| rs16948970     | MRPL27  | 17 | 45805535 | 1 | 3.286819 |
| SNP17-45807775 | EME1    | 17 | 45807775 | 6 | 2.092723 |
| SNP17-45807775 | EME1    | 17 | 45807775 | 5 | 0.5963   |
| rs2189712      | EME1    | 17 | 45810984 | 4 | 0.677229 |
| rs2189712      | EME1    | 17 | 45810984 | 7 | 0.522925 |
| rs2189712      | EME1    | 17 | 45810984 | 1 | 6.068887 |
| rs2189712      | EME1    | 17 | 45810984 | 8 | 0.130037 |
| rs17714940     | EME1    | 17 | 45811250 | 1 | 5.472209 |
| rs2305998      | ACSF2   | 17 | 45904790 | 4 | 0.852014 |
| rs2305998      | ACSF2   | 17 | 45904790 | 7 | 0.138705 |
| rs2305998      | ACSF2   | 17 | 45904790 | 6 | 0.473974 |
| rs7627         | ACSF2   | 17 | 45907153 | 6 | 2.518203 |
| rs2290862      | RSAD1   | 17 | 45912325 | 1 | 0.501    |
| rs2290862      | RSAD1   | 17 | 45912325 | 7 | 1.335009 |
| rs2290862      | RSAD1   | 17 | 45912325 | 4 | 0.374057 |
| rs3744531      | RSAD1   | 17 | 45918171 | 1 | 4.05035  |
| rs557          | RSAD1   | 17 | 45918233 | 6 | 0.943166 |

|                |           |    |          |   |          |
|----------------|-----------|----|----------|---|----------|
| rs557          | RSAD1     | 17 | 45918233 | 1 | 4.941356 |
| rs9890721      | MYCBPAP   | 17 | 45958502 | 3 | 1.09982  |
| rs9890721      | MYCBPAP   | 17 | 45958502 | 8 | 2.90603  |
| rs9890721      | MYCBPAP   | 17 | 45958502 | 6 | 2.553574 |
| rs9890721      | MYCBPAP   | 17 | 45958502 | 2 | 2.930337 |
| rs9890721      | MYCBPAP   | 17 | 45958502 | 4 | 1.630976 |
| rs1064055      | MYCBPAP   | 17 | 45963716 | 5 | 0.165303 |
| rs4148416      | ABCC3     | 17 | 46108422 | 1 | 3.429284 |
| rs11568591     | ABCC3     | 17 | 46116052 | 7 | 0.263219 |
| rs2302285      | SPAG9     | 17 | 46432038 | 5 | 0.068462 |
| rs7222463      | MBTD1     | 17 | 46624365 | 3 | 0.201046 |
| rs7222463      | MBTD1     | 17 | 46624365 | 6 | 1.781169 |
| rs7222463      | MBTD1     | 17 | 46624365 | 5 | 0.698057 |
| rs2318789      | UTP18     | 17 | 46705801 | 1 | 1.065937 |
| rs2318789      | UTP18     | 17 | 46705801 | 5 | 1.061804 |
| rs2318789      | UTP18     | 17 | 46705801 | 6 | 2.158707 |
| rs2318789      | UTP18     | 17 | 46705801 | 3 | 0.636485 |
| rs244300       | STXBP4    | 17 | 50594239 | 1 | 5.63907  |
| rs244300       | STXBP4    | 17 | 50594239 | 4 | 0.731597 |
| rs244300       | STXBP4    | 17 | 50594239 | 6 | 3.297695 |
| rs244298       | STXBP4    | 17 | 50596386 | 6 | 3.585649 |
| rs244298       | STXBP4    | 17 | 50596386 | 1 | 7.586666 |
| rs244298       | STXBP4    | 17 | 50596386 | 5 | 0.7742   |
| rs244298       | STXBP4    | 17 | 50596386 | 4 | 0.202735 |
| rs957724       | ANKFN1    | 17 | 51805037 | 3 | 0.203644 |
| rs957724       | ANKFN1    | 17 | 51805037 | 7 | 0.219412 |
| rs957724       | ANKFN1    | 17 | 51805037 | 1 | 3.118708 |
| rs8069322      | ANKFN1    | 17 | 51805133 | 1 | 3.195054 |
| rs8069322      | ANKFN1    | 17 | 51805133 | 3 | 0.802276 |
| SNP17-52227438 | C17orf67  | 17 | 52227438 | 3 | 0.255252 |
| rs3760158      | DGKE      | 17 | 52276493 | 2 | 5.144587 |
| rs3760158      | DGKE      | 17 | 52276493 | 8 | 1.479443 |
| rs9897759      | DGKE      | 17 | 52295915 | 8 | 0.476725 |
| rs9897759      | DGKE      | 17 | 52295915 | 2 | 5.839307 |
| rs9897759      | DGKE      | 17 | 52295915 | 7 | 0.892287 |
| rs3213728      | RNF126P1  | 17 | 52478747 | 5 | 0.019724 |
| rs3213728      | RNF126P1  | 17 | 52478747 | 4 | 0.283701 |
| rs3213728      | RNF126P1  | 17 | 52478747 | 7 | 0.444637 |
| rs1468753      | LOC729417 | 17 | 52517324 | 6 | 7.250982 |
| rs17761023     | AKAP1     | 17 | 52537877 | 5 | 0.075092 |
| rs17762338     | CUEDC1    | 17 | 53306036 | 3 | 0.071059 |
| rs17762338     | CUEDC1    | 17 | 53306036 | 1 | 6.815725 |
| rs16942650     | LOC729460 | 17 | 53517798 | 6 | 0.982428 |
| rs16942650     | LOC729460 | 17 | 53517798 | 7 | 1.132178 |
| rs16942650     | LOC729460 | 17 | 53517798 | 8 | 1.607573 |
| rs9912728      | OR4D2     | 17 | 53602453 | 1 | 0.998018 |
| rs9894859      | OR4D2     | 17 | 53603471 | 5 | 1.938232 |

|            |           |    |          |   |          |
|------------|-----------|----|----------|---|----------|
| rs12602891 | EPX       | 17 | 53625120 | 5 | 0.202915 |
| rs2240815  | EPX       | 17 | 53627389 | 3 | 2.714604 |
| rs2301870  | LPO       | 17 | 53687326 | 3 | 0.761577 |
| rs2759     | MPO       | 17 | 53703105 | 1 | 1.7733   |
| rs2680689  | BZRAP1    | 17 | 53741117 | 3 | 2.070964 |
| rs9905604  | BZRAP1    | 17 | 53744630 | 6 | 6.361344 |
| rs2070107  | SUPT4H1   | 17 | 53778200 | 7 | 0.808444 |
| rs2680701  | RNF43     | 17 | 53793300 | 3 | 2.597507 |
| rs3803752  | HSF5      | 17 | 53895266 | 5 | 0.053581 |
| rs3744108  | MTMR4     | 17 | 53940871 | 7 | 9.357398 |
| rs17822735 | C17orf47  | 17 | 53975166 | 7 | 1.009966 |
| rs6503867  | C17orf47  | 17 | 53976358 | 3 | 0.753211 |
| rs6503867  | C17orf47  | 17 | 53976358 | 5 | 0.598097 |
| rs7225128  | TEX14     | 17 | 53991853 | 5 | 0.688966 |
| rs7225128  | TEX14     | 17 | 53991853 | 8 | 0.415132 |
| rs7225128  | TEX14     | 17 | 53991853 | 3 | 1.421737 |
| rs9903050  | TEX14     | 17 | 53991907 | 3 | 0.980126 |
| rs34818467 | TEX14     | 17 | 53998108 | 5 | 1.001641 |
| rs3809724  | PPM1E     | 17 | 54416020 | 5 | 0.513426 |
| rs3809723  | PPM1E     | 17 | 54416760 | 5 | 0.164836 |
| rs3809723  | PPM1E     | 17 | 54416760 | 8 | 3.058869 |
| rs6503905  | C17orf71  | 17 | 54642236 | 7 | 0.553947 |
| rs6503905  | C17orf71  | 17 | 54642236 | 6 | 1.005885 |
| rs10853012 | YPEL2     | 17 | 54833058 | 4 | 0.235745 |
| rs10853012 | YPEL2     | 17 | 54833058 | 1 | 0.707785 |
| rs10853012 | YPEL2     | 17 | 54833058 | 2 | 7.825541 |
| rs1057987  | TBX2      | 17 | 56840337 | 7 | 0.475204 |
| rs1057987  | TBX2      | 17 | 56840337 | 5 | 1.411483 |
| rs1057987  | TBX2      | 17 | 56840337 | 1 | 0.869181 |
| rs11871637 | C17orf82  | 17 | 56845017 | 8 | 0.147297 |
| rs11871637 | C17orf82  | 17 | 56845017 | 5 | 0.074536 |
| rs11871637 | C17orf82  | 17 | 56845017 | 7 | 0.745895 |
| rs3744447  | TBX4      | 17 | 56889769 | 7 | 0.133471 |
| rs3744438  | TBX4      | 17 | 56912382 | 3 | 0.561568 |
| rs7218485  | TBX4      | 17 | 56915245 | 3 | 0.144719 |
| rs7213430  | BRIP1     | 17 | 57114956 | 1 | 5.436913 |
| rs7213430  | BRIP1     | 17 | 57114956 | 6 | 0.075936 |
| rs7213430  | BRIP1     | 17 | 57114956 | 7 | 0.476487 |
| rs7213430  | BRIP1     | 17 | 57114956 | 4 | 1.998259 |
| rs4986763  | BRIP1     | 17 | 57115778 | 7 | 0.061877 |
| rs4986763  | BRIP1     | 17 | 57115778 | 4 | 0.401388 |
| rs4986763  | BRIP1     | 17 | 57115778 | 1 | 4.619082 |
| rs12325728 | LOC645804 | 17 | 57679230 | 1 | 3.073544 |
| rs12325728 | LOC645804 | 17 | 57679230 | 6 | 2.087849 |
| rs12325728 | LOC645804 | 17 | 57679230 | 4 | 1.996274 |
| rs8078132  | TLK2      | 17 | 58037235 | 3 | 0.888982 |
| rs8078132  | TLK2      | 17 | 58037235 | 4 | 0.361056 |

|                |         |    |          |   |          |
|----------------|---------|----|----------|---|----------|
| rs8078132      | TLK2    | 17 | 58037235 | 5 | 0.056431 |
| rs2014055      | MRC2    | 17 | 58095649 | 3 | 0.731636 |
| rs2041283      | 10-Mar  | 17 | 58167359 | 2 | 1.703437 |
| rs2041283      | 10-Mar  | 17 | 58167359 | 7 | 2.021693 |
| rs2041283      | 10-Mar  | 17 | 58167359 | 3 | 0.829722 |
| rs2041283      | 10-Mar  | 17 | 58167359 | 5 | 1.910884 |
| SNP17-58168005 | 10-Mar  | 17 | 58168005 | 2 | 3.427769 |
| SNP17-58168005 | 10-Mar  | 17 | 58168005 | 5 | 2.378258 |
| SNP17-58168005 | 10-Mar  | 17 | 58168005 | 3 | 0.44434  |
| SNP17-58168005 | 10-Mar  | 17 | 58168005 | 7 | 0.915414 |
| rs4298         | ACE     | 17 | 58910932 | 7 | 12.20508 |
| rs4298         | ACE     | 17 | 58910932 | 6 | 6.381345 |
| rs4316         | ACE     | 17 | 58916041 | 1 | 0.484325 |
| rs4316         | ACE     | 17 | 58916041 | 5 | 0.285188 |
| rs4343         | ACE     | 17 | 58919763 | 1 | 3.756113 |
| rs4343         | ACE     | 17 | 58919763 | 5 | 5.09827  |
| rs4343         | ACE     | 17 | 58919763 | 6 | 1.08508  |
| rs4343         | ACE     | 17 | 58919763 | 4 | 0.857161 |
| rs7225568      | KCNH6   | 17 | 58965155 | 6 | 0.610156 |
| rs7225568      | KCNH6   | 17 | 58965155 | 1 | 0.914009 |
| rs7225568      | KCNH6   | 17 | 58965155 | 3 | 0.587748 |
| SNP17-58976784 | KCNH6   | 17 | 58976784 | 1 | 1.060052 |
| rs15637        | MAP3K3  | 17 | 59125782 | 7 | 0.10239  |
| rs15637        | MAP3K3  | 17 | 59125782 | 1 | 0.36235  |
| rs15637        | MAP3K3  | 17 | 59125782 | 4 | 5.769224 |
| rs15637        | MAP3K3  | 17 | 59125782 | 2 | 0.354107 |
| rs15637        | MAP3K3  | 17 | 59125782 | 8 | 0.930729 |
| rs968719       | PSMC5   | 17 | 59262003 | 8 | 4.938644 |
| rs968719       | PSMC5   | 17 | 59262003 | 6 | 5.032647 |
| rs6919         | SMARCD2 | 17 | 59263217 | 2 | 6.107662 |
| rs6919         | SMARCD2 | 17 | 59263217 | 6 | 0.970918 |
| rs7921         | CD79B   | 17 | 59359991 | 4 | 0.01     |
| rs7921         | CD79B   | 17 | 59359991 | 2 | 4.362677 |
| rs7921         | CD79B   | 17 | 59359991 | 1 | 0.273257 |
| rs12603821     | CD79B   | 17 | 59360164 | 2 | 2.558591 |
| rs12603821     | CD79B   | 17 | 59360164 | 6 | 0.028573 |
| rs1051688      | CD79B   | 17 | 59360165 | 6 | 5.308241 |
| rs1051688      | CD79B   | 17 | 59360165 | 7 | 2.679382 |
| rs1051684      | CD79B   | 17 | 59360229 | 6 | 2.78072  |
| rs1051684      | CD79B   | 17 | 59360229 | 7 | 0.227938 |
| rs1051684      | CD79B   | 17 | 59360229 | 1 | 4.879024 |
| rs2058194      | SCN4A   | 17 | 59374080 | 7 | 1.399753 |
| rs2058194      | SCN4A   | 17 | 59374080 | 1 | 1.029986 |
| rs6504191      | SCN4A   | 17 | 59394800 | 5 | 1.985502 |
| rs6504191      | SCN4A   | 17 | 59394800 | 2 | 1.315751 |
| rs196912       | ERN1    | 17 | 59475212 | 5 | 5.91878  |
| rs196912       | ERN1    | 17 | 59475212 | 7 | 0.444072 |



|                |           |    |          |   |          |
|----------------|-----------|----|----------|---|----------|
| rs196912       | ERN1      | 17 | 59475212 | 4 | 0.570743 |
| rs6808         | PECAM1    | 17 | 59754307 | 6 | 0.870316 |
| rs6808         | PECAM1    | 17 | 59754307 | 8 | 0.74661  |
| rs6808         | PECAM1    | 17 | 59754307 | 1 | 3.255683 |
| rs6808         | PECAM1    | 17 | 59754307 | 7 | 10.14398 |
| rs6808         | PECAM1    | 17 | 59754307 | 5 | 0.3657   |
| rs2812         | PECAM1    | 17 | 59754850 | 1 | 5.032723 |
| rs2812         | PECAM1    | 17 | 59754850 | 6 | 1.815238 |
| rs2812         | PECAM1    | 17 | 59754850 | 7 | 3.82452  |
| rs2812         | PECAM1    | 17 | 59754850 | 5 | 3.865531 |
| rs2812         | PECAM1    | 17 | 59754850 | 8 | 0.551871 |
| rs2812         | PECAM1    | 17 | 59754850 | 4 | 0.018546 |
| rs1131012      | PECAM1    | 17 | 59781521 | 5 | 0.055505 |
| SNP17-59787297 | PECAM1    | 17 | 59787297 | 8 | 1.112969 |
| SNP17-59787297 | PECAM1    | 17 | 59787297 | 7 | 1.079133 |
| SNP17-59787297 | PECAM1    | 17 | 59787297 | 5 | 1.222771 |
| rs9303474      | SMURF2    | 17 | 59971771 | 2 | 4.126727 |
| rs9303474      | SMURF2    | 17 | 59971771 | 6 | 0.592271 |
| rs7591         | AXIN2     | 17 | 60955544 | 5 | 0.624908 |
| rs7591         | AXIN2     | 17 | 60955544 | 7 | 0.388135 |
| rs7591         | AXIN2     | 17 | 60955544 | 3 | 0.040715 |
| rs7591         | AXIN2     | 17 | 60955544 | 4 | 2.251054 |
| rs2240308      | AXIN2     | 17 | 60985053 | 3 | 0.602818 |
| rs8178822      | APOH      | 17 | 61655991 | 3 | 1.636571 |
| rs7220996      | PRKCA     | 17 | 62235162 | 4 | 2.831062 |
| rs11652480     | CACNG5    | 17 | 62304014 | 7 | 1.083325 |
| rs2286678      | CACNG5    | 17 | 62311537 | 3 | 0.472843 |
| rs11649752     | CACNG4    | 17 | 62457348 | 1 | 5.019163 |
| rs11649752     | CACNG4    | 17 | 62457348 | 7 | 0.679781 |
| rs11649752     | CACNG4    | 17 | 62457348 | 5 | 0.539951 |
| rs11649752     | CACNG4    | 17 | 62457348 | 3 | 1.619246 |
| rs1799938      | CACNG1    | 17 | 62482766 | 3 | 0.065905 |
| rs2684         | CACNG1    | 17 | 62483067 | 3 | 0.062649 |
| rs8080100      | HELZ      | 17 | 62642504 | 4 | 0.398188 |
| rs8080100      | HELZ      | 17 | 62642504 | 3 | 0.083785 |
| rs8080100      | HELZ      | 17 | 62642504 | 7 | 0.47012  |
| rs11079691     | PSMD12    | 17 | 62793014 | 6 | 3.13679  |
| rs11079691     | PSMD12    | 17 | 62793014 | 1 | 4.168725 |
| rs11079691     | PSMD12    | 17 | 62793014 | 7 | 1.612618 |
| rs8866         | LOC729822 | 17 | 62804441 | 1 | 5.149526 |
| rs8866         | LOC729822 | 17 | 62804441 | 3 | 0.678348 |
| rs2291284      | NOL11     | 17 | 63147987 | 6 | 0.452859 |
| rs12945591     | LOC727804 | 17 | 63714376 | 7 | 2.572572 |
| rs12945591     | LOC727804 | 17 | 63714376 | 2 | 3.037448 |
| rs12945591     | LOC727804 | 17 | 63714376 | 1 | 3.593695 |
| rs3760274      | LOC727804 | 17 | 63714674 | 5 | 1.380333 |
| rs3760274      | LOC727804 | 17 | 63714674 | 3 | 0.121909 |

|                |           |    |          |   |          |
|----------------|-----------|----|----------|---|----------|
| rs3760274      | LOC727804 | 17 | 63714674 | 1 | 0.962008 |
| rs3760274      | LOC727804 | 17 | 63714674 | 2 | 1.149019 |
| rs3764855      | AMZ2      | 17 | 63756173 | 8 | 6.435171 |
| rs3764855      | AMZ2      | 17 | 63756173 | 2 | 5.892256 |
| rs3764855      | AMZ2      | 17 | 63756173 | 1 | 0.435586 |
| rs3213690      | AMZ2      | 17 | 63758011 | 1 | 0.576756 |
| rs3213690      | AMZ2      | 17 | 63758011 | 2 | 0.620979 |
| rs3744307      | SLC16A6   | 17 | 63779245 | 8 | 0.936794 |
| rs3744307      | SLC16A6   | 17 | 63779245 | 3 | 1.160571 |
| rs35397826     | SLC16A6   | 17 | 63781677 | 8 | 0.067844 |
| rs35397826     | SLC16A6   | 17 | 63781677 | 3 | 1.627982 |
| rs1558876      | ARSG      | 17 | 63876286 | 4 | 2.982106 |
| rs1558877      | ARSG      | 17 | 63876344 | 6 | 0.27483  |
| SNP17-63927952 | ARSG      | 17 | 63927952 | 1 | 4.570214 |
| SNP17-63927952 | ARSG      | 17 | 63927952 | 7 | 0.254906 |
| SNP17-63927952 | ARSG      | 17 | 63927952 | 3 | 0.381749 |
| rs883541       | WIPI1     | 17 | 63960717 | 6 | 0.140689 |
| rs8080306      | PRKAR1A   | 17 | 64019838 | 4 | 3.647845 |
| rs8080306      | PRKAR1A   | 17 | 64019838 | 3 | 0.321297 |
| rs2302234      | FAM20A    | 17 | 64049834 | 4 | 0.389055 |
| rs2302234      | FAM20A    | 17 | 64049834 | 6 | 0.563366 |
| rs2286562      | FAM20A    | 17 | 64051442 | 1 | 3.945822 |
| rs2286562      | FAM20A    | 17 | 64051442 | 6 | 1.307363 |
| rs3826430      | ABCA8     | 17 | 64440029 | 3 | 0.628309 |
| rs11077858     | ABCA9     | 17 | 64483170 | 3 | 0.682869 |
| rs11077858     | ABCA9     | 17 | 64483170 | 1 | 0.324533 |
| rs11077859     | ABCA9     | 17 | 64483474 | 3 | 1.339765 |
| rs11077859     | ABCA9     | 17 | 64483474 | 1 | 1.015795 |
| rs11077860     | ABCA9     | 17 | 64483493 | 3 | 1.01942  |
| rs11077860     | ABCA9     | 17 | 64483493 | 1 | 0.636101 |
| rs2302294      | ABCA9     | 17 | 64497587 | 1 | 0.350802 |
| rs2302291      | ABCA9     | 17 | 64539855 | 3 | 0.677079 |
| SNP17-64621428 | ABCA6     | 17 | 64621428 | 5 | 0.306566 |
| rs4968843      | ABCA10    | 17 | 64655792 | 3 | 0.308209 |
| rs4968843      | ABCA10    | 17 | 64655792 | 8 | 0.50949  |
| rs4968843      | ABCA10    | 17 | 64655792 | 1 | 4.147153 |
| rs2233767      | ABCA10    | 17 | 64655990 | 5 | 2.861985 |
| rs2233767      | ABCA10    | 17 | 64655990 | 7 | 0.652124 |
| rs10491178     | ABCA10    | 17 | 64661568 | 5 | 0.026653 |
| rs11657804     | ABCA10    | 17 | 64722587 | 1 | 0.078179 |
| rs9909216      | ABCA10    | 17 | 64724018 | 3 | 0.596847 |
| rs9909216      | ABCA10    | 17 | 64724018 | 1 | 2.688592 |
| rs9909216      | ABCA10    | 17 | 64724018 | 5 | 0.565504 |
| rs12941264     | ABCA10    | 17 | 64727307 | 1 | 1.502672 |
| rs9302891      | ABCA10    | 17 | 64736442 | 4 | 0.022948 |
| rs15886        | ABCA5     | 17 | 64754884 | 5 | 0.210942 |
| rs15886        | ABCA5     | 17 | 64754884 | 8 | 0.302786 |

|            |           |    |          |   |          |
|------------|-----------|----|----------|---|----------|
| rs6788     | KCNJ16    | 17 | 65643121 | 1 | 0.662315 |
| rs6788     | KCNJ16    | 17 | 65643121 | 3 | 0.0282   |
| rs173135   | KCNJ2     | 17 | 65683921 | 3 | 1.12615  |
| rs173135   | KCNJ2     | 17 | 65683921 | 2 | 4.925683 |
| rs236514   | KCNJ2     | 17 | 65685326 | 3 | 0.229951 |
| rs236514   | KCNJ2     | 17 | 65685326 | 7 | 0.577167 |
| rs236514   | KCNJ2     | 17 | 65685326 | 4 | 3.795695 |
| rs1042678  | SOX9      | 17 | 67633703 | 2 | 0.08463  |
| rs1042678  | SOX9      | 17 | 67633703 | 6 | 8.114104 |
| rs1042678  | SOX9      | 17 | 67633703 | 5 | 1.578749 |
| rs9898179  | LOC727973 | 17 | 67729080 | 1 | 3.55135  |
| rs9898179  | LOC727973 | 17 | 67729080 | 3 | 0.220098 |
| rs9898179  | LOC727973 | 17 | 67729080 | 6 | 3.180427 |
| rs9898179  | LOC727973 | 17 | 67729080 | 4 | 0.370927 |
| rs1126966  | SLC39A11  | 17 | 68154371 | 2 | 1.053154 |
| rs7210080  | SSTR2     | 17 | 68678697 | 4 | 0.597282 |
| rs7210080  | SSTR2     | 17 | 68678697 | 2 | 0.568905 |
| rs7210080  | SSTR2     | 17 | 68678697 | 1 | 1.115606 |
| rs745142   | C17orf80  | 17 | 68744476 | 4 | 0.418698 |
| rs745142   | C17orf80  | 17 | 68744476 | 1 | 6.679134 |
| rs745142   | C17orf80  | 17 | 68744476 | 7 | 1.58361  |
| rs745142   | C17orf80  | 17 | 68744476 | 8 | 0.875594 |
| rs11869253 | C17orf80  | 17 | 68744725 | 4 | 1.234179 |
| rs11869253 | C17orf80  | 17 | 68744725 | 1 | 2.769293 |
| rs11869253 | C17orf80  | 17 | 68744725 | 8 | 0.603921 |
| rs11869253 | C17orf80  | 17 | 68744725 | 7 | 1.053371 |
| rs3195419  | SDK2      | 17 | 68845849 | 6 | 1.754583 |
| rs3195419  | SDK2      | 17 | 68845849 | 3 | 0.771734 |
| rs3195419  | SDK2      | 17 | 68845849 | 4 | 1.752138 |
| rs2270716  | SDK2      | 17 | 68891682 | 1 | 3.25981  |
| rs9302962  | SDK2      | 17 | 68909765 | 8 | 7.26154  |
| rs9302962  | SDK2      | 17 | 68909765 | 7 | 6.890315 |
| rs9302962  | SDK2      | 17 | 68909765 | 6 | 0.531136 |
| rs12386051 | SDK2      | 17 | 68922486 | 5 | 0.904854 |
| rs1105354  | SDK2      | 17 | 68938265 | 3 | 0.199545 |
| rs1105354  | SDK2      | 17 | 68938265 | 7 | 0.63401  |
| rs1105354  | SDK2      | 17 | 68938265 | 4 | 0.135858 |
| rs16977768 | C17orf54  | 17 | 69257971 | 8 | 1.834175 |
| rs2683163  | C17orf54  | 17 | 69258074 | 5 | 0.365055 |
| rs2683163  | C17orf54  | 17 | 69258074 | 1 | 0.258514 |
| rs2683163  | C17orf54  | 17 | 69258074 | 3 | 0.18229  |
| rs2683163  | C17orf54  | 17 | 69258074 | 6 | 1.897715 |
| rs2683163  | C17orf54  | 17 | 69258074 | 4 | 0.551692 |
| rs35682745 | TTYH2     | 17 | 69751763 | 5 | 0.529563 |
| rs3897753  | TTYH2     | 17 | 69757696 | 3 | 0.703142 |
| rs3897753  | TTYH2     | 17 | 69757696 | 1 | 3.050471 |
| rs12600564 | TTYH2     | 17 | 69760107 | 5 | 0.489249 |

|                |           |    |          |   |          |
|----------------|-----------|----|----------|---|----------|
| rs9899862      | TTYH2     | 17 | 69760824 | 3 | 0.457784 |
| rs34159194     | DNAI2     | 17 | 69807561 | 1 | 1.231185 |
| rs34159194     | DNAI2     | 17 | 69807561 | 8 | 2.729641 |
| rs1699597      | LOC441800 | 17 | 70077946 | 8 | 1.829095 |
| rs7212069      | C17orf77  | 17 | 70092709 | 7 | 1.216471 |
| rs7212069      | C17orf77  | 17 | 70092709 | 3 | 0.315586 |
| rs493430       | C17orf77  | 17 | 70099921 | 8 | 0.559085 |
| rs545652       | C17orf77  | 17 | 70100401 | 7 | 0.321696 |
| rs12949223     | C17orf77  | 17 | 70100859 | 1 | 0.208151 |
| rs553781       | C17orf77  | 17 | 70101862 | 1 | 4.487847 |
| rs3178300      | RAB37     | 17 | 70254715 | 8 | 0.236408 |
| rs3178300      | RAB37     | 17 | 70254715 | 4 | 0.557409 |
| rs3178300      | RAB37     | 17 | 70254715 | 3 | 0.831187 |
| rs3178300      | RAB37     | 17 | 70254715 | 5 | 0.769466 |
| rs3178300      | RAB37     | 17 | 70254715 | 6 | 3.170358 |
| rs1054131      | RAB37     | 17 | 70254797 | 6 | 0.956602 |
| rs745666       | SLC9A3R1  | 17 | 70256393 | 8 | 0.214641 |
| rs745666       | SLC9A3R1  | 17 | 70256393 | 2 | 0.327054 |
| rs745666       | SLC9A3R1  | 17 | 70256393 | 4 | 2.144486 |
| rs3744215      | GRIN2C    | 17 | 70350244 | 3 | 0.43328  |
| rs3744215      | GRIN2C    | 17 | 70350244 | 1 | 0.482659 |
| rs690514       | FDXR      | 17 | 70374188 | 3 | 0.065076 |
| rs690514       | FDXR      | 17 | 70374188 | 6 | 0.323104 |
| rs1568448      | USH1G     | 17 | 70423860 | 5 | 1.702935 |
| rs1568448      | USH1G     | 17 | 70423860 | 6 | 0.71553  |
| rs1013013      | USH1G     | 17 | 70424457 | 8 | 0.267355 |
| rs1013013      | USH1G     | 17 | 70424457 | 4 | 0.901023 |
| rs690566       | USH1G     | 17 | 70424667 | 5 | 1.287838 |
| rs690566       | USH1G     | 17 | 70424667 | 6 | 0.409067 |
| rs690566       | USH1G     | 17 | 70424667 | 3 | 2.062873 |
| SNP17-70438718 | OTOP2     | 17 | 70438718 | 3 | 0.338765 |
| SNP17-70438718 | OTOP2     | 17 | 70438718 | 6 | 0.574313 |
| rs9890664      | OTOP3     | 17 | 70449446 | 4 | 0.687478 |
| rs9890664      | OTOP3     | 17 | 70449446 | 7 | 0.00654  |
| rs9890664      | OTOP3     | 17 | 70449446 | 3 | 0.530201 |
| rs9890664      | OTOP3     | 17 | 70449446 | 5 | 0.508299 |
| rs8066909      | OTOP3     | 17 | 70454721 | 7 | 0.995161 |
| rs8066909      | OTOP3     | 17 | 70454721 | 5 | 0.909066 |
| rs2307010      | C17orf28  | 17 | 70460741 | 3 | 0.07148  |
| rs3744198      | C17orf28  | 17 | 70467719 | 7 | 0.098882 |
| SNP17-70511266 | CDR2L     | 17 | 70511266 | 6 | 0.187918 |
| rs34496172     | ICT1      | 17 | 70528084 | 6 | 3.772635 |
| rs4789128      | LOC643177 | 17 | 70582383 | 8 | 0.128218 |
| rs4789128      | LOC643177 | 17 | 70582383 | 7 | 0.245194 |
| rs4412997      | ARMC7     | 17 | 70637369 | 5 | 0.397623 |
| rs2291029      | NUP85     | 17 | 70733034 | 7 | 1.162851 |
| rs3178020      | GGA3      | 17 | 70746423 | 7 | 0.710649 |

|                |          |    |          |   |          |
|----------------|----------|----|----------|---|----------|
| rs16967764     | MIF4GD   | 17 | 70774210 | 7 | 1.865863 |
| rs7198         | SLC25A19 | 17 | 70780853 | 1 | 3.54739  |
| rs7198         | SLC25A19 | 17 | 70780853 | 3 | 0.2575   |
| rs7198         | SLC25A19 | 17 | 70780853 | 6 | 0.538943 |
| rs12949173     | KIAA0195 | 17 | 71005469 | 3 | 0.21074  |
| rs12949173     | KIAA0195 | 17 | 71005469 | 8 | 0.265642 |
| rs12949173     | KIAA0195 | 17 | 71005469 | 7 | 0.187951 |
| rs13357        | KIAA0195 | 17 | 71007287 | 3 | 0.516363 |
| rs13357        | KIAA0195 | 17 | 71007287 | 1 | 4.161189 |
| rs13357        | KIAA0195 | 17 | 71007287 | 6 | 0.135699 |
| rs13357        | KIAA0195 | 17 | 71007287 | 4 | 6.434276 |
| rs13357        | KIAA0195 | 17 | 71007287 | 5 | 10.07093 |
| rs13357        | KIAA0195 | 17 | 71007287 | 8 | 9.19813  |
| rs13357        | KIAA0195 | 17 | 71007287 | 7 | 2.39975  |
| rs4789206      | CASKIN2  | 17 | 71021607 | 1 | 1.293402 |
| rs6501818      | TSEN54   | 17 | 71024884 | 5 | 0.218756 |
| rs6501818      | TSEN54   | 17 | 71024884 | 2 | 4.775302 |
| rs9911502      | TSEN54   | 17 | 71029798 | 2 | 0.595706 |
| rs9911502      | TSEN54   | 17 | 71029798 | 5 | 8.275351 |
| rs9911502      | TSEN54   | 17 | 71029798 | 1 | 0.122176 |
| rs6501820      | TSEN54   | 17 | 71029879 | 6 | 1.744084 |
| rs6501820      | TSEN54   | 17 | 71029879 | 1 | 7.925185 |
| SNP17-71063780 | LLGL2    | 17 | 71063780 | 4 | 0.714289 |
| SNP17-71063780 | LLGL2    | 17 | 71063780 | 8 | 5.249441 |
| SNP17-71063780 | LLGL2    | 17 | 71063780 | 1 | 0.480253 |
| SNP17-71063780 | LLGL2    | 17 | 71063780 | 2 | 0.079386 |
| rs1126939      | LLGL2    | 17 | 71082313 | 2 | 3.052912 |
| rs1126939      | LLGL2    | 17 | 71082313 | 1 | 0.31813  |
| rs1126939      | LLGL2    | 17 | 71082313 | 3 | 0.259481 |
| rs1126939      | LLGL2    | 17 | 71082313 | 8 | 4.396669 |
| rs820242       | NULL     | 17 | 71097953 | 1 | 0.619391 |
| rs820242       | NULL     | 17 | 71097953 | 3 | 0.504067 |
| rs820242       | NULL     | 17 | 71097953 | 4 | 1.161382 |
| rs820242       | NULL     | 17 | 71097953 | 6 | 1.463191 |
| rs820242       | NULL     | 17 | 71097953 | 2 | 2.529341 |
| rs2290455      | NULL     | 17 | 71098863 | 5 | 0.164723 |
| rs936056       | NULL     | 17 | 71099379 | 4 | 0.806882 |
| rs936056       | NULL     | 17 | 71099379 | 8 | 2.724886 |
| rs936056       | NULL     | 17 | 71099379 | 5 | 0.878434 |
| rs3803728      | NULL     | 17 | 71120734 | 3 | 0.623704 |
| rs3803728      | NULL     | 17 | 71120734 | 2 | 1.808352 |
| rs820144       | NULL     | 17 | 71123418 | 1 | 0.739366 |
| rs820144       | NULL     | 17 | 71123418 | 2 | 2.098364 |
| rs820144       | NULL     | 17 | 71123418 | 3 | 1.735776 |
| rs820145       | NULL     | 17 | 71125570 | 3 | 0.470849 |
| rs4788902      | RECQL5   | 17 | 71137025 | 1 | 1.149925 |
| rs4788902      | RECQL5   | 17 | 71137025 | 2 | 0.029825 |

|                |           |    |          |   |          |
|----------------|-----------|----|----------|---|----------|
| rs4788902      | RECQL5    | 17 | 71137025 | 3 | 0.347912 |
| rs820196       | RECQL5    | 17 | 71139134 | 3 | 0.287721 |
| rs1661744      | RECQL5    | 17 | 71158733 | 2 | 4.852022 |
| rs1661744      | RECQL5    | 17 | 71158733 | 3 | 0.046254 |
| rs1661745      | RECQL5    | 17 | 71158734 | 3 | 0.750577 |
| rs7342         | H3F3B     | 17 | 71284451 | 3 | 0.428593 |
| rs9916685      | UNC13D    | 17 | 71335315 | 6 | 0.693379 |
| SNP17-71338800 | UNC13D    | 17 | 71338800 | 2 | 2.242012 |
| SNP17-71338800 | UNC13D    | 17 | 71338800 | 3 | 0.008967 |
| SNP17-71338800 | UNC13D    | 17 | 71338800 | 4 | 0.059709 |
| rs3760128      | TRIM65    | 17 | 71398483 | 3 | 0.300284 |
| rs3760128      | TRIM65    | 17 | 71398483 | 4 | 0.738483 |
| rs34974290     | TRIM65    | 17 | 71399949 | 6 | 6.353087 |
| rs34974290     | TRIM65    | 17 | 71399949 | 4 | 4.335911 |
| rs7219918      | FBF1      | 17 | 71431116 | 6 | 0.97171  |
| rs7218738      | FBF1      | 17 | 71431133 | 6 | 1.18868  |
| rs2305913      | FBF1      | 17 | 71434536 | 8 | 0.659775 |
| rs2305913      | FBF1      | 17 | 71434536 | 4 | 0.547762 |
| rs2305913      | FBF1      | 17 | 71434536 | 3 | 1.085396 |
| SNP17-71445830 | FBF1      | 17 | 71445830 | 8 | 4.554217 |
| rs1137582      | ACOX1     | 17 | 71461135 | 4 | 0.323972 |
| rs1137582      | ACOX1     | 17 | 71461135 | 3 | 0.504551 |
| rs1137582      | ACOX1     | 17 | 71461135 | 8 | 0.716231 |
| rs3744032      | ACOX1     | 17 | 71481430 | 8 | 1.486021 |
| rs2069528      | CDK3      | 17 | 71509069 | 5 | 0.043272 |
| rs2069528      | CDK3      | 17 | 71509069 | 4 | 0.695181 |
| rs2257020      | LGICZ1    | 17 | 71588010 | 8 | 1.898078 |
| rs8836         | EXOC7     | 17 | 71589092 | 7 | 11.48109 |
| rs1043149      | LGICZ1    | 17 | 71589392 | 8 | 2.689503 |
| rs881502       | RNF157    | 17 | 71663961 | 1 | 1.760026 |
| rs881502       | RNF157    | 17 | 71663961 | 5 | 1.667253 |
| rs881502       | RNF157    | 17 | 71663961 | 8 | 2.496993 |
| rs881502       | RNF157    | 17 | 71663961 | 6 | 3.231119 |
| SNP17-71675354 | RNF157    | 17 | 71675354 | 2 | 2.985978 |
| rs2289603      | RNF157    | 17 | 71675416 | 2 | 5.275664 |
| rs6501867      | LOC643159 | 17 | 71733942 | 6 | 3.280994 |
| SNP17-71784894 | QRICH2    | 17 | 71784894 | 4 | 0.810403 |
| rs347675       | QRICH2    | 17 | 71786755 | 7 | 0.48423  |
| rs4789273      | QRICH2    | 17 | 71797677 | 7 | 1.341096 |
| rs4789273      | QRICH2    | 17 | 71797677 | 6 | 1.354995 |
| rs4789273      | QRICH2    | 17 | 71797677 | 4 | 5.023185 |
| rs4789273      | QRICH2    | 17 | 71797677 | 8 | 5.698134 |
| rs4789274      | QRICH2    | 17 | 71797701 | 4 | 1.042499 |
| rs4789274      | QRICH2    | 17 | 71797701 | 7 | 2.485577 |
| rs4789274      | QRICH2    | 17 | 71797701 | 6 | 2.545634 |
| rs2279052      | QRICH2    | 17 | 71798799 | 2 | 4.70307  |
| rs2279052      | QRICH2    | 17 | 71798799 | 7 | 0.401727 |

|                |            |    |          |   |          |
|----------------|------------|----|----------|---|----------|
| rs2279052      | QRICH2     | 17 | 71798799 | 8 | 2.443141 |
| rs2279052      | QRICH2     | 17 | 71798799 | 4 | 0.617261 |
| rs2279052      | QRICH2     | 17 | 71798799 | 6 | 4.315507 |
| rs2279054      | QRICH2     | 17 | 71799189 | 4 | 0.277291 |
| rs2279054      | QRICH2     | 17 | 71799189 | 6 | 0.10229  |
| rs2279054      | QRICH2     | 17 | 71799189 | 7 | 1.11636  |
| rs2279054      | QRICH2     | 17 | 71799189 | 2 | 4.967805 |
| rs2279054      | QRICH2     | 17 | 71799189 | 8 | 2.641381 |
| rs3803737      | QRICH2     | 17 | 71801095 | 4 | 0.954219 |
| rs3803737      | QRICH2     | 17 | 71801095 | 6 | 0.006479 |
| rs3803737      | QRICH2     | 17 | 71801095 | 7 | 0.434339 |
| rs3803737      | QRICH2     | 17 | 71801095 | 2 | 3.020784 |
| rs6501880      | QRICH2     | 17 | 71801300 | 6 | 4.535283 |
| rs6501880      | QRICH2     | 17 | 71801300 | 8 | 3.506782 |
| rs6501880      | QRICH2     | 17 | 71801300 | 7 | 0.37234  |
| rs6501880      | QRICH2     | 17 | 71801300 | 4 | 3.702499 |
| rs6501880      | QRICH2     | 17 | 71801300 | 2 | 3.834601 |
| rs6501881      | QRICH2     | 17 | 71801434 | 6 | 1.384941 |
| rs6501881      | QRICH2     | 17 | 71801434 | 4 | 0.76391  |
| rs6501882      | QRICH2     | 17 | 71801470 | 8 | 0.21896  |
| rs6501882      | QRICH2     | 17 | 71801470 | 7 | 0.767129 |
| rs6501882      | QRICH2     | 17 | 71801470 | 6 | 0.193609 |
| rs6501882      | QRICH2     | 17 | 71801470 | 4 | 1.179975 |
| rs6501882      | QRICH2     | 17 | 71801470 | 2 | 3.385725 |
| rs6501883      | QRICH2     | 17 | 71801503 | 7 | 0.41165  |
| rs6501883      | QRICH2     | 17 | 71801503 | 6 | 0.492832 |
| rs6501883      | QRICH2     | 17 | 71801503 | 4 | 0.898585 |
| rs7225131      | QRICH2     | 17 | 71801692 | 8 | 1.837812 |
| rs7225131      | QRICH2     | 17 | 71801692 | 6 | 0.782748 |
| rs7225131      | QRICH2     | 17 | 71801692 | 2 | 3.689428 |
| rs7225131      | QRICH2     | 17 | 71801692 | 7 | 0.213572 |
| rs7225131      | QRICH2     | 17 | 71801692 | 4 | 3.342571 |
| SNP17-71812092 | QRICH2     | 17 | 71812092 | 4 | 0.417861 |
| SNP17-71893162 | SPHK1      | 17 | 71893162 | 5 | 0.793008 |
| rs346801       | SPHK1      | 17 | 71895273 | 4 | 7.657664 |
| rs8150         | RHBDF2     | 17 | 71978612 | 8 | 5.514733 |
| rs8150         | RHBDF2     | 17 | 71978612 | 3 | 0.261831 |
| rs8150         | RHBDF2     | 17 | 71978612 | 5 | 0.002874 |
| SNP17-71986619 | RHBDF2     | 17 | 71986619 | 4 | 2.119173 |
| SNP17-71986619 | RHBDF2     | 17 | 71986619 | 1 | 3.659013 |
| rs8189         | CYGB       | 17 | 72035386 | 4 | 1.593811 |
| rs8189         | CYGB       | 17 | 72035386 | 5 | 2.193909 |
| rs8189         | CYGB       | 17 | 72035386 | 6 | 3.021794 |
| rs34216716     | CYGB       | 17 | 72038805 | 7 | 0.367978 |
| rs8073763      | ST6GALNAC1 | 17 | 72132893 | 3 | 1.25199  |
| rs8073763      | ST6GALNAC1 | 17 | 72132893 | 7 | 3.06481  |
| rs8073763      | ST6GALNAC1 | 17 | 72132893 | 6 | 4.177603 |

|                |            |    |          |   |          |
|----------------|------------|----|----------|---|----------|
| rs8073763      | ST6GALNAC1 | 17 | 72132893 | 1 | 5.087655 |
| rs8073763      | ST6GALNAC1 | 17 | 72132893 | 5 | 0.027653 |
| rs8073763      | ST6GALNAC1 | 17 | 72132893 | 8 | 0.334669 |
| rs237059       | SFRS2      | 17 | 72242438 | 7 | 0.67488  |
| rs3744061      | SFRS2      | 17 | 72244998 | 2 | 1.587023 |
| rs3744061      | SFRS2      | 17 | 72244998 | 1 | 1.16917  |
| rs3744061      | SFRS2      | 17 | 72244998 | 6 | 0.023511 |
| rs3744061      | SFRS2      | 17 | 72244998 | 7 | 1.214595 |
| rs3744061      | SFRS2      | 17 | 72244998 | 8 | 1.051857 |
| rs11077880     | MGAT5B     | 17 | 72457542 | 5 | 0.480509 |
| rs11077880     | MGAT5B     | 17 | 72457542 | 8 | 3.955455 |
| rs8074685      | MGAT5B     | 17 | 72457881 | 8 | 0.658299 |
| rs8074685      | MGAT5B     | 17 | 72457881 | 6 | 0.208991 |
| rs8074685      | MGAT5B     | 17 | 72457881 | 2 | 1.776058 |
| SNP17-73000379 | 9-Sep      | 17 | 73000379 | 7 | 1.954478 |
| SNP17-73006300 | 9-Sep      | 17 | 73006300 | 3 | 0.013187 |
| rs12449858     | TMC6       | 17 | 73632913 | 1 | 1.487273 |
| rs12449858     | TMC6       | 17 | 73632913 | 8 | 2.797808 |
| rs7208422      | TMC8       | 17 | 73642170 | 7 | 0.032938 |
| rs7208422      | TMC8       | 17 | 73642170 | 4 | 0.224978 |
| rs7208422      | TMC8       | 17 | 73642170 | 8 | 0.493014 |
| rs12452890     | TMC8       | 17 | 73642665 | 7 | 0.830799 |
| rs1079170      | SYNGR2     | 17 | 73678534 | 3 | 1.325365 |
| rs12449983     | SYNGR2     | 17 | 73680452 | 1 | 5.863006 |
| rs1143697      | TK1        | 17 | 73690343 | 1 | 1.153589 |
| rs35330043     | TK1        | 17 | 73690346 | 3 | 0.965227 |
| SNP17-73712560 | AFMID      | 17 | 73712560 | 1 | 4.700935 |
| rs2292642      | PGS1       | 17 | 73907025 | 5 | 0.655654 |
| rs2292642      | PGS1       | 17 | 73907025 | 3 | 1.06713  |
| rs2271613      | DNAH17     | 17 | 73934692 | 1 | 2.686588 |
| SNP17-73945494 | DNAH17     | 17 | 73945494 | 6 | 1.86233  |
| SNP17-73945494 | DNAH17     | 17 | 73945494 | 5 | 0.958722 |
| rs2289751      | DNAH17     | 17 | 73961100 | 2 | 0.704202 |
| rs2289751      | DNAH17     | 17 | 73961100 | 1 | 0.115647 |
| rs2289751      | DNAH17     | 17 | 73961100 | 7 | 0.224919 |
| rs2289754      | DNAH17     | 17 | 73966813 | 8 | 0.450211 |
| rs2289754      | DNAH17     | 17 | 73966813 | 7 | 0.535048 |
| rs691225       | DNAH17     | 17 | 73974365 | 2 | 0.555974 |
| rs691225       | DNAH17     | 17 | 73974365 | 1 | 0.618626 |
| rs691225       | DNAH17     | 17 | 73974365 | 8 | 1.383394 |
| rs691225       | DNAH17     | 17 | 73974365 | 3 | 0.41648  |
| SNP17-74015155 | DNAH17     | 17 | 74015155 | 4 | 1.807254 |
| rs3744793      | USP36      | 17 | 74328685 | 5 | 0.251211 |
| rs3744793      | USP36      | 17 | 74328685 | 3 | 0.25596  |
| rs3744793      | USP36      | 17 | 74328685 | 1 | 0.770508 |
| rs3744793      | USP36      | 17 | 74328685 | 2 | 0.332703 |
| rs3744793      | USP36      | 17 | 74328685 | 4 | 0.135993 |



|                |          |    |          |   |          |
|----------------|----------|----|----------|---|----------|
| rs3744166      | LGALS3BP | 17 | 74482474 | 7 | 1.109501 |
| rs7213410      | C1QTNF1  | 17 | 74542172 | 7 | 0.523403 |
| rs11077409     | C1QTNF1  | 17 | 74554313 | 4 | 0.533072 |
| rs11077409     | C1QTNF1  | 17 | 74554313 | 3 | 0.473423 |
| rs11769        | C1QTNF1  | 17 | 74556996 | 6 | 7.452996 |
| rs11769        | C1QTNF1  | 17 | 74556996 | 8 | 0.533463 |
| rs11769        | C1QTNF1  | 17 | 74556996 | 3 | 0.130036 |
| rs11769        | C1QTNF1  | 17 | 74556996 | 1 | 0.786834 |
| rs11769        | C1QTNF1  | 17 | 74556996 | 4 | 4.142279 |
| rs11769        | C1QTNF1  | 17 | 74556996 | 2 | 0.238349 |
| rs11769        | C1QTNF1  | 17 | 74556996 | 7 | 5.787015 |
| rs3744181      | FLJ21865 | 17 | 74585161 | 3 | 0.524138 |
| rs3744176      | FLJ21865 | 17 | 74595214 | 5 | 0.995871 |
| rs3744176      | FLJ21865 | 17 | 74595214 | 3 | 6.217795 |
| rs3744176      | FLJ21865 | 17 | 74595214 | 8 | 0.709971 |
| rs3744176      | FLJ21865 | 17 | 74595214 | 1 | 1.73458  |
| rs3744176      | FLJ21865 | 17 | 74595214 | 6 | 1.50228  |
| rs3744176      | FLJ21865 | 17 | 74595214 | 4 | 0.555674 |
| rs3744176      | FLJ21865 | 17 | 74595214 | 7 | 0.072652 |
| rs3744176      | FLJ21865 | 17 | 74595214 | 2 | 1.860267 |
| rs11557        | FLJ21865 | 17 | 74596249 | 3 | 0.883525 |
| rs11557        | FLJ21865 | 17 | 74596249 | 1 | 0.576148 |
| rs7217829      | FLJ21865 | 17 | 74596270 | 3 | 1.75201  |
| rs7217829      | FLJ21865 | 17 | 74596270 | 5 | 0.072815 |
| rs7217829      | FLJ21865 | 17 | 74596270 | 6 | 5.121646 |
| rs7217829      | FLJ21865 | 17 | 74596270 | 8 | 7.609342 |
| rs7217829      | FLJ21865 | 17 | 74596270 | 4 | 0.64933  |
| rs7217829      | FLJ21865 | 17 | 74596270 | 2 | 0.656759 |
| rs7217829      | FLJ21865 | 17 | 74596270 | 1 | 0.426944 |
| rs3751956      | CBX2     | 17 | 75373079 | 2 | 1.262163 |
| rs3751956      | CBX2     | 17 | 75373079 | 7 | 0.690032 |
| rs3751956      | CBX2     | 17 | 75373079 | 3 | 0.77199  |
| rs3751956      | CBX2     | 17 | 75373079 | 1 | 0.600536 |
| rs3751956      | CBX2     | 17 | 75373079 | 8 | 2.661534 |
| rs3751957      | CBX2     | 17 | 75373286 | 3 | 1.114922 |
| rs2289530      | CCDC40   | 17 | 75636973 | 3 | 0.097166 |
| rs2289530      | CCDC40   | 17 | 75636973 | 7 | 0.907219 |
| SNP17-75674484 | CCDC40   | 17 | 75674484 | 1 | 3.049921 |
| SNP17-75674484 | CCDC40   | 17 | 75674484 | 5 | 0.402805 |
| rs12952612     | CCDC40   | 17 | 75685647 | 3 | 0.468483 |
| rs12952612     | CCDC40   | 17 | 75685647 | 7 | 0.83938  |
| rs2304854      | CCDC40   | 17 | 75688157 | 2 | 0.797567 |
| rs2304854      | CCDC40   | 17 | 75688157 | 5 | 1.268781 |
| rs2304854      | CCDC40   | 17 | 75688157 | 1 | 0.394586 |
| rs2304854      | CCDC40   | 17 | 75688157 | 3 | 0.086974 |
| rs2304854      | CCDC40   | 17 | 75688157 | 4 | 0.959233 |
| rs2304853      | CCDC40   | 17 | 75688184 | 1 | 1.56319  |

|                |          |    |          |   |          |
|----------------|----------|----|----------|---|----------|
| rs2304853      | CCDC40   | 17 | 75688184 | 5 | 1.18036  |
| rs2304852      | CCDC40   | 17 | 75688318 | 5 | 0.630932 |
| rs2304852      | CCDC40   | 17 | 75688318 | 6 | 1.423374 |
| rs2304851      | CCDC40   | 17 | 75688355 | 6 | 0.555893 |
| rs2304851      | CCDC40   | 17 | 75688355 | 3 | 0.097639 |
| rs2304851      | CCDC40   | 17 | 75688355 | 5 | 0.307591 |
| rs2304851      | CCDC40   | 17 | 75688355 | 1 | 1.707058 |
| rs1126690      | GAA      | 17 | 75706000 | 3 | 0.080712 |
| rs2229221      | GAA      | 17 | 75707816 | 2 | 5.162844 |
| rs2229221      | GAA      | 17 | 75707816 | 1 | 6.633126 |
| rs4889990      | CARD14   | 17 | 75772590 | 2 | 0.16859  |
| rs4889990      | CARD14   | 17 | 75772590 | 1 | 1.726558 |
| SNP17-75786887 | CARD14   | 17 | 75786887 | 5 | 0.545072 |
| rs11652075     | CARD14   | 17 | 75793488 | 1 | 2.721349 |
| rs11652075     | CARD14   | 17 | 75793488 | 7 | 0.377877 |
| SNP17-75933731 | RNF213   | 17 | 75933731 | 8 | 8.306476 |
| SNP17-75933731 | RNF213   | 17 | 75933731 | 2 | 5.584365 |
| SNP17-75933731 | RNF213   | 17 | 75933731 | 3 | 0.242297 |
| rs4890012      | RNF213   | 17 | 75933975 | 2 | 2.633287 |
| rs4890012      | RNF213   | 17 | 75933975 | 8 | 6.505386 |
| SNP17-75952179 | RNF213   | 17 | 75952179 | 3 | 0.200349 |
| SNP17-75952179 | RNF213   | 17 | 75952179 | 7 | 0.300529 |
| rs34933300     | FLJ35220 | 17 | 76010329 | 8 | 2.267865 |
| SNP17-76025428 | FLJ35220 | 17 | 76025428 | 2 | 0.649068 |
| SNP17-76025428 | FLJ35220 | 17 | 76025428 | 1 | 0.320101 |
| rs4889852      | NPTX1    | 17 | 76058102 | 5 | 0.29704  |
| rs4889852      | NPTX1    | 17 | 76058102 | 4 | 0.532121 |
| rs4077719      | NPTX1    | 17 | 76058893 | 5 | 1.774917 |
| rs4077719      | NPTX1    | 17 | 76058893 | 8 | 2.17859  |
| rs4077719      | NPTX1    | 17 | 76058893 | 2 | 0.131151 |
| rs4077719      | NPTX1    | 17 | 76058893 | 1 | 0.460528 |
| rs4077719      | NPTX1    | 17 | 76058893 | 3 | 1.202813 |
| rs12943620     | NPTX1    | 17 | 76059253 | 5 | 1.335046 |
| rs12943620     | NPTX1    | 17 | 76059253 | 6 | 0.685746 |
| rs12943620     | NPTX1    | 17 | 76059253 | 4 | 0.519622 |
| rs4890026      | NPTX1    | 17 | 76060297 | 5 | 0.30963  |
| rs2589156      | KIAA1303 | 17 | 76434969 | 3 | 0.533172 |
| rs2289759      | KIAA1303 | 17 | 76468818 | 6 | 0.901293 |
| rs2289759      | KIAA1303 | 17 | 76468818 | 7 | 0.270644 |
| rs2289759      | KIAA1303 | 17 | 76468818 | 4 | 4.796139 |
| rs2289759      | KIAA1303 | 17 | 76468818 | 3 | 0.137144 |
| rs1567962      | KIAA1303 | 17 | 76534153 | 3 | 0.043384 |
| rs1567962      | KIAA1303 | 17 | 76534153 | 6 | 0.40984  |
| rs4969391      | BAIAP2   | 17 | 76704185 | 4 | 0.189575 |
| rs4969391      | BAIAP2   | 17 | 76704185 | 5 | 0.004813 |
| rs4969391      | BAIAP2   | 17 | 76704185 | 2 | 0.310177 |
| rs12949063     | BAIAP2   | 17 | 76704933 | 1 | 1.273733 |

|                |          |    |          |   |          |
|----------------|----------|----|----------|---|----------|
| rs12949063     | BAIAP2   | 17 | 76704933 | 6 | 0.205932 |
| rs1542961      | AZI1     | 17 | 76785171 | 2 | 2.084595 |
| rs1542961      | AZI1     | 17 | 76785171 | 4 | 1.324592 |
| SNP17-76840859 | SLC38A10 | 17 | 76840859 | 4 | 0.288164 |
| SNP17-76840859 | SLC38A10 | 17 | 76840859 | 1 | 4.247716 |
| rs3803767      | MGC15523 | 17 | 76840957 | 7 | 0.258995 |
| rs2292184      | MGC15523 | 17 | 76859397 | 7 | 0.404982 |
| rs2292184      | MGC15523 | 17 | 76859397 | 6 | 5.990509 |
| rs2292184      | MGC15523 | 17 | 76859397 | 2 | 1.423282 |
| rs2292184      | MGC15523 | 17 | 76859397 | 1 | 1.287526 |
| rs2292184      | MGC15523 | 17 | 76859397 | 4 | 0.445363 |
| rs9911063      | TMEM105  | 17 | 76900043 | 3 | 1.008098 |
| rs9911063      | TMEM105  | 17 | 76900043 | 7 | 1.189079 |
| rs9911063      | TMEM105  | 17 | 76900043 | 4 | 0.332348 |
| rs9911063      | TMEM105  | 17 | 76900043 | 6 | 0.794279 |
| rs8076437      | TMEM105  | 17 | 76901658 | 6 | 0.011172 |
| rs8076437      | TMEM105  | 17 | 76901658 | 3 | 0.782542 |
| rs8076437      | TMEM105  | 17 | 76901658 | 7 | 1.363668 |
| rs7213444      | BAHCC1   | 17 | 77028902 | 3 | 0.284273 |
| rs7213444      | BAHCC1   | 17 | 77028902 | 8 | 1.386665 |
| SNP17-77029229 | BAHCC1   | 17 | 77029229 | 7 | 0.258059 |
| SNP17-77029229 | BAHCC1   | 17 | 77029229 | 6 | 3.994994 |
| SNP17-77033620 | BAHCC1   | 17 | 77033620 | 5 | 0.113153 |
| SNP17-77039111 | BAHCC1   | 17 | 77039111 | 5 | 1.376449 |
| SNP17-77039111 | BAHCC1   | 17 | 77039111 | 3 | 0.731015 |
| SNP17-77039111 | BAHCC1   | 17 | 77039111 | 8 | 0.061839 |
| rs8746         | BAHCC1   | 17 | 77044447 | 6 | 0.182272 |
| rs8746         | BAHCC1   | 17 | 77044447 | 3 | 0.282628 |
| rs8746         | BAHCC1   | 17 | 77044447 | 8 | 5.223887 |
| rs8077430      | C17orf70 | 17 | 77121588 | 6 | 1.100838 |
| rs8068511      | NPLOC4   | 17 | 77135234 | 6 | 0.29275  |
| rs8068511      | NPLOC4   | 17 | 77135234 | 7 | 0.711947 |
| rs8068511      | NPLOC4   | 17 | 77135234 | 3 | 0.010727 |
| rs8068511      | NPLOC4   | 17 | 77135234 | 1 | 3.723985 |
| rs9894429      | NPLOC4   | 17 | 77207216 | 2 | 2.767806 |
| rs9894429      | NPLOC4   | 17 | 77207216 | 1 | 0.783388 |
| rs9894429      | NPLOC4   | 17 | 77207216 | 7 | 0.557661 |
| rs6565616      | TSPAN10  | 17 | 77222566 | 7 | 1.253062 |
| SNP17-77222802 | TSPAN10  | 17 | 77222802 | 2 | 0.555347 |
| SNP17-77222802 | TSPAN10  | 17 | 77222802 | 7 | 1.269043 |
| SNP17-77222802 | TSPAN10  | 17 | 77222802 | 1 | 0.771536 |
| SNP17-77222946 | TSPAN10  | 17 | 77222946 | 8 | 0.375076 |
| rs8908         | PDE6G    | 17 | 77228276 | 1 | 1.708122 |
| rs8908         | PDE6G    | 17 | 77228276 | 6 | 0.714792 |
| rs8908         | PDE6G    | 17 | 77228276 | 7 | 0.665329 |
| rs8477         | PDE6G    | 17 | 77228464 | 1 | 0.708591 |
| rs8477         | PDE6G    | 17 | 77228464 | 6 | 2.989414 |

|                |           |    |          |   |          |
|----------------|-----------|----|----------|---|----------|
| rs8477         | PDE6G     | 17 | 77228464 | 7 | 1.348806 |
| GA033144       | CCDC137   | 17 | 77247754 | 1 | 4.596887 |
| GA033144       | CCDC137   | 17 | 77247754 | 8 | 4.952039 |
| SNP17-77547833 | ASPSCR1   | 17 | 77547833 | 2 | 2.968731 |
| SNP17-77547833 | ASPSCR1   | 17 | 77547833 | 8 | 8.495136 |
| SNP17-77547833 | ASPSCR1   | 17 | 77547833 | 6 | 1.661854 |
| SNP17-77547833 | ASPSCR1   | 17 | 77547833 | 5 | 0.219594 |
| rs4072801      | LRR45     | 17 | 77574605 | 5 | 0.125947 |
| SNP17-77611191 | DUS1L     | 17 | 77611191 | 5 | 0.217253 |
| rs7406162      | CCDC57    | 17 | 77679675 | 7 | 0.692914 |
| rs7406162      | CCDC57    | 17 | 77679675 | 1 | 3.165313 |
| SNP17-77679678 | CCDC57    | 17 | 77679678 | 1 | 5.174515 |
| SNP17-77679678 | CCDC57    | 17 | 77679678 | 7 | 0.278352 |
| SNP17-77945589 | FLJ22222  | 17 | 77945589 | 5 | 6.001795 |
| SNP17-77945592 | FLJ22222  | 17 | 77945592 | 2 | 0.22333  |
| SNP17-77945592 | FLJ22222  | 17 | 77945592 | 8 | 6.728028 |
| SNP17-78138365 | FOXK2     | 17 | 78138365 | 1 | 4.273769 |
| rs2248257      | LOC728694 | 17 | 78227280 | 5 | 0.224925 |
| rs2248257      | LOC728694 | 17 | 78227280 | 8 | 0.49813  |
| rs2248257      | LOC728694 | 17 | 78227280 | 1 | 4.562581 |
| rs2248257      | LOC728694 | 17 | 78227280 | 4 | 0.343591 |
| rs1056534      | FN3K      | 17 | 78301890 | 1 | 5.878048 |
| rs1056534      | FN3K      | 17 | 78301890 | 5 | 0.323    |
| SNP17-78382757 | ZNF750    | 17 | 78382757 | 6 | 1.050118 |
| SNP17-78382757 | ZNF750    | 17 | 78382757 | 3 | 0.07568  |
| SNP17-78382757 | ZNF750    | 17 | 78382757 | 4 | 0.471259 |
| rs12450046     | ZNF750    | 17 | 78383677 | 3 | 0.282494 |
| rs12450046     | ZNF750    | 17 | 78383677 | 6 | 0.187362 |
| rs12450046     | ZNF750    | 17 | 78383677 | 4 | 2.750701 |
| rs1127986      | TBCD      | 17 | 78480533 | 8 | 1.17234  |
| rs1127986      | TBCD      | 17 | 78480533 | 5 | 1.703815 |
| rs1127986      | TBCD      | 17 | 78480533 | 1 | 2.702886 |
| rs3785522      | TBCD      | 17 | 78489222 | 3 | 0.700349 |
| rs3785522      | TBCD      | 17 | 78489222 | 4 | 0.43509  |
| rs3603         | TBCD      | 17 | 78494291 | 1 | 5.013155 |
| rs3603         | TBCD      | 17 | 78494291 | 5 | 0.666168 |
| rs3603         | TBCD      | 17 | 78494291 | 8 | 4.148763 |
| rs1044661      | TBCD      | 17 | 78494309 | 1 | 0.394528 |
| rs1044661      | TBCD      | 17 | 78494309 | 3 | 0.532133 |
| rs1044661      | TBCD      | 17 | 78494309 | 2 | 1.945964 |
| rs1044661      | TBCD      | 17 | 78494309 | 7 | 0.989451 |
| rs8180         | TBCD      | 17 | 78494325 | 4 | 7.255083 |
| rs8180         | TBCD      | 17 | 78494325 | 3 | 0.843237 |
| rs8180         | TBCD      | 17 | 78494325 | 6 | 5.70252  |
| rs11077950     | B3GNTL1   | 17 | 78495039 | 5 | 0.865406 |
| rs11077950     | B3GNTL1   | 17 | 78495039 | 1 | 4.888919 |
| rs7406119      | B3GNTL1   | 17 | 78599918 | 5 | 1.495186 |

|                |           |    |          |   |          |
|----------------|-----------|----|----------|---|----------|
| SNP17-78636464 | METRNL    | 17 | 78636464 | 5 | 1.131216 |
| rs10660        | COLEC12   | 18 | 309446   | 5 | 1.086333 |
| rs12190        | COLEC12   | 18 | 309935   | 7 | 0.82465  |
| rs2305027      | COLEC12   | 18 | 324742   | 3 | 0.136886 |
| rs8098850      | COLEC12   | 18 | 325099   | 4 | 0.501259 |
| rs3826628      | COLEC12   | 18 | 336821   | 3 | 0.379084 |
| SNP18-648001   | C18orf56  | 18 | 648001   | 7 | 0.983708 |
| rs1047363      | METTL4    | 18 | 2527589  | 3 | 0.614972 |
| rs1047363      | METTL4    | 18 | 2527589  | 1 | 5.113475 |
| rs17534687     | METTL4    | 18 | 2527639  | 5 | 5.318946 |
| rs17534687     | METTL4    | 18 | 2527639  | 6 | 2.932258 |
| rs2644189      | METTL4    | 18 | 2561411  | 5 | 4.798528 |
| rs2644189      | METTL4    | 18 | 2561411  | 7 | 0.531533 |
| rs2644189      | METTL4    | 18 | 2561411  | 6 | 1.147911 |
| rs12456560     | NDC80     | 18 | 2585443  | 8 | 7.438756 |
| rs12456560     | NDC80     | 18 | 2585443  | 7 | 0.49231  |
| rs492170       | LOC645158 | 18 | 2642364  | 1 | 1.317485 |
| rs492170       | LOC645158 | 18 | 2642364  | 6 | 1.05401  |
| rs492170       | LOC645158 | 18 | 2642364  | 5 | 0.167959 |
| rs1059282      | EMILIN2   | 18 | 2903918  | 2 | 1.66395  |
| rs1059282      | EMILIN2   | 18 | 2903918  | 5 | 0.099555 |
| rs1985         | LPIN2     | 18 | 2907223  | 2 | 1.793658 |
| rs1985         | LPIN2     | 18 | 2907223  | 8 | 0.140442 |
| rs1985         | LPIN2     | 18 | 2907223  | 6 | 3.835164 |
| rs607549       | LPIN2     | 18 | 2909606  | 6 | 0.679117 |
| rs607549       | LPIN2     | 18 | 2909606  | 5 | 0.310826 |
| rs643507       | LOC727896 | 18 | 2936291  | 5 | 1.461231 |
| rs1042731      | MYOM1     | 18 | 3056944  | 5 | 0.461171 |
| rs1042731      | MYOM1     | 18 | 3056944  | 8 | 0.658979 |
| rs1042731      | MYOM1     | 18 | 3056944  | 4 | 0.057814 |
| rs1042731      | MYOM1     | 18 | 3056944  | 6 | 0.393531 |
| rs2230164      | MYOM1     | 18 | 3057278  | 5 | 0.198603 |
| rs2230164      | MYOM1     | 18 | 3057278  | 2 | 1.663045 |
| rs2230164      | MYOM1     | 18 | 3057278  | 4 | 2.663195 |
| rs2230164      | MYOM1     | 18 | 3057278  | 6 | 0.430566 |
| rs2230164      | MYOM1     | 18 | 3057278  | 8 | 0.275339 |
| rs16944353     | MYOM1     | 18 | 3065746  | 6 | 0.541495 |
| rs16944353     | MYOM1     | 18 | 3065746  | 4 | 1.697993 |
| rs8086066      | MYOM1     | 18 | 3158816  | 8 | 0.403755 |
| rs8086066      | MYOM1     | 18 | 3158816  | 4 | 2.007708 |
| rs8099021      | MYOM1     | 18 | 3166040  | 1 | 1.459013 |
| rs8099021      | MYOM1     | 18 | 3166040  | 5 | 1.222379 |
| rs9964300      | MYOM1     | 18 | 3205030  | 4 | 0.127532 |
| rs1662315      | MYOM1     | 18 | 3205230  | 4 | 0.918015 |
| rs238533       | TGIF1     | 18 | 3441762  | 3 | 0.090524 |
| rs3888654      | FLJ35776  | 18 | 3587864  | 5 | 0.690592 |
| rs3888654      | FLJ35776  | 18 | 3587864  | 8 | 0.056816 |

|               |           |    |         |   |          |
|---------------|-----------|----|---------|---|----------|
| rs3786431     | DLGAP1    | 18 | 3804148 | 7 | 0.491723 |
| rs1395063     | LOC642597 | 18 | 5135609 | 6 | 0.995579 |
| rs2789        | ZFP161    | 18 | 5279887 | 5 | 0.229562 |
| rs2789        | ZFP161    | 18 | 5279887 | 4 | 0.024127 |
| rs2789        | ZFP161    | 18 | 5279887 | 7 | 0.681855 |
| rs2789        | ZFP161    | 18 | 5279887 | 2 | 2.295837 |
| rs2789        | ZFP161    | 18 | 5279887 | 6 | 4.77411  |
| rs2789        | ZFP161    | 18 | 5279887 | 1 | 0.023791 |
| rs2789        | ZFP161    | 18 | 5279887 | 3 | 0.139829 |
| SNP18-6291903 | L3MBTL4   | 18 | 6291903 | 5 | 0.122572 |
| rs1116757     | ARHGAP28  | 18 | 6880434 | 4 | 0.398643 |
| rs2163467     | ARHGAP28  | 18 | 6902317 | 8 | 0.581495 |
| rs2163467     | ARHGAP28  | 18 | 6902317 | 6 | 2.183776 |
| rs2163467     | ARHGAP28  | 18 | 6902317 | 4 | 0.359943 |
| rs1431390     | ARHGAP28  | 18 | 6902332 | 8 | 0.70115  |
| rs1431390     | ARHGAP28  | 18 | 6902332 | 6 | 1.160503 |
| rs4798512     | ARHGAP28  | 18 | 6902944 | 6 | 3.987884 |
| rs4798512     | ARHGAP28  | 18 | 6902944 | 4 | 1.985041 |
| rs5029322     | ARHGAP28  | 18 | 6903016 | 8 | 3.200275 |
| rs5029322     | ARHGAP28  | 18 | 6903016 | 6 | 2.391932 |
| rs5029322     | ARHGAP28  | 18 | 6903016 | 4 | 0.168496 |
| rs4398174     | ARHGAP28  | 18 | 6903378 | 4 | 1.358534 |
| rs4398174     | ARHGAP28  | 18 | 6903378 | 8 | 4.626441 |
| rs4486988     | ARHGAP28  | 18 | 6903420 | 8 | 0.243108 |
| rs4486988     | ARHGAP28  | 18 | 6903420 | 4 | 4.955008 |
| rs4486988     | ARHGAP28  | 18 | 6903420 | 6 | 0.639657 |
| rs7236448     | ARHGAP28  | 18 | 6903534 | 8 | 0.651602 |
| rs1052892     | ARHGAP28  | 18 | 6903716 | 8 | 1.672388 |
| rs1052892     | ARHGAP28  | 18 | 6903716 | 6 | 5.15463  |
| rs1052892     | ARHGAP28  | 18 | 6903716 | 4 | 0.083546 |
| rs4393650     | ARHGAP28  | 18 | 6903841 | 6 | 2.21512  |
| rs4393650     | ARHGAP28  | 18 | 6903841 | 8 | 5.107831 |
| rs4393650     | ARHGAP28  | 18 | 6903841 | 4 | 1.021919 |
| rs1431389     | ARHGAP28  | 18 | 6903975 | 6 | 1.594866 |
| rs1431389     | ARHGAP28  | 18 | 6903975 | 8 | 0.088882 |
| rs1431389     | ARHGAP28  | 18 | 6903975 | 4 | 3.698629 |
| rs1431388     | ARHGAP28  | 18 | 6904033 | 8 | 1.486351 |
| rs1431388     | ARHGAP28  | 18 | 6904033 | 6 | 0.23233  |
| rs1431388     | ARHGAP28  | 18 | 6904033 | 4 | 0.004007 |
| rs1431387     | ARHGAP28  | 18 | 6904054 | 6 | 3.473861 |
| rs1431387     | ARHGAP28  | 18 | 6904054 | 8 | 1.387551 |
| rs1431387     | ARHGAP28  | 18 | 6904054 | 4 | 0.244172 |
| rs1060012     | ARHGAP28  | 18 | 6904458 | 4 | 0.321009 |
| rs1060012     | ARHGAP28  | 18 | 6904458 | 6 | 5.80661  |
| rs1060027     | ARHGAP28  | 18 | 6905639 | 8 | 1.178887 |
| rs1060027     | ARHGAP28  | 18 | 6905639 | 4 | 0.141332 |
| rs1060027     | ARHGAP28  | 18 | 6905639 | 6 | 2.283516 |

|               |           |    |         |   |          |
|---------------|-----------|----|---------|---|----------|
| rs4797265     | FLJ38028  | 18 | 6918180 | 1 | 0.883682 |
| rs607230      | LAMA1     | 18 | 6970523 | 8 | 0.152943 |
| rs607230      | LAMA1     | 18 | 6970523 | 6 | 4.4404   |
| rs607230      | LAMA1     | 18 | 6970523 | 4 | 3.579344 |
| rs607230      | LAMA1     | 18 | 6970523 | 1 | 0.865347 |
| rs11661974    | LAMA1     | 18 | 6973194 | 3 | 0.545213 |
| SNP18-6976227 | LAMA1     | 18 | 6976227 | 1 | 3.636219 |
| SNP18-6976227 | LAMA1     | 18 | 6976227 | 6 | 0.526321 |
| SNP18-6976227 | LAMA1     | 18 | 6976227 | 4 | 4.752266 |
| rs12961939    | LAMA1     | 18 | 6987818 | 8 | 0.119623 |
| rs12970643    | LAMA1     | 18 | 6989963 | 3 | 0.839968 |
| rs619106      | LAMA1     | 18 | 7001413 | 4 | 0.364372 |
| rs619106      | LAMA1     | 18 | 7001413 | 1 | 2.066227 |
| rs619106      | LAMA1     | 18 | 7001413 | 3 | 1.177176 |
| rs684634      | LAMA1     | 18 | 7013371 | 3 | 1.628289 |
| rs684634      | LAMA1     | 18 | 7013371 | 1 | 3.467047 |
| rs684634      | LAMA1     | 18 | 7013371 | 7 | 1.754372 |
| rs334407      | LAMA1     | 18 | 7107782 | 1 | 1.210444 |
| rs334407      | LAMA1     | 18 | 7107782 | 2 | 2.183626 |
| rs334407      | LAMA1     | 18 | 7107782 | 5 | 1.542941 |
| rs593950      | PTPRM     | 18 | 8377219 | 8 | 3.164151 |
| rs593950      | PTPRM     | 18 | 8377219 | 7 | 1.138108 |
| rs593950      | PTPRM     | 18 | 8377219 | 3 | 0.554519 |
| rs647241      | LOC729391 | 18 | 8403996 | 5 | 1.229102 |
| rs12960076    | RAB12     | 18 | 8600640 | 5 | 0.983141 |
| SNP18-8773835 | KIAA0802  | 18 | 8773835 | 1 | 2.77143  |
| SNP18-8773835 | KIAA0802  | 18 | 8773835 | 6 | 0.130145 |
| rs918272      | KIAA0802  | 18 | 8774370 | 5 | 0.122489 |
| SNP18-8774612 | KIAA0802  | 18 | 8774612 | 5 | 0.42415  |
| SNP18-8774612 | KIAA0802  | 18 | 8774612 | 1 | 1.644766 |
| SNP18-8774612 | KIAA0802  | 18 | 8774612 | 3 | 0.802958 |
| SNP18-8774723 | KIAA0802  | 18 | 8774723 | 3 | 1.755922 |
| SNP18-8774723 | KIAA0802  | 18 | 8774723 | 1 | 0.311701 |
| SNP18-8774723 | KIAA0802  | 18 | 8774723 | 7 | 0.806122 |
| SNP18-8796925 | KIAA0802  | 18 | 8796925 | 8 | 0.613023 |
| rs581894      | KIAA0802  | 18 | 8815192 | 8 | 3.72114  |
| rs581894      | KIAA0802  | 18 | 8815192 | 1 | 3.698655 |
| rs581894      | KIAA0802  | 18 | 8815192 | 7 | 0.094195 |
| rs2242273     | KIAA0802  | 18 | 8818952 | 6 | 0.024986 |
| rs17496551    | LOC645573 | 18 | 9010334 | 6 | 5.523759 |
| rs16954690    | LOC645573 | 18 | 9010701 | 6 | 0.530036 |
| rs16954690    | LOC645573 | 18 | 9010701 | 2 | 2.425291 |
| SNP18-9112611 | NDUFV2    | 18 | 9112611 | 3 | 1.541639 |
| SNP18-9112611 | NDUFV2    | 18 | 9112611 | 7 | 5.502766 |
| SNP18-9112611 | NDUFV2    | 18 | 9112611 | 6 | 2.200387 |
| SNP18-9245784 | ANKRD12   | 18 | 9245784 | 3 | 0.355136 |
| SNP18-9246258 | ANKRD12   | 18 | 9246258 | 4 | 5.002873 |

|               |               |    |          |   |          |
|---------------|---------------|----|----------|---|----------|
| SNP18-9248537 | ANKRD12       | 18 | 9248537  | 3 | 0.208087 |
| rs34595349    | TWSG1         | 18 | 9386524  | 1 | 2.828572 |
| rs527575      | RAB31         | 18 | 9852138  | 2 | 1.208637 |
| rs527575      | RAB31         | 18 | 9852138  | 6 | 6.133086 |
| rs527575      | RAB31         | 18 | 9852138  | 7 | 8.344031 |
| rs11664080    | TXNDC2        | 18 | 9878027  | 4 | 0.332203 |
| rs2240905     | TXNDC2        | 18 | 9878069  | 3 | 0.531575 |
| rs29104       | VAPA          | 18 | 9945753  | 1 | 2.271677 |
| rs29104       | VAPA          | 18 | 9945753  | 3 | 0.059584 |
| rs28212       | VAPA          | 18 | 9949882  | 3 | 0.398093 |
| rs28212       | VAPA          | 18 | 9949882  | 7 | 0.674842 |
| rs28212       | VAPA          | 18 | 9949882  | 5 | 0.265043 |
| rs3748415     | APCDD1        | 18 | 10461732 | 1 | 5.17807  |
| rs3748421     | FAM38B        | 18 | 10681357 | 8 | 1.131057 |
| rs662515      | MPPE1         | 18 | 11876563 | 7 | 0.003084 |
| rs662515      | MPPE1         | 18 | 11876563 | 2 | 0.040426 |
| rs662515      | MPPE1         | 18 | 11876563 | 6 | 0.278827 |
| rs662515      | MPPE1         | 18 | 11876563 | 3 | 0.178946 |
| rs4643402     | LOC284226     | 18 | 12046850 | 8 | 2.041277 |
| rs4643402     | LOC284226     | 18 | 12046850 | 3 | 2.363319 |
| rs4643402     | LOC284226     | 18 | 12046850 | 4 | 1.650756 |
| rs12458258    | LOC728211     | 18 | 12066365 | 6 | 4.326846 |
| rs12458258    | LOC728211     | 18 | 12066365 | 3 | 4.027132 |
| rs1986751     | DKFZp779B1634 | 18 | 12086249 | 3 | 5.509267 |
| rs1986751     | DKFZp779B1634 | 18 | 12086249 | 4 | 2.622212 |
| rs1986751     | DKFZp779B1634 | 18 | 12086249 | 6 | 2.208094 |
| rs6505715     | DKFZp779B1634 | 18 | 12089654 | 3 | 0.554795 |
| rs4519391     | DKFZp779B1634 | 18 | 12105509 | 4 | 2.742965 |
| rs4519391     | DKFZp779B1634 | 18 | 12105509 | 3 | 0.293573 |
| rs7244929     | CIDEA         | 18 | 12267358 | 3 | 0.001458 |
| rs7244929     | CIDEA         | 18 | 12267358 | 2 | 5.400581 |
| rs7244929     | CIDEA         | 18 | 12267358 | 6 | 6.430032 |
| rs4797701     | CEP76         | 18 | 12692610 | 7 | 0.653274 |
| rs4797701     | CEP76         | 18 | 12692610 | 6 | 0.20645  |
| rs4797701     | CEP76         | 18 | 12692610 | 5 | 0.185055 |
| rs4797701     | CEP76         | 18 | 12692610 | 8 | 0.988158 |
| rs2282542     | CEP192        | 18 | 13046682 | 7 | 0.009906 |
| rs7228940     | CEP192        | 18 | 13058109 | 7 | 0.322836 |
| SNP18-1308559 | CEP192        | 18 | 13085591 | 7 | 0.162901 |
| rs9965848     | LOC729713     | 18 | 13251896 | 5 | 1.261359 |
| rs9965848     | LOC729713     | 18 | 13251896 | 3 | 1.181388 |
| rs9965848     | LOC729713     | 18 | 13251896 | 7 | 1.417114 |
| rs9965848     | LOC729713     | 18 | 13251896 | 1 | 2.462695 |
| rs1284441     | C18orf1       | 18 | 13602072 | 1 | 3.479814 |
| rs1284441     | C18orf1       | 18 | 13602072 | 5 | 0.735163 |
| rs11659762    | RNMT          | 18 | 13750954 | 8 | 3.647136 |
| rs11659762    | RNMT          | 18 | 13750954 | 7 | 5.402451 |



|                |           |    |          |   |          |
|----------------|-----------|----|----------|---|----------|
| rs9303806      | LOC390834 | 18 | 14382456 | 6 | 2.454393 |
| rs11872553     | LOC729888 | 18 | 17574821 | 7 | 0.10374  |
| rs11872553     | LOC729888 | 18 | 17574821 | 1 | 0.005207 |
| rs7449         | MIB1      | 18 | 17700991 | 3 | 0.155762 |
| rs7449         | MIB1      | 18 | 17700991 | 6 | 8.535721 |
| rs1805081      | NPC1      | 18 | 19394430 | 5 | 0.068313 |
| rs1805081      | NPC1      | 18 | 19394430 | 4 | 0.308823 |
| rs1805081      | NPC1      | 18 | 19394430 | 3 | 0.47912  |
| rs1652364      | ANKRD29   | 18 | 19434361 | 2 | 3.114889 |
| rs1652364      | ANKRD29   | 18 | 19434361 | 7 | 0.669015 |
| rs35756007     | LAMA3     | 18 | 19671024 | 4 | 0.199903 |
| rs1154226      | LAMA3     | 18 | 19735231 | 5 | 0.590306 |
| rs1154226      | LAMA3     | 18 | 19735231 | 4 | 0.016445 |
| rs1154226      | LAMA3     | 18 | 19735231 | 8 | 7.278048 |
| rs1154226      | LAMA3     | 18 | 19735231 | 3 | 0.132969 |
| rs1154232      | LAMA3     | 18 | 19765032 | 3 | 0.695743 |
| rs1154232      | LAMA3     | 18 | 19765032 | 1 | 1.270413 |
| rs1154232      | LAMA3     | 18 | 19765032 | 4 | 0.388667 |
| rs1131521      | LAMA3     | 18 | 19767766 | 5 | 4.177268 |
| rs1131521      | LAMA3     | 18 | 19767766 | 1 | 3.976524 |
| rs1131521      | LAMA3     | 18 | 19767766 | 3 | 0.331856 |
| rs12327412     | C18orf17  | 18 | 19826835 | 5 | 1.388308 |
| rs12327412     | C18orf17  | 18 | 19826835 | 4 | 0.693507 |
| rs12327412     | C18orf17  | 18 | 19826835 | 3 | 0.208163 |
| rs1049683      | CABYR     | 18 | 19990931 | 1 | 5.750111 |
| rs582234       | IMPACT    | 18 | 20274465 | 3 | 0.010748 |
| SNP18-20310764 | HRH4      | 18 | 20310764 | 3 | 0.205436 |
| SNP18-20310764 | HRH4      | 18 | 20310764 | 7 | 0.560104 |
| SNP18-20310764 | HRH4      | 18 | 20310764 | 1 | 1.904595 |
| rs11662595     | HRH4      | 18 | 20310968 | 3 | 0.101788 |
| rs1421126      | HRH4      | 18 | 20311736 | 5 | 1.118417 |
| rs12457139     | LOC390843 | 18 | 20356499 | 7 | 2.064759 |
| rs11083084     | LOC729950 | 18 | 20494393 | 7 | 1.400799 |
| rs11083084     | LOC729950 | 18 | 20494393 | 2 | 3.447459 |
| rs11083084     | LOC729950 | 18 | 20494393 | 3 | 1.160584 |
| rs1620992      | LOC729950 | 18 | 20494862 | 6 | 0.472427 |
| rs1620992      | LOC729950 | 18 | 20494862 | 2 | 4.755619 |
| rs1620992      | LOC729950 | 18 | 20494862 | 5 | 3.409425 |
| rs1620992      | LOC729950 | 18 | 20494862 | 4 | 1.572901 |
| rs1620992      | LOC729950 | 18 | 20494862 | 8 | 0.017466 |
| rs2069310      | PSMA8     | 18 | 22026571 | 3 | 0.105612 |
| SNP18-22126233 | TAF4B     | 18 | 22126233 | 2 | 2.896929 |
| SNP18-22126233 | TAF4B     | 18 | 22126233 | 1 | 0.450503 |
| rs1677016      | TAF4B     | 18 | 22127461 | 8 | 0.395298 |
| rs1677016      | TAF4B     | 18 | 22127461 | 1 | 0.971416 |
| rs1677016      | TAF4B     | 18 | 22127461 | 2 | 3.823749 |
| rs546234       | LOC728599 | 18 | 22433854 | 3 | 0.618026 |

|                |           |    |          |   |          |
|----------------|-----------|----|----------|---|----------|
| rs546234       | LOC728599 | 18 | 22433854 | 1 | 1.142934 |
| rs546234       | LOC728599 | 18 | 22433854 | 5 | 0.280221 |
| rs546234       | LOC728599 | 18 | 22433854 | 7 | 1.467601 |
| rs546234       | LOC728599 | 18 | 22433854 | 4 | 0.408592 |
| rs2438413      | LOC728599 | 18 | 22434687 | 6 | 4.542129 |
| rs2438413      | LOC728599 | 18 | 22434687 | 7 | 4.378679 |
| rs567555       | LOC728599 | 18 | 22434888 | 7 | 4.540007 |
| rs567555       | LOC728599 | 18 | 22434888 | 3 | 4.52214  |
| rs567555       | LOC728599 | 18 | 22434888 | 6 | 3.284772 |
| rs8096168      | hCG_38480 | 18 | 22523384 | 5 | 0.434976 |
| rs8096168      | hCG_38480 | 18 | 22523384 | 4 | 1.604768 |
| rs8096168      | hCG_38480 | 18 | 22523384 | 6 | 1.725583 |
| rs8096168      | hCG_38480 | 18 | 22523384 | 2 | 2.62313  |
| rs8096168      | hCG_38480 | 18 | 22523384 | 7 | 1.142009 |
| rs1058427      | AQP4      | 18 | 22689093 | 4 | 0.328371 |
| rs1058427      | AQP4      | 18 | 22689093 | 3 | 1.63104  |
| rs1058424      | AQP4      | 18 | 22689543 | 4 | 3.890258 |
| rs335929       | AQP4      | 18 | 22689585 | 1 | 0.255271 |
| rs162008       | AQP4      | 18 | 22699690 | 1 | 0.994958 |
| rs163057       | C18orf16  | 18 | 22768586 | 5 | 0.290088 |
| rs163057       | C18orf16  | 18 | 22768586 | 1 | 0.804739 |
| rs163056       | C18orf16  | 18 | 22768712 | 5 | 0.32068  |
| rs163056       | C18orf16  | 18 | 22768712 | 1 | 3.023594 |
| rs16942974     | C18orf16  | 18 | 22768781 | 1 | 2.352819 |
| rs11564422     | CDH2      | 18 | 23786078 | 3 | 0.96119  |
| rs17656284     | DSC3      | 18 | 26827165 | 5 | 1.192642 |
| rs7244822      | DSC1      | 18 | 26964020 | 3 | 0.888249 |
| rs985862       | DSC1      | 18 | 26964430 | 3 | 0.075061 |
| SNP18-26967992 | DSC1      | 18 | 26967992 | 4 | 0.897285 |
| rs36081634     | DSC1      | 18 | 26976131 | 1 | 1.193379 |
| rs2249810      | DSC1      | 18 | 26988747 | 8 | 0.129331 |
| rs2249810      | DSC1      | 18 | 26988747 | 1 | 3.92641  |
| rs1426310      | DSG1      | 18 | 27152292 | 5 | 0.551676 |
| rs12967407     | DSG1      | 18 | 27167597 | 8 | 0.929918 |
| rs12967407     | DSG1      | 18 | 27167597 | 6 | 0.077817 |
| rs12967407     | DSG1      | 18 | 27167597 | 5 | 0.311599 |
| rs12967407     | DSG1      | 18 | 27167597 | 1 | 1.902485 |
| rs12967407     | DSG1      | 18 | 27167597 | 3 | 0.579118 |
| rs8091117      | DSG1      | 18 | 27173792 | 8 | 3.555961 |
| rs8091117      | DSG1      | 18 | 27173792 | 6 | 0.192208 |
| SNP18-27173909 | DSG1      | 18 | 27173909 | 8 | 5.824623 |
| SNP18-27173909 | DSG1      | 18 | 27173909 | 6 | 0.832359 |
| rs16959856     | DSG4      | 18 | 27222369 | 2 | 2.603053 |
| rs16959856     | DSG4      | 18 | 27222369 | 8 | 4.430922 |
| rs16959856     | DSG4      | 18 | 27222369 | 3 | 0.745415 |
| rs9956865      | DSG4      | 18 | 27222957 | 8 | 1.904417 |
| rs9956865      | DSG4      | 18 | 27222957 | 2 | 4.111501 |

|                |          |    |          |   |          |
|----------------|----------|----|----------|---|----------|
| rs9956865      | DSG4     | 18 | 27222957 | 3 | 0.475088 |
| rs4799570      | DSG4     | 18 | 27240331 | 7 | 0.164774 |
| rs4799570      | DSG4     | 18 | 27240331 | 3 | 1.135146 |
| rs2278792      | DSG2     | 18 | 27376797 | 5 | 0.521449 |
| rs2278792      | DSG2     | 18 | 27376797 | 6 | 1.256255 |
| rs17662563     | RNF125   | 18 | 27852807 | 7 | 0.614538 |
| rs17662563     | RNF125   | 18 | 27852807 | 1 | 3.214934 |
| SNP18-27879683 | RNF125   | 18 | 27879683 | 3 | 0.291625 |
| rs4799640      | MEP1B    | 18 | 28042105 | 8 | 0.239123 |
| rs4799640      | MEP1B    | 18 | 28042105 | 3 | 1.229558 |
| rs4799640      | MEP1B    | 18 | 28042105 | 1 | 0.910475 |
| rs173032       | MEP1B    | 18 | 28049074 | 3 | 0.473252 |
| rs173032       | MEP1B    | 18 | 28049074 | 8 | 0.340173 |
| rs173032       | MEP1B    | 18 | 28049074 | 1 | 0.230604 |
| rs233223       | MEP1B    | 18 | 28049099 | 8 | 0.136768 |
| rs233223       | MEP1B    | 18 | 28049099 | 2 | 1.633839 |
| rs233223       | MEP1B    | 18 | 28049099 | 1 | 0.706938 |
| rs233223       | MEP1B    | 18 | 28049099 | 4 | 1.893693 |
| rs616114       | MEP1B    | 18 | 28051919 | 4 | 0.004025 |
| rs616114       | MEP1B    | 18 | 28051919 | 3 | 0.941659 |
| rs616114       | MEP1B    | 18 | 28051919 | 1 | 0.935739 |
| rs616114       | MEP1B    | 18 | 28051919 | 8 | 0.225937 |
| rs2282632      | ASXL3    | 18 | 29574227 | 5 | 0.307463 |
| rs2282632      | ASXL3    | 18 | 29574227 | 1 | 0.33842  |
| rs2282632      | ASXL3    | 18 | 29574227 | 2 | 2.524018 |
| rs2282632      | ASXL3    | 18 | 29574227 | 7 | 0.632759 |
| rs2282632      | ASXL3    | 18 | 29574227 | 4 | 3.19408  |
| rs7243541      | ASXL3    | 18 | 29581294 | 6 | 0.247283 |
| rs3810021      | MAPRE2   | 18 | 30975076 | 7 | 1.170949 |
| rs1050377      | MAPRE2   | 18 | 30975400 | 7 | 0.216121 |
| SNP18-31141538 | ZNF271   | 18 | 31141538 | 1 | 2.978716 |
| rs9963614      | ZNF271   | 18 | 31141931 | 7 | 4.0674   |
| rs10502647     | ZNF396   | 18 | 31201178 | 6 | 0.759949 |
| rs2298716      | C18orf21 | 18 | 31806596 | 3 | 0.396001 |
| rs2298716      | C18orf21 | 18 | 31806596 | 8 | 3.514089 |
| rs2298716      | C18orf21 | 18 | 31806596 | 5 | 0.502869 |
| SNP18-31811464 | C18orf21 | 18 | 31811464 | 3 | 0.27433  |
| SNP18-31811464 | C18orf21 | 18 | 31811464 | 5 | 1.166249 |
| rs8299         | ELP2     | 18 | 32004044 | 3 | 0.22414  |
| rs3744900      | MOCOS    | 18 | 32033703 | 7 | 0.258079 |
| rs2017027      | KIAA1328 | 18 | 33059192 | 7 | 1.582886 |
| rs2017027      | KIAA1328 | 18 | 33059192 | 5 | 0.151447 |
| SNP18-33104844 | BRUNOL4  | 18 | 33104844 | 5 | 0.854318 |
| rs1804730      | RIT2     | 18 | 38577495 | 3 | 1.200162 |
| rs11082414     | SETBP1   | 18 | 40783994 | 7 | 0.422009 |
| rs1064204      | SETBP1   | 18 | 40786691 | 1 | 4.952072 |
| rs2156609      | SLC14A2  | 18 | 41500999 | 4 | 0.427335 |

|                |          |    |          |   |          |
|----------------|----------|----|----------|---|----------|
| rs2156609      | SLC14A2  | 18 | 41500999 | 3 | 0.017319 |
| rs2156609      | SLC14A2  | 18 | 41500999 | 6 | 0.379121 |
| rs2156609      | SLC14A2  | 18 | 41500999 | 7 | 0.269841 |
| rs3745009      | SLC14A2  | 18 | 41516357 | 7 | 1.879758 |
| rs3745009      | SLC14A2  | 18 | 41516357 | 5 | 0.610503 |
| rs3745009      | SLC14A2  | 18 | 41516357 | 4 | 0.700696 |
| rs2298718      | SLC14A1  | 18 | 41570536 | 1 | 1.318574 |
| rs1058396      | SLC14A1  | 18 | 41573517 | 1 | 3.328363 |
| rs1058396      | SLC14A1  | 18 | 41573517 | 8 | 3.410656 |
| rs1058396      | SLC14A1  | 18 | 41573517 | 7 | 1.384183 |
| rs9954521      | SLC14A1  | 18 | 41584894 | 3 | 0.802091 |
| SNP18-41674175 | SIGLEC15 | 18 | 41674175 | 4 | 0.344092 |
| SNP18-41674175 | SIGLEC15 | 18 | 41674175 | 3 | 0.933527 |
| rs500899       | SIGLEC15 | 18 | 41676278 | 4 | 0.03736  |
| rs500899       | SIGLEC15 | 18 | 41676278 | 3 | 1.609804 |
| rs1055066      | KIAA1632 | 18 | 41681621 | 3 | 0.890532 |
| rs1055066      | KIAA1632 | 18 | 41681621 | 8 | 0.260252 |
| rs1055066      | KIAA1632 | 18 | 41681621 | 4 | 0.488297 |
| rs507653       | KIAA1632 | 18 | 41686290 | 3 | 0.062752 |
| rs507653       | KIAA1632 | 18 | 41686290 | 4 | 3.782138 |
| rs507653       | KIAA1632 | 18 | 41686290 | 8 | 5.401717 |
| SNP18-41788822 | KIAA1632 | 18 | 41788822 | 3 | 0.539829 |
| rs7229227      | PSTPIP2  | 18 | 41818294 | 1 | 5.647152 |
| rs1438388      | PSTPIP2  | 18 | 41818925 | 1 | 7.396822 |
| SNP18-42087699 | C18orf25 | 18 | 42087699 | 7 | 0.610575 |
| SNP18-42087699 | C18orf25 | 18 | 42087699 | 4 | 0.489935 |
| SNP18-42087699 | C18orf25 | 18 | 42087699 | 8 | 1.441717 |
| rs9965681      | RNF165   | 18 | 42292441 | 1 | 0.868748 |
| rs9965681      | RNF165   | 18 | 42292441 | 7 | 0.266883 |
| rs9965681      | RNF165   | 18 | 42292441 | 4 | 1.977967 |
| rs12968582     | RNF165   | 18 | 42292555 | 1 | 2.174995 |
| rs12968582     | RNF165   | 18 | 42292555 | 7 | 0.399324 |
| rs12968582     | RNF165   | 18 | 42292555 | 4 | 0.229436 |
| rs17766830     | RNF165   | 18 | 42294658 | 7 | 5.823904 |
| rs17766830     | RNF165   | 18 | 42294658 | 2 | 2.913888 |
| rs17766830     | RNF165   | 18 | 42294658 | 3 | 1.152075 |
| rs12606417     | LOXHD1   | 18 | 42358435 | 5 | 1.632163 |
| rs674948       | LOXHD1   | 18 | 42435594 | 2 | 1.427044 |
| rs7233515      | KATNAL2  | 18 | 42839953 | 5 | 0.999603 |
| rs7233515      | KATNAL2  | 18 | 42839953 | 2 | 4.235729 |
| rs2289130      | KATNAL2  | 18 | 42880628 | 4 | 0.841361 |
| rs2289130      | KATNAL2  | 18 | 42880628 | 5 | 3.350734 |
| rs2277712      | KIAA0427 | 18 | 44417047 | 4 | 0.013562 |
| rs2276170      | MYO5B    | 18 | 45623756 | 3 | 0.928003 |
| rs1942418      | MYO5B    | 18 | 45637241 | 2 | 5.65479  |
| rs1942418      | MYO5B    | 18 | 45637241 | 3 | 0.138899 |
| SNP18-45820645 | MYO5B    | 18 | 45820645 | 6 | 1.165625 |

|                |          |    |          |   |          |
|----------------|----------|----|----------|---|----------|
| SNP18-45820645 | MYO5B    | 18 | 45820645 | 4 | 0.819223 |
| SNP18-45820645 | MYO5B    | 18 | 45820645 | 5 | 0.357828 |
| SNP18-45820645 | MYO5B    | 18 | 45820645 | 2 | 2.980174 |
| SNP18-46031242 | CCDC11   | 18 | 46031242 | 4 | 0.791742 |
| SNP18-46031242 | CCDC11   | 18 | 46031242 | 6 | 0.516881 |
| SNP18-46031242 | CCDC11   | 18 | 46031242 | 7 | 0.395841 |
| SNP18-46031242 | CCDC11   | 18 | 46031242 | 3 | 0.233248 |
| rs140686       | MBD1     | 18 | 46057352 | 4 | 0.718299 |
| rs7228084      | CXXC1    | 18 | 46064349 | 7 | 6.643759 |
| rs11663953     | C18orf24 | 18 | 46155469 | 8 | 1.906583 |
| rs6507992      | C18orf24 | 18 | 46162554 | 8 | 5.189403 |
| rs6507992      | C18orf24 | 18 | 46162554 | 1 | 0.853637 |
| rs6507992      | C18orf24 | 18 | 46162554 | 2 | 0.52373  |
| rs6507992      | C18orf24 | 18 | 46162554 | 7 | 0.944106 |
| rs6507992      | C18orf24 | 18 | 46162554 | 5 | 0.159971 |
| rs6507992      | C18orf24 | 18 | 46162554 | 3 | 1.062387 |
| rs10460085     | C18orf24 | 18 | 46172637 | 6 | 3.369437 |
| rs10460085     | C18orf24 | 18 | 46172637 | 5 | 3.718624 |
| rs10460085     | C18orf24 | 18 | 46172637 | 7 | 0.782177 |
| rs10460085     | C18orf24 | 18 | 46172637 | 3 | 1.515775 |
| rs10460085     | C18orf24 | 18 | 46172637 | 1 | 1.077456 |
| SNP18-46444438 | MAPK4    | 18 | 46444438 | 8 | 7.188244 |
| SNP18-46444438 | MAPK4    | 18 | 46444438 | 2 | 2.887026 |
| rs11873058     | MRO      | 18 | 46578885 | 1 | 1.641525 |
| rs2276186      | MRO      | 18 | 46581813 | 8 | 0.886535 |
| rs2276186      | MRO      | 18 | 46581813 | 7 | 1.107149 |
| rs2276186      | MRO      | 18 | 46581813 | 5 | 0.341213 |
| rs2586776      | MRO      | 18 | 46585522 | 5 | 0.765549 |
| rs2849233      | MRO      | 18 | 46585551 | 4 | 0.763575 |
| rs2849233      | MRO      | 18 | 46585551 | 8 | 0.958846 |
| rs2849233      | MRO      | 18 | 46585551 | 3 | 0.307323 |
| rs2849233      | MRO      | 18 | 46585551 | 5 | 0.373782 |
| SNP18-46589771 | MRO      | 18 | 46589771 | 5 | 0.266633 |
| SNP18-46589771 | MRO      | 18 | 46589771 | 2 | 0.3243   |
| rs1259938      | MBD2     | 18 | 49934755 | 2 | 4.763519 |
| rs1259938      | MBD2     | 18 | 49934755 | 4 | 0.295808 |
| rs1259938      | MBD2     | 18 | 49934755 | 7 | 0.760237 |
| rs1259938      | MBD2     | 18 | 49934755 | 5 | 2.974173 |
| rs17470798     | STARD6   | 18 | 50112195 | 1 | 2.50034  |
| rs3753054      | C18orf54 | 18 | 50158839 | 2 | 4.882534 |
| rs1061830      | C18orf54 | 18 | 50162065 | 2 | 3.37545  |
| rs9947055      | C18orf26 | 18 | 50416306 | 5 | 0.990187 |
| rs9947055      | C18orf26 | 18 | 50416306 | 1 | 1.476826 |
| rs9947055      | C18orf26 | 18 | 50416306 | 4 | 0.250942 |
| rs1944362      | CCDC68   | 18 | 50721343 | 1 | 1.071842 |
| rs1944362      | CCDC68   | 18 | 50721343 | 5 | 1.186707 |
| rs4801109      | CCDC68   | 18 | 50722432 | 6 | 0.594024 |

|                |             |    |          |   |          |
|----------------|-------------|----|----------|---|----------|
| SNP18-50755081 | CCDC68      | 18 | 50755081 | 1 | 1.34099  |
| rs1017253      | FLJ45743    | 18 | 51843614 | 1 | 3.692426 |
| rs12606608     | FLJ45743    | 18 | 52006549 | 3 | 2.942596 |
| rs12606608     | FLJ45743    | 18 | 52006549 | 2 | 2.883066 |
| rs681176       | TXNL1       | 18 | 52456755 | 4 | 0.295664 |
| rs681176       | TXNL1       | 18 | 52456755 | 1 | 0.252352 |
| rs681176       | TXNL1       | 18 | 52456755 | 2 | 0.189204 |
| rs2302845      | WDR7        | 18 | 52599776 | 4 | 0.607664 |
| rs2302845      | WDR7        | 18 | 52599776 | 1 | 0.50522  |
| rs3745072      | ONECUT2     | 18 | 53295033 | 3 | 0.286674 |
| rs3745071      | ONECUT2     | 18 | 53295043 | 3 | 0.903129 |
| rs13016        | ALPK2       | 18 | 54299761 | 3 | 1.536842 |
| rs3809983      | ALPK2       | 18 | 54353748 | 8 | 0.624539 |
| rs3809982      | ALPK2       | 18 | 54354054 | 8 | 0.017922 |
| rs3809977      | ALPK2       | 18 | 54354878 | 7 | 0.701448 |
| SNP18-54398580 | ALPK2       | 18 | 54398580 | 1 | 2.023812 |
| SNP18-54518803 | MALT1       | 18 | 54518803 | 4 | 0.728489 |
| SNP18-55091287 | RAX         | 18 | 55091287 | 1 | 2.285005 |
| SNP18-55091287 | RAX         | 18 | 55091287 | 8 | 2.09846  |
| SNP18-55091287 | RAX         | 18 | 55091287 | 3 | 2.22922  |
| rs10871768     | CPLX4       | 18 | 55114099 | 1 | 0.928439 |
| rs7243416      | CPLX4       | 18 | 55114252 | 2 | 3.074495 |
| rs7243416      | CPLX4       | 18 | 55114252 | 1 | 0.541057 |
| rs7243416      | CPLX4       | 18 | 55114252 | 8 | 0.203869 |
| rs7243416      | CPLX4       | 18 | 55114252 | 4 | 1.061255 |
| rs4940456      | CPLX4       | 18 | 55114722 | 2 | 0.527403 |
| rs4940456      | CPLX4       | 18 | 55114722 | 1 | 1.151171 |
| rs9954602      | CCBE1       | 18 | 55253306 | 6 | 1.86007  |
| rs1893515      | LOC728115   | 18 | 55835408 | 3 | 3.103731 |
| rs12955810     | hCG_1659830 | 18 | 56613006 | 3 | 0.329221 |
| rs12964819     | CDH20       | 18 | 57317521 | 4 | 0.680332 |
| rs12964819     | CDH20       | 18 | 57317521 | 5 | 2.185072 |
| rs12964819     | CDH20       | 18 | 57317521 | 2 | 1.515647 |
| rs4362478      | RNF152      | 18 | 57634290 | 3 | 0.509064 |
| SNP18-57931373 | PIGN        | 18 | 57931373 | 8 | 0.354722 |
| SNP18-57931373 | PIGN        | 18 | 57931373 | 1 | 4.777276 |
| rs13381627     | PIGN        | 18 | 57932780 | 1 | 1.806295 |
| rs13381627     | PIGN        | 18 | 57932780 | 3 | 0.679551 |
| rs34227891     | PIGN        | 18 | 57961543 | 3 | 0.583465 |
| rs34227891     | PIGN        | 18 | 57961543 | 6 | 0.360192 |
| rs34227891     | PIGN        | 18 | 57961543 | 4 | 1.022357 |
| rs34227891     | PIGN        | 18 | 57961543 | 1 | 4.686385 |
| rs35211496     | TNFRSF11A   | 18 | 58172741 | 4 | 0.690416 |
| rs35211496     | TNFRSF11A   | 18 | 58172741 | 3 | 0.466346 |
| rs35211496     | TNFRSF11A   | 18 | 58172741 | 2 | 0.417803 |
| rs35211496     | TNFRSF11A   | 18 | 58172741 | 7 | 0.274328 |
| rs35211496     | TNFRSF11A   | 18 | 58172741 | 1 | 0.648418 |

|                |           |    |          |   |          |
|----------------|-----------|----|----------|---|----------|
| rs1805034      | TNFRSF11A | 18 | 58178221 | 8 | 4.916459 |
| rs1805034      | TNFRSF11A | 18 | 58178221 | 1 | 4.043417 |
| rs1805034      | TNFRSF11A | 18 | 58178221 | 7 | 0.407673 |
| rs1805034      | TNFRSF11A | 18 | 58178221 | 5 | 0.352689 |
| rs1805034      | TNFRSF11A | 18 | 58178221 | 4 | 0.219611 |
| rs1805034      | TNFRSF11A | 18 | 58178221 | 6 | 2.273957 |
| rs8092336      | TNFRSF11A | 18 | 58187063 | 8 | 1.998439 |
| rs12956093     | ZCCHC2    | 18 | 58382831 | 3 | 0.66134  |
| rs624821       | PHLPP     | 18 | 58713278 | 3 | 0.649619 |
| rs624821       | PHLPP     | 18 | 58713278 | 5 | 4.979534 |
| rs4987855      | BCL2      | 18 | 58944529 | 8 | 1.658637 |
| rs4987853      | BCL2      | 18 | 58944635 | 5 | 0.222321 |
| rs4987853      | BCL2      | 18 | 58944635 | 4 | 0.702885 |
| rs4987852      | BCL2      | 18 | 58944901 | 4 | 1.091603 |
| rs4987851      | BCL2      | 18 | 58945239 | 7 | 1.214039 |
| rs1564483      | BCL2      | 18 | 58945634 | 3 | 0.302489 |
| rs1564483      | BCL2      | 18 | 58945634 | 5 | 1.131265 |
| rs1016860      | BCL2      | 18 | 58946054 | 5 | 0.136484 |
| rs1016860      | BCL2      | 18 | 58946054 | 4 | 0.304482 |
| rs4987845      | BCL2      | 18 | 58946168 | 8 | 4.725687 |
| rs4987843      | BCL2      | 18 | 58946521 | 5 | 3.710776 |
| rs4987843      | BCL2      | 18 | 58946521 | 4 | 0.532728 |
| rs1801018      | BCL2      | 18 | 59136859 | 5 | 0.637035 |
| rs1801018      | BCL2      | 18 | 59136859 | 1 | 4.631974 |
| rs1801018      | BCL2      | 18 | 59136859 | 3 | 0.839529 |
| rs1801018      | BCL2      | 18 | 59136859 | 6 | 4.009504 |
| rs1395266      | SERPINB11 | 18 | 59541312 | 7 | 1.04861  |
| rs953695       | SERPINB11 | 18 | 59541550 | 7 | 0.561848 |
| rs17781440     | SERPINB7  | 18 | 59593890 | 5 | 0.034313 |
| rs17781440     | SERPINB7  | 18 | 59593890 | 7 | 0.863552 |
| rs6098         | SERPINB2  | 18 | 59715374 | 7 | 0.642627 |
| rs6098         | SERPINB2  | 18 | 59715374 | 5 | 1.423592 |
| rs6102         | SERPINB2  | 18 | 59721450 | 7 | 0.194159 |
| rs6103         | SERPINB2  | 18 | 59721483 | 7 | 0.675271 |
| rs6103         | SERPINB2  | 18 | 59721483 | 5 | 0.957242 |
| rs6104         | SERPINB2  | 18 | 59721509 | 5 | 0.992158 |
| rs6104         | SERPINB2  | 18 | 59721509 | 7 | 0.166226 |
| rs8097425      | SERPINB10 | 18 | 59733847 | 5 | 1.586586 |
| rs8097425      | SERPINB10 | 18 | 59733847 | 7 | 1.103889 |
| rs922210       | C18orf20  | 18 | 59967166 | 5 | 0.902196 |
| rs922210       | C18orf20  | 18 | 59967166 | 3 | 0.381531 |
| rs922210       | C18orf20  | 18 | 59967166 | 7 | 0.353428 |
| SNP18-62362231 | CDH19     | 18 | 62362231 | 1 | 4.108923 |
| SNP18-62362231 | CDH19     | 18 | 62362231 | 8 | 0.334305 |
| SNP18-62362231 | CDH19     | 18 | 62362231 | 5 | 0.777313 |
| rs7227616      | DSEL      | 18 | 63325804 | 1 | 0.345954 |
| rs11151371     | DSEL      | 18 | 63326628 | 8 | 6.521955 |

|                |          |    |          |   |          |
|----------------|----------|----|----------|---|----------|
| rs17077389     | DSEL     | 18 | 63326692 | 6 | 0.158833 |
| rs2187094      | CCDC102B | 18 | 64664595 | 1 | 2.394446 |
| rs2187094      | CCDC102B | 18 | 64664595 | 6 | 0.615249 |
| SNP18-64829172 | CCDC102B | 18 | 64829172 | 7 | 0.717336 |
| rs727088       | CD226    | 18 | 65681419 | 1 | 0.335111 |
| rs763361       | CD226    | 18 | 65682622 | 1 | 0.150095 |
| rs763361       | CD226    | 18 | 65682622 | 3 | 1.060124 |
| rs3911730      | RTTN     | 18 | 66022323 | 7 | 0.207961 |
| rs2231562      | SOCS6    | 18 | 66143259 | 3 | 7.97497  |
| rs7238987      | CYB5A    | 18 | 70079130 | 8 | 0.574175 |
| rs2278156      | C18orf51 | 18 | 70254113 | 5 | 0.095557 |
| rs2278156      | C18orf51 | 18 | 70254113 | 2 | 3.589379 |
| rs2278156      | C18orf51 | 18 | 70254113 | 6 | 2.436137 |
| rs1046406      | C18orf51 | 18 | 70254177 | 6 | 2.164807 |
| rs1046406      | C18orf51 | 18 | 70254177 | 7 | 1.340383 |
| rs1046406      | C18orf51 | 18 | 70254177 | 2 | 4.254221 |
| rs2278155      | C18orf51 | 18 | 70254626 | 8 | 3.992198 |
| rs2278155      | C18orf51 | 18 | 70254626 | 6 | 2.369541 |
| rs3764509      | CNDP2    | 18 | 70318104 | 2 | 4.854691 |
| rs3764509      | CNDP2    | 18 | 70318104 | 7 | 5.109633 |
| rs3764509      | CNDP2    | 18 | 70318104 | 6 | 4.024351 |
| rs3764509      | CNDP2    | 18 | 70318104 | 4 | 0.407157 |
| rs3764509      | CNDP2    | 18 | 70318104 | 1 | 0.20401  |
| rs3764509      | CNDP2    | 18 | 70318104 | 3 | 0.467545 |
| rs3764509      | CNDP2    | 18 | 70318104 | 8 | 0.61055  |
| rs2278161      | CNDP2    | 18 | 70327063 | 8 | 1.451874 |
| rs2278161      | CNDP2    | 18 | 70327063 | 7 | 0.379919 |
| rs2278161      | CNDP2    | 18 | 70327063 | 4 | 0.012117 |
| rs2278161      | CNDP2    | 18 | 70327063 | 6 | 2.893558 |
| rs2278161      | CNDP2    | 18 | 70327063 | 1 | 0.873266 |
| rs11151964     | CNDP1    | 18 | 70352898 | 3 | 0.520195 |
| rs12960862     | CNDP1    | 18 | 70385615 | 6 | 0.767559 |
| rs12960862     | CNDP1    | 18 | 70385615 | 4 | 1.256645 |
| rs12960862     | CNDP1    | 18 | 70385615 | 2 | 3.553653 |
| rs12960862     | CNDP1    | 18 | 70385615 | 5 | 1.916121 |
| SNP18-70389452 | CNDP1    | 18 | 70389452 | 2 | 4.601454 |
| rs2887         | CNDP1    | 18 | 70403117 | 4 | 1.18855  |
| rs2887         | CNDP1    | 18 | 70403117 | 3 | 0.245778 |
| rs632157       | ZADH2    | 18 | 71040536 | 3 | 0.037821 |
| rs632157       | ZADH2    | 18 | 71040536 | 7 | 0.005878 |
| rs3744908      | TSHZ1    | 18 | 71126992 | 6 | 7.283036 |
| rs3744908      | TSHZ1    | 18 | 71126992 | 5 | 0.654132 |
| SNP18-71128347 | TSHZ1    | 18 | 71128347 | 8 | 5.94596  |
| SNP18-71128347 | TSHZ1    | 18 | 71128347 | 5 | 0.454205 |
| SNP18-71128347 | TSHZ1    | 18 | 71128347 | 2 | 6.788959 |
| SNP18-71128347 | TSHZ1    | 18 | 71128347 | 6 | 0.632569 |
| rs11660753     | C18orf62 | 18 | 71251586 | 1 | 0.706297 |



|                |           |    |          |   |          |
|----------------|-----------|----|----------|---|----------|
| rs17059302     | ZNF516    | 18 | 72220706 | 8 | 0.398116 |
| rs3813102      | FLJ44313  | 18 | 72336563 | 8 | 2.038264 |
| rs3813102      | FLJ44313  | 18 | 72336563 | 6 | 1.993019 |
| rs3813102      | FLJ44313  | 18 | 72336563 | 5 | 1.022945 |
| rs470403       | ZNF236    | 18 | 72800756 | 1 | 0.422653 |
| rs470403       | ZNF236    | 18 | 72800756 | 3 | 0.603264 |
| rs470403       | ZNF236    | 18 | 72800756 | 6 | 2.764913 |
| rs470403       | ZNF236    | 18 | 72800756 | 2 | 1.367714 |
| rs17026        | MBP       | 18 | 72819967 | 2 | 4.491949 |
| rs17026        | MBP       | 18 | 72819967 | 3 | 0.472517 |
| rs17026        | MBP       | 18 | 72819967 | 6 | 4.673988 |
| rs7229288      | MBP       | 18 | 72820440 | 6 | 6.074424 |
| rs7229288      | MBP       | 18 | 72820440 | 3 | 0.535146 |
| rs7229288      | MBP       | 18 | 72820440 | 1 | 6.091284 |
| rs7229288      | MBP       | 18 | 72820440 | 8 | 6.832454 |
| rs9199         | MBP       | 18 | 72821324 | 1 | 0.741537 |
| rs9199         | MBP       | 18 | 72821324 | 6 | 0.217139 |
| rs9199         | MBP       | 18 | 72821324 | 3 | 1.133566 |
| rs9199         | MBP       | 18 | 72821324 | 2 | 2.6917   |
| rs2282557      | MBP       | 18 | 72854154 | 6 | 5.2851   |
| rs470871       | MBP       | 18 | 72854336 | 5 | 0.446184 |
| rs7236968      | MBP       | 18 | 72856491 | 6 | 4.628196 |
| rs5374         | GALR1     | 18 | 73091633 | 3 | 0.353035 |
| rs11664381     | ATP9B     | 18 | 75168171 | 8 | 0.624672 |
| rs35099556     | NFATC1    | 18 | 75328542 | 6 | 3.362105 |
| rs599554       | CTDP1     | 18 | 75574074 | 1 | 3.27865  |
| rs2279103      | CTDP1     | 18 | 75574115 | 1 | 4.666087 |
| rs1134231      | LOC440498 | 18 | 75831795 | 3 | 0.961441 |
| rs1134231      | LOC440498 | 18 | 75831795 | 8 | 1.439454 |
| rs1134231      | LOC440498 | 18 | 75831795 | 5 | 2.912496 |
| rs1134231      | LOC440498 | 18 | 75831795 | 4 | 1.403013 |
| SNP18-75995461 | ADNP2     | 18 | 75995461 | 5 | 0.158035 |
| rs3744878      | ADNP2     | 18 | 75996183 | 4 | 0.972277 |
| rs10407115     | PPAP2C    | 19 | 233753   | 5 | 1.225708 |
| rs3764656      | THEG      | 19 | 313283   | 3 | 0.267084 |
| rs10422863     | THEG      | 19 | 318089   | 1 | 2.752152 |
| rs2241407      | FAM148C   | 19 | 356929   | 8 | 0.882055 |
| rs2241407      | FAM148C   | 19 | 356929   | 1 | 0.603157 |
| rs1052882      | C19orf19  | 19 | 414528   | 2 | 0.280551 |
| rs1052882      | C19orf19  | 19 | 414528   | 3 | 0.070321 |
| rs1052882      | C19orf19  | 19 | 414528   | 7 | 0.834916 |
| rs1052882      | C19orf19  | 19 | 414528   | 1 | 1.260759 |
| rs28989772     | BSG       | 19 | 522397   | 1 | 5.46075  |
| rs28989772     | BSG       | 19 | 522397   | 8 | 6.547143 |
| rs6758         | BSG       | 19 | 534460   | 2 | 4.596658 |
| rs1054786      | HCN2      | 19 | 564898   | 6 | 0.395622 |
| rs1054786      | HCN2      | 19 | 564898   | 8 | 4.287092 |

|              |          |    |         |   |          |
|--------------|----------|----|---------|---|----------|
| rs7249518    | FLJ45684 | 19 | 597900  | 5 | 0.687015 |
| rs2074460    | FLJ45684 | 19 | 598039  | 7 | 0.807831 |
| rs2074460    | FLJ45684 | 19 | 598039  | 4 | 0.055898 |
| rs757331     | FLJ45684 | 19 | 598251  | 5 | 2.030537 |
| rs2285751    | RNF126   | 19 | 602852  | 8 | 5.461548 |
| rs13730      | FSTL3    | 19 | 633010  | 1 | 5.249817 |
| rs13730      | FSTL3    | 19 | 633010  | 7 | 0.173376 |
| rs4375794    | PRSSL1   | 19 | 642909  | 1 | 0.44327  |
| rs1050457    | PALM     | 19 | 682144  | 3 | 0.055535 |
| rs1050457    | PALM     | 19 | 682144  | 7 | 0.361205 |
| rs1050457    | PALM     | 19 | 682144  | 1 | 2.51924  |
| SNP19-708752 | C19orf21 | 19 | 708752  | 2 | 4.345933 |
| rs2285696    | C19orf21 | 19 | 714952  | 8 | 7.075985 |
| rs595844     | AZU1     | 19 | 781854  | 7 | 0.343267 |
| rs595844     | AZU1     | 19 | 781854  | 5 | 0.107337 |
| rs351111     | PRTN3    | 19 | 795020  | 3 | 1.308582 |
| rs351111     | PRTN3    | 19 | 795020  | 5 | 0.630536 |
| rs2240154    | GRIN3B   | 19 | 954172  | 2 | 1.917151 |
| SNP19-955740 | GRIN3B   | 19 | 955740  | 1 | 1.818523 |
| rs4806908    | GRIN3B   | 19 | 955823  | 5 | 1.710197 |
| rs4806908    | GRIN3B   | 19 | 955823  | 6 | 0.603305 |
| rs12973948   | GRIN3B   | 19 | 956531  | 6 | 0.282128 |
| rs12973948   | GRIN3B   | 19 | 956531  | 5 | 0.448736 |
| SNP19-960585 | GRIN3B   | 19 | 960585  | 1 | 3.650256 |
| SNP19-960585 | GRIN3B   | 19 | 960585  | 3 | 0.476148 |
| rs4807440    | CNN2     | 19 | 977477  | 1 | 2.630785 |
| rs3752232    | ABCA7    | 19 | 994748  | 4 | 3.180159 |
| rs3752232    | ABCA7    | 19 | 994748  | 3 | 1.192901 |
| SNP19-996173 | ABCA7    | 19 | 996173  | 4 | 0.146737 |
| SNP19-996173 | ABCA7    | 19 | 996173  | 3 | 0.76519  |
| rs3752237    | ABCA7    | 19 | 998161  | 1 | 1.624332 |
| rs3752237    | ABCA7    | 19 | 998161  | 7 | 0.202838 |
| rs3752237    | ABCA7    | 19 | 998161  | 4 | 1.22289  |
| SNP19-998537 | ABCA7    | 19 | 998537  | 3 | 0.097811 |
| SNP19-998537 | ABCA7    | 19 | 998537  | 4 | 3.945299 |
| rs9282560    | ABCA7    | 19 | 999982  | 1 | 4.878987 |
| rs3764652    | ABCA7    | 19 | 1003005 | 2 | 0.153656 |
| rs3764652    | ABCA7    | 19 | 1003005 | 3 | 0.441092 |
| rs3764652    | ABCA7    | 19 | 1003005 | 1 | 1.447787 |
| rs3745842    | ABCA7    | 19 | 1006191 | 2 | 0.039307 |
| rs3745842    | ABCA7    | 19 | 1006191 | 3 | 0.244668 |
| rs3745842    | ABCA7    | 19 | 1006191 | 1 | 1.022229 |
| rs3752246    | ABCA7    | 19 | 1007492 | 5 | 0.647318 |
| rs3752246    | ABCA7    | 19 | 1007492 | 2 | 5.51163  |
| rs1801284    | HMHA1    | 19 | 1019738 | 1 | 1.231721 |
| rs1801284    | HMHA1    | 19 | 1019738 | 2 | 0.423712 |
| rs2074442    | HMHA1    | 19 | 1025000 | 5 | 0.025389 |

|               |           |    |         |   |          |
|---------------|-----------|----|---------|---|----------|
| SNP19-1030959 | HMHA1     | 19 | 1030959 | 6 | 0.099874 |
| SNP19-1030959 | HMHA1     | 19 | 1030959 | 2 | 3.200631 |
| rs10404947    | HMHA1     | 19 | 1032617 | 5 | 0.14421  |
| rs10404947    | HMHA1     | 19 | 1032617 | 1 | 1.365421 |
| rs713041      | GPX4      | 19 | 1057615 | 2 | 3.358946 |
| rs713041      | GPX4      | 19 | 1057615 | 7 | 0.012287 |
| rs713041      | GPX4      | 19 | 1057615 | 4 | 1.366284 |
| rs713041      | GPX4      | 19 | 1057615 | 3 | 0.640557 |
| rs2072280     | SBNO2     | 19 | 1073147 | 7 | 0.043238 |
| rs2072280     | SBNO2     | 19 | 1073147 | 3 | 0.472582 |
| rs2074915     | SBNO2     | 19 | 1078615 | 8 | 0.798638 |
| rs2074915     | SBNO2     | 19 | 1078615 | 3 | 0.123471 |
| rs2074915     | SBNO2     | 19 | 1078615 | 1 | 5.717091 |
| rs12975875    | C19orf23  | 19 | 1219178 | 6 | 4.617178 |
| rs12975875    | C19orf23  | 19 | 1219178 | 7 | 0.689821 |
| rs12975875    | C19orf23  | 19 | 1219178 | 3 | 1.04538  |
| rs757292      | C19orf24  | 19 | 1228275 | 3 | 0.172901 |
| rs757292      | C19orf24  | 19 | 1228275 | 2 | 4.032225 |
| rs757292      | C19orf24  | 19 | 1228275 | 7 | 0.78209  |
| rs757292      | C19orf24  | 19 | 1228275 | 6 | 1.565104 |
| rs713042      | MUM1      | 19 | 1308082 | 3 | 0.168058 |
| rs12608765    | MUM1      | 19 | 1321675 | 4 | 1.585683 |
| rs12608765    | MUM1      | 19 | 1321675 | 7 | 0.48177  |
| rs12608765    | MUM1      | 19 | 1321675 | 6 | 0.396475 |
| rs12608765    | MUM1      | 19 | 1321675 | 8 | 1.397372 |
| rs12608765    | MUM1      | 19 | 1321675 | 2 | 3.899923 |
| rs12608765    | MUM1      | 19 | 1321675 | 1 | 0.407122 |
| rs7251165     | RPS15     | 19 | 1389865 | 6 | 1.26927  |
| rs7251165     | RPS15     | 19 | 1389865 | 1 | 1.11913  |
| rs265278      | APC2      | 19 | 1420030 | 1 | 3.272485 |
| rs265278      | APC2      | 19 | 1420030 | 7 | 2.721041 |
| SNP19-1448547 | REEP6     | 19 | 1448547 | 1 | 4.597543 |
| rs2292449     | LOC126520 | 19 | 1476307 | 3 | 0.606247 |
| rs2256653     | LOC126520 | 19 | 1477539 | 3 | 1.68457  |
| rs12462146    | LOC126520 | 19 | 1486291 | 3 | 2.362917 |
| SNP19-1570350 | TCF3      | 19 | 1570350 | 3 | 0.380894 |
| SNP19-1570350 | TCF3      | 19 | 1570350 | 1 | 5.490839 |
| rs1054597     | ATP8B3    | 19 | 1733189 | 5 | 0.300986 |
| rs1054597     | ATP8B3    | 19 | 1733189 | 2 | 6.146169 |
| rs3764605     | ATP8B3    | 19 | 1735890 | 5 | 0.4347   |
| rs3764605     | ATP8B3    | 19 | 1735890 | 2 | 3.375071 |
| rs3764606     | ATP8B3    | 19 | 1735944 | 5 | 4.443202 |
| rs3764606     | ATP8B3    | 19 | 1735944 | 2 | 4.439507 |
| rs8100856     | ATP8B3    | 19 | 1747166 | 5 | 0.474694 |
| rs45574836    | ATP8B3    | 19 | 1757667 | 1 | 0.015432 |
| rs12609187    | ATP8B3    | 19 | 1762547 | 7 | 0.86031  |
| rs12609187    | ATP8B3    | 19 | 1762547 | 6 | 1.02346  |

|               |          |    |         |   |          |
|---------------|----------|----|---------|---|----------|
| rs2396359     | REXO1    | 19 | 1770125 | 4 | 2.473448 |
| SNP19-1772637 | REXO1    | 19 | 1772637 | 8 | 4.228371 |
| SNP19-1772637 | REXO1    | 19 | 1772637 | 2 | 4.145614 |
| SNP19-1772637 | REXO1    | 19 | 1772637 | 6 | 0.698347 |
| SNP19-1772637 | REXO1    | 19 | 1772637 | 7 | 6.257186 |
| rs3746043     | KLF16    | 19 | 1804667 | 8 | 0.499009 |
| rs3746043     | KLF16    | 19 | 1804667 | 6 | 3.582533 |
| rs3746043     | KLF16    | 19 | 1804667 | 7 | 6.33191  |
| rs12974606    | SCAMP4   | 19 | 1856405 | 1 | 1.257526 |
| rs12974606    | SCAMP4   | 19 | 1856405 | 6 | 0.474126 |
| rs12974606    | SCAMP4   | 19 | 1856405 | 7 | 0.552863 |
| rs11669357    | C19orf34 | 19 | 1903586 | 7 | 0.347094 |
| rs2396366     | C19orf34 | 19 | 1903841 | 1 | 2.599926 |
| rs2396366     | C19orf34 | 19 | 1903841 | 4 | 0.660861 |
| rs2396366     | C19orf34 | 19 | 1903841 | 7 | 0.197313 |
| SNP19-1904495 | C19orf34 | 19 | 1904495 | 3 | 0.730477 |
| SNP19-1904495 | C19orf34 | 19 | 1904495 | 4 | 0.585736 |
| rs1610045     | BTBD2    | 19 | 1948363 | 7 | 0.822404 |
| rs1610045     | BTBD2    | 19 | 1948363 | 8 | 0.037646 |
| rs4476281     | MOBKL2A  | 19 | 2023599 | 5 | 0.409757 |
| rs4476281     | MOBKL2A  | 19 | 2023599 | 6 | 4.819535 |
| rs4476281     | MOBKL2A  | 19 | 2023599 | 8 | 0.862166 |
| rs4476281     | MOBKL2A  | 19 | 2023599 | 2 | 3.522665 |
| rs20567       | AP3D1    | 19 | 2061746 | 5 | 8.38491  |
| rs2523178     | C19orf35 | 19 | 2226079 | 5 | 0.119959 |
| rs3848635     | TMPRSS9  | 19 | 2361332 | 1 | 2.718458 |
| rs8112518     | GNG7     | 19 | 2463151 | 5 | 7.062185 |
| rs8112518     | GNG7     | 19 | 2463151 | 1 | 3.379798 |
| rs8112518     | GNG7     | 19 | 2463151 | 3 | 0.167987 |
| rs7258864     | GNG7     | 19 | 2463606 | 3 | 0.237746 |
| rs7258864     | GNG7     | 19 | 2463606 | 6 | 0.943919 |
| rs917414      | GNG7     | 19 | 2465360 | 6 | 0.079011 |
| rs917414      | GNG7     | 19 | 2465360 | 1 | 1.208384 |
| rs917414      | GNG7     | 19 | 2465360 | 3 | 1.562287 |
| rs917414      | GNG7     | 19 | 2465360 | 5 | 0.302625 |
| rs917415      | GNG7     | 19 | 2465373 | 5 | 0.131805 |
| rs917415      | GNG7     | 19 | 2465373 | 1 | 0.129868 |
| rs917415      | GNG7     | 19 | 2465373 | 3 | 0.400247 |
| rs3752174     | GNG7     | 19 | 2465565 | 3 | 1.106053 |
| rs3752174     | GNG7     | 19 | 2465565 | 1 | 5.776379 |
| rs17755118    | GNG7     | 19 | 2465732 | 6 | 0.056101 |
| rs3764584     | GNG7     | 19 | 2471716 | 3 | 0.701385 |
| rs3764584     | GNG7     | 19 | 2471716 | 5 | 0.545164 |
| rs3764584     | GNG7     | 19 | 2471716 | 8 | 0.241314 |
| rs3764584     | GNG7     | 19 | 2471716 | 1 | 5.496488 |
| rs8737        | DIRAS1   | 19 | 2665720 | 1 | 2.841337 |
| rs8737        | DIRAS1   | 19 | 2665720 | 5 | 0.26933  |

|               |          |    |         |   |          |
|---------------|----------|----|---------|---|----------|
| rs8737        | DIRAS1   | 19 | 2665720 | 8 | 1.519039 |
| rs3745812     | DIRAS1   | 19 | 2668256 | 8 | 0.859295 |
| rs3745812     | DIRAS1   | 19 | 2668256 | 1 | 4.530144 |
| rs9160        | SLC39A3  | 19 | 2683741 | 6 | 8.03552  |
| rs9160        | SLC39A3  | 19 | 2683741 | 8 | 10.61184 |
| rs35301697    | THOP1    | 19 | 2741618 | 5 | 5.441979 |
| rs867169      | ZNF554   | 19 | 2784864 | 7 | 0.313869 |
| SNP19-2887535 | ZNF77    | 19 | 2887535 | 5 | 1.69032  |
| rs12609268    | ZNF77    | 19 | 2890396 | 2 | 2.250197 |
| rs17681742    | TLE6     | 19 | 2928599 | 5 | 1.959823 |
| rs17681742    | TLE6     | 19 | 2928599 | 8 | 1.433002 |
| rs17681742    | TLE6     | 19 | 2928599 | 7 | 1.147739 |
| rs3746072     | EDG6     | 19 | 3130884 | 6 | 0.608552 |
| rs312071      | NCLN     | 19 | 3159418 | 8 | 0.301116 |
| rs312071      | NCLN     | 19 | 3159418 | 4 | 0.266055 |
| rs312071      | NCLN     | 19 | 3159418 | 6 | 0.112172 |
| rs312071      | NCLN     | 19 | 3159418 | 1 | 0.449586 |
| rs312071      | NCLN     | 19 | 3159418 | 7 | 3.118643 |
| rs312071      | NCLN     | 19 | 3159418 | 3 | 0.020017 |
| rs312072      | NCLN     | 19 | 3159430 | 8 | 5.198896 |
| rs312072      | NCLN     | 19 | 3159430 | 7 | 0.169353 |
| rs312072      | NCLN     | 19 | 3159430 | 1 | 3.007696 |
| rs312072      | NCLN     | 19 | 3159430 | 3 | 0.751412 |
| rs312072      | NCLN     | 19 | 3159430 | 4 | 2.010251 |
| rs10155       | FZR1     | 19 | 3485842 | 4 | 0.968292 |
| rs10155       | FZR1     | 19 | 3485842 | 2 | 4.341974 |
| rs7248746     | FZR1     | 19 | 3489090 | 2 | 4.157412 |
| rs7248746     | FZR1     | 19 | 3489090 | 4 | 0.819862 |
| rs17348907    | GIPC3    | 19 | 3541334 | 6 | 0.144337 |
| rs17348907    | GIPC3    | 19 | 3541334 | 5 | 0.838838 |
| rs17348907    | GIPC3    | 19 | 3541334 | 3 | 0.241758 |
| SNP19-3562927 | C19orf29 | 19 | 3562927 | 6 | 0.599566 |
| rs2074789     | C19orf29 | 19 | 3564346 | 7 | 0.208837 |
| rs2074789     | C19orf29 | 19 | 3564346 | 3 | 0.05873  |
| rs7255692     | C19orf29 | 19 | 3565403 | 2 | 3.665728 |
| rs2067019     | TJP3     | 19 | 3679609 | 5 | 1.415891 |
| rs2301843     | KIAA1086 | 19 | 3771191 | 4 | 0.435577 |
| rs2301843     | KIAA1086 | 19 | 3771191 | 3 | 0.121604 |
| rs2301843     | KIAA1086 | 19 | 3771191 | 1 | 0.193114 |
| rs2240233     | KIAA1086 | 19 | 3782525 | 5 | 2.657986 |
| rs2240233     | KIAA1086 | 19 | 3782525 | 3 | 1.800669 |
| rs2240233     | KIAA1086 | 19 | 3782525 | 1 | 2.561032 |
| rs2240233     | KIAA1086 | 19 | 3782525 | 7 | 1.2567   |
| rs2240233     | KIAA1086 | 19 | 3782525 | 4 | 1.793662 |
| rs10424392    | ATCAY    | 19 | 3876413 | 3 | 0.451439 |
| rs16992128    | ITGB1BP3 | 19 | 3884124 | 4 | 4.408758 |
| rs10419272    | DAPK3    | 19 | 3909708 | 3 | 0.776877 |

|               |          |    |         |   |          |
|---------------|----------|----|---------|---|----------|
| rs10419272    | DAPK3    | 19 | 3909708 | 4 | 0.140244 |
| rs3745982     | DAPK3    | 19 | 3909895 | 3 | 0.185394 |
| rs3745982     | DAPK3    | 19 | 3909895 | 4 | 0.38441  |
| rs36527       | EEF2     | 19 | 3928486 | 5 | 1.690909 |
| rs17851657    | MAP2K2   | 19 | 4053449 | 3 | 0.738078 |
| rs17851657    | MAP2K2   | 19 | 4053449 | 7 | 0.526686 |
| rs2240669     | ANKRD24  | 19 | 4158940 | 6 | 0.404228 |
| rs2240669     | ANKRD24  | 19 | 4158940 | 7 | 0.406172 |
| rs12978469    | ANKRD24  | 19 | 4161356 | 3 | 0.355485 |
| rs12978469    | ANKRD24  | 19 | 4161356 | 5 | 1.277127 |
| SNP19-4167910 | ANKRD24  | 19 | 4167910 | 6 | 0.454814 |
| SNP19-4167910 | ANKRD24  | 19 | 4167910 | 4 | 0.290733 |
| SNP19-4167910 | ANKRD24  | 19 | 4167910 | 3 | 0.132138 |
| rs4905        | EBI3     | 19 | 4188067 | 2 | 0.567852 |
| rs4905        | EBI3     | 19 | 4188067 | 1 | 1.013413 |
| rs4905        | EBI3     | 19 | 4188067 | 4 | 0.049447 |
| rs888932      | TMIGD2   | 19 | 4243597 | 5 | 0.121278 |
| SNP19-4245623 | TMIGD2   | 19 | 4245623 | 5 | 0.465229 |
| SNP19-4245623 | TMIGD2   | 19 | 4245623 | 8 | 0.5115   |
| SNP19-4245807 | TMIGD2   | 19 | 4245807 | 5 | 2.262713 |
| SNP19-4245807 | TMIGD2   | 19 | 4245807 | 8 | 2.841837 |
| rs4807578     | FSD1     | 19 | 4257311 | 7 | 0.379605 |
| rs7247504     | STAP2    | 19 | 4284711 | 7 | 0.057986 |
| rs7247504     | STAP2    | 19 | 4284711 | 3 | 0.044244 |
| rs7247504     | STAP2    | 19 | 4284711 | 4 | 2.029702 |
| rs7247504     | STAP2    | 19 | 4284711 | 5 | 4.240654 |
| SNP19-4310191 | MPND     | 19 | 4310191 | 7 | 0.295683 |
| SNP19-4310191 | MPND     | 19 | 4310191 | 3 | 0.031898 |
| rs34148381    | CHAF1A   | 19 | 4360756 | 8 | 0.481048 |
| rs34148381    | CHAF1A   | 19 | 4360756 | 6 | 0.197967 |
| rs9352        | CHAF1A   | 19 | 4393336 | 6 | 0.870308 |
| rs9352        | CHAF1A   | 19 | 4393336 | 1 | 0.482332 |
| rs1044510     | UBXD1    | 19 | 4408650 | 8 | 0.160513 |
| rs1044510     | UBXD1    | 19 | 4408650 | 2 | 1.519491 |
| rs1044510     | UBXD1    | 19 | 4408650 | 1 | 0.601615 |
| rs892161      | HDGF2    | 19 | 4444708 | 1 | 0.690591 |
| rs11878277    | HDGF2    | 19 | 4449000 | 3 | 0.075412 |
| rs11878277    | HDGF2    | 19 | 4449000 | 7 | 0.831617 |
| rs13041       | KIAA1881 | 19 | 4453282 | 5 | 0.172602 |
| rs13041       | KIAA1881 | 19 | 4453282 | 8 | 0.671998 |
| rs13041       | KIAA1881 | 19 | 4453282 | 6 | 6.895957 |
| rs13041       | KIAA1881 | 19 | 4453282 | 7 | 1.242646 |
| rs35929524    | KIAA1881 | 19 | 4454169 | 7 | 1.017403 |
| rs7250947     | KIAA1881 | 19 | 4461530 | 1 | 0.711151 |
| SNP19-4462525 | KIAA1881 | 19 | 4462525 | 6 | 5.229845 |
| SNP19-4462525 | KIAA1881 | 19 | 4462525 | 1 | 3.542686 |
| rs7260518     | KIAA1881 | 19 | 4462955 | 5 | 0.07969  |

|            |          |    |         |   |          |
|------------|----------|----|---------|---|----------|
| rs966384   | LRG1     | 19 | 4489599 | 8 | 1.94591  |
| rs966384   | LRG1     | 19 | 4489599 | 4 | 1.030139 |
| rs966384   | LRG1     | 19 | 4489599 | 2 | 2.469568 |
| rs3760951  | C19orf30 | 19 | 4723463 | 1 | 1.160972 |
| rs3760951  | C19orf30 | 19 | 4723463 | 7 | 0.317372 |
| rs9973235  | M6PRBP1  | 19 | 4798713 | 1 | 0.196003 |
| rs9304915  | M6PRBP1  | 19 | 4798874 | 1 | 0.07212  |
| rs9304915  | M6PRBP1  | 19 | 4798874 | 2 | 6.647682 |
| rs9304915  | M6PRBP1  | 19 | 4798874 | 8 | 0.281371 |
| rs2271058  | M6PRBP1  | 19 | 4803106 | 2 | 8.356177 |
| rs2271058  | M6PRBP1  | 19 | 4803106 | 8 | 6.864767 |
| rs2271058  | M6PRBP1  | 19 | 4803106 | 1 | 0.175576 |
| rs262560   | M6PRBP1  | 19 | 4818650 | 7 | 5.307875 |
| rs262560   | M6PRBP1  | 19 | 4818650 | 6 | 4.948808 |
| rs262560   | M6PRBP1  | 19 | 4818650 | 3 | 0.73296  |
| rs2656938  | ARRDC5   | 19 | 4841914 | 4 | 2.092251 |
| rs2656938  | ARRDC5   | 19 | 4841914 | 5 | 0.66304  |
| rs2656938  | ARRDC5   | 19 | 4841914 | 1 | 4.089605 |
| rs2656927  | C19orf31 | 19 | 4859275 | 1 | 5.494555 |
| rs2656927  | C19orf31 | 19 | 4859275 | 5 | 3.292523 |
| rs2656927  | C19orf31 | 19 | 4859275 | 8 | 0.303579 |
| rs2261988  | UHRF1    | 19 | 4861889 | 4 | 0.383531 |
| rs2261988  | UHRF1    | 19 | 4861889 | 1 | 0.450732 |
| GA015633   | UHRF1    | 19 | 4861924 | 1 | 1.046869 |
| GA015633   | UHRF1    | 19 | 4861924 | 4 | 1.625373 |
| GA015633   | UHRF1    | 19 | 4861924 | 2 | 4.97747  |
| rs2307205  | UHRF1    | 19 | 4881838 | 8 | 4.877327 |
| rs2307213  | UHRF1    | 19 | 4901770 | 3 | 0.799269 |
| rs2307213  | UHRF1    | 19 | 4901770 | 4 | 8.680738 |
| rs2307213  | UHRF1    | 19 | 4901770 | 7 | 1.093641 |
| rs2307213  | UHRF1    | 19 | 4901770 | 5 | 2.110253 |
| rs2307213  | UHRF1    | 19 | 4901770 | 6 | 2.677959 |
| rs2307213  | UHRF1    | 19 | 4901770 | 1 | 0.631876 |
| rs2240678  | JMJD2B   | 19 | 4992178 | 5 | 6.629533 |
| rs17179181 | JMJD2B   | 19 | 5088298 | 1 | 0.457342 |
| rs17179181 | JMJD2B   | 19 | 5088298 | 2 | 0.735659 |
| rs4456628  | PTPRS    | 19 | 5157622 | 6 | 0.546006 |
| rs4456628  | PTPRS    | 19 | 5157622 | 8 | 5.577145 |
| rs1143700  | PTPRS    | 19 | 5157775 | 6 | 0.491718 |
| rs1143700  | PTPRS    | 19 | 5157775 | 1 | 3.885801 |
| rs2230611  | PTPRS    | 19 | 5163482 | 5 | 0.003653 |
| rs2240744  | ZNRF4    | 19 | 5406735 | 3 | 0.831898 |
| rs420325   | ZNRF4    | 19 | 5406796 | 2 | 4.029711 |
| rs420325   | ZNRF4    | 19 | 5406796 | 5 | 3.041585 |
| rs420325   | ZNRF4    | 19 | 5406796 | 3 | 2.539495 |
| rs420325   | ZNRF4    | 19 | 5406796 | 4 | 2.066665 |
| rs8111108  | ZNRF4    | 19 | 5407450 | 5 | 0.812265 |

|               |          |    |         |   |          |
|---------------|----------|----|---------|---|----------|
| rs8111108     | ZNRF4    | 19 | 5407450 | 2 | 0.408623 |
| rs8111108     | ZNRF4    | 19 | 5407450 | 4 | 0.161722 |
| rs8111108     | ZNRF4    | 19 | 5407450 | 3 | 0.712832 |
| rs10451477    | PLAC2    | 19 | 5511812 | 7 | 0.083318 |
| rs10451477    | PLAC2    | 19 | 5511812 | 5 | 0.022333 |
| rs2288947     | PLAC2    | 19 | 5513115 | 3 | 0.709623 |
| rs2288947     | PLAC2    | 19 | 5513115 | 7 | 0.263929 |
| SNP19-5555875 | SAFB2    | 19 | 5555875 | 5 | 0.668074 |
| rs806706      | SAFB2    | 19 | 5561045 | 3 | 0.069646 |
| rs2290776     | DUS3L    | 19 | 5742167 | 8 | 2.249138 |
| rs2290776     | DUS3L    | 19 | 5742167 | 3 | 1.699564 |
| rs12986368    | FUT6     | 19 | 5781922 | 3 | 0.488465 |
| rs778798      | FUT6     | 19 | 5790613 | 7 | 4.202779 |
| rs778981      | FUT5     | 19 | 5817036 | 5 | 0.387398 |
| rs1056987     | NDUFA11  | 19 | 5854936 | 5 | 3.576886 |
| rs1056987     | NDUFA11  | 19 | 5854936 | 6 | 2.875631 |
| SNP19-5859969 | VMAC     | 19 | 5859969 | 2 | 4.952182 |
| rs1046391     | RFX2     | 19 | 5944896 | 2 | 4.055181 |
| rs2288847     | RFX2     | 19 | 5958724 | 8 | 0.221207 |
| rs2288846     | RFX2     | 19 | 5993059 | 7 | 0.277893 |
| rs2288846     | RFX2     | 19 | 5993059 | 6 | 0.185753 |
| rs2288846     | RFX2     | 19 | 5993059 | 1 | 5.409034 |
| rs16993453    | ACSBG2   | 19 | 6138657 | 8 | 1.432478 |
| rs16993453    | ACSBG2   | 19 | 6138657 | 3 | 0.617351 |
| rs16993553    | ASAH3    | 19 | 6284476 | 8 | 1.433236 |
| rs16993553    | ASAH3    | 19 | 6284476 | 3 | 2.022981 |
| rs1049343     | CLPP     | 19 | 6319874 | 4 | 0.10489  |
| rs2304198     | PSPN     | 19 | 6326831 | 4 | 0.992833 |
| rs12984546    | SLC25A41 | 19 | 6377277 | 3 | 0.362441 |
| rs12984546    | SLC25A41 | 19 | 6377277 | 4 | 0.784579 |
| rs3760750     | SLC25A41 | 19 | 6378408 | 6 | 2.179175 |
| rs34488963    | SLC25A41 | 19 | 6381106 | 5 | 1.357269 |
| rs348362      | CRB3     | 19 | 6417482 | 3 | 0.899133 |
| SNP19-6419331 | DENND1C  | 19 | 6419331 | 5 | 0.286854 |
| SNP19-6419331 | DENND1C  | 19 | 6419331 | 8 | 0.118581 |
| SNP19-6419331 | DENND1C  | 19 | 6419331 | 2 | 7.660585 |
| rs1053395     | TUBB4    | 19 | 6445371 | 3 | 0.932612 |
| rs1053395     | TUBB4    | 19 | 6445371 | 8 | 0.926927 |
| rs1053377     | TUBB4    | 19 | 6445502 | 5 | 0.443046 |
| rs3099129     | TUBB4    | 19 | 6445915 | 2 | 3.488366 |
| rs3099129     | TUBB4    | 19 | 6445915 | 1 | 0.102495 |
| rs3099129     | TUBB4    | 19 | 6445915 | 6 | 0.792647 |
| rs3099129     | TUBB4    | 19 | 6445915 | 5 | 0.316299 |
| rs3099129     | TUBB4    | 19 | 6445915 | 4 | 0.415893 |
| rs3099129     | TUBB4    | 19 | 6445915 | 3 | 0.182392 |
| rs3760746     | TNFSF14  | 19 | 6621529 | 1 | 3.210857 |
| rs17030       | C3       | 19 | 6628989 | 1 | 1.787764 |



|               |          |    |         |   |          |
|---------------|----------|----|---------|---|----------|
| rs428453      | C3       | 19 | 6653157 | 1 | 0.45363  |
| rs428453      | C3       | 19 | 6653157 | 2 | 0.866649 |
| rs428453      | C3       | 19 | 6653157 | 5 | 0.064142 |
| rs428453      | C3       | 19 | 6653157 | 7 | 0.075447 |
| rs428453      | C3       | 19 | 6653157 | 6 | 0.292972 |
| rs2230203     | C3       | 19 | 6661782 | 6 | 0.583111 |
| rs2230203     | C3       | 19 | 6661782 | 3 | 0.666497 |
| rs2230203     | C3       | 19 | 6661782 | 7 | 0.342872 |
| rs4807897     | GPR108   | 19 | 6687607 | 3 | 1.086621 |
| rs4807897     | GPR108   | 19 | 6687607 | 8 | 3.712592 |
| rs340138      | GPR108   | 19 | 6688481 | 7 | 0.069368 |
| rs36097961    | VAV1     | 19 | 6801767 | 2 | 4.694083 |
| rs36097961    | VAV1     | 19 | 6801767 | 4 | 6.230262 |
| rs443658      | EMR1     | 19 | 6854920 | 2 | 2.085181 |
| rs457857      | EMR1     | 19 | 6864811 | 7 | 1.413314 |
| rs457857      | EMR1     | 19 | 6864811 | 1 | 1.900823 |
| rs4807916     | EMR1     | 19 | 6877378 | 1 | 2.806138 |
| rs1051690     | INSR     | 19 | 7067963 | 8 | 8.396664 |
| rs2963        | INSR     | 19 | 7114154 | 1 | 3.670057 |
| rs9282756     | INSR     | 19 | 7117388 | 1 | 4.625956 |
| rs9282756     | INSR     | 19 | 7117388 | 8 | 9.653456 |
| rs891087      | INSR     | 19 | 7135518 | 1 | 4.550414 |
| rs891087      | INSR     | 19 | 7135518 | 8 | 4.788666 |
| rs2287915     | ARHGEF18 | 19 | 7430855 | 8 | 0.03979  |
| rs2287915     | ARHGEF18 | 19 | 7430855 | 5 | 5.794118 |
| rs2287915     | ARHGEF18 | 19 | 7430855 | 2 | 4.002888 |
| SNP19-7439850 | ARHGEF18 | 19 | 7439850 | 4 | 0.216819 |
| rs685034      | C19orf45 | 19 | 7476978 | 3 | 0.104131 |
| rs685034      | C19orf45 | 19 | 7476978 | 8 | 1.682786 |
| rs685034      | C19orf45 | 19 | 7476978 | 6 | 0.052825 |
| rs685034      | C19orf45 | 19 | 7476978 | 4 | 0.275148 |
| rs3826736     | C19orf45 | 19 | 7477030 | 7 | 0.628834 |
| rs3826736     | C19orf45 | 19 | 7477030 | 2 | 0.779354 |
| rs3826736     | C19orf45 | 19 | 7477030 | 1 | 0.358471 |
| rs3826736     | C19orf45 | 19 | 7477030 | 8 | 0.648605 |
| rs1133378     | C19orf45 | 19 | 7479287 | 7 | 0.235734 |
| rs1133378     | C19orf45 | 19 | 7479287 | 8 | 0.314783 |
| rs1133378     | C19orf45 | 19 | 7479287 | 1 | 1.136759 |
| rs1133378     | C19orf45 | 19 | 7479287 | 2 | 2.253488 |
| rs608144      | C19orf45 | 19 | 7479297 | 7 | 0.930845 |
| rs608144      | C19orf45 | 19 | 7479297 | 1 | 0.461437 |
| rs608144      | C19orf45 | 19 | 7479297 | 8 | 0.591317 |
| SNP19-7490483 | ZNF358   | 19 | 7490483 | 1 | 2.937629 |
| SNP19-7512908 | PNPLA6   | 19 | 7512908 | 4 | 3.851665 |
| SNP19-7512908 | PNPLA6   | 19 | 7512908 | 3 | 1.11967  |
| SNP19-7512908 | PNPLA6   | 19 | 7512908 | 6 | 6.498743 |
| SNP19-7512908 | PNPLA6   | 19 | 7512908 | 7 | 0.907804 |

|               |             |    |         |   |          |
|---------------|-------------|----|---------|---|----------|
| SNP19-7512908 | PNPLA6      | 19 | 7512908 | 1 | 2.517743 |
| rs4134809     | XAB2        | 19 | 7600393 | 5 | 0.20822  |
| rs4134809     | XAB2        | 19 | 7600393 | 3 | 1.036732 |
| rs4134809     | XAB2        | 19 | 7600393 | 6 | 6.786782 |
| rs4134809     | XAB2        | 19 | 7600393 | 1 | 5.237111 |
| SNP19-7649821 | C19orf59    | 19 | 7649821 | 4 | 1.027492 |
| SNP19-7649821 | C19orf59    | 19 | 7649821 | 8 | 0.899724 |
| SNP19-7668440 | FCER2       | 19 | 7668440 | 5 | 0.523036 |
| SNP19-7668440 | FCER2       | 19 | 7668440 | 3 | 2.223737 |
| GA015756      | EVI5L       | 19 | 7822620 | 6 | 5.148854 |
| rs2288430     | EVI5L       | 19 | 7834727 | 6 | 0.123471 |
| rs2288430     | EVI5L       | 19 | 7834727 | 1 | 3.160301 |
| rs2288430     | EVI5L       | 19 | 7834727 | 8 | 6.713848 |
| rs2288430     | EVI5L       | 19 | 7834727 | 7 | 0.576621 |
| rs11260038    | hCG_2003956 | 19 | 7850849 | 1 | 1.850497 |
| rs11260038    | hCG_2003956 | 19 | 7850849 | 4 | 1.396199 |
| SNP19-7869949 | LRR8E       | 19 | 7869949 | 5 | 6.257359 |
| SNP19-7869949 | LRR8E       | 19 | 7869949 | 7 | 0.548629 |
| SNP19-7869949 | LRR8E       | 19 | 7869949 | 8 | 0.52376  |
| SNP19-7869949 | LRR8E       | 19 | 7869949 | 6 | 1.435761 |
| rs3745383     | LRR8E       | 19 | 7871339 | 6 | 0.153561 |
| rs2303701     | MAP2K7      | 19 | 7881586 | 6 | 4.811632 |
| rs3745386     | MAP2K7      | 19 | 7883870 | 8 | 5.25858  |
| rs3745386     | MAP2K7      | 19 | 7883870 | 2 | 0.317727 |
| rs3745386     | MAP2K7      | 19 | 7883870 | 1 | 0.62789  |
| rs7788        | SNAPC2      | 19 | 7894117 | 2 | 1.19628  |
| rs7788        | SNAPC2      | 19 | 7894117 | 8 | 1.561296 |
| rs7899        | TIMM44      | 19 | 7897679 | 1 | 5.015882 |
| rs7899        | TIMM44      | 19 | 7897679 | 5 | 0.509956 |
| rs7899        | TIMM44      | 19 | 7897679 | 4 | 0.380651 |
| rs4804244     | ELAVL1      | 19 | 7933055 | 3 | 0.08772  |
| rs4804244     | ELAVL1      | 19 | 7933055 | 4 | 6.179094 |
| rs4804244     | ELAVL1      | 19 | 7933055 | 2 | 3.529903 |
| rs4804244     | ELAVL1      | 19 | 7933055 | 1 | 0.864949 |
| rs4804244     | ELAVL1      | 19 | 7933055 | 7 | 0.651969 |
| SNP19-8027096 | CCL25       | 19 | 8027096 | 2 | 1.843566 |
| rs1129763     | CCL25       | 19 | 8027369 | 6 | 0.042391 |
| rs2303164     | CCL25       | 19 | 8028737 | 5 | 0.876483 |
| rs2303164     | CCL25       | 19 | 8028737 | 7 | 0.3395   |
| rs2303164     | CCL25       | 19 | 8028737 | 3 | 2.209568 |
| rs41320348    | CCL25       | 19 | 8033523 | 2 | 0.821671 |
| rs3848570     | FBN3        | 19 | 8051928 | 7 | 2.918941 |
| rs7245429     | FBN3        | 19 | 8065362 | 6 | 0.888353 |
| rs7245429     | FBN3        | 19 | 8065362 | 2 | 2.723689 |
| rs7245429     | FBN3        | 19 | 8065362 | 3 | 0.384762 |
| rs7245429     | FBN3        | 19 | 8065362 | 5 | 0.742893 |
| rs12608849    | FBN3        | 19 | 8066334 | 6 | 1.949696 |

|               |          |    |         |   |          |
|---------------|----------|----|---------|---|----------|
| rs12608849    | FBN3     | 19 | 8066334 | 5 | 1.235122 |
| rs12608849    | FBN3     | 19 | 8066334 | 2 | 6.33435  |
| SNP19-8066897 | FBN3     | 19 | 8066897 | 8 | 1.079605 |
| SNP19-8066897 | FBN3     | 19 | 8066897 | 3 | 0.208512 |
| rs33967815    | FBN3     | 19 | 8074545 | 3 | 0.895417 |
| rs33967815    | FBN3     | 19 | 8074545 | 7 | 0.994047 |
| rs33967815    | FBN3     | 19 | 8074545 | 6 | 1.544955 |
| rs33967815    | FBN3     | 19 | 8074545 | 5 | 0.8906   |
| rs17160196    | FBN3     | 19 | 8082009 | 7 | 0.70146  |
| rs3813778     | FBN3     | 19 | 8097401 | 3 | 0.523223 |
| rs3813778     | FBN3     | 19 | 8097401 | 5 | 1.334469 |
| rs3813778     | FBN3     | 19 | 8097401 | 6 | 0.825311 |
| rs3813778     | FBN3     | 19 | 8097401 | 7 | 1.297101 |
| rs12974280    | FBN3     | 19 | 8102508 | 3 | 0.246741 |
| rs12974280    | FBN3     | 19 | 8102508 | 5 | 1.137921 |
| rs12974280    | FBN3     | 19 | 8102508 | 7 | 0.630411 |
| rs7246376     | FBN3     | 19 | 8109328 | 4 | 0.195467 |
| rs12891       | LASS4    | 19 | 8233196 | 2 | 0.675451 |
| rs12891       | LASS4    | 19 | 8233196 | 1 | 0.304535 |
| rs12891       | LASS4    | 19 | 8233196 | 3 | 1.179802 |
| rs12891       | LASS4    | 19 | 8233196 | 8 | 5.087739 |
| rs12891       | LASS4    | 19 | 8233196 | 6 | 0.090858 |
| rs12981073    | ANKRD47  | 19 | 8295405 | 8 | 1.416369 |
| rs12981073    | ANKRD47  | 19 | 8295405 | 4 | 1.35096  |
| rs12981073    | ANKRD47  | 19 | 8295405 | 5 | 0.628357 |
| rs1019757     | ANKRD47  | 19 | 8295520 | 8 | 5.82164  |
| SNP19-8304006 | KANK3    | 19 | 8304006 | 8 | 2.404635 |
| SNP19-8304006 | KANK3    | 19 | 8304006 | 4 | 1.153166 |
| rs8106699     | ANKRD47  | 19 | 8305272 | 4 | 0.710577 |
| rs8106699     | ANKRD47  | 19 | 8305272 | 5 | 0.0027   |
| rs8106699     | ANKRD47  | 19 | 8305272 | 8 | 0.117503 |
| rs710949      | ANKRD47  | 19 | 8305628 | 5 | 1.620787 |
| rs710949      | ANKRD47  | 19 | 8305628 | 1 | 2.736063 |
| rs890853      | ANKRD47  | 19 | 8305635 | 4 | 0.95655  |
| rs11882865    | 2-Mar    | 19 | 8392884 | 1 | 0.93239  |
| rs11882865    | 2-Mar    | 19 | 8392884 | 3 | 0.979148 |
| rs2910443     | ZNF414   | 19 | 8482307 | 1 | 4.637251 |
| rs2910443     | ZNF414   | 19 | 8482307 | 8 | 0.806796 |
| rs2910443     | ZNF414   | 19 | 8482307 | 5 | 3.90706  |
| rs2910443     | ZNF414   | 19 | 8482307 | 3 | 1.304144 |
| rs2910443     | ZNF414   | 19 | 8482307 | 6 | 3.679183 |
| rs2287863     | ZNF414   | 19 | 8485011 | 2 | 0.55998  |
| rs1054623     | MYO1F    | 19 | 8492086 | 2 | 5.352942 |
| rs4476282     | ADAMTS10 | 19 | 8557562 | 6 | 0.576476 |
| rs2340550     | MGC33407 | 19 | 8669942 | 4 | 1.889868 |
| rs2340550     | MGC33407 | 19 | 8669942 | 7 | 3.103667 |
| rs2340550     | MGC33407 | 19 | 8669942 | 3 | 0.110866 |

|               |          |    |         |   |          |
|---------------|----------|----|---------|---|----------|
| rs2340550     | MGC33407 | 19 | 8669942 | 2 | 1.723136 |
| rs2340550     | MGC33407 | 19 | 8669942 | 1 | 2.129345 |
| rs1035442     | MUC16    | 19 | 8822981 | 3 | 0.886214 |
| SNP19-8854018 | MUC16    | 19 | 8854018 | 2 | 1.169002 |
| SNP19-8854018 | MUC16    | 19 | 8854018 | 1 | 0.790633 |
| SNP19-8854018 | MUC16    | 19 | 8854018 | 6 | 0.68846  |
| SNP19-8864645 | MUC16    | 19 | 8864645 | 4 | 1.04858  |
| SNP19-8864645 | MUC16    | 19 | 8864645 | 2 | 3.352606 |
| SNP19-8867749 | MUC16    | 19 | 8867749 | 7 | 1.095439 |
| SNP19-8867749 | MUC16    | 19 | 8867749 | 4 | 0.30628  |
| SNP19-8867749 | MUC16    | 19 | 8867749 | 5 | 0.786275 |
| SNP19-8867749 | MUC16    | 19 | 8867749 | 8 | 0.9777   |
| SNP19-8889373 | MUC16    | 19 | 8889373 | 3 | 0.707788 |
| SNP19-8889373 | MUC16    | 19 | 8889373 | 5 | 0.678322 |
| SNP19-8889373 | MUC16    | 19 | 8889373 | 7 | 0.240564 |
| SNP19-8889373 | MUC16    | 19 | 8889373 | 4 | 0.206857 |
| SNP19-8906821 | MUC16    | 19 | 8906821 | 6 | 0.699861 |
| SNP19-8906821 | MUC16    | 19 | 8906821 | 2 | 5.432427 |
| rs10415818    | MUC16    | 19 | 8908305 | 2 | 7.175627 |
| rs10415818    | MUC16    | 19 | 8908305 | 5 | 0.753784 |
| rs10415818    | MUC16    | 19 | 8908305 | 6 | 0.35115  |
| rs10415818    | MUC16    | 19 | 8908305 | 1 | 0.676895 |
| SNP19-8909170 | MUC16    | 19 | 8909170 | 2 | 1.751661 |
| SNP19-8909170 | MUC16    | 19 | 8909170 | 1 | 1.005115 |
| SNP19-8909170 | MUC16    | 19 | 8909170 | 5 | 1.205563 |
| SNP19-8909320 | MUC16    | 19 | 8909320 | 3 | 0.481364 |
| SNP19-8909320 | MUC16    | 19 | 8909320 | 7 | 0.408182 |
| SNP19-8909320 | MUC16    | 19 | 8909320 | 1 | 3.987851 |
| SNP19-8909342 | MUC16    | 19 | 8909342 | 6 | 6.234374 |
| SNP19-8909342 | MUC16    | 19 | 8909342 | 4 | 0.638005 |
| SNP19-8909342 | MUC16    | 19 | 8909342 | 5 | 0.434287 |
| SNP19-8909342 | MUC16    | 19 | 8909342 | 2 | 2.702445 |
| SNP19-8909342 | MUC16    | 19 | 8909342 | 7 | 0.354382 |
| SNP19-8909342 | MUC16    | 19 | 8909342 | 3 | 0.136604 |
| rs11883220    | MUC16    | 19 | 8910339 | 2 | 3.651761 |
| rs11883220    | MUC16    | 19 | 8910339 | 3 | 0.041246 |
| rs11883220    | MUC16    | 19 | 8910339 | 7 | 8.105216 |
| SNP19-8910910 | MUC16    | 19 | 8910910 | 3 | 0.217935 |
| SNP19-8910910 | MUC16    | 19 | 8910910 | 1 | 3.12584  |
| SNP19-8910910 | MUC16    | 19 | 8910910 | 7 | 0.370322 |
| SNP19-8917941 | MUC16    | 19 | 8917941 | 5 | 0.913872 |
| SNP19-8917941 | MUC16    | 19 | 8917941 | 2 | 1.608024 |
| SNP19-8917941 | MUC16    | 19 | 8917941 | 6 | 0.134255 |
| SNP19-8917941 | MUC16    | 19 | 8917941 | 1 | 1.026057 |
| SNP19-8918408 | MUC16    | 19 | 8918408 | 4 | 0.633507 |
| rs12459532    | MUC16    | 19 | 8920181 | 4 | 1.083034 |
| SNP19-8920307 | MUC16    | 19 | 8920307 | 4 | 0.50937  |

|               |       |    |         |   |          |
|---------------|-------|----|---------|---|----------|
| SNP19-8920307 | MUC16 | 19 | 8920307 | 8 | 6.942275 |
| rs7508222     | MUC16 | 19 | 8920808 | 4 | 6.57288  |
| SNP19-8921085 | MUC16 | 19 | 8921085 | 4 | 0.664194 |
| SNP19-8921085 | MUC16 | 19 | 8921085 | 5 | 5.131482 |
| SNP19-8921085 | MUC16 | 19 | 8921085 | 3 | 0.486741 |
| SNP19-8921085 | MUC16 | 19 | 8921085 | 2 | 0.278853 |
| SNP19-8921085 | MUC16 | 19 | 8921085 | 1 | 1.272764 |
| SNP19-8921085 | MUC16 | 19 | 8921085 | 8 | 10.61604 |
| SNP19-8921085 | MUC16 | 19 | 8921085 | 7 | 0.675236 |
| SNP19-8921085 | MUC16 | 19 | 8921085 | 6 | 0.176368 |
| rs1820099     | MUC16 | 19 | 8921812 | 4 | 0.697717 |
| rs1862458     | MUC16 | 19 | 8930792 | 3 | 0.325876 |
| rs1862458     | MUC16 | 19 | 8930792 | 1 | 5.091044 |
| rs1344572     | MUC16 | 19 | 8931194 | 6 | 0.68802  |
| SNP19-8931402 | MUC16 | 19 | 8931402 | 3 | 0.190274 |
| SNP19-8931402 | MUC16 | 19 | 8931402 | 2 | 1.272514 |
| SNP19-8931402 | MUC16 | 19 | 8931402 | 4 | 6.050568 |
| SNP19-8931402 | MUC16 | 19 | 8931402 | 5 | 0.891491 |
| SNP19-8931402 | MUC16 | 19 | 8931402 | 8 | 4.597375 |
| SNP19-8931402 | MUC16 | 19 | 8931402 | 7 | 0.211238 |
| SNP19-8931402 | MUC16 | 19 | 8931402 | 6 | 5.622536 |
| rs10422567    | MUC16 | 19 | 8932763 | 6 | 0.634918 |
| SNP19-8933975 | MUC16 | 19 | 8933975 | 3 | 0.519866 |
| SNP19-8933975 | MUC16 | 19 | 8933975 | 1 | 1.366214 |
| SNP19-8933975 | MUC16 | 19 | 8933975 | 7 | 9.461304 |
| SNP19-8935073 | MUC16 | 19 | 8935073 | 7 | 4.121697 |
| SNP19-8935073 | MUC16 | 19 | 8935073 | 1 | 4.757811 |
| SNP19-8935073 | MUC16 | 19 | 8935073 | 3 | 0.000216 |
| rs2547068     | MUC16 | 19 | 8936217 | 7 | 0.939673 |
| rs2547068     | MUC16 | 19 | 8936217 | 3 | 0.499274 |
| rs2547068     | MUC16 | 19 | 8936217 | 8 | 5.576574 |
| rs2547068     | MUC16 | 19 | 8936217 | 5 | 5.120081 |
| rs2547068     | MUC16 | 19 | 8936217 | 6 | 6.012682 |
| rs2547068     | MUC16 | 19 | 8936217 | 2 | 5.140573 |
| rs2591592     | MUC16 | 19 | 8936346 | 8 | 6.458695 |
| rs2591592     | MUC16 | 19 | 8936346 | 7 | 0.404335 |
| rs2591592     | MUC16 | 19 | 8936346 | 6 | 8.681656 |
| rs2591592     | MUC16 | 19 | 8936346 | 1 | 3.693002 |
| rs2591592     | MUC16 | 19 | 8936346 | 3 | 0.439792 |
| SNP19-8936565 | MUC16 | 19 | 8936565 | 4 | 0.239088 |
| rs2547069     | MUC16 | 19 | 8936584 | 3 | 0.076095 |
| rs2547069     | MUC16 | 19 | 8936584 | 7 | 0.026163 |
| rs2547069     | MUC16 | 19 | 8936584 | 5 | 0.111382 |
| rs2547069     | MUC16 | 19 | 8936584 | 6 | 10.96966 |
| rs2547074     | MUC16 | 19 | 8937858 | 6 | 6.60616  |
| rs2547074     | MUC16 | 19 | 8937858 | 2 | 4.156752 |
| rs2547074     | MUC16 | 19 | 8937858 | 3 | 0.977401 |

|               |           |    |          |   |          |
|---------------|-----------|----|----------|---|----------|
| rs2547074     | MUC16     | 19 | 8937858  | 5 | 0.279255 |
| SNP19-8938581 | MUC16     | 19 | 8938581  | 1 | 4.832344 |
| SNP19-8938581 | MUC16     | 19 | 8938581  | 7 | 0.183696 |
| SNP19-8938581 | MUC16     | 19 | 8938581  | 3 | 1.177528 |
| rs2547065     | MUC16     | 19 | 8941462  | 5 | 0.268958 |
| rs2547065     | MUC16     | 19 | 8941462  | 4 | 0.023958 |
| SNP19-8944791 | MUC16     | 19 | 8944791  | 4 | 2.638797 |
| rs1823056     | MUC16     | 19 | 8947819  | 1 | 4.860074 |
| rs1823056     | MUC16     | 19 | 8947819  | 7 | 6.319131 |
| rs1823056     | MUC16     | 19 | 8947819  | 3 | 0.217528 |
| SNP19-8951784 | MUC16     | 19 | 8951784  | 4 | 0.016711 |
| rs4804401     | OR7G2     | 19 | 9074079  | 4 | 1.139859 |
| rs4804401     | OR7G2     | 19 | 9074079  | 1 | 2.304676 |
| rs7246969     | OR7G1     | 19 | 9086940  | 8 | 2.920667 |
| rs7246969     | OR7G1     | 19 | 9086940  | 3 | 1.000473 |
| rs6511918     | OR7D2     | 19 | 9159364  | 3 | 1.338159 |
| rs2240927     | OR7E24    | 19 | 9223343  | 7 | 1.503636 |
| SNP19-9313698 | ZNF559    | 19 | 9313698  | 3 | 0.291234 |
| rs10416984    | ZNF177    | 19 | 9343310  | 1 | 4.554879 |
| rs10416984    | ZNF177    | 19 | 9343310  | 3 | 0.433917 |
| rs10416984    | ZNF177    | 19 | 9343310  | 5 | 0.409796 |
| rs2230752     | ZNF177    | 19 | 9353370  | 5 | 0.118817 |
| rs2230752     | ZNF177    | 19 | 9353370  | 1 | 3.886337 |
| rs2230752     | ZNF177    | 19 | 9353370  | 3 | 0.170065 |
| rs2230752     | ZNF177    | 19 | 9353370  | 6 | 0.272508 |
| rs1978713     | ZNF266    | 19 | 9390783  | 4 | 0.258814 |
| rs1978713     | ZNF266    | 19 | 9390783  | 5 | 1.912803 |
| rs1978713     | ZNF266    | 19 | 9390783  | 1 | 3.916008 |
| rs1978713     | ZNF266    | 19 | 9390783  | 6 | 1.530719 |
| rs2042200     | ZNF426    | 19 | 9507898  | 2 | 2.534158 |
| rs2042200     | ZNF426    | 19 | 9507898  | 3 | 1.211817 |
| rs2303100     | OLFM2     | 19 | 9829434  | 2 | 4.856576 |
| rs2303100     | OLFM2     | 19 | 9829434  | 3 | 0.979613 |
| rs10406152    | COL5A3    | 19 | 9932063  | 7 | 0.941129 |
| rs2287813     | COL5A3    | 19 | 9945292  | 7 | 1.074891 |
| rs2287813     | COL5A3    | 19 | 9945292  | 5 | 0.630288 |
| rs3815745     | COL5A3    | 19 | 9946054  | 4 | 1.063186 |
| rs2161468     | COL5A3    | 19 | 9949271  | 4 | 3.063822 |
| rs7249755     | LOC388503 | 19 | 10015022 | 7 | 0.091309 |
| rs8113341     | LOC388503 | 19 | 10026932 | 8 | 3.923597 |
| rs10417403    | LOC388503 | 19 | 10033516 | 4 | 1.702124 |
| rs10417403    | LOC388503 | 19 | 10033516 | 3 | 2.262207 |
| rs3745601     | P2RY11    | 19 | 10085548 | 1 | 1.887953 |
| rs3745601     | P2RY11    | 19 | 10085548 | 6 | 0.38278  |
| rs3745601     | P2RY11    | 19 | 10085548 | 3 | 0.301989 |
| rs3816556     | P2RY11    | 19 | 10086682 | 1 | 3.504765 |
| rs3816556     | P2RY11    | 19 | 10086682 | 5 | 1.390047 |

|                |           |    |          |   |          |
|----------------|-----------|----|----------|---|----------|
| rs3816556      | P2RY11    | 19 | 10086682 | 8 | 0.418003 |
| rs2305795      | P2RY11    | 19 | 10087052 | 7 | 1.326507 |
| rs2305795      | P2RY11    | 19 | 10087052 | 4 | 0.265179 |
| rs2305795      | P2RY11    | 19 | 10087052 | 1 | 3.854086 |
| rs2305795      | P2RY11    | 19 | 10087052 | 5 | 0.299096 |
| rs721186       | DNMT1     | 19 | 10126312 | 6 | 1.219206 |
| rs721186       | DNMT1     | 19 | 10126312 | 7 | 2.841282 |
| rs2228611      | DNMT1     | 19 | 10128077 | 7 | 0.589013 |
| rs10404517     | LOC646106 | 19 | 10188893 | 6 | 0.350417 |
| rs10404517     | LOC646106 | 19 | 10188893 | 4 | 1.254857 |
| rs10404517     | LOC646106 | 19 | 10188893 | 3 | 0.980746 |
| rs1799969      | ICAM1     | 19 | 10255792 | 8 | 2.596222 |
| rs1799969      | ICAM1     | 19 | 10255792 | 4 | 0.603844 |
| rs5498         | ICAM1     | 19 | 10256683 | 6 | 0.957449 |
| rs5498         | ICAM1     | 19 | 10256683 | 8 | 0.746237 |
| rs3093032      | ICAM1     | 19 | 10257336 | 8 | 5.547666 |
| rs923366       | ICAM1     | 19 | 10258223 | 8 | 1.623421 |
| rs281437       | ICAM1     | 19 | 10258238 | 1 | 1.544224 |
| rs281437       | ICAM1     | 19 | 10258238 | 6 | 0.480127 |
| rs281437       | ICAM1     | 19 | 10258238 | 2 | 0.367376 |
| rs2230399      | ICAM3     | 19 | 10305603 | 7 | 0.159577 |
| rs7258015      | ICAM3     | 19 | 10310358 | 7 | 0.52491  |
| rs7258015      | ICAM3     | 19 | 10310358 | 4 | 0.476547 |
| rs2304240      | ICAM3     | 19 | 10310392 | 6 | 0.709553 |
| rs2304240      | ICAM3     | 19 | 10310392 | 7 | 1.518669 |
| rs281414       | ICAM3     | 19 | 10311285 | 4 | 0.807587 |
| rs12720356     | TYK2      | 19 | 10330975 | 3 | 1.236252 |
| rs280523       | TYK2      | 19 | 10338206 | 1 | 4.787954 |
| rs1051738      | PDE4A     | 19 | 10438843 | 3 | 0.120569 |
| rs1051738      | PDE4A     | 19 | 10438843 | 1 | 5.577988 |
| rs3826709      | KRI1      | 19 | 10531184 | 7 | 0.55976  |
| rs3826709      | KRI1      | 19 | 10531184 | 8 | 0.095624 |
| rs3826709      | KRI1      | 19 | 10531184 | 4 | 0.992722 |
| rs3826709      | KRI1      | 19 | 10531184 | 2 | 5.617808 |
| rs3826709      | KRI1      | 19 | 10531184 | 1 | 0.878603 |
| rs3745249      | KRI1      | 19 | 10531992 | 3 | 0.663464 |
| rs3745249      | KRI1      | 19 | 10531992 | 7 | 0.884458 |
| rs3745249      | KRI1      | 19 | 10531992 | 8 | 0.053989 |
| rs3745249      | KRI1      | 19 | 10531992 | 1 | 0.9288   |
| rs12984043     | KRI1      | 19 | 10533493 | 1 | 0.821694 |
| rs12984043     | KRI1      | 19 | 10533493 | 4 | 0.800725 |
| rs12984043     | KRI1      | 19 | 10533493 | 7 | 0.518713 |
| rs3218222      | KRI1      | 19 | 10537681 | 3 | 0.168972 |
| rs2304163      | AP1M2     | 19 | 10544602 | 5 | 4.47181  |
| rs3745674      | DNM2      | 19 | 10754735 | 5 | 0.955231 |
| SNP19-10895582 | YIPF2     | 19 | 10895582 | 5 | 0.207736 |
| rs17001073     | SMARCA4   | 19 | 10962993 | 3 | 0.29344  |

|                |          |    |          |   |          |
|----------------|----------|----|----------|---|----------|
| rs28997582     | SMARCA4  | 19 | 11006691 | 6 | 1.685225 |
| rs14158        | LDLR     | 19 | 11103044 | 3 | 0.161489 |
| rs14158        | LDLR     | 19 | 11103044 | 2 | 4.084925 |
| rs14158        | LDLR     | 19 | 11103044 | 8 | 0.549055 |
| rs17243011     | LDLR     | 19 | 11103215 | 8 | 7.532562 |
| rs2738464      | LDLR     | 19 | 11103307 | 5 | 0.465864 |
| rs2738464      | LDLR     | 19 | 11103307 | 3 | 0.246302 |
| rs3745681      | ANKRD25  | 19 | 11164943 | 1 | 0.835279 |
| rs3745681      | ANKRD25  | 19 | 11164943 | 8 | 0.609275 |
| rs3745681      | ANKRD25  | 19 | 11164943 | 6 | 0.442248 |
| rs3745681      | ANKRD25  | 19 | 11164943 | 7 | 0.87668  |
| rs3745681      | ANKRD25  | 19 | 11164943 | 2 | 0.13566  |
| rs3745681      | ANKRD25  | 19 | 11164943 | 4 | 0.867958 |
| rs755237       | ANKRD25  | 19 | 11165404 | 6 | 0.139929 |
| rs755237       | ANKRD25  | 19 | 11165404 | 4 | 0.48809  |
| rs755237       | ANKRD25  | 19 | 11165404 | 8 | 0.391188 |
| rs755238       | ANKRD25  | 19 | 11165498 | 4 | 0.027935 |
| rs755238       | ANKRD25  | 19 | 11165498 | 8 | 4.261747 |
| rs755238       | ANKRD25  | 19 | 11165498 | 6 | 0.49274  |
| rs754528       | ANKRD25  | 19 | 11166245 | 8 | 1.1621   |
| rs754528       | ANKRD25  | 19 | 11166245 | 4 | 0.646768 |
| rs754528       | ANKRD25  | 19 | 11166245 | 6 | 1.14858  |
| rs7250778      | ANKRD25  | 19 | 11167265 | 4 | 2.794718 |
| rs7250778      | ANKRD25  | 19 | 11167265 | 6 | 0.051735 |
| rs7250778      | ANKRD25  | 19 | 11167265 | 7 | 0.086137 |
| rs7250778      | ANKRD25  | 19 | 11167265 | 2 | 3.904099 |
| SNP19-11185965 | DOCK6    | 19 | 11185965 | 6 | 0.598262 |
| rs3810307      | DOCK6    | 19 | 11193570 | 8 | 0.469434 |
| rs892066       | LOC55908 | 19 | 11211340 | 1 | 0.602399 |
| rs11667275     | LPPR2    | 19 | 11334358 | 3 | 0.234432 |
| rs2291516      | RGL3     | 19 | 11369177 | 5 | 0.061621 |
| rs2291516      | RGL3     | 19 | 11369177 | 3 | 0.135981 |
| rs10416704     | RGL3     | 19 | 11377007 | 7 | 0.241449 |
| rs167479       | RGL3     | 19 | 11387765 | 1 | 3.554764 |
| rs167479       | RGL3     | 19 | 11387765 | 6 | 1.000475 |
| SNP19-11419275 | PRKCSH   | 19 | 11419275 | 2 | 6.812708 |
| SNP19-11419275 | PRKCSH   | 19 | 11419275 | 7 | 4.926801 |
| SNP19-11419275 | PRKCSH   | 19 | 11419275 | 4 | 1.408835 |
| SNP19-11459224 | ZNF653   | 19 | 11459224 | 3 | 0.6907   |
| rs311805       | ZNF653   | 19 | 11459483 | 3 | 0.354986 |
| rs2305799      | ACP5     | 19 | 11548351 | 2 | 4.129445 |
| rs799193       | ZNF441   | 19 | 11752003 | 8 | 0.34123  |
| rs799193       | ZNF441   | 19 | 11752003 | 1 | 6.053361 |
| rs11670714     | ZNF491   | 19 | 11779878 | 7 | 0.389205 |
| rs11670714     | ZNF491   | 19 | 11779878 | 4 | 0.841245 |
| rs436411       | ZNF440   | 19 | 11803771 | 4 | 0.786861 |
| rs436411       | ZNF440   | 19 | 11803771 | 7 | 0.109564 |



|                |          |    |          |   |          |
|----------------|----------|----|----------|---|----------|
| SNP19-11920645 | ZNF700   | 19 | 11920645 | 5 | 0.941794 |
| rs1975349      | ZNF788   | 19 | 12083861 | 4 | 3.894031 |
| rs1975349      | ZNF788   | 19 | 12083861 | 6 | 0.671697 |
| rs1975349      | ZNF788   | 19 | 12083861 | 7 | 0.260556 |
| rs1975349      | ZNF788   | 19 | 12083861 | 1 | 3.607272 |
| rs1975349      | ZNF788   | 19 | 12083861 | 8 | 3.958713 |
| rs17706075     | ZNF799   | 19 | 12352779 | 3 | 0.495285 |
| rs17706075     | ZNF799   | 19 | 12352779 | 8 | 5.565864 |
| rs17706075     | ZNF799   | 19 | 12352779 | 5 | 0.048211 |
| rs17706075     | ZNF799   | 19 | 12352779 | 6 | 0.173277 |
| rs17706075     | ZNF799   | 19 | 12352779 | 4 | 0.218708 |
| rs11668074     | ZNF799   | 19 | 12352955 | 4 | 1.398551 |
| rs11668074     | ZNF799   | 19 | 12352955 | 5 | 0.447679 |
| rs11668074     | ZNF799   | 19 | 12352955 | 6 | 0.687901 |
| rs11668074     | ZNF799   | 19 | 12352955 | 3 | 0.098279 |
| rs10414984     | ZNF799   | 19 | 12353039 | 3 | 0.509428 |
| rs10414984     | ZNF799   | 19 | 12353039 | 4 | 0.07844  |
| rs3745658      | ZNF443   | 19 | 12412789 | 6 | 0.468293 |
| rs3745658      | ZNF443   | 19 | 12412789 | 3 | 0.867058 |
| rs35836657     | MAN2B1   | 19 | 12629948 | 5 | 0.761743 |
| rs17706412     | BEST2    | 19 | 12726821 | 7 | 1.046777 |
| rs897804       | HOOK2    | 19 | 12737964 | 5 | 0.42244  |
| rs897804       | HOOK2    | 19 | 12737964 | 2 | 5.395012 |
| rs897804       | HOOK2    | 19 | 12737964 | 7 | 0.149199 |
| rs2290688      | MAST1    | 19 | 12819697 | 1 | 3.051613 |
| rs11085822     | MAST1    | 19 | 12846576 | 7 | 0.729677 |
| rs11085822     | MAST1    | 19 | 12846576 | 1 | 2.296352 |
| GA034056       | NFIX     | 19 | 13068284 | 4 | 0.40733  |
| rs8112067      | BTBD14B  | 19 | 13110244 | 1 | 0.035909 |
| rs8112067      | BTBD14B  | 19 | 13110244 | 4 | 6.297724 |
| rs8112067      | BTBD14B  | 19 | 13110244 | 6 | 6.596356 |
| rs8112067      | BTBD14B  | 19 | 13110244 | 3 | 0.231596 |
| rs897790       | NANOS3   | 19 | 13849040 | 6 | 1.063989 |
| rs897790       | NANOS3   | 19 | 13849040 | 1 | 2.732204 |
| rs897790       | NANOS3   | 19 | 13849040 | 5 | 0.532943 |
| rs2016163      | NANOS3   | 19 | 13849416 | 1 | 2.00745  |
| rs2016163      | NANOS3   | 19 | 13849416 | 5 | 0.403841 |
| rs2242130      | C19orf57 | 19 | 13854457 | 6 | 5.169179 |
| rs2242130      | C19orf57 | 19 | 13854457 | 4 | 1.748648 |
| rs2242130      | C19orf57 | 19 | 13854457 | 1 | 6.132773 |
| rs2242130      | C19orf57 | 19 | 13854457 | 5 | 1.004707 |
| rs2305775      | C19orf57 | 19 | 13861870 | 5 | 0.748188 |
| rs2305775      | C19orf57 | 19 | 13861870 | 1 | 3.53898  |
| rs6511898      | C19orf57 | 19 | 13876711 | 5 | 0.023944 |
| rs6511898      | C19orf57 | 19 | 13876711 | 1 | 4.641987 |
| rs6511898      | C19orf57 | 19 | 13876711 | 6 | 3.005732 |
| rs11669628     | CC2D1A   | 19 | 13901896 | 1 | 1.709778 |

|                |         |    |          |   |          |
|----------------|---------|----|----------|---|----------|
| SNP19-14014293 | IL27RA  | 19 | 14014293 | 2 | 2.957391 |
| SNP19-14014293 | IL27RA  | 19 | 14014293 | 7 | 3.003606 |
| SNP19-14014293 | IL27RA  | 19 | 14014293 | 5 | 6.040995 |
| rs3810256      | LPHN1   | 19 | 14120846 | 1 | 5.413409 |
| rs3810256      | LPHN1   | 19 | 14120846 | 4 | 0.795858 |
| rs3810256      | LPHN1   | 19 | 14120846 | 6 | 6.279457 |
| rs11668633     | PTGER1  | 19 | 14444582 | 3 | 1.149841 |
| rs11668633     | PTGER1  | 19 | 14444582 | 1 | 4.293968 |
| rs1803768      | DNAJB1  | 19 | 14487197 | 2 | 4.426433 |
| rs4606855      | EMR3    | 19 | 14630339 | 1 | 0.059447 |
| SNP19-14690749 | ZNF333  | 19 | 14690749 | 2 | 0.690332 |
| SNP19-14690749 | ZNF333  | 19 | 14690749 | 1 | 0.37933  |
| rs757298       | EMR2    | 19 | 14704292 | 3 | 0.005334 |
| rs757299       | EMR2    | 19 | 14704490 | 3 | 0.41494  |
| rs2524383      | EMR2    | 19 | 14723430 | 2 | 6.651659 |
| rs2524383      | EMR2    | 19 | 14723430 | 1 | 0.85621  |
| rs2524383      | EMR2    | 19 | 14723430 | 4 | 0.816553 |
| rs2524383      | EMR2    | 19 | 14723430 | 7 | 3.260198 |
| rs2524383      | EMR2    | 19 | 14723430 | 6 | 0.028914 |
| SNP19-14736388 | EMR2    | 19 | 14736388 | 4 | 5.247858 |
| SNP19-14736388 | EMR2    | 19 | 14736388 | 8 | 6.172343 |
| SNP19-14736388 | EMR2    | 19 | 14736388 | 2 | 0.243932 |
| SNP19-14736388 | EMR2    | 19 | 14736388 | 5 | 1.145744 |
| SNP19-14736388 | EMR2    | 19 | 14736388 | 6 | 0.621454 |
| rs16979912     | OR7C1   | 19 | 14771321 | 4 | 0.763912 |
| rs16979912     | OR7C1   | 19 | 14771321 | 5 | 1.05648  |
| rs17230134     | OR7C1   | 19 | 14771654 | 2 | 3.139628 |
| rs17230134     | OR7C1   | 19 | 14771654 | 1 | 1.055186 |
| rs17230134     | OR7C1   | 19 | 14771654 | 4 | 0.256662 |
| rs17230134     | OR7C1   | 19 | 14771654 | 5 | 4.784847 |
| rs2190686      | OR7A5   | 19 | 14799616 | 5 | 0.61962  |
| rs2190686      | OR7A5   | 19 | 14799616 | 6 | 1.96374  |
| rs11883178     | OR7C2   | 19 | 14913665 | 1 | 4.857505 |
| rs16980148     | SLC1A6  | 19 | 14924757 | 1 | 1.85593  |
| rs16980148     | SLC1A6  | 19 | 14924757 | 4 | 0.798171 |
| rs16980148     | SLC1A6  | 19 | 14924757 | 3 | 0.667947 |
| rs16980148     | SLC1A6  | 19 | 14924757 | 2 | 5.356968 |
| rs16980148     | SLC1A6  | 19 | 14924757 | 7 | 4.577965 |
| rs10424547     | CCDC105 | 19 | 14994787 | 1 | 0.858847 |
| rs8112667      | CCDC105 | 19 | 14994926 | 3 | 0.974165 |
| rs8105737      | OR111   | 19 | 15059631 | 7 | 1.218875 |
| rs16980312     | OR111   | 19 | 15059751 | 3 | 0.188876 |
| rs16980313     | OR111   | 19 | 15059851 | 3 | 2.486408 |
| rs2074262      | ILVBL   | 19 | 15087970 | 1 | 0.608718 |
| rs2074262      | ILVBL   | 19 | 15087970 | 5 | 1.054388 |
| rs12082        | NOTCH3  | 19 | 15131636 | 2 | 0.951165 |
| rs12082        | NOTCH3  | 19 | 15131636 | 1 | 0.467129 |

|                |         |    |          |   |          |
|----------------|---------|----|----------|---|----------|
| rs757291       | ABHD9   | 19 | 15198785 | 6 | 1.575845 |
| rs2304200      | PGLYRP2 | 19 | 15441658 | 3 | 0.616905 |
| SNP19-15443863 | PGLYRP2 | 19 | 15443863 | 2 | 2.761326 |
| SNP19-15443863 | PGLYRP2 | 19 | 15443863 | 1 | 3.092514 |
| rs2280434      | CYP4F22 | 19 | 15523732 | 8 | 1.978279 |
| rs2280434      | CYP4F22 | 19 | 15523732 | 1 | 1.604398 |
| rs4239614      | CYP4F8  | 19 | 15601220 | 4 | 3.119403 |
| rs4239614      | CYP4F8  | 19 | 15601220 | 8 | 3.568482 |
| rs4239614      | CYP4F8  | 19 | 15601220 | 3 | 1.31881  |
| rs4239614      | CYP4F8  | 19 | 15601220 | 6 | 2.742351 |
| rs2239367      | CYP4F8  | 19 | 15601268 | 8 | 2.545582 |
| rs2239367      | CYP4F8  | 19 | 15601268 | 4 | 1.595529 |
| rs2239367      | CYP4F8  | 19 | 15601268 | 3 | 0.934859 |
| rs4019753      | CYP4F8  | 19 | 15601445 | 6 | 1.436745 |
| rs4019753      | CYP4F8  | 19 | 15601445 | 4 | 0.53027  |
| rs4019753      | CYP4F8  | 19 | 15601445 | 1 | 0.192857 |
| rs2733760      | CYP4F3  | 19 | 15631752 | 3 | 0.389908 |
| rs28371511     | CYP4F3  | 19 | 15632028 | 7 | 0.265997 |
| rs28371511     | CYP4F3  | 19 | 15632028 | 6 | 1.901319 |
| rs28371514     | CYP4F3  | 19 | 15632250 | 5 | 1.015234 |
| rs28371514     | CYP4F3  | 19 | 15632250 | 1 | 1.525123 |
| rs7258240      | CYP4F3  | 19 | 15633414 | 4 | 2.451298 |
| rs7258240      | CYP4F3  | 19 | 15633414 | 6 | 1.830125 |
| rs7258240      | CYP4F3  | 19 | 15633414 | 5 | 1.249721 |
| rs7258240      | CYP4F3  | 19 | 15633414 | 1 | 3.356959 |
| rs2947240      | CYP4F3  | 19 | 15633521 | 3 | 0.194546 |
| rs4343408      | CYP4F3  | 19 | 15633530 | 1 | 4.385343 |
| rs4343408      | CYP4F3  | 19 | 15633530 | 5 | 2.628593 |
| rs4343408      | CYP4F3  | 19 | 15633530 | 6 | 1.477376 |
| rs4343408      | CYP4F3  | 19 | 15633530 | 4 | 0.165434 |
| rs10425683     | CYP4F3  | 19 | 15633548 | 1 | 3.265486 |
| rs10425683     | CYP4F3  | 19 | 15633548 | 5 | 0.974921 |
| rs10425683     | CYP4F3  | 19 | 15633548 | 4 | 0.411732 |
| rs4358060      | CYP4F3  | 19 | 15633564 | 4 | 0.2968   |
| rs4358060      | CYP4F3  | 19 | 15633564 | 6 | 0.819144 |
| rs4358060      | CYP4F3  | 19 | 15633564 | 5 | 0.832976 |
| rs4358060      | CYP4F3  | 19 | 15633564 | 1 | 2.864376 |
| rs3204846      | CYP4F3  | 19 | 15633717 | 4 | 0.519199 |
| rs3204846      | CYP4F3  | 19 | 15633717 | 6 | 0.398536 |
| rs3204846      | CYP4F3  | 19 | 15633717 | 1 | 3.043841 |
| rs3204846      | CYP4F3  | 19 | 15633717 | 5 | 1.05915  |
| rs1140863      | CYP4F3  | 19 | 15633738 | 4 | 0.689452 |
| rs1140863      | CYP4F3  | 19 | 15633738 | 6 | 0.492807 |
| rs1140863      | CYP4F3  | 19 | 15633738 | 5 | 1.241855 |
| rs1140863      | CYP4F3  | 19 | 15633738 | 1 | 3.794981 |
| rs28738979     | CYP4F3  | 19 | 15634369 | 4 | 0.058316 |
| rs28738979     | CYP4F3  | 19 | 15634369 | 6 | 2.780185 |

|                |           |    |          |   |          |
|----------------|-----------|----|----------|---|----------|
| rs609636       | CYP4F12   | 19 | 15650098 | 8 | 2.389903 |
| rs609636       | CYP4F12   | 19 | 15650098 | 2 | 2.158475 |
| SNP19-15654235 | CYP4F12   | 19 | 15654235 | 8 | 5.775719 |
| SNP19-15654235 | CYP4F12   | 19 | 15654235 | 2 | 0.744289 |
| SNP19-15654235 | CYP4F12   | 19 | 15654235 | 1 | 6.511417 |
| SNP19-15654235 | CYP4F12   | 19 | 15654235 | 3 | 0.49434  |
| SNP19-15654235 | CYP4F12   | 19 | 15654235 | 4 | 6.994592 |
| rs11670326     | OR10H3    | 19 | 15713544 | 7 | 1.751783 |
| rs11670326     | OR10H3    | 19 | 15713544 | 5 | 2.611523 |
| rs2240229      | OR10H3    | 19 | 15714080 | 1 | 0.488532 |
| rs3746151      | OR10H5    | 19 | 15766639 | 3 | 3.057672 |
| rs3746151      | OR10H5    | 19 | 15766639 | 1 | 3.756166 |
| rs4808383      | OR10H1    | 19 | 15779802 | 3 | 0.351738 |
| rs2108622      | CYP4F2    | 19 | 15851431 | 2 | 0.650634 |
| rs2108622      | CYP4F2    | 19 | 15851431 | 5 | 3.320182 |
| rs2108622      | CYP4F2    | 19 | 15851431 | 7 | 2.950678 |
| rs12459140     | LOC729654 | 19 | 15882888 | 8 | 0.142455 |
| rs12459140     | LOC729654 | 19 | 15882888 | 2 | 0.105981 |
| rs12459140     | LOC729654 | 19 | 15882888 | 1 | 1.381772 |
| rs12610962     | CYP4F11   | 19 | 15884377 | 1 | 0.257739 |
| rs12610962     | CYP4F11   | 19 | 15884377 | 6 | 2.295541 |
| rs12610962     | CYP4F11   | 19 | 15884377 | 2 | 4.990931 |
| rs12610962     | CYP4F11   | 19 | 15884377 | 3 | 2.613692 |
| SNP19-15895714 | CYP4F11   | 19 | 15895714 | 3 | 2.013309 |
| SNP19-15895714 | CYP4F11   | 19 | 15895714 | 8 | 6.086197 |
| SNP19-15895714 | CYP4F11   | 19 | 15895714 | 6 | 3.423732 |
| rs2305800      | CYP4F11   | 19 | 15906294 | 1 | 1.039998 |
| rs2305800      | CYP4F11   | 19 | 15906294 | 5 | 2.346326 |
| rs16980822     | OR10H4    | 19 | 15921248 | 1 | 2.164276 |
| rs16980822     | OR10H4    | 19 | 15921248 | 2 | 0.85945  |
| rs16980822     | OR10H4    | 19 | 15921248 | 5 | 1.866603 |
| rs4808423      | LOC126536 | 19 | 15997405 | 4 | 0.564955 |
| rs4808423      | LOC126536 | 19 | 15997405 | 2 | 0.087895 |
| rs4808423      | LOC126536 | 19 | 15997405 | 5 | 0.004606 |
| rs1043452      | RAB8A     | 19 | 16105326 | 7 | 8.297383 |
| rs1043452      | RAB8A     | 19 | 16105326 | 2 | 0.917929 |
| rs1043452      | RAB8A     | 19 | 16105326 | 6 | 7.73146  |
| rs1043452      | RAB8A     | 19 | 16105326 | 1 | 0.316287 |
| rs6512087      | CIB3      | 19 | 16136655 | 4 | 4.282007 |
| rs6512087      | CIB3      | 19 | 16136655 | 3 | 0.497172 |
| rs6512087      | CIB3      | 19 | 16136655 | 7 | 0.078509 |
| rs9305079      | CALR3     | 19 | 16452464 | 7 | 1.084176 |
| rs9305079      | CALR3     | 19 | 16452464 | 5 | 0.816578 |
| rs8111801      | C19orf44  | 19 | 16492776 | 6 | 5.246058 |
| rs2287869      | SLC35E1   | 19 | 16527101 | 4 | 0.72931  |
| rs2287869      | SLC35E1   | 19 | 16527101 | 1 | 4.849312 |
| rs2287869      | SLC35E1   | 19 | 16527101 | 3 | 0.745443 |

|                |           |    |          |   |          |
|----------------|-----------|----|----------|---|----------|
| rs12983375     | NWD1      | 19 | 16692060 | 1 | 4.678402 |
| rs12983375     | NWD1      | 19 | 16692060 | 6 | 4.847049 |
| SNP19-16703052 | NWD1      | 19 | 16703052 | 8 | 0.011787 |
| SNP19-16703052 | NWD1      | 19 | 16703052 | 1 | 6.025539 |
| SNP19-16703052 | NWD1      | 19 | 16703052 | 4 | 0.237186 |
| rs773905       | F2RL3     | 19 | 16860897 | 7 | 0.059584 |
| rs773902       | F2RL3     | 19 | 16861632 | 1 | 1.536269 |
| rs773902       | F2RL3     | 19 | 16861632 | 7 | 1.018222 |
| rs2227349      | F2RL3     | 19 | 16862551 | 3 | 0.628134 |
| rs2227349      | F2RL3     | 19 | 16862551 | 5 | 1.213299 |
| rs773901       | CPAMD8    | 19 | 16864789 | 7 | 0.494604 |
| rs773901       | CPAMD8    | 19 | 16864789 | 3 | 2.338229 |
| rs773901       | CPAMD8    | 19 | 16864789 | 2 | 0.933897 |
| rs773901       | CPAMD8    | 19 | 16864789 | 5 | 1.365233 |
| rs706761       | CPAMD8    | 19 | 16886292 | 3 | 1.916734 |
| rs706761       | CPAMD8    | 19 | 16886292 | 4 | 0.97521  |
| rs706761       | CPAMD8    | 19 | 16886292 | 1 | 3.528567 |
| rs706761       | CPAMD8    | 19 | 16886292 | 8 | 0.10584  |
| rs2305758      | NY-SAR-48 | 19 | 17024661 | 1 | 0.026373 |
| rs2305758      | NY-SAR-48 | 19 | 17024661 | 7 | 0.472171 |
| rs2305758      | NY-SAR-48 | 19 | 17024661 | 2 | 1.45109  |
| rs12459084     | NY-SAR-48 | 19 | 17031885 | 7 | 0.171764 |
| rs12459084     | NY-SAR-48 | 19 | 17031885 | 1 | 0.588755 |
| rs12459084     | NY-SAR-48 | 19 | 17031885 | 6 | 0.098896 |
| rs12459084     | NY-SAR-48 | 19 | 17031885 | 2 | 0.445995 |
| rs3745349      | MYO9B     | 19 | 17073992 | 5 | 0.969869 |
| rs3745349      | MYO9B     | 19 | 17073992 | 7 | 1.972809 |
| SNP19-17177782 | MYO9B     | 19 | 17177782 | 4 | 0.960027 |
| SNP19-17177782 | MYO9B     | 19 | 17177782 | 2 | 5.663577 |
| rs17535005     | MYO9B     | 19 | 17179018 | 2 | 3.943591 |
| rs1045201      | OCEL1     | 19 | 17198928 | 8 | 6.579294 |
| rs744067       | OCEL1     | 19 | 17200947 | 8 | 7.028817 |
| rs3745168      | USHBP1    | 19 | 17221878 | 2 | 3.457354 |
| rs3745168      | USHBP1    | 19 | 17221878 | 3 | 1.902971 |
| rs3745168      | USHBP1    | 19 | 17221878 | 6 | 3.059317 |
| rs1864116      | ANKRD41   | 19 | 17254015 | 5 | 0.850505 |
| rs2363956      | ANKRD41   | 19 | 17255124 | 3 | 0.579661 |
| rs2363956      | ANKRD41   | 19 | 17255124 | 4 | 0.683243 |
| rs2363956      | ANKRD41   | 19 | 17255124 | 5 | 0.332728 |
| rs891017       | ANKRD41   | 19 | 17255504 | 4 | 1.067767 |
| rs891017       | ANKRD41   | 19 | 17255504 | 3 | 0.292078 |
| rs891017       | ANKRD41   | 19 | 17255504 | 5 | 0.313089 |
| rs891017       | ANKRD41   | 19 | 17255504 | 8 | 0.381191 |
| rs11086065     | ANKRD41   | 19 | 17256003 | 6 | 4.133692 |
| rs11086065     | ANKRD41   | 19 | 17256003 | 4 | 1.722453 |
| rs11086065     | ANKRD41   | 19 | 17256003 | 3 | 0.027228 |
| rs751599       | ANKRD41   | 19 | 17257549 | 3 | 0.303871 |

|                |         |    |          |   |          |
|----------------|---------|----|----------|---|----------|
| rs751599       | ANKRD41 | 19 | 17257549 | 5 | 0.74718  |
| rs751599       | ANKRD41 | 19 | 17257549 | 6 | 0.856809 |
| rs751599       | ANKRD41 | 19 | 17257549 | 4 | 2.538342 |
| rs751599       | ANKRD41 | 19 | 17257549 | 8 | 0.582362 |
| rs10401700     | ANKRD41 | 19 | 17258700 | 4 | 0.8752   |
| rs10401700     | ANKRD41 | 19 | 17258700 | 5 | 0.165723 |
| rs10401700     | ANKRD41 | 19 | 17258700 | 6 | 4.458718 |
| rs10401700     | ANKRD41 | 19 | 17258700 | 3 | 0.240851 |
| SNP19-17273218 | ABHD8   | 19 | 17273218 | 5 | 0.379239 |
| rs10259        | DDA1    | 19 | 17291915 | 2 | 5.117493 |
| rs10259        | DDA1    | 19 | 17291915 | 6 | 4.474352 |
| rs10259        | DDA1    | 19 | 17291915 | 5 | 0.876756 |
| rs1864112      | GTPBP3  | 19 | 17309961 | 5 | 0.809168 |
| rs1864112      | GTPBP3  | 19 | 17309961 | 8 | 2.408564 |
| rs1864112      | GTPBP3  | 19 | 17309961 | 6 | 0.435796 |
| rs1864112      | GTPBP3  | 19 | 17309961 | 7 | 0.219756 |
| rs1864112      | GTPBP3  | 19 | 17309961 | 4 | 0.725793 |
| rs1864112      | GTPBP3  | 19 | 17309961 | 3 | 0.311832 |
| rs3810206      | GTPBP3  | 19 | 17311016 | 7 | 0.408473 |
| rs3810206      | GTPBP3  | 19 | 17311016 | 6 | 0.455214 |
| rs3810206      | GTPBP3  | 19 | 17311016 | 3 | 0.2453   |
| rs3810206      | GTPBP3  | 19 | 17311016 | 4 | 2.417609 |
| rs3810206      | GTPBP3  | 19 | 17311016 | 5 | 0.52229  |
| rs15401        | SLC27A1 | 19 | 17477747 | 1 | 4.179309 |
| rs11878663     | FAM129C | 19 | 17512370 | 3 | 0.23696  |
| SNP19-17521300 | FAM129C | 19 | 17521300 | 6 | 2.44781  |
| SNP19-17521300 | FAM129C | 19 | 17521300 | 5 | 1.212766 |
| SNP19-17521300 | FAM129C | 19 | 17521300 | 8 | 2.343417 |
| SNP19-17521300 | FAM129C | 19 | 17521300 | 7 | 0.661419 |
| SNP19-17523616 | FAM129C | 19 | 17523616 | 5 | 0.232534 |
| rs34631213     | FAM129C | 19 | 17525418 | 3 | 0.257814 |
| rs34631213     | FAM129C | 19 | 17525418 | 5 | 0.285998 |
| rs34631213     | FAM129C | 19 | 17525418 | 6 | 0.613279 |
| rs34631213     | FAM129C | 19 | 17525418 | 7 | 0.182192 |
| rs7250113      | UNC13A  | 19 | 17576183 | 1 | 3.409462 |
| rs7250113      | UNC13A  | 19 | 17576183 | 4 | 1.316185 |
| rs7250113      | UNC13A  | 19 | 17576183 | 7 | 1.678285 |
| rs7250113      | UNC13A  | 19 | 17576183 | 5 | 0.631364 |
| rs7254755      | UNC13A  | 19 | 17577582 | 1 | 0.273103 |
| rs7254755      | UNC13A  | 19 | 17577582 | 4 | 0.546274 |
| rs7254755      | UNC13A  | 19 | 17577582 | 3 | 0.277756 |
| rs7254755      | UNC13A  | 19 | 17577582 | 5 | 0.218866 |
| rs7254755      | UNC13A  | 19 | 17577582 | 7 | 0.571293 |
| SNP19-17627900 | UNC13A  | 19 | 17627900 | 1 | 1.702328 |
| SNP19-17783666 | B3GNT3  | 19 | 17783666 | 8 | 5.430233 |
| rs265539       | B3GNT3  | 19 | 17784160 | 6 | 0.259406 |
| rs265539       | B3GNT3  | 19 | 17784160 | 3 | 1.275467 |

|                |          |    |          |   |          |
|----------------|----------|----|----------|---|----------|
| rs1003887      | INSL3    | 19 | 17788400 | 8 | 0.159274 |
| rs1003887      | INSL3    | 19 | 17788400 | 5 | 1.158878 |
| rs1003887      | INSL3    | 19 | 17788400 | 4 | 2.667495 |
| rs1003887      | INSL3    | 19 | 17788400 | 2 | 2.965639 |
| rs1003887      | INSL3    | 19 | 17788400 | 6 | 4.608176 |
| rs17750642     | INSL3    | 19 | 17788562 | 3 | 0.488405 |
| rs17750642     | INSL3    | 19 | 17788562 | 1 | 6.080026 |
| rs3008         | JAK3     | 19 | 17798429 | 8 | 0.435567 |
| rs3008         | JAK3     | 19 | 17798429 | 5 | 2.35874  |
| rs7259041      | ARRDC2   | 19 | 17984738 | 6 | 0.971827 |
| rs7259041      | ARRDC2   | 19 | 17984738 | 5 | 0.346342 |
| rs401502       | IL12RB1  | 19 | 18041413 | 1 | 1.370908 |
| SNP19-18041451 | IL12RB1  | 19 | 18041451 | 1 | 1.394601 |
| rs17852635     | IL12RB1  | 19 | 18047575 | 1 | 0.143593 |
| rs740691       | MAST3    | 19 | 18095441 | 6 | 4.725369 |
| rs740691       | MAST3    | 19 | 18095441 | 1 | 0.472669 |
| rs740691       | MAST3    | 19 | 18095441 | 3 | 3.386631 |
| rs740691       | MAST3    | 19 | 18095441 | 8 | 1.194415 |
| rs17683509     | FKSG24   | 19 | 18167990 | 5 | 0.358241 |
| rs1044821      | FKSG24   | 19 | 18168108 | 6 | 7.989897 |
| rs7259012      | PDE4C    | 19 | 18182273 | 5 | 3.809206 |
| rs2229228      | PDE4C    | 19 | 18190784 | 5 | 1.320607 |
| rs999813       | KIAA1683 | 19 | 18229810 | 5 | 0.555182 |
| rs999813       | KIAA1683 | 19 | 18229810 | 3 | 0.528342 |
| rs8103177      | KIAA1683 | 19 | 18236815 | 5 | 0.756171 |
| rs8103177      | KIAA1683 | 19 | 18236815 | 3 | 0.406449 |
| rs2277921      | KIAA1683 | 19 | 18236846 | 3 | 0.381457 |
| rs2277921      | KIAA1683 | 19 | 18236846 | 5 | 0.19913  |
| rs8110972      | KIAA1683 | 19 | 18237407 | 4 | 0.666441 |
| rs8110972      | KIAA1683 | 19 | 18237407 | 3 | 0.846915 |
| rs8110972      | KIAA1683 | 19 | 18237407 | 5 | 0.233657 |
| rs2277922      | KIAA1683 | 19 | 18237522 | 5 | 1.41232  |
| rs2277922      | KIAA1683 | 19 | 18237522 | 4 | 0.13773  |
| rs2277922      | KIAA1683 | 19 | 18237522 | 3 | 0.661766 |
| rs3746186      | KIAA1683 | 19 | 18238274 | 5 | 1.80616  |
| rs3746186      | KIAA1683 | 19 | 18238274 | 4 | 3.948705 |
| rs3746186      | KIAA1683 | 19 | 18238274 | 3 | 2.052685 |
| rs8104533      | KIAA1683 | 19 | 18238496 | 3 | 1.210651 |
| rs8104533      | KIAA1683 | 19 | 18238496 | 5 | 1.849783 |
| rs8104533      | KIAA1683 | 19 | 18238496 | 4 | 0.277411 |
| rs1469023      | KIAA1683 | 19 | 18239219 | 5 | 4.122853 |
| rs1469023      | KIAA1683 | 19 | 18239219 | 3 | 0.806901 |
| rs1469023      | KIAA1683 | 19 | 18239219 | 4 | 1.094711 |
| rs1079166      | KIAA1683 | 19 | 18246214 | 4 | 0.788423 |
| rs1079166      | KIAA1683 | 19 | 18246214 | 1 | 0.025306 |
| rs3746184      | PGPEP1   | 19 | 18335587 | 7 | 0.504384 |
| rs3746184      | PGPEP1   | 19 | 18335587 | 5 | 0.003564 |

|                |          |    |          |   |          |
|----------------|----------|----|----------|---|----------|
| rs1043063      | PGPEP1   | 19 | 18341171 | 5 | 0.64549  |
| rs1043063      | PGPEP1   | 19 | 18341171 | 3 | 0.174306 |
| rs1043063      | PGPEP1   | 19 | 18341171 | 2 | 3.137797 |
| rs1043063      | PGPEP1   | 19 | 18341171 | 7 | 4.386063 |
| rs7226         | PGPEP1   | 19 | 18341609 | 8 | 0.213405 |
| rs7226         | PGPEP1   | 19 | 18341609 | 4 | 2.384524 |
| rs7226         | PGPEP1   | 19 | 18341609 | 3 | 0.063032 |
| rs1059519      | GDF15    | 19 | 18358024 | 1 | 0.393219 |
| rs1059519      | GDF15    | 19 | 18358024 | 4 | 0.099701 |
| rs1059519      | GDF15    | 19 | 18358024 | 5 | 9.602384 |
| rs1059519      | GDF15    | 19 | 18358024 | 2 | 5.558943 |
| rs1059519      | GDF15    | 19 | 18358024 | 7 | 0.588352 |
| rs1059369      | GDF15    | 19 | 18358141 | 4 | 3.126217 |
| rs1059369      | GDF15    | 19 | 18358141 | 3 | 0.285305 |
| rs1059369      | GDF15    | 19 | 18358141 | 8 | 0.62076  |
| rs6512262      | LRRC25   | 19 | 18363565 | 5 | 0.489404 |
| rs1859948      | C19orf50 | 19 | 18540866 | 8 | 9.748118 |
| rs2238647      | CRLF1    | 19 | 18571535 | 8 | 0.258696 |
| rs709679       | TMEM59L  | 19 | 18587856 | 5 | 0.577889 |
| rs1043192      | TMEM59L  | 19 | 18592658 | 8 | 0.359819 |
| rs1076235      | KLHL26   | 19 | 18636077 | 2 | 0.046986 |
| rs1076235      | KLHL26   | 19 | 18636077 | 8 | 0.275328 |
| rs1076235      | KLHL26   | 19 | 18636077 | 1 | 0.61616  |
| rs10410987     | UPF1     | 19 | 18838937 | 7 | 0.089685 |
| rs10410987     | UPF1     | 19 | 18838937 | 1 | 6.504153 |
| rs10416469     | UPF1     | 19 | 18839250 | 5 | 8.264357 |
| rs2074797      | COPE     | 19 | 18872244 | 6 | 0.442402 |
| rs2074797      | COPE     | 19 | 18872244 | 4 | 0.961518 |
| rs2074797      | COPE     | 19 | 18872244 | 1 | 1.453721 |
| rs2231992      | DDX49    | 19 | 18891571 | 5 | 0.207875 |
| rs4808897      | SFRS14   | 19 | 18966259 | 5 | 0.852046 |
| rs4808897      | SFRS14   | 19 | 18966259 | 4 | 7.371745 |
| rs4808921      | SLC25A42 | 19 | 19082846 | 5 | 0.085251 |
| rs4808921      | SLC25A42 | 19 | 19082846 | 4 | 0.215788 |
| rs11729        | TMEM161A | 19 | 19091482 | 1 | 4.576252 |
| rs11729        | TMEM161A | 19 | 19091482 | 3 | 0.685701 |
| rs1064395      | NCAN     | 19 | 19222735 | 3 | 0.499156 |
| SNP19-19240549 | TM6SF2   | 19 | 19240549 | 6 | 2.039983 |
| SNP19-19240549 | TM6SF2   | 19 | 19240549 | 1 | 1.255429 |
| rs11555053     | SF4      | 19 | 19251185 | 3 | 0.736681 |
| rs2033481      | GATAD2A  | 19 | 19478134 | 4 | 0.475489 |
| rs2033481      | GATAD2A  | 19 | 19478134 | 1 | 3.2809   |
| rs7250893      | TSSK6    | 19 | 19486547 | 6 | 4.479512 |
| rs7250893      | TSSK6    | 19 | 19486547 | 4 | 5.239385 |
| rs7250893      | TSSK6    | 19 | 19486547 | 3 | 0.5477   |
| rs17684164     | NDUFA13  | 19 | 19487769 | 3 | 2.540434 |
| rs880090       | GMIP     | 19 | 19601729 | 7 | 0.545824 |



|                |          |    |          |   |          |
|----------------|----------|----|----------|---|----------|
| rs880090       | GMIP     | 19 | 19601729 | 1 | 6.266871 |
| rs880090       | GMIP     | 19 | 19601729 | 4 | 0.648949 |
| rs880090       | GMIP     | 19 | 19601729 | 3 | 0.106078 |
| rs35075083     | GMIP     | 19 | 19608520 | 7 | 0.991672 |
| rs12976582     | ZNF101   | 19 | 19640706 | 4 | 1.151161 |
| rs12976582     | ZNF101   | 19 | 19640706 | 1 | 5.053067 |
| rs7246866      | ZNF14    | 19 | 19683049 | 2 | 1.973148 |
| rs16996360     | ZNF506   | 19 | 19763916 | 6 | 0.824066 |
| rs16996360     | ZNF506   | 19 | 19763916 | 1 | 0.412942 |
| rs16996360     | ZNF506   | 19 | 19763916 | 2 | 0.868109 |
| SNP19-19994846 | ZNF682   | 19 | 19994846 | 2 | 5.387204 |
| SNP19-19994846 | ZNF682   | 19 | 19994846 | 7 | 1.324869 |
| rs7247683      | FLJ44894 | 19 | 20367988 | 2 | 4.117495 |
| rs7247683      | FLJ44894 | 19 | 20367988 | 4 | 0.942683 |
| rs2701302      | FLJ44894 | 19 | 20368239 | 1 | 0.410305 |
| rs2701302      | FLJ44894 | 19 | 20368239 | 5 | 1.411668 |
| SNP19-20923411 | ZNF85    | 19 | 20923411 | 3 | 0.20001  |
| SNP19-20923411 | ZNF85    | 19 | 20923411 | 1 | 1.501141 |
| SNP19-20923504 | ZNF85    | 19 | 20923504 | 3 | 0.52029  |
| rs488125       | ZNF708   | 19 | 21266013 | 7 | 0.41215  |
| rs488125       | ZNF708   | 19 | 21266013 | 8 | 0.245091 |
| rs489845       | ZNF708   | 19 | 21266154 | 3 | 0.757152 |
| rs8112775      | ZNF708   | 19 | 21266229 | 3 | 0.142792 |
| rs504280       | ZNF708   | 19 | 21269219 | 8 | 3.900647 |
| rs504280       | ZNF708   | 19 | 21269219 | 7 | 0.945017 |
| rs7252798      | ZNF100   | 19 | 21699893 | 8 | 1.74321  |
| rs7252798      | ZNF100   | 19 | 21699893 | 3 | 0.176401 |
| rs4932954      | ZNF257   | 19 | 22064294 | 6 | 1.925873 |
| rs4932954      | ZNF257   | 19 | 22064294 | 5 | 0.859049 |
| rs4932954      | ZNF257   | 19 | 22064294 | 1 | 3.381687 |
| rs10417916     | ZNF257   | 19 | 22064455 | 5 | 0.857843 |
| rs10424582     | C19orf12 | 19 | 34885561 | 6 | 1.951516 |
| rs10424582     | C19orf12 | 19 | 34885561 | 4 | 0.360284 |
| rs10424582     | C19orf12 | 19 | 34885561 | 8 | 4.570165 |
| rs10424582     | C19orf12 | 19 | 34885561 | 5 | 0.009834 |
| rs741445       | ZNF507   | 19 | 37528432 | 7 | 0.457326 |
| rs741445       | ZNF507   | 19 | 37528432 | 5 | 1.358764 |
| rs741445       | ZNF507   | 19 | 37528432 | 4 | 0.055986 |
| rs10500258     | ZNF507   | 19 | 37567247 | 5 | 6.006674 |
| rs7253039      | DPY19L3  | 19 | 37664917 | 4 | 7.255308 |
| rs7247420      | ANKRD27  | 19 | 37788626 | 2 | 4.036281 |
| rs7248273      | ANKRD27  | 19 | 37788656 | 2 | 5.370264 |
| rs2302970      | ANKRD27  | 19 | 37790472 | 2 | 1.563641 |
| rs2302970      | ANKRD27  | 19 | 37790472 | 6 | 0.638756 |
| rs2302970      | ANKRD27  | 19 | 37790472 | 5 | 5.093007 |
| rs2302970      | ANKRD27  | 19 | 37790472 | 1 | 0.114173 |
| rs11881633     | TDRD12   | 19 | 37973764 | 3 | 0.943036 |

|                |           |    |          |   |          |
|----------------|-----------|----|----------|---|----------|
| rs11881633     | TDRD12    | 19 | 37973764 | 6 | 0.149264 |
| rs12151363     | TDRD12    | 19 | 38000870 | 2 | 4.820699 |
| rs12151363     | TDRD12    | 19 | 38000870 | 6 | 0.962512 |
| rs12151363     | TDRD12    | 19 | 38000870 | 1 | 0.936974 |
| rs2287884      | SLC7A9    | 19 | 38013287 | 4 | 0.124184 |
| rs2287884      | SLC7A9    | 19 | 38013287 | 1 | 4.669243 |
| rs1007161      | SLC7A9    | 19 | 38044881 | 4 | 0.393205 |
| rs1007161      | SLC7A9    | 19 | 38044881 | 2 | 0.089741 |
| rs1007160      | SLC7A9    | 19 | 38044901 | 2 | 1.371738 |
| rs12150889     | SLC7A9    | 19 | 38046895 | 2 | 4.564111 |
| rs12150889     | SLC7A9    | 19 | 38046895 | 4 | 4.741427 |
| rs12150890     | SLC7A9    | 19 | 38046909 | 6 | 1.665591 |
| rs12150890     | SLC7A9    | 19 | 38046909 | 1 | 1.765908 |
| rs745960       | CCDC123   | 19 | 38061924 | 6 | 0.19927  |
| rs745960       | CCDC123   | 19 | 38061924 | 5 | 0.308284 |
| rs745960       | CCDC123   | 19 | 38061924 | 1 | 0.288064 |
| rs11556219     | C19orf40  | 19 | 38155068 | 6 | 0.651366 |
| rs11556219     | C19orf40  | 19 | 38155068 | 4 | 0.006177 |
| rs11556219     | C19orf40  | 19 | 38155068 | 1 | 4.640946 |
| rs34723366     | C19orf40  | 19 | 38155087 | 4 | 0.324945 |
| rs34723366     | C19orf40  | 19 | 38155087 | 1 | 2.542781 |
| rs2304102      | C19orf40  | 19 | 38159197 | 4 | 0.843837 |
| rs2304102      | C19orf40  | 19 | 38159197 | 5 | 0.661067 |
| rs10410414     | RHPN2     | 19 | 38190911 | 7 | 0.029981 |
| rs10410414     | RHPN2     | 19 | 38190911 | 1 | 5.105452 |
| rs10410414     | RHPN2     | 19 | 38190911 | 4 | 1.500227 |
| rs2287681      | GPATCH1   | 19 | 38300573 | 3 | 0.09088  |
| rs6510356      | GPATCH1   | 19 | 38309423 | 3 | 1.213392 |
| rs6510356      | GPATCH1   | 19 | 38309423 | 2 | 5.484316 |
| rs6510356      | GPATCH1   | 19 | 38309423 | 1 | 0.0118   |
| rs3848596      | WDR88     | 19 | 38327601 | 3 | 0.408475 |
| SNP19-38570677 | PEPD      | 19 | 38570677 | 7 | 0.028869 |
| SNP19-38570677 | PEPD      | 19 | 38570677 | 6 | 5.753987 |
| rs2056180      | KCTD15    | 19 | 38994889 | 5 | 0.298622 |
| rs10418860     | LOC643613 | 19 | 39205753 | 3 | 0.35457  |
| rs10418860     | LOC643613 | 19 | 39205753 | 1 | 0.981597 |
| rs16968855     | LOC126235 | 19 | 39275498 | 1 | 0.691771 |
| rs574004       | LOC126235 | 19 | 39275977 | 5 | 2.595895 |
| rs574004       | LOC126235 | 19 | 39275977 | 8 | 3.837053 |
| rs574004       | LOC126235 | 19 | 39275977 | 3 | 3.228853 |
| SNP19-39398371 | LSM14A    | 19 | 39398371 | 4 | 4.183521 |
| rs392340       | KIAA0355  | 19 | 39534328 | 3 | 0.11038  |
| rs392340       | KIAA0355  | 19 | 39534328 | 6 | 0.721995 |
| rs392340       | KIAA0355  | 19 | 39534328 | 5 | 0.290651 |
| rs1801015      | GPI       | 19 | 39560482 | 8 | 2.523178 |
| rs1801015      | GPI       | 19 | 39560482 | 4 | 0.040606 |
| rs4806060      | LOC401913 | 19 | 40049178 | 3 | 0.45121  |

|                |           |    |          |   |          |
|----------------|-----------|----|----------|---|----------|
| SNP19-40126288 | ZNF30     | 19 | 40126288 | 6 | 3.465548 |
| rs2651109      | ZNF30     | 19 | 40126352 | 1 | 0.463049 |
| rs2651109      | ZNF30     | 19 | 40126352 | 8 | 0.135727 |
| rs2651109      | ZNF30     | 19 | 40126352 | 4 | 6.72816  |
| rs2651109      | ZNF30     | 19 | 40126352 | 7 | 0.791159 |
| rs2651109      | ZNF30     | 19 | 40126352 | 2 | 3.597856 |
| rs3761066      | ZNF30     | 19 | 40127429 | 5 | 0.202567 |
| rs3761066      | ZNF30     | 19 | 40127429 | 6 | 0.464554 |
| rs3761066      | ZNF30     | 19 | 40127429 | 7 | 4.316212 |
| rs3761066      | ZNF30     | 19 | 40127429 | 1 | 3.227885 |
| rs1053216      | ZNF30     | 19 | 40127807 | 1 | 5.397637 |
| rs1053216      | ZNF30     | 19 | 40127807 | 7 | 1.153907 |
| rs1053216      | ZNF30     | 19 | 40127807 | 5 | 0.187506 |
| rs1053216      | ZNF30     | 19 | 40127807 | 6 | 0.0376   |
| rs2290647      | GRAMD1A   | 19 | 40198569 | 3 | 1.73693  |
| rs2290647      | GRAMD1A   | 19 | 40198569 | 2 | 3.996946 |
| SNP19-40202144 | GRAMD1A   | 19 | 40202144 | 5 | 0.730251 |
| rs45512696     | HPN       | 19 | 40242718 | 5 | 0.329749 |
| rs1042328      | HPN       | 19 | 40249100 | 1 | 4.532828 |
| rs1042328      | HPN       | 19 | 40249100 | 7 | 1.382894 |
| rs1042328      | HPN       | 19 | 40249100 | 5 | 0.027074 |
| rs1688029      | HPN       | 19 | 40249280 | 1 | 3.471117 |
| rs1688029      | HPN       | 19 | 40249280 | 5 | 0.54511  |
| rs1688029      | HPN       | 19 | 40249280 | 7 | 0.663718 |
| rs7253620      | LOC728630 | 19 | 40257392 | 5 | 1.407634 |
| rs4835         | FXVD3     | 19 | 40306374 | 3 | 0.282766 |
| rs4835         | FXVD3     | 19 | 40306374 | 8 | 7.895872 |
| rs4835         | FXVD3     | 19 | 40306374 | 5 | 0.20354  |
| rs4835         | FXVD3     | 19 | 40306374 | 6 | 1.622982 |
| rs4835         | FXVD3     | 19 | 40306374 | 7 | 0.498126 |
| rs4835         | FXVD3     | 19 | 40306374 | 1 | 0.430946 |
| rs4835         | FXVD3     | 19 | 40306374 | 4 | 1.19095  |
| rs12852        | FXVD3     | 19 | 40307019 | 4 | 1.713997 |
| rs12852        | FXVD3     | 19 | 40307019 | 6 | 0.376877 |
| rs14358        | LGI4      | 19 | 40307835 | 7 | 0.087113 |
| rs14358        | LGI4      | 19 | 40307835 | 4 | 1.345003 |
| rs14358        | LGI4      | 19 | 40307835 | 6 | 3.633037 |
| rs14358        | LGI4      | 19 | 40307835 | 1 | 5.313674 |
| rs14358        | LGI4      | 19 | 40307835 | 5 | 3.737024 |
| rs14358        | LGI4      | 19 | 40307835 | 8 | 0.040066 |
| rs14358        | LGI4      | 19 | 40307835 | 3 | 0.035588 |
| rs1319969      | LGI4      | 19 | 40309110 | 7 | 0.834834 |
| rs3458         | FXVD5     | 19 | 40352510 | 6 | 1.534895 |
| rs3458         | FXVD5     | 19 | 40352510 | 4 | 7.527251 |
| rs564117       | TMEM162   | 19 | 40410778 | 2 | 1.556083 |
| SNP19-40410860 | TMEM162   | 19 | 40410860 | 4 | 7.035326 |
| SNP19-40410860 | TMEM162   | 19 | 40410860 | 1 | 1.512898 |

|                |           |    |          |   |          |
|----------------|-----------|----|----------|---|----------|
| SNP19-40410860 | TMEM162   | 19 | 40410860 | 5 | 1.679107 |
| SNP19-40410860 | TMEM162   | 19 | 40410860 | 3 | 1.130976 |
| rs565791       | TMEM162   | 19 | 40410946 | 6 | 0.42146  |
| SNP19-40411417 | TMEM162   | 19 | 40411417 | 1 | 0.430114 |
| rs10416254     | LOC643951 | 19 | 40415474 | 5 | 0.984542 |
| rs10416254     | LOC643951 | 19 | 40415474 | 1 | 0.871516 |
| rs10416254     | LOC643951 | 19 | 40415474 | 2 | 1.198162 |
| rs10416254     | LOC643951 | 19 | 40415474 | 3 | 1.363978 |
| rs10416254     | LOC643951 | 19 | 40415474 | 4 | 5.013596 |
| rs10418562     | LOC643951 | 19 | 40415512 | 8 | 0.533547 |
| rs10418562     | LOC643951 | 19 | 40415512 | 1 | 0.247908 |
| rs10418562     | LOC643951 | 19 | 40415512 | 3 | 0.156077 |
| rs10418562     | LOC643951 | 19 | 40415512 | 5 | 0.493591 |
| rs10418562     | LOC643951 | 19 | 40415512 | 4 | 2.516823 |
| rs10418562     | LOC643951 | 19 | 40415512 | 6 | 1.719273 |
| rs2073900      | LSR       | 19 | 40433296 | 3 | 0.845303 |
| rs2073900      | LSR       | 19 | 40433296 | 6 | 0.801737 |
| GA016224       | USF2      | 19 | 40462132 | 2 | 1.690435 |
| rs10406069     | CD22      | 19 | 40528370 | 8 | 4.558386 |
| rs3088063      | CD22      | 19 | 40529916 | 6 | 0.213065 |
| rs2301151      | FFAR1     | 19 | 40534926 | 3 | 0.547564 |
| rs7976         | KRTDAP    | 19 | 40670139 | 7 | 0.36547  |
| rs7976         | KRTDAP    | 19 | 40670139 | 5 | 0.248414 |
| rs7976         | KRTDAP    | 19 | 40670139 | 8 | 0.0045   |
| rs4806162      | DMKN      | 19 | 40694550 | 6 | 2.728412 |
| rs4806163      | DMKN      | 19 | 40695946 | 1 | 4.901214 |
| rs4806163      | DMKN      | 19 | 40695946 | 4 | 1.505216 |
| rs12460932     | DMKN      | 19 | 40696011 | 6 | 1.538956 |
| rs17705633     | SBSN      | 19 | 40707492 | 3 | 0.024734 |
| SNP19-40709438 | SBSN      | 19 | 40709438 | 1 | 4.963317 |
| SNP19-40721080 | GAPDHS    | 19 | 40721080 | 3 | 1.356598 |
| rs2239945      | GAPDHS    | 19 | 40725300 | 2 | 6.6011   |
| SNP19-40805430 | KIAA0841  | 19 | 40805430 | 4 | 0.340914 |
| rs17705854     | KIAA0841  | 19 | 40805918 | 1 | 4.756512 |
| rs2285421      | UPK1A     | 19 | 40860754 | 3 | 0.331265 |
| rs2285421      | UPK1A     | 19 | 40860754 | 4 | 0.305895 |
| rs2285421      | UPK1A     | 19 | 40860754 | 8 | 1.510843 |
| rs2285421      | UPK1A     | 19 | 40860754 | 7 | 10.11273 |
| rs2285421      | UPK1A     | 19 | 40860754 | 6 | 5.580158 |
| rs2285421      | UPK1A     | 19 | 40860754 | 5 | 6.045457 |
| rs11882996     | UPK1A     | 19 | 40861125 | 7 | 0.462203 |
| rs2227278      | ZBTB32    | 19 | 40897890 | 7 | 0.608457 |
| SNP19-40903582 | MLL4      | 19 | 40903582 | 5 | 0.120257 |
| rs16970649     | MLL4      | 19 | 40914697 | 7 | 0.016536 |
| rs12459634     | TMEM149   | 19 | 40922014 | 3 | 2.030409 |
| rs12459634     | TMEM149   | 19 | 40922014 | 6 | 1.035207 |
| rs12459634     | TMEM149   | 19 | 40922014 | 2 | 4.874865 |

|                |           |    |          |   |          |
|----------------|-----------|----|----------|---|----------|
| rs3746278      | U2AF1L4   | 19 | 40925310 | 4 | 1.114498 |
| SNP19-40950561 | C19orf55  | 19 | 40950561 | 7 | 7.212655 |
| SNP19-40951255 | C19orf55  | 19 | 40951255 | 8 | 5.624267 |
| rs231228       | SNX26     | 19 | 40960611 | 7 | 0.634366 |
| rs2291067      | SNX26     | 19 | 40965374 | 6 | 0.558565 |
| rs2291067      | SNX26     | 19 | 40965374 | 2 | 2.55075  |
| rs2291067      | SNX26     | 19 | 40965374 | 5 | 0.389449 |
| rs2291067      | SNX26     | 19 | 40965374 | 3 | 0.654848 |
| SNP19-40966914 | SNX26     | 19 | 40966914 | 3 | 0.476285 |
| SNP19-40966914 | SNX26     | 19 | 40966914 | 6 | 1.06777  |
| rs12462360     | PRODH2    | 19 | 40994761 | 1 | 1.745748 |
| rs12462360     | PRODH2    | 19 | 40994761 | 2 | 2.798838 |
| SNP19-41014441 | NPHS1     | 19 | 41014441 | 1 | 0.978795 |
| rs10420353     | THAP8     | 19 | 41222172 | 4 | 0.402244 |
| rs10421966     | THAP8     | 19 | 41222183 | 7 | 7.895492 |
| rs10421966     | THAP8     | 19 | 41222183 | 4 | 1.407217 |
| rs10421966     | THAP8     | 19 | 41222183 | 8 | 4.657428 |
| SNP19-41222268 | THAP8     | 19 | 41222268 | 2 | 4.619858 |
| SNP19-41241524 | WDR62     | 19 | 41241524 | 2 | 2.29465  |
| rs2301734      | WDR62     | 19 | 41267485 | 5 | 0.655218 |
| rs2301734      | WDR62     | 19 | 41267485 | 4 | 6.536127 |
| rs2285745      | WDR62     | 19 | 41282169 | 5 | 0.289044 |
| rs2285745      | WDR62     | 19 | 41282169 | 4 | 0.926624 |
| SNP19-41286378 | WDR62     | 19 | 41286378 | 2 | 0.746919 |
| SNP19-41286378 | WDR62     | 19 | 41286378 | 6 | 0.464109 |
| SNP19-41286378 | WDR62     | 19 | 41286378 | 8 | 2.207919 |
| SNP19-41286378 | WDR62     | 19 | 41286378 | 3 | 0.210957 |
| SNP19-41286378 | WDR62     | 19 | 41286378 | 5 | 0.44299  |
| SNP19-41286378 | WDR62     | 19 | 41286378 | 4 | 0.238422 |
| SNP19-41286378 | WDR62     | 19 | 41286378 | 1 | 0.116156 |
| rs2072605      | LOC728361 | 19 | 41295543 | 2 | 2.216469 |
| rs2072605      | LOC728361 | 19 | 41295543 | 4 | 0.408402 |
| rs2231569      | POLR2I    | 19 | 41297715 | 2 | 3.856494 |
| rs753420       | COX7A1    | 19 | 41335535 | 4 | 0.986845 |
| rs753420       | COX7A1    | 19 | 41335535 | 6 | 0.460894 |
| rs753420       | COX7A1    | 19 | 41335535 | 3 | 0.369786 |
| rs17206393     | ZNF566    | 19 | 41630434 | 2 | 2.055729 |
| SNP19-41810279 | ZNF382    | 19 | 41810279 | 5 | 4.101533 |
| SNP19-41810279 | ZNF382    | 19 | 41810279 | 4 | 0.066459 |
| SNP19-41810279 | ZNF382    | 19 | 41810279 | 3 | 0.130861 |
| rs1234514      | ZNF382    | 19 | 41810529 | 4 | 0.166868 |
| rs1234514      | ZNF382    | 19 | 41810529 | 3 | 0.05552  |
| rs1234514      | ZNF382    | 19 | 41810529 | 5 | 0.139517 |
| rs7248477      | ZNF461    | 19 | 41849441 | 3 | 0.369801 |
| rs7248477      | ZNF461    | 19 | 41849441 | 8 | 1.064339 |
| rs1673087      | LOC728485 | 19 | 41956030 | 2 | 2.438055 |
| rs1673087      | LOC728485 | 19 | 41956030 | 5 | 0.283132 |

|            |           |    |          |   |          |
|------------|-----------|----|----------|---|----------|
| rs4806370  | ZNF345    | 19 | 42060727 | 6 | 0.060824 |
| rs555023   | ZNF345    | 19 | 42061294 | 1 | 1.602851 |
| rs547483   | ZNF568    | 19 | 42133205 | 2 | 6.45056  |
| rs547483   | ZNF568    | 19 | 42133205 | 3 | 0.669126 |
| rs547483   | ZNF568    | 19 | 42133205 | 4 | 0.452471 |
| rs547483   | ZNF568    | 19 | 42133205 | 7 | 0.863021 |
| rs546589   | ZNF568    | 19 | 42133302 | 5 | 0.18199  |
| rs546589   | ZNF568    | 19 | 42133302 | 3 | 0.362341 |
| rs546589   | ZNF568    | 19 | 42133302 | 7 | 0.54869  |
| rs1644634  | ZNF568    | 19 | 42133820 | 5 | 1.239441 |
| rs1644634  | ZNF568    | 19 | 42133820 | 3 | 0.55047  |
| rs1402468  | ZNF420    | 19 | 42312088 | 5 | 0.280356 |
| rs1402468  | ZNF420    | 19 | 42312088 | 7 | 0.760918 |
| rs1402468  | ZNF420    | 19 | 42312088 | 8 | 0.187704 |
| rs1402468  | ZNF420    | 19 | 42312088 | 2 | 3.065661 |
| rs1402468  | ZNF420    | 19 | 42312088 | 3 | 0.160944 |
| rs2305115  | HKR1      | 19 | 42527498 | 6 | 5.247578 |
| rs2921563  | HKR1      | 19 | 42545880 | 6 | 4.649374 |
| rs12977460 | ZNF793    | 19 | 42716111 | 1 | 1.524346 |
| rs12977460 | ZNF793    | 19 | 42716111 | 2 | 1.88781  |
| rs4803216  | ZNF793    | 19 | 42725514 | 2 | 1.018685 |
| rs4803216  | ZNF793    | 19 | 42725514 | 5 | 2.121677 |
| rs4803216  | ZNF793    | 19 | 42725514 | 6 | 0.418144 |
| rs4803216  | ZNF793    | 19 | 42725514 | 1 | 0.279557 |
| rs2291002  | ZNF793    | 19 | 42725766 | 4 | 1.240995 |
| rs2291002  | ZNF793    | 19 | 42725766 | 5 | 0.498382 |
| rs2291002  | ZNF793    | 19 | 42725766 | 8 | 0.291521 |
| rs7254170  | ZFP30     | 19 | 42815633 | 1 | 0.251192 |
| rs7254170  | ZFP30     | 19 | 42815633 | 5 | 0.861718 |
| rs7259272  | ZNF781    | 19 | 42874955 | 7 | 0.455813 |
| rs7259272  | ZNF781    | 19 | 42874955 | 2 | 2.462664 |
| rs7259272  | ZNF781    | 19 | 42874955 | 4 | 0.917524 |
| rs958305   | ZNF607    | 19 | 42881280 | 5 | 5.651968 |
| rs958305   | ZNF607    | 19 | 42881280 | 4 | 6.027908 |
| rs958305   | ZNF607    | 19 | 42881280 | 8 | 3.486473 |
| rs12461753 | ZNF607    | 19 | 42894355 | 7 | 0.468253 |
| rs17306508 | ZNF607    | 19 | 42902291 | 5 | 0.477145 |
| rs17306508 | ZNF607    | 19 | 42902291 | 1 | 1.181084 |
| rs2075283  | LOC728533 | 19 | 42975630 | 6 | 2.491158 |
| rs2075283  | LOC728533 | 19 | 42975630 | 7 | 4.841095 |
| rs2075283  | LOC728533 | 19 | 42975630 | 2 | 1.893938 |
| rs2075283  | LOC728533 | 19 | 42975630 | 3 | 4.679263 |
| rs241942   | LOC644554 | 19 | 42999744 | 2 | 1.674057 |
| rs16975930 | LOC728853 | 19 | 43012654 | 6 | 0.89894  |
| rs10402530 | LOC728853 | 19 | 43013478 | 8 | 0.340683 |
| rs10402530 | LOC728853 | 19 | 43013478 | 5 | 0.765828 |
| rs10422056 | WDR87     | 19 | 43070379 | 3 | 0.183289 |

|                |          |    |          |   |          |
|----------------|----------|----|----------|---|----------|
| rs10422056     | WDR87    | 19 | 43070379 | 1 | 0.310551 |
| rs10422056     | WDR87    | 19 | 43070379 | 5 | 0.05375  |
| rs6508750      | WDR87    | 19 | 43071286 | 1 | 2.200406 |
| rs6508750      | WDR87    | 19 | 43071286 | 7 | 0.150499 |
| SNP19-43264734 | SIPA1L3  | 19 | 43264734 | 2 | 4.113608 |
| rs3195803      | SIPA1L3  | 19 | 43390837 | 7 | 0.00213  |
| rs3195803      | SIPA1L3  | 19 | 43390837 | 1 | 0.602758 |
| rs34837947     | DPF1     | 19 | 43398726 | 4 | 0.740996 |
| rs11556992     | YIF1B    | 19 | 43492016 | 4 | 7.216425 |
| rs2286475      | C19orf15 | 19 | 43539271 | 7 | 0.259453 |
| rs2286475      | C19orf15 | 19 | 43539271 | 6 | 2.167691 |
| rs2286475      | C19orf15 | 19 | 43539271 | 4 | 1.172937 |
| rs2286475      | C19orf15 | 19 | 43539271 | 5 | 0.194245 |
| rs2286475      | C19orf15 | 19 | 43539271 | 3 | 0.533738 |
| rs1052375      | C19orf15 | 19 | 43553173 | 4 | 0.546666 |
| rs1052375      | C19orf15 | 19 | 43553173 | 7 | 1.735425 |
| rs1052375      | C19orf15 | 19 | 43553173 | 2 | 2.616674 |
| rs1052375      | C19orf15 | 19 | 43553173 | 8 | 1.982985 |
| rs3745961      | FAM98C   | 19 | 43585942 | 6 | 8.034997 |
| rs3745964      | FAM98C   | 19 | 43591388 | 6 | 0.838737 |
| rs4802399      | RASGRP4  | 19 | 43591839 | 3 | 0.235292 |
| SNP19-43602627 | RASGRP4  | 19 | 43602627 | 3 | 0.800466 |
| rs2288888      | RYR1     | 19 | 43638022 | 3 | 1.158505 |
| rs2228069      | RYR1     | 19 | 43648643 | 3 | 2.899573 |
| rs2228069      | RYR1     | 19 | 43648643 | 5 | 2.865325 |
| rs2228069      | RYR1     | 19 | 43648643 | 7 | 3.360518 |
| rs2228070      | RYR1     | 19 | 43648679 | 5 | 2.142935 |
| rs2228070      | RYR1     | 19 | 43648679 | 7 | 0.729145 |
| rs2228070      | RYR1     | 19 | 43648679 | 8 | 1.53256  |
| rs1469698      | RYR1     | 19 | 43685396 | 1 | 3.580428 |
| rs11553600     | ACTN4    | 19 | 43888576 | 4 | 5.639642 |
| rs11553600     | ACTN4    | 19 | 43888576 | 1 | 5.544479 |
| SNP19-43920084 | CAPN12   | 19 | 43920084 | 1 | 2.808236 |
| SNP19-43920084 | CAPN12   | 19 | 43920084 | 4 | 0.365119 |
| rs2229259      | ECH1     | 19 | 43998943 | 4 | 6.684592 |
| rs1001413      | FLJ45909 | 19 | 44058951 | 3 | 0.194757 |
| rs1001413      | FLJ45909 | 19 | 44058951 | 4 | 0.77127  |
| rs730078       | SARS2    | 19 | 44113228 | 8 | 0.586494 |
| rs730078       | SARS2    | 19 | 44113228 | 1 | 1.321051 |
| rs730078       | SARS2    | 19 | 44113228 | 5 | 0.024672 |
| rs730078       | SARS2    | 19 | 44113228 | 3 | 0.39863  |
| rs2304118      | FBXO17   | 19 | 44132806 | 5 | 0.366674 |
| rs2304118      | FBXO17   | 19 | 44132806 | 3 | 0.937528 |
| rs533573       | FBXO27   | 19 | 44207779 | 5 | 3.913998 |
| rs774727       | FLJ16165 | 19 | 44266877 | 6 | 0.140999 |
| rs8111996      | FLJ16165 | 19 | 44267590 | 3 | 0.506069 |
| rs8111996      | FLJ16165 | 19 | 44267590 | 5 | 0.440394 |

|            |           |    |          |   |          |
|------------|-----------|----|----------|---|----------|
| rs45598837 | PAK4      | 19 | 44351312 | 8 | 1.191846 |
| rs45598837 | PAK4      | 19 | 44351312 | 3 | 1.166729 |
| rs31728    | PLEKHG2   | 19 | 44607598 | 4 | 7.007113 |
| rs31728    | PLEKHG2   | 19 | 44607598 | 2 | 4.209217 |
| rs31728    | PLEKHG2   | 19 | 44607598 | 7 | 0.482413 |
| rs31728    | PLEKHG2   | 19 | 44607598 | 5 | 7.391426 |
| rs17628    | RPS16     | 19 | 44618349 | 4 | 0.098357 |
| rs17628    | RPS16     | 19 | 44618349 | 2 | 2.419917 |
| rs17628    | RPS16     | 19 | 44618349 | 5 | 0.614113 |
| rs17795475 | EID2B     | 19 | 44713599 | 6 | 3.056077 |
| rs17795475 | EID2B     | 19 | 44713599 | 4 | 5.156435 |
| rs7258833  | LOC400696 | 19 | 44866076 | 3 | 1.017276 |
| rs7258833  | LOC400696 | 19 | 44866076 | 5 | 0.141288 |
| rs4803286  | LOC400696 | 19 | 44868676 | 1 | 0.595982 |
| rs10755    | LGALS14   | 19 | 44891754 | 1 | 0.360333 |
| rs10755    | LGALS14   | 19 | 44891754 | 3 | 0.911305 |
| rs10755    | LGALS14   | 19 | 44891754 | 5 | 1.607296 |
| rs17608    | CLC       | 19 | 44917486 | 7 | 0.214467 |
| rs3746013  | FCGBP     | 19 | 45055766 | 5 | 0.894646 |
| rs3746013  | FCGBP     | 19 | 45055766 | 7 | 0.292287 |
| rs885723   | FCGBP     | 19 | 45091270 | 5 | 0.948729 |
| rs2111543  | ZNF546    | 19 | 45211745 | 1 | 5.452083 |
| rs2111543  | ZNF546    | 19 | 45211745 | 4 | 0.010221 |
| rs2111544  | ZNF546    | 19 | 45211775 | 4 | 4.701668 |
| rs2111544  | ZNF546    | 19 | 45211775 | 1 | 5.158801 |
| rs2304184  | CNTD2     | 19 | 45420257 | 8 | 4.891454 |
| rs2304184  | CNTD2     | 19 | 45420257 | 1 | 0.123134 |
| rs268674   | PRX       | 19 | 45592705 | 4 | 0.868683 |
| rs3745202  | PRX       | 19 | 45592851 | 7 | 7.22174  |
| rs268673   | PRX       | 19 | 45593336 | 7 | 0.597799 |
| rs268673   | PRX       | 19 | 45593336 | 5 | 0.022519 |
| rs268672   | PRX       | 19 | 45593444 | 5 | 0.495641 |
| rs268672   | PRX       | 19 | 45593444 | 7 | 0.062204 |
| rs268671   | PRX       | 19 | 45593454 | 5 | 0.864875 |
| rs7258094  | SPTBN4    | 19 | 45704030 | 1 | 1.684858 |
| rs7258094  | SPTBN4    | 19 | 45704030 | 5 | 0.436706 |
| rs814501   | SPTBN4    | 19 | 45730414 | 6 | 1.631281 |
| rs814501   | SPTBN4    | 19 | 45730414 | 3 | 0.289723 |
| rs1131620  | LTBP4     | 19 | 45809709 | 8 | 0.200583 |
| rs1131620  | LTBP4     | 19 | 45809709 | 2 | 3.218883 |
| rs1131620  | LTBP4     | 19 | 45809709 | 5 | 0.196388 |
| rs11668767 | LTBP4     | 19 | 45820149 | 8 | 0.76163  |
| rs11668767 | LTBP4     | 19 | 45820149 | 5 | 1.342061 |
| rs7367     | LTBP4     | 19 | 45821682 | 2 | 4.102803 |
| rs7367     | LTBP4     | 19 | 45821682 | 8 | 0.479432 |
| rs7367     | LTBP4     | 19 | 45821682 | 5 | 0.065891 |
| rs12975396 | NUMBL     | 19 | 45865212 | 1 | 5.786368 |



|                |          |    |          |   |          |
|----------------|----------|----|----------|---|----------|
| rs11673492     | ADCK4    | 19 | 45912369 | 5 | 0.994564 |
| rs11673492     | ADCK4    | 19 | 45912369 | 1 | 4.228613 |
| rs10420685     | ITPKC    | 19 | 45926960 | 5 | 0.835508 |
| rs1869710      | C19orf54 | 19 | 45948215 | 5 | 6.070811 |
| rs2604875      | SNRPA    | 19 | 45955243 | 5 | 0.438468 |
| rs2233156      | MIA      | 19 | 45973540 | 5 | 3.414179 |
| rs2545763      | EGLN2    | 19 | 45999010 | 5 | 7.045738 |
| rs3733829      | EGLN2    | 19 | 46002411 | 8 | 0.849237 |
| rs3733829      | EGLN2    | 19 | 46002411 | 1 | 3.258465 |
| rs3733829      | EGLN2    | 19 | 46002411 | 7 | 0.232345 |
| rs3733828      | EGLN2    | 19 | 46002449 | 5 | 0.133207 |
| rs2241720      | CCDC97   | 19 | 46521149 | 1 | 5.319835 |
| rs2241718      | CCDC97   | 19 | 46521446 | 1 | 4.568562 |
| rs1800472      | TGFB1    | 19 | 46539700 | 1 | 3.810993 |
| rs1800471      | TGFB1    | 19 | 46550716 | 4 | 1.211774 |
| rs1800471      | TGFB1    | 19 | 46550716 | 6 | 5.893151 |
| SNP19-46611870 | BCKDHA   | 19 | 46611870 | 3 | 0.196554 |
| rs284661       | B3GNT8   | 19 | 46623960 | 4 | 0.875191 |
| rs284661       | B3GNT8   | 19 | 46623960 | 5 | 1.18657  |
| rs284661       | B3GNT8   | 19 | 46623960 | 3 | 1.233538 |
| rs284662       | B3GNT8   | 19 | 46624115 | 3 | 0.876464 |
| rs284662       | B3GNT8   | 19 | 46624115 | 5 | 1.172453 |
| rs284662       | B3GNT8   | 19 | 46624115 | 4 | 0.136334 |
| rs284662       | B3GNT8   | 19 | 46624115 | 7 | 1.271802 |
| rs284663       | B3GNT8   | 19 | 46624452 | 4 | 0.206455 |
| rs284663       | B3GNT8   | 19 | 46624452 | 7 | 0.82148  |
| rs284663       | B3GNT8   | 19 | 46624452 | 3 | 0.590075 |
| rs284663       | B3GNT8   | 19 | 46624452 | 5 | 0.720653 |
| rs1043413      | ATP5SL   | 19 | 46631137 | 4 | 2.615656 |
| rs1043413      | ATP5SL   | 19 | 46631137 | 7 | 0.160953 |
| rs1043413      | ATP5SL   | 19 | 46631137 | 3 | 0.246866 |
| rs1043413      | ATP5SL   | 19 | 46631137 | 5 | 0.715951 |
| rs714106       | CEACAM21 | 19 | 46775689 | 3 | 0.852237 |
| rs714106       | CEACAM21 | 19 | 46775689 | 5 | 1.957594 |
| rs714106       | CEACAM21 | 19 | 46775689 | 1 | 1.767435 |
| rs1041994      | CEACAM4  | 19 | 46817500 | 1 | 1.501074 |
| rs1041994      | CEACAM4  | 19 | 46817500 | 5 | 0.299303 |
| rs1041994      | CEACAM4  | 19 | 46817500 | 4 | 2.492001 |
| rs8102488      | CEACAM7  | 19 | 46882699 | 3 | 1.124918 |
| rs899662       | CEACAM3  | 19 | 47007121 | 7 | 0.537492 |
| rs2217342      | ATP1A3   | 19 | 47181356 | 1 | 2.030871 |
| rs11557114     | ERF      | 19 | 47445489 | 1 | 5.721392 |
| rs1206038      | MEGF8    | 19 | 47554875 | 1 | 4.91415  |
| GA034671       | MEGF8    | 19 | 47573935 | 1 | 4.959151 |
| rs11673645     | CXCL17   | 19 | 47638953 | 1 | 3.367037 |
| SNP19-47723354 | CEACAM1  | 19 | 47723354 | 7 | 6.762188 |
| SNP19-47723354 | CEACAM1  | 19 | 47723354 | 5 | 0.706284 |

|                |           |    |          |   |          |
|----------------|-----------|----|----------|---|----------|
| SNP19-47723354 | CEACAM1   | 19 | 47723354 | 1 | 1.72095  |
| SNP19-47723354 | CEACAM1   | 19 | 47723354 | 6 | 1.105065 |
| SNP19-47723354 | CEACAM1   | 19 | 47723354 | 2 | 3.83994  |
| SNP19-47723354 | CEACAM1   | 19 | 47723354 | 3 | 1.565545 |
| SNP19-47723354 | CEACAM1   | 19 | 47723354 | 8 | 5.520143 |
| SNP19-47723354 | CEACAM1   | 19 | 47723354 | 4 | 0.98719  |
| rs12459171     | PSG1      | 19 | 48075641 | 3 | 1.350813 |
| rs12459171     | PSG1      | 19 | 48075641 | 4 | 0.73285  |
| rs12459171     | PSG1      | 19 | 48075641 | 1 | 3.734182 |
| rs3746096      | PSG2      | 19 | 48267714 | 5 | 1.732116 |
| GA034678       | CD177     | 19 | 48549906 | 1 | 2.337513 |
| GA034678       | CD177     | 19 | 48549906 | 3 | 0.528625 |
| GA034681       | CD177     | 19 | 48558289 | 3 | 0.209239 |
| GA034681       | CD177     | 19 | 48558289 | 1 | 3.210707 |
| rs7257560      | CD177     | 19 | 48558663 | 3 | 0.131766 |
| rs7257560      | CD177     | 19 | 48558663 | 1 | 0.236674 |
| rs7257560      | CD177     | 19 | 48558663 | 2 | 0.7854   |
| rs7257560      | CD177     | 19 | 48558663 | 5 | 0.473074 |
| rs11673673     | TEX101    | 19 | 48602489 | 1 | 0.025406 |
| SNP19-48612452 | TEX101    | 19 | 48612452 | 3 | 0.053161 |
| rs3816438      | TEX101    | 19 | 48613901 | 1 | 1.492189 |
| rs3816438      | TEX101    | 19 | 48613901 | 4 | 0.123772 |
| rs1133929      | PHLDB3    | 19 | 48675580 | 7 | 0.39959  |
| rs2682547      | NULL      | 19 | 48692897 | 5 | 0.699324 |
| rs2256507      | LOC729244 | 19 | 48730146 | 7 | 0.501358 |
| rs915927       | XRCC1     | 19 | 48749067 | 6 | 0.306323 |
| rs915927       | XRCC1     | 19 | 48749067 | 2 | 2.164216 |
| rs1799782      | XRCC1     | 19 | 48749414 | 6 | 0.850499 |
| rs1799782      | XRCC1     | 19 | 48749414 | 8 | 0.627737 |
| rs3746002      | ZNF428    | 19 | 48815734 | 8 | 0.005118 |
| rs3746002      | ZNF428    | 19 | 48815734 | 2 | 4.241057 |
| rs3746002      | ZNF428    | 19 | 48815734 | 5 | 0.151037 |
| rs3746002      | ZNF428    | 19 | 48815734 | 7 | 0.765465 |
| rs349046       | LYPD5     | 19 | 48992466 | 1 | 3.805511 |
| SNP19-48994464 | LYPD5     | 19 | 48994464 | 5 | 0.614686 |
| rs11547806     | LYPD5     | 19 | 48994906 | 6 | 0.873753 |
| rs11547806     | LYPD5     | 19 | 48994906 | 1 | 4.627814 |
| rs11547806     | LYPD5     | 19 | 48994906 | 5 | 1.091801 |
| rs11547806     | LYPD5     | 19 | 48994906 | 7 | 6.462532 |
| SNP19-49044506 | ZNF283    | 19 | 49044506 | 6 | 6.207747 |
| SNP19-49044506 | ZNF283    | 19 | 49044506 | 4 | 7.545035 |
| SNP19-49044506 | ZNF283    | 19 | 49044506 | 1 | 0.058379 |
| SNP19-49044506 | ZNF283    | 19 | 49044506 | 3 | 0.17601  |
| SNP19-49044506 | ZNF283    | 19 | 49044506 | 2 | 2.786513 |
| rs365745       | ZNF221    | 19 | 49163049 | 1 | 4.449379 |
| SNP19-49163092 | ZNF221    | 19 | 49163092 | 1 | 2.838737 |
| rs11883068     | ZNF230    | 19 | 49208804 | 1 | 6.163752 |

|                |           |    |          |   |          |
|----------------|-----------|----|----------|---|----------|
| rs11883068     | ZNF230    | 19 | 49208804 | 7 | 1.128861 |
| SNP19-49227839 | ZNF222    | 19 | 49227839 | 6 | 6.298726 |
| SNP19-49227839 | ZNF222    | 19 | 49227839 | 7 | 0.107294 |
| SNP19-49227839 | ZNF222    | 19 | 49227839 | 5 | 2.614403 |
| SNP19-49227839 | ZNF222    | 19 | 49227839 | 8 | 0.173784 |
| SNP19-49227839 | ZNF222    | 19 | 49227839 | 1 | 5.810243 |
| SNP19-49302683 | ZNF224    | 19 | 49302683 | 6 | 0.385311 |
| SNP19-49302683 | ZNF224    | 19 | 49302683 | 1 | 3.689111 |
| rs4508518      | ZNF224    | 19 | 49303260 | 8 | 6.930885 |
| rs1105561      | ZNF226    | 19 | 49361800 | 3 | 0.433946 |
| rs1105561      | ZNF226    | 19 | 49361800 | 7 | 5.202989 |
| rs1105561      | ZNF226    | 19 | 49361800 | 8 | 0.226941 |
| rs2884016      | ZNF233    | 19 | 49470639 | 1 | 5.18235  |
| rs4280359      | ZNF228    | 19 | 49525691 | 3 | 0.045108 |
| rs4280359      | ZNF228    | 19 | 49525691 | 7 | 1.202767 |
| rs4280359      | ZNF228    | 19 | 49525691 | 1 | 7.099659 |
| rs4280359      | ZNF228    | 19 | 49525691 | 6 | 1.68354  |
| rs4280359      | ZNF228    | 19 | 49525691 | 8 | 0.698818 |
| rs2734455      | ZNF229    | 19 | 49622375 | 1 | 6.458318 |
| rs2734455      | ZNF229    | 19 | 49622375 | 3 | 0.617841 |
| rs1062093      | ZNF229    | 19 | 49623835 | 6 | 4.709345 |
| rs1062093      | ZNF229    | 19 | 49623835 | 7 | 0.676139 |
| rs1062093      | ZNF229    | 19 | 49623835 | 2 | 7.9389   |
| rs1062093      | ZNF229    | 19 | 49623835 | 4 | 0.537894 |
| rs1897824      | ZNF285B   | 19 | 49668911 | 3 | 3.722328 |
| rs1897824      | ZNF285B   | 19 | 49668911 | 7 | 3.62928  |
| rs2020083      | ZNF180    | 19 | 49673365 | 5 | 1.24749  |
| rs2020083      | ZNF180    | 19 | 49673365 | 3 | 0.941002 |
| rs2253563      | ZNF180    | 19 | 49675407 | 7 | 1.671115 |
| rs2253563      | ZNF180    | 19 | 49675407 | 4 | 0.706938 |
| rs2253563      | ZNF180    | 19 | 49675407 | 5 | 0.071206 |
| rs17714646     | FLJ41856  | 19 | 49734335 | 7 | 1.035916 |
| rs17714646     | FLJ41856  | 19 | 49734335 | 1 | 0.389623 |
| rs7250946      | LOC147710 | 19 | 49831860 | 4 | 0.375549 |
| rs2289494      | CEACAM19  | 19 | 49878805 | 3 | 0.311717 |
| rs2289494      | CEACAM19  | 19 | 49878805 | 2 | 4.696503 |
| rs3729640      | PVRL2     | 19 | 50073757 | 5 | 0.3468   |
| rs3729640      | PVRL2     | 19 | 50073757 | 4 | 1.024771 |
| rs3729640      | PVRL2     | 19 | 50073757 | 2 | 3.319033 |
| rs3729640      | PVRL2     | 19 | 50073757 | 3 | 1.146336 |
| rs157581       | TOMM40    | 19 | 50087554 | 1 | 0.898704 |
| rs157581       | TOMM40    | 19 | 50087554 | 7 | 1.37242  |
| rs157581       | TOMM40    | 19 | 50087554 | 2 | 0.700631 |
| rs157581       | TOMM40    | 19 | 50087554 | 6 | 0.081811 |
| rs157581       | TOMM40    | 19 | 50087554 | 3 | 0.260244 |
| SNP19-50098513 | TOMM40    | 19 | 50098513 | 3 | 0.676361 |
| SNP19-50098513 | TOMM40    | 19 | 50098513 | 1 | 0.970376 |

|                |         |    |          |   |          |
|----------------|---------|----|----------|---|----------|
| SNP19-50098513 | TOMM40  | 19 | 50098513 | 7 | 1.122318 |
| SNP19-50098513 | TOMM40  | 19 | 50098513 | 5 | 0.766839 |
| SNP19-50098513 | TOMM40  | 19 | 50098513 | 2 | 8.536758 |
| rs1064725      | APOC1   | 19 | 50114401 | 7 | 1.969573 |
| rs1064725      | APOC1   | 19 | 50114401 | 6 | 0.394794 |
| rs1132899      | APOC4   | 19 | 50139876 | 6 | 2.062309 |
| rs1132899      | APOC4   | 19 | 50139876 | 1 | 0.721541 |
| rs1132899      | APOC4   | 19 | 50139876 | 3 | 0.735522 |
| rs5167         | APOC4   | 19 | 50140305 | 7 | 0.529979 |
| rs5167         | APOC4   | 19 | 50140305 | 2 | 1.885411 |
| rs5167         | APOC4   | 19 | 50140305 | 1 | 0.338626 |
| rs5167         | APOC4   | 19 | 50140305 | 3 | 0.386716 |
| rs3178166      | GEMIN7  | 19 | 50286010 | 1 | 1.916491 |
| rs3178166      | GEMIN7  | 19 | 50286010 | 5 | 1.122464 |
| rs3178166      | GEMIN7  | 19 | 50286010 | 7 | 1.507671 |
| rs3178166      | GEMIN7  | 19 | 50286010 | 2 | 1.767186 |
| rs17642665     | GEMIN7  | 19 | 50286344 | 6 | 1.530645 |
| rs17642665     | GEMIN7  | 19 | 50286344 | 1 | 5.188041 |
| rs17642665     | GEMIN7  | 19 | 50286344 | 5 | 0.352236 |
| rs3745157      | GEMIN7  | 19 | 50286435 | 6 | 1.581306 |
| rs3745157      | GEMIN7  | 19 | 50286435 | 7 | 1.243658 |
| rs3745157      | GEMIN7  | 19 | 50286435 | 8 | 2.333362 |
| rs11667430     | EXOC3L2 | 19 | 50408037 | 3 | 0.301502 |
| rs11667430     | EXOC3L2 | 19 | 50408037 | 2 | 0.038787 |
| rs11667430     | EXOC3L2 | 19 | 50408037 | 1 | 0.391053 |
| rs11667430     | EXOC3L2 | 19 | 50408037 | 5 | 0.422318 |
| rs11667430     | EXOC3L2 | 19 | 50408037 | 6 | 0.888136 |
| rs2395         | MARK4   | 19 | 50498449 | 7 | 0.176253 |
| rs2395         | MARK4   | 19 | 50498449 | 5 | 4.735054 |
| rs2395         | MARK4   | 19 | 50498449 | 3 | 0.035102 |
| rs10415720     | MARK4   | 19 | 50499771 | 1 | 0.542483 |
| rs10415720     | MARK4   | 19 | 50499771 | 7 | 0.135539 |
| rs10415720     | MARK4   | 19 | 50499771 | 5 | 0.431966 |
| rs12971645     | MARK4   | 19 | 50499785 | 1 | 0.770679 |
| rs4884         | CKM     | 19 | 50501875 | 5 | 4.54897  |
| rs4884         | CKM     | 19 | 50501875 | 3 | 0.433112 |
| rs4884         | CKM     | 19 | 50501875 | 7 | 1.336089 |
| rs17875616     | CKM     | 19 | 50506873 | 4 | 4.44981  |
| rs17875616     | CKM     | 19 | 50506873 | 3 | 4.443688 |
| rs1133190      | CKM     | 19 | 50510675 | 3 | 0.795932 |
| rs967591       | CD3EAP  | 19 | 50601774 | 3 | 0.482308 |
| rs1007616      | CD3EAP  | 19 | 50604933 | 1 | 0.3802   |
| rs1007616      | CD3EAP  | 19 | 50604933 | 8 | 0.015575 |
| rs28381239     | FOSB    | 19 | 50663206 | 7 | 1.114393 |
| rs28381239     | FOSB    | 19 | 50663206 | 5 | 0.91322  |
| rs28381239     | FOSB    | 19 | 50663206 | 1 | 0.878216 |
| rs2282695      | FOSB    | 19 | 50663801 | 5 | 7.122887 |

|                |           |    |          |   |          |
|----------------|-----------|----|----------|---|----------|
| rs708905       | FOSB      | 19 | 50669312 | 4 | 1.583591 |
| rs708905       | FOSB      | 19 | 50669312 | 2 | 5.908739 |
| rs3745821      | FLJ40125  | 19 | 50694296 | 3 | 0.376095 |
| rs3745821      | FLJ40125  | 19 | 50694296 | 1 | 0.731551 |
| rs3745821      | FLJ40125  | 19 | 50694296 | 7 | 1.634685 |
| rs2301283      | VASP      | 19 | 50716424 | 3 | 0.865379 |
| rs1045217      | GPR4      | 19 | 50785051 | 5 | 0.954689 |
| rs1045217      | GPR4      | 19 | 50785051 | 3 | 1.238132 |
| rs3745818      | GPR4      | 19 | 50787491 | 3 | 0.698165 |
| rs3745818      | GPR4      | 19 | 50787491 | 5 | 0.625089 |
| rs1800437      | GIPR      | 19 | 50873232 | 6 | 0.91848  |
| rs1800437      | GIPR      | 19 | 50873232 | 4 | 0.731312 |
| rs1800437      | GIPR      | 19 | 50873232 | 2 | 4.088482 |
| rs1800437      | GIPR      | 19 | 50873232 | 7 | 0.203662 |
| rs1800437      | GIPR      | 19 | 50873232 | 3 | 0.317017 |
| rs1800437      | GIPR      | 19 | 50873232 | 5 | 0.597829 |
| rs12709891     | GIPR      | 19 | 50877057 | 8 | 2.388007 |
| rs2014576      | SIX5      | 19 | 50960916 | 1 | 0.372711 |
| rs2014576      | SIX5      | 19 | 50960916 | 4 | 0.453441 |
| rs2014576      | SIX5      | 19 | 50960916 | 3 | 0.578621 |
| GA034759       | DMWD      | 19 | 50981349 | 6 | 2.01381  |
| rs2303014      | SYMPK     | 19 | 51043962 | 7 | 0.705415 |
| rs2303014      | SYMPK     | 19 | 51043962 | 8 | 0.187071 |
| rs2303014      | SYMPK     | 19 | 51043962 | 5 | 0.520515 |
| rs2303014      | SYMPK     | 19 | 51043962 | 6 | 2.491293 |
| rs16980091     | FOXA3     | 19 | 51067619 | 5 | 1.716925 |
| rs16980091     | FOXA3     | 19 | 51067619 | 1 | 0.734871 |
| rs16980091     | FOXA3     | 19 | 51067619 | 6 | 0.965609 |
| rs16980091     | FOXA3     | 19 | 51067619 | 3 | 1.087185 |
| rs10423899     | LOC339344 | 19 | 51096419 | 1 | 4.538735 |
| rs10423899     | LOC339344 | 19 | 51096419 | 6 | 0.272337 |
| rs8111011      | NANOS2    | 19 | 51108487 | 3 | 0.448953 |
| rs8111011      | NANOS2    | 19 | 51108487 | 5 | 0.476852 |
| rs1422627      | NANOS2    | 19 | 51108578 | 3 | 0.467976 |
| rs1047061      | NOVA2     | 19 | 51135726 | 7 | 2.198433 |
| rs1047061      | NOVA2     | 19 | 51135726 | 3 | 1.660838 |
| rs1047061      | NOVA2     | 19 | 51135726 | 1 | 3.069475 |
| SNP19-51210522 | CCDC61    | 19 | 51210522 | 5 | 0.391049 |
| SNP19-51210522 | CCDC61    | 19 | 51210522 | 1 | 3.309433 |
| rs17271272     | IGFL4     | 19 | 51235406 | 1 | 3.155183 |
| rs10408162     | IGFL2     | 19 | 51356240 | 5 | 0.974886 |
| SNP19-51425249 | IGFL1     | 19 | 51425249 | 1 | 0.665979 |
| SNP19-51425249 | IGFL1     | 19 | 51425249 | 2 | 0.020244 |
| SNP19-51425249 | IGFL1     | 19 | 51425249 | 8 | 5.150072 |
| SNP19-51504291 | HIF3A     | 19 | 51504291 | 7 | 0.506464 |
| rs3764609      | HIF3A     | 19 | 51515542 | 6 | 1.264281 |
| rs917948       | PPP5C     | 19 | 51548855 | 7 | 0.297406 |

|                |           |    |          |   |          |
|----------------|-----------|----|----------|---|----------|
| GA034771       | PNMAL1    | 19 | 51665821 | 4 | 1.694643 |
| GA034771       | PNMAL1    | 19 | 51665821 | 7 | 2.435816 |
| GA034771       | PNMAL1    | 19 | 51665821 | 6 | 1.376743 |
| rs12978825     | PNMAL1    | 19 | 51666146 | 4 | 2.17971  |
| rs12978825     | PNMAL1    | 19 | 51666146 | 7 | 2.191911 |
| rs12978825     | PNMAL1    | 19 | 51666146 | 6 | 2.364684 |
| rs4803967      | LOC400707 | 19 | 51690076 | 6 | 0.570424 |
| rs12974613     | GNG8      | 19 | 51829299 | 7 | 0.437272 |
| rs12974613     | GNG8      | 19 | 51829299 | 3 | 2.672764 |
| rs12974613     | GNG8      | 19 | 51829299 | 1 | 3.20234  |
| rs313841       | STRN4     | 19 | 51915789 | 1 | 6.534516 |
| rs2070246      | SLC1A5    | 19 | 51974002 | 3 | 0.604642 |
| rs2070246      | SLC1A5    | 19 | 51974002 | 4 | 0.098638 |
| rs2070246      | SLC1A5    | 19 | 51974002 | 6 | 3.455257 |
| rs3027952      | SLC1A5    | 19 | 51983410 | 3 | 0.754502 |
| rs10401590     | LOC390948 | 19 | 52005171 | 5 | 1.03367  |
| rs3745615      | NPAS1     | 19 | 52235614 | 7 | 0.572808 |
| rs3745615      | NPAS1     | 19 | 52235614 | 1 | 1.102975 |
| rs3745615      | NPAS1     | 19 | 52235614 | 6 | 0.066232 |
| rs889169       | NPAS1     | 19 | 52240518 | 4 | 0.491948 |
| rs889169       | NPAS1     | 19 | 52240518 | 6 | 0.134133 |
| rs889169       | NPAS1     | 19 | 52240518 | 1 | 2.920085 |
| rs12985905     | CCDC9     | 19 | 52453486 | 8 | 0.56309  |
| rs12985905     | CCDC9     | 19 | 52453486 | 7 | 1.218885 |
| rs12985905     | CCDC9     | 19 | 52453486 | 3 | 0.274908 |
| rs1064202      | DHX34     | 19 | 52547980 | 1 | 6.283566 |
| rs12984558     | DHX34     | 19 | 52548176 | 6 | 0.128695 |
| rs12984558     | DHX34     | 19 | 52548176 | 5 | 0.4893   |
| rs2245046      | DHX34     | 19 | 52550264 | 7 | 0.824937 |
| rs2694558      | DHX34     | 19 | 52571077 | 7 | 0.178166 |
| rs2547378      | DHX34     | 19 | 52577594 | 7 | 0.175858 |
| rs3745173      | SLC8A2    | 19 | 52624200 | 6 | 0.454958 |
| rs3745173      | SLC8A2    | 19 | 52624200 | 3 | 0.879717 |
| rs3745173      | SLC8A2    | 19 | 52624200 | 4 | 2.235168 |
| rs2272295      | KPTN      | 19 | 52670483 | 6 | 1.130919 |
| rs12972658     | ZNF541    | 19 | 52734788 | 6 | 0.112954 |
| rs2914439      | GLTSCR1   | 19 | 52874320 | 3 | 1.181852 |
| rs2914439      | GLTSCR1   | 19 | 52874320 | 1 | 0.582928 |
| rs2914439      | GLTSCR1   | 19 | 52874320 | 4 | 0.298102 |
| rs2914439      | GLTSCR1   | 19 | 52874320 | 5 | 0.005841 |
| rs2914439      | GLTSCR1   | 19 | 52874320 | 2 | 0.535404 |
| rs2911005      | GLTSCR1   | 19 | 52874380 | 4 | 0.456008 |
| rs2911005      | GLTSCR1   | 19 | 52874380 | 7 | 1.161611 |
| rs2911005      | GLTSCR1   | 19 | 52874380 | 5 | 0.628803 |
| rs2911005      | GLTSCR1   | 19 | 52874380 | 2 | 2.009608 |
| rs2911005      | GLTSCR1   | 19 | 52874380 | 8 | 0.422999 |
| SNP19-52951599 | GLTSCR2   | 19 | 52951599 | 6 | 0.705192 |

|                |           |    |          |   |          |
|----------------|-----------|----|----------|---|----------|
| SNP19-52951599 | GLTSCR2   | 19 | 52951599 | 4 | 1.044    |
| rs8101799      | LOC729626 | 19 | 52963864 | 4 | 0.023708 |
| rs8101799      | LOC729626 | 19 | 52963864 | 7 | 0.80868  |
| rs8106690      | LOC390949 | 19 | 52989690 | 2 | 1.244877 |
| rs8106690      | LOC390949 | 19 | 52989690 | 7 | 2.046172 |
| rs35445888     | TPRX1     | 19 | 52996817 | 3 | 0.856448 |
| rs7248427      | CRX       | 19 | 53037973 | 3 | 0.748141 |
| rs7248427      | CRX       | 19 | 53037973 | 5 | 0.78912  |
| rs11670620     | CRX       | 19 | 53038337 | 5 | 1.2907   |
| rs11670620     | CRX       | 19 | 53038337 | 4 | 2.373819 |
| rs10409288     | ELSPBP1   | 19 | 53189753 | 8 | 2.758346 |
| rs35535557     | CABP5     | 19 | 53236649 | 3 | 1.351657 |
| rs35535557     | CABP5     | 19 | 53236649 | 5 | 2.195536 |
| rs1045376      | PLA2G4C   | 19 | 53243221 | 1 | 1.708058 |
| rs9226         | PLA2G4C   | 19 | 53243358 | 8 | 3.709672 |
| rs9226         | PLA2G4C   | 19 | 53243358 | 7 | 0.022086 |
| rs9226         | PLA2G4C   | 19 | 53243358 | 3 | 1.673264 |
| rs251684       | PLA2G4C   | 19 | 53293266 | 2 | 3.789469 |
| rs251684       | PLA2G4C   | 19 | 53293266 | 5 | 2.309731 |
| rs2307279      | PLA2G4C   | 19 | 53300410 | 5 | 3.097803 |
| rs2307279      | PLA2G4C   | 19 | 53300410 | 4 | 3.342312 |
| rs11564500     | PLA2G4C   | 19 | 53305809 | 3 | 0.516466 |
| rs20581        | LIG1      | 19 | 53314239 | 3 | 0.060885 |
| rs20581        | LIG1      | 19 | 53314239 | 6 | 3.126888 |
| rs20579        | LIG1      | 19 | 53360642 | 1 | 3.072007 |
| rs20579        | LIG1      | 19 | 53360642 | 7 | 0.138578 |
| rs1968441      | CARD8     | 19 | 53403601 | 8 | 6.593567 |
| rs1968440      | CARD8     | 19 | 53403714 | 8 | 1.672612 |
| rs2043211      | CARD8     | 19 | 53429518 | 3 | 0.27353  |
| rs2043211      | CARD8     | 19 | 53429518 | 4 | 0.232646 |
| rs2043211      | CARD8     | 19 | 53429518 | 6 | 7.546446 |
| rs2043211      | CARD8     | 19 | 53429518 | 5 | 6.176303 |
| rs2242463      | CCDC114   | 19 | 53498789 | 2 | 4.664289 |
| rs2242463      | CCDC114   | 19 | 53498789 | 4 | 0.255952 |
| rs8355         | EMP3      | 19 | 53525612 | 2 | 2.647385 |
| rs8355         | EMP3      | 19 | 53525612 | 4 | 0.493695 |
| rs8355         | EMP3      | 19 | 53525612 | 1 | 0.412134 |
| rs8355         | EMP3      | 19 | 53525612 | 7 | 0.611346 |
| rs3826828      | TMEM143   | 19 | 53528485 | 6 | 0.312158 |
| rs3826828      | TMEM143   | 19 | 53528485 | 7 | 0.828376 |
| rs919804       | SYNGR4    | 19 | 53560990 | 5 | 0.872941 |
| rs1050671      | KDELR1    | 19 | 53577730 | 7 | 2.897702 |
| rs1050671      | KDELR1    | 19 | 53577730 | 2 | 7.046717 |
| rs8111684      | GRIN2D    | 19 | 53639138 | 3 | 0.77644  |
| rs8111684      | GRIN2D    | 19 | 53639138 | 2 | 0.484477 |
| rs2544794      | SULT2B1   | 19 | 53771058 | 3 | 0.151483 |
| rs2544794      | SULT2B1   | 19 | 53771058 | 1 | 5.195132 |

|                |           |    |          |   |          |
|----------------|-----------|----|----------|---|----------|
| rs368654       | FAM83E    | 19 | 53808367 | 7 | 0.415163 |
| rs368654       | FAM83E    | 19 | 53808367 | 1 | 2.821309 |
| rs443527       | FAM83E    | 19 | 53808572 | 6 | 3.200786 |
| rs443527       | FAM83E    | 19 | 53808572 | 2 | 3.211754 |
| rs443527       | FAM83E    | 19 | 53808572 | 4 | 4.063772 |
| rs281391       | LOC126147 | 19 | 53856552 | 2 | 2.636653 |
| rs281391       | LOC126147 | 19 | 53856552 | 5 | 0.101063 |
| rs3826838      | LOC653677 | 19 | 53875096 | 2 | 2.491825 |
| rs1800027      | FUT2      | 19 | 53898538 | 1 | 4.874287 |
| rs569970       | FUT2      | 19 | 53899530 | 4 | 0.790837 |
| rs569970       | FUT2      | 19 | 53899530 | 1 | 3.349073 |
| rs569970       | FUT2      | 19 | 53899530 | 8 | 0.606275 |
| rs569970       | FUT2      | 19 | 53899530 | 6 | 0.746748 |
| rs281385       | FLJ36070  | 19 | 53909073 | 1 | 3.102211 |
| rs281385       | FLJ36070  | 19 | 53909073 | 5 | 0.499899 |
| SNP19-53909923 | FLJ36070  | 19 | 53909923 | 6 | 0.382993 |
| SNP19-53909923 | FLJ36070  | 19 | 53909923 | 1 | 2.42262  |
| SNP19-53909923 | FLJ36070  | 19 | 53909923 | 4 | 0.196868 |
| SNP19-53909923 | FLJ36070  | 19 | 53909923 | 5 | 0.723631 |
| rs2307019      | IZUMO1    | 19 | 53936032 | 2 | 1.629362 |
| rs2307019      | IZUMO1    | 19 | 53936032 | 1 | 2.156817 |
| rs2307019      | IZUMO1    | 19 | 53936032 | 5 | 2.088333 |
| rs2307019      | IZUMO1    | 19 | 53936032 | 6 | 1.360512 |
| rs2307019      | IZUMO1    | 19 | 53936032 | 8 | 2.358126 |
| rs2307019      | IZUMO1    | 19 | 53936032 | 4 | 2.044268 |
| rs8108468      | IZUMO1    | 19 | 53939598 | 4 | 2.420338 |
| rs8108468      | IZUMO1    | 19 | 53939598 | 2 | 0.697885 |
| rs8108468      | IZUMO1    | 19 | 53939598 | 8 | 2.257119 |
| rs8108468      | IZUMO1    | 19 | 53939598 | 1 | 1.779931 |
| rs8108468      | IZUMO1    | 19 | 53939598 | 6 | 1.230531 |
| rs8108468      | IZUMO1    | 19 | 53939598 | 5 | 2.371274 |
| rs12975781     | IZUMO1    | 19 | 53941510 | 1 | 0.135756 |
| rs12975781     | IZUMO1    | 19 | 53941510 | 8 | 0.528277 |
| rs12975781     | IZUMO1    | 19 | 53941510 | 5 | 0.267618 |
| rs8102032      | IZUMO1    | 19 | 53941607 | 1 | 0.485441 |
| rs8102032      | IZUMO1    | 19 | 53941607 | 5 | 0.623961 |
| rs8102032      | IZUMO1    | 19 | 53941607 | 6 | 1.588129 |
| rs8104897      | IZUMO1    | 19 | 53941626 | 1 | 0.396136 |
| rs8105137      | IZUMO1    | 19 | 53941700 | 1 | 0.807774 |
| rs8105137      | IZUMO1    | 19 | 53941700 | 5 | 1.046952 |
| rs8105137      | IZUMO1    | 19 | 53941700 | 6 | 0.011114 |
| rs12611028     | FUT1      | 19 | 53944801 | 2 | 0.78037  |
| rs12611028     | FUT1      | 19 | 53944801 | 6 | 0.421645 |
| rs12611028     | FUT1      | 19 | 53944801 | 1 | 0.517198 |
| rs4015         | FUT1      | 19 | 53945201 | 1 | 0.266018 |
| rs4015         | FUT1      | 19 | 53945201 | 2 | 0.3943   |
| rs4015         | FUT1      | 19 | 53945201 | 6 | 2.305524 |



|                |          |    |          |   |          |
|----------------|----------|----|----------|---|----------|
| SNP19-53953180 | FGF21    | 19 | 53953180 | 1 | 0.922465 |
| rs8110220      | HSD17B14 | 19 | 54030910 | 1 | 2.847564 |
| rs506425       | PLEKHA4  | 19 | 54060655 | 8 | 0.893699 |
| rs506425       | PLEKHA4  | 19 | 54060655 | 6 | 0.217898 |
| SNP19-54068396 | PPP1R15A | 19 | 54068396 | 4 | 0.134882 |
| SNP19-54068396 | PPP1R15A | 19 | 54068396 | 3 | 0.420629 |
| rs557806       | PPP1R15A | 19 | 54069054 | 6 | 6.388899 |
| rs556052       | PPP1R15A | 19 | 54069248 | 6 | 0.354165 |
| rs8112811      | TULP2    | 19 | 54083216 | 5 | 1.43562  |
| rs1058483      | NUCB1    | 19 | 54099472 | 8 | 3.371448 |
| rs2270941      | DHDH     | 19 | 54130175 | 5 | 0.025087 |
| rs2270939      | DHDH     | 19 | 54134745 | 4 | 4.09275  |
| rs2270939      | DHDH     | 19 | 54134745 | 5 | 5.197867 |
| rs10423255     | DHDH     | 19 | 54137586 | 4 | 1.085012 |
| rs11666105     | DHDH     | 19 | 54137629 | 5 | 1.434963 |
| rs11666105     | DHDH     | 19 | 54137629 | 4 | 0.382647 |
| rs2287754      | GYS1     | 19 | 54188306 | 4 | 0.477863 |
| rs2287754      | GYS1     | 19 | 54188306 | 7 | 0.625263 |
| rs12461085     | CGB7     | 19 | 54250541 | 8 | 4.894445 |
| rs12461085     | CGB7     | 19 | 54250541 | 6 | 2.9833   |
| rs12461085     | CGB7     | 19 | 54250541 | 4 | 1.39452  |
| rs12461085     | CGB7     | 19 | 54250541 | 2 | 2.120545 |
| rs12461085     | CGB7     | 19 | 54250541 | 7 | 0.15194  |
| rs12461088     | CGB7     | 19 | 54250591 | 7 | 3.775237 |
| rs17206784     | KCNA7    | 19 | 54262925 | 3 | 0.008448 |
| rs11673003     | KCNA7    | 19 | 54263769 | 3 | 0.257603 |
| rs11083959     | KCNA7    | 19 | 54265018 | 8 | 0.40649  |
| rs11083959     | KCNA7    | 19 | 54265018 | 4 | 0.430956 |
| rs11083959     | KCNA7    | 19 | 54265018 | 1 | 0.773435 |
| rs1017219      | KCNA7    | 19 | 54265250 | 1 | 0.836855 |
| rs3810188      | KCNA7    | 19 | 54265330 | 3 | 0.545665 |
| rs1611775      | KCNA7    | 19 | 54265937 | 4 | 4.070889 |
| rs1611775      | KCNA7    | 19 | 54265937 | 2 | 0.638696 |
| rs1611775      | KCNA7    | 19 | 54265937 | 6 | 0.521118 |
| rs1611775      | KCNA7    | 19 | 54265937 | 8 | 5.957569 |
| rs1611775      | KCNA7    | 19 | 54265937 | 1 | 0.045584 |
| rs4802551      | SNRP70   | 19 | 54280367 | 3 | 0.878241 |
| rs2232003      | FLJ10490 | 19 | 54313776 | 7 | 0.614864 |
| rs2232003      | FLJ10490 | 19 | 54313776 | 5 | 3.165629 |
| rs2232003      | FLJ10490 | 19 | 54313776 | 3 | 0.72224  |
| rs2232003      | FLJ10490 | 19 | 54313776 | 8 | 0.07032  |
| rs2303053      | PPFIA3   | 19 | 54331814 | 5 | 0.114996 |
| rs2303053      | PPFIA3   | 19 | 54331814 | 7 | 0.402871 |
| SNP19-54350021 | HRC      | 19 | 54350021 | 1 | 0.725828 |
| SNP19-54350021 | HRC      | 19 | 54350021 | 5 | 0.561836 |
| SNP19-54350021 | HRC      | 19 | 54350021 | 7 | 0.439132 |
| rs3745298      | HRC      | 19 | 54350179 | 5 | 1.14125  |

|                |          |    |          |   |          |
|----------------|----------|----|----------|---|----------|
| rs3745299      | HRC      | 19 | 54350202 | 7 | 2.292147 |
| rs3745299      | HRC      | 19 | 54350202 | 5 | 1.673253 |
| rs1054770      | DKKL1    | 19 | 54569927 | 7 | 0.504371 |
| rs1054770      | DKKL1    | 19 | 54569927 | 5 | 0.425524 |
| rs2288481      | DKKL1    | 19 | 54570008 | 5 | 0.953113 |
| rs2288481      | DKKL1    | 19 | 54570008 | 6 | 0.383714 |
| rs2288481      | DKKL1    | 19 | 54570008 | 7 | 0.789003 |
| rs10421748     | FLJ32658 | 19 | 54593130 | 6 | 0.574836 |
| rs10421748     | FLJ32658 | 19 | 54593130 | 5 | 1.362086 |
| rs1043558      | SLC17A7  | 19 | 54624574 | 5 | 0.060779 |
| rs13394        | PIH1D1   | 19 | 54642110 | 4 | 0.174281 |
| rs13394        | PIH1D1   | 19 | 54642110 | 5 | 4.51212  |
| rs13394        | PIH1D1   | 19 | 54642110 | 3 | 1.081227 |
| rs1320303      | ALDH16A1 | 19 | 54656789 | 3 | 0.854501 |
| rs1320303      | ALDH16A1 | 19 | 54656789 | 5 | 6.068919 |
| rs2293009      | ALDH16A1 | 19 | 54659492 | 1 | 0.809956 |
| rs2293009      | ALDH16A1 | 19 | 54659492 | 7 | 0.850011 |
| rs2293009      | ALDH16A1 | 19 | 54659492 | 3 | 0.583203 |
| GA034912       | ALDH16A1 | 19 | 54659793 | 1 | 2.343837 |
| GA034912       | ALDH16A1 | 19 | 54659793 | 5 | 0.407034 |
| GA034912       | ALDH16A1 | 19 | 54659793 | 4 | 0.18962  |
| rs11669553     | RPL13A   | 19 | 54687348 | 5 | 0.09311  |
| rs2878342      | FCGRT    | 19 | 54709536 | 7 | 0.153004 |
| rs2878342      | FCGRT    | 19 | 54709536 | 1 | 3.488325 |
| rs3745474      | PRRG2    | 19 | 54778618 | 7 | 1.553996 |
| rs11083979     | PRR12    | 19 | 54787956 | 7 | 0.702124 |
| rs11083979     | PRR12    | 19 | 54787956 | 3 | 0.538742 |
| rs3745475      | PRR12    | 19 | 54792107 | 3 | 0.346068 |
| rs3745475      | PRR12    | 19 | 54792107 | 7 | 0.941189 |
| rs2304206      | BCL2L12  | 19 | 54860683 | 1 | 5.321674 |
| rs2304206      | BCL2L12  | 19 | 54860683 | 8 | 0.877578 |
| rs2304206      | BCL2L12  | 19 | 54860683 | 7 | 0.812403 |
| rs2304204      | IRF3     | 19 | 54860832 | 1 | 3.926681 |
| rs2304204      | IRF3     | 19 | 54860832 | 8 | 4.410667 |
| rs2304204      | IRF3     | 19 | 54860832 | 7 | 0.738954 |
| rs2305921      | FUZ      | 19 | 55004465 | 6 | 0.200097 |
| SNP19-55052801 | PTOV1    | 19 | 55052801 | 3 | 0.108009 |
| SNP19-55052801 | PTOV1    | 19 | 55052801 | 1 | 1.951742 |
| rs731826       | TBC1D17  | 19 | 55072670 | 3 | 1.13234  |
| rs731826       | TBC1D17  | 19 | 55072670 | 5 | 0.302954 |
| rs731826       | TBC1D17  | 19 | 55072670 | 2 | 3.891917 |
| rs731826       | TBC1D17  | 19 | 55072670 | 4 | 1.169178 |
| rs731826       | TBC1D17  | 19 | 55072670 | 7 | 0.735227 |
| rs3745486      | TBC1D17  | 19 | 55075448 | 5 | 1.439509 |
| rs3745486      | TBC1D17  | 19 | 55075448 | 3 | 1.672656 |
| rs3745486      | TBC1D17  | 19 | 55075448 | 4 | 1.3644   |
| rs1290754      | IL4I1    | 19 | 55096751 | 7 | 0.326875 |

|                |           |    |          |   |          |
|----------------|-----------|----|----------|---|----------|
| rs1290754      | IL4I1     | 19 | 55096751 | 3 | 0.434416 |
| rs1290754      | IL4I1     | 19 | 55096751 | 1 | 0.501451 |
| rs9304690      | SIGLEC11  | 19 | 55145129 | 7 | 2.349317 |
| rs2278410      | VRK3      | 19 | 55220530 | 7 | 0.317894 |
| rs2278410      | VRK3      | 19 | 55220530 | 6 | 0.743491 |
| rs2278410      | VRK3      | 19 | 55220530 | 5 | 0.242212 |
| rs3745504      | MYH14     | 19 | 55463421 | 6 | 0.110409 |
| rs3745504      | MYH14     | 19 | 55463421 | 1 | 0.695405 |
| rs3745504      | MYH14     | 19 | 55463421 | 2 | 0.761938 |
| rs3745504      | MYH14     | 19 | 55463421 | 3 | 1.965728 |
| rs11669191     | MYH14     | 19 | 55471894 | 3 | 0.843248 |
| rs11669191     | MYH14     | 19 | 55471894 | 4 | 0.94579  |
| SNP19-55557347 | NAPSA     | 19 | 55557347 | 5 | 1.369177 |
| rs1137895      | SPIB      | 19 | 55623776 | 7 | 0.750603 |
| rs25668        | MYBPC2    | 19 | 55657084 | 7 | 1.387661 |
| rs25668        | MYBPC2    | 19 | 55657084 | 1 | 1.977096 |
| rs25668        | MYBPC2    | 19 | 55657084 | 3 | 0.505304 |
| rs889131       | LOC554235 | 19 | 55709647 | 3 | 1.5379   |
| rs889131       | LOC554235 | 19 | 55709647 | 7 | 1.307102 |
| rs889131       | LOC554235 | 19 | 55709647 | 1 | 0.524196 |
| rs2287820      | SYT3      | 19 | 55832501 | 3 | 0.377735 |
| rs2287819      | SYT3      | 19 | 55832564 | 3 | 0.545972 |
| rs41275782     | SHANK1    | 19 | 55864338 | 8 | 0.934546 |
| SNP19-55989638 | ACPT      | 19 | 55989638 | 1 | 0.266219 |
| SNP19-55989638 | ACPT      | 19 | 55989638 | 2 | 0.40575  |
| SNP19-55989638 | ACPT      | 19 | 55989638 | 5 | 0.09429  |
| SNP19-55989638 | ACPT      | 19 | 55989638 | 8 | 4.46927  |
| rs3745526      | C19orf48  | 19 | 55994014 | 5 | 0.60181  |
| rs3745526      | C19orf48  | 19 | 55994014 | 8 | 3.806372 |
| rs3745526      | C19orf48  | 19 | 55994014 | 1 | 0.242642 |
| SNP19-56015044 | KLK1      | 19 | 56015044 | 7 | 0.111253 |
| SNP19-56015044 | KLK1      | 19 | 56015044 | 5 | 0.823566 |
| SNP19-56015044 | KLK1      | 19 | 56015044 | 2 | 2.437977 |
| rs5516         | KLK1      | 19 | 56015285 | 6 | 4.852678 |
| rs5516         | KLK1      | 19 | 56015285 | 1 | 0.559085 |
| rs5516         | KLK1      | 19 | 56015285 | 2 | 0.180378 |
| rs5516         | KLK1      | 19 | 56015285 | 3 | 0.145776 |
| rs5515         | KLK1      | 19 | 56015488 | 8 | 4.930217 |
| rs3212810      | KLK15     | 19 | 56020548 | 5 | 0.432252 |
| rs2659122      | KLK3      | 19 | 56054838 | 1 | 0.302506 |
| rs1058205      | KLK3      | 19 | 56055210 | 1 | 1.478683 |
| rs1058205      | KLK3      | 19 | 56055210 | 7 | 2.132951 |
| rs1058274      | KLK3      | 19 | 56055260 | 7 | 1.129458 |
| rs1058274      | KLK3      | 19 | 56055260 | 5 | 1.810118 |
| rs1058274      | KLK3      | 19 | 56055260 | 1 | 2.106722 |
| rs198972       | KLK2      | 19 | 56071705 | 1 | 1.055684 |
| rs198972       | KLK2      | 19 | 56071705 | 5 | 0.95215  |

|                |           |    |          |   |          |
|----------------|-----------|----|----------|---|----------|
| rs198972       | KLK2      | 19 | 56071705 | 8 | 1.332008 |
| SNP19-56073589 | KLK2      | 19 | 56073589 | 4 | 1.367166 |
| rs1654552      | KLK4      | 19 | 56104478 | 7 | 0.274901 |
| rs1701950      | KLK6      | 19 | 56156908 | 1 | 0.016746 |
| rs1701950      | KLK6      | 19 | 56156908 | 2 | 0.417004 |
| rs1654528      | KLK7      | 19 | 56172652 | 2 | 2.634828 |
| rs10404395     | KLK9      | 19 | 56197908 | 8 | 0.182258 |
| rs10404395     | KLK9      | 19 | 56197908 | 3 | 0.046605 |
| rs2659096      | KLK9      | 19 | 56197960 | 1 | 0.374085 |
| rs2659096      | KLK9      | 19 | 56197960 | 5 | 6.312746 |
| rs2659096      | KLK9      | 19 | 56197960 | 8 | 6.900748 |
| rs2659096      | KLK9      | 19 | 56197960 | 4 | 0.844996 |
| rs2569454      | KLK10     | 19 | 56215015 | 2 | 0.366319 |
| rs1048328      | KLK11     | 19 | 56219176 | 4 | 2.402747 |
| rs8104554      | KLK12     | 19 | 56229928 | 1 | 1.573019 |
| rs8104554      | KLK12     | 19 | 56229928 | 4 | 2.621028 |
| rs8104554      | KLK12     | 19 | 56229928 | 6 | 4.426856 |
| rs2569491      | KLK14     | 19 | 56276728 | 1 | 2.501996 |
| rs2569491      | KLK14     | 19 | 56276728 | 7 | 0.538258 |
| rs2569491      | KLK14     | 19 | 56276728 | 3 | 1.251055 |
| rs35287116     | KLK14     | 19 | 56276763 | 7 | 0.081353 |
| rs17801681     | SIGLECP3  | 19 | 56368461 | 4 | 0.634135 |
| rs35112940     | CD33      | 19 | 56430729 | 5 | 0.005321 |
| rs3887787      | LOC402665 | 19 | 56525816 | 7 | 2.932508 |
| rs3887787      | LOC402665 | 19 | 56525816 | 2 | 2.351183 |
| rs3009         | NKG7      | 19 | 56566762 | 5 | 0.856526 |
| rs3009         | NKG7      | 19 | 56566762 | 7 | 0.677227 |
| rs3810092      | LOC147646 | 19 | 56583369 | 3 | 0.009899 |
| rs3826657      | LOC147646 | 19 | 56583660 | 7 | 0.515819 |
| rs3826657      | LOC147646 | 19 | 56583660 | 5 | 4.425705 |
| rs3826657      | LOC147646 | 19 | 56583660 | 1 | 5.281016 |
| rs3826659      | LOC147646 | 19 | 56583721 | 1 | 1.836421 |
| rs3826659      | LOC147646 | 19 | 56583721 | 5 | 0.199187 |
| rs3826660      | LOC147646 | 19 | 56583794 | 1 | 2.721494 |
| rs3826660      | LOC147646 | 19 | 56583794 | 7 | 1.967002 |
| rs3826660      | LOC147646 | 19 | 56583794 | 5 | 1.773043 |
| rs3826663      | LOC147646 | 19 | 56583847 | 5 | 0.036934 |
| rs3826663      | LOC147646 | 19 | 56583847 | 7 | 0.227517 |
| rs3826663      | LOC147646 | 19 | 56583847 | 1 | 3.365049 |
| rs3826664      | LOC147646 | 19 | 56583921 | 7 | 1.055786 |
| rs3826665      | LOC147646 | 19 | 56584030 | 5 | 0.140023 |
| rs3826665      | LOC147646 | 19 | 56584030 | 1 | 2.424362 |
| rs1974821      | SIGLEC10  | 19 | 56609547 | 5 | 0.018871 |
| rs1974821      | SIGLEC10  | 19 | 56609547 | 3 | 0.260023 |
| rs36491        | SIGLEC8   | 19 | 56647438 | 2 | 1.050309 |
| rs36491        | SIGLEC8   | 19 | 56647438 | 5 | 3.474353 |
| SNP19-56724970 | SIGLEC6   | 19 | 56724970 | 6 | 0.53441  |

|                |           |    |          |   |          |
|----------------|-----------|----|----------|---|----------|
| SNP19-56724970 | SIGLEC6   | 19 | 56724970 | 1 | 1.380369 |
| SNP19-56724970 | SIGLEC6   | 19 | 56724970 | 7 | 0.822173 |
| rs1551559      | SIGLEC6   | 19 | 56726752 | 1 | 0.46442  |
| rs1551559      | SIGLEC6   | 19 | 56726752 | 4 | 1.153976 |
| SNP19-56781826 | ZNF175    | 19 | 56781826 | 2 | 1.190524 |
| SNP19-56781826 | ZNF175    | 19 | 56781826 | 3 | 0.612862 |
| rs12975196     | FLJ30403  | 19 | 56786249 | 2 | 1.030344 |
| rs12975196     | FLJ30403  | 19 | 56786249 | 6 | 0.653065 |
| rs12975196     | FLJ30403  | 19 | 56786249 | 1 | 1.556163 |
| rs6509556      | FLJ30403  | 19 | 56786328 | 1 | 2.352014 |
| rs7259649      | FLJ30403  | 19 | 56787253 | 6 | 0.96404  |
| rs7259649      | FLJ30403  | 19 | 56787253 | 1 | 0.371807 |
| rs7259649      | FLJ30403  | 19 | 56787253 | 8 | 0.860877 |
| rs7259649      | FLJ30403  | 19 | 56787253 | 2 | 0.529433 |
| rs3794983      | FLJ30403  | 19 | 56787865 | 7 | 0.663232 |
| rs3794982      | FLJ30403  | 19 | 56788082 | 7 | 0.178432 |
| rs2278831      | SIGLEC5   | 19 | 56822931 | 1 | 1.899347 |
| rs2167418      | LOC729781 | 19 | 56896754 | 5 | 0.693717 |
| rs2167418      | LOC729781 | 19 | 56896754 | 3 | 0.540794 |
| rs2167418      | LOC729781 | 19 | 56896754 | 8 | 3.520042 |
| rs2167418      | LOC729781 | 19 | 56896754 | 6 | 1.32168  |
| rs3829649      | HAS1      | 19 | 56908276 | 4 | 0.50162  |
| rs3829649      | HAS1      | 19 | 56908276 | 8 | 1.857311 |
| rs3829647      | HAS1      | 19 | 56908375 | 2 | 2.092177 |
| rs3829647      | HAS1      | 19 | 56908375 | 7 | 0.487931 |
| rs3829647      | HAS1      | 19 | 56908375 | 3 | 0.533241 |
| rs3829647      | HAS1      | 19 | 56908375 | 6 | 0.120786 |
| rs867341       | FPR1      | 19 | 56940932 | 3 | 0.234155 |
| rs2070745      | FPR1      | 19 | 56941759 | 4 | 3.201618 |
| rs17695052     | FPRL1     | 19 | 56965038 | 1 | 0.861448 |
| rs3752125      | FPRL2     | 19 | 57019596 | 3 | 0.256407 |
| rs7253924      | FPRL2     | 19 | 57020025 | 3 | 0.879665 |
| rs9807901      | ZNF577    | 19 | 57066514 | 7 | 0.190383 |
| rs8113388      | ZNF577    | 19 | 57067051 | 8 | 0.713471 |
| rs8113388      | ZNF577    | 19 | 57067051 | 2 | 4.263715 |
| rs8113388      | ZNF577    | 19 | 57067051 | 7 | 0.9093   |
| rs8113388      | ZNF577    | 19 | 57067051 | 4 | 4.03918  |
| rs8113388      | ZNF577    | 19 | 57067051 | 3 | 0.904956 |
| rs1055408      | ZNF577    | 19 | 57067236 | 3 | 0.564404 |
| rs1055408      | ZNF577    | 19 | 57067236 | 7 | 0.44416  |
| rs1055408      | ZNF577    | 19 | 57067236 | 4 | 0.669429 |
| rs1055408      | ZNF577    | 19 | 57067236 | 8 | 0.014447 |
| rs1055408      | ZNF577    | 19 | 57067236 | 2 | 5.881413 |
| rs6509586      | ZNF577    | 19 | 57067326 | 7 | 1.048744 |
| rs10407911     | ZNF577    | 19 | 57067931 | 7 | 0.609621 |
| rs10407547     | ZNF577    | 19 | 57067938 | 7 | 0.664509 |
| rs9807842      | ZNF577    | 19 | 57068019 | 7 | 0.326686 |

|                |         |    |          |   |          |
|----------------|---------|----|----------|---|----------|
| rs6509592      | ZNF649  | 19 | 57084962 | 8 | 6.554547 |
| rs6509592      | ZNF649  | 19 | 57084962 | 3 | 1.23957  |
| rs6509592      | ZNF649  | 19 | 57084962 | 2 | 4.180615 |
| rs6509592      | ZNF649  | 19 | 57084962 | 7 | 5.448419 |
| rs12461478     | ZNF613  | 19 | 57122551 | 7 | 2.049619 |
| rs12461478     | ZNF613  | 19 | 57122551 | 1 | 1.795547 |
| rs4986770      | ZNF350  | 19 | 57159846 | 2 | 4.037765 |
| rs12462876     | ZNF614  | 19 | 57209050 | 3 | 0.034556 |
| rs11670943     | ZNF432  | 19 | 57243771 | 2 | 1.528055 |
| rs3752120      | ZNF432  | 19 | 57243833 | 3 | 0.187959 |
| rs10413435     | PPP2R1A | 19 | 57420842 | 5 | 0.044533 |
| rs10413435     | PPP2R1A | 19 | 57420842 | 7 | 4.580639 |
| SNP19-57516844 | ZNF480  | 19 | 57516844 | 1 | 4.878821 |
| SNP19-57516844 | ZNF480  | 19 | 57516844 | 6 | 0.523952 |
| rs1961205      | ZNF610  | 19 | 57548767 | 5 | 1.508133 |
| SNP19-57749291 | ZNF808  | 19 | 57749291 | 6 | 0.029667 |
| SNP19-57749291 | ZNF808  | 19 | 57749291 | 1 | 4.998158 |
| SNP19-57749291 | ZNF808  | 19 | 57749291 | 4 | 3.853579 |
| rs12986137     | ZNF808  | 19 | 57751684 | 4 | 0.654406 |
| rs2279152      | ZNF137  | 19 | 57791787 | 6 | 1.29126  |
| rs2279152      | ZNF137  | 19 | 57791787 | 7 | 0.07988  |
| rs7250630      | ZNF137  | 19 | 57792135 | 6 | 0.710011 |
| rs7250630      | ZNF137  | 19 | 57792135 | 1 | 6.518385 |
| rs7250630      | ZNF137  | 19 | 57792135 | 3 | 0.169857 |
| rs1802617      | ZNF137  | 19 | 57792397 | 1 | 4.285436 |
| rs1802617      | ZNF137  | 19 | 57792397 | 7 | 2.331392 |
| rs1802617      | ZNF137  | 19 | 57792397 | 6 | 0.80487  |
| rs11668347     | ZNF137  | 19 | 57794680 | 8 | 5.115785 |
| rs4664         | ZNF83   | 19 | 57807597 | 1 | 4.261233 |
| rs10775556     | ZNF83   | 19 | 57830234 | 7 | 0.207704 |
| rs10775556     | ZNF83   | 19 | 57830234 | 1 | 1.074611 |
| rs8104631      | ZNF600  | 19 | 57959291 | 5 | 0.315328 |
| rs11667063     | ZNF600  | 19 | 57959318 | 6 | 0.062441 |
| rs11667063     | ZNF600  | 19 | 57959318 | 5 | 1.322057 |
| rs11667063     | ZNF600  | 19 | 57959318 | 7 | 0.523587 |
| rs11667063     | ZNF600  | 19 | 57959318 | 8 | 0.149125 |
| rs3194868      | ZNF28   | 19 | 57992529 | 1 | 0.21395  |
| rs3194868      | ZNF28   | 19 | 57992529 | 2 | 2.820515 |
| rs3194868      | ZNF28   | 19 | 57992529 | 4 | 0.400768 |
| rs10407516     | ZNF28   | 19 | 57994265 | 2 | 0.88416  |
| rs10407516     | ZNF28   | 19 | 57994265 | 4 | 0.556835 |
| rs10407516     | ZNF28   | 19 | 57994265 | 5 | 0.015525 |
| rs10407516     | ZNF28   | 19 | 57994265 | 1 | 0.447346 |
| rs10410012     | ZNF28   | 19 | 57994549 | 5 | 0.047058 |
| rs10410012     | ZNF28   | 19 | 57994549 | 1 | 1.279754 |
| rs10410012     | ZNF28   | 19 | 57994549 | 4 | 2.225582 |
| rs10417163     | ZNF28   | 19 | 57995517 | 4 | 0.290437 |

|            |           |    |          |   |          |
|------------|-----------|----|----------|---|----------|
| rs10417163 | ZNF28     | 19 | 57995517 | 7 | 0.029122 |
| rs10417163 | ZNF28     | 19 | 57995517 | 1 | 0.171771 |
| rs10417163 | ZNF28     | 19 | 57995517 | 6 | 0.77301  |
| rs10417163 | ZNF28     | 19 | 57995517 | 2 | 1.26237  |
| rs10417163 | ZNF28     | 19 | 57995517 | 3 | 0.445935 |
| rs1966574  | LOC729851 | 19 | 58059204 | 3 | 1.212264 |
| rs8109900  | ZNF321    | 19 | 58123806 | 3 | 0.285643 |
| rs8109900  | ZNF321    | 19 | 58123806 | 5 | 0.958588 |
| rs8109900  | ZNF321    | 19 | 58123806 | 1 | 3.374983 |
| rs12459008 | ZNF816A   | 19 | 58146601 | 5 | 2.200852 |
| rs3814     | ZNF415    | 19 | 58302999 | 4 | 0.447789 |
| rs3814     | ZNF415    | 19 | 58302999 | 6 | 10.81769 |
| rs3814     | ZNF415    | 19 | 58302999 | 1 | 0.01182  |
| rs1650972  | ZNF347    | 19 | 58335309 | 1 | 3.458845 |
| rs1133146  | ZNF665    | 19 | 58358472 | 4 | 0.976129 |
| rs1133146  | ZNF665    | 19 | 58358472 | 1 | 3.718549 |
| rs1133146  | ZNF665    | 19 | 58358472 | 6 | 0.964201 |
| rs1133146  | ZNF665    | 19 | 58358472 | 7 | 0.460039 |
| rs1133146  | ZNF665    | 19 | 58358472 | 5 | 1.122095 |
| rs1133145  | ZNF665    | 19 | 58358557 | 4 | 0.368939 |
| rs1133145  | ZNF665    | 19 | 58358557 | 7 | 0.280622 |
| rs1133145  | ZNF665    | 19 | 58358557 | 5 | 0.281638 |
| rs1133145  | ZNF665    | 19 | 58358557 | 1 | 3.428602 |
| rs1133145  | ZNF665    | 19 | 58358557 | 6 | 2.785313 |
| rs12971799 | ZNF665    | 19 | 58358938 | 5 | 1.278131 |
| rs12971799 | ZNF665    | 19 | 58358938 | 7 | 0.321733 |
| rs12971799 | ZNF665    | 19 | 58358938 | 1 | 3.279639 |
| rs12971799 | ZNF665    | 19 | 58358938 | 4 | 3.205613 |
| rs6509729  | ZNF665    | 19 | 58358996 | 2 | 2.948955 |
| rs12972121 | ZNF665    | 19 | 58359107 | 5 | 1.511019 |
| rs12985467 | ZNF665    | 19 | 58359169 | 1 | 0.752447 |
| rs12985467 | ZNF665    | 19 | 58359169 | 5 | 1.218304 |
| rs12985467 | ZNF665    | 19 | 58359169 | 4 | 0.444038 |
| rs12985467 | ZNF665    | 19 | 58359169 | 6 | 0.88722  |
| rs12459469 | ZNF665    | 19 | 58359725 | 7 | 0.109842 |
| rs12459469 | ZNF665    | 19 | 58359725 | 5 | 0.548402 |
| rs12459469 | ZNF665    | 19 | 58359725 | 4 | 3.029794 |
| rs12459469 | ZNF665    | 19 | 58359725 | 1 | 3.73002  |
| rs10409924 | ZNF665    | 19 | 58360361 | 6 | 0.163352 |
| rs10409924 | ZNF665    | 19 | 58360361 | 4 | 0.289201 |
| rs10409924 | ZNF665    | 19 | 58360361 | 5 | 4.06172  |
| rs10409924 | ZNF665    | 19 | 58360361 | 7 | 0.406743 |
| rs4801959  | ZNF665    | 19 | 58361085 | 2 | 1.728333 |
| rs10853858 | ZNF818    | 19 | 58408090 | 7 | 0.001903 |
| rs10853858 | ZNF818    | 19 | 58408090 | 3 | 7.608842 |
| rs6509740  | ZNF677    | 19 | 58430797 | 5 | 0.007819 |
| rs6509740  | ZNF677    | 19 | 58430797 | 3 | 1.338334 |

|                |           |    |          |   |          |
|----------------|-----------|----|----------|---|----------|
| rs6509740      | ZNF677    | 19 | 58430797 | 4 | 0.239213 |
| rs17272966     | ZNF677    | 19 | 58431770 | 4 | 0.486985 |
| rs17272966     | ZNF677    | 19 | 58431770 | 5 | 0.403887 |
| rs8113436      | ZNF677    | 19 | 58432634 | 5 | 0.414099 |
| rs8113436      | ZNF677    | 19 | 58432634 | 4 | 1.369771 |
| rs12984188     | ZNF677    | 19 | 58432880 | 5 | 0.451462 |
| rs12984188     | ZNF677    | 19 | 58432880 | 6 | 0.243854 |
| rs12984473     | ZNF677    | 19 | 58433000 | 5 | 0.843481 |
| rs12984473     | ZNF677    | 19 | 58433000 | 4 | 0.53326  |
| rs12609049     | VN1R2     | 19 | 58454349 | 5 | 1.077226 |
| rs8109165      | BIRC8     | 19 | 58484854 | 3 | 2.799807 |
| rs8109165      | BIRC8     | 19 | 58484854 | 5 | 3.254512 |
| rs6509753      | ZNF765    | 19 | 58605367 | 7 | 1.196333 |
| SNP19-58649938 | ZNF761    | 19 | 58649938 | 1 | 0.751618 |
| SNP19-58649938 | ZNF761    | 19 | 58649938 | 7 | 0.188965 |
| SNP19-58649938 | ZNF761    | 19 | 58649938 | 2 | 2.458566 |
| SNP19-58685873 | ZNF813    | 19 | 58685873 | 3 | 0.911071 |
| SNP19-58685873 | ZNF813    | 19 | 58685873 | 5 | 5.461034 |
| SNP19-58685873 | ZNF813    | 19 | 58685873 | 4 | 1.061138 |
| rs2708844      | ZNF813    | 19 | 58687503 | 2 | 1.758519 |
| rs2708844      | ZNF813    | 19 | 58687503 | 1 | 0.14091  |
| rs2708844      | ZNF813    | 19 | 58687503 | 6 | 1.205738 |
| rs2708840      | ZNF813    | 19 | 58688926 | 8 | 0.852081 |
| rs2708781      | NULL      | 19 | 58716026 | 5 | 1.628984 |
| rs8100247      | ZNF331    | 19 | 58717013 | 3 | 0.735317 |
| rs16984961     | NULL      | 19 | 58717090 | 3 | 0.530442 |
| rs16985052     | ZNF331    | 19 | 58772592 | 8 | 5.235749 |
| rs16985052     | ZNF331    | 19 | 58772592 | 2 | 3.066722 |
| rs8110538      | ZNF331    | 19 | 58773710 | 7 | 2.721639 |
| rs8110538      | ZNF331    | 19 | 58773710 | 5 | 3.008963 |
| rs8110538      | ZNF331    | 19 | 58773710 | 6 | 2.454326 |
| rs8110350      | ZNF331    | 19 | 58773727 | 5 | 2.531808 |
| rs8110350      | ZNF331    | 19 | 58773727 | 4 | 2.067732 |
| rs8110350      | ZNF331    | 19 | 58773727 | 8 | 3.439408 |
| rs8110350      | ZNF331    | 19 | 58773727 | 7 | 1.767841 |
| rs8110350      | ZNF331    | 19 | 58773727 | 6 | 1.75852  |
| rs8103787      | LOC646565 | 19 | 58853397 | 3 | 2.243139 |
| rs4806773      | NLRP12    | 19 | 59000366 | 6 | 1.405722 |
| rs4806773      | NLRP12    | 19 | 59000366 | 1 | 1.849509 |
| rs1657535      | OSCAR     | 19 | 59292044 | 1 | 3.242829 |
| rs11556769     | PRPF31    | 19 | 59319727 | 1 | 5.988585 |
| rs43211        | CNOT3     | 19 | 59344015 | 8 | 5.468177 |
| rs43211        | CNOT3     | 19 | 59344015 | 4 | 0.466018 |
| rs36657        | TMC4      | 19 | 59356021 | 6 | 0.219352 |
| rs36657        | TMC4      | 19 | 59356021 | 5 | 0.007368 |
| rs36657        | TMC4      | 19 | 59356021 | 1 | 5.747118 |
| rs36657        | TMC4      | 19 | 59356021 | 3 | 0.26625  |



|                |         |    |          |   |          |
|----------------|---------|----|----------|---|----------|
| rs36657        | TMC4    | 19 | 59356021 | 8 | 1.170316 |
| SNP19-59494505 | LILRA3  | 19 | 59494505 | 5 | 0.853449 |
| rs1035451      | LENG8   | 19 | 59654279 | 4 | 0.511863 |
| rs1035451      | LENG8   | 19 | 59654279 | 5 | 0.763202 |
| rs3813148      | LENG8   | 19 | 59657672 | 4 | 0.221417 |
| rs3813148      | LENG8   | 19 | 59657672 | 6 | 3.630923 |
| rs889147       | LENG8   | 19 | 59658391 | 5 | 0.056028 |
| rs889147       | LENG8   | 19 | 59658391 | 6 | 0.248637 |
| rs889147       | LENG8   | 19 | 59658391 | 4 | 4.656394 |
| rs10423424     | LENG9   | 19 | 59665092 | 6 | 0.863976 |
| rs10423424     | LENG9   | 19 | 59665092 | 4 | 0.902138 |
| rs10423424     | LENG9   | 19 | 59665092 | 5 | 6.164101 |
| rs10406453     | LENG9   | 19 | 59666130 | 6 | 3.028924 |
| rs10406453     | LENG9   | 19 | 59666130 | 5 | 1.107366 |
| rs10406453     | LENG9   | 19 | 59666130 | 4 | 1.375532 |
| rs1981829      | LENG9   | 19 | 59666586 | 4 | 1.011582 |
| rs1981829      | LENG9   | 19 | 59666586 | 5 | 0.880366 |
| rs1981829      | LENG9   | 19 | 59666586 | 6 | 4.158435 |
| SNP19-59938543 | KIR3DL3 | 19 | 59938543 | 1 | 0.075041 |
| rs269950       | NLRP7   | 19 | 60133714 | 3 | 0.225133 |
| rs2217659      | NLRP2   | 19 | 60177711 | 3 | 1.007319 |
| rs17699678     | NLRP2   | 19 | 60185540 | 8 | 6.456903 |
| rs11672113     | NLRP2   | 19 | 60186693 | 1 | 0.329922 |
| rs11672113     | NLRP2   | 19 | 60186693 | 5 | 2.99412  |
| rs11672113     | NLRP2   | 19 | 60186693 | 3 | 0.727127 |
| rs11672113     | NLRP2   | 19 | 60186693 | 2 | 1.205557 |
| rs12768        | NLRP2   | 19 | 60203949 | 4 | 2.191528 |
| rs12768        | NLRP2   | 19 | 60203949 | 5 | 0.269802 |
| rs12768        | NLRP2   | 19 | 60203949 | 2 | 3.410015 |
| rs12768        | NLRP2   | 19 | 60203949 | 3 | 1.528151 |
| rs12768        | NLRP2   | 19 | 60203949 | 6 | 0.514919 |
| rs1043673      | NLRP2   | 19 | 60204044 | 3 | 0.037221 |
| rs1043673      | NLRP2   | 19 | 60204044 | 1 | 1.011604 |
| rs1043680      | NLRP2   | 19 | 60204159 | 2 | 0.780941 |
| rs1043680      | NLRP2   | 19 | 60204159 | 1 | 0.614606 |
| rs1043680      | NLRP2   | 19 | 60204159 | 3 | 0.170175 |
| rs10417981     | GP6     | 19 | 60217200 | 6 | 0.302599 |
| rs1671150      | GP6     | 19 | 60217309 | 6 | 0.461477 |
| rs1671152      | GP6     | 19 | 60218157 | 6 | 1.624999 |
| rs1613662      | GP6     | 19 | 60228407 | 4 | 0.229304 |
| rs1613662      | GP6     | 19 | 60228407 | 7 | 1.053451 |
| rs1613662      | GP6     | 19 | 60228407 | 6 | 0.611944 |
| rs892090       | GP6     | 19 | 60230884 | 4 | 3.700679 |
| rs892090       | GP6     | 19 | 60230884 | 7 | 0.789444 |
| rs892090       | GP6     | 19 | 60230884 | 6 | 0.187915 |
| rs1189         | RDH13   | 19 | 60247966 | 3 | 0.020189 |
| rs1189         | RDH13   | 19 | 60247966 | 4 | 9.667239 |

|                |           |    |          |   |          |
|----------------|-----------|----|----------|---|----------|
| SNP19-60259896 | RDH13     | 19 | 60259896 | 5 | 0.285146 |
| rs2532060      | PPP1R12C  | 19 | 60306735 | 7 | 0.208034 |
| rs2532060      | PPP1R12C  | 19 | 60306735 | 3 | 0.438658 |
| rs2532060      | PPP1R12C  | 19 | 60306735 | 1 | 1.918342 |
| rs34521018     | PPP1R12C  | 19 | 60315925 | 5 | 0.392693 |
| rs34521018     | PPP1R12C  | 19 | 60315925 | 3 | 0.039568 |
| rs2365725      | C19orf51  | 19 | 60364282 | 8 | 1.775288 |
| rs17458        | PTPRH     | 19 | 60384827 | 6 | 3.481179 |
| rs2288420      | PTPRH     | 19 | 60384935 | 6 | 2.565983 |
| rs2288419      | PTPRH     | 19 | 60385056 | 6 | 1.295836 |
| rs2288419      | PTPRH     | 19 | 60385056 | 8 | 0.144276 |
| SNP19-60389091 | PTPRH     | 19 | 60389091 | 1 | 2.972436 |
| rs36092369     | PTPRH     | 19 | 60390767 | 6 | 2.031744 |
| rs2288523      | PTPRH     | 19 | 60394722 | 2 | 3.90228  |
| rs2288523      | PTPRH     | 19 | 60394722 | 6 | 0.966619 |
| rs2288521      | PTPRH     | 19 | 60400369 | 3 | 1.283417 |
| rs2288521      | PTPRH     | 19 | 60400369 | 4 | 2.475676 |
| rs2288521      | PTPRH     | 19 | 60400369 | 1 | 1.328473 |
| rs2288521      | PTPRH     | 19 | 60400369 | 2 | 2.424643 |
| rs2288521      | PTPRH     | 19 | 60400369 | 8 | 4.505081 |
| rs2288520      | PTPRH     | 19 | 60400385 | 1 | 5.596685 |
| SNP19-60407154 | PTPRH     | 19 | 60407154 | 6 | 1.968819 |
| rs3826884      | TMEM86B   | 19 | 60429993 | 1 | 5.647676 |
| rs4252574      | FAM71E2   | 19 | 60565454 | 3 | 1.254236 |
| rs4252574      | FAM71E2   | 19 | 60565454 | 5 | 0.664298 |
| rs1126760      | IL11      | 19 | 60567886 | 5 | 0.326652 |
| rs1126760      | IL11      | 19 | 60567886 | 3 | 1.202824 |
| rs2298885      | IL11      | 19 | 60568052 | 1 | 0.093135 |
| rs2298885      | IL11      | 19 | 60568052 | 7 | 0.669746 |
| rs2298885      | IL11      | 19 | 60568052 | 2 | 1.796706 |
| rs1042506      | IL11      | 19 | 60568923 | 5 | 0.549878 |
| rs1042506      | IL11      | 19 | 60568923 | 3 | 0.474832 |
| rs17700376     | RPL28     | 19 | 60589139 | 3 | 1.948237 |
| rs17700376     | RPL28     | 19 | 60589139 | 7 | 6.200469 |
| rs17700376     | RPL28     | 19 | 60589139 | 1 | 1.980397 |
| rs12981911     | RPL28     | 19 | 60592681 | 1 | 0.268865 |
| rs12981911     | RPL28     | 19 | 60592681 | 8 | 0.987571 |
| rs12981911     | RPL28     | 19 | 60592681 | 2 | 3.644321 |
| rs7255648      | RPL28     | 19 | 60593994 | 2 | 5.961499 |
| rs4075908      | LOC284296 | 19 | 60633639 | 3 | 0.350756 |
| rs4075908      | LOC284296 | 19 | 60633639 | 1 | 0.007838 |
| rs2303089      | ISOC2     | 19 | 60656532 | 2 | 3.623787 |
| SNP19-60690074 | NAT14     | 19 | 60690074 | 3 | 0.353313 |
| SNP19-60690074 | NAT14     | 19 | 60690074 | 6 | 0.944842 |
| rs7478         | NAT14     | 19 | 60690323 | 3 | 0.364049 |
| rs7478         | NAT14     | 19 | 60690323 | 2 | 4.727479 |
| rs7478         | NAT14     | 19 | 60690323 | 5 | 0.181423 |

|                |           |    |          |   |          |
|----------------|-----------|----|----------|---|----------|
| rs310475       | ZNF580    | 19 | 60845680 | 4 | 1.13527  |
| rs310475       | ZNF580    | 19 | 60845680 | 8 | 0.960595 |
| rs310475       | ZNF580    | 19 | 60845680 | 3 | 1.013356 |
| rs310475       | ZNF580    | 19 | 60845680 | 7 | 0.502054 |
| rs504850       | U2AF2     | 19 | 60857287 | 6 | 0.190782 |
| rs504850       | U2AF2     | 19 | 60857287 | 4 | 0.228736 |
| rs504850       | U2AF2     | 19 | 60857287 | 8 | 0.310764 |
| rs2616940      | NLRP11    | 19 | 60999395 | 4 | 1.15676  |
| rs2616940      | NLRP11    | 19 | 60999395 | 6 | 2.005423 |
| rs302456       | NLRP4     | 19 | 61084687 | 5 | 2.336237 |
| rs302456       | NLRP4     | 19 | 61084687 | 1 | 1.236257 |
| rs302456       | NLRP4     | 19 | 61084687 | 2 | 3.247917 |
| rs12975929     | NLRP4     | 19 | 61084732 | 6 | 2.726141 |
| rs12975929     | NLRP4     | 19 | 61084732 | 3 | 3.241313 |
| rs12975929     | NLRP4     | 19 | 61084732 | 5 | 2.47623  |
| rs306475       | NLRP8     | 19 | 61182590 | 7 | 0.320764 |
| rs306475       | NLRP8     | 19 | 61182590 | 5 | 1.651043 |
| rs306475       | NLRP8     | 19 | 61182590 | 1 | 1.202935 |
| rs397977       | NLRP5     | 19 | 61231052 | 4 | 0.427014 |
| rs397977       | NLRP5     | 19 | 61231052 | 5 | 0.908344 |
| rs397977       | NLRP5     | 19 | 61231052 | 3 | 0.624307 |
| rs16986899     | NLRP5     | 19 | 61241322 | 1 | 0.021871 |
| SNP19-61244268 | NLRP5     | 19 | 61244268 | 5 | 1.376915 |
| rs10409555     | NLRP5     | 19 | 61264644 | 1 | 1.389646 |
| rs575756       | GALP      | 19 | 61386317 | 6 | 2.021461 |
| SNP19-61395060 | LOC342933 | 19 | 61395060 | 1 | 4.648973 |
| SNP19-61395101 | LOC342933 | 19 | 61395101 | 7 | 4.937546 |
| SNP19-61395101 | LOC342933 | 19 | 61395101 | 6 | 4.171706 |
| SNP19-61395101 | LOC342933 | 19 | 61395101 | 4 | 4.646721 |
| SNP19-61395101 | LOC342933 | 19 | 61395101 | 1 | 5.413689 |
| SNP19-61395101 | LOC342933 | 19 | 61395101 | 3 | 4.863115 |
| SNP19-61395101 | LOC342933 | 19 | 61395101 | 8 | 4.772706 |
| SNP19-61395101 | LOC342933 | 19 | 61395101 | 5 | 4.054827 |
| rs12979551     | LOC649137 | 19 | 61411217 | 7 | 1.220872 |
| rs12979551     | LOC649137 | 19 | 61411217 | 1 | 0.467142 |
| rs12979551     | LOC649137 | 19 | 61411217 | 6 | 1.567186 |
| rs12979551     | LOC649137 | 19 | 61411217 | 2 | 2.640612 |
| rs12979551     | LOC649137 | 19 | 61411217 | 8 | 1.237833 |
| rs7245993      | LOC729999 | 19 | 61523320 | 6 | 1.191879 |
| rs7245993      | LOC729999 | 19 | 61523320 | 1 | 1.177936 |
| rs7245993      | LOC729999 | 19 | 61523320 | 3 | 1.277471 |
| rs11667052     | ZNF471    | 19 | 61727824 | 1 | 5.243985 |
| rs11667052     | ZNF471    | 19 | 61727824 | 4 | 0.945839 |
| rs3752176      | ZNF471    | 19 | 61728465 | 4 | 0.388928 |
| rs960997       | ZNF471    | 19 | 61731283 | 4 | 9.253086 |
| rs960997       | ZNF471    | 19 | 61731283 | 1 | 3.996247 |
| rs958338       | ZNF471    | 19 | 61731511 | 4 | 4.363411 |

|                |        |    |          |   |          |
|----------------|--------|----|----------|---|----------|
| rs7258886      | ZFP28  | 19 | 61759851 | 4 | 0.772107 |
| rs7258886      | ZFP28  | 19 | 61759851 | 6 | 1.239246 |
| rs7258886      | ZFP28  | 19 | 61759851 | 1 | 4.868027 |
| rs10421285     | ZNF470 | 19 | 61777581 | 6 | 2.392237 |
| rs10421285     | ZNF470 | 19 | 61777581 | 1 | 5.785161 |
| rs10421285     | ZNF470 | 19 | 61777581 | 4 | 1.103138 |
| rs1047063      | ZNF71  | 19 | 61826386 | 1 | 4.002004 |
| rs1047063      | ZNF71  | 19 | 61826386 | 4 | 3.212105 |
| rs2286751      | ZIM2   | 19 | 61985206 | 5 | 0.995007 |
| rs2286751      | ZIM2   | 19 | 61985206 | 1 | 1.259681 |
| rs2286751      | ZIM2   | 19 | 61985206 | 3 | 2.132367 |
| rs1055359      | PEG3   | 19 | 62016152 | 1 | 4.131757 |
| rs1055359      | PEG3   | 19 | 62016152 | 5 | 5.087465 |
| rs1055359      | PEG3   | 19 | 62016152 | 3 | 5.083118 |
| rs1860565      | PEG3   | 19 | 62026834 | 4 | 1.666382 |
| rs1860565      | PEG3   | 19 | 62026834 | 3 | 3.887909 |
| rs1860565      | PEG3   | 19 | 62026834 | 1 | 1.257605 |
| rs1027392      | USP29  | 19 | 62332958 | 5 | 1.146664 |
| rs3795003      | USP29  | 19 | 62333611 | 7 | 1.440893 |
| rs8103779      | USP29  | 19 | 62334863 | 5 | 4.571258 |
| rs8103793      | USP29  | 19 | 62334911 | 4 | 1.764347 |
| SNP19-62340089 | ZIM3   | 19 | 62340089 | 5 | 1.28642  |
| SNP19-62340089 | ZIM3   | 19 | 62340089 | 4 | 0.889033 |
| rs17305556     | ZIM3   | 19 | 62341713 | 7 | 1.518516 |
| rs11882189     | DUXA   | 19 | 62357085 | 1 | 1.992373 |
| rs11882189     | DUXA   | 19 | 62357085 | 4 | 0.603884 |
| rs11882189     | DUXA   | 19 | 62357085 | 5 | 0.837127 |
| rs8108591      | DUXA   | 19 | 62357562 | 5 | 7.230625 |
| SNP19-62414819 | ZNF264 | 19 | 62414819 | 7 | 0.683638 |
| SNP19-62414819 | ZNF264 | 19 | 62414819 | 1 | 6.788472 |
| SNP19-62414819 | ZNF264 | 19 | 62414819 | 4 | 0.475584 |
| SNP19-62414819 | ZNF264 | 19 | 62414819 | 6 | 0.057754 |
| rs10414299     | ZNF264 | 19 | 62416927 | 8 | 0.738257 |
| rs10414299     | ZNF264 | 19 | 62416927 | 1 | 5.023615 |
| rs2361129      | ZNF264 | 19 | 62421509 | 5 | 0.933762 |
| rs3746228      | ZNF460 | 19 | 62496174 | 4 | 5.272229 |
| rs6510057      | ZNF543 | 19 | 62529830 | 4 | 0.449771 |
| rs6510057      | ZNF543 | 19 | 62529830 | 7 | 0.529986 |
| rs6510057      | ZNF543 | 19 | 62529830 | 1 | 0.278342 |
| rs6510057      | ZNF543 | 19 | 62529830 | 5 | 0.088614 |
| rs6510057      | ZNF543 | 19 | 62529830 | 2 | 7.63814  |
| rs6510057      | ZNF543 | 19 | 62529830 | 8 | 7.9142   |
| rs6510057      | ZNF543 | 19 | 62529830 | 6 | 5.688195 |
| rs12460323     | ZNF548 | 19 | 62593073 | 8 | 0.529362 |
| rs12460323     | ZNF548 | 19 | 62593073 | 5 | 0.690408 |
| rs12460323     | ZNF548 | 19 | 62593073 | 3 | 0.939657 |
| rs12460323     | ZNF548 | 19 | 62593073 | 6 | 2.496862 |

|                |           |    |          |   |          |
|----------------|-----------|----|----------|---|----------|
| SNP19-62601639 | ZNF548    | 19 | 62601639 | 6 | 11.59512 |
| SNP19-62601639 | ZNF548    | 19 | 62601639 | 5 | 4.143778 |
| rs12974211     | ZNF17     | 19 | 62614525 | 5 | 3.266108 |
| rs12974211     | ZNF17     | 19 | 62614525 | 6 | 4.629242 |
| rs2240037      | ZNF749    | 19 | 62647531 | 8 | 5.412473 |
| rs4801488      | ZNF772    | 19 | 62672813 | 1 | 0.612434 |
| rs4801488      | ZNF772    | 19 | 62672813 | 6 | 0.072994 |
| rs2360765      | ZNF772    | 19 | 62674663 | 1 | 0.167877 |
| rs2360765      | ZNF772    | 19 | 62674663 | 6 | 0.088831 |
| rs2360764      | ZNF772    | 19 | 62674890 | 2 | 3.396312 |
| rs2360764      | ZNF772    | 19 | 62674890 | 1 | 0.888846 |
| rs2360764      | ZNF772    | 19 | 62674890 | 6 | 0.572301 |
| rs10426249     | ZNF772    | 19 | 62675606 | 6 | 3.656686 |
| rs10426249     | ZNF772    | 19 | 62675606 | 2 | 2.686067 |
| rs10426249     | ZNF772    | 19 | 62675606 | 1 | 0.185967 |
| rs10426255     | ZNF772    | 19 | 62675617 | 1 | 0.393617 |
| rs10426255     | ZNF772    | 19 | 62675617 | 2 | 0.197626 |
| rs10407734     | ZNF772    | 19 | 62675857 | 2 | 2.013382 |
| rs10407734     | ZNF772    | 19 | 62675857 | 1 | 0.076978 |
| rs2074059      | ZNF772    | 19 | 62677272 | 2 | 1.394778 |
| rs2074059      | ZNF772    | 19 | 62677272 | 1 | 0.407312 |
| rs2074059      | ZNF772    | 19 | 62677272 | 6 | 6.459862 |
| rs2074060      | ZNF772    | 19 | 62677378 | 2 | 4.076304 |
| rs2074060      | ZNF772    | 19 | 62677378 | 6 | 2.087268 |
| rs2074060      | ZNF772    | 19 | 62677378 | 1 | 0.239428 |
| rs12463137     | ZNF773    | 19 | 62703233 | 6 | 0.444449 |
| rs12463137     | ZNF773    | 19 | 62703233 | 4 | 0.816591 |
| rs2885007      | ZNF134    | 19 | 62826084 | 1 | 4.254962 |
| rs11879465     | ZNF211    | 19 | 62844607 | 1 | 1.868337 |
| rs3746215      | ZNF211    | 19 | 62845408 | 1 | 5.400128 |
| rs12618        | ZNF211    | 19 | 62845568 | 1 | 5.339385 |
| rs9676604      | ZSCAN4    | 19 | 62881099 | 1 | 1.722192 |
| rs2188736      | ZNF154    | 19 | 62905585 | 6 | 1.67155  |
| rs2188736      | ZNF154    | 19 | 62905585 | 1 | 4.471473 |
| rs13037        | ZNF776    | 19 | 62960985 | 4 | 0.227183 |
| rs13037        | ZNF776    | 19 | 62960985 | 5 | 0.044854 |
| rs13037        | ZNF776    | 19 | 62960985 | 2 | 4.221986 |
| rs13037        | ZNF776    | 19 | 62960985 | 7 | 1.597051 |
| rs13037        | ZNF776    | 19 | 62960985 | 1 | 0.119894 |
| rs12609890     | ZNF587    | 19 | 63064422 | 8 | 0.924902 |
| rs12609890     | ZNF587    | 19 | 63064422 | 3 | 0.578674 |
| rs7253514      | ZNF418    | 19 | 63131118 | 3 | 1.127438 |
| rs7253514      | ZNF418    | 19 | 63131118 | 8 | 0.459146 |
| rs7247254      | LOC646820 | 19 | 63156396 | 3 | 1.411578 |
| rs7247254      | LOC646820 | 19 | 63156396 | 5 | 2.208987 |
| rs7247254      | LOC646820 | 19 | 63156396 | 4 | 2.805755 |
| rs7247254      | LOC646820 | 19 | 63156396 | 8 | 0.110595 |

|                |           |    |          |   |          |
|----------------|-----------|----|----------|---|----------|
| rs257662       | LOC646820 | 19 | 63156441 | 8 | 2.63343  |
| rs257662       | LOC646820 | 19 | 63156441 | 3 | 0.281865 |
| rs257662       | LOC646820 | 19 | 63156441 | 7 | 0.164679 |
| rs257663       | LOC646820 | 19 | 63156742 | 5 | 0.08703  |
| rs257663       | LOC646820 | 19 | 63156742 | 7 | 0.026681 |
| rs7249794      | C19orf18  | 19 | 63177640 | 3 | 1.296321 |
| rs9304809      | ZNF606    | 19 | 63206287 | 3 | 0.449654 |
| rs9304809      | ZNF606    | 19 | 63206287 | 8 | 0.989849 |
| rs8104122      | ZSCAN1    | 19 | 63257243 | 1 | 1.206207 |
| rs2288274      | ZNF135    | 19 | 63264771 | 7 | 2.528771 |
| rs10421350     | ZSCAN18   | 19 | 63301255 | 5 | 1.143128 |
| rs10420801     | ZSCAN18   | 19 | 63301269 | 5 | 0.217583 |
| rs2547360      | ZNF329    | 19 | 63330211 | 3 | 0.571448 |
| rs11666156     | ZNF8      | 19 | 63482171 | 3 | 0.597677 |
| rs11666156     | ZNF8      | 19 | 63482171 | 7 | 0.80762  |
| rs11666156     | ZNF8      | 19 | 63482171 | 5 | 0.097572 |
| rs1265956      | A1BG      | 19 | 63548943 | 3 | 1.12326  |
| rs893184       | A1BG      | 19 | 63556291 | 3 | 1.580968 |
| rs2241787      | RPS5      | 19 | 63597975 | 3 | 0.568294 |
| rs2241787      | RPS5      | 19 | 63597975 | 4 | 0.028512 |
| rs2241787      | RPS5      | 19 | 63597975 | 6 | 3.504141 |
| rs2241787      | RPS5      | 19 | 63597975 | 7 | 0.496968 |
| SNP19-63620121 | ZNF584    | 19 | 63620121 | 4 | 0.061003 |
| SNP19-63620121 | ZNF584    | 19 | 63620121 | 7 | 4.867968 |
| rs3764532      | ZNF584    | 19 | 63621034 | 4 | 0.256331 |
| rs3764531      | ZNF584    | 19 | 63621117 | 1 | 5.708968 |
| rs3764531      | ZNF584    | 19 | 63621117 | 3 | 0.144911 |
| SNP19-63660991 | ZNF324B   | 19 | 63660991 | 3 | 1.422211 |
| SNP19-63660991 | ZNF324B   | 19 | 63660991 | 5 | 2.438839 |
| SNP19-63660991 | ZNF324B   | 19 | 63660991 | 6 | 0.578836 |
| SNP19-63660991 | ZNF324B   | 19 | 63660991 | 8 | 1.335531 |
| SNP19-63660991 | ZNF324B   | 19 | 63660991 | 4 | 0.217747 |
| SNP19-63660991 | ZNF324B   | 19 | 63660991 | 1 | 5.817794 |
| rs4801595      | ZNF324    | 19 | 63670329 | 5 | 0.750928 |
| rs4801595      | ZNF324    | 19 | 63670329 | 6 | 0.378754 |
| rs4801595      | ZNF324    | 19 | 63670329 | 1 | 2.84279  |
| rs4801595      | ZNF324    | 19 | 63670329 | 3 | 0.767902 |
| rs4801595      | ZNF324    | 19 | 63670329 | 8 | 0.309147 |
| rs35350976     | SLC27A5   | 19 | 63714986 | 1 | 0.468775 |
| rs35350976     | SLC27A5   | 19 | 63714986 | 4 | 0.666532 |
| rs4756         | MZF1      | 19 | 63766465 | 4 | 0.426275 |
| rs4756         | MZF1      | 19 | 63766465 | 1 | 4.078117 |
| rs3752109      | MZF1      | 19 | 63774417 | 1 | 1.905951 |
| rs3752109      | MZF1      | 19 | 63774417 | 8 | 0.817872 |
| rs3752109      | MZF1      | 19 | 63774417 | 5 | 0.073291 |
| rs3752109      | MZF1      | 19 | 63774417 | 3 | 0.622181 |
| rs3827147      | C20orf96  | 20 | 204727   | 5 | 0.124821 |

|              |         |    |         |   |          |
|--------------|---------|----|---------|---|----------|
| rs3827147    | C2orf96 | 20 | 204727  | 3 | 0.187009 |
| rs3827147    | C2orf96 | 20 | 204727  | 2 | 4.96227  |
| rs7271033    | C2orf96 | 20 | 207969  | 3 | 0.212187 |
| rs7271033    | C2orf96 | 20 | 207969  | 4 | 5.592106 |
| rs7271033    | C2orf96 | 20 | 207969  | 5 | 6.869672 |
| rs7271033    | C2orf96 | 20 | 207969  | 2 | 0.094736 |
| rs7271033    | C2orf96 | 20 | 207969  | 1 | 0.276487 |
| rs1057189    | ZCCHC3  | 20 | 226806  | 3 | 0.899548 |
| rs6050213    | SOX12   | 20 | 256878  | 3 | 0.498338 |
| rs6050344    | SOX12   | 20 | 258493  | 3 | 0.504239 |
| rs6050344    | SOX12   | 20 | 258493  | 6 | 4.824365 |
| rs1001549    | NRSN2   | 20 | 283225  | 3 | 0.726776 |
| rs1001549    | NRSN2   | 20 | 283225  | 7 | 5.662362 |
| rs6695       | TBC1D20 | 20 | 364149  | 1 | 2.968059 |
| rs6116997    | SCRT2   | 20 | 591677  | 3 | 0.827528 |
| SNP20-692382 | C2orf54 | 20 | 692382  | 8 | 0.757633 |
| SNP20-692382 | C2orf54 | 20 | 692382  | 3 | 0.708861 |
| rs2282050    | FAM110A | 20 | 774492  | 8 | 4.936883 |
| rs2282050    | FAM110A | 20 | 774492  | 7 | 0.774983 |
| rs2282050    | FAM110A | 20 | 774492  | 1 | 6.597691 |
| rs2282050    | FAM110A | 20 | 774492  | 6 | 0.002967 |
| rs11907018   | ANGPT4  | 20 | 801502  | 1 | 0.469406 |
| rs944110     | ANGPT4  | 20 | 802940  | 5 | 1.424048 |
| rs944110     | ANGPT4  | 20 | 802940  | 3 | 0.884962 |
| rs734940     | RSPO4   | 20 | 887596  | 6 | 0.824542 |
| rs734940     | RSPO4   | 20 | 887596  | 4 | 0.258671 |
| rs734940     | RSPO4   | 20 | 887596  | 5 | 0.376119 |
| rs1803415    | PSMF1   | 20 | 1047523 | 2 | 4.554862 |
| rs3795139    | SNPH    | 20 | 1233933 | 3 | 1.140147 |
| rs3795139    | SNPH    | 20 | 1233933 | 4 | 0.464467 |
| rs3795139    | SNPH    | 20 | 1233933 | 7 | 1.185253 |
| rs3795139    | SNPH    | 20 | 1233933 | 1 | 4.332849 |
| rs3764714    | SNPH    | 20 | 1235105 | 3 | 0.800225 |
| rs6134520    | SNPH    | 20 | 1236223 | 5 | 4.729269 |
| rs6134520    | SNPH    | 20 | 1236223 | 4 | 1.727458 |
| rs6134520    | SNPH    | 20 | 1236223 | 8 | 3.595765 |
| rs6134520    | SNPH    | 20 | 1236223 | 6 | 0.407885 |
| rs3210915    | NSFL1C  | 20 | 1371533 | 7 | 6.128446 |
| rs3210915    | NSFL1C  | 20 | 1371533 | 3 | 0.035405 |
| rs3210915    | NSFL1C  | 20 | 1371533 | 5 | 0.130068 |
| rs3210915    | NSFL1C  | 20 | 1371533 | 6 | 0.709229 |
| rs3210915    | NSFL1C  | 20 | 1371533 | 4 | 0.208034 |
| rs6135033    | NSFL1C  | 20 | 1396366 | 7 | 0.681533 |
| rs6135033    | NSFL1C  | 20 | 1396366 | 2 | 4.076162 |
| rs6135033    | NSFL1C  | 20 | 1396366 | 5 | 0.712429 |
| rs6042507    | SIRPB2  | 20 | 1407060 | 5 | 1.277361 |
| rs2253693    | SIRPB1  | 20 | 1493468 | 2 | 3.909791 |

|               |           |    |         |   |          |
|---------------|-----------|----|---------|---|----------|
| rs2253693     | SIRPB1    | 20 | 1493468 | 4 | 0.82005  |
| rs2253693     | SIRPB1    | 20 | 1493468 | 5 | 1.340649 |
| rs2253693     | SIRPB1    | 20 | 1493468 | 7 | 5.90221  |
| rs1048055     | SIRPG     | 20 | 1558062 | 7 | 8.155765 |
| rs1048055     | SIRPG     | 20 | 1558062 | 4 | 2.336915 |
| rs2281807     | SIRPG     | 20 | 1558201 | 7 | 1.134813 |
| rs2281807     | SIRPG     | 20 | 1558201 | 1 | 6.031602 |
| rs3746721     | SIRPG     | 20 | 1558894 | 4 | 0.374063 |
| rs3746721     | SIRPG     | 20 | 1558894 | 5 | 0.747843 |
| rs3746721     | SIRPG     | 20 | 1558894 | 8 | 0.032669 |
| rs3746722     | SIRPG     | 20 | 1558939 | 7 | 2.514822 |
| SNP20-1564137 | SIRPG     | 20 | 1564137 | 7 | 0.265972 |
| SNP20-1564137 | SIRPG     | 20 | 1564137 | 1 | 2.787827 |
| SNP20-1564137 | SIRPG     | 20 | 1564137 | 4 | 1.215878 |
| rs2273329     | LOC441938 | 20 | 1626188 | 4 | 0.439182 |
| rs2273329     | LOC441938 | 20 | 1626188 | 8 | 0.469854 |
| rs2273329     | LOC441938 | 20 | 1626188 | 7 | 0.054642 |
| rs2273329     | LOC441938 | 20 | 1626188 | 5 | 1.235828 |
| rs513201      | LOC441938 | 20 | 1636844 | 3 | 1.028713 |
| rs2185675     | STK35     | 20 | 2074180 | 1 | 5.751109 |
| rs2185675     | STK35     | 20 | 2074180 | 8 | 0.058009 |
| rs2185675     | STK35     | 20 | 2074180 | 5 | 0.153912 |
| rs214803      | TGM3      | 20 | 2238333 | 4 | 3.683647 |
| rs214803      | TGM3      | 20 | 2238333 | 8 | 3.676283 |
| rs214803      | TGM3      | 20 | 2238333 | 7 | 2.648061 |
| rs214831      | TGM3      | 20 | 2269363 | 3 | 2.450643 |
| rs214831      | TGM3      | 20 | 2269363 | 5 | 2.585414 |
| rs214832      | TGM3      | 20 | 2269665 | 3 | 0.839747 |
| rs214832      | TGM3      | 20 | 2269665 | 5 | 0.028837 |
| rs214832      | TGM3      | 20 | 2269665 | 4 | 0.66268  |
| rs1543385     | ZNF343    | 20 | 2410905 | 6 | 7.701491 |
| rs1543385     | ZNF343    | 20 | 2410905 | 1 | 3.180659 |
| rs6114607     | ZNF343    | 20 | 2429311 | 1 | 4.583082 |
| rs6138281     | ZNF343    | 20 | 2437531 | 3 | 0.32052  |
| rs6138281     | ZNF343    | 20 | 2437531 | 1 | 4.958459 |
| rs2422812     | TMC2      | 20 | 2570390 | 4 | 0.050536 |
| rs2273137     | NOL5A     | 20 | 2583212 | 4 | 0.229872 |
| rs6051545     | GNRH2     | 20 | 2973107 | 3 | 0.78573  |
| rs1078152     | LOC642991 | 20 | 3022040 | 1 | 0.442505 |
| rs913555      | UBOX5     | 20 | 3038124 | 3 | 0.526845 |
| rs913555      | UBOX5     | 20 | 3038124 | 7 | 0.026573 |
| rs913555      | UBOX5     | 20 | 3038124 | 5 | 0.396477 |
| rs913555      | UBOX5     | 20 | 3038124 | 8 | 0.794405 |
| rs34205880    | UBOX5     | 20 | 3038942 | 7 | 2.283288 |
| rs34205880    | UBOX5     | 20 | 3038942 | 6 | 0.57674  |
| rs34205880    | UBOX5     | 20 | 3038942 | 4 | 0.886542 |
| rs8362        | ITPA      | 20 | 3141978 | 5 | 6.413624 |



|               |         |    |         |   |          |
|---------------|---------|----|---------|---|----------|
| rs8362        | ITPA    | 20 | 3141978 | 6 | 6.982891 |
| rs8362        | ITPA    | 20 | 3141978 | 3 | 0.869701 |
| rs8362        | ITPA    | 20 | 3141978 | 1 | 5.302103 |
| rs17784288    | ATRN    | 20 | 3577843 | 2 | 4.589432 |
| rs641362      | ATRN    | 20 | 3578563 | 3 | 0.158993 |
| rs641362      | ATRN    | 20 | 3578563 | 8 | 2.531967 |
| SNP20-3598234 | ADAM33  | 20 | 3598234 | 7 | 1.20122  |
| SNP20-3598234 | ADAM33  | 20 | 3598234 | 1 | 1.58531  |
| SNP20-3598234 | ADAM33  | 20 | 3598234 | 4 | 1.775227 |
| rs673114      | SIGLEC1 | 20 | 3625736 | 3 | 1.190097 |
| rs611847      | SIGLEC1 | 20 | 3632022 | 1 | 0.940451 |
| rs625372      | SIGLEC1 | 20 | 3632729 | 3 | 0.917519 |
| SNP20-3634436 | SIGLEC1 | 20 | 3634436 | 3 | 1.583576 |
| SNP20-3634436 | SIGLEC1 | 20 | 3634436 | 1 | 1.623031 |
| rs3088007     | HSPA12B | 20 | 3681487 | 3 | 0.44106  |
| rs3088007     | HSPA12B | 20 | 3681487 | 4 | 0.464445 |
| rs2281479     | SPEF1   | 20 | 3710095 | 7 | 0.073176 |
| rs2281479     | SPEF1   | 20 | 3710095 | 5 | 0.124663 |
| rs8156        | CDC25B  | 20 | 3734637 | 1 | 3.433869 |
| rs8156        | CDC25B  | 20 | 3734637 | 8 | 1.461338 |
| rs8156        | CDC25B  | 20 | 3734637 | 5 | 0.015956 |
| rs17857295    | VISA    | 20 | 3786441 | 3 | 0.080246 |
| SNP20-3792929 | VISA    | 20 | 3792929 | 5 | 1.036414 |
| SNP20-3792929 | VISA    | 20 | 3792929 | 1 | 5.068538 |
| SNP20-3792929 | VISA    | 20 | 3792929 | 4 | 6.392965 |
| SNP20-3794397 | VISA    | 20 | 3794397 | 8 | 7.576424 |
| SNP20-3794397 | VISA    | 20 | 3794397 | 7 | 0.232069 |
| rs1741327     | SMOX    | 20 | 4112283 | 1 | 0.752183 |
| rs1741327     | SMOX    | 20 | 4112283 | 6 | 0.491632 |
| rs1741327     | SMOX    | 20 | 4112283 | 2 | 0.803904 |
| rs1741327     | SMOX    | 20 | 4112283 | 4 | 0.825591 |
| rs1741327     | SMOX    | 20 | 4112283 | 7 | 0.111126 |
| rs709024      | ADRA1D  | 20 | 4149984 | 7 | 0.821113 |
| rs709024      | ADRA1D  | 20 | 4149984 | 1 | 0.455985 |
| rs709024      | ADRA1D  | 20 | 4149984 | 8 | 0.593953 |
| rs709024      | ADRA1D  | 20 | 4149984 | 5 | 0.275827 |
| rs2236554     | ADRA1D  | 20 | 4150041 | 7 | 0.302625 |
| SNP20-4629310 | PRNP    | 20 | 4629310 | 5 | 0.76042  |
| rs2245220     | PRND    | 20 | 4653718 | 1 | 0.451108 |
| rs2245220     | PRND    | 20 | 4653718 | 3 | 1.181163 |
| rs2735675     | PRND    | 20 | 4655388 | 5 | 0.634121 |
| rs2735675     | PRND    | 20 | 4655388 | 1 | 0.02357  |
| rs3746673     | RASSF2  | 20 | 4710577 | 5 | 1.361302 |
| rs2422973     | RASSF2  | 20 | 4710701 | 8 | 0.728167 |
| rs2422974     | RASSF2  | 20 | 4710736 | 7 | 0.057754 |
| rs2422974     | RASSF2  | 20 | 4710736 | 8 | 0.69112  |
| rs2422974     | RASSF2  | 20 | 4710736 | 4 | 0.925658 |

|               |           |    |         |   |          |
|---------------|-----------|----|---------|---|----------|
| rs2422977     | RASSF2    | 20 | 4711093 | 1 | 1.735282 |
| rs6116508     | RASSF2    | 20 | 4711299 | 1 | 0.261554 |
| rs6139551     | RASSF2    | 20 | 4711438 | 1 | 1.951492 |
| rs3803969     | RASSF2    | 20 | 4711904 | 1 | 2.251595 |
| rs3746674     | RASSF2    | 20 | 4712629 | 5 | 0.440091 |
| rs3746674     | RASSF2    | 20 | 4712629 | 2 | 1.603897 |
| rs2422979     | RASSF2    | 20 | 4712682 | 1 | 0.03088  |
| rs2422979     | RASSF2    | 20 | 4712682 | 5 | 1.043183 |
| rs3746684     | PROKR2    | 20 | 5231376 | 8 | 2.234967 |
| rs4544519     | FLJ33544  | 20 | 5245172 | 7 | 0.114251 |
| rs4315595     | FLJ33544  | 20 | 5245193 | 7 | 0.391832 |
| rs4316997     | FLJ33544  | 20 | 5245859 | 5 | 0.087954 |
| rs4316997     | FLJ33544  | 20 | 5245859 | 7 | 0.886125 |
| rs4281978     | FLJ33544  | 20 | 5245984 | 7 | 1.074434 |
| rs6085189     | LOC728329 | 20 | 5436644 | 3 | 0.82206  |
| SNP20-5851067 | CHGB      | 20 | 5851067 | 2 | 3.872717 |
| SNP20-5851067 | CHGB      | 20 | 5851067 | 1 | 3.930453 |
| SNP20-5851067 | CHGB      | 20 | 5851067 | 8 | 4.025432 |
| rs236150      | CHGB      | 20 | 5851141 | 8 | 1.555103 |
| rs910122      | CHGB      | 20 | 5851323 | 7 | 0.386783 |
| rs910122      | CHGB      | 20 | 5851323 | 1 | 1.225202 |
| rs910122      | CHGB      | 20 | 5851323 | 8 | 0.902648 |
| SNP20-5851388 | CHGB      | 20 | 5851388 | 4 | 0.479586 |
| SNP20-5851388 | CHGB      | 20 | 5851388 | 7 | 2.23485  |
| rs236151      | CHGB      | 20 | 5851517 | 4 | 0.434117 |
| rs236151      | CHGB      | 20 | 5851517 | 5 | 0.377972 |
| rs236151      | CHGB      | 20 | 5851517 | 1 | 4.147918 |
| rs236152      | CHGB      | 20 | 5851848 | 1 | 0.66501  |
| rs236152      | CHGB      | 20 | 5851848 | 4 | 1.178965 |
| rs236152      | CHGB      | 20 | 5851848 | 7 | 0.596095 |
| rs236153      | CHGB      | 20 | 5851894 | 1 | 0.244379 |
| rs236153      | CHGB      | 20 | 5851894 | 2 | 0.621314 |
| rs236153      | CHGB      | 20 | 5851894 | 7 | 0.954723 |
| rs236153      | CHGB      | 20 | 5851894 | 4 | 0.598799 |
| rs742710      | CHGB      | 20 | 5852028 | 4 | 0.778389 |
| rs742710      | CHGB      | 20 | 5852028 | 7 | 0.127532 |
| rs742711      | CHGB      | 20 | 5852040 | 1 | 1.863045 |
| rs742711      | CHGB      | 20 | 5852040 | 2 | 0.990135 |
| rs742711      | CHGB      | 20 | 5852040 | 8 | 0.096184 |
| rs2821        | CHGB      | 20 | 5853779 | 7 | 1.421103 |
| rs2821        | CHGB      | 20 | 5853779 | 5 | 1.121217 |
| rs236156      | CHGB      | 20 | 5853972 | 8 | 0.815765 |
| rs1059391     | FERMT1    | 20 | 6004356 | 2 | 5.736988 |
| rs1059391     | FERMT1    | 20 | 6004356 | 6 | 0.939674 |
| rs753927      | FERMT1    | 20 | 6012710 | 3 | 1.170185 |
| rs35413391    | FERMT1    | 20 | 6017723 | 3 | 1.45677  |
| rs35413391    | FERMT1    | 20 | 6017723 | 5 | 0.545355 |

|                |           |    |          |   |          |
|----------------|-----------|----|----------|---|----------|
| rs35413391     | FERMT1    | 20 | 6017723  | 6 | 1.406669 |
| SNP20-6036265  | FERMT1    | 20 | 6036265  | 5 | 0.002427 |
| rs1056141      | FERMT1    | 20 | 6044632  | 5 | 0.453122 |
| rs2021349      | LOC643503 | 20 | 6129948  | 5 | 0.426376 |
| rs2076016      | TXNDC13   | 20 | 7910707  | 7 | 4.673167 |
| rs1012891      | TXNDC13   | 20 | 7928390  | 6 | 4.730473 |
| rs1012891      | TXNDC13   | 20 | 7928390  | 4 | 0.305258 |
| rs1012891      | TXNDC13   | 20 | 7928390  | 1 | 2.715898 |
| rs2205783      | TXNDC13   | 20 | 7948386  | 1 | 0.107862 |
| rs2205783      | TXNDC13   | 20 | 7948386  | 5 | 1.001352 |
| rs2205783      | TXNDC13   | 20 | 7948386  | 6 | 3.259126 |
| rs2205783      | TXNDC13   | 20 | 7948386  | 7 | 1.570344 |
| rs2205783      | TXNDC13   | 20 | 7948386  | 4 | 0.258706 |
| rs6077510      | PLCB4     | 20 | 9236522  | 3 | 1.261262 |
| rs2232257      | C20orf103 | 20 | 9443297  | 5 | 0.759697 |
| rs12151948     | C20orf103 | 20 | 9443379  | 3 | 0.409268 |
| rs10485732     | PAK7      | 20 | 9467529  | 1 | 1.939452 |
| rs2297345      | PAK7      | 20 | 9491622  | 2 | 3.245039 |
| rs2297345      | PAK7      | 20 | 9491622  | 8 | 5.389122 |
| rs6133723      | PAK7      | 20 | 9494554  | 8 | 0.807316 |
| rs2423432      | PAK7      | 20 | 9640033  | 7 | 1.071302 |
| rs652633       | ANKRD5    | 20 | 9978188  | 3 | 0.175122 |
| SNP20-9978452  | ANKRD5    | 20 | 9978452  | 3 | 0.012244 |
| rs6087119      | ANKRD5    | 20 | 9984202  | 1 | 3.954748 |
| rs3746544      | SNAP25    | 20 | 10235084 | 6 | 0.601445 |
| rs3746544      | SNAP25    | 20 | 10235084 | 1 | 0.620158 |
| rs3746544      | SNAP25    | 20 | 10235084 | 4 | 0.23778  |
| rs1545         | MKKS      | 20 | 10334013 | 6 | 1.787671 |
| rs1547         | MKKS      | 20 | 10334059 | 6 | 3.159005 |
| rs3178014      | JAG1      | 20 | 10581237 | 6 | 0.377001 |
| rs3178014      | JAG1      | 20 | 10581237 | 7 | 1.298832 |
| rs3178014      | JAG1      | 20 | 10581237 | 4 | 0.962737 |
| rs3178014      | JAG1      | 20 | 10581237 | 2 | 2.752281 |
| rs3178014      | JAG1      | 20 | 10581237 | 8 | 4.504547 |
| rs6134404      | BTBD3     | 20 | 11854553 | 1 | 4.949273 |
| SNP20-13199388 | C20orf82  | 20 | 13199388 | 2 | 3.807628 |
| rs3180370      | ESF1      | 20 | 13695441 | 3 | 0.28364  |
| rs6042360      | ESF1      | 20 | 13713507 | 7 | 3.380258 |
| rs199306       | MACROD2   | 20 | 15125520 | 1 | 0.480572 |
| rs199307       | MACROD2   | 20 | 15125580 | 1 | 1.485706 |
| rs199308       | MACROD2   | 20 | 15125625 | 1 | 0.246508 |
| rs932501       | LOC613266 | 20 | 15822325 | 3 | 0.481722 |
| SNP20-15915390 | MACROD2   | 20 | 15915390 | 8 | 5.330279 |
| SNP20-15915390 | MACROD2   | 20 | 15915390 | 3 | 0.442629 |
| SNP20-15915390 | MACROD2   | 20 | 15915390 | 1 | 5.896808 |
| rs6135656      | MACROD2   | 20 | 15979257 | 3 | 0.853008 |
| rs1225891      | MACROD2   | 20 | 15981185 | 3 | 0.903764 |

|                |          |    |          |   |          |
|----------------|----------|----|----------|---|----------|
| rs1225891      | MACROD2  | 20 | 15981185 | 1 | 0.095844 |
| rs1225891      | MACROD2  | 20 | 15981185 | 2 | 5.793706 |
| rs4814510      | C20orf23 | 20 | 16502067 | 3 | 1.817581 |
| rs6136118      | BFSP1    | 20 | 17423217 | 7 | 0.434862 |
| rs6136118      | BFSP1    | 20 | 17423217 | 3 | 0.37334  |
| rs2273448      | SNX5     | 20 | 17880210 | 6 | 0.72558  |
| rs2273448      | SNX5     | 20 | 17880210 | 3 | 0.364376 |
| rs2273448      | SNX5     | 20 | 17880210 | 8 | 0.487394 |
| rs2273448      | SNX5     | 20 | 17880210 | 4 | 0.788855 |
| rs910902       | SNX5     | 20 | 17897452 | 8 | 0.253322 |
| rs910902       | SNX5     | 20 | 17897452 | 3 | 0.320826 |
| rs910902       | SNX5     | 20 | 17897452 | 4 | 0.206951 |
| rs6111803      | OVOL2    | 20 | 17970362 | 8 | 5.081814 |
| rs34326039     | CSRP2BP  | 20 | 18110481 | 6 | 0.156293 |
| SNP20-18243730 | ZNF133   | 20 | 18243730 | 5 | 0.29169  |
| rs2228274      | ZNF133   | 20 | 18243861 | 4 | 0.130009 |
| rs1050475      | ZNF133   | 20 | 18244473 | 4 | 1.332852 |
| rs6075337      | C20orf12 | 20 | 18341312 | 6 | 4.227264 |
| rs6075337      | C20orf12 | 20 | 18341312 | 7 | 0.167971 |
| rs6075337      | C20orf12 | 20 | 18341312 | 1 | 5.544208 |
| rs6075337      | C20orf12 | 20 | 18341312 | 5 | 0.374824 |
| rs6035037      | C20orf12 | 20 | 18343988 | 3 | 0.288349 |
| rs6035037      | C20orf12 | 20 | 18343988 | 5 | 0.020382 |
| rs6035042      | C20orf12 | 20 | 18362356 | 5 | 0.593972 |
| rs6035042      | C20orf12 | 20 | 18362356 | 6 | 5.541393 |
| rs6035042      | C20orf12 | 20 | 18362356 | 7 | 3.984443 |
| rs4813333      | SEC23B   | 20 | 18436399 | 5 | 5.320318 |
| rs1053839      | C20orf79 | 20 | 18742754 | 4 | 3.665793 |
| rs1569767      | SLC24A3  | 20 | 19209623 | 7 | 0.048919 |
| rs1569767      | SLC24A3  | 20 | 19209623 | 5 | 0.098879 |
| rs17293432     | SLC24A3  | 20 | 19513671 | 2 | 4.524777 |
| rs2277866      | SLC24A3  | 20 | 19649943 | 8 | 3.11116  |
| rs6046271      | SLC24A3  | 20 | 19650171 | 4 | 1.120736 |
| rs6046271      | SLC24A3  | 20 | 19650171 | 1 | 4.876435 |
| rs6046271      | SLC24A3  | 20 | 19650171 | 3 | 1.029881 |
| rs16981035     | SLC24A3  | 20 | 19650513 | 1 | 4.894589 |
| rs16981035     | SLC24A3  | 20 | 19650513 | 3 | 1.230409 |
| rs16981035     | SLC24A3  | 20 | 19650513 | 4 | 6.670208 |
| rs3748484      | SLC24A3  | 20 | 19650694 | 8 | 0.899046 |
| rs2255255      | CRNKL1   | 20 | 19980998 | 1 | 4.881626 |
| rs2255255      | CRNKL1   | 20 | 19980998 | 8 | 0.700404 |
| rs2255255      | CRNKL1   | 20 | 19980998 | 4 | 7.735797 |
| rs6075614      | C20orf26 | 20 | 20027360 | 3 | 1.108037 |
| rs6081901      | C20orf26 | 20 | 20092772 | 7 | 1.339424 |
| rs6081901      | C20orf26 | 20 | 20092772 | 4 | 1.979208 |
| rs6075630      | C20orf26 | 20 | 20098027 | 6 | 0.622305 |
| rs6075630      | C20orf26 | 20 | 20098027 | 3 | 0.524957 |

|                |              |    |          |   |          |
|----------------|--------------|----|----------|---|----------|
| rs2424317      | C20orf26     | 20 | 20205958 | 3 | 0.831071 |
| rs4815025      | C20orf19     | 20 | 21090523 | 6 | 2.642761 |
| rs4815025      | C20orf19     | 20 | 21090523 | 7 | 1.207515 |
| rs4815025      | C20orf19     | 20 | 21090523 | 1 | 0.579279 |
| rs4815025      | C20orf19     | 20 | 21090523 | 3 | 0.297068 |
| rs2567609      | SSTR4        | 20 | 22965017 | 1 | 0.952635 |
| rs2567609      | SSTR4        | 20 | 22965017 | 8 | 0.935267 |
| rs2567609      | SSTR4        | 20 | 22965017 | 2 | 0.44189  |
| rs3176126      | THBD         | 20 | 22974271 | 6 | 0.312437 |
| rs3176126      | THBD         | 20 | 22974271 | 4 | 2.508808 |
| rs1962         | THBD         | 20 | 22974496 | 5 | 0.27802  |
| rs1042579      | THBD         | 20 | 22976724 | 2 | 5.688032 |
| rs1042579      | THBD         | 20 | 22976724 | 8 | 1.048081 |
| rs7988         | GZF1         | 20 | 23300685 | 1 | 6.06859  |
| rs7988         | GZF1         | 20 | 23300685 | 4 | 10.2448  |
| rs7988         | GZF1         | 20 | 23300685 | 6 | 0.062633 |
| rs6137913      | NAPB         | 20 | 23305725 | 7 | 0.046518 |
| rs17750862     | NAPB         | 20 | 23325815 | 4 | 0.963402 |
| rs17750862     | NAPB         | 20 | 23325815 | 5 | 3.38849  |
| SNP20-23372613 | CSTL1        | 20 | 23372613 | 1 | 0.907104 |
| SNP20-23566571 | CST3         | 20 | 23566571 | 4 | 0.307168 |
| SNP20-23566571 | CST3         | 20 | 23566571 | 5 | 5.619359 |
| SNP20-23566571 | CST3         | 20 | 23566571 | 1 | 1.817989 |
| rs1799841      | CST5         | 20 | 23808178 | 7 | 1.50314  |
| rs11087490     | CST7         | 20 | 24877913 | 7 | 1.701385 |
| rs1056033      | CST7         | 20 | 24887590 | 3 | 0.65502  |
| rs1056033      | CST7         | 20 | 24887590 | 1 | 0.932744 |
| rs11698945     | C20orf3      | 20 | 24921247 | 5 | 0.323632 |
| rs11698945     | C20orf3      | 20 | 24921247 | 7 | 1.971624 |
| rs6115001      | ACSS1        | 20 | 24942275 | 5 | 0.936904 |
| rs6115001      | ACSS1        | 20 | 24942275 | 7 | 0.562502 |
| rs6115003      | ACSS1        | 20 | 24948734 | 7 | 1.277215 |
| rs6115003      | ACSS1        | 20 | 24948734 | 5 | 0.611301 |
| rs6050259      | ACSS1        | 20 | 24959423 | 7 | 0.054802 |
| rs6050259      | ACSS1        | 20 | 24959423 | 6 | 0.170339 |
| rs6050259      | ACSS1        | 20 | 24959423 | 8 | 3.85861  |
| rs6050259      | ACSS1        | 20 | 24959423 | 5 | 0.508997 |
| rs2076559      | ENTPD6       | 20 | 25135213 | 4 | 0.805473 |
| rs2076559      | ENTPD6       | 20 | 25135213 | 2 | 3.292065 |
| rs6050446      | ENTPD6       | 20 | 25143509 | 1 | 6.213062 |
| rs2227891      | PYGB         | 20 | 25210769 | 2 | 4.076531 |
| rs2387887      | GINS1        | 20 | 25375081 | 6 | 1.868299 |
| rs437635       | RP4-691N24.1 | 20 | 25404888 | 6 | 0.646357 |
| rs437635       | RP4-691N24.1 | 20 | 25404888 | 2 | 3.085547 |
| rs11700338     | NANP         | 20 | 25543868 | 2 | 2.054909 |
| rs11700338     | NANP         | 20 | 25543868 | 8 | 0.050903 |
| rs45520534     | DEFB123      | 20 | 29501699 | 4 | 0.479936 |

|                |              |    |          |   |          |
|----------------|--------------|----|----------|---|----------|
| rs45520534     | DEFB123      | 20 | 29501699 | 7 | 1.247456 |
| rs4911536      | DUSP15       | 20 | 29916443 | 7 | 0.140875 |
| rs6061043      | TTLL9        | 20 | 29990726 | 8 | 0.491698 |
| rs714604       | XKR7         | 20 | 30049423 | 4 | 1.768266 |
| rs714604       | XKR7         | 20 | 30049423 | 7 | 1.100835 |
| rs714604       | XKR7         | 20 | 30049423 | 5 | 2.973873 |
| rs3813922      | TSPYL3       | 20 | 30240997 | 3 | 0.672234 |
| rs11907716     | TSPYL3       | 20 | 30241461 | 5 | 0.718164 |
| rs11907716     | TSPYL3       | 20 | 30241461 | 4 | 0.026363 |
| rs11907716     | TSPYL3       | 20 | 30241461 | 7 | 3.026612 |
| rs11907235     | TSPYL3       | 20 | 30241521 | 5 | 0.384982 |
| rs11907235     | TSPYL3       | 20 | 30241521 | 7 | 0.402094 |
| rs11907235     | TSPYL3       | 20 | 30241521 | 4 | 0.698847 |
| rs17268666     | POFUT1       | 20 | 30282511 | 6 | 0.434476 |
| rs13037236     | KIF3B        | 20 | 30379122 | 3 | 0.270451 |
| rs2070090      | MAPRE1       | 20 | 30891296 | 4 | 6.619069 |
| rs13037496     | LOC388795    | 20 | 30930195 | 7 | 0.17295  |
| rs13043425     | LOC388795    | 20 | 30968850 | 7 | 0.065618 |
| rs13043425     | LOC388795    | 20 | 30968850 | 8 | 0.249021 |
| rs13037781     | LOC388795    | 20 | 30968953 | 1 | 0.060691 |
| rs6058961      | LOC388795    | 20 | 30981959 | 7 | 0.586021 |
| rs6058961      | LOC388795    | 20 | 30981959 | 1 | 0.516625 |
| rs6058961      | LOC388795    | 20 | 30981959 | 5 | 0.981945 |
| rs13045180     | LOC729476    | 20 | 30995205 | 5 | 0.462464 |
| rs1133358      | SPAG4L       | 20 | 31054347 | 4 | 4.697915 |
| rs6057717      | C20orf185    | 20 | 31120293 | 4 | 0.205177 |
| rs2424943      | C20orf186    | 20 | 31135280 | 1 | 1.118828 |
| rs735625       | RP11-49G10.8 | 20 | 31256665 | 1 | 4.092551 |
| rs1999663      | C20orf114    | 20 | 31361215 | 6 | 6.4323   |
| rs291700       | CDK5RAP1     | 20 | 31445510 | 1 | 0.645643 |
| rs291700       | CDK5RAP1     | 20 | 31445510 | 8 | 0.018926 |
| rs291700       | CDK5RAP1     | 20 | 31445510 | 7 | 0.455068 |
| rs291700       | CDK5RAP1     | 20 | 31445510 | 6 | 7.511622 |
| rs3746459      | C20orf134    | 20 | 31718894 | 5 | 0.205771 |
| rs3746459      | C20orf134    | 20 | 31718894 | 7 | 1.852243 |
| rs959144       | PXMP4        | 20 | 31758245 | 1 | 3.951852 |
| rs959144       | PXMP4        | 20 | 31758245 | 5 | 0.060633 |
| rs2747566      | ZNF341       | 20 | 31843292 | 7 | 0.12736  |
| rs2747566      | ZNF341       | 20 | 31843292 | 1 | 4.753394 |
| rs6058017      | ASIP         | 20 | 32320659 | 5 | 1.025075 |
| rs3746455      | ITCH         | 20 | 32420877 | 3 | 0.787417 |
| rs3746455      | ITCH         | 20 | 32420877 | 4 | 1.017396 |
| rs3746455      | ITCH         | 20 | 32420877 | 8 | 0.371196 |
| rs3746455      | ITCH         | 20 | 32420877 | 6 | 1.171736 |
| rs3787220      | NCOA6        | 20 | 32801412 | 1 | 0.185057 |
| rs3787220      | NCOA6        | 20 | 32801412 | 2 | 0.905959 |
| SNP20-32801775 | NCOA6        | 20 | 32801775 | 4 | 6.541963 |

|                |           |    |          |   |          |
|----------------|-----------|----|----------|---|----------|
| rs6060137      | MYH7B     | 20 | 33029141 | 1 | 2.223612 |
| rs3746446      | MYH7B     | 20 | 33038426 | 3 | 0.599322 |
| rs2425009      | MYH7B     | 20 | 33042560 | 1 | 4.289055 |
| rs2425012      | MYH7B     | 20 | 33045616 | 1 | 3.506211 |
| rs2425012      | MYH7B     | 20 | 33045616 | 3 | 0.099958 |
| SNP20-33047950 | MYH7B     | 20 | 33047950 | 8 | 0.738689 |
| SNP20-33047950 | MYH7B     | 20 | 33047950 | 1 | 1.067318 |
| SNP20-33047950 | MYH7B     | 20 | 33047950 | 3 | 0.776978 |
| rs41310801     | MYH7B     | 20 | 33047971 | 3 | 2.364649 |
| rs3746435      | MYH7B     | 20 | 33050859 | 8 | 0.983222 |
| rs3746435      | MYH7B     | 20 | 33050859 | 3 | 0.307772 |
| SNP20-33052768 | MYH7B     | 20 | 33052768 | 3 | 0.715834 |
| rs4911167      | MYH7B     | 20 | 33053757 | 1 | 4.924008 |
| rs3746429      | EDEM2     | 20 | 33167268 | 3 | 0.233052 |
| rs3746429      | EDEM2     | 20 | 33167268 | 8 | 6.318413 |
| SNP20-33298124 | MMP24     | 20 | 33298124 | 8 | 5.629441 |
| rs2425042      | LOC729580 | 20 | 33329309 | 1 | 4.360508 |
| rs2425042      | LOC729580 | 20 | 33329309 | 3 | 1.513076 |
| rs2425049      | FAM83C    | 20 | 33338134 | 3 | 1.667375 |
| rs143384       | GDF5      | 20 | 33489170 | 8 | 2.289353 |
| rs143384       | GDF5      | 20 | 33489170 | 1 | 3.379488 |
| SNP20-33489397 | GDF5      | 20 | 33489397 | 1 | 2.703438 |
| SNP20-33489397 | GDF5      | 20 | 33489397 | 8 | 2.188442 |
| rs2277862      | FER1L4    | 20 | 33616196 | 8 | 0.406614 |
| rs1046383      | EPB41L1   | 20 | 34284061 | 8 | 10.02914 |
| rs1146250      | C20orf117 | 20 | 34901127 | 5 | 0.539318 |
| rs1146250      | C20orf117 | 20 | 34901127 | 4 | 0.191426 |
| rs1146250      | C20orf117 | 20 | 34901127 | 3 | 0.458939 |
| rs1146250      | C20orf117 | 20 | 34901127 | 2 | 0.467363 |
| rs1146250      | C20orf117 | 20 | 34901127 | 8 | 7.931765 |
| rs1146250      | C20orf117 | 20 | 34901127 | 6 | 0.321387 |
| rs1146250      | C20orf117 | 20 | 34901127 | 1 | 0.807812 |
| rs1744760      | C20orf132 | 20 | 35174208 | 5 | 0.55192  |
| rs1744760      | C20orf132 | 20 | 35174208 | 3 | 1.280267 |
| rs1744760      | C20orf132 | 20 | 35174208 | 1 | 5.745885 |
| rs1744769      | C20orf132 | 20 | 35203006 | 4 | 1.359123 |
| rs1744769      | C20orf132 | 20 | 35203006 | 8 | 3.42095  |
| rs1615246      | C20orf132 | 20 | 35216908 | 1 | 4.965162 |
| rs1615246      | C20orf132 | 20 | 35216908 | 8 | 1.220255 |
| rs1615246      | C20orf132 | 20 | 35216908 | 3 | 0.615234 |
| rs1615246      | C20orf132 | 20 | 35216908 | 5 | 0.365413 |
| SNP20-35229955 | C20orf132 | 20 | 35229955 | 1 | 3.462651 |
| rs1043415      | MANBAL    | 20 | 35378652 | 6 | 0.825252 |
| rs1043415      | MANBAL    | 20 | 35378652 | 4 | 0.549697 |
| rs1043415      | MANBAL    | 20 | 35378652 | 1 | 5.235427 |
| rs6095711      | NULL      | 20 | 35740301 | 3 | 5.329173 |
| rs12662        | VSTM2L    | 20 | 36007043 | 3 | 2.623201 |

|            |          |    |          |   |          |
|------------|----------|----|----------|---|----------|
| rs1053932  | KIAA1755 | 20 | 36274665 | 7 | 0.583185 |
| rs1053932  | KIAA1755 | 20 | 36274665 | 3 | 0.380476 |
| rs1053931  | KIAA1755 | 20 | 36274707 | 3 | 1.116732 |
| rs1053931  | KIAA1755 | 20 | 36274707 | 7 | 0.981215 |
| rs1534967  | KIAA1755 | 20 | 36275170 | 3 | 0.247556 |
| rs1534967  | KIAA1755 | 20 | 36275170 | 7 | 1.237893 |
| rs3746471  | KIAA1755 | 20 | 36275328 | 7 | 0.930918 |
| rs760998   | KIAA1755 | 20 | 36279152 | 7 | 1.39277  |
| rs1205418  | KIAA1755 | 20 | 36293125 | 2 | 1.658857 |
| rs1205418  | KIAA1755 | 20 | 36293125 | 4 | 1.820759 |
| rs1205418  | KIAA1755 | 20 | 36293125 | 7 | 1.061754 |
| rs1205418  | KIAA1755 | 20 | 36293125 | 8 | 1.351851 |
| rs1205418  | KIAA1755 | 20 | 36293125 | 3 | 2.152181 |
| rs1341023  | BPI      | 20 | 36366074 | 4 | 0.569301 |
| rs1341023  | BPI      | 20 | 36366074 | 6 | 0.602002 |
| rs1341023  | BPI      | 20 | 36366074 | 5 | 0.454102 |
| rs1341023  | BPI      | 20 | 36366074 | 2 | 2.91311  |
| rs1341023  | BPI      | 20 | 36366074 | 3 | 0.694385 |
| rs1341024  | BPI      | 20 | 36366090 | 6 | 2.378974 |
| rs1341024  | BPI      | 20 | 36366090 | 5 | 1.199022 |
| rs1341024  | BPI      | 20 | 36366090 | 2 | 4.093168 |
| rs1341024  | BPI      | 20 | 36366090 | 3 | 1.684358 |
| rs1341024  | BPI      | 20 | 36366090 | 4 | 2.614759 |
| rs5743509  | BPI      | 20 | 36373728 | 3 | 3.12377  |
| rs4358188  | BPI      | 20 | 36380262 | 7 | 0.332604 |
| rs4358188  | BPI      | 20 | 36380262 | 5 | 0.680049 |
| rs4358188  | BPI      | 20 | 36380262 | 4 | 1.161925 |
| rs2232582  | LBP      | 20 | 36412679 | 1 | 2.287093 |
| rs2232582  | LBP      | 20 | 36412679 | 3 | 2.518092 |
| rs2232582  | LBP      | 20 | 36412679 | 2 | 2.61461  |
| rs2232596  | LBP      | 20 | 36422795 | 7 | 0.263553 |
| rs2232596  | LBP      | 20 | 36422795 | 3 | 0.213551 |
| rs745144   | LBP      | 20 | 36438950 | 5 | 0.722697 |
| rs745144   | LBP      | 20 | 36438950 | 7 | 1.292806 |
| rs745144   | LBP      | 20 | 36438950 | 6 | 0.865168 |
| rs745144   | LBP      | 20 | 36438950 | 2 | 3.439499 |
| rs745144   | LBP      | 20 | 36438950 | 4 | 0.75587  |
| rs6070809  | C20orf95 | 20 | 36691004 | 7 | 1.315587 |
| rs2245231  | ACTR5    | 20 | 36829534 | 5 | 0.343173 |
| rs2245231  | ACTR5    | 20 | 36829534 | 3 | 0.060856 |
| rs4810245  | PPP1R16B | 20 | 36982723 | 3 | 0.504156 |
| rs10392    | PPP1R16B | 20 | 36984349 | 5 | 0.548494 |
| rs10392    | PPP1R16B | 20 | 36984349 | 3 | 1.418687 |
| rs36053162 | DHX35    | 20 | 37054466 | 7 | 0.77346  |
| rs6072300  | ZHX3     | 20 | 39246101 | 4 | 4.149898 |
| rs6072300  | ZHX3     | 20 | 39246101 | 5 | 0.482207 |
| rs2664537  | ZHX3     | 20 | 39247143 | 5 | 0.77137  |



|            |           |    |          |   |          |
|------------|-----------|----|----------|---|----------|
| rs2664537  | ZHX3      | 20 | 39247143 | 4 | 8.367497 |
| rs6029617  | ZHX3      | 20 | 39362060 | 2 | 3.111102 |
| rs41277016 | LPIN3     | 20 | 39408038 | 5 | 0.30597  |
| rs6072351  | LPIN3     | 20 | 39421553 | 5 | 0.27407  |
| rs6072351  | LPIN3     | 20 | 39421553 | 2 | 5.297515 |
| rs6072352  | EMILIN3   | 20 | 39423140 | 5 | 0.024223 |
| rs1156     | CHD6      | 20 | 39465443 | 4 | 8.802556 |
| rs3746539  | PTPRT     | 20 | 40135485 | 4 | 1.141773 |
| rs3746539  | PTPRT     | 20 | 40135485 | 3 | 0.603954 |
| rs2664587  | PTPRT     | 20 | 40136226 | 3 | 0.983908 |
| rs2664587  | PTPRT     | 20 | 40136226 | 6 | 1.229823 |
| rs2664587  | PTPRT     | 20 | 40136226 | 4 | 0.950393 |
| rs2144011  | PTPRT     | 20 | 40136541 | 3 | 1.847588 |
| rs2144011  | PTPRT     | 20 | 40136541 | 6 | 0.327321 |
| rs1065155  | PTPRT     | 20 | 40139770 | 3 | 1.948526 |
| rs2866943  | PTPRT     | 20 | 40141293 | 3 | 0.303876 |
| rs6065627  | SGK2      | 20 | 41628216 | 5 | 1.65939  |
| rs285162   | MYBL2     | 20 | 41762053 | 4 | 2.665528 |
| rs285162   | MYBL2     | 20 | 41762053 | 7 | 6.274189 |
| rs1055716  | JPH2      | 20 | 42174113 | 5 | 0.823684 |
| rs1055716  | JPH2      | 20 | 42174113 | 3 | 0.60462  |
| rs2064381  | JPH2      | 20 | 42239843 | 3 | 0.472992 |
| rs2064381  | JPH2      | 20 | 42239843 | 7 | 0.716908 |
| rs2064381  | JPH2      | 20 | 42239843 | 5 | 1.497726 |
| rs2064381  | JPH2      | 20 | 42239843 | 6 | 0.65429  |
| rs1883790  | JPH2      | 20 | 42248604 | 5 | 0.470247 |
| rs11274    | C20orf111 | 20 | 42259793 | 7 | 0.621092 |
| rs731498   | C20orf111 | 20 | 42272818 | 2 | 7.926658 |
| rs731498   | C20orf111 | 20 | 42272818 | 7 | 0.590104 |
| rs731498   | C20orf111 | 20 | 42272818 | 5 | 5.155751 |
| rs731498   | C20orf111 | 20 | 42272818 | 4 | 1.675555 |
| rs3810511  | GDAP1L1   | 20 | 42342379 | 2 | 3.099612 |
| rs11699901 | R3HDML    | 20 | 42399255 | 7 | 0.684624 |
| rs1800961  | HNF4A     | 20 | 42475778 | 8 | 0.598877 |
| rs6130615  | HNF4A     | 20 | 42492851 | 7 | 1.593763 |
| rs2296530  | WISP2     | 20 | 42782149 | 4 | 0.602839 |
| rs2296530  | WISP2     | 20 | 42782149 | 8 | 1.115801 |
| rs2296530  | WISP2     | 20 | 42782149 | 3 | 0.073971 |
| rs2296530  | WISP2     | 20 | 42782149 | 1 | 2.490228 |
| rs6017414  | RIMS4     | 20 | 42814589 | 1 | 0.769759 |
| rs6017414  | RIMS4     | 20 | 42814589 | 5 | 0.636902 |
| rs1980577  | RIMS4     | 20 | 42815526 | 2 | 1.277773 |
| rs1980577  | RIMS4     | 20 | 42815526 | 6 | 1.107508 |
| rs1980577  | RIMS4     | 20 | 42815526 | 1 | 1.35602  |
| rs6073629  | STK4      | 20 | 43139973 | 7 | 0.787326 |
| rs6073629  | STK4      | 20 | 43139973 | 2 | 7.974929 |
| rs6073629  | STK4      | 20 | 43139973 | 3 | 0.699499 |

|                |          |    |          |   |          |
|----------------|----------|----|----------|---|----------|
| rs6130753      | WFDC5    | 20 | 43171582 | 3 | 0.417991 |
| rs6130753      | WFDC5    | 20 | 43171582 | 2 | 2.033344 |
| rs6130753      | WFDC5    | 20 | 43171582 | 5 | 0.766832 |
| rs6130753      | WFDC5    | 20 | 43171582 | 8 | 3.30828  |
| rs6130753      | WFDC5    | 20 | 43171582 | 4 | 1.149968 |
| rs17422688     | WFDC5    | 20 | 43172533 | 3 | 0.962092 |
| rs17422688     | WFDC5    | 20 | 43172533 | 6 | 1.583249 |
| rs6104017      | WFDC12   | 20 | 43185582 | 6 | 0.176811 |
| rs6104017      | WFDC12   | 20 | 43185582 | 5 | 1.376715 |
| rs6104018      | WFDC12   | 20 | 43185681 | 4 | 0.120714 |
| rs6104018      | WFDC12   | 20 | 43185681 | 3 | 0.619838 |
| rs6104018      | WFDC12   | 20 | 43185681 | 5 | 0.785812 |
| rs2664581      | PI3      | 20 | 43237936 | 3 | 0.109973 |
| rs2664581      | PI3      | 20 | 43237936 | 6 | 0.505559 |
| rs2233882      | SEMG1    | 20 | 43269097 | 3 | 0.117602 |
| rs2233901      | SEMG2    | 20 | 43284508 | 6 | 0.590725 |
| rs2233901      | SEMG2    | 20 | 43284508 | 3 | 0.785621 |
| rs2227275      | MATN4    | 20 | 43359987 | 5 | 0.004002 |
| rs2741500      | RBPJL    | 20 | 43378372 | 6 | 4.529409 |
| SNP20-43437573 | C20orf10 | 20 | 43437573 | 3 | 0.094844 |
| SNP20-43437573 | C20orf10 | 20 | 43437573 | 4 | 1.270293 |
| SNP20-43437573 | C20orf10 | 20 | 43437573 | 8 | 0.058924 |
| rs3746593      | WFDC6    | 20 | 43596263 | 7 | 0.305278 |
| rs765156       | SPINLW1  | 20 | 43607837 | 5 | 0.704835 |
| rs765156       | SPINLW1  | 20 | 43607837 | 3 | 1.381103 |
| rs765156       | SPINLW1  | 20 | 43607837 | 1 | 3.596193 |
| rs2250860      | WFDC8    | 20 | 43617789 | 1 | 5.138929 |
| rs2250860      | WFDC8    | 20 | 43617789 | 4 | 1.957444 |
| rs1487322      | WFDC10A  | 20 | 43693087 | 1 | 4.066603 |
| rs1487322      | WFDC10A  | 20 | 43693087 | 8 | 2.282104 |
| rs1487322      | WFDC10A  | 20 | 43693087 | 3 | 3.134807 |
| rs1487322      | WFDC10A  | 20 | 43693087 | 6 | 1.642445 |
| rs6032449      | WFDC13   | 20 | 43770130 | 1 | 0.312143 |
| rs6032449      | WFDC13   | 20 | 43770130 | 3 | 0.191437 |
| rs6032449      | WFDC13   | 20 | 43770130 | 7 | 0.968984 |
| rs6032449      | WFDC13   | 20 | 43770130 | 8 | 1.316438 |
| rs6032449      | WFDC13   | 20 | 43770130 | 2 | 2.53328  |
| rs6032449      | WFDC13   | 20 | 43770130 | 5 | 1.049611 |
| rs6032449      | WFDC13   | 20 | 43770130 | 6 | 0.498138 |
| rs6017667      | SPINT4   | 20 | 43786034 | 2 | 1.475893 |
| rs6017667      | SPINT4   | 20 | 43786034 | 3 | 0.207896 |
| rs6017667      | SPINT4   | 20 | 43786034 | 6 | 0.055487 |
| rs6017667      | SPINT4   | 20 | 43786034 | 8 | 1.917539 |
| rs6017667      | SPINT4   | 20 | 43786034 | 1 | 0.143662 |
| rs6017667      | SPINT4   | 20 | 43786034 | 5 | 0.907037 |
| rs6032474      | SPINT4   | 20 | 43787786 | 5 | 1.138715 |
| rs6032474      | SPINT4   | 20 | 43787786 | 6 | 1.113747 |

|                |         |    |          |   |          |
|----------------|---------|----|----------|---|----------|
| rs6032474      | SPINT4  | 20 | 43787786 | 1 | 0.525998 |
| rs6032474      | SPINT4  | 20 | 43787786 | 3 | 0.361463 |
| rs6032474      | SPINT4  | 20 | 43787786 | 2 | 1.227976 |
| rs232259       | SPINT4  | 20 | 43787801 | 5 | 1.185921 |
| rs232259       | SPINT4  | 20 | 43787801 | 1 | 2.052275 |
| rs232259       | SPINT4  | 20 | 43787801 | 7 | 1.272991 |
| rs232259       | SPINT4  | 20 | 43787801 | 3 | 1.776792 |
| rs2664529      | WFDC3   | 20 | 43836276 | 1 | 1.378591 |
| rs2664529      | WFDC3   | 20 | 43836276 | 8 | 0.644643 |
| rs2664529      | WFDC3   | 20 | 43836276 | 2 | 1.692748 |
| rs2664529      | WFDC3   | 20 | 43836276 | 3 | 1.30206  |
| rs2664529      | WFDC3   | 20 | 43836276 | 6 | 0.216966 |
| rs6032538      | WFDC3   | 20 | 43851082 | 1 | 0.212635 |
| rs6032538      | WFDC3   | 20 | 43851082 | 5 | 0.026716 |
| rs6032538      | WFDC3   | 20 | 43851082 | 6 | 0.816314 |
| rs6032538      | WFDC3   | 20 | 43851082 | 3 | 0.658635 |
| rs6032538      | WFDC3   | 20 | 43851082 | 2 | 0.638049 |
| rs8860         | TNNC2   | 20 | 43885308 | 8 | 1.288829 |
| rs8860         | TNNC2   | 20 | 43885308 | 7 | 0.077129 |
| rs8860         | TNNC2   | 20 | 43885308 | 3 | 0.063662 |
| rs4629         | TNNC2   | 20 | 43886104 | 8 | 3.927599 |
| rs4629         | TNNC2   | 20 | 43886104 | 1 | 0.851156 |
| rs4629         | TNNC2   | 20 | 43886104 | 2 | 3.93566  |
| rs4629         | TNNC2   | 20 | 43886104 | 3 | 1.022353 |
| rs4629         | TNNC2   | 20 | 43886104 | 6 | 0.371068 |
| rs4638862      | SNX21   | 20 | 43902697 | 3 | 1.491096 |
| rs4638862      | SNX21   | 20 | 43902697 | 1 | 0.971119 |
| rs4638862      | SNX21   | 20 | 43902697 | 7 | 0.671737 |
| rs4638862      | SNX21   | 20 | 43902697 | 2 | 0.783401 |
| rs4638862      | SNX21   | 20 | 43902697 | 8 | 3.744231 |
| rs3848713      | SNX21   | 20 | 43904083 | 8 | 3.277192 |
| rs3848713      | SNX21   | 20 | 43904083 | 3 | 0.342763 |
| SNP20-44015842 | ZNF335  | 20 | 44015842 | 8 | 0.071878 |
| rs6032606      | ZNF335  | 20 | 44029614 | 2 | 4.700167 |
| rs6032606      | ZNF335  | 20 | 44029614 | 6 | 0.0627   |
| rs2250889      | MMP9    | 20 | 44075813 | 6 | 3.956323 |
| rs2274756      | MMP9    | 20 | 44076518 | 3 | 1.762768 |
| rs2274756      | MMP9    | 20 | 44076518 | 7 | 1.086343 |
| rs2274756      | MMP9    | 20 | 44076518 | 6 | 0.975101 |
| rs20544        | MMP9    | 20 | 44078417 | 1 | 5.134213 |
| rs20544        | MMP9    | 20 | 44078417 | 3 | 0.195698 |
| rs20544        | MMP9    | 20 | 44078417 | 8 | 3.615285 |
| rs20544        | MMP9    | 20 | 44078417 | 5 | 1.408057 |
| rs20544        | MMP9    | 20 | 44078417 | 4 | 1.477456 |
| rs1128536      | SLC12A5 | 20 | 44121406 | 4 | 0.168119 |
| rs1128536      | SLC12A5 | 20 | 44121406 | 7 | 1.1467   |
| rs9074         | SLC12A5 | 20 | 44122072 | 1 | 4.296234 |

|                |           |    |          |   |          |
|----------------|-----------|----|----------|---|----------|
| rs9074         | SLC12A5   | 20 | 44122072 | 3 | 0.602888 |
| rs9074         | SLC12A5   | 20 | 44122072 | 8 | 0.959732 |
| rs9074         | SLC12A5   | 20 | 44122072 | 5 | 0.446756 |
| rs3746523      | NCOA5     | 20 | 44123036 | 8 | 0.454064 |
| rs3746523      | NCOA5     | 20 | 44123036 | 5 | 0.376472 |
| rs3746523      | NCOA5     | 20 | 44123036 | 1 | 2.195675 |
| rs2281224      | LOC728443 | 20 | 44313694 | 5 | 1.491752 |
| rs2281224      | LOC728443 | 20 | 44313694 | 3 | 1.249664 |
| rs1044369      | SLC35C2   | 20 | 44420725 | 3 | 0.209595 |
| rs1044369      | SLC35C2   | 20 | 44420725 | 5 | 0.946305 |
| rs1044369      | SLC35C2   | 20 | 44420725 | 1 | 5.54143  |
| rs1044369      | SLC35C2   | 20 | 44420725 | 7 | 0.157921 |
| rs1044369      | SLC35C2   | 20 | 44420725 | 4 | 0.807585 |
| rs847052       | ZNF334    | 20 | 44575240 | 6 | 2.980678 |
| rs847052       | ZNF334    | 20 | 44575240 | 7 | 2.958793 |
| rs847052       | ZNF334    | 20 | 44575240 | 5 | 1.080638 |
| rs847052       | ZNF334    | 20 | 44575240 | 4 | 5.34807  |
| rs12617        | SLC13A3   | 20 | 44620155 | 7 | 0.620633 |
| rs12617        | SLC13A3   | 20 | 44620155 | 4 | 0.066466 |
| rs8149         | SLC13A3   | 20 | 44620648 | 4 | 0.101374 |
| rs8149         | SLC13A3   | 20 | 44620648 | 7 | 1.442666 |
| rs202391       | SLC13A3   | 20 | 44628311 | 4 | 5.98287  |
| rs1136544      | SLC2A10   | 20 | 44798245 | 8 | 7.161608 |
| rs1136544      | SLC2A10   | 20 | 44798245 | 4 | 0.56631  |
| rs1136544      | SLC2A10   | 20 | 44798245 | 5 | 0.077158 |
| rs1136544      | SLC2A10   | 20 | 44798245 | 3 | 0.538685 |
| rs1136544      | SLC2A10   | 20 | 44798245 | 7 | 4.720622 |
| rs1136544      | SLC2A10   | 20 | 44798245 | 6 | 2.424795 |
| rs6094752      | NCOA3     | 20 | 45689831 | 7 | 0.053782 |
| rs2230782      | NCOA3     | 20 | 45698295 | 7 | 0.28708  |
| SNP20-45799043 | SULF2     | 20 | 45799043 | 7 | 0.327018 |
| SNP20-45799043 | SULF2     | 20 | 45799043 | 4 | 0.25987  |
| SNP20-45799043 | SULF2     | 20 | 45799043 | 6 | 0.399582 |
| SNP20-45799043 | SULF2     | 20 | 45799043 | 8 | 7.982149 |
| rs2664570      | PREX1     | 20 | 46674765 | 3 | 0.659356 |
| rs2598         | PREX1     | 20 | 46675025 | 3 | 0.69082  |
| rs2598         | PREX1     | 20 | 46675025 | 8 | 1.695422 |
| rs16993997     | PREX1     | 20 | 46692170 | 3 | 0.598023 |
| rs16993997     | PREX1     | 20 | 46692170 | 5 | 0.457449 |
| rs6066802      | PREX1     | 20 | 46694424 | 3 | 0.440704 |
| rs6012504      | PREX1     | 20 | 46695956 | 1 | 2.146622 |
| rs41283558     | PREX1     | 20 | 46702640 | 5 | 0.349622 |
| rs41283558     | PREX1     | 20 | 46702640 | 3 | 0.221041 |
| rs3746820      | PREX1     | 20 | 46741025 | 6 | 0.125163 |
| rs3746820      | PREX1     | 20 | 46741025 | 5 | 0.598845 |
| rs3746820      | PREX1     | 20 | 46741025 | 4 | 1.792446 |
| rs7689         | ZNFX1     | 20 | 47295857 | 1 | 0.513054 |

|                |           |    |          |   |          |
|----------------|-----------|----|----------|---|----------|
| rs8123912      | ZNFX1     | 20 | 47296689 | 3 | 0.10378  |
| rs8123912      | ZNFX1     | 20 | 47296689 | 4 | 0.74377  |
| rs8123912      | ZNFX1     | 20 | 47296689 | 8 | 0.83239  |
| rs6512577      | ZNFX1     | 20 | 47299191 | 4 | 0.006238 |
| rs6512577      | ZNFX1     | 20 | 47299191 | 3 | 0.502362 |
| rs6512577      | ZNFX1     | 20 | 47299191 | 8 | 0.134483 |
| GA017266       | ZNFX1     | 20 | 47305784 | 1 | 0.465646 |
| GA017266       | ZNFX1     | 20 | 47305784 | 2 | 7.77665  |
| GA017266       | ZNFX1     | 20 | 47305784 | 6 | 9.431555 |
| rs1051295      | KCNB1     | 20 | 47422312 | 3 | 1.296807 |
| rs5628         | PTGIS     | 20 | 47574089 | 2 | 0.091522 |
| rs2235855      | B4GALT5   | 20 | 47692441 | 8 | 3.002167 |
| rs2235855      | B4GALT5   | 20 | 47692441 | 4 | 0.045057 |
| rs1062840      | SLC9A8    | 20 | 47938873 | 3 | 0.277555 |
| rs495337       | SPATA2    | 20 | 47955737 | 3 | 0.024427 |
| rs495337       | SPATA2    | 20 | 47955737 | 1 | 0.26422  |
| rs6067283      | KRT18P4   | 20 | 48007458 | 3 | 0.60141  |
| rs6067283      | KRT18P4   | 20 | 48007458 | 6 | 1.621145 |
| SNP20-48034038 | SNAI1     | 20 | 48034038 | 3 | 0.886908 |
| rs1543442      | SNAI1     | 20 | 48038206 | 4 | 4.484191 |
| rs1543442      | SNAI1     | 20 | 48038206 | 6 | 0.310738 |
| rs8184448      | LOC284751 | 20 | 48348196 | 5 | 0.169109 |
| rs8184448      | LOC284751 | 20 | 48348196 | 3 | 2.251651 |
| rs8184448      | LOC284751 | 20 | 48348196 | 1 | 5.699613 |
| rs8184448      | LOC284751 | 20 | 48348196 | 4 | 0.840421 |
| rs4811111      | KCNG1     | 20 | 49058855 | 7 | 1.263583 |
| rs4809820      | KCNG1     | 20 | 49059030 | 7 | 0.322063 |
| rs17802735     | SALL4     | 20 | 49838909 | 1 | 2.816881 |
| SNP20-49840909 | SALL4     | 20 | 49840909 | 4 | 7.670384 |
| SNP20-49840909 | SALL4     | 20 | 49840909 | 1 | 0.243648 |
| SNP20-49840909 | SALL4     | 20 | 49840909 | 2 | 0.120857 |
| rs3746415      | ZFP64     | 20 | 50202590 | 3 | 0.645025 |
| rs3746415      | ZFP64     | 20 | 50202590 | 4 | 0.548535 |
| rs739869       | TSHZ2     | 20 | 51303743 | 6 | 3.619137 |
| rs1952         | BCAS1     | 20 | 51994050 | 2 | 3.194376 |
| rs1055251      | BCAS1     | 20 | 51994191 | 6 | 1.369103 |
| rs1055251      | BCAS1     | 20 | 51994191 | 1 | 5.971269 |
| rs1055249      | BCAS1     | 20 | 51994199 | 4 | 3.534964 |
| rs1055249      | BCAS1     | 20 | 51994199 | 5 | 3.110959 |
| rs1055249      | BCAS1     | 20 | 51994199 | 1 | 5.686346 |
| rs1055249      | BCAS1     | 20 | 51994199 | 6 | 0.680302 |
| rs35575210     | BCAS1     | 20 | 52007378 | 2 | 1.948293 |
| rs6022903      | BCAS1     | 20 | 52045956 | 3 | 0.800352 |
| rs394732       | BCAS1     | 20 | 52108595 | 6 | 1.300773 |
| rs394732       | BCAS1     | 20 | 52108595 | 3 | 0.191529 |
| rs394732       | BCAS1     | 20 | 52108595 | 8 | 2.006324 |
| rs394732       | BCAS1     | 20 | 52108595 | 1 | 4.383573 |

|            |           |    |          |   |          |
|------------|-----------|----|----------|---|----------|
| rs2020975  | BCAS1     | 20 | 52108666 | 4 | 0.199622 |
| rs2020975  | BCAS1     | 20 | 52108666 | 8 | 3.178272 |
| rs16998896 | BCAS1     | 20 | 52120434 | 7 | 2.24509  |
| rs16998896 | BCAS1     | 20 | 52120434 | 3 | 3.146753 |
| rs4809957  | CYP24A1   | 20 | 52204578 | 3 | 0.488029 |
| rs4809957  | CYP24A1   | 20 | 52204578 | 7 | 0.085194 |
| rs4809957  | CYP24A1   | 20 | 52204578 | 2 | 2.716496 |
| rs2762934  | CYP24A1   | 20 | 52204668 | 1 | 1.509773 |
| rs2762934  | CYP24A1   | 20 | 52204668 | 8 | 1.182286 |
| rs6068816  | CYP24A1   | 20 | 52214498 | 6 | 5.114048 |
| rs2296241  | CYP24A1   | 20 | 52219626 | 4 | 3.669177 |
| rs2296241  | CYP24A1   | 20 | 52219626 | 6 | 0.083761 |
| rs2296241  | CYP24A1   | 20 | 52219626 | 8 | 2.284395 |
| rs2296241  | CYP24A1   | 20 | 52219626 | 1 | 4.40742  |
| rs2296241  | CYP24A1   | 20 | 52219626 | 7 | 1.216285 |
| rs2296241  | CYP24A1   | 20 | 52219626 | 3 | 1.358599 |
| rs2842     | DOK5      | 20 | 52700989 | 7 | 0.485531 |
| rs15899    | DOK5      | 20 | 52701034 | 1 | 0.394485 |
| rs15899    | DOK5      | 20 | 52701034 | 4 | 1.405197 |
| rs15899    | DOK5      | 20 | 52701034 | 3 | 0.687144 |
| rs15899    | DOK5      | 20 | 52701034 | 5 | 0.235493 |
| rs2843     | DOK5      | 20 | 52701042 | 2 | 0.401677 |
| rs2843     | DOK5      | 20 | 52701042 | 3 | 0.056622 |
| rs2843     | DOK5      | 20 | 52701042 | 1 | 0.753071 |
| rs3746619  | MC3R      | 20 | 54257212 | 3 | 3.923252 |
| rs3827103  | MC3R      | 20 | 54257436 | 3 | 1.366089 |
| rs3746624  | C20orf32  | 20 | 54467042 | 1 | 0.156272 |
| rs3746624  | C20orf32  | 20 | 54467042 | 3 | 0.38276  |
| rs3746626  | C20orf32  | 20 | 54467120 | 1 | 0.979603 |
| rs3746626  | C20orf32  | 20 | 54467120 | 3 | 0.251593 |
| rs2296130  | C20orf107 | 20 | 54544778 | 1 | 3.405687 |
| rs2296130  | C20orf107 | 20 | 54544778 | 5 | 3.397266 |
| rs11697430 | LOC728902 | 20 | 55170571 | 2 | 2.191766 |
| rs11697476 | LOC728902 | 20 | 55170641 | 8 | 0.055243 |
| rs11697476 | LOC728902 | 20 | 55170641 | 2 | 0.187524 |
| rs10375    | BMP7      | 20 | 55179088 | 6 | 2.55044  |
| rs10375    | BMP7      | 20 | 55179088 | 5 | 0.167184 |
| rs10375    | BMP7      | 20 | 55179088 | 7 | 3.73022  |
| rs10375    | BMP7      | 20 | 55179088 | 1 | 3.031939 |
| rs6064531  | SPO11     | 20 | 55352346 | 3 | 0.183396 |
| rs6070067  | SPO11     | 20 | 55352394 | 1 | 1.08819  |
| rs6070067  | SPO11     | 20 | 55352394 | 5 | 1.486386 |
| rs6070067  | SPO11     | 20 | 55352394 | 7 | 2.15145  |
| rs6070122  | CTCFL     | 20 | 55517169 | 3 | 0.862729 |
| rs6070122  | CTCFL     | 20 | 55517169 | 4 | 0.081173 |
| rs1042521  | PCK1      | 20 | 55569942 | 1 | 0.114033 |
| rs1042521  | PCK1      | 20 | 55569942 | 4 | 0.559387 |

|                |          |    |          |   |          |
|----------------|----------|----|----------|---|----------|
| rs1042521      | PCK1     | 20 | 55569942 | 7 | 0.164776 |
| rs1042521      | PCK1     | 20 | 55569942 | 6 | 1.217316 |
| rs1062601      | PCK1     | 20 | 55571240 | 1 | 0.792585 |
| rs1062601      | PCK1     | 20 | 55571240 | 4 | 0.421968 |
| rs1062601      | PCK1     | 20 | 55571240 | 7 | 0.915867 |
| SNP20-55572054 | PCK1     | 20 | 55572054 | 4 | 1.709058 |
| rs1042531      | PCK1     | 20 | 55574386 | 7 | 0.052599 |
| rs1042531      | PCK1     | 20 | 55574386 | 3 | 0.296774 |
| rs4811885      | ZBP1     | 20 | 55612334 | 5 | 0.758263 |
| rs4811885      | ZBP1     | 20 | 55612334 | 2 | 1.122423 |
| rs4811885      | ZBP1     | 20 | 55612334 | 1 | 0.881639 |
| rs6064572      | ZBP1     | 20 | 55612828 | 5 | 0.522352 |
| rs41275646     | ZBP1     | 20 | 55618615 | 4 | 0.087711 |
| rs2073145      | ZBP1     | 20 | 55624040 | 5 | 1.203346 |
| rs2073145      | ZBP1     | 20 | 55624040 | 3 | 0.931099 |
| rs6025692      | TMEPAI   | 20 | 55658139 | 1 | 4.621764 |
| rs584855       | C20orf86 | 20 | 56227112 | 5 | 0.261967 |
| rs6026220      | RAB22A   | 20 | 56373559 | 5 | 0.522025 |
| rs6026220      | RAB22A   | 20 | 56373559 | 6 | 0.800017 |
| rs6026220      | RAB22A   | 20 | 56373559 | 3 | 1.13152  |
| rs1045408      | RAB22A   | 20 | 56375488 | 8 | 7.767637 |
| rs1045408      | RAB22A   | 20 | 56375488 | 4 | 0.167032 |
| rs1045408      | RAB22A   | 20 | 56375488 | 2 | 2.649128 |
| rs6070466      | VAPB     | 20 | 56453450 | 7 | 0.628391 |
| rs1059794      | VAPB     | 20 | 56453634 | 1 | 4.525779 |
| rs2180481      | APCDD1L  | 20 | 56468469 | 5 | 1.145156 |
| rs2295440      | APCDD1L  | 20 | 56468482 | 5 | 0.355857 |
| rs2295440      | APCDD1L  | 20 | 56468482 | 1 | 5.020526 |
| rs2295440      | APCDD1L  | 20 | 56468482 | 6 | 0.530986 |
| rs2295440      | APCDD1L  | 20 | 56468482 | 4 | 1.263607 |
| SNP20-56476071 | APCDD1L  | 20 | 56476071 | 5 | 1.406478 |
| SNP20-56479171 | APCDD1L  | 20 | 56479171 | 5 | 1.035241 |
| rs218457       | MGC4294  | 20 | 56643660 | 8 | 0.405297 |
| rs218457       | MGC4294  | 20 | 56643660 | 6 | 1.634544 |
| rs218457       | MGC4294  | 20 | 56643660 | 1 | 0.346765 |
| rs218457       | MGC4294  | 20 | 56643660 | 7 | 2.718901 |
| rs3761133      | MGC4294  | 20 | 56643886 | 6 | 0.983302 |
| rs3761133      | MGC4294  | 20 | 56643886 | 1 | 0.050915 |
| rs3761133      | MGC4294  | 20 | 56643886 | 8 | 0.854501 |
| rs2296524      | STX16    | 20 | 56677899 | 5 | 0.783205 |
| rs2296524      | STX16    | 20 | 56677899 | 7 | 0.316768 |
| rs2296524      | STX16    | 20 | 56677899 | 2 | 0.389366 |
| rs2296524      | STX16    | 20 | 56677899 | 4 | 0.045706 |
| rs2296524      | STX16    | 20 | 56677899 | 6 | 0.263649 |
| rs2296524      | STX16    | 20 | 56677899 | 1 | 0.011618 |
| rs1800900      | GNAS     | 20 | 56848505 | 3 | 0.805893 |
| rs1800900      | GNAS     | 20 | 56848505 | 4 | 2.303338 |

|                |           |    |          |   |          |
|----------------|-----------|----|----------|---|----------|
| rs3730171      | GNAS      | 20 | 56917636 | 4 | 0.558128 |
| rs34563478     | TH1L      | 20 | 56998090 | 2 | 5.679988 |
| rs10485828     | TUBB1     | 20 | 57034050 | 5 | 0.029381 |
| rs10485828     | TUBB1     | 20 | 57034050 | 3 | 0.311916 |
| rs10485828     | TUBB1     | 20 | 57034050 | 6 | 1.962089 |
| rs10485828     | TUBB1     | 20 | 57034050 | 8 | 2.857815 |
| rs259956       | C20orf174 | 20 | 57262696 | 1 | 3.042696 |
| rs13039338     | SYCP2     | 20 | 57910236 | 6 | 0.787896 |
| rs7267644      | CDH26     | 20 | 58015195 | 1 | 4.09367  |
| rs11698042     | LOC284757 | 20 | 58328202 | 7 | 3.636338 |
| rs3761222      | CDH4      | 20 | 59945423 | 5 | 0.257404 |
| rs3761222      | CDH4      | 20 | 59945423 | 2 | 6.896447 |
| rs1135961      | PSMA7     | 20 | 60146727 | 6 | 0.218162 |
| rs1135961      | PSMA7     | 20 | 60146727 | 4 | 0.264059 |
| rs2236527      | GTPBP5    | 20 | 60201892 | 5 | 0.189335 |
| rs2184161      | GTPBP5    | 20 | 60209670 | 1 | 6.138971 |
| rs2184161      | GTPBP5    | 20 | 60209670 | 7 | 0.447329 |
| rs6142991      | GTPBP5    | 20 | 60209868 | 5 | 5.370279 |
| rs2184157      | GTPBP5    | 20 | 60210550 | 1 | 4.201163 |
| rs2184157      | GTPBP5    | 20 | 60210550 | 8 | 6.139837 |
| rs2184157      | GTPBP5    | 20 | 60210550 | 7 | 0.166667 |
| rs6121980      | OSBPL2    | 20 | 60303075 | 5 | 0.230249 |
| rs6121980      | OSBPL2    | 20 | 60303075 | 1 | 5.24812  |
| rs41307205     | LAMA5     | 20 | 60321086 | 3 | 0.358532 |
| rs2297587      | LAMA5     | 20 | 60329092 | 1 | 5.453149 |
| rs2297587      | LAMA5     | 20 | 60329092 | 8 | 0.062708 |
| SNP20-60331167 | LAMA5     | 20 | 60331167 | 1 | 2.530138 |
| SNP20-60331167 | LAMA5     | 20 | 60331167 | 8 | 0.018202 |
| SNP20-60331167 | LAMA5     | 20 | 60331167 | 5 | 0.511524 |
| rs2427286      | LAMA5     | 20 | 60338248 | 3 | 0.604978 |
| rs2151513      | LAMA5     | 20 | 60340841 | 3 | 0.040848 |
| rs709206       | CABLES2   | 20 | 60397170 | 3 | 0.283502 |
| rs6122080      | SLCO4A1   | 20 | 60758172 | 7 | 0.192181 |
| rs6122080      | SLCO4A1   | 20 | 60758172 | 3 | 0.202631 |
| rs34985812     | SLCO4A1   | 20 | 60769970 | 7 | 0.400532 |
| rs2427444      | NTSR1     | 20 | 60864318 | 2 | 4.371992 |
| rs2249903      | COL9A3    | 20 | 60930569 | 1 | 1.94528  |
| rs2249903      | COL9A3    | 20 | 60930569 | 4 | 0.758378 |
| rs751557       | COL9A3    | 20 | 60933967 | 8 | 1.316755 |
| rs751557       | COL9A3    | 20 | 60933967 | 1 | 0.228112 |
| rs751557       | COL9A3    | 20 | 60933967 | 7 | 1.620911 |
| rs751557       | COL9A3    | 20 | 60933967 | 2 | 0.288802 |
| rs751557       | COL9A3    | 20 | 60933967 | 4 | 1.299683 |
| rs2294995      | COL9A3    | 20 | 60939016 | 1 | 4.856257 |
| rs2294995      | COL9A3    | 20 | 60939016 | 3 | 0.55562  |
| rs1048100      | COL9A3    | 20 | 60942518 | 7 | 0.955958 |
| rs1048100      | COL9A3    | 20 | 60942518 | 6 | 3.116586 |



|                |         |    |          |   |          |
|----------------|---------|----|----------|---|----------|
| SNP20-60961939 | TCFL5   | 20 | 60961939 | 7 | 0.833964 |
| SNP20-60961939 | TCFL5   | 20 | 60961939 | 6 | 5.966719 |
| rs6011447      | DIDO1   | 20 | 60989677 | 1 | 0.557339 |
| rs6011447      | DIDO1   | 20 | 60989677 | 8 | 0.699456 |
| rs6011447      | DIDO1   | 20 | 60989677 | 3 | 0.330451 |
| rs6011447      | DIDO1   | 20 | 60989677 | 6 | 0.461658 |
| rs6011447      | DIDO1   | 20 | 60989677 | 4 | 0.145799 |
| rs6011447      | DIDO1   | 20 | 60989677 | 2 | 1.142811 |
| rs3746767      | DIDO1   | 20 | 60990311 | 6 | 0.856206 |
| rs3746767      | DIDO1   | 20 | 60990311 | 8 | 5.575291 |
| rs3746767      | DIDO1   | 20 | 60990311 | 3 | 0.946739 |
| rs3746767      | DIDO1   | 20 | 60990311 | 1 | 3.634219 |
| rs3746766      | DIDO1   | 20 | 60990433 | 4 | 0.959945 |
| rs3746766      | DIDO1   | 20 | 60990433 | 8 | 0.573319 |
| rs3746766      | DIDO1   | 20 | 60990433 | 1 | 0.114715 |
| rs3746766      | DIDO1   | 20 | 60990433 | 3 | 0.589728 |
| rs3746766      | DIDO1   | 20 | 60990433 | 2 | 2.644889 |
| rs3746766      | DIDO1   | 20 | 60990433 | 6 | 0.113706 |
| rs3746765      | DIDO1   | 20 | 60991239 | 1 | 0.139019 |
| rs3746765      | DIDO1   | 20 | 60991239 | 8 | 0.187065 |
| rs3746765      | DIDO1   | 20 | 60991239 | 3 | 0.418754 |
| rs6090153      | DIDO1   | 20 | 60991628 | 6 | 0.146074 |
| rs6090153      | DIDO1   | 20 | 60991628 | 1 | 3.790266 |
| rs6090153      | DIDO1   | 20 | 60991628 | 3 | 0.492939 |
| rs6090153      | DIDO1   | 20 | 60991628 | 8 | 0.117006 |
| rs2273083      | DIDO1   | 20 | 60991960 | 3 | 0.965843 |
| rs2273083      | DIDO1   | 20 | 60991960 | 4 | 0.817065 |
| rs2273083      | DIDO1   | 20 | 60991960 | 6 | 2.189065 |
| rs2273083      | DIDO1   | 20 | 60991960 | 8 | 0.302272 |
| rs2273083      | DIDO1   | 20 | 60991960 | 2 | 3.277773 |
| rs2273083      | DIDO1   | 20 | 60991960 | 1 | 1.197253 |
| rs1883847      | DIDO1   | 20 | 60998716 | 1 | 5.139866 |
| rs1883847      | DIDO1   | 20 | 60998716 | 7 | 0.340546 |
| rs2295000      | DIDO1   | 20 | 61007383 | 8 | 0.418378 |
| rs2295000      | DIDO1   | 20 | 61007383 | 3 | 0.462637 |
| rs2295000      | DIDO1   | 20 | 61007383 | 6 | 3.039217 |
| rs2245341      | C2orf59 | 20 | 61058604 | 3 | 0.45753  |
| rs2245341      | C2orf59 | 20 | 61058604 | 6 | 0.673884 |
| rs2245341      | C2orf59 | 20 | 61058604 | 7 | 1.851294 |
| rs2248900      | C2orf59 | 20 | 61066081 | 8 | 0.848096 |
| rs2248900      | C2orf59 | 20 | 61066081 | 6 | 0.762011 |
| rs2248900      | C2orf59 | 20 | 61066081 | 7 | 0.301476 |
| rs2248900      | C2orf59 | 20 | 61066081 | 3 | 0.337451 |
| rs752430       | C2orf59 | 20 | 61069833 | 3 | 0.125238 |
| rs752430       | C2orf59 | 20 | 61069833 | 8 | 0.838105 |
| rs752430       | C2orf59 | 20 | 61069833 | 2 | 3.923183 |
| rs752430       | C2orf59 | 20 | 61069833 | 6 | 3.271366 |

|                |          |    |          |   |          |
|----------------|----------|----|----------|---|----------|
| rs6090206      | C20orf51 | 20 | 61138808 | 3 | 1.027804 |
| rs1077019      | BIRC7    | 20 | 61341172 | 7 | 0.639462 |
| rs872808       | NKAIN4   | 20 | 61349395 | 4 | 0.569644 |
| rs2236194      | NKAIN4   | 20 | 61349454 | 7 | 1.708544 |
| rs1129659      | NKAIN4   | 20 | 61350614 | 7 | 0.33818  |
| rs1129659      | NKAIN4   | 20 | 61350614 | 8 | 0.985726 |
| rs927081       | NKAIN4   | 20 | 61351741 | 8 | 2.225675 |
| rs11542296     | ARFGAP1  | 20 | 61378427 | 8 | 2.079254 |
| rs11542296     | ARFGAP1  | 20 | 61378427 | 4 | 0.086471 |
| rs1044397      | CHRNA4   | 20 | 61451548 | 4 | 1.665554 |
| rs1044396      | CHRNA4   | 20 | 61451578 | 2 | 1.193985 |
| rs2297385      | KCNQ2    | 20 | 61541410 | 5 | 0.120271 |
| rs2297385      | KCNQ2    | 20 | 61541410 | 7 | 1.906565 |
| rs2297385      | KCNQ2    | 20 | 61541410 | 6 | 0.638656 |
| rs2274860      | EEF1A2   | 20 | 61596743 | 4 | 4.341225 |
| rs11551685     | PRIC285  | 20 | 61662381 | 8 | 8.150501 |
| rs3810481      | PRIC285  | 20 | 61663889 | 6 | 1.667515 |
| rs3810481      | PRIC285  | 20 | 61663889 | 2 | 1.630216 |
| rs3810481      | PRIC285  | 20 | 61663889 | 7 | 0.030143 |
| SNP20-61665157 | PRIC285  | 20 | 61665157 | 6 | 0.496804 |
| rs310630       | PRIC285  | 20 | 61665531 | 7 | 1.144657 |
| rs310630       | PRIC285  | 20 | 61665531 | 2 | 1.316308 |
| rs310630       | PRIC285  | 20 | 61665531 | 3 | 0.540449 |
| SNP20-61666477 | PRIC285  | 20 | 61666477 | 7 | 0.634111 |
| SNP20-61666477 | PRIC285  | 20 | 61666477 | 8 | 1.322038 |
| SNP20-61666477 | PRIC285  | 20 | 61666477 | 6 | 0.232293 |
| rs310631       | PRIC285  | 20 | 61666697 | 3 | 0.255879 |
| rs310631       | PRIC285  | 20 | 61666697 | 7 | 0.048342 |
| rs1757752      | PRIC285  | 20 | 61671304 | 3 | 0.355628 |
| rs311496       | GMEB2    | 20 | 61692054 | 5 | 6.599609 |
| rs311496       | GMEB2    | 20 | 61692054 | 3 | 0.852045 |
| rs41302954     | RTEL1    | 20 | 61779958 | 8 | 0.967483 |
| rs6062302      | RTEL1    | 20 | 61791412 | 8 | 3.090108 |
| rs6062302      | RTEL1    | 20 | 61791412 | 3 | 0.989271 |
| rs6062302      | RTEL1    | 20 | 61791412 | 7 | 0.144779 |
| rs3208007      | RTEL1    | 20 | 61792732 | 7 | 0.772273 |
| rs3208007      | RTEL1    | 20 | 61792732 | 3 | 0.836253 |
| SNP20-61798819 | TNFRSF6B | 20 | 61798819 | 3 | 0.224774 |
| SNP20-61798819 | TNFRSF6B | 20 | 61798819 | 5 | 0.27453  |
| rs1291212      | ZGPAT    | 20 | 61810559 | 5 | 0.023409 |
| rs1151622      | ZGPAT    | 20 | 61836000 | 7 | 3.935286 |
| rs1151622      | ZGPAT    | 20 | 61836000 | 8 | 3.40528  |
| rs1151622      | ZGPAT    | 20 | 61836000 | 3 | 0.647024 |
| rs2427533      | ZGPAT    | 20 | 61836310 | 7 | 1.072375 |
| rs2427533      | ZGPAT    | 20 | 61836310 | 3 | 0.687583 |
| rs2427533      | ZGPAT    | 20 | 61836310 | 8 | 2.227095 |
| rs2427535      | ZGPAT    | 20 | 61837821 | 5 | 0.314581 |

|                |           |    |          |   |          |
|----------------|-----------|----|----------|---|----------|
| rs1151625      | LIME1     | 20 | 61840441 | 5 | 7.253375 |
| rs2427536      | SLC2A4RG  | 20 | 61843257 | 5 | 0.717547 |
| rs2427537      | ZBTB46    | 20 | 61846671 | 4 | 0.927382 |
| rs2427537      | ZBTB46    | 20 | 61846671 | 5 | 0.02034  |
| rs2427537      | ZBTB46    | 20 | 61846671 | 3 | 0.469057 |
| rs2427537      | ZBTB46    | 20 | 61846671 | 7 | 3.587873 |
| rs2427537      | ZBTB46    | 20 | 61846671 | 8 | 5.159803 |
| rs755017       | ZBTB46    | 20 | 61892066 | 5 | 0.805942 |
| rs2281929      | ZBTB46    | 20 | 61892524 | 5 | 0.737581 |
| rs817325       | ZNF512B   | 20 | 62065613 | 5 | 0.921944 |
| rs6062599      | ZNF512B   | 20 | 62065991 | 1 | 1.946553 |
| rs6062599      | ZNF512B   | 20 | 62065991 | 4 | 0.431858 |
| SNP20-62066434 | ZNF512B   | 20 | 62066434 | 1 | 4.442536 |
| SNP20-62066434 | ZNF512B   | 20 | 62066434 | 4 | 0.709927 |
| SNP20-62068110 | ZNF512B   | 20 | 62068110 | 4 | 0.343341 |
| SNP20-62068110 | ZNF512B   | 20 | 62068110 | 1 | 5.4456   |
| rs817343       | SAMD10    | 20 | 62077604 | 1 | 4.029876 |
| rs2229205      | OPRL1     | 20 | 62199875 | 4 | 1.337775 |
| rs13036542     | NPBWR2    | 20 | 62207762 | 6 | 2.889843 |
| rs4809401      | NPBWR2    | 20 | 62208012 | 2 | 2.304049 |
| rs41279348     | MYT1      | 20 | 62320802 | 7 | 0.60741  |
| rs2983433      | MYT1      | 20 | 62342396 | 3 | 0.058742 |
| rs11702489     | LOC441956 | 21 | 13974683 | 3 | 0.885032 |
| rs11702489     | LOC441956 | 21 | 13974683 | 7 | 2.247581 |
| rs11702489     | LOC441956 | 21 | 13974683 | 1 | 2.567774 |
| rs2822446      | RBM11     | 21 | 14521719 | 3 | 0.951091 |
| rs2822448      | RBM11     | 21 | 14521925 | 5 | 0.291258 |
| rs2822448      | RBM11     | 21 | 14521925 | 2 | 5.030268 |
| rs2822448      | RBM11     | 21 | 14521925 | 7 | 0.533073 |
| rs2822554      | ABCC13    | 21 | 14585162 | 3 | 1.069435 |
| rs2822558      | ABCC13    | 21 | 14593715 | 3 | 0.591087 |
| rs1153312      | ABCC13    | 21 | 14594247 | 7 | 0.840105 |
| rs17002670     | STCH      | 21 | 14667761 | 2 | 3.652702 |
| rs7281104      | SAMSN1    | 21 | 14840448 | 3 | 1.398119 |
| rs1056947      | NRIP1     | 21 | 15256529 | 6 | 4.198194 |
| rs2229742      | NRIP1     | 21 | 15261043 | 4 | 0.224147 |
| rs1047978      | C21orf91  | 21 | 18091026 | 1 | 5.556823 |
| rs1047978      | C21orf91  | 21 | 18091026 | 3 | 1.076684 |
| rs1047978      | C21orf91  | 21 | 18091026 | 4 | 0.705066 |
| rs154742       | LOC643081 | 21 | 18356061 | 3 | 0.893792 |
| rs154742       | LOC643081 | 21 | 18356061 | 1 | 4.337043 |
| rs154742       | LOC643081 | 21 | 18356061 | 5 | 0.164974 |
| rs2051358      | CHODL     | 21 | 18561045 | 7 | 0.13031  |
| rs2051358      | CHODL     | 21 | 18561045 | 3 | 0.503947 |
| rs2051358      | CHODL     | 21 | 18561045 | 4 | 0.968847 |
| rs2051358      | CHODL     | 21 | 18561045 | 2 | 1.350834 |
| rs11909235     | CHODL     | 21 | 18561066 | 4 | 3.787217 |

|                |           |    |          |   |          |
|----------------|-----------|----|----------|---|----------|
| rs11909235     | CHODL     | 21 | 18561066 | 2 | 7.707818 |
| rs11909235     | CHODL     | 21 | 18561066 | 7 | 0.271755 |
| rs11909235     | CHODL     | 21 | 18561066 | 3 | 0.141811 |
| rs1051530      | CHODL     | 21 | 18561448 | 7 | 1.895048 |
| rs1051530      | CHODL     | 21 | 18561448 | 3 | 1.603856 |
| rs1051530      | CHODL     | 21 | 18561448 | 2 | 3.854392 |
| rs1051530      | CHODL     | 21 | 18561448 | 4 | 1.239503 |
| rs7276699      | PRSS7     | 21 | 18564156 | 4 | 2.226742 |
| rs7276699      | PRSS7     | 21 | 18564156 | 7 | 1.912432 |
| rs7276699      | PRSS7     | 21 | 18564156 | 3 | 1.670723 |
| rs232518       | NCAM2     | 21 | 21668058 | 2 | 4.285886 |
| rs915617       | LOC391273 | 21 | 23684542 | 1 | 0.176926 |
| rs2187053      | LOC284821 | 21 | 25657058 | 4 | 0.358749 |
| rs2187053      | LOC284821 | 21 | 25657058 | 1 | 0.4338   |
| rs1893650      | MIRN155   | 21 | 25862686 | 7 | 0.456921 |
| rs219643       | CYYR1     | 21 | 26762438 | 3 | 0.799231 |
| rs17002187     | CYYR1     | 21 | 26762664 | 6 | 0.327196 |
| rs409630       | ADAMTS1   | 21 | 27138545 | 5 | 0.254509 |
| rs409630       | ADAMTS1   | 21 | 27138545 | 2 | 1.526113 |
| rs229071       | ADAMTS5   | 21 | 27212867 | 7 | 1.019996 |
| rs1444269      | ADAMTS5   | 21 | 27213326 | 2 | 4.293824 |
| rs1444269      | ADAMTS5   | 21 | 27213326 | 6 | 2.436648 |
| rs2830581      | ADAMTS5   | 21 | 27215671 | 6 | 1.693164 |
| rs9978597      | ADAMTS5   | 21 | 27216014 | 5 | 0.363502 |
| rs229077       | ADAMTS5   | 21 | 27217210 | 6 | 0.176173 |
| rs226794       | ADAMTS5   | 21 | 27224226 | 5 | 4.875884 |
| SNP21-27260169 | ADAMTS5   | 21 | 27260169 | 3 | 3.726226 |
| SNP21-29260991 | ZNF294    | 21 | 29260991 | 6 | 3.323028 |
| rs2245431      | ZNF294    | 21 | 29279034 | 6 | 0.418358 |
| rs2070610      | CCT8      | 21 | 29367819 | 6 | 0.150158 |
| rs2832237      | C21orf7   | 21 | 29469554 | 6 | 1.230305 |
| rs2832237      | C21orf7   | 21 | 29469554 | 8 | 4.871585 |
| rs2832237      | C21orf7   | 21 | 29469554 | 5 | 0.506425 |
| rs2832237      | C21orf7   | 21 | 29469554 | 4 | 0.373985 |
| rs2251071      | KRTAP19-3 | 21 | 30785718 | 3 | 0.529741 |
| rs9977815      | TIAM1     | 21 | 31758190 | 4 | 2.771232 |
| rs9977815      | TIAM1     | 21 | 31758190 | 1 | 0.17032  |
| rs2070371      | HUNK      | 21 | 32290059 | 1 | 1.751924 |
| rs2070371      | HUNK      | 21 | 32290059 | 2 | 1.144593 |
| rs2070371      | HUNK      | 21 | 32290059 | 4 | 0.408238 |
| rs9305483      | HUNK      | 21 | 32292771 | 1 | 0.887711 |
| rs9305483      | HUNK      | 21 | 32292771 | 5 | 3.502038 |
| rs9305483      | HUNK      | 21 | 32292771 | 4 | 0.521803 |
| rs9305483      | HUNK      | 21 | 32292771 | 8 | 0.807763 |
| rs2070372      | HUNK      | 21 | 32293411 | 1 | 0.327256 |
| rs2070372      | HUNK      | 21 | 32293411 | 4 | 0.03677  |
| rs2070373      | HUNK      | 21 | 32293526 | 2 | 0.981186 |

|            |           |    |          |   |          |
|------------|-----------|----|----------|---|----------|
| rs2070373  | HUNK      | 21 | 32293526 | 1 | 1.019202 |
| rs2070373  | HUNK      | 21 | 32293526 | 5 | 0.999678 |
| rs2070373  | HUNK      | 21 | 32293526 | 4 | 0.997518 |
| rs3746854  | HUNK      | 21 | 32294222 | 4 | 1.638461 |
| rs3746854  | HUNK      | 21 | 32294222 | 7 | 0.675437 |
| rs3746854  | HUNK      | 21 | 32294222 | 8 | 0.074552 |
| rs3746854  | HUNK      | 21 | 32294222 | 5 | 0.909221 |
| rs3746854  | HUNK      | 21 | 32294222 | 1 | 3.904216 |
| rs3746856  | HUNK      | 21 | 32294620 | 1 | 0.446467 |
| rs3746856  | HUNK      | 21 | 32294620 | 8 | 2.543504 |
| rs3746856  | HUNK      | 21 | 32294620 | 5 | 0.006191 |
| rs3746856  | HUNK      | 21 | 32294620 | 4 | 5.005193 |
| rs3746856  | HUNK      | 21 | 32294620 | 2 | 2.609701 |
| rs3787694  | HUNK      | 21 | 32295043 | 5 | 0.501781 |
| rs3787694  | HUNK      | 21 | 32295043 | 1 | 0.45519  |
| rs3787694  | HUNK      | 21 | 32295043 | 8 | 0.000424 |
| rs3787694  | HUNK      | 21 | 32295043 | 4 | 0.090322 |
| rs3787694  | HUNK      | 21 | 32295043 | 2 | 7.789116 |
| rs3787697  | HUNK      | 21 | 32295801 | 4 | 5.089874 |
| rs3787697  | HUNK      | 21 | 32295801 | 5 | 3.522662 |
| rs3787697  | HUNK      | 21 | 32295801 | 1 | 0.51113  |
| rs3787697  | HUNK      | 21 | 32295801 | 8 | 0.497168 |
| rs3578     | HUNK      | 21 | 32295973 | 4 | 0.511148 |
| rs3578     | HUNK      | 21 | 32295973 | 2 | 3.090748 |
| rs3578     | HUNK      | 21 | 32295973 | 1 | 0.898947 |
| rs3578     | HUNK      | 21 | 32295973 | 5 | 0.507365 |
| rs3578     | HUNK      | 21 | 32295973 | 8 | 2.260739 |
| rs2833601  | HUNK      | 21 | 32297384 | 1 | 0.58256  |
| rs2833601  | HUNK      | 21 | 32297384 | 5 | 0.183165 |
| rs2833601  | HUNK      | 21 | 32297384 | 4 | 0.160704 |
| rs2833602  | HUNK      | 21 | 32297433 | 1 | 0.748318 |
| rs2833602  | HUNK      | 21 | 32297433 | 4 | 0.952917 |
| rs11702306 | C21orf119 | 21 | 32687431 | 4 | 0.03634  |
| rs2833907  | C21orf77  | 21 | 32869651 | 3 | 0.983877 |
| rs2833907  | C21orf77  | 21 | 32869651 | 1 | 2.755264 |
| rs2833907  | C21orf77  | 21 | 32869651 | 5 | 0.481635 |
| rs7520     | TCP10L    | 21 | 32870930 | 5 | 0.545072 |
| rs1783066  | C21orf59  | 21 | 32895979 | 2 | 6.014234 |
| rs11910271 | C21orf49  | 21 | 33066416 | 7 | 0.113949 |
| rs11910271 | C21orf49  | 21 | 33066416 | 6 | 0.211397 |
| rs11910271 | C21orf49  | 21 | 33066416 | 1 | 8.078261 |
| rs11910271 | C21orf49  | 21 | 33066416 | 5 | 0.044118 |
| rs11910504 | C21orf49  | 21 | 33066456 | 5 | 1.094825 |
| rs11910504 | C21orf49  | 21 | 33066456 | 1 | 3.151175 |
| rs2833955  | C21orf62  | 21 | 33085302 | 7 | 0.159735 |
| rs2833955  | C21orf62  | 21 | 33085302 | 5 | 0.328436 |
| rs2833955  | C21orf62  | 21 | 33085302 | 1 | 3.263638 |

|                |          |    |          |   |          |
|----------------|----------|----|----------|---|----------|
| rs2833955      | C21orf62 | 21 | 33085302 | 8 | 0.81271  |
| rs2833956      | C21orf62 | 21 | 33085613 | 1 | 3.973076 |
| rs2833956      | C21orf62 | 21 | 33085613 | 5 | 0.012958 |
| rs4817501      | C21orf62 | 21 | 33087650 | 1 | 5.07757  |
| rs4817501      | C21orf62 | 21 | 33087650 | 5 | 1.012119 |
| rs4817501      | C21orf62 | 21 | 33087650 | 8 | 0.427908 |
| rs2231390      | C21orf62 | 21 | 33088213 | 7 | 0.788202 |
| rs2231390      | C21orf62 | 21 | 33088213 | 1 | 3.186263 |
| rs2231390      | C21orf62 | 21 | 33088213 | 8 | 0.243114 |
| rs2231390      | C21orf62 | 21 | 33088213 | 5 | 0.500955 |
| rs762178       | OLIG2    | 21 | 33321271 | 5 | 0.665658 |
| rs762178       | OLIG2    | 21 | 33321271 | 7 | 0.936138 |
| rs1059004      | OLIG2    | 21 | 33322333 | 7 | 3.290279 |
| rs9975738      | IFNAR2   | 21 | 33524116 | 4 | 1.071853 |
| rs17860115     | IFNAR2   | 21 | 33524175 | 6 | 3.303555 |
| rs17860115     | IFNAR2   | 21 | 33524175 | 5 | 0.865972 |
| rs17860115     | IFNAR2   | 21 | 33524175 | 3 | 0.863547 |
| rs17860115     | IFNAR2   | 21 | 33524175 | 2 | 3.579545 |
| rs7279064      | IFNAR2   | 21 | 33536125 | 2 | 0.440039 |
| rs7279064      | IFNAR2   | 21 | 33536125 | 6 | 1.471024 |
| rs7279064      | IFNAR2   | 21 | 33536125 | 3 | 0.686565 |
| rs7279064      | IFNAR2   | 21 | 33536125 | 5 | 1.145494 |
| rs8178561      | IL10RB   | 21 | 33590667 | 1 | 4.187281 |
| rs2850015      | IFNAR1   | 21 | 33619134 | 7 | 0.307396 |
| rs2850015      | IFNAR1   | 21 | 33619134 | 4 | 0.828776 |
| rs2850015      | IFNAR1   | 21 | 33619134 | 3 | 0.860454 |
| rs2850015      | IFNAR1   | 21 | 33619134 | 5 | 1.240814 |
| rs17875889     | IFNAR1   | 21 | 33652172 | 6 | 6.936053 |
| rs2834217      | TMEM50B  | 21 | 33744020 | 5 | 0.221011 |
| rs2834217      | TMEM50B  | 21 | 33744020 | 1 | 0.101226 |
| rs2834217      | TMEM50B  | 21 | 33744020 | 8 | 5.617457 |
| rs2834217      | TMEM50B  | 21 | 33744020 | 2 | 6.577825 |
| rs2834217      | TMEM50B  | 21 | 33744020 | 7 | 0.330405 |
| rs2834217      | TMEM50B  | 21 | 33744020 | 4 | 0.894629 |
| SNP21-33847913 | SON      | 21 | 33847913 | 7 | 0.00664  |
| SNP21-33847913 | SON      | 21 | 33847913 | 5 | 0.753105 |
| SNP21-34161432 | ITSN1    | 21 | 34161432 | 3 | 0.689293 |
| SNP21-34161432 | ITSN1    | 21 | 34161432 | 2 | 3.934729 |
| rs2073370      | ITSN1    | 21 | 34182351 | 1 | 0.051083 |
| rs2073370      | ITSN1    | 21 | 34182351 | 3 | 0.449469 |
| rs3453         | KCNE1    | 21 | 34740933 | 1 | 1.349769 |
| rs2070356      | KCNE1    | 21 | 34742957 | 7 | 1.064027 |
| rs2070356      | KCNE1    | 21 | 34742957 | 1 | 0.290621 |
| rs2070356      | KCNE1    | 21 | 34742957 | 4 | 1.556545 |
| rs1805127      | KCNE1    | 21 | 34743691 | 3 | 0.245296 |
| rs1805127      | KCNE1    | 21 | 34743691 | 6 | 0.427489 |
| rs1805127      | KCNE1    | 21 | 34743691 | 1 | 2.171826 |

|                |           |    |          |   |          |
|----------------|-----------|----|----------|---|----------|
| rs1805127      | KCNE1     | 21 | 34743691 | 4 | 0.16648  |
| rs2834502      | KCNE1     | 21 | 34805359 | 1 | 1.675181 |
| rs762364       | SETD4     | 21 | 36328719 | 1 | 0.804377 |
| rs762364       | SETD4     | 21 | 36328719 | 3 | 0.251333 |
| rs16993814     | SETD4     | 21 | 36329941 | 7 | 0.167669 |
| rs8738         | SETD4     | 21 | 36342520 | 8 | 6.668913 |
| rs8738         | SETD4     | 21 | 36342520 | 4 | 2.724987 |
| rs2230192      | CBR1      | 21 | 36366909 | 7 | 3.522071 |
| rs9024         | CBR1      | 21 | 36367183 | 4 | 1.446835 |
| SNP21-36681827 | CHAF1B    | 21 | 36681827 | 3 | 0.044446 |
| SNP21-36681827 | CHAF1B    | 21 | 36681827 | 6 | 0.374031 |
| SNP21-36681827 | CHAF1B    | 21 | 36681827 | 8 | 0.66369  |
| rs2073601      | SIM2      | 21 | 37039178 | 3 | 0.625415 |
| rs2073601      | SIM2      | 21 | 37039178 | 4 | 2.916608 |
| rs2073601      | SIM2      | 21 | 37039178 | 7 | 2.701052 |
| rs2073602      | SIM2      | 21 | 37039375 | 1 | 0.593173 |
| rs2073602      | SIM2      | 21 | 37039375 | 8 | 0.222495 |
| rs2073602      | SIM2      | 21 | 37039375 | 2 | 4.151083 |
| rs2073417      | SIM2      | 21 | 37042588 | 1 | 2.116055 |
| rs2073417      | SIM2      | 21 | 37042588 | 8 | 1.299446 |
| rs2051397      | SIM2      | 21 | 37043407 | 2 | 3.70736  |
| rs2051397      | SIM2      | 21 | 37043407 | 4 | 0.179945 |
| rs2051397      | SIM2      | 21 | 37043407 | 1 | 0.945234 |
| rs2051397      | SIM2      | 21 | 37043407 | 7 | 0.086056 |
| rs2051397      | SIM2      | 21 | 37043407 | 3 | 0.902059 |
| SNP21-37366751 | PIGP      | 21 | 37366751 | 5 | 0.020404 |
| SNP21-37366751 | PIGP      | 21 | 37366751 | 3 | 0.213902 |
| rs2298683      | PIGP      | 21 | 37366939 | 7 | 0.273228 |
| rs2298684      | PIGP      | 21 | 37366965 | 8 | 0.909893 |
| rs2298684      | PIGP      | 21 | 37366965 | 5 | 1.038227 |
| rs1053966      | TTC3      | 21 | 37489879 | 5 | 6.196176 |
| rs6579         | TTC3      | 21 | 37490178 | 8 | 0.411047 |
| rs13864        | DSCR9     | 21 | 37515490 | 4 | 1.378085 |
| rs13864        | DSCR9     | 21 | 37515490 | 8 | 0.230185 |
| rs2835727      | DYRK1A    | 21 | 37713543 | 7 | 5.024554 |
| rs2835728      | DYRK1A    | 21 | 37713633 | 5 | 0.43884  |
| rs13049514     | DYRK1A    | 21 | 37714001 | 3 | 0.896848 |
| rs13049514     | DYRK1A    | 21 | 37714001 | 5 | 0.840868 |
| rs13049514     | DYRK1A    | 21 | 37714001 | 8 | 0.092314 |
| rs13050229     | LOC441964 | 21 | 38566256 | 7 | 2.438066 |
| rs9963         | KCNJ15    | 21 | 38594494 | 2 | 4.979592 |
| rs1064273      | KCNJ15    | 21 | 38595169 | 5 | 0.686496 |
| rs1064273      | KCNJ15    | 21 | 38595169 | 7 | 1.577731 |
| rs1064273      | KCNJ15    | 21 | 38595169 | 4 | 1.47152  |
| rs1064273      | KCNJ15    | 21 | 38595169 | 2 | 2.393137 |
| rs2836660      | C21orf24  | 21 | 39045842 | 4 | 5.253378 |
| rs457705       | ETS2      | 21 | 39113301 | 8 | 0.671956 |

|            |           |    |          |   |          |
|------------|-----------|----|----------|---|----------|
| rs457705   | ETS2      | 21 | 39113301 | 4 | 1.07945  |
| rs9653664  | FLJ45139  | 21 | 39171837 | 5 | 1.056205 |
| rs9653664  | FLJ45139  | 21 | 39171837 | 1 | 0.439429 |
| rs9653664  | FLJ45139  | 21 | 39171837 | 8 | 0.078036 |
| rs2836722  | FLJ45139  | 21 | 39171878 | 5 | 1.879368 |
| rs2836722  | FLJ45139  | 21 | 39171878 | 8 | 0.730397 |
| rs2836722  | FLJ45139  | 21 | 39171878 | 7 | 0.477876 |
| rs2836722  | FLJ45139  | 21 | 39171878 | 1 | 1.066693 |
| rs2836725  | FLJ45139  | 21 | 39173584 | 8 | 2.299431 |
| rs2836725  | FLJ45139  | 21 | 39173584 | 2 | 3.08864  |
| rs2836725  | FLJ45139  | 21 | 39173584 | 7 | 4.322109 |
| rs2836725  | FLJ45139  | 21 | 39173584 | 1 | 2.413028 |
| rs992242   | FLJ45139  | 21 | 39173903 | 1 | 0.971063 |
| rs992243   | FLJ45139  | 21 | 39173997 | 1 | 0.619307 |
| rs1882777  | LOC391282 | 21 | 39421368 | 3 | 1.01534  |
| rs9305670  | PSMG1     | 21 | 39469257 | 3 | 0.394312 |
| rs2297255  | BRWD1     | 21 | 39479848 | 6 | 0.36883  |
| rs2836933  | BRWD1     | 21 | 39486072 | 3 | 1.016723 |
| rs2836933  | BRWD1     | 21 | 39486072 | 2 | 11.98566 |
| rs2836933  | BRWD1     | 21 | 39486072 | 8 | 0.367605 |
| rs2836933  | BRWD1     | 21 | 39486072 | 1 | 0.291481 |
| rs2836933  | BRWD1     | 21 | 39486072 | 4 | 1.066493 |
| rs1041439  | BRWD1     | 21 | 39493116 | 6 | 0.166831 |
| rs34613278 | HMG1      | 21 | 39642364 | 2 | 5.543127 |
| rs34613278 | HMG1      | 21 | 39642364 | 3 | 2.135181 |
| rs11558767 | LCA5L     | 21 | 39700052 | 5 | 7.707694 |
| rs11558767 | LCA5L     | 21 | 39700052 | 7 | 0.272994 |
| rs11558767 | LCA5L     | 21 | 39700052 | 1 | 2.494849 |
| rs2837029  | LCA5L     | 21 | 39722241 | 3 | 2.069963 |
| rs2837029  | LCA5L     | 21 | 39722241 | 8 | 0.703217 |
| rs2837029  | LCA5L     | 21 | 39722241 | 4 | 0.755933 |
| rs2837029  | LCA5L     | 21 | 39722241 | 2 | 5.249802 |
| rs2837034  | LCA5L     | 21 | 39729230 | 3 | 0.63635  |
| rs2837034  | LCA5L     | 21 | 39729230 | 4 | 0.927752 |
| rs2837034  | LCA5L     | 21 | 39729230 | 8 | 1.02945  |
| rs11575939 | SH3BGR    | 21 | 39745772 | 8 | 2.600432 |
| rs11575939 | SH3BGR    | 21 | 39745772 | 3 | 0.302941 |
| rs11575939 | SH3BGR    | 21 | 39745772 | 4 | 3.108069 |
| rs661650   | C21orf88  | 21 | 39891491 | 5 | 1.356498 |
| rs661650   | C21orf88  | 21 | 39891491 | 1 | 2.182635 |
| rs3746887  | B3GALT5   | 21 | 39954610 | 1 | 3.858142 |
| rs3746887  | B3GALT5   | 21 | 39954610 | 6 | 1.516773 |
| rs3746887  | B3GALT5   | 21 | 39954610 | 7 | 3.581759 |
| rs3746887  | B3GALT5   | 21 | 39954610 | 4 | 1.258794 |
| rs734413   | B3GALT5   | 21 | 39954674 | 1 | 3.843896 |
| rs734413   | B3GALT5   | 21 | 39954674 | 6 | 0.781248 |
| rs734413   | B3GALT5   | 21 | 39954674 | 7 | 1.703024 |



|               |           |    |          |   |          |
|---------------|-----------|----|----------|---|----------|
| rs734413      | B3GALT5   | 21 | 39954674 | 4 | 0.420529 |
| rs734412      | B3GALT5   | 21 | 39954932 | 4 | 3.856513 |
| rs734412      | B3GALT5   | 21 | 39954932 | 5 | 2.230592 |
| rs909182      | B3GALT5   | 21 | 39955686 | 1 | 3.004651 |
| rs909182      | B3GALT5   | 21 | 39955686 | 5 | 1.94111  |
| rs909182      | B3GALT5   | 21 | 39955686 | 6 | 0.082255 |
| rs909182      | B3GALT5   | 21 | 39955686 | 2 | 1.960117 |
| rs2837109     | B3GALT5   | 21 | 39956085 | 7 | 3.024134 |
| rs2837109     | B3GALT5   | 21 | 39956085 | 2 | 1.132764 |
| rs2837109     | B3GALT5   | 21 | 39956085 | 5 | 3.457889 |
| rs2837109     | B3GALT5   | 21 | 39956085 | 4 | 0.573508 |
| rs2205204     | IGSF5     | 21 | 40059377 | 2 | 1.685037 |
| rs2205204     | IGSF5     | 21 | 40059377 | 8 | 0.86064  |
| rs2837225     | IGSF5     | 21 | 40087332 | 7 | 2.291572 |
| rs16999204    | DSCAM     | 21 | 40337936 | 2 | 5.893862 |
| rs16999204    | DSCAM     | 21 | 40337936 | 5 | 1.035632 |
| rs2297270     | DSCAM     | 21 | 40647500 | 8 | 0.972174 |
| rs757368      | FAM3B     | 21 | 41651461 | 7 | 0.626718 |
| rs757368      | FAM3B     | 21 | 41651461 | 6 | 0.168836 |
| rs464138      | MX1       | 21 | 41720043 | 1 | 0.564913 |
| rs464138      | MX1       | 21 | 41720043 | 7 | 0.913577 |
| rs3787950     | TMPRSS2   | 21 | 41788166 | 6 | 0.081303 |
| rs3787950     | TMPRSS2   | 21 | 41788166 | 7 | 0.783122 |
| rs6586229     | C21orf129 | 21 | 42006214 | 5 | 2.668291 |
| rs6586229     | C21orf129 | 21 | 42006214 | 4 | 0.619785 |
| rs6586229     | C21orf129 | 21 | 42006214 | 3 | 1.41911  |
| rs6586229     | C21orf129 | 21 | 42006214 | 7 | 1.812789 |
| rs13050509    | RIPK4     | 21 | 42033326 | 1 | 4.86036  |
| rs13050509    | RIPK4     | 21 | 42033326 | 4 | 0.165104 |
| rs1054756     | LOC728766 | 21 | 42091933 | 1 | 5.625651 |
| rs9981428     | LOC728766 | 21 | 42093947 | 3 | 0.486823 |
| rs9981428     | LOC728766 | 21 | 42093947 | 8 | 5.901718 |
| rs2236693     | LOC728766 | 21 | 42094060 | 8 | 7.222055 |
| rs9983923     | LOC728766 | 21 | 42094180 | 3 | 0.426361 |
| rs2236694     | PRDM15    | 21 | 42094624 | 1 | 6.562256 |
| rs4075967     | PRDM15    | 21 | 42109245 | 1 | 0.546829 |
| rs4075967     | PRDM15    | 21 | 42109245 | 3 | 0.304714 |
| rs2839402     | C2CD2     | 21 | 42180969 | 1 | 4.421668 |
| rs2839402     | C2CD2     | 21 | 42180969 | 4 | 1.215989 |
| rs17177111    | C2CD2     | 21 | 42181439 | 3 | 0.848879 |
| rs17177111    | C2CD2     | 21 | 42181439 | 4 | 0.688985 |
| rs220111      | C21orf128 | 21 | 42397010 | 1 | 3.288335 |
| rs220111      | C21orf128 | 21 | 42397010 | 6 | 3.961671 |
| rs11701371    | C21orf128 | 21 | 42397041 | 7 | 2.662716 |
| SNP21-4240407 | UMODL1    | 21 | 42404077 | 6 | 1.876355 |
| rs220146      | UMODL1    | 21 | 42412362 | 3 | 0.559841 |
| rs220146      | UMODL1    | 21 | 42412362 | 1 | 0.687874 |

|            |         |    |          |   |          |
|------------|---------|----|----------|---|----------|
| rs220159   | UMODL1  | 21 | 42420942 | 2 | 0.575365 |
| rs220159   | UMODL1  | 21 | 42420942 | 1 | 1.219035 |
| rs220159   | UMODL1  | 21 | 42420942 | 8 | 1.123552 |
| rs220159   | UMODL1  | 21 | 42420942 | 4 | 0.329071 |
| rs3819141  | UMODL1  | 21 | 42430628 | 8 | 0.195358 |
| rs915842   | ABCG1   | 21 | 42552582 | 3 | 0.508932 |
| rs915843   | ABCG1   | 21 | 42552623 | 2 | 2.124485 |
| rs915843   | ABCG1   | 21 | 42552623 | 3 | 0.24545  |
| rs2156310  | TFF1    | 21 | 42659675 | 1 | 4.729375 |
| rs2839501  | TMPRSS3 | 21 | 42678706 | 4 | 1.440536 |
| rs2839501  | TMPRSS3 | 21 | 42678706 | 3 | 1.395608 |
| rs2277798  | UBASH3A | 21 | 42697175 | 3 | 1.197805 |
| rs13052676 | UBASH3A | 21 | 42725301 | 8 | 0.166732 |
| rs2839536  | RSPH1   | 21 | 42778956 | 3 | 1.070458 |
| rs2839536  | RSPH1   | 21 | 42778956 | 8 | 4.827988 |
| rs2839536  | RSPH1   | 21 | 42778956 | 1 | 5.412524 |
| rs2839536  | RSPH1   | 21 | 42778956 | 5 | 0.516546 |
| rs1573413  | RSPH1   | 21 | 42789408 | 8 | 2.081141 |
| rs1573413  | RSPH1   | 21 | 42789408 | 1 | 4.62875  |
| rs1573413  | RSPH1   | 21 | 42789408 | 3 | 1.927033 |
| rs1573413  | RSPH1   | 21 | 42789408 | 5 | 1.92449  |
| rs228104   | SLC37A1 | 21 | 42859024 | 4 | 0.038293 |
| rs2156316  | WDR4    | 21 | 43142894 | 5 | 4.164802 |
| rs2156316  | WDR4    | 21 | 43142894 | 7 | 6.465694 |
| rs15736    | WDR4    | 21 | 43146927 | 5 | 0.016132 |
| rs15736    | WDR4    | 21 | 43146927 | 7 | 0.358535 |
| rs2248490  | WDR4    | 21 | 43166813 | 4 | 0.868323 |
| rs2248490  | WDR4    | 21 | 43166813 | 5 | 0.585826 |
| rs2248490  | WDR4    | 21 | 43166813 | 7 | 0.586558 |
| rs10595    | NDUFV3  | 21 | 43197434 | 4 | 4.556444 |
| rs10595    | NDUFV3  | 21 | 43197434 | 5 | 2.704644 |
| rs10595    | NDUFV3  | 21 | 43197434 | 7 | 0.246309 |
| rs10595    | NDUFV3  | 21 | 43197434 | 6 | 1.098871 |
| rs10595    | NDUFV3  | 21 | 43197434 | 8 | 1.763103 |
| rs17179001 | PKNOX1  | 21 | 43324126 | 6 | 0.106629 |
| rs17179001 | PKNOX1  | 21 | 43324126 | 3 | 0.855308 |
| rs234736   | PKNOX1  | 21 | 43324981 | 8 | 3.524007 |
| rs234736   | PKNOX1  | 21 | 43324981 | 5 | 0.761018 |
| rs234736   | PKNOX1  | 21 | 43324981 | 2 | 4.036571 |
| rs2839628  | PKNOX1  | 21 | 43325937 | 8 | 0.030293 |
| rs2839628  | PKNOX1  | 21 | 43325937 | 6 | 6.98023  |
| rs2839628  | PKNOX1  | 21 | 43325937 | 3 | 0.521814 |
| rs234740   | PKNOX1  | 21 | 43326017 | 5 | 0.196406 |
| rs234740   | PKNOX1  | 21 | 43326017 | 2 | 4.072018 |
| rs1801181  | CBS     | 21 | 43353685 | 6 | 0.215847 |
| rs1801181  | CBS     | 21 | 43353685 | 3 | 0.092468 |
| rs1801181  | CBS     | 21 | 43353685 | 1 | 2.183872 |

|                |           |    |          |   |          |
|----------------|-----------|----|----------|---|----------|
| rs564779       | FLJ41733  | 21 | 43609850 | 2 | 0.192807 |
| rs564779       | FLJ41733  | 21 | 43609850 | 5 | 0.411437 |
| rs28510483     | SNF1LK    | 21 | 43663336 | 2 | 3.249763 |
| rs11088981     | C21orf125 | 21 | 43694578 | 2 | 0.724234 |
| rs2838304      | C21orf125 | 21 | 43697445 | 3 | 1.031845 |
| rs2838304      | C21orf125 | 21 | 43697445 | 7 | 0.431758 |
| rs2838304      | C21orf125 | 21 | 43697445 | 5 | 0.670729 |
| rs2838343      | HSF2BP    | 21 | 43902463 | 2 | 1.247691 |
| rs2838343      | HSF2BP    | 21 | 43902463 | 5 | 1.056612 |
| rs2838343      | HSF2BP    | 21 | 43902463 | 1 | 1.675488 |
| rs2838343      | HSF2BP    | 21 | 43902463 | 6 | 1.374373 |
| rs3204323      | PDXK      | 21 | 44005136 | 4 | 3.465141 |
| rs3194230      | PDXK      | 21 | 44005617 | 4 | 0.729936 |
| rs4566449      | RRP1      | 21 | 44043952 | 8 | 4.332622 |
| rs4566449      | RRP1      | 21 | 44043952 | 5 | 0.56321  |
| rs4566449      | RRP1      | 21 | 44043952 | 1 | 1.067612 |
| rs4566449      | RRP1      | 21 | 44043952 | 4 | 0.190629 |
| rs4566449      | RRP1      | 21 | 44043952 | 2 | 0.667285 |
| rs13847        | AGPAT3    | 21 | 44227248 | 1 | 5.438264 |
| rs2838476      | TMEM1     | 21 | 44304140 | 4 | 0.247055 |
| rs2187313      | PWP2      | 21 | 44369022 | 4 | 5.735649 |
| rs2838497      | C21orf33  | 21 | 44389194 | 4 | 0.476312 |
| rs4819388      | ICOSLG    | 21 | 44471849 | 2 | 1.443518 |
| rs4819388      | ICOSLG    | 21 | 44471849 | 6 | 3.813384 |
| rs4819388      | ICOSLG    | 21 | 44471849 | 1 | 0.189151 |
| rs15927        | ICOSLG    | 21 | 44472074 | 7 | 0.460608 |
| rs15927        | ICOSLG    | 21 | 44472074 | 1 | 4.671486 |
| SNP21-44481202 | ICOSLG    | 21 | 44481202 | 1 | 4.217488 |
| SNP21-44481202 | ICOSLG    | 21 | 44481202 | 6 | 4.264737 |
| SNP21-44481202 | ICOSLG    | 21 | 44481202 | 4 | 0.639944 |
| rs1055311      | AIRE      | 21 | 44533996 | 3 | 0.705167 |
| rs1055311      | AIRE      | 21 | 44533996 | 2 | 0.131515 |
| rs1800522      | AIRE      | 21 | 44541978 | 1 | 1.25634  |
| rs1800522      | AIRE      | 21 | 44541978 | 3 | 1.098836 |
| rs1800522      | AIRE      | 21 | 44541978 | 5 | 0.55664  |
| rs1057037      | PFKL      | 21 | 44558295 | 4 | 3.996035 |
| rs1057037      | PFKL      | 21 | 44558295 | 1 | 4.540667 |
| rs1556314      | TRPM2     | 21 | 44635771 | 7 | 0.987044 |
| rs1556314      | TRPM2     | 21 | 44635771 | 5 | 0.319185 |
| SNP21-44644624 | TRPM2     | 21 | 44644624 | 3 | 0.114784 |
| rs3804034      | LRR3      | 21 | 44703065 | 6 | 2.953092 |
| rs3804034      | LRR3      | 21 | 44703065 | 1 | 0.471262 |
| rs3804034      | LRR3      | 21 | 44703065 | 3 | 0.560562 |
| rs3804034      | LRR3      | 21 | 44703065 | 5 | 0.436065 |
| rs12483730     | KRTAP12-2 | 21 | 44910885 | 3 | 1.780036 |
| rs12483730     | KRTAP12-2 | 21 | 44910885 | 1 | 2.447822 |
| rs235314       | PTTG1IP   | 21 | 45095880 | 2 | 6.524337 |

|                |           |    |          |   |          |
|----------------|-----------|----|----------|---|----------|
| rs235373       | PTTG1IP   | 21 | 45118120 | 7 | 0.577884 |
| rs5030671      | ITGB2     | 21 | 45137870 | 1 | 4.365287 |
| rs11088969     | ITGB2     | 21 | 45155102 | 8 | 3.224064 |
| rs11088969     | ITGB2     | 21 | 45155102 | 7 | 5.317015 |
| rs2070947      | ITGB2     | 21 | 45165271 | 5 | 0.297784 |
| rs2070947      | ITGB2     | 21 | 45165271 | 3 | 2.798037 |
| rs2070947      | ITGB2     | 21 | 45165271 | 8 | 0.542921 |
| rs13048147     | LOC728004 | 21 | 45241889 | 5 | 0.676723 |
| rs13048147     | LOC728004 | 21 | 45241889 | 7 | 1.613577 |
| rs2255774      | POFUT2    | 21 | 45508279 | 5 | 0.659352 |
| rs2255774      | POFUT2    | 21 | 45508279 | 3 | 0.881908 |
| rs2255774      | POFUT2    | 21 | 45508279 | 1 | 4.233137 |
| rs2256000      | POFUT2    | 21 | 45510337 | 5 | 0.183503 |
| rs2256000      | POFUT2    | 21 | 45510337 | 1 | 2.946824 |
| rs6518220      | POFUT2    | 21 | 45510922 | 6 | 0.33749  |
| rs6518220      | POFUT2    | 21 | 45510922 | 1 | 4.197015 |
| rs6518220      | POFUT2    | 21 | 45510922 | 5 | 0.355218 |
| rs6518220      | POFUT2    | 21 | 45510922 | 7 | 0.773498 |
| rs6518220      | POFUT2    | 21 | 45510922 | 4 | 0.256982 |
| rs2838861      | POFUT2    | 21 | 45511047 | 5 | 0.536416 |
| rs2838861      | POFUT2    | 21 | 45511047 | 1 | 5.876377 |
| rs2838862      | POFUT2    | 21 | 45511154 | 5 | 4.158053 |
| rs2838862      | POFUT2    | 21 | 45511154 | 1 | 4.119353 |
| rs2297285      | POFUT2    | 21 | 45530049 | 1 | 0.386999 |
| rs2297285      | POFUT2    | 21 | 45530049 | 5 | 5.548378 |
| rs2297285      | POFUT2    | 21 | 45530049 | 3 | 0.575296 |
| rs6518223      | C21orf86  | 21 | 45538977 | 1 | 2.616377 |
| rs7282557      | C21orf86  | 21 | 45539014 | 7 | 1.854304 |
| rs7282557      | C21orf86  | 21 | 45539014 | 3 | 0.710054 |
| rs11701479     | C21orf123 | 21 | 45665756 | 5 | 0.815921 |
| rs11701479     | C21orf123 | 21 | 45665756 | 8 | 0.267613 |
| rs2236451      | COL18A1   | 21 | 45700511 | 3 | 0.357329 |
| rs2236451      | COL18A1   | 21 | 45700511 | 5 | 0.15311  |
| rs2230688      | COL18A1   | 21 | 45720740 | 3 | 0.380753 |
| rs11702425     | COL18A1   | 21 | 45732783 | 5 | 0.952612 |
| rs11702425     | COL18A1   | 21 | 45732783 | 2 | 1.47516  |
| rs11702425     | COL18A1   | 21 | 45732783 | 8 | 1.383011 |
| rs11702425     | COL18A1   | 21 | 45732783 | 6 | 1.398264 |
| SNP21-45734638 | COL18A1   | 21 | 45734638 | 6 | 1.871785 |
| rs12483761     | COL18A1   | 21 | 45751917 | 5 | 0.487495 |
| rs12483761     | COL18A1   | 21 | 45751917 | 8 | 0.068643 |
| rs12483761     | COL18A1   | 21 | 45751917 | 6 | 0.025635 |
| rs2838952      | COL18A1   | 21 | 45754591 | 7 | 0.180822 |
| rs12659        | SLC19A1   | 21 | 45775984 | 2 | 3.476315 |
| rs12659        | SLC19A1   | 21 | 45775984 | 4 | 3.014532 |
| rs1051266      | SLC19A1   | 21 | 45782222 | 4 | 4.683443 |
| rs11089032     | PCBP3     | 21 | 46186498 | 3 | 0.306321 |

|                |          |    |          |   |          |
|----------------|----------|----|----------|---|----------|
| rs11089032     | PCBP3    | 21 | 46186498 | 4 | 1.399494 |
| rs11089032     | PCBP3    | 21 | 46186498 | 5 | 2.015105 |
| rs11089032     | PCBP3    | 21 | 46186498 | 2 | 5.128708 |
| rs438651       | PCBP3    | 21 | 46186652 | 7 | 0.57961  |
| rs438651       | PCBP3    | 21 | 46186652 | 4 | 1.372394 |
| rs438651       | PCBP3    | 21 | 46186652 | 2 | 3.409871 |
| rs1980982      | COL6A1   | 21 | 46235359 | 7 | 0.686637 |
| rs1980982      | COL6A1   | 21 | 46235359 | 8 | 0.436643 |
| rs1980982      | COL6A1   | 21 | 46235359 | 1 | 1.68571  |
| rs1980982      | COL6A1   | 21 | 46235359 | 6 | 0.137187 |
| SNP21-46356884 | COL6A2   | 21 | 46356884 | 4 | 0.251964 |
| rs2839110      | COL6A2   | 21 | 46363388 | 3 | 0.139858 |
| rs2839110      | COL6A2   | 21 | 46363388 | 1 | 0.087152 |
| rs1044598      | COL6A2   | 21 | 46374057 | 5 | 7.174942 |
| rs1044598      | COL6A2   | 21 | 46374057 | 4 | 5.16249  |
| rs1044598      | COL6A2   | 21 | 46374057 | 1 | 0.093093 |
| rs1044598      | COL6A2   | 21 | 46374057 | 6 | 0.7931   |
| rs1044598      | COL6A2   | 21 | 46374057 | 3 | 0.177005 |
| rs1044598      | COL6A2   | 21 | 46374057 | 2 | 4.101614 |
| rs6652         | COL6A2   | 21 | 46376813 | 5 | 0.329746 |
| rs2839173      | MCM3AP   | 21 | 46501139 | 7 | 1.180873 |
| rs2839173      | MCM3AP   | 21 | 46501139 | 3 | 1.555114 |
| rs2839173      | MCM3AP   | 21 | 46501139 | 1 | 1.093571 |
| rs2839173      | MCM3AP   | 21 | 46501139 | 2 | 0.971664 |
| rs2839173      | MCM3AP   | 21 | 46501139 | 5 | 1.012678 |
| rs2839173      | MCM3AP   | 21 | 46501139 | 8 | 0.212774 |
| rs2839173      | MCM3AP   | 21 | 46501139 | 6 | 1.206703 |
| rs2839173      | MCM3AP   | 21 | 46501139 | 4 | 1.231151 |
| rs11702450     | MCM3AP   | 21 | 46528077 | 3 | 0.842224 |
| rs11702450     | MCM3AP   | 21 | 46528077 | 6 | 2.933093 |
| rs11702450     | MCM3AP   | 21 | 46528077 | 8 | 0.273931 |
| rs11702450     | MCM3AP   | 21 | 46528077 | 5 | 1.552064 |
| rs8651         | C21orf57 | 21 | 46542044 | 4 | 1.878477 |
| rs8651         | C21orf57 | 21 | 46542044 | 1 | 3.135845 |
| rs3747007      | C21orf58 | 21 | 46546167 | 4 | 0.336418 |
| rs3747007      | C21orf58 | 21 | 46546167 | 6 | 0.003492 |
| rs3747007      | C21orf58 | 21 | 46546167 | 1 | 3.289102 |
| SNP21-46559087 | C21orf58 | 21 | 46559087 | 6 | 0.741576 |
| SNP21-46559087 | C21orf58 | 21 | 46559087 | 1 | 0.127133 |
| SNP21-46559087 | C21orf58 | 21 | 46559087 | 5 | 7.19026  |
| SNP21-46559087 | C21orf58 | 21 | 46559087 | 3 | 0.457644 |
| SNP21-46559087 | C21orf58 | 21 | 46559087 | 7 | 0.4145   |
| SNP21-46559087 | C21orf58 | 21 | 46559087 | 4 | 6.727478 |
| SNP21-46559087 | C21orf58 | 21 | 46559087 | 2 | 0.32146  |
| rs2249060      | PCNT     | 21 | 46597605 | 1 | 6.246057 |
| SNP21-46601491 | PCNT     | 21 | 46601491 | 1 | 4.492834 |
| rs2839227      | PCNT     | 21 | 46610952 | 1 | 2.543272 |

|                |        |    |          |   |          |
|----------------|--------|----|----------|---|----------|
| rs2839228      | PCNT   | 21 | 46611245 | 1 | 6.792461 |
| SNP21-46611430 | PCNT   | 21 | 46611430 | 1 | 6.404511 |
| SNP21-46633107 | PCNT   | 21 | 46633107 | 1 | 4.517654 |
| rs3737438      | PCNT   | 21 | 46635700 | 7 | 1.043613 |
| rs3737438      | PCNT   | 21 | 46635700 | 5 | 0.244535 |
| rs3737438      | PCNT   | 21 | 46635700 | 3 | 2.297959 |
| SNP21-46655937 | PCNT   | 21 | 46655937 | 2 | 3.82375  |
| SNP21-46660634 | PCNT   | 21 | 46660634 | 4 | 0.76465  |
| SNP21-46660634 | PCNT   | 21 | 46660634 | 3 | 0.018976 |
| SNP21-46660634 | PCNT   | 21 | 46660634 | 2 | 0.229044 |
| SNP21-46660634 | PCNT   | 21 | 46660634 | 5 | 6.351503 |
| SNP21-46660634 | PCNT   | 21 | 46660634 | 7 | 4.981382 |
| SNP21-46660634 | PCNT   | 21 | 46660634 | 1 | 1.266436 |
| SNP21-46660823 | PCNT   | 21 | 46660823 | 2 | 4.468485 |
| SNP21-46660975 | PCNT   | 21 | 46660975 | 2 | 0.185134 |
| SNP21-46661081 | PCNT   | 21 | 46661081 | 6 | 0.153233 |
| SNP21-46661081 | PCNT   | 21 | 46661081 | 5 | 0.762455 |
| SNP21-46661081 | PCNT   | 21 | 46661081 | 7 | 0.666536 |
| SNP21-46661081 | PCNT   | 21 | 46661081 | 3 | 0.510273 |
| rs2839256      | PCNT   | 21 | 46672887 | 2 | 3.428488 |
| rs2070426      | PCNT   | 21 | 46674912 | 3 | 0.703104 |
| rs7279002      | DIP2A  | 21 | 46734951 | 7 | 0.487342 |
| rs7279002      | DIP2A  | 21 | 46734951 | 3 | 0.609998 |
| rs7279002      | DIP2A  | 21 | 46734951 | 5 | 0.334207 |
| rs7283507      | DIP2A  | 21 | 46743090 | 6 | 0.852623 |
| rs4818845      | DIP2A  | 21 | 46790444 | 6 | 0.042272 |
| rs2248636      | DIP2A  | 21 | 46810083 | 3 | 0.456485 |
| rs9722         | S100B  | 21 | 46843667 | 3 | 0.521014 |
| rs9722         | S100B  | 21 | 46843667 | 5 | 0.527051 |
| rs2277829      | PRMT2  | 21 | 46880030 | 3 | 0.873226 |
| rs9605145      | XKR3   | 22 | 15644904 | 6 | 0.254721 |
| rs9605145      | XKR3   | 22 | 15644904 | 7 | 1.544321 |
| rs9605146      | XKR3   | 22 | 15645194 | 6 | 0.768377 |
| rs7287116      | GAB4   | 22 | 15823131 | 5 | 2.047658 |
| rs1024732      | GAB4   | 22 | 15823381 | 3 | 0.299434 |
| rs917864       | IL17RA | 22 | 15945932 | 4 | 2.964171 |
| rs917864       | IL17RA | 22 | 15945932 | 6 | 6.560655 |
| rs917864       | IL17RA | 22 | 15945932 | 5 | 0.013859 |
| rs879577       | IL17RA | 22 | 15969209 | 4 | 0.246643 |
| rs879577       | IL17RA | 22 | 15969209 | 1 | 0.618226 |
| rs879575       | IL17RA | 22 | 15969567 | 1 | 3.439289 |
| rs9605220      | CECR6  | 22 | 15980148 | 5 | 0.938407 |
| rs9605220      | CECR6  | 22 | 15980148 | 1 | 2.2561   |
| rs35665085     | CECR5  | 22 | 16005915 | 2 | 4.308209 |
| rs7285896      | CECR1  | 22 | 16041791 | 2 | 2.486618 |
| rs2231495      | CECR1  | 22 | 16049306 | 3 | 0.249202 |
| rs2231495      | CECR1  | 22 | 16049306 | 1 | 4.930678 |

|                |           |    |          |   |          |
|----------------|-----------|----|----------|---|----------|
| rs9180         | SLC25A18  | 22 | 16453568 | 2 | 1.55108  |
| rs9180         | SLC25A18  | 22 | 16453568 | 1 | 1.987753 |
| rs1044497      | SLC25A18  | 22 | 16453592 | 7 | 0.630464 |
| rs1044497      | SLC25A18  | 22 | 16453592 | 5 | 8.542692 |
| rs7414         | ATP6V1E1  | 22 | 16455053 | 7 | 0.225129 |
| rs5992807      | BCL2L13   | 22 | 16590822 | 7 | 6.627595 |
| rs1045588      | MICAL3    | 22 | 16651078 | 8 | 6.65441  |
| rs9617630      | LOC729269 | 22 | 16734766 | 8 | 0.8058   |
| rs12484657     | PEX26     | 22 | 16946288 | 5 | 0.851526 |
| SNP22-16951008 | PEX26     | 22 | 16951008 | 6 | 6.858168 |
| SNP22-16951008 | PEX26     | 22 | 16951008 | 5 | 0.444264 |
| SNP22-16951008 | PEX26     | 22 | 16951008 | 4 | 0.315232 |
| SNP22-16951008 | PEX26     | 22 | 16951008 | 1 | 0.121046 |
| SNP22-16951008 | PEX26     | 22 | 16951008 | 2 | 2.178226 |
| rs362203       | TUBA8     | 22 | 16989642 | 4 | 4.561559 |
| rs4819756      | PRODH     | 22 | 17292678 | 3 | 2.66157  |
| rs4819756      | PRODH     | 22 | 17292678 | 4 | 3.639536 |
| rs4819756      | PRODH     | 22 | 17292678 | 5 | 2.886141 |
| rs2008720      | PRODH     | 22 | 17303745 | 3 | 0.581517 |
| rs1052756      | NULL      | 22 | 17499686 | 5 | 4.054991 |
| rs2240111      | DGCR14    | 22 | 17502665 | 5 | 5.139634 |
| rs8141941      | SLC25A1   | 22 | 17546263 | 2 | 4.059361 |
| rs8141941      | SLC25A1   | 22 | 17546263 | 4 | 2.22045  |
| rs8141941      | SLC25A1   | 22 | 17546263 | 5 | 0.895868 |
| rs1061325      | CLTCL1    | 22 | 17564095 | 6 | 6.104856 |
| rs712952       | CLTCL1    | 22 | 17577949 | 5 | 1.750681 |
| rs712952       | CLTCL1    | 22 | 17577949 | 4 | 6.244509 |
| rs712952       | CLTCL1    | 22 | 17577949 | 6 | 0.334814 |
| rs1210690      | HIRA      | 22 | 17698622 | 7 | 0.190331 |
| rs2073730      | UFD1L     | 22 | 17817946 | 6 | 5.505392 |
| rs2073730      | UFD1L     | 22 | 17817946 | 1 | 5.918333 |
| rs2073730      | UFD1L     | 22 | 17817946 | 7 | 0.452052 |
| rs2073730      | UFD1L     | 22 | 17817946 | 3 | 0.345503 |
| rs2073730      | UFD1L     | 22 | 17817946 | 5 | 0.119056 |
| rs4141527      | CDC45L    | 22 | 17847717 | 5 | 0.10192  |
| rs885985       | CLDN5     | 22 | 17891925 | 3 | 0.149196 |
| rs41298814     | TBX1      | 22 | 18130773 | 6 | 1.106582 |
| rs41298814     | TBX1      | 22 | 18130773 | 1 | 1.151196 |
| rs41298814     | TBX1      | 22 | 18130773 | 7 | 0.077416 |
| rs2301558      | TBX1      | 22 | 18131829 | 1 | 0.205086 |
| rs2301558      | TBX1      | 22 | 18131829 | 7 | 0.982076 |
| rs2301558      | TBX1      | 22 | 18131829 | 4 | 2.736495 |
| rs2301558      | TBX1      | 22 | 18131829 | 3 | 0.002413 |
| rs4819522      | TBX1      | 22 | 18146782 | 3 | 1.090834 |
| rs5746826      | TBX1      | 22 | 18147051 | 3 | 0.536165 |
| rs2073770      | GNB1L     | 22 | 18169541 | 6 | 0.195046 |
| rs2073770      | GNB1L     | 22 | 18169541 | 1 | 3.35254  |

|            |           |    |          |   |          |
|------------|-----------|----|----------|---|----------|
| rs5748449  | GNB1L     | 22 | 18188769 | 1 | 4.184691 |
| rs5748449  | GNB1L     | 22 | 18188769 | 8 | 0.220362 |
| rs5748449  | GNB1L     | 22 | 18188769 | 3 | 0.126641 |
| rs13164    | C22orf29  | 22 | 18213926 | 5 | 0.160177 |
| rs13164    | C22orf29  | 22 | 18213926 | 3 | 0.032677 |
| rs13164    | C22orf29  | 22 | 18213926 | 1 | 5.413935 |
| rs13164    | C22orf29  | 22 | 18213926 | 6 | 0.510714 |
| rs13057910 | C22orf29  | 22 | 18222285 | 2 | 4.156151 |
| rs1139795  | TXNRD2    | 22 | 18247771 | 2 | 3.567594 |
| rs11541479 | TXNRD2    | 22 | 18286511 | 3 | 0.882997 |
| rs5748470  | TXNRD2    | 22 | 18287118 | 5 | 0.967155 |
| rs5748470  | TXNRD2    | 22 | 18287118 | 3 | 1.391452 |
| rs4680     | COMT      | 22 | 18331271 | 6 | 0.181062 |
| rs4680     | COMT      | 22 | 18331271 | 5 | 0.419797 |
| rs4680     | COMT      | 22 | 18331271 | 7 | 1.301701 |
| rs165815   | ARVCF     | 22 | 18339473 | 5 | 0.326621 |
| rs2073747  | ARVCF     | 22 | 18349075 | 6 | 0.092871 |
| rs2073747  | ARVCF     | 22 | 18349075 | 1 | 1.484456 |
| rs2073747  | ARVCF     | 22 | 18349075 | 3 | 1.959325 |
| rs2240717  | ARVCF     | 22 | 18349106 | 7 | 1.437533 |
| rs415520   | C22orf25  | 22 | 18432532 | 7 | 2.24281  |
| rs415520   | C22orf25  | 22 | 18432532 | 6 | 5.964427 |
| rs415520   | C22orf25  | 22 | 18432532 | 8 | 7.636832 |
| rs415520   | C22orf25  | 22 | 18432532 | 3 | 0.071547 |
| rs415520   | C22orf25  | 22 | 18432532 | 1 | 5.334173 |
| rs2286928  | DGCR8     | 22 | 18478521 | 3 | 0.070287 |
| rs8137258  | LOC388849 | 22 | 18515961 | 3 | 0.567799 |
| rs8137258  | LOC388849 | 22 | 18515961 | 1 | 0.016021 |
| rs8137258  | LOC388849 | 22 | 18515961 | 7 | 0.816926 |
| rs8137258  | LOC388849 | 22 | 18515961 | 6 | 1.557831 |
| rs1319199  | SCARF2    | 22 | 19109563 | 5 | 0.055357 |
| rs520698   | LOC729495 | 22 | 19354880 | 7 | 1.12103  |
| rs520698   | LOC729495 | 22 | 19354880 | 3 | 1.500644 |
| rs4675     | SERPIND1  | 22 | 19471300 | 4 | 0.730158 |
| rs4675     | SERPIND1  | 22 | 19471300 | 3 | 0.554021 |
| rs4675     | SERPIND1  | 22 | 19471300 | 6 | 0.213701 |
| rs737894   | CRKL      | 22 | 19634408 | 4 | 0.284225 |
| rs1548410  | CRKL      | 22 | 19634463 | 4 | 6.247652 |
| rs81027    | LOC728351 | 22 | 19641531 | 4 | 0.104303 |
| rs7292968  | AIFM3     | 22 | 19665559 | 4 | 4.529129 |
| rs7292968  | AIFM3     | 22 | 19665559 | 8 | 5.229692 |
| rs2075269  | THAP7     | 22 | 19686029 | 4 | 2.124308 |
| rs2075269  | THAP7     | 22 | 19686029 | 2 | 2.441153 |
| rs398577   | MGC16703  | 22 | 19692849 | 3 | 0.691946 |
| rs1548411  | P2RXL1    | 22 | 19707301 | 5 | 0.034947 |
| rs1548411  | P2RXL1    | 22 | 19707301 | 7 | 1.092317 |
| rs1548411  | P2RXL1    | 22 | 19707301 | 3 | 0.958874 |



|                |         |    |          |   |          |
|----------------|---------|----|----------|---|----------|
| rs1548411      | P2RXL1  | 22 | 19707301 | 1 | 1.040742 |
| rs2541953      | P2RXL1  | 22 | 19711646 | 1 | 0.722478 |
| rs2541953      | P2RXL1  | 22 | 19711646 | 7 | 1.46272  |
| rs2541953      | P2RXL1  | 22 | 19711646 | 3 | 0.53276  |
| rs2541953      | P2RXL1  | 22 | 19711646 | 2 | 0.478366 |
| rs2541954      | P2RXL1  | 22 | 19711682 | 3 | 0.234118 |
| rs2541954      | P2RXL1  | 22 | 19711682 | 7 | 1.286414 |
| rs2541954      | P2RXL1  | 22 | 19711682 | 1 | 0.65073  |
| rs3179909      | P2RXL1  | 22 | 19712167 | 3 | 0.371725 |
| rs2072549      | SLC7A4  | 22 | 19715843 | 4 | 0.367167 |
| rs2072549      | SLC7A4  | 22 | 19715843 | 1 | 3.227066 |
| rs2072549      | SLC7A4  | 22 | 19715843 | 5 | 1.174947 |
| rs402931       | SLC7A4  | 22 | 19715985 | 1 | 1.406689 |
| rs402931       | SLC7A4  | 22 | 19715985 | 7 | 0.771298 |
| rs402931       | SLC7A4  | 22 | 19715985 | 3 | 0.489093 |
| rs2072551      | SLC7A4  | 22 | 19716112 | 1 | 1.721478 |
| rs2072551      | SLC7A4  | 22 | 19716112 | 5 | 0.816704 |
| rs464694       | HIC2    | 22 | 20131489 | 5 | 0.686665 |
| rs464694       | HIC2    | 22 | 20131489 | 7 | 1.163216 |
| rs464694       | HIC2    | 22 | 20131489 | 3 | 1.080428 |
| GA017812       | UBE2L3  | 22 | 20307047 | 3 | 0.440356 |
| GA017812       | UBE2L3  | 22 | 20307047 | 4 | 0.857227 |
| rs861854       | CCDC116 | 22 | 20318524 | 6 | 2.077011 |
| rs861854       | CCDC116 | 22 | 20318524 | 7 | 0.604424 |
| rs861854       | CCDC116 | 22 | 20318524 | 1 | 1.475162 |
| rs861854       | CCDC116 | 22 | 20318524 | 5 | 1.140607 |
| SNP22-20321072 | CCDC116 | 22 | 20321072 | 6 | 1.207441 |
| SNP22-20321072 | CCDC116 | 22 | 20321072 | 1 | 2.350312 |
| SNP22-20321072 | CCDC116 | 22 | 20321072 | 7 | 0.777074 |
| SNP22-20321072 | CCDC116 | 22 | 20321072 | 5 | 1.049557 |
| SNP22-20379783 | PPIL2   | 22 | 20379783 | 4 | 1.685982 |
| rs1045681      | YPEL1   | 22 | 20382814 | 3 | 0.088193 |
| rs1045681      | YPEL1   | 22 | 20382814 | 1 | 2.058637 |
| rs1045681      | YPEL1   | 22 | 20382814 | 5 | 0.302435 |
| rs1045681      | YPEL1   | 22 | 20382814 | 6 | 0.623494 |
| rs3747094      | YPEL1   | 22 | 20383880 | 5 | 0.256345 |
| rs3747094      | YPEL1   | 22 | 20383880 | 6 | 4.282007 |
| rs3747094      | YPEL1   | 22 | 20383880 | 4 | 4.931351 |
| rs3747094      | YPEL1   | 22 | 20383880 | 3 | 0.429802 |
| rs3747094      | YPEL1   | 22 | 20383880 | 1 | 3.903618 |
| rs1860         | YPEL1   | 22 | 20385394 | 5 | 4.641898 |
| rs1860         | YPEL1   | 22 | 20385394 | 3 | 1.57639  |
| rs1860         | YPEL1   | 22 | 20385394 | 1 | 4.875971 |
| rs1860         | YPEL1   | 22 | 20385394 | 6 | 0.94086  |
| rs1860         | YPEL1   | 22 | 20385394 | 4 | 4.986163 |
| rs6928         | MAPK1   | 22 | 20445004 | 3 | 0.04113  |
| rs6928         | MAPK1   | 22 | 20445004 | 7 | 1.020009 |

|                |          |    |          |   |          |
|----------------|----------|----|----------|---|----------|
| rs2070506      | PPM1F    | 22 | 20607307 | 1 | 4.22197  |
| rs9610728      | TOP3B    | 22 | 20648538 | 7 | 1.247528 |
| rs239927       | TOP3B    | 22 | 20660082 | 3 | 0.362478 |
| rs1805058      | GNAZ     | 22 | 21768191 | 1 | 2.727147 |
| rs1051875      | GNAZ     | 22 | 21796031 | 5 | 2.210798 |
| rs1051875      | GNAZ     | 22 | 21796031 | 3 | 1.179802 |
| rs4822360      | RTDR1    | 22 | 21812460 | 5 | 0.959237 |
| rs4822360      | RTDR1    | 22 | 21812460 | 3 | 1.949912 |
| SNP22-21833170 | RAB36    | 22 | 21833170 | 1 | 4.22116  |
| SNP22-21833170 | RAB36    | 22 | 21833170 | 6 | 0.753044 |
| rs737820       | RAB36    | 22 | 21833870 | 1 | 5.574878 |
| rs2008176      | RAB36    | 22 | 21835398 | 1 | 1.825625 |
| rs2008176      | RAB36    | 22 | 21835398 | 6 | 0.38118  |
| rs2003752      | FLJ31568 | 22 | 22072105 | 8 | 0.893753 |
| rs2003752      | FLJ31568 | 22 | 22072105 | 1 | 0.069359 |
| rs2003752      | FLJ31568 | 22 | 22072105 | 2 | 3.375995 |
| rs5751713      | Rgr      | 22 | 22363466 | 8 | 6.563554 |
| rs738786       | Rgr      | 22 | 22364288 | 8 | 3.48186  |
| rs738786       | Rgr      | 22 | 22364288 | 2 | 3.238479 |
| rs738786       | Rgr      | 22 | 22364288 | 6 | 0.380763 |
| rs738786       | Rgr      | 22 | 22364288 | 5 | 3.17959  |
| rs2070446      | Rgr      | 22 | 22365970 | 8 | 1.648138 |
| rs2070446      | Rgr      | 22 | 22365970 | 2 | 4.153563 |
| rs2070446      | Rgr      | 22 | 22365970 | 5 | 0.056848 |
| rs1007298      | Rgr      | 22 | 22368847 | 8 | 2.074371 |
| rs1007298      | Rgr      | 22 | 22368847 | 2 | 3.262731 |
| rs1007298      | Rgr      | 22 | 22368847 | 5 | 0.222148 |
| rs17630135     | ZNF70    | 22 | 22415252 | 6 | 0.563342 |
| rs2298375      | C22orf15 | 22 | 22436448 | 8 | 0.098941 |
| rs140181       | C22orf15 | 22 | 22436674 | 1 | 1.27453  |
| rs140181       | C22orf15 | 22 | 22436674 | 5 | 0.021351 |
| rs179468       | C22orf16 | 22 | 22439774 | 2 | 0.244869 |
| rs179468       | C22orf16 | 22 | 22439774 | 3 | 0.318501 |
| rs179468       | C22orf16 | 22 | 22439774 | 1 | 0.191895 |
| rs179468       | C22orf16 | 22 | 22439774 | 4 | 0.799914 |
| rs5760061      | DERL3    | 22 | 22508279 | 7 | 0.938193 |
| rs5760061      | DERL3    | 22 | 22508279 | 3 | 0.995011 |
| rs5760062      | DERL3    | 22 | 22508590 | 7 | 0.46184  |
| rs5760062      | DERL3    | 22 | 22508590 | 3 | 0.729519 |
| rs1128127      | DERL3    | 22 | 22509132 | 8 | 0.10303  |
| rs16986337     | SLC2A11  | 22 | 22529704 | 7 | 2.076299 |
| rs16986337     | SLC2A11  | 22 | 22529704 | 5 | 0.473161 |
| SNP22-22556890 | SLC2A11  | 22 | 22556890 | 7 | 0.566031 |
| rs1622002      | GSTT2B   | 22 | 22630580 | 2 | 1.763664 |
| rs1622002      | GSTT2B   | 22 | 22630580 | 4 | 0.647342 |
| rs7288201      | GGTLA1   | 22 | 22951293 | 4 | 0.482008 |
| rs2275984      | GGTLA1   | 22 | 22952648 | 1 | 1.007722 |

|                |         |    |          |   |          |
|----------------|---------|----|----------|---|----------|
| rs2275984      | GGTLA1  | 22 | 22952648 | 8 | 0.702051 |
| rs2275984      | GGTLA1  | 22 | 22952648 | 2 | 1.369244 |
| SNP22-22970666 | GGT5    | 22 | 22970666 | 5 | 0.999931 |
| SNP22-22970666 | GGT5    | 22 | 22970666 | 3 | 0.085386 |
| SNP22-22970666 | GGT5    | 22 | 22970666 | 1 | 0.764475 |
| SNP22-22970666 | GGT5    | 22 | 22970666 | 8 | 1.928098 |
| rs3747113      | SPECC1L | 22 | 23047518 | 1 | 5.747331 |
| rs3747114      | SPECC1L | 22 | 23141667 | 5 | 6.786511 |
| rs3747114      | SPECC1L | 22 | 23141667 | 3 | 2.042505 |
| rs3747114      | SPECC1L | 22 | 23141667 | 7 | 5.036058 |
| rs3747114      | SPECC1L | 22 | 23141667 | 6 | 0.113834 |
| rs7678         | SPECC1L | 22 | 23143165 | 7 | 0.08193  |
| rs3176991      | SNRPD3  | 22 | 23294128 | 2 | 3.774524 |
| rs3176991      | SNRPD3  | 22 | 23294128 | 7 | 0.907179 |
| rs11703684     | PIWIL3  | 22 | 23474912 | 7 | 2.400704 |
| rs11703684     | PIWIL3  | 22 | 23474912 | 5 | 2.468797 |
| rs9624586      | TOP1P2  | 22 | 23490785 | 1 | 3.125689 |
| rs9624586      | TOP1P2  | 22 | 23490785 | 7 | 1.476117 |
| rs5760637      | PIWIL3  | 22 | 23500297 | 3 | 0.28954  |
| rs9624633      | SGSM1   | 22 | 23600455 | 4 | 0.752592 |
| rs9624633      | SGSM1   | 22 | 23600455 | 5 | 0.360047 |
| rs5760738      | SGSM1   | 22 | 23650371 | 4 | 0.523002 |
| rs5760738      | SGSM1   | 22 | 23650371 | 2 | 1.519472 |
| rs5760738      | SGSM1   | 22 | 23650371 | 1 | 1.223836 |
| rs5760738      | SGSM1   | 22 | 23650371 | 7 | 0.200699 |
| rs5996792      | SGSM1   | 22 | 23650738 | 7 | 0.16705  |
| rs5996792      | SGSM1   | 22 | 23650738 | 1 | 1.32413  |
| rs5996792      | SGSM1   | 22 | 23650738 | 2 | 2.010172 |
| rs5996792      | SGSM1   | 22 | 23650738 | 4 | 2.998389 |
| rs5996793      | SGSM1   | 22 | 23650814 | 4 | 5.573857 |
| rs5996793      | SGSM1   | 22 | 23650814 | 1 | 1.080309 |
| rs5996793      | SGSM1   | 22 | 23650814 | 7 | 0.241699 |
| rs5760739      | SGSM1   | 22 | 23651787 | 1 | 0.892087 |
| rs5760739      | SGSM1   | 22 | 23651787 | 4 | 0.394441 |
| rs5760739      | SGSM1   | 22 | 23651787 | 2 | 1.341635 |
| rs5760739      | SGSM1   | 22 | 23651787 | 7 | 0.910338 |
| rs13054858     | NULL    | 22 | 23754579 | 3 | 0.552387 |
| rs12168578     | NULL    | 22 | 23903431 | 5 | 1.683644 |
| rs133201       | LRP5L   | 22 | 24087268 | 1 | 3.298269 |
| SNP22-24487068 | MYO18B  | 22 | 24487068 | 3 | 1.466982 |
| rs13058434     | MYO18B  | 22 | 24494413 | 2 | 2.170836 |
| rs738643       | MYO18B  | 22 | 24524045 | 6 | 0.760246 |
| rs17704912     | MYO18B  | 22 | 24561312 | 3 | 0.415261 |
| rs17704912     | MYO18B  | 22 | 24561312 | 7 | 0.508512 |
| rs5761268      | MYO18B  | 22 | 24569850 | 7 | 0.419651 |
| rs2236005      | MYO18B  | 22 | 24752980 | 8 | 0.832305 |
| rs2014410      | HPS4    | 22 | 25190269 | 5 | 0.10924  |

|                |         |    |          |   |          |
|----------------|---------|----|----------|---|----------|
| rs2014410      | HPS4    | 22 | 25190269 | 7 | 0.582441 |
| rs2014410      | HPS4    | 22 | 25190269 | 6 | 0.428372 |
| rs9613187      | HPS4    | 22 | 25205370 | 3 | 1.224769 |
| rs9613187      | HPS4    | 22 | 25205370 | 5 | 1.925183 |
| rs9613187      | HPS4    | 22 | 25205370 | 6 | 0.829276 |
| rs1045523      | SRRD    | 22 | 25217829 | 4 | 2.924552 |
| rs3213558      | TFIP11  | 22 | 25238433 | 8 | 1.069436 |
| rs3213558      | TFIP11  | 22 | 25238433 | 5 | 0.273025 |
| rs3213558      | TFIP11  | 22 | 25238433 | 6 | 0.120484 |
| rs3213558      | TFIP11  | 22 | 25238433 | 1 | 5.175751 |
| rs17476776     | MN1     | 22 | 26475605 | 5 | 0.43082  |
| rs1062731      | PITPNB  | 22 | 26578840 | 6 | 6.057669 |
| rs470098       | TTC28   | 22 | 26707083 | 3 | 0.655864 |
| rs470101       | TTC28   | 22 | 26719453 | 3 | 0.45018  |
| rs9625408      | TTC28   | 22 | 26834183 | 3 | 1.341038 |
| SNP22-27512169 | CCDC117 | 22 | 27512169 | 3 | 0.547285 |
| rs12321        | ZNRF3   | 22 | 27783193 | 2 | 0.039709 |
| rs12321        | ZNRF3   | 22 | 27783193 | 8 | 0.019664 |
| rs132280       | KREMEN1 | 22 | 27870920 | 3 | 0.965475 |
| rs132280       | KREMEN1 | 22 | 27870920 | 8 | 0.82266  |
| rs465736       | RFPL1   | 22 | 28164766 | 2 | 1.133009 |
| rs465736       | RFPL1   | 22 | 28164766 | 1 | 1.228814 |
| rs465736       | RFPL1   | 22 | 28164766 | 3 | 0.46232  |
| rs16987627     | RFPL1   | 22 | 28165060 | 4 | 0.440103 |
| rs16987627     | RFPL1   | 22 | 28165060 | 8 | 0.274587 |
| rs5763240      | RFPL1S  | 22 | 28166926 | 1 | 1.550083 |
| rs5763240      | RFPL1S  | 22 | 28166926 | 4 | 0.826787 |
| rs5763240      | RFPL1S  | 22 | 28166926 | 3 | 0.397672 |
| rs3804076      | RFPL1   | 22 | 28167537 | 6 | 8.632973 |
| rs3804076      | RFPL1   | 22 | 28167537 | 7 | 0.316715 |
| rs3804076      | RFPL1   | 22 | 28167537 | 3 | 0.631663 |
| rs3804076      | RFPL1   | 22 | 28167537 | 1 | 4.26742  |
| rs3804076      | RFPL1   | 22 | 28167537 | 5 | 0.405072 |
| rs3804076      | RFPL1   | 22 | 28167537 | 8 | 1.381248 |
| rs1049534      | THOC5   | 22 | 28238072 | 7 | 0.171628 |
| rs737976       | THOC5   | 22 | 28243272 | 4 | 0.040586 |
| rs737976       | THOC5   | 22 | 28243272 | 5 | 0.470138 |
| rs737976       | THOC5   | 22 | 28243272 | 7 | 0.369701 |
| rs469189       | THOC5   | 22 | 28279509 | 1 | 0.769102 |
| rs469189       | THOC5   | 22 | 28279509 | 2 | 0.568916 |
| rs469189       | THOC5   | 22 | 28279509 | 4 | 4.10886  |
| rs8140096      | NF2     | 22 | 28421765 | 2 | 3.035624 |
| rs2530680      | NF2     | 22 | 28421999 | 3 | 0.122954 |
| rs5997507      | CABP7   | 22 | 28455596 | 5 | 1.692595 |
| rs28265        | ASCC2   | 22 | 28530761 | 8 | 4.91979  |
| rs28265        | ASCC2   | 22 | 28530761 | 3 | 0.06011  |
| rs11549795     | ASCC2   | 22 | 28551120 | 3 | 0.572889 |

|                |           |    |          |   |          |
|----------------|-----------|----|----------|---|----------|
| rs41173        | NULL      | 22 | 28754863 | 1 | 1.056392 |
| rs41173        | NULL      | 22 | 28754863 | 2 | 1.010924 |
| rs737812       | LIF       | 22 | 28969110 | 6 | 0.443961 |
| rs737812       | LIF       | 22 | 28969110 | 5 | 0.362811 |
| rs4823086      | TBC1D10A  | 22 | 29018659 | 3 | 0.744876 |
| rs10376        | SF3A1     | 22 | 29058356 | 2 | 5.914762 |
| rs740222       | LOC550631 | 22 | 29091940 | 1 | 1.200393 |
| rs740222       | LOC550631 | 22 | 29091940 | 5 | 0.545219 |
| rs740222       | LOC550631 | 22 | 29091940 | 3 | 0.261011 |
| rs740223       | LOC550631 | 22 | 29092140 | 1 | 5.648201 |
| rs740223       | LOC550631 | 22 | 29092140 | 3 | 0.498009 |
| rs740223       | LOC550631 | 22 | 29092140 | 5 | 0.207976 |
| SNP22-29101554 | LOC550631 | 22 | 29101554 | 2 | 4.909579 |
| rs2286442      | LOC550631 | 22 | 29102686 | 1 | 4.405575 |
| rs2286442      | LOC550631 | 22 | 29102686 | 4 | 0.572841 |
| rs2286442      | LOC550631 | 22 | 29102686 | 7 | 0.726585 |
| rs2286442      | LOC550631 | 22 | 29102686 | 5 | 0.843287 |
| rs5997629      | RNF215    | 22 | 29112089 | 1 | 2.336077 |
| rs5997629      | RNF215    | 22 | 29112089 | 7 | 0.302419 |
| rs757660       | SEC14L2   | 22 | 29123137 | 8 | 0.610008 |
| rs757660       | SEC14L2   | 22 | 29123137 | 1 | 4.039234 |
| rs757660       | SEC14L2   | 22 | 29123137 | 5 | 0.068921 |
| rs757660       | SEC14L2   | 22 | 29123137 | 7 | 0.266928 |
| rs9606726      | MTP18     | 22 | 29153250 | 3 | 0.479618 |
| rs4820853      | SEC14L3   | 22 | 29194610 | 7 | 2.028617 |
| rs4820853      | SEC14L3   | 22 | 29194610 | 4 | 1.367941 |
| rs4820853      | SEC14L3   | 22 | 29194610 | 3 | 1.350164 |
| rs4820853      | SEC14L3   | 22 | 29194610 | 5 | 1.860511 |
| rs4820853      | SEC14L3   | 22 | 29194610 | 1 | 2.171484 |
| rs4820853      | SEC14L3   | 22 | 29194610 | 2 | 2.328941 |
| rs4820853      | SEC14L3   | 22 | 29194610 | 8 | 3.009247 |
| rs13750        | SEC14L4   | 22 | 29215100 | 6 | 0.285402 |
| rs17670808     | SEC14L4   | 22 | 29215980 | 6 | 1.607775 |
| SNP22-29218494 | SEC14L4   | 22 | 29218494 | 6 | 0.501782 |
| SNP22-29218494 | SEC14L4   | 22 | 29218494 | 5 | 0.264532 |
| rs9608956      | SEC14L4   | 22 | 29231592 | 5 | 0.802618 |
| rs5753190      | LOC730005 | 22 | 29264816 | 7 | 0.884425 |
| rs2267161      | GAL3ST1   | 22 | 29283295 | 3 | 1.425606 |
| rs2267161      | GAL3ST1   | 22 | 29283295 | 5 | 3.405359 |
| rs737953       | PES1      | 22 | 29317861 | 6 | 1.576175 |
| rs737953       | PES1      | 22 | 29317861 | 2 | 1.894368 |
| rs737953       | PES1      | 22 | 29317861 | 3 | 0.596455 |
| rs737953       | PES1      | 22 | 29317861 | 7 | 0.662792 |
| rs737953       | PES1      | 22 | 29317861 | 8 | 0.254545 |
| rs737953       | PES1      | 22 | 29317861 | 1 | 0.630161 |
| rs9606756      | TCN2      | 22 | 29336860 | 4 | 0.961182 |
| rs9606756      | TCN2      | 22 | 29336860 | 1 | 5.515628 |

|            |           |    |          |   |          |
|------------|-----------|----|----------|---|----------|
| rs9606756  | TCN2      | 22 | 29336860 | 3 | 1.041896 |
| rs1131603  | TCN2      | 22 | 29348975 | 1 | 4.117716 |
| rs4820889  | TCN2      | 22 | 29349044 | 4 | 0.272263 |
| rs9609038  | DUSP18    | 22 | 29388394 | 1 | 5.590133 |
| rs1005887  | DUSP18    | 22 | 29390029 | 1 | 3.865789 |
| rs1005887  | DUSP18    | 22 | 29390029 | 6 | 0.689506 |
| rs1005887  | DUSP18    | 22 | 29390029 | 4 | 6.574466 |
| rs1005887  | DUSP18    | 22 | 29390029 | 7 | 0.417188 |
| rs1005887  | DUSP18    | 22 | 29390029 | 3 | 0.176851 |
| rs11912792 | DUSP18    | 22 | 29393832 | 6 | 1.748481 |
| rs11912792 | DUSP18    | 22 | 29393832 | 1 | 5.249454 |
| rs2072132  | MORC2     | 22 | 29672376 | 2 | 2.397964 |
| rs2072132  | MORC2     | 22 | 29672376 | 4 | 0.193275 |
| rs2072132  | MORC2     | 22 | 29672376 | 6 | 4.750069 |
| rs2072132  | MORC2     | 22 | 29672376 | 7 | 0.409374 |
| rs737924   | MORC2     | 22 | 29684653 | 2 | 1.947495 |
| rs737924   | MORC2     | 22 | 29684653 | 4 | 2.290255 |
| rs2240431  | PIB5PA    | 22 | 29851850 | 4 | 0.655483 |
| rs2240431  | PIB5PA    | 22 | 29851850 | 5 | 0.013519 |
| rs2240431  | PIB5PA    | 22 | 29851850 | 1 | 3.529498 |
| rs757873   | PLA2G3    | 22 | 29860957 | 1 | 3.49578  |
| rs757873   | PLA2G3    | 22 | 29860957 | 4 | 1.214841 |
| rs757873   | PLA2G3    | 22 | 29860957 | 5 | 0.207475 |
| rs757873   | PLA2G3    | 22 | 29860957 | 7 | 0.725434 |
| rs740232   | PLA2G3    | 22 | 29861133 | 5 | 0.501848 |
| rs740232   | PLA2G3    | 22 | 29861133 | 3 | 0.216716 |
| rs740232   | PLA2G3    | 22 | 29861133 | 6 | 5.512427 |
| rs740232   | PLA2G3    | 22 | 29861133 | 2 | 3.342998 |
| rs740231   | PLA2G3    | 22 | 29861150 | 2 | 4.700364 |
| rs740231   | PLA2G3    | 22 | 29861150 | 7 | 0.434286 |
| rs740231   | PLA2G3    | 22 | 29861150 | 6 | 2.302272 |
| rs2232183  | PLA2G3    | 22 | 29862960 | 3 | 0.936143 |
| rs2232183  | PLA2G3    | 22 | 29862960 | 1 | 0.531874 |
| rs2232183  | PLA2G3    | 22 | 29862960 | 4 | 0.514958 |
| rs2074735  | PLA2G3    | 22 | 29865872 | 2 | 2.419485 |
| rs2232176  | PLA2G3    | 22 | 29866133 | 4 | 0.386003 |
| rs2232176  | PLA2G3    | 22 | 29866133 | 3 | 0.167088 |
| rs5997988  | EIF4ENIF1 | 22 | 30168085 | 6 | 3.127332 |
| rs5997988  | EIF4ENIF1 | 22 | 30168085 | 2 | 0.927053 |
| rs5997988  | EIF4ENIF1 | 22 | 30168085 | 3 | 0.386727 |
| rs5997988  | EIF4ENIF1 | 22 | 30168085 | 1 | 0.398486 |
| rs5997988  | EIF4ENIF1 | 22 | 30168085 | 4 | 3.640283 |
| rs12171042 | SFI1      | 22 | 30341225 | 1 | 3.721607 |
| rs5749334  | DEPDC5    | 22 | 30541412 | 3 | 0.484843 |
| rs5749334  | DEPDC5    | 22 | 30541412 | 4 | 0.494605 |
| rs5749334  | DEPDC5    | 22 | 30541412 | 5 | 0.557844 |
| rs5749334  | DEPDC5    | 22 | 30541412 | 1 | 2.814968 |

|                |           |    |          |   |          |
|----------------|-----------|----|----------|---|----------|
| rs17683011     | SLC5A1    | 22 | 30775946 | 1 | 0.66529  |
| rs17683430     | SLC5A1    | 22 | 30817700 | 1 | 4.161695 |
| rs17683448     | SLC5A1    | 22 | 30817744 | 1 | 5.202789 |
| rs136466       | RFPL2     | 22 | 30916632 | 1 | 0.397395 |
| rs136466       | RFPL2     | 22 | 30916632 | 5 | 1.015402 |
| rs136478       | RFPL2     | 22 | 30919023 | 5 | 0.183503 |
| rs136478       | RFPL2     | 22 | 30919023 | 2 | 1.590304 |
| rs136478       | RFPL2     | 22 | 30919023 | 1 | 0.599426 |
| SNP22-31086703 | RFPL3     | 22 | 31086703 | 5 | 2.841296 |
| SNP22-31086703 | RFPL3     | 22 | 31086703 | 1 | 2.570999 |
| rs5749409      | RFPL3     | 22 | 31086899 | 1 | 2.274584 |
| rs8136485      | FBXO7     | 22 | 31201227 | 1 | 0.715577 |
| rs8136485      | FBXO7     | 22 | 31201227 | 5 | 0.811596 |
| rs9621461      | FBXO7     | 22 | 31201365 | 7 | 0.815837 |
| rs9621461      | FBXO7     | 22 | 31201365 | 6 | 0.771558 |
| rs9621461      | FBXO7     | 22 | 31201365 | 2 | 0.939383 |
| rs8137714      | FBXO7     | 22 | 31201383 | 5 | 0.323504 |
| rs8137714      | FBXO7     | 22 | 31201383 | 1 | 2.761585 |
| rs8137714      | FBXO7     | 22 | 31201383 | 4 | 0.581291 |
| rs11912802     | SYN3      | 22 | 31239251 | 8 | 8.392834 |
| rs16992034     | LARGE     | 22 | 31999492 | 5 | 0.133987 |
| rs17722172     | LARGE     | 22 | 32000584 | 5 | 0.706406 |
| rs16992986     | LARGE     | 22 | 32487526 | 3 | 1.446968 |
| rs361668       | ISX       | 22 | 33793179 | 1 | 2.858563 |
| rs361668       | ISX       | 22 | 33793179 | 5 | 2.198577 |
| rs361668       | ISX       | 22 | 33793179 | 8 | 3.815051 |
| rs361668       | ISX       | 22 | 33793179 | 3 | 2.136755 |
| rs3810619      | ISX       | 22 | 33811776 | 1 | 1.355033 |
| rs2071747      | HMOX1     | 22 | 34107185 | 4 | 0.142945 |
| rs133427       | MCM5      | 22 | 34145880 | 7 | 7.896644 |
| rs5999860      | LOC730090 | 22 | 34252550 | 7 | 0.963501 |
| rs5999860      | LOC730090 | 22 | 34252550 | 1 | 2.176529 |
| rs5999860      | LOC730090 | 22 | 34252550 | 5 | 0.654974 |
| rs3747159      | RASD2     | 22 | 34278501 | 7 | 0.893822 |
| rs3747159      | RASD2     | 22 | 34278501 | 2 | 0.293273 |
| rs3747159      | RASD2     | 22 | 34278501 | 1 | 0.297794 |
| rs1476000      | LOC284912 | 22 | 34353386 | 2 | 1.658749 |
| rs1476000      | LOC284912 | 22 | 34353386 | 1 | 1.38948  |
| rs2076672      | APOL5     | 22 | 34453029 | 3 | 0.11605  |
| rs2076672      | APOL5     | 22 | 34453029 | 5 | 0.33802  |
| rs2076672      | APOL5     | 22 | 34453029 | 7 | 0.29477  |
| rs2076673      | APOL5     | 22 | 34454806 | 5 | 0.853578 |
| rs2076673      | APOL5     | 22 | 34454806 | 4 | 0.442106 |
| rs2076673      | APOL5     | 22 | 34454806 | 6 | 0.26572  |
| rs916334       | APOL3     | 22 | 34886910 | 1 | 0.903619 |
| rs916334       | APOL3     | 22 | 34886910 | 2 | 0.314611 |
| rs916334       | APOL3     | 22 | 34886910 | 3 | 0.045028 |

|                |          |    |          |   |          |
|----------------|----------|----|----------|---|----------|
| rs132655       | APOL3    | 22 | 34887496 | 3 | 1.126864 |
| rs6000172      | APOL4    | 22 | 34917148 | 3 | 0.703545 |
| rs6000173      | APOL4    | 22 | 34917169 | 3 | 0.455651 |
| rs6000173      | APOL4    | 22 | 34917169 | 2 | 1.075416 |
| rs6000174      | APOL4    | 22 | 34917225 | 3 | 1.849203 |
| rs6000174      | APOL4    | 22 | 34917225 | 2 | 3.713396 |
| rs6000174      | APOL4    | 22 | 34917225 | 7 | 2.285072 |
| rs2227167      | APOL4    | 22 | 34917432 | 3 | 2.270847 |
| rs2227168      | APOL4    | 22 | 34917457 | 3 | 0.811819 |
| rs132700       | APOL4    | 22 | 34917650 | 3 | 0.35464  |
| rs132700       | APOL4    | 22 | 34917650 | 1 | 0.222027 |
| rs132700       | APOL4    | 22 | 34917650 | 2 | 0.254486 |
| rs132700       | APOL4    | 22 | 34917650 | 7 | 1.279036 |
| rs2227169      | APOL4    | 22 | 34917898 | 3 | 0.249569 |
| rs2007468      | APOL4    | 22 | 34921326 | 4 | 2.584863 |
| rs2007468      | APOL4    | 22 | 34921326 | 3 | 2.93756  |
| rs2007468      | APOL4    | 22 | 34921326 | 1 | 3.808363 |
| rs2007468      | APOL4    | 22 | 34921326 | 2 | 3.373975 |
| rs2007468      | APOL4    | 22 | 34921326 | 7 | 3.430518 |
| rs132735       | APOL4    | 22 | 34927827 | 4 | 0.07349  |
| rs132735       | APOL4    | 22 | 34927827 | 2 | 0.14342  |
| rs9619597      | APOL2    | 22 | 34952768 | 1 | 4.760845 |
| rs7285167      | APOL2    | 22 | 34953866 | 1 | 5.54157  |
| rs2010499      | APOL2    | 22 | 34959412 | 7 | 1.397509 |
| rs2010499      | APOL2    | 22 | 34959412 | 2 | 3.730565 |
| rs2010499      | APOL2    | 22 | 34959412 | 3 | 0.371236 |
| rs2010499      | APOL2    | 22 | 34959412 | 8 | 7.998944 |
| rs6000220      | APOL1    | 22 | 34979912 | 7 | 1.02709  |
| SNP22-34991276 | APOL1    | 22 | 34991276 | 4 | 5.366132 |
| SNP22-34991276 | APOL1    | 22 | 34991276 | 3 | 8.758528 |
| SNP22-34991276 | APOL1    | 22 | 34991276 | 8 | 0.309333 |
| rs139999       | TXN2     | 22 | 35193321 | 3 | 0.295687 |
| rs3747163      | FOXRED2  | 22 | 35214972 | 3 | 0.251848 |
| rs3747163      | FOXRED2  | 22 | 35214972 | 8 | 7.063271 |
| rs9622410      | EIF3D    | 22 | 35251998 | 8 | 0.836807 |
| rs131837       | FLJ90680 | 22 | 35572291 | 4 | 2.461735 |
| rs131837       | FLJ90680 | 22 | 35572291 | 2 | 1.585948 |
| rs131837       | FLJ90680 | 22 | 35572291 | 6 | 1.547326 |
| rs5756370      | FLJ90680 | 22 | 35572422 | 7 | 0.226097 |
| rs5756370      | FLJ90680 | 22 | 35572422 | 1 | 0.317533 |
| rs5756370      | FLJ90680 | 22 | 35572422 | 5 | 1.222853 |
| rs131840       | CSF2RB   | 22 | 35663740 | 7 | 0.15626  |
| SNP22-35728147 | C22orf33 | 22 | 35728147 | 5 | 0.355907 |
| rs2235321      | TMPRSS6  | 22 | 35792872 | 7 | 1.861189 |
| rs2235321      | TMPRSS6  | 22 | 35792872 | 2 | 5.234126 |
| rs2235321      | TMPRSS6  | 22 | 35792872 | 4 | 1.552634 |
| rs2235321      | TMPRSS6  | 22 | 35792872 | 8 | 1.773462 |



|           |         |    |          |   |          |
|-----------|---------|----|----------|---|----------|
| rs855791  | TMPRSS6 | 22 | 35792882 | 7 | 0.858131 |
| rs855791  | TMPRSS6 | 22 | 35792882 | 4 | 0.725046 |
| rs2235324 | TMPRSS6 | 22 | 35815670 | 5 | 0.310523 |
| rs2235324 | TMPRSS6 | 22 | 35815670 | 8 | 3.184546 |
| rs228942  | IL2RB   | 22 | 35854565 | 7 | 1.108039 |
| rs229517  | C1QTNF6 | 22 | 35907683 | 7 | 0.135285 |
| rs229526  | C1QTNF6 | 22 | 35911368 | 6 | 1.845059 |
| rs229526  | C1QTNF6 | 22 | 35911368 | 1 | 5.354068 |
| rs229526  | C1QTNF6 | 22 | 35911368 | 8 | 6.503291 |
| rs229526  | C1QTNF6 | 22 | 35911368 | 7 | 4.823211 |
| rs229527  | C1QTNF6 | 22 | 35911431 | 6 | 0.201716 |
| rs229527  | C1QTNF6 | 22 | 35911431 | 1 | 3.917688 |
| rs2071710 | SSTR3   | 22 | 35932967 | 3 | 0.137433 |
| rs86582   | SSTR3   | 22 | 35933336 | 3 | 0.010729 |
| rs86582   | SSTR3   | 22 | 35933336 | 7 | 0.290272 |
| rs86583   | SSTR3   | 22 | 35933690 | 3 | 1.728727 |
| rs9610669 | SSTR3   | 22 | 35937927 | 2 | 2.914609 |
| rs6572    | RAC2    | 22 | 35951391 | 8 | 7.452381 |
| rs6572    | RAC2    | 22 | 35951391 | 3 | 0.103735 |
| rs6572    | RAC2    | 22 | 35951391 | 6 | 8.234414 |
| rs6572    | RAC2    | 22 | 35951391 | 4 | 0.039822 |
| rs6572    | RAC2    | 22 | 35951391 | 1 | 6.370974 |
| rs9610680 | RAC2    | 22 | 35951897 | 3 | 0.10883  |
| rs9610680 | RAC2    | 22 | 35951897 | 2 | 4.489462 |
| rs2239774 | RAC2    | 22 | 35967599 | 2 | 5.412861 |
| rs2239774 | RAC2    | 22 | 35967599 | 3 | 0.239815 |
| rs2239774 | RAC2    | 22 | 35967599 | 4 | 0.992476 |
| rs3213557 | PSCD4   | 22 | 36008511 | 5 | 1.587063 |
| rs3213557 | PSCD4   | 22 | 36008511 | 1 | 1.118057 |
| rs3203726 | PSCD4   | 22 | 36039959 | 7 | 1.181974 |
| rs3203726 | PSCD4   | 22 | 36039959 | 3 | 0.70007  |
| rs3203726 | PSCD4   | 22 | 36039959 | 6 | 0.795349 |
| rs3203727 | PSCD4   | 22 | 36040077 | 2 | 4.981956 |
| rs3203728 | PSCD4   | 22 | 36040123 | 6 | 0.558315 |
| rs3203728 | PSCD4   | 22 | 36040123 | 1 | 0.468504 |
| rs3203728 | PSCD4   | 22 | 36040123 | 7 | 1.109564 |
| rs3203728 | PSCD4   | 22 | 36040123 | 3 | 0.985661 |
| rs5750409 | PSCD4   | 22 | 36040241 | 4 | 1.446309 |
| rs5750409 | PSCD4   | 22 | 36040241 | 2 | 0.94707  |
| rs5750409 | PSCD4   | 22 | 36040241 | 6 | 5.326831 |
| rs5750409 | PSCD4   | 22 | 36040241 | 7 | 0.819383 |
| rs5750409 | PSCD4   | 22 | 36040241 | 1 | 1.593437 |
| rs5750409 | PSCD4   | 22 | 36040241 | 8 | 0.306033 |
| rs5750409 | PSCD4   | 22 | 36040241 | 3 | 1.255583 |
| rs2284051 | PSCD4   | 22 | 36040515 | 4 | 3.476804 |
| rs2284051 | PSCD4   | 22 | 36040515 | 7 | 1.167506 |
| rs2284051 | PSCD4   | 22 | 36040515 | 3 | 1.375382 |

|                |         |    |          |   |          |
|----------------|---------|----|----------|---|----------|
| rs2284051      | PSCD4   | 22 | 36040515 | 6 | 6.32315  |
| rs2284051      | PSCD4   | 22 | 36040515 | 1 | 0.836661 |
| rs2284051      | PSCD4   | 22 | 36040515 | 8 | 0.111607 |
| rs2284051      | PSCD4   | 22 | 36040515 | 2 | 1.803276 |
| rs15996        | PSCD4   | 22 | 36041024 | 3 | 0.242426 |
| rs15996        | PSCD4   | 22 | 36041024 | 6 | 1.329826 |
| rs15996        | PSCD4   | 22 | 36041024 | 2 | 0.580229 |
| rs15996        | PSCD4   | 22 | 36041024 | 8 | 1.079283 |
| rs15996        | PSCD4   | 22 | 36041024 | 1 | 0.145204 |
| rs15996        | PSCD4   | 22 | 36041024 | 7 | 0.053163 |
| rs15996        | PSCD4   | 22 | 36041024 | 4 | 0.856311 |
| rs1076934      | ELFN2   | 22 | 36096142 | 7 | 0.626066 |
| rs8142615      | ELFN2   | 22 | 36100012 | 7 | 3.43466  |
| rs8142615      | ELFN2   | 22 | 36100012 | 8 | 3.560552 |
| rs8142615      | ELFN2   | 22 | 36100012 | 6 | 0.274942 |
| rs2071856      | ELFN2   | 22 | 36100576 | 3 | 2.354819 |
| rs2071856      | ELFN2   | 22 | 36100576 | 7 | 1.256957 |
| rs2071856      | ELFN2   | 22 | 36100576 | 5 | 1.108882 |
| rs2071857      | ELFN2   | 22 | 36101104 | 7 | 1.470528 |
| rs2071857      | ELFN2   | 22 | 36101104 | 3 | 0.438945 |
| rs2071857      | ELFN2   | 22 | 36101104 | 5 | 0.261266 |
| rs4821653      | NULL    | 22 | 36101931 | 7 | 1.622675 |
| rs4821653      | NULL    | 22 | 36101931 | 3 | 1.528207 |
| rs3817805      | CARD10  | 22 | 36230708 | 8 | 0.094173 |
| rs3817805      | CARD10  | 22 | 36230708 | 1 | 3.481556 |
| SNP22-36376641 | SH3BP1  | 22 | 36376641 | 8 | 1.188877 |
| SNP22-36376641 | SH3BP1  | 22 | 36376641 | 7 | 0.243308 |
| SNP22-36381945 | SH3BP1  | 22 | 36381945 | 4 | 9.482065 |
| SNP22-36381945 | SH3BP1  | 22 | 36381945 | 7 | 0.055902 |
| rs9610841      | TRIOBP  | 22 | 36451098 | 4 | 1.130537 |
| rs9610841      | TRIOBP  | 22 | 36451098 | 1 | 5.422587 |
| rs7284476      | TRIOBP  | 22 | 36459278 | 1 | 0.582689 |
| rs8140207      | TRIOBP  | 22 | 36460405 | 8 | 1.323381 |
| rs8140207      | TRIOBP  | 22 | 36460405 | 4 | 0.59959  |
| rs8140207      | TRIOBP  | 22 | 36460405 | 1 | 1.494126 |
| rs3091367      | ANKRD54 | 22 | 36557767 | 1 | 4.895157 |
| rs3091367      | ANKRD54 | 22 | 36557767 | 7 | 0.285663 |
| rs3091367      | ANKRD54 | 22 | 36557767 | 4 | 0.841962 |
| rs2076371      | SLC16A8 | 22 | 36804642 | 8 | 0.488346 |
| rs2076371      | SLC16A8 | 22 | 36804642 | 3 | 0.898405 |
| rs2076371      | SLC16A8 | 22 | 36804642 | 1 | 0.504754 |
| rs2235573      | SLC16A8 | 22 | 36807876 | 3 | 1.375684 |
| rs2235573      | SLC16A8 | 22 | 36807876 | 7 | 0.436661 |
| rs2235573      | SLC16A8 | 22 | 36807876 | 8 | 1.454865 |
| rs2235573      | SLC16A8 | 22 | 36807876 | 1 | 3.879891 |
| rs11570768     | PLA2G6  | 22 | 36837927 | 6 | 5.023196 |
| rs11570597     | PLA2G6  | 22 | 36907701 | 7 | 1.20681  |

|                |           |    |          |   |          |
|----------------|-----------|----|----------|---|----------|
| rs2269608      | KCNJ4     | 22 | 37152467 | 6 | 1.147159 |
| rs2269608      | KCNJ4     | 22 | 37152467 | 3 | 0.932594 |
| rs2269608      | KCNJ4     | 22 | 37152467 | 1 | 5.476683 |
| rs196059       | KCNJ4     | 22 | 37153082 | 3 | 3.123494 |
| rs196059       | KCNJ4     | 22 | 37153082 | 5 | 1.10687  |
| rs2071887      | KDEL3     | 22 | 37208956 | 7 | 0.558286 |
| rs2071887      | KDEL3     | 22 | 37208956 | 2 | 4.173231 |
| rs2071887      | KDEL3     | 22 | 37208956 | 3 | 0.123927 |
| rs5757162      | LOC646851 | 22 | 37323316 | 4 | 1.423037 |
| rs5757162      | LOC646851 | 22 | 37323316 | 2 | 4.218731 |
| rs5757162      | LOC646851 | 22 | 37323316 | 3 | 0.952319 |
| rs5757162      | LOC646851 | 22 | 37323316 | 7 | 1.529961 |
| rs6001185      | LOC646851 | 22 | 37382101 | 2 | 3.32735  |
| rs6001185      | LOC646851 | 22 | 37382101 | 3 | 0.557693 |
| rs6001185      | LOC646851 | 22 | 37382101 | 7 | 1.107373 |
| rs5750669      | TOMM22    | 22 | 37410584 | 3 | 0.526419 |
| rs5750669      | TOMM22    | 22 | 37410584 | 7 | 0.693129 |
| rs5750669      | TOMM22    | 22 | 37410584 | 2 | 5.391488 |
| rs5750669      | TOMM22    | 22 | 37410584 | 4 | 3.257219 |
| SNP22-37477181 | UNC84B    | 22 | 37477181 | 4 | 2.676047 |
| rs7288826      | NPTXR     | 22 | 37544720 | 2 | 0.260524 |
| rs7288826      | NPTXR     | 22 | 37544720 | 7 | 2.617211 |
| rs7288826      | NPTXR     | 22 | 37544720 | 1 | 0.036806 |
| rs7288826      | NPTXR     | 22 | 37544720 | 5 | 0.86195  |
| rs2235135      | NPTXR     | 22 | 37546613 | 1 | 0.49053  |
| rs2235135      | NPTXR     | 22 | 37546613 | 4 | 0.196402 |
| rs8140217      | NPTXR     | 22 | 37547947 | 1 | 0.883033 |
| rs8140217      | NPTXR     | 22 | 37547947 | 5 | 1.529969 |
| rs8140217      | NPTXR     | 22 | 37547947 | 7 | 2.137494 |
| rs8140217      | NPTXR     | 22 | 37547947 | 2 | 1.08158  |
| rs5757299      | NPTXR     | 22 | 37552598 | 5 | 1.030271 |
| rs5757299      | NPTXR     | 22 | 37552598 | 4 | 0.698471 |
| rs5757299      | NPTXR     | 22 | 37552598 | 6 | 5.417735 |
| rs7584         | APOBEC3C  | 22 | 37744645 | 3 | 0.137644 |
| rs7584         | APOBEC3C  | 22 | 37744645 | 6 | 0.433421 |
| rs7584         | APOBEC3C  | 22 | 37744645 | 7 | 0.890817 |
| rs7584         | APOBEC3C  | 22 | 37744645 | 5 | 6.908636 |
| rs7584         | APOBEC3C  | 22 | 37744645 | 1 | 4.861861 |
| rs5750728      | APOBEC3F  | 22 | 37770095 | 7 | 1.878556 |
| rs5750728      | APOBEC3F  | 22 | 37770095 | 8 | 4.277114 |
| rs5750728      | APOBEC3F  | 22 | 37770095 | 4 | 2.32985  |
| rs139272       | LOC651158 | 22 | 37817611 | 6 | 1.02475  |
| rs139272       | LOC651158 | 22 | 37817611 | 7 | 1.230045 |
| rs139273       | LOC651158 | 22 | 37817665 | 7 | 2.097912 |
| rs139274       | LOC651158 | 22 | 37817668 | 3 | 1.477823 |
| rs139274       | LOC651158 | 22 | 37817668 | 7 | 0.357167 |
| rs139274       | LOC651158 | 22 | 37817668 | 4 | 1.898367 |

|                |           |    |          |   |          |
|----------------|-----------|----|----------|---|----------|
| rs139274       | LOC651158 | 22 | 37817668 | 1 | 5.822972 |
| rs139294       | APOBEC3H  | 22 | 37826358 | 4 | 2.022005 |
| rs139294       | APOBEC3H  | 22 | 37826358 | 1 | 2.957488 |
| rs139297       | APOBEC3H  | 22 | 37827350 | 4 | 0.36092  |
| rs139297       | APOBEC3H  | 22 | 37827350 | 1 | 4.680776 |
| rs139297       | APOBEC3H  | 22 | 37827350 | 3 | 0.319049 |
| rs139297       | APOBEC3H  | 22 | 37827350 | 7 | 0.383953 |
| rs139302       | APOBEC3H  | 22 | 37827984 | 1 | 6.297764 |
| rs139302       | APOBEC3H  | 22 | 37827984 | 4 | 0.469255 |
| rs139302       | APOBEC3H  | 22 | 37827984 | 7 | 3.029705 |
| rs139302       | APOBEC3H  | 22 | 37827984 | 3 | 0.377073 |
| rs139317       | APOBEC3H  | 22 | 37829848 | 7 | 0.09797  |
| rs139317       | APOBEC3H  | 22 | 37829848 | 3 | 0.757981 |
| rs139317       | APOBEC3H  | 22 | 37829848 | 1 | 5.71652  |
| rs139317       | APOBEC3H  | 22 | 37829848 | 4 | 0.756139 |
| rs710191       | CBX7      | 22 | 37857760 | 3 | 0.705948 |
| rs710191       | CBX7      | 22 | 37857760 | 5 | 0.496272 |
| rs710191       | CBX7      | 22 | 37857760 | 4 | 0.124683 |
| rs710191       | CBX7      | 22 | 37857760 | 7 | 0.558915 |
| rs139383       | CBX7      | 22 | 37857855 | 4 | 0.179907 |
| rs139383       | CBX7      | 22 | 37857855 | 3 | 0.181278 |
| rs139383       | CBX7      | 22 | 37857855 | 5 | 0.346725 |
| rs139384       | CBX7      | 22 | 37857881 | 4 | 0.59759  |
| rs139384       | CBX7      | 22 | 37857881 | 6 | 0.30495  |
| rs139384       | CBX7      | 22 | 37857881 | 7 | 5.486482 |
| rs139384       | CBX7      | 22 | 37857881 | 5 | 0.664346 |
| rs713841       | CBX7      | 22 | 37858975 | 6 | 2.794394 |
| rs713841       | CBX7      | 22 | 37858975 | 4 | 1.083172 |
| rs713841       | CBX7      | 22 | 37858975 | 5 | 0.560615 |
| rs11089928     | CBX7      | 22 | 37859375 | 4 | 6.496216 |
| rs1010170      | SYNGR1    | 22 | 38108273 | 4 | 1.040675 |
| rs1010170      | SYNGR1    | 22 | 38108273 | 2 | 4.71012  |
| rs1010170      | SYNGR1    | 22 | 38108273 | 3 | 1.213124 |
| rs5757650      | SYNGR1    | 22 | 38108365 | 4 | 3.452245 |
| rs5757650      | SYNGR1    | 22 | 38108365 | 3 | 1.057778 |
| rs1043395      | SYNGR1    | 22 | 38110907 | 4 | 6.15613  |
| rs2958651      | FAM83F    | 22 | 38735709 | 3 | 0.509329 |
| rs2958651      | FAM83F    | 22 | 38735709 | 8 | 0.059533 |
| rs2958651      | FAM83F    | 22 | 38735709 | 4 | 0.299245 |
| rs2958651      | FAM83F    | 22 | 38735709 | 2 | 3.767345 |
| SNP22-38882065 | TNRC6B    | 22 | 38882065 | 1 | 6.131509 |
| SNP22-38882065 | TNRC6B    | 22 | 38882065 | 8 | 2.063563 |
| SNP22-38882065 | TNRC6B    | 22 | 38882065 | 7 | 3.939839 |
| rs11703324     | TNRC6B    | 22 | 39061080 | 7 | 0.823449 |
| rs133072       | MCHR1     | 22 | 39405489 | 3 | 0.853383 |
| rs133072       | MCHR1     | 22 | 39405489 | 1 | 1.225244 |
| rs133073       | MCHR1     | 22 | 39405641 | 8 | 1.127093 |

|            |           |    |          |   |          |
|------------|-----------|----|----------|---|----------|
| rs133073   | MCHR1     | 22 | 39405641 | 5 | 1.435795 |
| rs133073   | MCHR1     | 22 | 39405641 | 3 | 1.757114 |
| rs133073   | MCHR1     | 22 | 39405641 | 4 | 1.378576 |
| rs133073   | MCHR1     | 22 | 39405641 | 1 | 2.086751 |
| rs4822002  | LOC730143 | 22 | 39817290 | 6 | 1.195295 |
| rs4822002  | LOC730143 | 22 | 39817290 | 5 | 1.982365 |
| rs4822002  | LOC730143 | 22 | 39817290 | 3 | 1.127752 |
| rs9611519  | L3MBTL2   | 22 | 39943134 | 3 | 0.414223 |
| rs71948    | RANGAP1   | 22 | 39975703 | 6 | 0.696384 |
| rs71948    | RANGAP1   | 22 | 39975703 | 5 | 0.062266 |
| rs71948    | RANGAP1   | 22 | 39975703 | 8 | 0.387414 |
| rs139509   | RANGAP1   | 22 | 39982679 | 1 | 3.613522 |
| rs139509   | RANGAP1   | 22 | 39982679 | 6 | 0.523212 |
| rs139509   | RANGAP1   | 22 | 39982679 | 3 | 0.468639 |
| rs139509   | RANGAP1   | 22 | 39982679 | 5 | 0.383309 |
| rs8139784  | RANGAP1   | 22 | 40011960 | 2 | 0.914614 |
| rs8139784  | RANGAP1   | 22 | 40011960 | 1 | 1.468887 |
| rs17365991 | TEF       | 22 | 40120125 | 3 | 0.480062 |
| rs1799932  | ACO2      | 22 | 40241471 | 1 | 0.224905 |
| rs139561   | MEI1      | 22 | 40525356 | 8 | 0.347772 |
| rs4822063  | SREBF2    | 22 | 40606688 | 2 | 4.37975  |
| rs11547820 | SREBF2    | 22 | 40623086 | 2 | 5.197741 |
| rs17848337 | SREBF2    | 22 | 40630894 | 2 | 0.804958 |
| rs710194   | 3-Sep     | 22 | 40722506 | 3 | 0.702131 |
| rs710194   | 3-Sep     | 22 | 40722506 | 4 | 1.674772 |
| rs710194   | 3-Sep     | 22 | 40722506 | 2 | 3.899446 |
| rs133335   | WBP2NL    | 22 | 40746002 | 3 | 1.632522 |
| rs133335   | WBP2NL    | 22 | 40746002 | 4 | 0.77084  |
| rs133335   | WBP2NL    | 22 | 40746002 | 2 | 2.164977 |
| rs2301521  | WBP2NL    | 22 | 40753056 | 3 | 0.040477 |
| rs2301521  | WBP2NL    | 22 | 40753056 | 4 | 7.001214 |
| rs11703233 | NAGA      | 22 | 40784533 | 2 | 1.64746  |
| rs13057094 | FAM109B   | 22 | 40800263 | 3 | 2.108105 |
| rs133383   | FAM109B   | 22 | 40803549 | 4 | 4.543477 |
| rs133383   | FAM109B   | 22 | 40803549 | 3 | 2.610231 |
| rs2269524  | C22orf32  | 22 | 40805649 | 4 | 0.516084 |
| rs2269524  | C22orf32  | 22 | 40805649 | 3 | 1.09317  |
| rs1801311  | NDUFA6    | 22 | 40816669 | 2 | 6.477137 |
| rs1801311  | NDUFA6    | 22 | 40816669 | 4 | 5.362729 |
| rs1801311  | NDUFA6    | 22 | 40816669 | 3 | 0.699111 |
| rs2743456  | CYP2D7P1  | 22 | 40866257 | 8 | 1.474566 |
| rs2743456  | CYP2D7P1  | 22 | 40866257 | 2 | 2.519329 |
| rs2743456  | CYP2D7P1  | 22 | 40866257 | 3 | 1.42794  |
| rs2743456  | CYP2D7P1  | 22 | 40866257 | 5 | 1.342818 |
| rs2743456  | CYP2D7P1  | 22 | 40866257 | 4 | 2.004915 |
| rs731026   | NFAM1     | 22 | 41109823 | 7 | 0.231048 |
| rs34963472 | NFAM1     | 22 | 41113014 | 7 | 0.45285  |

|                |           |    |          |   |          |
|----------------|-----------|----|----------|---|----------|
| rs5996153      | NFAM1     | 22 | 41123817 | 7 | 1.382951 |
| rs137057       | dJ22E13.2 | 22 | 41300459 | 1 | 3.294046 |
| rs137088       | POLDIP3   | 22 | 41311834 | 3 | 0.217911 |
| SNP22-41340761 | POLDIP3   | 22 | 41340761 | 3 | 0.619046 |
| rs9623659      | A4GALT    | 22 | 41418915 | 5 | 1.96563  |
| rs9623659      | A4GALT    | 22 | 41418915 | 1 | 0.682943 |
| rs9623659      | A4GALT    | 22 | 41418915 | 4 | 1.994302 |
| rs9623659      | A4GALT    | 22 | 41418915 | 6 | 1.156028 |
| rs9623659      | A4GALT    | 22 | 41418915 | 2 | 0.910835 |
| rs9607957      | ARFGAP3   | 22 | 41548341 | 2 | 2.298643 |
| rs5759013      | PACSIN2   | 22 | 41619417 | 5 | 1.31676  |
| rs5759013      | PACSIN2   | 22 | 41619417 | 3 | 0.311992 |
| rs5759013      | PACSIN2   | 22 | 41619417 | 2 | 2.294565 |
| rs5759013      | PACSIN2   | 22 | 41619417 | 7 | 0.688621 |
| rs5759125      | TTLL1     | 22 | 41785376 | 4 | 0.715033 |
| rs2076156      | TTLL1     | 22 | 41796161 | 4 | 2.476979 |
| rs2076161      | TTLL1     | 22 | 41796191 | 7 | 0.420677 |
| rs6003048      | TTLL1     | 22 | 41815329 | 8 | 0.620813 |
| rs6003048      | TTLL1     | 22 | 41815329 | 3 | 0.539381 |
| rs6003048      | TTLL1     | 22 | 41815329 | 1 | 1.965911 |
| rs13815        | MCAT      | 22 | 41859258 | 7 | 0.396883 |
| rs13815        | MCAT      | 22 | 41859258 | 4 | 8.1721   |
| rs8141806      | SCUBE1    | 22 | 41929944 | 5 | 0.243722 |
| rs34893532     | SCUBE1    | 22 | 41940050 | 1 | 2.280168 |
| rs9614382      | EFCAB6    | 22 | 42307729 | 7 | 0.98723  |
| rs9614382      | EFCAB6    | 22 | 42307729 | 8 | 1.167906 |
| rs137731       | EFCAB6    | 22 | 42362375 | 6 | 0.965839 |
| rs8141450      | EFCAB6    | 22 | 42410978 | 7 | 0.666518 |
| rs137794       | EFCAB6    | 22 | 42411013 | 5 | 0.440836 |
| rs137794       | EFCAB6    | 22 | 42411013 | 6 | 0.023744 |
| rs137794       | EFCAB6    | 22 | 42411013 | 2 | 4.103874 |
| rs5764214      | EFCAB6    | 22 | 42414775 | 4 | 0.271789 |
| rs5764214      | EFCAB6    | 22 | 42414775 | 3 | 1.617423 |
| rs5764214      | EFCAB6    | 22 | 42414775 | 7 | 0.341655 |
| SNP22-42509436 | EFCAB6    | 22 | 42509436 | 8 | 1.35986  |
| rs138057       | SULT4A1   | 22 | 42552580 | 5 | 0.431626 |
| rs138057       | SULT4A1   | 22 | 42552580 | 1 | 0.731523 |
| rs138129       | PNPLA5    | 22 | 42607438 | 7 | 0.956243 |
| rs138129       | PNPLA5    | 22 | 42607438 | 8 | 4.126164 |
| rs138129       | PNPLA5    | 22 | 42607438 | 3 | 0.668357 |
| rs138129       | PNPLA5    | 22 | 42607438 | 1 | 1.217501 |
| rs138129       | PNPLA5    | 22 | 42607438 | 4 | 1.792388 |
| rs138129       | PNPLA5    | 22 | 42607438 | 2 | 1.603799 |
| rs470093       | PNPLA5    | 22 | 42607504 | 4 | 1.137066 |
| rs470093       | PNPLA5    | 22 | 42607504 | 6 | 0.763935 |
| rs470093       | PNPLA5    | 22 | 42607504 | 3 | 0.403221 |
| rs2071884      | PNPLA5    | 22 | 42618395 | 5 | 0.831355 |

|                |                 |    |          |   |          |
|----------------|-----------------|----|----------|---|----------|
| rs2071884      | PNPLA5          | 22 | 42618395 | 7 | 0.848959 |
| rs2071884      | PNPLA5          | 22 | 42618395 | 1 | 1.262566 |
| SNP22-42654303 | PNPLA3          | 22 | 42654303 | 1 | 5.374588 |
| SNP22-42654303 | PNPLA3          | 22 | 42654303 | 7 | 0.413571 |
| rs2294920      | SAMM50          | 22 | 42682684 | 6 | 0.903606 |
| rs2294920      | SAMM50          | 22 | 42682684 | 1 | 3.987757 |
| rs3177036      | SAMM50          | 22 | 42699537 | 4 | 1.749985 |
| rs3177036      | SAMM50          | 22 | 42699537 | 2 | 0.66758  |
| rs6006604      | SAMM50          | 22 | 42717614 | 3 | 0.646139 |
| rs6006604      | SAMM50          | 22 | 42717614 | 2 | 1.559236 |
| rs6006604      | SAMM50          | 22 | 42717614 | 1 | 0.17365  |
| rs6006604      | SAMM50          | 22 | 42717614 | 4 | 0.410577 |
| rs6006604      | SAMM50          | 22 | 42717614 | 5 | 0.843484 |
| rs1007863      | PARVB           | 22 | 42726784 | 1 | 4.705874 |
| rs1007863      | PARVB           | 22 | 42726784 | 5 | 0.228602 |
| rs1007863      | PARVB           | 22 | 42726784 | 7 | 0.11724  |
| rs1007863      | PARVB           | 22 | 42726784 | 6 | 0.620622 |
| rs11090626     | LL22NC03-75B3.6 | 22 | 42971233 | 4 | 0.73205  |
| rs16991711     | LL22NC03-75B3.6 | 22 | 42974662 | 3 | 0.339247 |
| rs135388       | LL22NC03-75B3.6 | 22 | 43012945 | 1 | 1.225916 |
| rs135388       | LL22NC03-75B3.6 | 22 | 43012945 | 5 | 3.945334 |
| rs131154       | LDOC1L          | 22 | 43269509 | 3 | 0.502316 |
| rs131154       | LDOC1L          | 22 | 43269509 | 8 | 0.000847 |
| rs131154       | LDOC1L          | 22 | 43269509 | 5 | 0.421293 |
| rs131163       | LDOC1L          | 22 | 43270799 | 4 | 9.451654 |
| rs131163       | LDOC1L          | 22 | 43270799 | 5 | 0.967338 |
| rs131163       | LDOC1L          | 22 | 43270799 | 8 | 8.232332 |
| rs131163       | LDOC1L          | 22 | 43270799 | 3 | 1.490704 |
| rs1124898      | KRT18P23        | 22 | 43312547 | 5 | 2.107591 |
| rs138590       | KRT18P23        | 22 | 43341688 | 3 | 3.75587  |
| rs138590       | KRT18P23        | 22 | 43341688 | 7 | 3.47978  |
| rs138590       | KRT18P23        | 22 | 43341688 | 1 | 4.227715 |
| rs138593       | RP3-474I12.5    | 22 | 43343984 | 7 | 0.945947 |
| rs138593       | RP3-474I12.5    | 22 | 43343984 | 3 | 0.247254 |
| rs3213551      | PRR5            | 22 | 43512199 | 4 | 0.811857 |
| rs6007344      | ARHGAP8         | 22 | 43634301 | 3 | 0.037878 |
| rs6007344      | ARHGAP8         | 22 | 43634301 | 6 | 0.690265 |
| rs6007344      | ARHGAP8         | 22 | 43634301 | 4 | 0.037033 |
| rs6007344      | ARHGAP8         | 22 | 43634301 | 2 | 6.626181 |
| rs6007344      | ARHGAP8         | 22 | 43634301 | 8 | 2.85025  |
| rs2071763      | ARHGAP8         | 22 | 43637203 | 1 | 4.880259 |
| rs2071763      | ARHGAP8         | 22 | 43637203 | 3 | 0.192025 |
| rs2071764      | ARHGAP8         | 22 | 43637278 | 7 | 0.393314 |
| rs2071764      | ARHGAP8         | 22 | 43637278 | 3 | 1.125895 |
| rs2071764      | ARHGAP8         | 22 | 43637278 | 1 | 6.101618 |
| rs6519899      | ARHGAP8         | 22 | 43637314 | 5 | 0.327112 |
| rs6519899      | ARHGAP8         | 22 | 43637314 | 8 | 5.144756 |

|                |          |    |          |   |          |
|----------------|----------|----|----------|---|----------|
| rs5766149      | PHF21B   | 22 | 43656366 | 5 | 0.041601 |
| rs5766149      | PHF21B   | 22 | 43656366 | 3 | 0.227242 |
| rs762980       | PHF21B   | 22 | 43656773 | 4 | 1.972827 |
| rs762980       | PHF21B   | 22 | 43656773 | 3 | 3.774713 |
| rs762980       | PHF21B   | 22 | 43656773 | 5 | 1.625072 |
| rs3810628      | PHF21B   | 22 | 43657163 | 3 | 0.030425 |
| rs132875       | NUP50    | 22 | 43945576 | 6 | 0.611038 |
| rs132875       | NUP50    | 22 | 43945576 | 7 | 0.850697 |
| rs226524       | NUP50    | 22 | 43955895 | 7 | 0.786045 |
| rs226524       | NUP50    | 22 | 43955895 | 6 | 1.239098 |
| rs1043731      | C22orf9  | 22 | 43967041 | 2 | 2.978018 |
| rs1043731      | C22orf9  | 22 | 43967041 | 3 | 0.535685 |
| rs1043731      | C22orf9  | 22 | 43967041 | 5 | 0.163636 |
| rs1135360      | UPK3A    | 22 | 44063666 | 3 | 0.336773 |
| rs1135360      | UPK3A    | 22 | 44063666 | 5 | 0.566113 |
| rs1057356      | UPK3A    | 22 | 44070258 | 7 | 0.433752 |
| rs1057356      | UPK3A    | 22 | 44070258 | 3 | 1.394559 |
| rs1056322      | FAM118A  | 22 | 44115098 | 3 | 0.291943 |
| rs1056322      | FAM118A  | 22 | 44115098 | 6 | 7.236178 |
| rs1056322      | FAM118A  | 22 | 44115098 | 8 | 0.118479 |
| rs2064068      | FAM118A  | 22 | 44115149 | 3 | 0.643677 |
| rs2064068      | FAM118A  | 22 | 44115149 | 7 | 0.533291 |
| rs2064068      | FAM118A  | 22 | 44115149 | 6 | 6.099246 |
| rs3747238      | SMC1B    | 22 | 44118760 | 7 | 1.611008 |
| rs3747238      | SMC1B    | 22 | 44118760 | 3 | 0.742187 |
| rs3747239      | SMC1B    | 22 | 44118790 | 6 | 0.283214 |
| rs3747239      | SMC1B    | 22 | 44118790 | 3 | 0.619014 |
| rs3747239      | SMC1B    | 22 | 44118790 | 8 | 1.16223  |
| rs3747240      | SMC1B    | 22 | 44118888 | 8 | 0.885295 |
| rs2142661      | RIBC2    | 22 | 44200573 | 3 | 1.722556 |
| rs2142662      | RIBC2    | 22 | 44200599 | 8 | 2.07993  |
| rs2142662      | RIBC2    | 22 | 44200599 | 3 | 1.58176  |
| rs1022478      | RIBC2    | 22 | 44200620 | 7 | 5.434564 |
| rs1022478      | RIBC2    | 22 | 44200620 | 8 | 4.190371 |
| rs1022478      | RIBC2    | 22 | 44200620 | 3 | 1.884407 |
| rs1119         | FBLN1    | 22 | 44339948 | 5 | 0.358372 |
| rs1119         | FBLN1    | 22 | 44339948 | 6 | 3.738605 |
| rs1119         | FBLN1    | 22 | 44339948 | 4 | 1.250535 |
| rs1119         | FBLN1    | 22 | 44339948 | 1 | 6.012462 |
| rs9627391      | C22orf26 | 22 | 44825761 | 7 | 0.62988  |
| rs9627391      | C22orf26 | 22 | 44825761 | 1 | 3.480461 |
| rs7511013      | C22orf26 | 22 | 44825796 | 7 | 0.181862 |
| rs7511013      | C22orf26 | 22 | 44825796 | 8 | 3.553521 |
| rs7511013      | C22orf26 | 22 | 44825796 | 1 | 5.39115  |
| SNP22-44828555 | C22orf26 | 22 | 44828555 | 5 | 0.631368 |
| SNP22-44828555 | C22orf26 | 22 | 44828555 | 3 | 0.074777 |
| SNP22-44828555 | C22orf26 | 22 | 44828555 | 7 | 0.315281 |



|                |           |    |          |   |          |
|----------------|-----------|----|----------|---|----------|
| SNP22-44828555 | C22orf26  | 22 | 44828555 | 1 | 0.797318 |
| SNP22-44828555 | C22orf26  | 22 | 44828555 | 8 | 0.625694 |
| rs8135478      | FLJ27365  | 22 | 44860649 | 2 | 2.909561 |
| rs8135478      | FLJ27365  | 22 | 44860649 | 6 | 0.548986 |
| rs9615264      | PPARA     | 22 | 45011253 | 4 | 0.143809 |
| rs9615264      | PPARA     | 22 | 45011253 | 8 | 1.279125 |
| rs1055659      | PPARA     | 22 | 45016962 | 1 | 0.664967 |
| rs1055659      | PPARA     | 22 | 45016962 | 2 | 4.491777 |
| rs9627281      | LOC150383 | 22 | 45022832 | 1 | 0.402724 |
| rs9627281      | LOC150383 | 22 | 45022832 | 7 | 0.705929 |
| rs8135363      | PKDREJ    | 22 | 45030377 | 1 | 0.428498 |
| rs4508712      | PKDREJ    | 22 | 45031623 | 2 | 1.353178 |
| rs4508712      | PKDREJ    | 22 | 45031623 | 8 | 0.247116 |
| rs4508712      | PKDREJ    | 22 | 45031623 | 1 | 1.112178 |
| rs6007740      | PKDREJ    | 22 | 45032987 | 7 | 2.773847 |
| rs6007740      | PKDREJ    | 22 | 45032987 | 2 | 3.06833  |
| rs6007740      | PKDREJ    | 22 | 45032987 | 1 | 2.834852 |
| rs6008384      | PKDREJ    | 22 | 45034612 | 1 | 1.381097 |
| rs6008384      | PKDREJ    | 22 | 45034612 | 2 | 1.718997 |
| rs6008384      | PKDREJ    | 22 | 45034612 | 7 | 2.902398 |
| rs7291444      | PKDREJ    | 22 | 45034910 | 7 | 1.570808 |
| rs7291444      | PKDREJ    | 22 | 45034910 | 1 | 1.896419 |
| rs7291444      | PKDREJ    | 22 | 45034910 | 2 | 0.714832 |
| rs6519993      | PKDREJ    | 22 | 45035143 | 1 | 1.601282 |
| rs6519993      | PKDREJ    | 22 | 45035143 | 7 | 1.70974  |
| rs6519994      | PKDREJ    | 22 | 45035469 | 1 | 1.521714 |
| rs6519994      | PKDREJ    | 22 | 45035469 | 2 | 2.611752 |
| rs35883013     | FLJ20699  | 22 | 45059805 | 5 | 0.804831 |
| rs6008598      | GTSE1     | 22 | 45082907 | 2 | 0.169778 |
| rs6008598      | GTSE1     | 22 | 45082907 | 1 | 0.230277 |
| rs6008598      | GTSE1     | 22 | 45082907 | 7 | 1.186186 |
| rs6008684      | GTSE1     | 22 | 45097764 | 7 | 0.799582 |
| rs6008684      | GTSE1     | 22 | 45097764 | 1 | 0.279091 |
| rs6008684      | GTSE1     | 22 | 45097764 | 2 | 1.545219 |
| rs6008684      | GTSE1     | 22 | 45097764 | 5 | 0.08857  |
| rs9615949      | GTSE1     | 22 | 45101195 | 7 | 0.835572 |
| rs9615949      | GTSE1     | 22 | 45101195 | 1 | 1.058035 |
| rs6008729      | GTSE1     | 22 | 45106092 | 1 | 0.260069 |
| rs6008729      | GTSE1     | 22 | 45106092 | 2 | 0.204246 |
| rs6008729      | GTSE1     | 22 | 45106092 | 7 | 6.639506 |
| rs9615348      | GTSE1     | 22 | 45108002 | 1 | 0.413007 |
| rs9615348      | GTSE1     | 22 | 45108002 | 2 | 4.577433 |
| rs11090865     | TRMU      | 22 | 45110353 | 2 | 1.416243 |
| rs11090865     | TRMU      | 22 | 45110353 | 1 | 0.712194 |
| rs11090865     | TRMU      | 22 | 45110353 | 7 | 1.304255 |
| rs6007891      | CELSR1    | 22 | 45135497 | 3 | 0.41939  |
| rs6007891      | CELSR1    | 22 | 45135497 | 1 | 4.17879  |

|                |              |    |          |   |          |
|----------------|--------------|----|----------|---|----------|
| rs6007891      | CELSR1       | 22 | 45135497 | 7 | 4.002978 |
| SNP22-45138750 | CELSR1       | 22 | 45138750 | 4 | 0.572254 |
| SNP22-45138750 | CELSR1       | 22 | 45138750 | 1 | 5.278499 |
| SNP22-45138750 | CELSR1       | 22 | 45138750 | 3 | 0.701874 |
| SNP22-45138750 | CELSR1       | 22 | 45138750 | 7 | 0.163439 |
| SNP22-45139145 | CELSR1       | 22 | 45139145 | 3 | 0.140683 |
| SNP22-45139145 | CELSR1       | 22 | 45139145 | 4 | 0.8608   |
| SNP22-45139145 | CELSR1       | 22 | 45139145 | 7 | 9.470546 |
| SNP22-45139145 | CELSR1       | 22 | 45139145 | 5 | 0.28268  |
| SNP22-45139145 | CELSR1       | 22 | 45139145 | 1 | 10.18617 |
| rs4044210      | CELSR1       | 22 | 45164979 | 7 | 1.04686  |
| rs4044210      | CELSR1       | 22 | 45164979 | 3 | 0.183916 |
| rs4044210      | CELSR1       | 22 | 45164979 | 1 | 5.885251 |
| SNP22-45208041 | CELSR1       | 22 | 45208041 | 5 | 7.8547   |
| rs17761627     | DIP          | 22 | 45452525 | 2 | 1.635866 |
| rs17761627     | DIP          | 22 | 45452525 | 7 | 0.491342 |
| rs17761627     | DIP          | 22 | 45452525 | 5 | 0.969181 |
| rs2748343      | DIP          | 22 | 45452539 | 5 | 0.680357 |
| rs2748343      | DIP          | 22 | 45452539 | 1 | 0.155767 |
| rs2748343      | DIP          | 22 | 45452539 | 7 | 0.411384 |
| rs2748343      | DIP          | 22 | 45452539 | 8 | 0.719262 |
| rs1047123      | CERK         | 22 | 45459465 | 8 | 7.818617 |
| rs1047123      | CERK         | 22 | 45459465 | 7 | 0.21746  |
| rs1047123      | CERK         | 22 | 45459465 | 1 | 6.464611 |
| rs801719       | CERK         | 22 | 45461009 | 7 | 4.353339 |
| rs801719       | CERK         | 22 | 45461009 | 4 | 0.061242 |
| rs801719       | CERK         | 22 | 45461009 | 1 | 4.524921 |
| rs801719       | CERK         | 22 | 45461009 | 5 | 0.99781  |
| rs13057352     | CERK         | 22 | 45473899 | 8 | 0.380528 |
| rs13057352     | CERK         | 22 | 45473899 | 4 | 0.730205 |
| rs12166204     | CERK         | 22 | 45495569 | 3 | 0.233965 |
| rs15411        | TBC1D22A     | 22 | 45948269 | 8 | 3.670032 |
| rs15411        | TBC1D22A     | 22 | 45948269 | 4 | 0.099244 |
| rs15411        | TBC1D22A     | 22 | 45948269 | 6 | 0.267803 |
| rs877528       | RP11-191L9.1 | 22 | 46399650 | 2 | 1.852622 |
| rs761880       | RP11-191L9.1 | 22 | 46405418 | 1 | 0.709697 |
| SNP22-47531934 | FAM19A5      | 22 | 47531934 | 8 | 7.66422  |
| SNP22-47531934 | FAM19A5      | 22 | 47531934 | 7 | 0.177113 |
| rs2688173      | LOC643653    | 22 | 47996161 | 3 | 0.34212  |
| rs2688173      | LOC643653    | 22 | 47996161 | 5 | 1.051371 |
| rs2688173      | LOC643653    | 22 | 47996161 | 6 | 0.881838 |
| SNP22-48573857 | BRD1         | 22 | 48573857 | 6 | 0.451264 |
| SNP22-48573857 | BRD1         | 22 | 48573857 | 1 | 5.789783 |
| rs910798       | ZBED4        | 22 | 48664442 | 7 | 0.020047 |
| rs910798       | ZBED4        | 22 | 48664442 | 1 | 5.830425 |
| rs910798       | ZBED4        | 22 | 48664442 | 3 | 0.401575 |
| rs5770755      | ZBED4        | 22 | 48666140 | 7 | 0.440661 |

|                |              |    |          |   |          |
|----------------|--------------|----|----------|---|----------|
| rs5770755      | ZBED4        | 22 | 48666140 | 3 | 0.606691 |
| rs1608         | CRELD2       | 22 | 48706947 | 1 | 3.096614 |
| SNP22-48742697 | PIM3         | 22 | 48742697 | 7 | 8.863169 |
| SNP22-48742697 | PIM3         | 22 | 48742697 | 1 | 4.05509  |
| SNP22-48742697 | PIM3         | 22 | 48742697 | 3 | 0.466602 |
| SNP22-48777607 | IL17REL      | 22 | 48777607 | 1 | 0.573916 |
| rs738333       | RP3-355C18.2 | 22 | 48811034 | 2 | 2.558283 |
| rs738333       | RP3-355C18.2 | 22 | 48811034 | 6 | 1.999373 |
| rs738333       | RP3-355C18.2 | 22 | 48811034 | 3 | 1.147014 |
| rs137919       | MLC1         | 22 | 48842091 | 5 | 0.096487 |
| rs137919       | MLC1         | 22 | 48842091 | 3 | 1.060139 |
| rs6010165      | MLC1         | 22 | 48857400 | 5 | 3.307328 |
| rs9617066      | MOV10L1      | 22 | 48872628 | 7 | 1.70219  |
| rs9617066      | MOV10L1      | 22 | 48872628 | 5 | 2.166377 |
| rs9617066      | MOV10L1      | 22 | 48872628 | 3 | 0.584412 |
| rs9617066      | MOV10L1      | 22 | 48872628 | 2 | 0.697115 |
| rs3810971      | MOV10L1      | 22 | 48888793 | 3 | 1.850813 |
| rs2340601      | MOV10L1      | 22 | 48914600 | 2 | 2.724411 |
| rs2340601      | MOV10L1      | 22 | 48914600 | 5 | 3.431693 |
| rs2340601      | MOV10L1      | 22 | 48914600 | 3 | 0.897583 |
| rs2340601      | MOV10L1      | 22 | 48914600 | 7 | 1.816172 |
| rs5771206      | PANX2        | 22 | 48958933 | 7 | 0.444935 |
| rs5771206      | PANX2        | 22 | 48958933 | 6 | 0.426724 |
| rs5771206      | PANX2        | 22 | 48958933 | 1 | 0.706523 |
| rs8238         | TRABD        | 22 | 48979724 | 3 | 0.795362 |
| rs8238         | TRABD        | 22 | 48979724 | 7 | 0.354771 |
| rs8238         | TRABD        | 22 | 48979724 | 4 | 0.086235 |
| rs8238         | TRABD        | 22 | 48979724 | 1 | 5.920382 |
| rs6712         | TRABD        | 22 | 48980049 | 2 | 4.584935 |
| rs6712         | TRABD        | 22 | 48980049 | 6 | 6.27156  |
| rs6712         | TRABD        | 22 | 48980049 | 4 | 7.034979 |
| rs4838865      | TUBGCP6      | 22 | 49006739 | 8 | 6.919021 |
| rs4838865      | TUBGCP6      | 22 | 49006739 | 7 | 3.777059 |
| rs1129880      | MAPK12       | 22 | 49036424 | 4 | 0.470083 |
| rs1129880      | MAPK12       | 22 | 49036424 | 2 | 0.272982 |
| rs1129880      | MAPK12       | 22 | 49036424 | 7 | 4.472261 |
| rs1129880      | MAPK12       | 22 | 49036424 | 1 | 0.422431 |
| rs1129880      | MAPK12       | 22 | 49036424 | 5 | 0.638267 |
| rs2076139      | MAPK11       | 22 | 49046788 | 3 | 0.323926 |
| SNP22-49064261 | PLXNB2       | 22 | 49064261 | 6 | 0.166534 |
| SNP22-49064261 | PLXNB2       | 22 | 49064261 | 4 | 5.601664 |
| SNP22-49064261 | PLXNB2       | 22 | 49064261 | 7 | 6.54146  |
| SNP22-49064261 | PLXNB2       | 22 | 49064261 | 3 | 0.137496 |
| SNP22-49094722 | FAM116B      | 22 | 49094722 | 2 | 4.713101 |
| SNP22-49224010 | SAPS2        | 22 | 49224010 | 1 | 5.178111 |
| rs45484793     | SAPS2        | 22 | 49225315 | 1 | 5.399742 |
| rs743615       | LMF2         | 22 | 49290994 | 6 | 0.789117 |

|           |          |    |          |   |          |
|-----------|----------|----|----------|---|----------|
| rs743615  | LMF2     | 22 | 49290994 | 1 | 0.032627 |
| rs743615  | LMF2     | 22 | 49290994 | 3 | 0.434448 |
| rs743615  | LMF2     | 22 | 49290994 | 8 | 6.703037 |
| rs131824  | LMF2     | 22 | 49292122 | 3 | 0.151842 |
| rs131824  | LMF2     | 22 | 49292122 | 8 | 7.3035   |
| rs131824  | LMF2     | 22 | 49292122 | 5 | 1.215413 |
| rs131824  | LMF2     | 22 | 49292122 | 6 | 6.748809 |
| rs131824  | LMF2     | 22 | 49292122 | 7 | 3.620434 |
| rs131824  | LMF2     | 22 | 49292122 | 1 | 0.165268 |
| rs140523  | SCO2     | 22 | 49309648 | 5 | 0.039632 |
| rs140523  | SCO2     | 22 | 49309648 | 7 | 0.580752 |
| rs140523  | SCO2     | 22 | 49309648 | 1 | 5.050699 |
| rs140523  | SCO2     | 22 | 49309648 | 4 | 6.041282 |
| rs140523  | SCO2     | 22 | 49309648 | 6 | 0.214067 |
| rs1140555 | MAPK8IP2 | 22 | 49392056 | 8 | 0.017296 |
| rs1140555 | MAPK8IP2 | 22 | 49392056 | 7 | 0.9356   |
| rs1140555 | MAPK8IP2 | 22 | 49392056 | 1 | 1.08874  |
| rs6151429 | ARSA     | 22 | 49410343 | 8 | 0.955208 |
| rs6151429 | ARSA     | 22 | 49410343 | 5 | 4.783385 |
| rs6151428 | ARSA     | 22 | 49410476 | 2 | 2.973289 |
| rs743616  | ARSA     | 22 | 49410905 | 5 | 2.401798 |
| rs743616  | ARSA     | 22 | 49410905 | 1 | 2.311667 |
| rs743616  | ARSA     | 22 | 49410905 | 8 | 1.790447 |
| rs743616  | ARSA     | 22 | 49410905 | 4 | 1.129568 |
| rs743616  | ARSA     | 22 | 49410905 | 7 | 0.244269 |
| rs743616  | ARSA     | 22 | 49410905 | 3 | 0.077932 |
| rs743616  | ARSA     | 22 | 49410905 | 2 | 0.582551 |
| rs9616915 | SHANK3   | 22 | 49464446 | 7 | 1.453943 |
| rs9616915 | SHANK3   | 22 | 49464446 | 3 | 1.448756 |
| rs2301584 | SHANK3   | 22 | 49518363 | 8 | 8.991745 |
| rs5939319 | XG       | X  | 2710157  | 5 | 3.120836 |
| rs2306734 | GYG2     | X  | 2787985  | 7 | 1.749755 |
| rs2306734 | GYG2     | X  | 2787985  | 3 | 0.024892 |
| rs211659  | GYG2     | X  | 2809479  | 8 | 2.374155 |
| rs211659  | GYG2     | X  | 2809479  | 6 | 0.024567 |
| rs211660  | GYG2     | X  | 2810295  | 7 | 2.174141 |
| rs211660  | GYG2     | X  | 2810295  | 8 | 0.003686 |
| rs1269    | GYG2     | X  | 2810624  | 2 | 1.924928 |
| rs1269    | GYG2     | X  | 2810624  | 5 | 0.315938 |
| rs1269    | GYG2     | X  | 2810624  | 7 | 1.186827 |
| rs1269    | GYG2     | X  | 2810624  | 3 | 1.519249 |
| rs1269    | GYG2     | X  | 2810624  | 1 | 0.730317 |
| rs1268    | GYG2     | X  | 2810677  | 5 | 1.527842 |
| rs1268    | GYG2     | X  | 2810677  | 1 | 1.282567 |
| rs1268    | GYG2     | X  | 2810677  | 7 | 4.008661 |
| rs1268    | GYG2     | X  | 2810677  | 8 | 4.199967 |
| rs1268    | GYG2     | X  | 2810677  | 3 | 0.257463 |

|            |           |   |          |   |          |
|------------|-----------|---|----------|---|----------|
| rs17325750 | ARSE      | X | 2877413  | 5 | 2.439202 |
| rs17325750 | ARSE      | X | 2877413  | 6 | 0.246818 |
| rs5939407  | ARSH      | X | 2952109  | 7 | 1.683248 |
| rs5983003  | ARSF      | X | 3012687  | 7 | 1.192013 |
| rs17051478 | ARSF      | X | 3038260  | 1 | 0.183144 |
| rs17051478 | ARSF      | X | 3038260  | 2 | 2.89537  |
| rs10522044 | ARSF      | X | 3040426  | 1 | 0.123499 |
| rs1635242  | MXRA5     | X | 3245724  | 7 | 0.139564 |
| rs1635242  | MXRA5     | X | 3245724  | 1 | 0.455805 |
| rs1974522  | MXRA5     | X | 3248733  | 7 | 0.734225 |
| rs1974522  | MXRA5     | X | 3248733  | 4 | 3.406662 |
| rs1974522  | MXRA5     | X | 3248733  | 1 | 4.463918 |
| rs1726199  | MXRA5     | X | 3249545  | 1 | 2.91273  |
| rs1726199  | MXRA5     | X | 3249545  | 7 | 0.548324 |
| rs1635246  | MXRA5     | X | 3250343  | 4 | 3.956029 |
| rs1635246  | MXRA5     | X | 3250343  | 3 | 0.608123 |
| rs1635246  | MXRA5     | X | 3250343  | 1 | 4.151975 |
| rs1635246  | MXRA5     | X | 3250343  | 5 | 0.317438 |
| rs1635247  | MXRA5     | X | 3251050  | 7 | 0.450333 |
| rs1635247  | MXRA5     | X | 3251050  | 3 | 0.690367 |
| rs1635247  | MXRA5     | X | 3251050  | 1 | 5.119123 |
| rs1635247  | MXRA5     | X | 3251050  | 4 | 1.116888 |
| rs5983119  | MXRA5     | X | 3251256  | 7 | 2.262541 |
| rs5983119  | MXRA5     | X | 3251256  | 1 | 4.612554 |
| rs5983119  | MXRA5     | X | 3251256  | 3 | 0.893599 |
| rs5983119  | MXRA5     | X | 3251256  | 6 | 0.616861 |
| rs1635249  | MXRA5     | X | 3251317  | 6 | 0.172408 |
| rs1635249  | MXRA5     | X | 3251317  | 3 | 0.931134 |
| rs1635249  | MXRA5     | X | 3251317  | 1 | 5.933102 |
| rs5916269  | NLGN4X    | X | 5820299  | 8 | 7.881012 |
| rs2290488  | NLGN4X    | X | 6155855  | 4 | 0.207141 |
| rs2290488  | NLGN4X    | X | 6155855  | 3 | 0.524243 |
| rs5916355  | LOC729193 | X | 6158318  | 2 | 0.704193 |
| rs1061191  | CLCN4     | X | 10162748 | 7 | 1.174158 |
| rs5934817  | CLCN4     | X | 10163188 | 1 | 4.727814 |
| rs5934817  | CLCN4     | X | 10163188 | 7 | 1.230786 |
| rs3827468  | FRMPD4    | X | 12649215 | 1 | 0.073539 |
| rs3827468  | FRMPD4    | X | 12649215 | 7 | 0.350742 |
| rs3827468  | FRMPD4    | X | 12649215 | 3 | 1.127788 |
| rs3827468  | FRMPD4    | X | 12649215 | 5 | 1.010957 |
| rs3827468  | FRMPD4    | X | 12649215 | 4 | 0.655694 |
| rs5979716  | FRMPD4    | X | 12649280 | 3 | 0.212022 |
| rs17321823 | FRMPD4    | X | 12650039 | 5 | 1.742159 |
| rs17321823 | FRMPD4    | X | 12650039 | 4 | 2.429685 |
| rs17321823 | FRMPD4    | X | 12650039 | 1 | 0.534368 |
| rs179008   | TLR7      | X | 12813580 | 3 | 0.312023 |
| rs3747414  | TLR8      | X | 12849333 | 3 | 0.924646 |

|            |           |   |          |   |          |
|------------|-----------|---|----------|---|----------|
| rs11095602 | NULL      | X | 12972643 | 8 | 1.676295 |
| rs11095602 | NULL      | X | 12972643 | 6 | 2.460757 |
| rs11095602 | NULL      | X | 12972643 | 2 | 8.163481 |
| rs12391470 | LOC645769 | X | 13579329 | 3 | 0.246187 |
| rs12391470 | LOC645769 | X | 13579329 | 1 | 0.589807 |
| rs2285635  | OFD1      | X | 13662816 | 2 | 2.317328 |
| rs2285635  | OFD1      | X | 13662816 | 8 | 4.533257 |
| rs2285635  | OFD1      | X | 13662816 | 5 | 1.841141 |
| rs2285635  | OFD1      | X | 13662816 | 4 | 2.215153 |
| rs7057480  | GEMIN8    | X | 13954163 | 4 | 1.726716 |
| rs7057480  | GEMIN8    | X | 13954163 | 7 | 1.625187 |
| rs7057480  | GEMIN8    | X | 13954163 | 6 | 2.245188 |
| rs7057480  | GEMIN8    | X | 13954163 | 2 | 1.337818 |
| rs7057480  | GEMIN8    | X | 13954163 | 5 | 1.147334 |
| rs7057480  | GEMIN8    | X | 13954163 | 1 | 1.118225 |
| rs9560     | ASB9      | X | 15172293 | 8 | 0.531404 |
| rs9560     | ASB9      | X | 15172293 | 1 | 5.461388 |
| rs9560     | ASB9      | X | 15172293 | 3 | 0.415493 |
| rs9560     | ASB9      | X | 15172293 | 4 | 0.4955   |
| rs9560     | ASB9      | X | 15172293 | 7 | 8.149341 |
| rs899646   | ASB9      | X | 15198114 | 3 | 0.061328 |
| rs899646   | ASB9      | X | 15198114 | 5 | 1.975921 |
| rs899646   | ASB9      | X | 15198114 | 4 | 1.694452 |
| rs12011065 | FIGF      | X | 15291342 | 5 | 0.66466  |
| rs6632528  | FIGF      | X | 15312319 | 3 | 0.708863 |
| rs4986945  | GRPR      | X | 16078388 | 1 | 4.091976 |
| rs4986945  | GRPR      | X | 16078388 | 3 | 0.719418 |
| rs4986945  | GRPR      | X | 16078388 | 5 | 2.212576 |
| rs3747411  | GRPR      | X | 16080998 | 5 | 1.537698 |
| rs3747411  | GRPR      | X | 16080998 | 7 | 0.255599 |
| rs3747411  | GRPR      | X | 16080998 | 3 | 0.289072 |
| rs3747411  | GRPR      | X | 16080998 | 2 | 1.612829 |
| rs10521655 | GRPR      | X | 16081261 | 3 | 0.672158 |
| rs10521655 | GRPR      | X | 16081261 | 5 | 1.312024 |
| rs10521655 | GRPR      | X | 16081261 | 2 | 3.358579 |
| rs3213544  | SCML2     | X | 18251955 | 6 | 3.165441 |
| rs3213544  | SCML2     | X | 18251955 | 7 | 1.807341 |
| rs35478150 | CDKL5     | X | 18548003 | 1 | 3.298424 |
| rs12009120 | RPS6KA3   | X | 20114382 | 3 | 0.810598 |
| rs12009120 | RPS6KA3   | X | 20114382 | 5 | 1.221072 |
| rs178710   | PHEX      | X | 21960955 | 6 | 0.201614 |
| rs178710   | PHEX      | X | 21960955 | 1 | 3.202358 |
| rs8680     | APOO      | X | 23768373 | 5 | 2.662803 |
| rs8680     | APOO      | X | 23768373 | 2 | 4.2893   |
| rs8680     | APOO      | X | 23768373 | 3 | 2.073978 |
| rs5970618  | APOO      | X | 23835755 | 2 | 2.41888  |
| rs5970618  | APOO      | X | 23835755 | 3 | 0.947015 |

|            |           |   |          |   |          |
|------------|-----------|---|----------|---|----------|
| rs3761611  | PCYT1B    | X | 24488227 | 4 | 0.117261 |
| rs3761611  | PCYT1B    | X | 24488227 | 8 | 1.636299 |
| rs3761610  | PCYT1B    | X | 24488472 | 4 | 3.358787 |
| rs3761610  | PCYT1B    | X | 24488472 | 1 | 0.060388 |
| rs3761610  | PCYT1B    | X | 24488472 | 8 | 6.078153 |
| rs10156959 | PCYT1B    | X | 24488724 | 1 | 0.453618 |
| rs1207651  | PCYT1B    | X | 24575194 | 4 | 0.383285 |
| rs11795624 | MAGEB6    | X | 26120507 | 7 | 2.422074 |
| rs6526806  | IL1RAPL1  | X | 28717363 | 4 | 5.333054 |
| rs5972091  | MAGEB2    | X | 30147947 | 3 | 0.401725 |
| rs5927577  | LOC392437 | X | 30558644 | 1 | 3.022529 |
| rs228406   | DMD       | X | 32413115 | 5 | 0.317254 |
| rs228406   | DMD       | X | 32413115 | 1 | 0.090288 |
| rs3813166  | PRRG1     | X | 37198802 | 1 | 5.352497 |
| rs3813166  | PRRG1     | X | 37198802 | 3 | 0.626488 |
| rs3126414  | NULL      | X | 37364104 | 3 | 1.660849 |
| rs3126414  | NULL      | X | 37364104 | 1 | 2.823909 |
| rs3126415  | NULL      | X | 37371012 | 1 | 3.751878 |
| rs3126415  | NULL      | X | 37371012 | 3 | 0.845879 |
| rs5964151  | CYBB      | X | 37555673 | 3 | 0.583629 |
| rs4827331  | SYTL5     | X | 37833776 | 4 | 0.032242 |
| rs9934     | SRPX      | X | 37893671 | 2 | 1.006561 |
| rs9934     | SRPX      | X | 37893671 | 6 | 3.49914  |
| rs9934     | SRPX      | X | 37893671 | 5 | 1.640917 |
| rs35318931 | SRPX      | X | 37894065 | 6 | 0.273579 |
| rs5917557  | RPGR      | X | 38030855 | 8 | 0.078836 |
| rs5917557  | RPGR      | X | 38030855 | 1 | 1.3479   |
| rs5917557  | RPGR      | X | 38030855 | 6 | 0.221372 |
| rs5917557  | RPGR      | X | 38030855 | 7 | 0.405011 |
| rs5917557  | RPGR      | X | 38030855 | 5 | 0.058217 |
| rs1801688  | RPGR      | X | 38032114 | 4 | 0.986641 |
| rs1801687  | RPGR      | X | 38041621 | 4 | 5.855637 |
| rs3269     | TSPAN7    | X | 38433027 | 4 | 0.51375  |
| rs3269     | TSPAN7    | X | 38433027 | 7 | 2.467841 |
| rs6520683  | MED14     | X | 40458101 | 5 | 0.772319 |
| rs4827256  | USP9X     | X | 40978357 | 6 | 6.463232 |
| rs4827256  | USP9X     | X | 40978357 | 7 | 0.792973 |
| rs4827256  | USP9X     | X | 40978357 | 2 | 1.758198 |
| rs4827256  | USP9X     | X | 40978357 | 1 | 0.197902 |
| rs3013122  | NYX       | X | 41191808 | 5 | 0.676536 |
| rs913602   | GPR34     | X | 41439758 | 7 | 3.544208 |
| rs1023065  | GPR82     | X | 41472162 | 7 | 2.511885 |
| rs1137070  | MAOA      | X | 43488335 | 1 | 4.939524 |
| rs1137070  | MAOA      | X | 43488335 | 6 | 0.297655 |
| rs1137070  | MAOA      | X | 43488335 | 3 | 0.702198 |
| rs4824526  | UTX       | X | 44823507 | 2 | 3.62124  |
| rs4824526  | UTX       | X | 44823507 | 5 | 0.291314 |

|            |           |   |          |   |          |
|------------|-----------|---|----------|---|----------|
| rs4824526  | UTX       | X | 44823507 | 8 | 6.971386 |
| rs735716   | CHST7     | X | 46342730 | 1 | 0.087412 |
| rs735716   | CHST7     | X | 46342730 | 3 | 0.375794 |
| rs735716   | CHST7     | X | 46342730 | 5 | 2.909397 |
| rs735716   | CHST7     | X | 46342730 | 2 | 3.785346 |
| rs6611277  | SLC9A7    | X | 46357770 | 3 | 0.865697 |
| rs6611277  | SLC9A7    | X | 46357770 | 2 | 3.542849 |
| rs6611277  | SLC9A7    | X | 46357770 | 1 | 0.124893 |
| rs6611277  | SLC9A7    | X | 46357770 | 5 | 0.191692 |
| rs6611277  | SLC9A7    | X | 46357770 | 7 | 1.825891 |
| rs1805147  | RP2       | X | 46604442 | 3 | 0.303658 |
| rs11558783 | UBA1      | X | 46947478 | 2 | 4.575912 |
| rs11558783 | UBA1      | X | 46947478 | 1 | 2.821267 |
| rs2294219  | SYN1      | X | 47351305 | 6 | 0.106455 |
| rs2294219  | SYN1      | X | 47351305 | 1 | 2.265688 |
| rs1048118  | CFP       | X | 47368744 | 6 | 1.983301 |
| rs909713   | WASF4     | X | 47547916 | 1 | 3.856986 |
| rs909713   | WASF4     | X | 47547916 | 3 | 3.982943 |
| rs909713   | WASF4     | X | 47547916 | 6 | 3.962655 |
| rs909713   | WASF4     | X | 47547916 | 7 | 5.012244 |
| rs909713   | WASF4     | X | 47547916 | 4 | 3.677713 |
| rs1207506  | WASF4     | X | 47548932 | 1 | 3.550068 |
| rs1207491  | LOC441493 | X | 47580491 | 3 | 1.975377 |
| rs1207491  | LOC441493 | X | 47580491 | 4 | 0.445928 |
| rs1207491  | LOC441493 | X | 47580491 | 1 | 4.131951 |
| rs1207491  | LOC441493 | X | 47580491 | 7 | 0.591428 |
| rs235824   | WDR13     | X | 48341167 | 7 | 1.550544 |
| rs2075866  | CACNA1F   | X | 48958908 | 7 | 0.321567 |
| rs2075866  | CACNA1F   | X | 48958908 | 3 | 2.079887 |
| rs2235127  | CACNA1F   | X | 48968235 | 3 | 0.903324 |
| rs2235127  | CACNA1F   | X | 48968235 | 7 | 0.846069 |
| rs34162630 | CACNA1F   | X | 48969443 | 3 | 0.187739 |
| rs4143304  | DGKK      | X | 50163310 | 3 | 0.484148 |
| rs1151715  | NUDT10    | X | 51091891 | 1 | 0.465911 |
| rs11091720 | GPR173    | X | 53123590 | 6 | 0.790098 |
| rs11091720 | GPR173    | X | 53123590 | 3 | 1.738096 |
| rs11091720 | GPR173    | X | 53123590 | 7 | 0.435616 |
| rs1264013  | RIBC1     | X | 53474347 | 3 | 1.511915 |
| rs1264013  | RIBC1     | X | 53474347 | 4 | 0.065718 |
| rs6638360  | HUWE1     | X | 53658372 | 4 | 0.612015 |
| rs6638360  | HUWE1     | X | 53658372 | 3 | 0.881494 |
| rs17316491 | ITIH5L    | X | 54798255 | 3 | 1.495038 |
| rs2301416  | APEX2     | X | 55045588 | 2 | 7.994389 |
| rs3126255  | USP51     | X | 55531543 | 7 | 0.2172   |
| rs3126255  | USP51     | X | 55531543 | 2 | 1.112674 |
| rs5960093  | RRAGB     | X | 55761010 | 2 | 2.098377 |
| rs5960093  | RRAGB     | X | 55761010 | 7 | 2.156099 |



|            |           |   |          |   |          |
|------------|-----------|---|----------|---|----------|
| rs5960093  | RRAGB     | X | 55761010 | 6 | 1.167966 |
| rs2516023  | FAAH2     | X | 57330082 | 6 | 3.201441 |
| rs2516023  | FAAH2     | X | 57330082 | 7 | 1.21716  |
| rs1367830  | FAAH2     | X | 57491857 | 8 | 0.271675 |
| rs1367830  | FAAH2     | X | 57491857 | 6 | 0.5135   |
| rs1044165  | VSIG4     | X | 65158451 | 5 | 0.213594 |
| rs5919015  | HEPH      | X | 65299410 | 3 | 0.147424 |
| rs1028348  | HEPH      | X | 65300888 | 1 | 0.950723 |
| rs1028348  | HEPH      | X | 65300888 | 2 | 0.66783  |
| rs1028348  | HEPH      | X | 65300888 | 5 | 2.292542 |
| rs2254886  | OPHN1     | X | 67182142 | 7 | 3.735887 |
| rs2254886  | OPHN1     | X | 67182142 | 6 | 0.439993 |
| rs2254886  | OPHN1     | X | 67182142 | 3 | 0.270876 |
| rs2254886  | OPHN1     | X | 67182142 | 4 | 0.855353 |
| rs2230423  | EFNB1     | X | 67977228 | 4 | 0.224384 |
| rs3747463  | TMEM28    | X | 68668446 | 3 | 2.338753 |
| rs3747463  | TMEM28    | X | 68668446 | 6 | 0.349953 |
| rs2281932  | DGAT2L4   | X | 69177661 | 1 | 1.577644 |
| rs2281932  | DGAT2L4   | X | 69177661 | 4 | 4.426721 |
| rs2281932  | DGAT2L4   | X | 69177661 | 6 | 0.607029 |
| rs2281932  | DGAT2L4   | X | 69177661 | 2 | 0.908631 |
| rs3829709  | P2RY4     | X | 69395500 | 4 | 0.018053 |
| rs1152187  | P2RY4     | X | 69395667 | 4 | 0.199308 |
| rs12857550 | ARR3      | X | 69415207 | 7 | 0.799239 |
| rs1130009  | LOC158830 | X | 70240882 | 1 | 2.214814 |
| rs1130009  | LOC158830 | X | 70240882 | 8 | 2.447598 |
| rs9887370  | RGAG4     | X | 71265868 | 8 | 1.986651 |
| rs12393722 | RGAG4     | X | 71266499 | 4 | 0.443518 |
| rs12393722 | RGAG4     | X | 71266499 | 8 | 3.1861   |
| rs7884806  | FLJ44635  | X | 71296427 | 4 | 1.094118 |
| rs7884806  | FLJ44635  | X | 71296427 | 8 | 3.911727 |
| rs7884806  | FLJ44635  | X | 71296427 | 7 | 1.131847 |
| rs660392   | HDAC8     | X | 71466237 | 4 | 0.610423 |
| rs660392   | HDAC8     | X | 71466237 | 8 | 2.243211 |
| rs660392   | HDAC8     | X | 71466237 | 7 | 1.89792  |
| rs660392   | HDAC8     | X | 71466237 | 5 | 1.722284 |
| rs11093407 | PABPC1L2A | X | 72214266 | 4 | 1.623508 |
| rs13789    | ITM2A     | X | 78502870 | 6 | 0.600386 |
| rs1113265  | FAM46D    | X | 79585249 | 3 | 0.438774 |
| rs1113265  | FAM46D    | X | 79585249 | 2 | 2.545795 |
| rs16980188 | POF1B     | X | 84419457 | 6 | 3.752724 |
| rs16980188 | POF1B     | X | 84419457 | 4 | 1.939018 |
| rs12557804 | POF1B     | X | 84420064 | 6 | 1.016476 |
| rs12557804 | POF1B     | X | 84420064 | 7 | 2.751752 |
| rs12557804 | POF1B     | X | 84420064 | 4 | 0.086725 |
| rs363774   | POF1B     | X | 84449791 | 7 | 4.4347   |
| rs363774   | POF1B     | X | 84449791 | 5 | 0.341161 |

|            |         |   |           |   |          |
|------------|---------|---|-----------|---|----------|
| rs363774   | POF1B   | X | 84449791  | 8 | 1.194619 |
| rs363774   | POF1B   | X | 84449791  | 3 | 0.241704 |
| rs363774   | POF1B   | X | 84449791  | 1 | 4.819035 |
| rs222084   | KLHL4   | X | 86773900  | 3 | 0.496941 |
| rs222084   | KLHL4   | X | 86773900  | 6 | 0.649824 |
| rs222084   | KLHL4   | X | 86773900  | 5 | 0.306835 |
| rs222113   | KLHL4   | X | 86808742  | 6 | 0.394835 |
| rs1045686  | NAP1L3  | X | 92814290  | 7 | 1.488733 |
| rs1045686  | NAP1L3  | X | 92814290  | 8 | 3.009026 |
| rs2642219  | RPA4    | X | 96026062  | 4 | 0.297735 |
| rs2642219  | RPA4    | X | 96026062  | 2 | 5.174047 |
| rs1335268  | PCDH19  | X | 99437539  | 8 | 2.664425 |
| rs1953337  | PCDH19  | X | 99548625  | 4 | 0.747521 |
| rs1953337  | PCDH19  | X | 99548625  | 1 | 5.538073 |
| rs1953337  | PCDH19  | X | 99548625  | 3 | 1.62501  |
| rs1953337  | PCDH19  | X | 99548625  | 8 | 2.622112 |
| rs1802288  | TSPAN6  | X | 99776860  | 7 | 2.110357 |
| rs1802288  | TSPAN6  | X | 99776860  | 1 | 3.729851 |
| rs1802288  | TSPAN6  | X | 99776860  | 3 | 0.224067 |
| rs1343213  | SRPX2   | X | 99785900  | 6 | 2.619207 |
| rs1343213  | SRPX2   | X | 99785900  | 3 | 0.882294 |
| rs8780     | SYTL4   | X | 99816188  | 6 | 0.838586 |
| rs8780     | SYTL4   | X | 99816188  | 3 | 0.762102 |
| rs8780     | SYTL4   | X | 99816188  | 1 | 3.363814 |
| rs8780     | SYTL4   | X | 99816188  | 7 | 5.307539 |
| rs8780     | SYTL4   | X | 99816188  | 4 | 0.369398 |
| rs41307262 | ARL13A  | X | 100129192 | 8 | 0.675901 |
| rs5921705  | CXorf34 | X | 100152208 | 2 | 3.808848 |
| rs4828078  | DRP2    | X | 100402448 | 6 | 0.240018 |
| rs4828078  | DRP2    | X | 100402448 | 7 | 2.520762 |
| rs4828078  | DRP2    | X | 100402448 | 8 | 0.55151  |
| rs6523506  | ARMCX4  | X | 100640066 | 4 | 0.105761 |
| rs6523506  | ARMCX4  | X | 100640066 | 1 | 4.439317 |
| rs6523506  | ARMCX4  | X | 100640066 | 7 | 0.623965 |
| rs7060868  | ARMCX4  | X | 100640519 | 7 | 1.165217 |
| rs7060868  | ARMCX4  | X | 100640519 | 3 | 0.931148 |
| rs7060868  | ARMCX4  | X | 100640519 | 1 | 3.499978 |
| rs7060868  | ARMCX4  | X | 100640519 | 4 | 3.923877 |
| rs7060491  | ARMCX4  | X | 100640805 | 4 | 1.857247 |
| rs7060491  | ARMCX4  | X | 100640805 | 1 | 6.627084 |
| rs7055900  | ARMCX1  | X | 100692287 | 3 | 0.233033 |
| rs5944778  | ZMAT1   | X | 101028449 | 1 | 5.633508 |
| rs5944778  | ZMAT1   | X | 101028449 | 3 | 0.64313  |
| rs5944778  | ZMAT1   | X | 101028449 | 7 | 1.522984 |
| rs5944778  | ZMAT1   | X | 101028449 | 5 | 1.525506 |
| rs5986812  | ZMAT1   | X | 101030810 | 3 | 0.988915 |
| rs5986812  | ZMAT1   | X | 101030810 | 5 | 1.251883 |

|            |           |   |           |   |          |
|------------|-----------|---|-----------|---|----------|
| rs5986812  | ZMAT1     | X | 101030810 | 1 | 4.383883 |
| rs5944883  | ZMAT1     | X | 101031610 | 7 | 0.69219  |
| rs1045761  | TCEAL7    | X | 102472558 | 7 | 1.224607 |
| rs1045761  | TCEAL7    | X | 102472558 | 1 | 0.44862  |
| rs1045761  | TCEAL7    | X | 102472558 | 2 | 0.166386 |
| rs1180895  | RAB40A    | X | 102642207 | 5 | 1.654544 |
| rs1180895  | RAB40A    | X | 102642207 | 6 | 0.76927  |
| rs1126707  | PLP1      | X | 102929538 | 1 | 0.525522 |
| rs1126707  | PLP1      | X | 102929538 | 2 | 3.800319 |
| rs6621755  | LOC644261 | X | 103069416 | 3 | 2.218766 |
| rs6621755  | LOC644261 | X | 103069416 | 5 | 1.07713  |
| rs6621755  | LOC644261 | X | 103069416 | 7 | 2.115617 |
| rs4907851  | LOC644261 | X | 103070129 | 1 | 1.429507 |
| rs4907851  | LOC644261 | X | 103070129 | 6 | 0.899098 |
| rs5916825  | MCART6    | X | 103234886 | 4 | 2.564691 |
| rs5916825  | MCART6    | X | 103234886 | 7 | 2.078362 |
| rs5916825  | MCART6    | X | 103234886 | 5 | 2.173869 |
| rs3764765  | IL1RAPL2  | X | 104879619 | 3 | 1.465966 |
| rs3764765  | IL1RAPL2  | X | 104879619 | 7 | 2.757247 |
| rs3764765  | IL1RAPL2  | X | 104879619 | 1 | 1.352584 |
| rs209373   | NRK       | X | 105038938 | 2 | 2.725855 |
| rs209373   | NRK       | X | 105038938 | 5 | 1.992436 |
| rs209109   | NRK       | X | 105088291 | 5 | 1.838054 |
| rs209109   | NRK       | X | 105088291 | 2 | 3.854401 |
| rs209111   | NRK       | X | 105089256 | 5 | 0.046614 |
| rs17254305 | VSIG1     | X | 107202589 | 6 | 0.090439 |
| rs5973851  | COL4A6    | X | 107304386 | 6 | 3.85648  |
| rs5973851  | COL4A6    | X | 107304386 | 2 | 0.327821 |
| rs5973851  | COL4A6    | X | 107304386 | 7 | 2.289137 |
| rs5973851  | COL4A6    | X | 107304386 | 1 | 1.563258 |
| rs1042065  | COL4A6    | X | 107320344 | 1 | 0.374009 |
| rs1801164  | IRS4      | X | 107863596 | 7 | 0.129771 |
| rs1801164  | IRS4      | X | 107863596 | 2 | 1.164549 |
| rs1801164  | IRS4      | X | 107863596 | 6 | 0.056314 |
| rs12008095 | GUCY2F    | X | 108595208 | 2 | 1.865511 |
| rs12008095 | GUCY2F    | X | 108595208 | 3 | 1.764079 |
| rs494589   | GUCY2F    | X | 108611792 | 5 | 1.116762 |
| rs494589   | GUCY2F    | X | 108611792 | 3 | 0.421868 |
| rs5942633  | RGAG1     | X | 109584422 | 1 | 3.082878 |
| rs2404177  | CHRD1     | X | 109805537 | 7 | 1.123419 |
| rs2404177  | CHRD1     | X | 109805537 | 1 | 1.651292 |
| rs5929415  | LHFPL1    | X | 111760922 | 1 | 4.577973 |
| rs5929415  | LHFPL1    | X | 111760922 | 3 | 0.340747 |
| rs5929415  | LHFPL1    | X | 111760922 | 4 | 0.462815 |
| rs7064462  | LHFPL1    | X | 111800900 | 3 | 0.144505 |
| rs583430   | AMOT      | X | 111907348 | 6 | 0.979412 |
| rs583430   | AMOT      | X | 111907348 | 4 | 0.574687 |

|            |           |   |           |   |          |
|------------|-----------|---|-----------|---|----------|
| rs583430   | AMOT      | X | 111907348 | 3 | 0.635842 |
| rs5194     | AGTR2     | X | 115218858 | 1 | 2.51269  |
| rs6603401  | WDR44     | X | 117412170 | 7 | 2.728753 |
| rs2286977  | DOCK11    | X | 117584169 | 3 | 0.752997 |
| rs2286977  | DOCK11    | X | 117584169 | 6 | 1.140302 |
| rs2286977  | DOCK11    | X | 117584169 | 1 | 3.644321 |
| rs2286977  | DOCK11    | X | 117584169 | 7 | 1.165173 |
| rs2379118  | DOCK11    | X | 117703801 | 2 | 0.944315 |
| rs2379118  | DOCK11    | X | 117703801 | 1 | 0.870202 |
| rs2186106  | DOCK11    | X | 117703930 | 1 | 0.266986 |
| rs2186106  | DOCK11    | X | 117703930 | 8 | 1.523467 |
| rs261663   | LOC159007 | X | 117896179 | 8 | 4.093395 |
| rs3813933  | LONRF3    | X | 117992813 | 5 | 1.945299 |
| rs3813933  | LONRF3    | X | 117992813 | 3 | 0.632179 |
| rs217976   | SLC25A43  | X | 118417394 | 1 | 0.066502 |
| rs217976   | SLC25A43  | X | 118417394 | 5 | 2.291079 |
| rs17261110 | SLC25A43  | X | 118471475 | 5 | 2.326039 |
| rs17261110 | SLC25A43  | X | 118471475 | 1 | 5.082413 |
| rs17261110 | SLC25A43  | X | 118471475 | 8 | 2.23038  |
| rs12390    | SLC25A5   | X | 118488464 | 2 | 1.32529  |
| rs2782224  | ANKRD58   | X | 118777165 | 1 | 0.223274 |
| rs2782224  | ANKRD58   | X | 118777165 | 4 | 1.519198 |
| rs2782224  | ANKRD58   | X | 118777165 | 2 | 0.332047 |
| rs2782224  | ANKRD58   | X | 118777165 | 5 | 0.892042 |
| rs708463   | RNF113A   | X | 118889733 | 8 | 3.841073 |
| rs708463   | RNF113A   | X | 118889733 | 6 | 0.249444 |
| rs708463   | RNF113A   | X | 118889733 | 5 | 2.05641  |
| rs708463   | RNF113A   | X | 118889733 | 2 | 3.476463 |
| rs42889    | LAMP2     | X | 119455569 | 8 | 3.39735  |
| rs42889    | LAMP2     | X | 119455569 | 4 | 0.524456 |
| rs42889    | LAMP2     | X | 119455569 | 3 | 0.442571 |
| rs42889    | LAMP2     | X | 119455569 | 7 | 1.667478 |
| rs42889    | LAMP2     | X | 119455569 | 1 | 5.741722 |
| rs502434   | GRIA3     | X | 122364958 | 3 | 0.923484 |
| rs502434   | GRIA3     | X | 122364958 | 7 | 1.460566 |
| rs502434   | GRIA3     | X | 122364958 | 5 | 2.516363 |
| rs502434   | GRIA3     | X | 122364958 | 1 | 4.936334 |
| rs502434   | GRIA3     | X | 122364958 | 4 | 3.175378 |
| rs4825872  | LOC402422 | X | 122524244 | 1 | 0.672779 |
| rs4825872  | LOC402422 | X | 122524244 | 5 | 0.920333 |
| rs4825872  | LOC402422 | X | 122524244 | 6 | 1.919073 |
| rs4825872  | LOC402422 | X | 122524244 | 4 | 1.58691  |
| rs17334746 | BIRC4     | X | 122870388 | 3 | 1.027217 |
| rs17334746 | BIRC4     | X | 122870388 | 6 | 1.546361 |
| rs17334746 | BIRC4     | X | 122870388 | 5 | 1.904042 |
| rs17334746 | BIRC4     | X | 122870388 | 8 | 1.105364 |
| rs5958343  | BIRC4     | X | 122873953 | 7 | 2.256564 |

|            |           |   |           |   |          |
|------------|-----------|---|-----------|---|----------|
| rs5958343  | BIRC4     | X | 122873953 | 6 | 1.643037 |
| rs5958343  | BIRC4     | X | 122873953 | 8 | 2.92487  |
| rs5958343  | BIRC4     | X | 122873953 | 3 | 0.787843 |
| rs5958343  | BIRC4     | X | 122873953 | 5 | 2.53427  |
| rs5958343  | BIRC4     | X | 122873953 | 1 | 4.625594 |
| rs3747343  | XPNPEP2   | X | 128708295 | 6 | 3.937833 |
| rs3747343  | XPNPEP2   | X | 128708295 | 8 | 2.369955 |
| rs3747343  | XPNPEP2   | X | 128708295 | 2 | 2.507631 |
| rs3747343  | XPNPEP2   | X | 128708295 | 1 | 2.461047 |
| rs3747343  | XPNPEP2   | X | 128708295 | 3 | 1.853408 |
| rs3747343  | XPNPEP2   | X | 128708295 | 5 | 2.156586 |
| rs1053486  | ZDHC9     | X | 128766639 | 3 | 0.843024 |
| rs3788847  | ELF4      | X | 129027497 | 5 | 1.152511 |
| rs3788847  | ELF4      | X | 129027497 | 2 | 9.691149 |
| rs1139851  | AIFM1     | X | 129111201 | 6 | 1.165619 |
| rs1139851  | AIFM1     | X | 129111201 | 4 | 3.072134 |
| rs1139851  | AIFM1     | X | 129111201 | 2 | 3.468857 |
| rs608117   | ZNF280C   | X | 129166447 | 6 | 3.473417 |
| rs209238   | ZNF280C   | X | 129176976 | 2 | 2.897915 |
| rs209238   | ZNF280C   | X | 129176976 | 4 | 1.614621 |
| rs1128617  | IGSF1     | X | 130243499 | 8 | 1.098027 |
| rs17316625 | OR13H1    | X | 130506277 | 6 | 3.047969 |
| rs17316625 | OR13H1    | X | 130506277 | 3 | 2.473665 |
| rs17316625 | OR13H1    | X | 130506277 | 1 | 4.491384 |
| rs17316625 | OR13H1    | X | 130506277 | 5 | 3.980474 |
| rs17316625 | OR13H1    | X | 130506277 | 4 | 1.603575 |
| rs3764771  | FRMD7     | X | 131038916 | 1 | 3.316298 |
| rs5977623  | FRMD7     | X | 131040193 | 3 | 0.268225 |
| rs5977623  | FRMD7     | X | 131040193 | 1 | 3.787343 |
| rs5977623  | FRMD7     | X | 131040193 | 5 | 0.412815 |
| rs7051368  | FRMD7     | X | 131040625 | 4 | 2.002085 |
| rs7051368  | FRMD7     | X | 131040625 | 8 | 0.985838 |
| rs2498769  | LOC644538 | X | 133954060 | 3 | 0.3868   |
| rs2498769  | LOC644538 | X | 133954060 | 8 | 1.03456  |
| rs2498769  | LOC644538 | X | 133954060 | 1 | 2.591888 |
| rs2498769  | LOC644538 | X | 133954060 | 6 | 0.175599 |
| rs2498769  | LOC644538 | X | 133954060 | 7 | 1.482352 |
| rs7042     | ZNF75     | X | 134247673 | 6 | 0.344817 |
| rs1419828  | ZNF75     | X | 134305279 | 6 | 0.292013 |
| rs1419828  | ZNF75     | X | 134305279 | 3 | 1.52113  |
| rs1419828  | ZNF75     | X | 134305279 | 5 | 2.164535 |
| rs1419828  | ZNF75     | X | 134305279 | 1 | 4.7698   |
| rs4829799  | SAGE1     | X | 134821671 | 1 | 3.271692 |
| rs4829799  | SAGE1     | X | 134821671 | 4 | 2.240966 |
| rs2273221  | MAP7D3    | X | 135138451 | 6 | 0.249328 |
| rs2273221  | MAP7D3    | X | 135138451 | 2 | 2.313089 |
| rs2273221  | MAP7D3    | X | 135138451 | 3 | 1.464105 |

|            |           |   |           |   |          |
|------------|-----------|---|-----------|---|----------|
| rs2273221  | MAP7D3    | X | 135138451 | 4 | 1.325892 |
| rs4829830  | GPR112    | X | 135257169 | 5 | 0.422815 |
| rs4829830  | GPR112    | X | 135257169 | 3 | 0.086171 |
| rs912002   | GPR112    | X | 135258149 | 3 | 0.322406 |
| rs5930933  | GPR112    | X | 135259024 | 2 | 0.612298 |
| rs5930933  | GPR112    | X | 135259024 | 5 | 0.950442 |
| rs5930942  | GPR112    | X | 135324064 | 3 | 0.242285 |
| rs440051   | F9        | X | 138472583 | 2 | 1.25589  |
| rs1051619  | MCF2      | X | 138507378 | 2 | 3.050274 |
| rs1051619  | MCF2      | X | 138507378 | 1 | 0.052001 |
| rs1051619  | MCF2      | X | 138507378 | 8 | 3.345889 |
| rs1051619  | MCF2      | X | 138507378 | 3 | 1.283147 |
| rs1051619  | MCF2      | X | 138507378 | 7 | 2.888499 |
| rs2239837  | LOC645188 | X | 140542435 | 3 | 0.023313 |
| rs3765272  | MAGEC2    | X | 141118531 | 1 | 3.295912 |
| rs3765272  | MAGEC2    | X | 141118531 | 3 | 2.590793 |
| rs3765272  | MAGEC2    | X | 141118531 | 2 | 3.575717 |
| rs3765272  | MAGEC2    | X | 141118531 | 7 | 3.14167  |
| rs3765272  | MAGEC2    | X | 141118531 | 5 | 3.880769 |
| rs237520   | UBE2NL    | X | 142795134 | 3 | 2.413794 |
| rs237520   | UBE2NL    | X | 142795134 | 4 | 3.879593 |
| rs3810704  | SLITRK2   | X | 144711944 | 8 | 1.841287 |
| rs3810704  | SLITRK2   | X | 144711944 | 5 | 0.381243 |
| rs3810704  | SLITRK2   | X | 144711944 | 2 | 3.969761 |
| rs12011040 | AFF2      | X | 147842900 | 2 | 3.372488 |
| rs6641482  | AFF2      | X | 147887801 | 7 | 0.030808 |
| rs10126316 | MAGEA11   | X | 148575735 | 1 | 0.778607 |
| rs5925425  | CD99L2    | X | 149687406 | 1 | 4.230178 |
| rs5925425  | CD99L2    | X | 149687406 | 8 | 3.964463 |
| rs561077   | GPR50     | X | 150100307 | 5 | 1.152249 |
| rs561077   | GPR50     | X | 150100307 | 1 | 0.04152  |
| rs561077   | GPR50     | X | 150100307 | 7 | 0.202543 |
| rs7067140  | LOC203547 | X | 150326043 | 5 | 2.39373  |
| rs7067140  | LOC203547 | X | 150326043 | 4 | 0.588855 |
| rs7067140  | LOC203547 | X | 150326043 | 3 | 0.380303 |
| rs7067140  | LOC203547 | X | 150326043 | 7 | 2.893652 |
| rs7067140  | LOC203547 | X | 150326043 | 1 | 0.187256 |
| rs7067140  | LOC203547 | X | 150326043 | 2 | 2.181237 |
| rs879371   | CNGA2     | X | 150664131 | 3 | 0.490399 |
| rs1061418  | GABRE     | X | 150873636 | 5 | 2.254177 |
| rs2020030  | MAGEA5    | X | 151034283 | 6 | 1.707517 |
| rs2020030  | MAGEA5    | X | 151034283 | 8 | 1.206506 |
| rs6627242  | KRT8P8    | X | 151399255 | 4 | 1.576174 |
| rs6627242  | KRT8P8    | X | 151399255 | 1 | 1.800708 |
| rs6627242  | KRT8P8    | X | 151399255 | 5 | 1.595734 |
| rs6627242  | KRT8P8    | X | 151399255 | 3 | 0.875769 |
| rs6526155  | PNMA3     | X | 151977198 | 7 | 0.057879 |

|            |         |   |           |   |          |
|------------|---------|---|-----------|---|----------|
| rs1045069  | PNMA3   | X | 151979017 | 7 | 2.272222 |
| rs1045069  | PNMA3   | X | 151979017 | 5 | 0.360269 |
| rs1045069  | PNMA3   | X | 151979017 | 6 | 0.267515 |
| rs2301186  | PNMA6A  | X | 151993619 | 5 | 1.81714  |
| rs2301186  | PNMA6A  | X | 151993619 | 6 | 0.34295  |
| rs2301187  | PNMA6A  | X | 151993851 | 4 | 1.698504 |
| rs1467881  | ZNF275  | X | 152263302 | 1 | 2.553397 |
| rs1467881  | ZNF275  | X | 152263302 | 7 | 1.234809 |
| rs4828611  | ZNF275  | X | 152267020 | 4 | 0.452753 |
| rs4828611  | ZNF275  | X | 152267020 | 7 | 0.302448 |
| rs4828611  | ZNF275  | X | 152267020 | 1 | 6.140096 |
| rs3257     | ZNF275  | X | 152270177 | 1 | 5.599891 |
| rs3257     | ZNF275  | X | 152270177 | 7 | 2.111662 |
| rs1042103  | BGN     | X | 152427225 | 3 | 1.697802 |
| rs743642   | BGN     | X | 152427415 | 4 | 2.565157 |
| rs2269415  | ATP2B3  | X | 152476922 | 1 | 3.543569 |
| rs2269415  | ATP2B3  | X | 152476922 | 4 | 2.678226 |
| rs2266879  | PLXNB3  | X | 152688992 | 8 | 2.006698 |
| rs2266879  | PLXNB3  | X | 152688992 | 5 | 1.44015  |
| rs2266879  | PLXNB3  | X | 152688992 | 6 | 0.89604  |
| rs2266879  | PLXNB3  | X | 152688992 | 7 | 2.675201 |
| rs2266879  | PLXNB3  | X | 152688992 | 4 | 1.73811  |
| rs2266879  | PLXNB3  | X | 152688992 | 1 | 2.456441 |
| rs1802092  | SRPK3   | X | 152704178 | 5 | 1.195531 |
| rs1802092  | SRPK3   | X | 152704178 | 4 | 0.258075 |
| rs3747312  | PDZD4   | X | 152724193 | 1 | 3.360173 |
| rs5201     | AVPR2   | X | 152825187 | 5 | 0.565698 |
| rs5201     | AVPR2   | X | 152825187 | 1 | 0.731864 |
| rs2070097  | ARHGAP4 | X | 152829448 | 2 | 3.638602 |
| rs2070097  | ARHGAP4 | X | 152829448 | 4 | 1.321523 |
| rs2070097  | ARHGAP4 | X | 152829448 | 6 | 0.495825 |
| rs2070097  | ARHGAP4 | X | 152829448 | 7 | 0.675826 |
| rs2070097  | ARHGAP4 | X | 152829448 | 1 | 1.247382 |
| rs2070097  | ARHGAP4 | X | 152829448 | 3 | 0.194438 |
| rs730106   | HCFC1   | X | 152874851 | 1 | 2.441719 |
| rs730106   | HCFC1   | X | 152874851 | 4 | 0.704002 |
| rs730106   | HCFC1   | X | 152874851 | 7 | 0.997952 |
| rs730106   | HCFC1   | X | 152874851 | 8 | 0.556098 |
| rs35567597 | PLXNA3  | X | 153347381 | 1 | 4.794392 |
| rs35567597 | PLXNA3  | X | 153347381 | 5 | 1.032487 |
| rs1050047  | UBL4A   | X | 153366645 | 8 | 6.472296 |
| rs7057286  | UBL4A   | X | 153366981 | 7 | 3.220462 |
| GA026663   | G6PD    | X | 153413848 | 7 | 3.963838 |
| rs3813455  | GAB3    | X | 153557329 | 6 | 0.469916 |
| rs5945108  | GAB3    | X | 153557591 | 1 | 3.156637 |
| rs4431759  | GAB3    | X | 153557667 | 1 | 3.73837  |
| rs4431759  | GAB3    | X | 153557667 | 7 | 1.500249 |

|            |       |   |           |   |          |
|------------|-------|---|-----------|---|----------|
| rs1127051  | DKC1  | X | 153657778 | 6 | 0.485948 |
| GA026671   | DKC1  | X | 153658342 | 7 | 0.963954 |
| rs559165   | CLIC2 | X | 154160367 | 7 | 0.855297 |
| rs35507574 | SHOX  | X | 526325    | 2 | 1.587088 |
| rs35507574 | SHOX  | X | 526325    | 3 | 0.733652 |
| rs35507574 | SHOX  | X | 526325    | 5 | 0.935015 |
| rs35507574 | SHOX  | X | 526325    | 8 | 0.64631  |
| rs17879004 | IL3RA | X | 1427404   | 1 | 1.80674  |
| rs11480    | IL3RA | X | 1461471   | 4 | 4.295349 |
| rs11480    | IL3RA | X | 1461471   | 7 | 0.137427 |
| rs11480    | IL3RA | X | 1461471   | 1 | 2.898067 |
| rs11480    | IL3RA | X | 1461471   | 8 | 2.54195  |
| rs4503285  | ASMTL | X | 1497881   | 5 | 0.00182  |
| rs4503285  | ASMTL | X | 1497881   | 7 | 1.308074 |
| rs4503285  | ASMTL | X | 1497881   | 8 | 0.174579 |
| rs4503285  | ASMTL | X | 1497881   | 3 | 1.005935 |
| rs4933063  | ASMT  | X | 1715404   | 5 | 0.299394 |
| rs17849631 | CD99  | X | 2642482   | 5 | 0.151213 |
| rs700449   | SPRY3 | X | 154663050 | 3 | 2.395819 |
| rs700449   | SPRY3 | X | 154663050 | 4 | 0.164964 |
| rs700455   | SPRY3 | X | 154664526 | 1 | 1.222149 |
| rs700455   | SPRY3 | X | 154664526 | 2 | 0.530189 |
