# Supplementary material for: Identifying breast cancer risk loci by global differential allele-specific expression (DASE) analysis in mammary epithelial transcriptome
Source: PubMed Central journal article supplement (PMC3532379; doi:10.1186/1471-2164-13-570), 2012-10-30
Supplement: 1471-2164-13-570-S2.pdf [file 1471-2164-13-570-S2.pdf]

**Table S2. Function analysis by IPA**

| Biological Function                                   | Molecules                                                                | P-value           |
|-------------------------------------------------------|--------------------------------------------------------------------------|-------------------|
| Dermatological Diseases and Conditions                | ZNF331,SLAMF1,NLRP1,HLA-G,ACPP,GRIN3A                                    | 7.49E-04-3.85E-02 |
| Immunological Disease                                 | ZNF331,HCG4,FLJ39061,ADAMTSL3,TMCC3,AGBL1,NLRP1,HLA-G,XIAP,ACPP          | 7.49E-04-2.26E-02 |
| Cell Death                                            | SLAMF1,WNT3A,NLRP1,PRDM14,HLA-G,XIAP,GRIN3A                              | 1.51E-03-4.86E-02 |
| Cell Morphology                                       | SLAMF1,WNT3A,HLA-G,GRIN3A,DMBT1                                          | 1.51E-03-2.68E-02 |
| Cellular Compromise                                   | SLAMF1,XIAP,GRIN3A                                                       | 1.51E-03-4.14E-02 |
| Cellular Growth and Proliferation                     | WNT3A,SLAMF1,PRDM14,HLA-G,XIAP,ACPP                                      | 1.51E-03-4.96E-02 |
| Cellular Movement                                     | WNT3A,XIAP,DMBT1                                                         | 1.51E-03-2.83E-02 |
| Embryonic Development                                 | MMP20,WNT3A,PRDM14,XIAP,DMBT1                                            | 1.51E-03-4.86E-02 |
| Genetic Disorder                                      | ZNF331,MMP20,ADAMTSL3,SLAMF1,NLRP1,AGBL1,FLJ42393,XIAP,DMBT1,ACPP,GRIN3A | 1.51E-03-3.85E-02 |
| Hair and Skin Development and Function                | WNT3A                                                                    | 1.51E-03-1.5E-02  |
| Hematological System Development and Function         | WNT3A,SLAMF1,HLA-G,DMBT1                                                 | 1.51E-03-4.27E-02 |
| Immune Cell Trafficking                               | DMBT1                                                                    | 1.51E-03-1.51E-03 |
| Nervous System Development and Function               | WNT3A,GRIN3A                                                             | 1.51E-03-2.68E-02 |
| Neurological Disease                                  | ZNF331,NLRP1,AGBL1,XIAP,FLJ42393,ACPP,DMBT1,GRIN3A                       | 1.51E-03-2.97E-02 |
| Organ Development                                     | MMP20,WNT3A                                                              | 1.51E-03-4.86E-02 |
| Organismal Development                                | MMP20,WNT3A,PRDM14,XIAP                                                  | 1.51E-03-4.86E-02 |
| Organismal Injury and Abnormalities                   | XIAP,GRIN3A                                                              | 1.51E-03-3.85E-02 |
| Tissue Development                                    | MMP20,WNT3A,PRDM14,DMBT1                                                 | 1.51E-03-4.86E-02 |
| Tissue Morphology                                     | MMP20,WNT3A                                                              | 1.51E-03-1.35E-02 |
| Tumor Morphology                                      | WNT3A,XIAP                                                               | 1.51E-03-4.96E-02 |
| Cancer                                                | MUC16,NLRP1,PRDM14,XIAP,GRIN3A,DMBT1,MAGEC2 (includes others)            | 3.01E-03-4.66E-02 |
| Cell Cycle                                            | GRK4,WNT3A                                                               | 3.01E-03-2.46E-02 |
| Cellular Assembly and Organization                    | WNT3A,CHRAC1,HLA-G,XIAP                                                  | 3.01E-03-3.7E-02  |
| Cellular Development                                  | SLAMF1,WNT3A,PRDM14,HLA-G,XIAP,ACPP,DMBT1                                | 3.01E-03-4.88E-02 |
| Cellular Function and Maintenance                     | WNT3A,SLAMF1,HLA-G,GRIN3A                                                | 3.01E-03-2.68E-02 |
| Connective Tissue Development and Function            | WNT3A                                                                    | 3.01E-03-4.52E-03 |
| Dental Disease                                        | MMP20                                                                    | 3.01E-03-3.01E-03 |
| Developmental Disorder                                | MMP20,GRIN3A                                                             | 3.01E-03-1.5E-02  |
| Gastrointestinal Disease                              | MMP20,ADAMTSL3,AGBL1,GRIN3A,DMBT1,ACPP                                   | 3.01E-03-3.7E-02  |
| Humoral Immune Response                               | WNT3A,SLAMF1                                                             | 3.01E-03-4.27E-02 |
| Infectious Disease                                    | FLJ39061,SLAMF1,NLRP1,PRDM14,USP6,XIAP,DMBT1,GRIN3A                      | 3.01E-03-3.85E-02 |
| Skeletal and Muscular Disorders                       | ZNF331,MMP20,ADAMTSL3,WNT3A,AGBL1,HLA-G,XIAP,ACPP                        | 3.01E-03-3.01E-02 |
| Skeletal and Muscular System Development and Function | WNT3A                                                                    | 3.01E-03-4.57E-02 |
| Cardiovascular System Development and Function        | WNT3A,XIAP                                                               | 4.52E-03-4.86E-02 |
| Digestive System Development and Function             | MMP20                                                                    | 4.52E-03-6.02E-03 |
| Antimicrobial Response                                | NLRP1,HLA-G,DMBT1                                                        | 6.02E-03-7.55E-03 |
| Respiratory Disease                                   | XIAP,GRIN3A                                                              | 7.52E-03-1.65E-02 |
| Inflammatory Response                                 | NLRP1,HLA-G                                                              | 7.55E-03-4.57E-02 |
| Cell-To-Cell Signaling and Interaction                | SLAMF1,HLA-G,GRIN3A,DMBT1                                                | 7.72E-03-3.12E-02 |
| Psychological Disorders                               | ZNF331,NLRP1,AGBL1,FLJ42393,ACPP,GRIN3A                                  | 7.99E-03-3.85E-02 |
| Hematopoiesis                                         | WNT3A,SLAMF1,HLA-G,DMBT1                                                 | 9.01E-03-2.09E-02 |
| Auditory Disease                                      | GRIN3A                                                                   | 1.05E-02-1.05E-02 |
| Cell-mediated Immune Response                         | SLAMF1,HLA-G                                                             | 1.05E-02-1.8E-02  |
| Lymphoid Tissue Structure and Development             | SLAMF1,HLA-G                                                             | 1.05E-02-1.8E-02  |
| Reproductive System Disease                           | MUC16,NLRP1,PRDM14,XIAP,GRIN3A,DMBT1,MAGEC2 (includes others)            | 1.05E-02-4.66E-02 |
| Cellular Response to Therapeutics                     | XIAP                                                                     | 1.2E-02-1.2E-02   |
| Ophthalmic Disease                                    | GRIN3A                                                                   | 1.2E-02-1.2E-02   |
| Renal and Urological Disease                          | GRIN3A                                                                   | 1.8E-02-1.8E-02   |
| Reproductive System Development and Function          | WNT3A,PRDM14                                                             | 1.94E-02-4.43E-02 |
| Gene Expression                                       | WNT3A                                                                    | 2.09E-02-2.09E-02 |
| Inflammatory Disease                                  | ZNF331,ADAMTSL3,WNT3A,AGBL1,HLA-G,XIAP,GRIN3A,DMBT1,ACPP                 | 2.09E-02-3.7E-02  |
| Behavior                                              | ACPP                                                                     | 2.39E-02-2.39E-02 |
| DNA Replication, Recombination, and Repair            | CHRAC1                                                                   | 2.53E-02-2.53E-02 |
| Carbohydrate Metabolism                               | ACPP                                                                     | 2.83E-02-2.83E-02 |
| Lipid Metabolism                                      | ACPP                                                                     | 2.83E-02-2.83E-02 |
| Molecular Transport                                   | ACPP                                                                     | 2.83E-02-2.83E-02 |
| Small Molecule Biochemistry                           | ACPP                                                                     | 2.83E-02-2.83E-02 |
| Cardiovascular Disease                                | GRK4,TMCC3,OR6N1,ACPP,C17orf46,GRIN3A                                    | 2.99E-02-3.12E-02 |
| Connective Tissue Disorders                           | ZNF331,ADAMTSL3,WNT3A,AGBL1,HLA-G,XIAP,ACPP                              | 3.01E-02-3.01E-02 |
| Nutritional Disease                                   | GRIN3A                                                                   | 3.56E-02-3.56E-02 |
| Post-Translational Modification                       | USP6                                                                     | 4.29E-02-4.29E-02 |
| Endocrine System Development and Function             | WNT3A                                                                    | 4.86E-02-4.86E-02 |
| Organ Morphology                                      | WNT3A                                                                    | 4.86E-02-4.86E-02 |
