# Supplementary material for: Identifying breast cancer risk loci by global differential allele-specific expression (DASE) analysis in mammary epithelial transcriptome
Source: PubMed Central journal article supplement (PMC3532379; doi:10.1186/1471-2164-13-570), 2012-10-30
Supplement: 1471-2164-13-570-S4.pdf [file 1471-2164-13-570-S4.pdf]

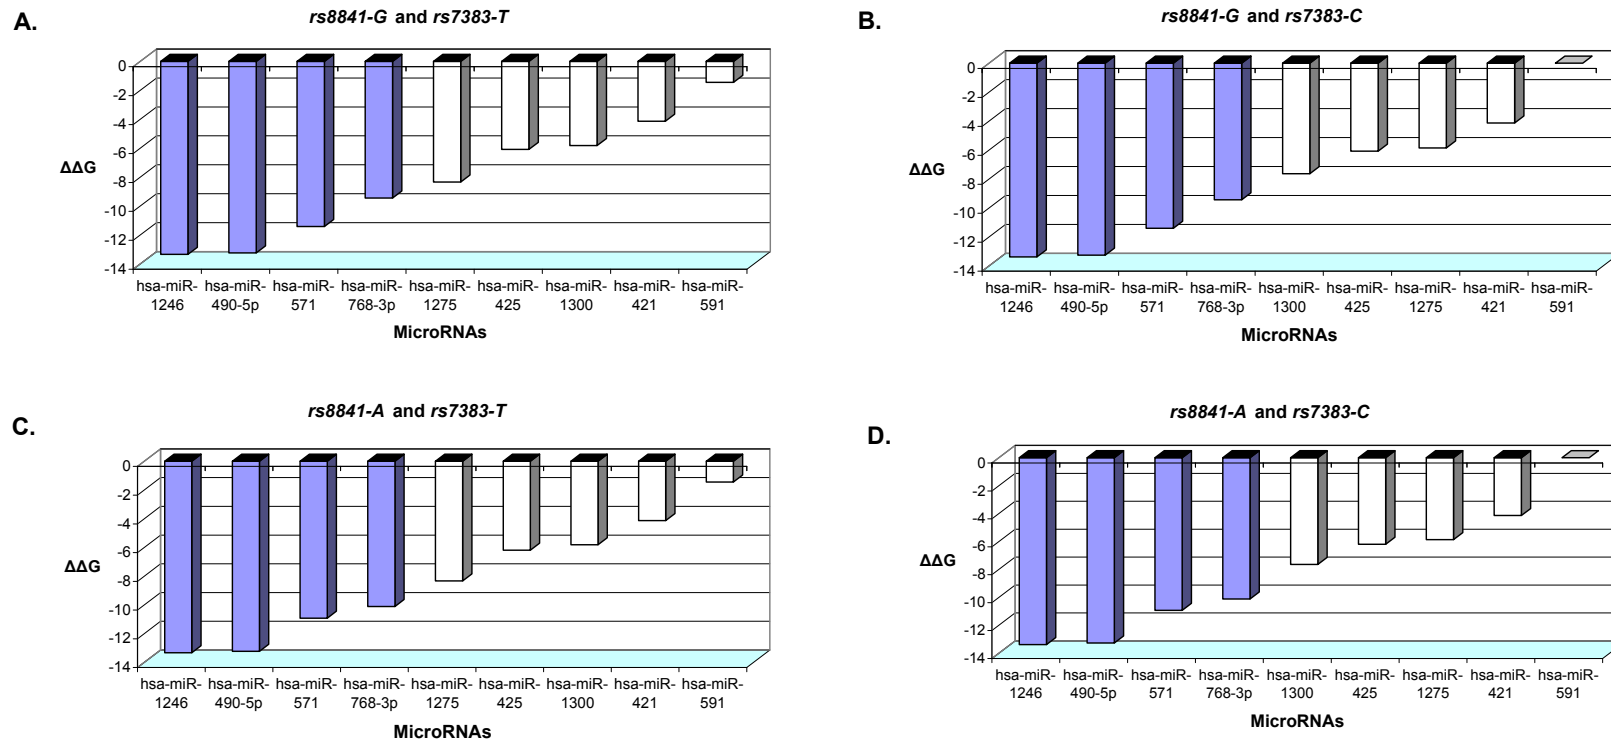

**Figure S2. Predictions of microRNA-targeting at DMBT1 3'UTR.** An online miRNA-targeting tool, Probability of Interaction by Target Accessibility (PITA - [http://genie.weizmann.ac.il/pubs/mir07/mir07\\_dyn\\_data.html](http://genie.weizmann.ac.il/pubs/mir07/mir07_dyn_data.html)), was utilized to compare the effects of the variants at 3'UTR of *DMBT1* on miRNA binding. Moderate search stringency (e.g., minimum seed size = 7, no single mismatch or G:U wobble allowed) were applied for the analysis. Predicted miRNAs with  $\Delta\Delta G$  values below -10 are highlighted in blue and are likely to be functional in endogenous microRNA expression levels (**A,B,C,D**: Different genotype combinations of two SNPs, rs8841 and rs7383, which were identified in sample HMEC-1 and -5).
